# Supplementary material
Source: MDPI journal article supplement (https://www.mdpi.com/1660-4601/12/6/6423)
Supplement: s1 [file s1]

# What is the Relationship between Risky Outdoor Play and Health in Children? A Systematic Review

---

## Additional File 1. Search Strategy

### Initial Search Strategy

#### MEDLINE (Ovid)

1. Risk taking/
2. Risk Management/
3. Safety/
4. Safety management/
5. or/1-4
6. "Play and Playthings"/
7. 5 and 6
8. ((risky or risk taking) adj3 play\*).tw.
9. 7 or 8

#### PsycInfo (Ovid)

1. Risk taking/
2. Risk perception/
3. Safety/
4. or/1-3
5. Childhood Play Behavior/
6. Childhood Play Development/
7. Childrens Recreational Games/
8. Playgrounds/
9. or/5-8

#### CINAHL (EBSCOhost)

- # Query
- S14 S12 or S13
- S13 (S1 and S2) or S3 or S11
- S12 ((S1 and S2) or S3 or S11) and child\*
- S11 S9 and (S10 or S2)\
- S10 TI play
- S9 S7 and S8
- S8 ((risk\* or adventur\*) and play\*)
- S7 S4 or S5 or S6

- S6 MH “Motor Skills+” or MH “Cognition+” or MH “Mental Processes+” or MH “Mental Health” or MH “Mental Disorders+” or MH “Substance-Related Disorders+” or MH “Personality Development+” or MH “Impulsive Behavior+” or MH “Social Behavior+” or MH “Psychological Well-Being”
- S5 MH “Physical endurance” or MH “Physical exertion” or MH “musculoskeletal physiological processes” or MH “exercise” or MH “movement” or MH “locomotion” or MH “running” or MH “swimming” or MH “walking” or MH “motor activity” or MH “Behavior and Behavior Mechanisms+” or MH “Psychological Processes and Principles+”
- S4 MH “Physical Fitness” or MH “Sedentary Lifestyle” or MH “Obesity+” or MH “Overweight+” or MH “Body Fat Distribution” or MH “Body composition” or MH “Waist Circumference” or MH “Skinfold Thickness” or MH “Body weights and measures+”
- S3 risky N3 play\* or risk taking N3 play\*
- S2 (MH “Play and Playthings”)
- S1 (MH “Risk Taking Behavior”) OR (MH “Attitude to Risk”) OR (MH “Risk Assessment”)

**ERIC (Proquest)**

(esu(Risk) AND esu(Play)) OR “risky play”

**SportDiscus (EBSCOhost)**

((DE “Play”) and child\*) OR (DE “Playgrounds”)) AND (DE “RISK-taking (Psychology)” or risky or (risk not (“at risk” or risk factor\*)))

**Secondary Search Strategy**

**MEDLINE (Ovid)**

Unsupervised play—MEDLINE draft

**PsycInfo (Ovid)**

((play AND (unsupervised OR no N2 supervision OR without n2 supervision OR unaccompanied OR unescorted OR adult\* n2 presen\* OR independent play OR autonomous play))) OR independent mobility) AND child\*

**CINAHL (EBSCOhost)**

((MH “Play and Playthings+”) AND (unsupervised OR no N2 supervision OR without n2 supervision OR unaccompanied OR unescorted OR adult\* n2 presen\* OR independent play OR autonomous play)) OR (independent mobility AND child)

**ERIC (Proquest)**

(esu(play) AND (unsupervised OR no NEAR/2 supervision OR without NEAR/2 supervision OR unaccompanied OR unescorted OR adult\* NEAR/2 presen\* OR independent play OR autonomous play)) or (“independent mobility” and child\*)

**SportDiscus (EBSCOhost)**

(DE “Play” AND (unsupervised OR no N2 supervision OR without n2 supervision OR unaccompanied OR unescorted OR adult\* n2 presen\* OR independent play OR autonomous play)) OR (independent mobility and child\*)

**Additional File 2. Summary of Included Studies.****Table S1.** Summary of included studies.

| First Author  | Year | Country   | Study Design    | Population (n)                      | Age Group                                                                    | Intervention or Exposure                                                                               | Outcome (Measure)                             |
|---------------|------|-----------|-----------------|-------------------------------------|------------------------------------------------------------------------------|--------------------------------------------------------------------------------------------------------|-----------------------------------------------|
| Bundy [1]     | 2009 | Australia | Experimental    | 12<br>Boys = 7<br>Girls = 5         | Range = 5–7 years                                                            | Loose parts on playground (11 weeks)                                                                   | Habitual and Acute PA (accelerometry)         |
| Colwell [2]   | 2005 | USA       | Cross sectional | 60<br>Boys = 33<br>Girls = 27       | Range = 48–73 months<br>Mean = 57.61 months                                  | RTP (direct observation)                                                                               | social competence (peer rated, teacher rated) |
| Dewolf [3]    | 2000 | USA       | Cross sectional | 9<br>Boys = 6<br>Girls = 3          | Range = 42–62 months;<br>Mean = 51 months                                    | RTP frequency (direct observation)                                                                     | peer status (peer rated)                      |
| Engelen [4]   | 2013 | Australia | Cluster RCT     | 221<br>Boys = 119<br>Girls = 102    | Range = 4.7–7.3 years<br>Mean = 6.0 (0.6)                                    | Loose parts on playground (school breaks, 13 weeks); 1 risk reframing session for parents and teachers | Habitual and acute PA, SB (accelerometry)     |
| Floyd [5]     | 2011 | USA       | Cross sectional | 2712<br>Boys = 1532<br>Girls = 1180 | Range = ~ 0–5 years (n = 1155), 6–12 years (n = 1111), 13–18 years (n = 446) | Independent mobility (direct observation)                                                              | PA, SB (SOPARC)                               |
| Hayward [6]   | 1974 | USA       | Cross sectional | 16,419                              | 6–13 years                                                                   | Risky play supportive playground (observer rated)                                                      | Behavioural mapping                           |
| Kirby [7]     | 2011 | Scotland  | Longitudinal    | 641<br>Boys = 313<br>Girls = 328    | Range = 11–15 years                                                          | Independent mobility (self-report)                                                                     | PA (PAQ-C)                                    |
| McCormack [8] | 2011 | Australia | Cross sectional | 927<br>Boys = 424<br>Girls = 503    | Range = 10–12 years                                                          | Independent mobility (Parent report)                                                                   | PA (Pedometer)                                |

Table S1. Cont.

| First Author    | Year | Country | Study Design    | Population (n)                     | Age Group                                                                        | Intervention or Exposure                                                            | Outcome (Measure)                                                                                                                                           |
|-----------------|------|---------|-----------------|------------------------------------|----------------------------------------------------------------------------------|-------------------------------------------------------------------------------------|-------------------------------------------------------------------------------------------------------------------------------------------------------------|
| Page [9]        | 2009 | England | Cross sectional | 1300<br>Male = 639<br>Female = 661 | Range = 10–11 years<br>Mean = 10.95 (0.414)                                      | Local independent mobility (self-report)<br>Area independent mobility (self-report) | PA (accelerometry)                                                                                                                                          |
| Page [10]       | 2010 | England | Cross sectional | 1300<br>Male = 639<br>Female = 661 | Range = 10–11 years<br>Mean = 10.95 (0.414)                                      | Local independent mobility (self-report)<br>Area independent mobility (self-report) | Outdoor active play (self-report)                                                                                                                           |
| Pellegrini [11] | 1988 | USA     | Cross sectional | 94<br>Boys = 48<br>Girls = 46      | kindergartners: 14 months; second graders: 90 months; fourth graders: 117 months | RTP (direct observation)                                                            | Aggression, Antisocial behaviour (self-report)<br>social competence (interpersonal cognitive problem solving procedure)                                     |
| Pellegrini [12] | 1989 | USA     | Cross sectional | 94<br>Boys = 48<br>Girls = 46      | kindergartners: 14 months; second graders: 90 months; fourth graders: 117 months | RTP (direct observation)                                                            | Aggression (observed and teacher rated)<br>Social competence (peer rated);<br>Interpersonal Cognitive Problem Solving procedure; video discrimination task) |
| Pellegrini [13] | 1991 | USA     | Longitudinal    | 94<br>Boys = 48<br>Girls = 46      | kindergartners: 14 months; second graders: 90 months; fourth graders: 117 months | RTP (direct observation)                                                            | social competence (interpersonal cognitive problem solving procedure)                                                                                       |
| Pellegrini [14] | 1993 | USA     | Cross-sectional | Boys = 42                          | Mean = 11.2 years                                                                | RTP relative frequency, vigour and flexibility (direct observation)                 | Social competence (Interpersonal Cognitive Problem Solving procedure; Popularity (peer rated))                                                              |

Table S1. Cont.

| First Author      | Year | Country     | Study Design                | Population (n)                    | Age Group                                                                            | Intervention or Exposure                                             | Outcome (Measure)                                                        |
|-------------------|------|-------------|-----------------------------|-----------------------------------|--------------------------------------------------------------------------------------|----------------------------------------------------------------------|--------------------------------------------------------------------------|
| Pellegrini [15]   | 1995 | USA         | Longitudinal                | Boys = 82                         | Range = 12.02–13.5 years<br>Mean = 12.93                                             | RTP (rough and chase) relative frequency (direct observation)        | social competence (peer-rated)<br>aggression (peer rated, teacher rated) |
| Prezza [16]       | 2001 | Italy       | Cross sectional             | 251<br>Male = 133<br>Female = 118 | Range = 7–12 years<br>Mean = 9.41 years                                              | Global independent mobility score (mother semi-structured interview) | Social (frequency of play with peers)                                    |
| Rubie Davies [17] | 2007 | New Zealand | Prospective cohort (1 year) | ~25,782 students                  | 5–12 years                                                                           | Great heights (measuring playground equipment)                       | Number of students sustaining fractures (school report)                  |
| Schoeppe [18]     | 2014 | Australia   | Cross-sectional             | 191<br>Boys = 73<br>Girls = 118   | Mean = 10.64 (0.89) years                                                            | Independent mobility (child self-report)                             | PA (combined HR and accelerometry)                                       |
| Stone [19]        | 2014 | Canada      | Cross-sectional             | 856<br>Boys = 389<br>Girls = 467  | Mean = 11.0 (0.6) years                                                              | Independent mobility (parent report questionnaire)                   | PA, SB (accelerometry)                                                   |
| Storli [20]       | 2010 | Norway      | Longitudinal                | 16<br>Boys = 9<br>Girls = 7       | Range = 3–5 years                                                                    | Nature (observed)                                                    | PA (accelerometry)                                                       |
| Weinstein [21]    | 1988 | USA         | Pre-post-test               | ~400                              | Range = 5–9.99 years (estimated according to national average for grades identified) | Risky play-supportive playground (observer rated)                    | PA (direct observation)<br>Aggression (direct observation)               |

## References

1. Bundy, A.C.; Lockett, T.; Tranter, P.J.; Naughton, G.A.; Wyver, S.R.; Ragen, J.; Spies, G. The risk is that there is “no risk”: A simple, innovative intervention to increase children’s activity levels. *Int. J. Early Years Educ.* **2009**, *17*, 33–45.
2. Colwell, M.J.; Lindsey, E.W. Preschool children’s pretend and physical play and sex of play partner: connections to peer competence. *Sex Roles* **2005**, *52*, 497–509.
3. DeWolf, D. *Preschool Children’s Negotiation of Intersubjectivity during Rough and Tumble Play*; Louisiana State University: Baton Rouge, LA, USA, 1999.
4. Engelen, L.; Bundy, A.C.; Naughton, G.; Simpson, J.M.; Bauman, A.; Ragen, J.; Baur, L.; Wyver, S.; Tranter, P.; Niehues, A.; *et al.* Increasing physical activity in young primary school children—It’s child’s play: A cluster randomised controlled trial. *Prev. Med.* **2013**, *56*, 319–325.
5. Floyd, M.F.; Bocarro, J.N.; Smith, W.R.; Baran, P.K.; Moore, R.C.; Cosco, N.G.; Edwards, M.B.; Suau, L.J.; Fang, K. Park-based physical activity among children and adolescents. *Amer. J. Prev. Med.* **2011**, *41*, 258–265.

6. Hayward, D.G.; Rothenberg, M.; Beasley, R.R. Children's play and urban playground environments: A comparison of traditional, contemporary, and adventure playground types. *Environ. Behav.* **1974**, *6*, 131–168.
7. Kirby, J.; Levin, K.; Inchley, J. Parental and peer influences on physical activity among Scottish adolescents: A longitudinal study. *J. Phys. Act. Health* **2011**, *8*, 785–793.
8. McCormack, G.; Giles-Corti, B. A cross-sectional study of the individual, social, and built environmental correlates of pedometer-based physical activity among elementary school children. *Int. J. Behav. Nutr. Phys. Act.* **2011**, *8*, 30, doi:10.1186/1479-5868-8-30.
9. Page, A.; Cooper, A.; Griew, P. Independent mobility in relation to weekday and weekend physical activity in children aged 10–11 years: The PEACH Project. *Int. J. Behav. Nutr. Phys. Act.* **2009**, *6*, doi:10.1186/1479-5868-6-2.
10. Page, A.S.; Cooper, A.R.; Griew, P.; Jago, R. Independent mobility, perceptions of the built environment and children's participation in play, active travel and structured exercise and sport: The PEACH Project. *Int. J. Behav. Nutr. Phys. Act.* **2010**, *7*, doi:10.1186/1479-5868-7-17.
11. Pellegrini, A. Elementary-school children's rough-and-tumble play and social competence. *Dev. Psychol.* **1988**, *24*, 802–806.
12. Pellegrini, A.D. Elementary school children's rough-and-tumble play. *Early Child. Res. Quart.* **1989**, *4*, 245–260.
13. Pellegrini, A.D. A longitudinal study of popular and rejected children's rough-and-tumble play. *Early Educ. Dev.* **1991**, *2*, 205–213.
14. Pellegrini, A.D. Boys' rough-and-tumble play, social competence and group composition. *Brit. J. Dev. Psychol.* **1993**, *11*, 237–248.
15. Pellegrini, A.D. A longitudinal study of boys' rough-and-tumble play and dominance during early adolescence. *J. Appl. Dev. Psychol.* **1995**, *16*, 77–93.
16. Prezza, M.; Pilloni, S.; Morabito, C.; Sersante, C.; Alparone, F.R.; Giuliani, M.V. The influence of psychosocial and environmental factors on children's independent mobility and relationship to peer frequentation. *J. Community Appl. Soc. Psychol.* **2001**, *11*, 435–450.
17. Rubie-Davies, C.M.; Townsend, M.A.R. Fractures in New Zealand elementary school settings. *J. Sch. Health* **2007**, *77*, 36–40.
18. Schoeppe, S.; Duncan, M.J.; Badland, H.M.; Oliver, M.; Browne, M. Associations between children's independent mobility and physical activity. *BMC Public Health* **2014**, *14*, doi:10.1186/1471-2458-14-91.
19. Stone, M.R.; Faulkner, G.E.; Mitra, R.; Buliung, R.N. The freedom to explore: Examining the influence of independent mobility on weekday, weekend and after-school physical activity behaviour in children living in urban and inner-suburban neighbourhoods of varying socioeconomic status. *Int. J. Behav. Nutr. Phys. Act.* **2014**, *11*, doi:10.1186/1479-5868-11-5.
20. Storli, R.; Hagen, T.L. Affordances in outdoor environments and children's physically active play in pre-school. *Eur. Early Child. Educ. Res. J.* **2010**, *18*, 445–456.
21. Weinstein, C.S.; Pinciotti, P. Changing a schoolyard: Intentions, design decisions, and behavioral outcomes. *Environ. Behav.* **1988**, *20*, 345–371.

### Additional File 3: Records Screened

Please note that this file is encoded in RIS format to enable citation programs to exchange data.

TY - JOUR

ID - 1

T1 - A national study of neighborhood safety, outdoor play, television viewing, and obesity in preschool children

A1 - Burdette,H.L.

A1 - Whitaker,R.C.

Y1 - 2005/09//

N1 - Accession Number: 2009031131. Language: English. Entry Date: 20051028. Revision Date: 20091218. Publication Type: journal article; research; tables/charts. Commentary: Evenson K and Aytur S. DataBase: research and evaluation results. A national study of neighborhood safety, outdoor play, television viewing, and obesity in preschool children. AM J HEALTH PROMOT 2006 Sep-Oct; 21(1): 59 (commentary) . Journal Subset: Biomedical; Blind Peer Reviewed; Editorial Board Reviewed; Expert Peer Reviewed; Online/Print; Peer Reviewed; USA. Special Interest: Pediatric Care. Instrumentation: Neighborhood Environment for Children Rating Scales. Grant Information: National Institutes of Health (R01-HD41141). No. of Refs: 37 ref. NLM UID: 0376422. Email: burdette@email.chop.edu

KW - Obesity -- Epidemiology -- In Infancy and Childhood

KW - Obesity -- Risk Factors -- In Infancy and Childhood

KW - Physical Activity

KW - Residence Characteristics

KW - Television

KW - Adult

KW - Analysis of Variance

KW - Bivariate Statistics

KW - Body Height

KW - Body Mass Index

KW - Body Weight

KW - Chi Square Test

KW - Child Behavior

KW - Child,Preschool

KW - Cross Sectional Studies

KW - Descriptive Statistics

KW - Female

KW - Funding Source

KW - Interviews

KW - Male

KW - Mothers -- Psychosocial Factors

KW - One-Way Analysis of Variance

KW - Prevalence

KW - Safety

KW - Scales

KW - Socioeconomic Factors

KW - United States

KW - Human

KW - SportDiscus exploratory searching

RP - NOT IN FILE

SP - 657

EP - 662

JA - Pediatrics

VL - 116

IS - 3

U2 - PMID: 16140705

**N2 - OBJECTIVE:** To test the hypothesis that preschool children have a higher prevalence of obesity, spend less time playing outdoors, and spend more time watching television (TV) when they live in neighborhoods that their mothers perceive as unsafe. **METHODS:** In a cross-sectional survey in 20 large US cities, mothers reported the average daily time of outdoor play and TV viewing for their 3-year-old children, and the children's BMI was measured. Maternal perception of neighborhood safety was assessed with the Neighborhood Environment for Children Rating Scales; the scale score was used to divide children into tertiles of neighborhood safety. **RESULTS:** Of the 3141 children studied, 35% lived in households with incomes below the US poverty threshold. After adjustment for sociodemographic factors (household income and mothers' education, race/ethnicity, age, and marital status), obesity prevalence (BMI > or =95th percentile) did not differ in children from the least safe to the safest neighborhood safety tertile (18% vs 17% vs 20%) or in weekday (160 vs 151 vs 156 minutes/day) or weekend (233 vs 222 vs 222 minutes/day) outdoor play time. Children who lived in neighborhoods that were perceived by their mothers as the least safe watched more TV (201 vs 182 vs 185 minutes/day) and were more likely to watch >2 hours/day (66% vs 60% vs 62%). TV viewing and outdoor play minutes were not significantly correlated to each other or to BMI. **CONCLUSIONS:** In a national sample of preschool children, mothers' perception of neighborhood safety was related to their children's TV viewing time but not to their outdoor play time or risk for obesity

SN - 0031-4005

AD - Children's Hospital of Philadelphia, Division of Gastroenterology and Nutrition, 34th Street and Civic Center Boulevard, Philadelphia, PA 19104

UR - 16140705

ER -

TY - JOUR

ID - 2

T1 - Adolescent experimentation -- risky business or child's play?

A1 - Sweeney,C.T.

Y1 - 2002/03/25/

N1 - Accession Number: 2005069543. Language: English. Entry Date: 20050429. Revision Date: 20110916.

Publication Type: journal article. Journal Subset: Nursing; USA. No. of Refs: 9 ref. NLM UID: 9892044

KW - Adolescent Behavior

KW - Risk Taking Behavior -- In Adolescence

KW - Adolescence

KW - Health Services Accessibility

KW - Sexuality

KW - Reviewer Nominated

RP - NOT IN FILE

EP - 4p

JA - Nursing Spectrum -- New York & New Jersey Edition

VL - 14A

IS - 6

SN - 1081-3101

AD - Clinical Director, Urban Solutions, Philadelphia

UR - <http://search.ebscohost.com/login.aspx?direct=true&db=cin20&AN=2005069543&site=ehost-live>

ER -

TY - JOUR

ID - 3

T1 - Clinical report---Injuries in youth soccer

A1 - Koutures,C.

A1 - Gregory,A.J.M.

Y1 - 2010/02//

N1 - Accession Number: 2010586357. Corporate Author: Council on Sports Medicine and Fitness. Language:

English. Entry Date: 20100402. Publication Type: journal article; tables/charts. Journal Subset: Biomedical;

Blind Peer Reviewed; Editorial Board Reviewed; Expert Peer Reviewed; Online/Print; Peer Reviewed; USA.

Special Interest: Pediatric Care. No. of Refs: 48 ref. NLM UID: 0376422

KW - Athletic Injuries -- Prevention and Control -- In Adolescence



KW - Soccer  
KW - Adolescence  
KW - Athletic Injuries -- Risk Factors  
KW - Brain Concussion  
KW - Eye Injuries  
KW - Facial Injuries  
KW - Reviewer Nominated  
RP - NOT IN FILE  
SP - 410  
EP - 414  
JA - Pediatrics  
VL - 125  
IS - 2  
U2 - PMID: 20100755  
N2 - Injury rates in youth soccer, known as football outside the United States, are higher than in many other contact/collision sports and have greater relative numbers in younger, preadolescent players. With regard to musculoskeletal injuries, young females tend to suffer more knee injuries, and young males suffer more ankle injuries. Concussions are fairly prevalent in soccer as a result of contact/collision rather than purposeful attempts at heading the ball. Appropriate rule enforcement and emphasis on safe play can reduce the risk of soccer-related injuries. This report serves as a basis for encouraging safe participation in soccer for children and adolescents  
SN - 0031-4005  
UR - 20100755  
ER -  
  
TY - JOUR  
ID - 4  
T1 - Identification of risk factors and effective intervention strategies corresponding to the major causes of childhood death from injury  
A1 - Rubsam,J.M.  
Y1 - 2001/09//  
N1 - Accession Number: 2002133026. Language: English. Entry Date: 20021011. Revision Date: 20060106. Publication Type: journal article; review; tables/charts. Journal Subset: Editorial Board Reviewed; Expert Peer Reviewed; Nursing; Peer Reviewed; USA. No. of Refs: 22 ref. NLM UID: 7507218  
KW - Wounds and Injuries -- Risk Factors -- In Infancy and Childhood  
KW - Accidents,Traffic -- Epidemiology -- In Infancy and Childhood  
KW - Child Safety  
KW - Age Factors  
KW - Sex Factors  
KW - Socioeconomic Factors  
KW - Race Factors  
KW - Child Passenger Safety  
KW - Head Protective Devices  
KW - Infant  
KW - Child,Preschool  
KW - Child  
KW - Adolescence  
KW - Male  
KW - Female  
KW - Reviewer Nominated  
RP - NOT IN FILE  
SP - 4  
EP - 8  
JA - Journal of the New York State Nurses Association  
VL - 32  
IS - 2

U2 - PMID: 16052901

N2 - Despite the dawn of a new millennium, unintentional injuries continue to be the leading cause of death in children greater than one year of age in the United States. This review outlines major risk factors that play a role in predicting injury, major causes of injury, and types of interventions successful in reducing childhood injury. This article describes community and national level intervention strategies that have been successful in reducing childhood injury

SN - 0028-7644

AD - Pediatric Trauma Nurse Coordinator, Babies & Children's Hospital of New York, New York Presbyterian Hospital, New York, NY

UR - 16052901

ER -

TY - JOUR

ID - 6

T1 - Psychological determinants of risk taking by children: an integrative model and implications for interventions

A1 - Morrongiello,B.A.

A1 - Lasenby-Lessard,J.

Y1 - 2007/02//

N1 - Accession Number: 2009522710. Language: English. Entry Date: 20080222. Publication Type: journal article. Journal Subset: Biomedical; Blind Peer Reviewed; Editorial Board Reviewed; Europe; Expert Peer Reviewed; Online/Print; Peer Reviewed; Public Health; UK & Ireland. Special Interest: Pediatric Care; Public Health. No. of Refs: 83 ref. NLM UID: 9510056

KW - Child Behavior

KW - Models,Psychological

KW - Risk Taking Behavior

KW - Age Factors

KW - Child

KW - Family

KW - Female

KW - Male

KW - Motivation

KW - Parenting

KW - Play and Playthings

KW - Safety -- Methods

KW - Sex Factors

KW - Social Behavior

KW - Reviewer Nominated

RP - NOT IN FILE

SP - 20

EP - 25

JA - Injury Prevention

VL - 13

IS - 1

U2 - PMID: 17296684

N2 - OBJECTIVES: To draw on empirical findings of the psychological factors that cause elementary-school children to engage in risky play behaviors that can lead to injury, with the aim of developing an integrative model that can support intervention-program planning. METHODS: An extensive review of literature on this topic was conducted, determinants of risk taking for which there was empirical support were identified, and results were synthesized to create an integrative model of children's risk taking. RESULTS: Research on risk taking in children is limited, but the findings support the importance of examining child, family and socio-environmental factors to understand children's risk-taking behaviors. CONCLUSIONS: Development of a model outlining the determinants of risk behaviors can provide a foundation for initiatives that aim to reduce such behaviors and prevent childhood injuries

SN - 1353-8047

UR - 17296684

ER -

TY - JOUR

ID - 7

T1 - The risk factor: play fills the void

A1 - Hopkins,G.

Y1 - 2006/06/15/

N1 - Accession Number: 2009225992. Language: English. Entry Date: 20060908. Publication Type: journal article; case study; pictorial. Journal Subset: Allied Health; Europe; UK & Ireland. Special Interest: Social Work. NLM UID: 9315530

KW - Adoption -- In Infancy and Childhood

KW - Attachment Behavior -- In Infancy and Childhood

KW - Child Behavior Disorders -- Prevention and Control

KW - Play Therapy -- In Infancy and Childhood

KW - Apraxia -- Diagnosis

KW - Child

KW - Male

KW - Multidisciplinary Care Team

KW - Risk Assessment

KW - SportDiscus exploratory searching

RP - NOT IN FILE

SP - 36

EP - 37

JA - Community Care

IS - 1627

SN - 0307-5508

UR - <http://search.ebscohost.com/login.aspx?direct=true&db=cin20&AN=2009225992&site=ehost-live>

ER -

TY - CHAP

ID - 8

T1 - Play as arousal seeking; or the quest for information

A1 - Ellis,M.J.

Y1 - 1976///

N1 - Accession Number: SPH40090; Author: Ellis, M.J. ; Conference: National Conference on the Mental Health Aspects of Sports, Exercise and Recreation, 17th, Atlantic City, 1975.; Language: English; Parent Item: SPH40067; Database Subset: Recreation and Leisure; Publication Type: Book Analytic; Update Code: 19940901; SIRC Article No.: 40090

Accession Number: SPH343803; Author: Butcher, J. ; Language: English; Parent Item: SPHP914; References: 8; General Notes: This research was supported by a research grant from the university of Manitoba SSHRC Fund Committee.; Publication Type: Journal article; Update Code: 19940501; SIRC Article No.: 343803; SportDiscus exploratory searching

KW - \*PLAY

KW - \*SPORTS

KW - \*RISK-taking (Psychology)

KW - AROUSAL (Physiology)

KW - CHILDREN

KW - THEORY

KW - ADULTHOOD

KW - SportDiscus exploratory searching

RP - NOT IN FILE

T2 - In Craig, T.T. (ed.), Humanistic and mental health aspects of sports, exercise and recreation, Chicago, American Medical Association, 1976, p. 77-80

CY - United States

UR -

<https://login.proxy.bib.uottawa.ca/login?url=http://search.ebscohost.com/login.aspx?direct=true&db=s3h&AN=SPH40090&site=ehost-live;http://articles.sirc.ca/search.cfm?id=40090>

ER -

TY - CHAP

ID - 9

T1 - Play attitudes and risk taking as a function of achievement motivation

A1 - Levy,J.

A1 - Bishop,D.W.

Y1 - 1972///

N1 - Accession Number: SPH19641; Author: Levy, J. Author: Bishop, D.W. ; Conference: Canadian symposium on psycho-motor learning and sport psychology, 4th, Waterloo, Ont., 1972.; Language: English; Database Subset: SIRLS Database; Publication Type: Book Analytic; Update Code: 19940901; SIRC Article No.: 19641

Accession Number: SPH343803; Author: Butcher, J. ; Language: English; Parent Item: SPHP914; References: 8; General Notes: This research was supported by a research grant from the university of Manitoba SSHRC Fund Committee.; Publication Type: Journal article; Update Code: 19940501; SIRC Article No.: 343803; SportDiscus exploratory searching

KW - \*PSYCHOLOGY

KW - \*PERSONALITY

KW - \*RISK-taking (Psychology)

KW - \*PLAY

KW - \*ACHIEVEMENT motivation

KW - ATTITUDE (Psychology)

KW - BOYS

KW - CHILDREN

KW - SportDiscus exploratory searching

RP - NOT IN FILE

T2 - In Proceedings - Canadian symposium, 4th - Psychomotor learning and sport psychology, Waterloo, Ont., Oct. 23-25, 1972; Ottawa, Dept. of National Health and Welfare, 1973, p. 483-504

CY - Canada

UR -

<https://login.proxy.bib.uottawa.ca/login?url=http://search.ebscohost.com/login.aspx?direct=true&db=s3h&AN=SPH19641&site=ehost-live;http://articles.sirc.ca/search.cfm?id=19641>

ER -

TY - CHAP

ID - 10

T1 - Play, stress and risk recreation

A1 - Wealand,J.

Y1 - 1982///

N1 - Accession Number: SPH120637; Author: Wealand, J. ; Language: English; Parent Item: SPH120627; References: 9; Database Subset: Recreation and Leisure; Publication Type: Book Analytic; Update Code: 19940901; SIRC Article No.: 120637

Accession Number: SPH343803; Author: Butcher, J. ; Language: English; Parent Item: SPHP914; References: 8; General Notes: This research was supported by a research grant from the university of Manitoba SSHRC Fund Committee.; Publication Type: Journal article; Update Code: 19940501; SIRC Article No.: 343803; SportDiscus exploratory searching

KW - \*RECREATION

KW - \*PLAY

KW - \*STRESS (Physiology)

KW - \*STRESS management

KW - \*RISK-taking (Psychology)

KW - EXAMPLE

KW - SOCIAL psychology

KW - SportDiscus exploratory searching

RP - NOT IN FILE

T2 - In, Wais, E.G. (ed.), Seminar readings: play and stress in everyday life, Wembley, W.A., Dept. for Youth, Sport and Recreation, 1982, p. 24-32

UR -

<https://login.proxy.bib.uottawa.ca/login?url=http://search.ebscohost.com/login.aspx?direct=true&db=s3h&AN=SPH120637&site=ehost-live;http://articles.sirc.ca/search.cfm?id=120637>

ER -

TY - JOUR

ID - 11

T1 - SAFETY Sans SACRIFICES

A1 - Spencer, Anne Marie

Y1 - 2008/08//

N1 - Accession Number: 33653696; Author: Spencer, Anne-Marie ; No. of Pages: 4; Language: English; Publication Type: Journal Article; Update Code: 20080813

KW - \*PLAYGROUNDS

KW - \*LIFE skills

KW - DESIGN & construction

KW - PLAY environments -- Safety measures

KW - RISK-taking (Psychology) in children

KW - SELF-confidence in children

KW - SELF-esteem in children

KW - SportDiscus exploratory searching

RP - NOT IN FILE

SP - 54

EP - 57

JA - Parks & Recreation

VL - 43

IS - 8

N2 - The article discusses the balance between safety and enjoyability in playground design. The need for a certain amount of risk in children's play is discussed, citing children's disinterest in parks that are designed too conservatively. Benefits of healthy risk-taking are discussed, including self-confidence, prevention of fragility, and healthy development of life skills such as self-esteem

SN - 00312215

UR -

<https://login.proxy.bib.uottawa.ca/login?url=http://search.ebscohost.com/login.aspx?direct=true&db=s3h&AN=33653696&site=ehost-live>

ER -

TY - JOUR

ID - 12

T1 - Socialization of children's playground skill

A1 - Butcher, J.

Y1 - 1993/12//

N1 - Accession Number: SPH343803; Author: Butcher, J. ; Language: English; Parent Item: SPHP914; References: 8; General Notes: This research was supported by a research grant from the university of Manitoba SSHRC Fund Committee.; Publication Type: Journal article; Update Code: 19940501; SIRC Article No.: 343803; SportDiscus exploratory searching

KW - \*PLAYGROUNDS

KW - \*PLAY

KW - SOCIOLOGY

KW - CHILDREN

KW - ABILITY

KW - SOCIALIZATION

KW - SportDiscus exploratory searching

RP - NOT IN FILE

SP - 731

EP - 738

JA - Perceptual & Motor Skills

VL - 77

IS - 3 Part 1

CY - United States

N2 - This study analyzed the relationship between playground skill (measured on the Playground Skills Test) and several socialization variables, including opportunities for practice and parental involvement with playground play (measured on a parent's questionnaire). Data were collected for 64 children (24 girls, 40 boys), ages 7 to 9 years. Descriptive statistics were presented for availability of playground equipment, frequency of playground play outside of school hours, and amount of parental involvement. Playground proficiency was not related to frequency of playground play or to direct parental support (attendance and assistance while child was at a playground). Parental perceptions of a child's skill and attempts at risk-taking were significantly correlated with playground proficiency. A regression analysis of all socialization variables showed that the only significant predictor of playground proficiency was a child's risk-taking attempts

SN - 00315125

UR -

<https://login.proxy.bib.uottawa.ca/login?url=http://search.ebscohost.com/login.aspx?direct=true&db=s3h&AN=SPH343803&site=ehost-live;http://articles.sirc.ca/search.cfm?id=343803>

ER -

TY - JOUR

ID - 13

T1 - The effect of a developmental play program on the concept, risk-taking behaviors, and motoric proficiency of mildly handicapped children

A1 - Roswal,G.

A1 - Frith,G.

A1 - Dunleavy,A.O.

Y1 - 1984/03//

N1 - Accession Number: SPH150528; Author: Roswal, G. Author: Frith, G. Author: Dunleavy, A.O. ; Language: English; References: 36; Database Subset: Handicapped/Disabled Sport and Recreation Documents; Publication Type: Journal article; Update Code: 19940901; SIRC Article No.: 150528

Accession Number: SPH343803; Author: Butcher, J. ; Language: English; Parent Item: SPHP914; References: 8; General Notes: This research was supported by a research grant from the university of Manitoba SSHRC Fund Committee.; Publication Type: Journal article; Update Code: 19940501; SIRC Article No.: 343803;

SportDiscus exploratory searching

KW - \*MENTAL retardation

KW - \*PLAY

KW - \*RISK-taking (Psychology)

KW - \*MOTOR ability

KW - CHILDREN

KW - PROGRAMS

KW - SELF-perception

KW - TESTING

KW - CHILDREN'S DEVELOPMENTAL PLAY PROGRAM

KW - REVIEW

KW - DISABILITIES-Mental retardation - research

KW - SportDiscus exploratory searching

RP - NOT IN FILE

SP - 43

EP - 50

JA - Physical Educator

VL - 41

IS - 1

CY - United States

N2 - The purpose of this study was to evaluate the effect of the Children's Developmental Play Program (CDPP) in the behavioral and neuromotor functioning of developmentally disabled children. 32 children between the ages of 5 and 13 years enrolled in educable mentally retarded classed, served as subjects. Data was collected on self concept, risk taking behaviors and motor proficiency of the students. Half of the children were enrolled in the CDPP. Overall improvements were observed in the experimental group, and this especially in both self concept and motor proficiency

SN - 00318981

UR -

<https://login.proxy.bib.uottawa.ca/login?url=http://search.ebscohost.com/login.aspx?direct=true&db=s3h&AN=SPH150528&site=ehost-live>;<http://articles.sirc.ca/search.cfm?id=150528>

ER -

TY - JOUR

ID - 14

T1 - Those daring young men (and women) on the flying trapeze: impetuous folly of calculated mastery?

A1 - Hofsess,L.

Y1 - 1986//Winter

N1 - Accession Number: SPH182250; Author: Hofsess, L. ; Language: English; References: 14; Publication Type: Journal article; Update Code: 19940901; SIRC Article No.: 182250

Accession Number: SPH343803; Author: Butcher, J. ; Language: English; Parent Item: SPHP914; References: 8; General Notes: This research was supported by a research grant from the university of Manitoba SSHRC Fund Committee.; Publication Type: Journal article; Update Code: 19940501; SIRC Article No.: 343803;

SportDiscus exploratory searching

KW - \*PLAY

KW - \*RISK-taking (Psychology)

KW - \*ACROBATICS

KW - \*PSYCHOLOGY

KW - \*PHYSICAL fitness

KW - \*EXERCISE

KW - SURVEYS

KW - ABILITY

KW - MALES

KW - WOMEN

KW - COMPARATIVE studies

KW - SENSATION seeking

KW - SportDiscus exploratory searching

RP - NOT IN FILE

SP - 14

EP - 17

JA - Association for the Anthropological Study of Play Newsletter

VL - 12

IS - 2

CY - United States

UR -

<https://login.proxy.bib.uottawa.ca/login?url=http://search.ebscohost.com/login.aspx?direct=true&db=s3h&AN=SPH182250&site=ehost-live>;<http://articles.sirc.ca/search.cfm?id=182250>

ER -

TY - JOUR

ID - 54

T1 - Neural sensitivity to absolute and relative anticipated reward in adolescents

A1 - Vaidya,J.G.

A1 - Knutson,B.

A1 - O'Leary,D.S.

A1 - Block,R.I.

A1 - Magnotta,V.

Y1 - 2013///  
 N1 - DA - 20130401  
 IS - 1932-6203 (Electronic)  
 IS - 1932-6203 (Linking)  
 LA - eng  
 PT - Journal Article  
 PT - Research Support, N.I.H., Extramural  
 SB - IM  
 KW - Adolescent  
 KW - Adult  
 KW - Anticipation, Psychological  
 KW - Basal Ganglia  
 KW - physiopathology  
 KW - Brain Mapping  
 KW - Child  
 KW - Female  
 KW - Humans  
 KW - Impulsive Behavior  
 KW - Male  
 KW - Motivation  
 KW - Nervous System  
 KW - Prefrontal Cortex  
 KW - Reward  
 KW - Task Performance and Analysis  
 KW - Reviewer Nominated  
 RP - NOT IN FILE  
 SP - e58708  
 JF - PLoS ONE [Electronic Resource]  
 JA - PLoS One  
 VL - 8  
 IS - 3

N2 - Adolescence is associated with a dramatic increase in risky and impulsive behaviors that have been attributed to developmental differences in neural processing of rewards. In the present study, we sought to identify age differences in anticipation of absolute and relative rewards. To do so, we modified a commonly used monetary incentive delay (MID) task in order to examine brain activity to relative anticipated reward value (neural sensitivity to the value of a reward as a function of other available rewards). This design also made it possible to examine developmental differences in brain activation to absolute anticipated reward magnitude (the degree to which neural activity increases with increasing reward magnitude). While undergoing fMRI, 18 adolescents and 18 adult participants were presented with cues associated with different reward magnitudes. After the cue, participants responded to a target to win money on that trial. Presentation of cues was blocked such that two reward cues associated with \$.20, \$1.00, or \$5.00 were in play on a given block. Thus, the relative value of the \$1.00 reward varied depending on whether it was paired with a smaller or larger reward. Reflecting age differences in neural responses to relative anticipated reward (i.e., reference dependent processing), adults, but not adolescents, demonstrated greater activity to a \$1 reward when it was the larger of the two available rewards. Adults also demonstrated a more linear increase in ventral striatal activity as a function of increasing absolute reward magnitude compared to adolescents. Additionally, reduced ventral striatal sensitivity to absolute anticipated reward (i.e., the difference in activity to medium versus small rewards) correlated with higher levels of trait Impulsivity. Thus, ventral striatal activity in anticipation of absolute and relative rewards develops with age. Absolute reward processing is also linked to individual differences in Impulsivity  
 AD - Department of Psychiatry, University of Iowa Carver College of Medicine, Iowa City, Iowa, United States of America. [jatin-vaidya@uiowa.edu](mailto:jatin-vaidya@uiowa.edu)  
 UR - 23544046  
 ER -

TY - JOUR  
 ID - 56



T1 - Mindfulness for adolescents: a promising approach to supporting emotion regulation and preventing risky behavior

A1 - Broderick,P.C.

A1 - Jennings,P.A.

Y1 - 2012///

N1 - DA - 20130129

IS - 1537-5781 (Electronic)

IS - 1533-8916 (Linking)

LA - eng

PT - Journal Article

SB - IM

KW - Adolescent

KW - Adolescent Behavior

KW - Belgium

KW - Humans

KW - Netherlands

KW - Personal Autonomy

KW - Social Identification

KW - Reviewer Nominated

RP - NOT IN FILE

SP - 111

EP - 26, 11

JA - New Dir.Youth Dev

VL - 2012

IS - 136

N2 - This article reviews the contextual and neuropsychological challenges of the adolescent period with particular attention to the role that universal prevention can play in moderating the harmful effects of stress. The centrality of emotion regulation skills to long-term health and wellness suggests their importance in prevention and intervention efforts for youth. Mindfulness has been shown to be an effective means of reducing stress and improving emotion balance in research with adults, although research on mindfulness with adolescents is limited. The authors present available data and describe one potentially effective program for adolescent mindfulness: Learning to BREATHE

AD - West Chester University of Pennsylvania, USA

UR - 23359447

ER -

TY - JOUR

ID - 60

T1 - The effects of risk-glorifying media exposure on risk-positive cognitions, emotions, and behaviors: a meta-analytic review

A1 - Fischer,P.

A1 - Greitemeyer,T.

A1 - Kastenmuller,A.

A1 - Vogrincic,C.

A1 - Sauer,A.

Y1 - 2011/05//

N1 - DA - 20110426

IS - 1939-1455 (Electronic)

IS - 0033-2909 (Linking)

LA - eng

PT - Journal Article

PT - Meta-Analysis

PT - Review

SB - IM

KW - Adolescent

KW - Adolescent Behavior

KW - psychology  
 KW - Adult  
 KW - Advertising as Topic  
 KW - Age Distribution  
 KW - Alcohol Drinking  
 KW - Attitude to Health  
 KW - Automobile Driving  
 KW - Cognition  
 KW - Cross-Sectional Studies  
 KW - Emotions  
 KW - Female  
 KW - Humans  
 KW - Male  
 KW - Mass Media  
 KW - Music  
 KW - Risk-Taking  
 KW - Sexual Behavior  
 KW - Smoking  
 KW - Social Behavior  
 KW - Sports  
 KW - Video Games  
 KW - Young Adult  
 RP - NOT IN FILE  
 SP - 367  
 EP - 390  
 JA - Psychol Bull  
 VL - 137  
 IS - 3

N2 - In recent years, there has been a surge in the quantity of media content that glorifies risk-taking behavior, such as risky driving, extreme sports, or binge drinking. The authors conducted a meta-analysis involving more than 80,000 participants and 105 independent effect sizes to examine whether exposure to such media depictions increased their recipients' risk-taking inclinations. A positive connection was found for overall, combined risk taking ( $g=.41$ ); as well as its underlying dimensions: risk-taking behaviors ( $g=.41$ ), risk-positive cognitions and attitudes ( $g=.35$ ), and risk-positive emotions ( $g=.56$ ). This effect was observed across varying research methods (experimental, correlational, longitudinal); types of media (video games, movies, advertising, TV, music); and differing risk-related outcome measures (e.g., smoking, drinking, risky driving, sexual behavior). Multiple moderator analyses revealed 2 theoretically new boundary conditions for sociocognitive models. First, the effect was stronger for active (i.e., video games) than for passive (e.g., film, music) exposure to risk-glorifying media content. Second, the effect was stronger when there was a high degree of contextual fit between the media content and type of risk-taking measure. The theoretical, practical, and societal implications of the present research synthesis are discussed

AD - Department of Psychology, University of Graz, Graz, Austria. peter.fischer@uni-graz.at

UR - 21341887

ER -

TY - JOUR

ID - 61

T1 - Children's risky play from an evolutionary perspective: the anti-phobic effects of thrilling experiences

A1 - Sandseter,E.B.

A1 - Kennair,L.E.

Y1 - 2011///

N1 - DA - 20120905

IS - 1474-7049 (Electronic)

IS - 1474-7049 (Linking)

LA - eng

PT - Journal Article

SB - IM

KW - Adaptation,Psychological

KW - Anxiety Disorders

KW - prevention & control

KW - psychology

KW - Biological Evolution

KW - Child

KW - Child Development

KW - Child,Preschool

KW - Fear

KW - Humans

KW - Parenting

KW - Phobic Disorders

KW - Play and Playthings

KW - Risk-Taking

KW - Reviewer Nominated

RP - NOT IN FILE

SP - 257

EP - 284

JA - Evol.Psychol

VL - 9

IS - 2

N2 - This theoretical article views children's risky play from an evolutionary perspective, addressing specific evolutionary functions and especially the anti-phobic effects of risky play. According to the non-associative theory, a contemporary approach to the etiology of anxiety, children develop fears of certain stimuli (e.g., heights and strangers) that protect them from situations they are not mature enough to cope with, naturally through infancy. Risky play is a set of motivated behaviors that both provide the child with an exhilarating positive emotion and expose the child to the stimuli they previously have feared. As the child's coping skills improve, these situations and stimuli may be mastered and no longer be feared. Thus fear caused by maturational and age relevant natural inhibition is reduced as the child experiences a motivating thrilling activation, while learning to master age adequate challenges. It is concluded that risky play may have evolved due to this anti-phobic effect in normal child development, and it is suggested that we may observe an increased neuroticism or psychopathology in society if children are hindered from partaking in age adequate risky play

AD - Department of Physical Education, Queen Maud University College of Early Childhood Education (DMMH), Trondheim, Norway. ebs@dmmh.no

UR - 22947972

ER -

TY - JOUR

ID - 62

T1 - Parenting by anxious mothers: effects of disorder subtype, context and child characteristics

A1 - Murray,L.

A1 - Lau,P.Y.

A1 - Arteche,A.

A1 - Creswell,C.

A1 - Russ,S.

A1 - Zoppa,L.D.

A1 - Muggeo,M.

A1 - Stein,A.

A1 - Cooper,P.

Y1 - 2012/02//

N1 - DA - 20120113

IS - 1469-7610 (Electronic)

IS - 0021-9630 (Linking)

LA - eng

PT - Comparative Study  
PT - Journal Article  
PT - Research Support, Non-U.S. Gov't  
SB - IM  
KW - Adult  
KW - Anxiety Disorders  
KW - psychology  
KW - Child Behavior  
KW - Child,Preschool  
KW - Female  
KW - Humans  
KW - Inhibition (Psychology)  
KW - Mother-Child Relations  
KW - Mothers  
KW - Neuropsychological Tests  
KW - Parenting  
KW - Phobic Disorders  
KW - Play and Playthings  
KW - Reviewer Nominated  
RP - NOT IN FILE  
SP - 188  
EP - 196  
JA - J Child Psychol Psychiatry  
VL - 53  
IS - 2

**N2 - BACKGROUND:** There has been increasing research interest in parenting by anxious adults; however, little is known about anxiety-subtype effects, or effects of the context in which parenting is assessed. **METHODS:** Two groups of anxious mothers, social phobia (N = 50), generalised anxiety disorder (N = 38), and nonanxious controls (N = 62) were assessed with their 4.9-year-old children in three tasks: two presented threat specifically relevant to each maternal disorder, namely, a social threat task where the child had to give a speech, and a nonsocial threat task where the child had to explore potentially scary objects; the third was a nonthreat task (playing with play dough). Seven parenting dimensions were scored. Effects on parenting of maternal anxiety subgroup and task, and their interactions, were examined, as were effects of earlier child behavioural inhibition and currently manifest anxiety. **RESULTS:** There were no parenting differences between maternal groups in the nonthreat play-dough task; parenting difficulties in the two anxious groups were principally evident in the disorder-specific challenge. Parenting differences between nonanxious and anxious mothers occurred independently of child characteristics. There was little evidence for particular forms of parenting difficulty being unique to maternal disorder. **CONCLUSIONS:** Anxious mothers' parenting difficulties emerge when occurring under challenge, especially when this is disorder-specific. These effects should be considered in research and clinical practice

AD - Winnicott Research Unit, School of Psychology, University of Reading, Reading, UK.  
lynne.murray@rdg.ac.uk  
UR - 21985622  
ER -

TY - BOOK  
ID - 63  
T1 - Risk and Our Pedagogical Relation to Children: On the Playground and Beyond. SUNY Series, Early Childhood Education: Inquiries and Insights  
A1 - Smith,Stephen J.  
Y1 - 1998///  
KW - Reviewer Nominated  
RP - NOT IN FILE  
PB - State University of New York Press, State University Plaza, Albany, NY 12246 (paperback: ISBN-0-7914-3594-6, \$19.95; hardcover: ISBN-0-7914-3593-8, \$59.50).

N2 - This book uses the playground as a reference point for a phenomenological examination of risk in children's lives and the development of a pedagogy of risk. Chapter 1 defines risk and discusses the use of anecdotes as a methodological device. Chapter 2 examines how considering risk as challenge and adventure leads to questions concerning adults' relationship to children and enabling children to take risks in relative safety. Chapter 3 examines adults' actions with children and the relationality of risk, while chapter 4 focuses on helping children to take risks in relative safety through adult encouragement. Chapter 5 considers direct and indirect social challenges to take risks, distinguishes positive and negative challenges, and examines how the visibility of risk allows the construction of a pedagogy. Chapter 6 maintains that a pedagogy of risk rests upon acknowledging one's own ability to take risks and focuses on how working through apprehensiveness leads to reconciling adults' need to lend security to children's explorations with children's need to test the security of their world. Chapter 7 maintains that a child-oriented language of risk gives a fuller sense of the meaning of young children's physical activity than does the language of skill development, and discusses the importance of attending to the riskiness of children's activity over the course of successive playground encounters. Chapter 8 focuses on implications of the practice of risk and their application to other situations. Chapter 9 makes recommendations for implementing a pedagogical relation sensitive to risk. (Contains approximately 275 references.) (KB)

SN - ISBN-0-7914-3594-6

ER -

TY - JOUR

ID - 64

T1 - Risky play and children's safety: balancing priorities for optimal child development

A1 - Brussoni,M.

A1 - Olsen,L.L.

A1 - Pike,I.

A1 - Sleet,D.A.

Y1 - 2012/09//

N1 - DA - 20121203

IS - 1660-4601 (Electronic)

IS - 1660-4601 (Linking)

LA - eng

PT - Journal Article

PT - Research Support, Non-U.S. Gov't

PT - Review

SB - IM

KW - Reviewer Nominated

KW - Child

KW - Child Development

KW - Child,Preschool

KW - Female

KW - Humans

KW - Male

KW - Play and Playthings

KW - Public Health

KW - Risk-Taking

KW - Safety Management

KW - standards

KW - Wounds and Injuries

KW - prevention & control

RP - NOT IN FILE

SP - 3134

EP - 3148

JF - International Journal of Environmental Research & Public Health [Electronic Resource]

JA - Int.J Environ.Res.Public Health

VL - 9

IS - 9

N2 - Injury prevention plays a key role in keeping children safe, but emerging research suggests that imposing too many restrictions on children's outdoor risky play hinders their development. We explore the relationship between child development, play, and conceptions of risk taking with the aim of informing child injury prevention. Generational trends indicate children's diminishing engagement in outdoor play is influenced by parental and societal concerns. We outline the importance of play as a necessary ingredient for healthy child development and review the evidence for arguments supporting the need for outdoor risky play, including: (1) children have a natural propensity towards risky play; and, (2) keeping children safe involves letting them take and manage risks. Literature from many disciplines supports the notion that safety efforts should be balanced with opportunities for child development through outdoor risky play. New avenues for investigation and action are emerging seeking optimal strategies for keeping children "as safe as necessary," not "as safe as possible." This paradigm shift represents a potential for epistemological growth as well as cross-disciplinary collaboration to foster optimal child development while preserving children's safety

AD - Department of Pediatrics, School of Population and Public Health, British Columbia Injury Research and Prevention Unit, Child and Family Research Institute, University of British Columbia, British Columbia Children's Hospital, L408-4480 Oak Street, Vancouver, V6H 3V4 BC, Canada. mbrussoni@cw.bc.ca

UR - 23202675

ER -

TY - BOOK

ID - 66

T1 - Managing risk in play provision : implementation guide

A1 - Ball,D.

A1 - Gill,T.

A1 - Spiegel,B..

Y1 - 2008///

KW - Reviewer Nominated

RP - IN FILE

CY - [Annesley]

PB - DCSF Publications

SN - 9781847752895 1847752896

ER -

TY - BOOK

ID - 67

T1 - Nothing ventured : balancing risks and benefits in the outdoors

A1 - Gill,Tim.,English Outdoor Council.

Y1 - 2010///

KW - Reviewer Nominated

RP - NOT IN FILE

CY - [England]

PB - English Outdoor Council

SN - 9780956663603 0956663605

ER -

TY - JOUR

ID - 68

T1 - Everyday uncertainties: reframing perceptions of risk in outdoor free play

A1 - Niehues,Anita Nelson

A1 - Bundy,Anita

A1 - Broom,Alex

A1 - Tranter,Paul

A1 - Ragen,Jo

A1 - Engelen,Lina

Y1 - 2013/06/10/

N1 - doi: 10.1080/14729679.2013.798588

KW - Reviewer Nominated

RP - NOT IN FILE

SP - 223

EP - 237

JF - Journal of Adventure Education & Outdoor Learning

VL - 13

IS - 3

PB - Routledge

N2 - This paper reports the results of risk reframing, an intervention to offer parents and educators a context for building new and complex perceptions of risk in children's outdoor free play. Our objective was to alter these adults' perceptions of risk to increase the sustainability of an innovative child-centred playground intervention. Qualitative data in the form of audio-recordings of risk-reframing sessions, brief participant evaluations and field notes kept by project staff were collected and either transcribed in their entirety or summarised in brief written reports. These data were subjected to constant comparative analysis to identify emergent themes. Results suggest that educators and parents benefit from opportunities to share risk perceptions and discuss the costs and benefits for offering outdoor free play to children to achieve their common goals for children: health, happiness and resilience.

SN - 1472-9679

Y2 - 2013/12/04/

M3 - doi: 10.1080/14729679.2013.798588

UR - <http://dx.doi.org/10.1080/14729679.2013.798588>

ER -

TY - BOOK

ID - 75

T1 - Play: How it shapes the brain, opens the imagination, and invigorates the soul

A1 - Brown,S.

Y1 - 2009///

N1 - Brown, S. (2009). Play: How it shapes the brain, opens the imagination, and invigorates the soul . New York: Avery.

KW - Cited Reference

RP - NOT IN FILE

SP - null

VL - null

A2 - null

CY - New York

PB - Avery

T3 - null

SN - null

ER -

TY - BOOK

ID - 92

T1 - Risk: The science and politics of fear

A1 - Gardner,D.

Y1 - 2008///

N1 - Gardner, D. (2008). Risk: The science and politics of fear . Carlton North, VIC: Scribe Publications.

KW - Cited Reference

RP - NOT IN FILE

CY - Carleton North

PB - Scribe Publications

ER -

TY - BOOK

ID - 98

T1 - Understanding and managing risk attitudes

A1 - Hillson,D.

A1 - Murray-Webster,R.  
Y1 - 2007///  
KW - Cited Reference  
RP - NOT IN FILE  
CY - Aldershot  
PB - Gower  
ER -

TY - BOOK  
ID - 113  
T1 - Free-range kids: Giving our children the freedom we had without going nuts with worry  
A1 - Skenazy,L.  
Y1 - 2009///  
KW - Cited Reference  
RP - NOT IN FILE  
CY - San Francisco  
PB - Jossey-Bass  
ER -

TY - BOOK  
ID - 117  
T1 - Playing outdoors: Spaces and places, risk and challenge  
A1 - Tovey,H.  
Y1 - 2007///  
KW - Cited Reference  
RP - NOT IN FILE  
CY - Maidenhead  
PB - Open University Press  
T3 -

ER -

TY - BOOK  
ID - 119  
T1 - Too safe for their own good: How risk and responsibility help teens thrive  
A1 - Ungar,M.  
Y1 - 2007///  
KW - Cited Reference  
RP - NOT IN FILE  
CY - Crow's Nest, NSW  
PB - Inspired Living  
ER -

TY - JOUR  
ID - 120  
T1 - The Sydney playground project: popping the bubblewrap--unleashing the power of play: a cluster randomized controlled trial of a primary school playground-based intervention aiming to increase children's physical activity and social skills  
A1 - Bundy,A.C.  
A1 - Naughton,G.  
A1 - Tranter,P.  
A1 - Wyver,S.  
A1 - Baur,L.  
A1 - Schiller,W.  
A1 - Bauman,A.  
A1 - Engelen,L.



A1 - Ragen,J.  
 A1 - Lockett,T.  
 A1 - Niehues,A.  
 A1 - Stewart,G.  
 A1 - Jessup,G.  
 A1 - Brentnall,J.  
 Y1 - 2011///  
 N1 - DA - 20111007  
 IS - 1471-2458 (Electronic)  
 IS - 1471-2458 (Linking)  
 LA - eng  
 PT - Journal Article  
 PT - Randomized Controlled Trial  
 PT - Research Support, Non-U.S. Gov't  
 SB - IM  
 KW - PubMed related articles - informal  
 KW - Bullying  
 KW - Child  
 KW - Child,Preschool  
 KW - Cluster Analysis  
 KW - Exercise  
 KW - Female  
 KW - Health Promotion  
 KW - methods  
 KW - Humans  
 KW - Male  
 KW - Mental Health  
 KW - New South Wales  
 KW - Overweight  
 KW - prevention & control  
 KW - Play and Playthings  
 KW - psychology  
 KW - Schools  
 KW - SOCIALIZATION  
 RP - NOT IN FILE  
 SP - 680  
 JA - BMC Public Health  
 VL - 11

**N2 - BACKGROUND:** In the Westernised world, numerous children are overweight and have problems with bullying and mental health. One of the underlying causes for all three is postulated to be a decrease in outdoor free play. The aim of the Sydney Playground Project is to demonstrate the effectiveness of two simple interventions aimed to increase children's physical activity and social skills. **METHODS/DESIGN:** This study protocol describes the design of a 3-year cluster randomised controlled trial (CRCT), in which schools are the clusters. The study consists of a 13-week intervention and 1 week each of pre-and post-testing. We are recruiting 12 schools (6 control; 6 intervention), with 18 randomly chosen participants aged 5 to 7 years in each school. The two intervention strategies are: (1) Child-based intervention: Unstructured materials with no obvious play value introduced to the playground; and (2) Adult-based intervention: Risk reframing sessions held with parents and teachers with the aim of exploring the benefits of allowing children to engage in activities with uncertain outcomes. The primary outcome of the study, physical activity as measured by accelerometer counts, is assessed at baseline and post-intervention. Additional assessments include social skills and interactions, self-concept, after school time use and anthropometric data. Qualitative data (i.e., transcriptions of audio recordings from the risk reframing sessions and of interviews with selected teacher and parent volunteers) are analysed to understand their perceptions of risk in play. The control schools have recess as usual. In addition to outcome evaluation, regular process evaluation sessions are held to monitor fidelity to the treatment. **DISCUSSION:** These simple interventions, which could be adopted in every primary school, have the potential of initiating a

self-sustaining cycle of prevention for childhood obesity, bullying and mental ill health. TRIAL  
REGISTRATION: Australian and New Zealand Clinical Trials Registration Number ACTRN12611000089932  
AD - Faculty of Health Sciences, University of Sydney, Lidcombe, Australia. anita.bundy@sydney.edu.au  
UR - 21884603  
ER -

TY - JOUR

ID - 121

T1 - Jumping off and being careful: children's strategies of risk management in everyday life

A1 - Christensen,P.

A1 - Mikkelsen,M.R.

Y1 - 2008/01//

N1 - DA - 20080207

IS - 0141-9889 (Print)

IS - 0141-9889 (Linking)

LA - eng

PT - Journal Article

SB - IM

KW - PubMed related articles - informal

KW - Accidents

KW - Activities of Daily Living

KW - Anthropology,Cultural

KW - Child

KW - Denmark

KW - Female

KW - Humans

KW - Interviews as Topic

KW - Male

KW - Play and Playthings

KW - Risk Management

KW - Risk-Taking

KW - Sex Factors

RP - NOT IN FILE

SP - 112

EP - 130

JF - Sociology of Health & Illness

JA - Sociol.Health Illn.

VL - 30

IS - 1

N2 - This article addresses the complexity of children's risk landscapes through an ethnography of 10- to 12-year-old Danish children. The data revealed how children individually and collectively engaged with risk in their everyday activities. The children assessed risks in relation to their perceptions of their health as strength and control, negotiated the conditions of playing, and attuned their responses to situations of potential social and physical conflict. In the paper this risk engagement is illustrated in a variety of contexts: children's decisions to wear or not to wear a bicycle helmet; playing and games and routine pushing and shoving at school. In looking after themselves, children negotiate rules of participation and they safeguard personal and collective interests. Gender differences in these processes are addressed and discussed. The article argues that risk engagement is an important resource through which children also learn from their own mistakes. This is a necessary learning process when children engage with their personal health and safety. The article critically discusses different sociological frameworks and shows the significance of the study for the growing literature on understanding the meaning of risk in childhood

AD - Institute of Education, University of Warwick, Coventry. P.H.Christensen@warwick.ac.uk

UR - 18254836

ER -

TY - JOUR

ID - 122

T1 - Understanding children's injury-risk behaviors: the independent contributions of cognitions and emotions

A1 - Morrongiello,B.A.

A1 - Lasenby-Lessard,J.

A1 - Matheis,S.

Y1 - 2007/09//

N1 - DA - 20070910

IS - 0146-8693 (Print)

IS - 0146-8693 (Linking)

LA - eng

PT - Journal Article

PT - Research Support, Non-U.S. Gov't

SB - IM

KW - PubMed related articles - informal

KW - Affect

KW - Child

KW - Cognition

KW - Decision Making

KW - Female

KW - Humans

KW - Male

KW - Risk-Taking

KW - Wounds and Injuries

KW - epidemiology

RP - NOT IN FILE

SP - 926

EP - 937

JA - J Pediatr.Psychol.

VL - 32

IS - 8

N2 - OBJECTIVE: Unintentional injuries are a leading threat to the health of elementary-school children, with many injuries happening when children are left to make their own decisions about risk taking during play. The present study sought to identify determinants of children's physical taking. METHODS: An ecologically valid task that posed some threat of injury was used (i.e., highest height of a balance beam they would walk across). Ratings of cognitions (extent of danger, perceived vulnerability for personal injury, potential severity of injury) and emotional reactions (fear, excitement) were taken when on the beam, just before the children walked across. RESULTS: Regression analysis, controlling for age and sex, revealed that risk taking was predicted from ratings of danger, fear, and excitement. CONCLUSIONS: Both cognitive and emotional factors independently contribute to predict children's physical risk taking. Theoretical and practical implications of these findings are discussed

AD - Psychology Department, University of Guelph, Guelph, Ontario N1G 2W1, Canada.

b Morrongiello@uoguelph.ca

UR - 17522114

ER -

TY - JOUR

ID - 123

T1 - Are children and adolescents less active if parents restrict their physical activity and active transport due to perceived risk?

A1 - Carver,A.

A1 - Timperio,A.

A1 - Hesketh,K.

A1 - Crawford,D.

Y1 - 2010/06//

N1 - DA - 20100503

IS - 1873-5347 (Electronic)

IS - 0277-9536 (Linking)  
 LA - eng  
 PT - Journal Article  
 PT - Research Support, Non-U.S. Gov't  
 SB - IM  
 KW - PubMed related articles - informal  
 KW - Adolescent  
 KW - Age Factors  
 KW - Bicycling  
 KW - statistics & numerical data  
 KW - Child  
 KW - Cross-Sectional Studies  
 KW - Exercise  
 KW - Female  
 KW - Humans  
 KW - Linear Models  
 KW - Male  
 KW - Parent-Child Relations  
 KW - Parents  
 KW - psychology  
 KW - Residence Characteristics  
 KW - Risk  
 KW - Safety  
 KW - Sex Factors  
 KW - Time Factors  
 KW - Victoria  
 KW - Walking  
 RP - NOT IN FILE  
 SP - 1799  
 EP - 1805  
 JA - Soc.Sci.Med.  
 VL - 70  
 IS - 11

N2 - The study examined parental restriction of children's active transport and physical activity outside school hours due to safety concerns, and how this restriction was associated with perceived risk and with youth physical activity levels. We used a cross-sectional design with data from children aged 10-11 years (n=170) and adolescents aged 15-17 years (n=270) who participated in the five-year follow-up of the Children Living in Active Neighbourhoods longitudinal study in Melbourne, Australia. Walking/cycling to local destinations was survey-reported. Moderate-to-vigorous physical activity (MVPA) was recorded during non-school hours using accelerometers. Using surveys, parents reported perceived risk of their children being harmed in their neighbourhood, and restrictions they placed on their children's physical activity. Linear regression analyses examined how perceived risk, constrained behaviour, and physical activity were related. We found that perceived risk did not vary by age-group and was positively associated with constrained behaviour among adolescents but not children. Children were subject to higher levels of constrained behaviour than adolescents. Constrained behaviour was negatively associated with active transport among younger boys and among girls in both age-groups. Furthermore, it was negatively associated with younger boys' MVPA on weekends and with adolescent girls' MVPA during evenings. There were no associations between constrained behaviour and active transport or MVPA among adolescent boys. The findings demonstrate that constrained behaviour exhibited by parents may result in lower levels of active transport and of MVPA outside school hours. In particular, this was true for children and adolescent girls. Social interventions to improve perceived safety and physical interventions involving redesign of the built environment to improve actual safety may help to ease parental restriction of their children's active transport and physical activity in their neighbourhood

AD - Deakin University, Burwood, VIC 3125, Australia. alison.carver@deakin.edu.au  
 UR - 20347200  
 ER -

TY - JOUR

ID - 124

T1 - Increasing physical activity in young primary school children--it's child's play: a cluster randomised controlled trial

A1 - Engelen,L.

A1 - Bundy,A.C.

A1 - Naughton,G.

A1 - Simpson,J.M.

A1 - Bauman,A.

A1 - Ragen,J.

A1 - Baur,L.

A1 - Wyver,S.

A1 - Tranter,P.

A1 - Niehues,A.

A1 - Schiller,W.

A1 - Perry,G.

A1 - Jessup,G.

A1 - van der Ploeg,H.P.

Y1 - 2013/05//

N1 - DA - 20130422

IS - 1096-0260 (Electronic)

IS - 0091-7435 (Linking)

LA - eng

PT - Journal Article

PT - Randomized Controlled Trial

PT - Research Support, Non-U.S. Gov't

SB - IM

KW - PubMed related articles - informal

KW - Accelerometry

KW - Adult

KW - Child

KW - Child,Preschool

KW - Early Intervention (Education)

KW - Female

KW - Health Promotion

KW - methods

KW - Humans

KW - Male

KW - Motor Activity

KW - Play and Playthings

KW - School Health Services

KW - Students

KW - statistics & numerical data

RP - NOT IN FILE

SP - 319

EP - 325

JA - Prev.Med.

VL - 56

IS - 5

N2 - OBJECTIVE: To explore the effects of an innovative school-based intervention for increasing physical activity. METHODS: 226 children (5-7 years old) randomly selected from 12 Australian primary schools were recruited to a cluster randomised trial with schools randomly allocated to intervention or control conditions. The 13-week intervention comprised: (1) altering the school playground by introducing loose materials and (2) a teacher-parent intervention exploring perceptions of risk associated with children's free play. The primary outcomes were total accelerometer counts and moderate-vigorous physical activity during break times. Testing took place in Sydney, 2009-2010. RESULTS: 221 participants were tested at baseline. Mixed-effect multilevel

regression revealed a small but significant increase from the intervention on total counts (9400 counts, 95% CI 3.5-15.2,  $p=0.002$ ) and minutes of MVPA (1.8 min, 95% CI 0.5-3.1,  $p=0.006$ ); and a decrease in sedentary activity (2.1 min, 95% CI 0.5-3.8,  $p=0.01$ ) during break times. We retested children in one intervention school after 2 years; they maintained the gains. CONCLUSIONS: Capturing children's intrinsic motivations to play while simultaneously helping adults reconsider views of free play as risky provided increases in physical activity during break times. Using accelerometry as the sole measure of physical activity may underestimate the effect. Trial registration: ACTRN12611000089932

AD - Faculty of Health Sciences, University of Sydney, Lidcombe, Australia. [lina.engelen@sydney.edu.au](mailto:lina.engelen@sydney.edu.au)

UR - 23462477

ER -

TY - JOUR

ID - 125

T1 - Supporting the development of risk-taking behaviours in the early years: an exploratory study

A1 - Waters, Jane

A1 - Begley, Sharon

Y1 - 2007/11//

KW - Reviewer Nominated

RP - NOT IN FILE

SP - 365

EP - 377

JF - Education 3-13

VL - 35

IS - 4

N2 - Children's opportunities for independent play in natural outdoor spaces, and the associated opportunities to take and negotiate risk, are being eroded despite potential links between such play and the development of positive learning dispositions. This paper reports the findings of an exploratory study that documented the risk-taking behaviours displayed by four-year-old children in the natural environment of a Forest School and within their school outdoor play-space. The data indicated that the Forest School environment was better able to support the development of positive risk-taking behaviours. The environmental features that may have contributed to the observed behaviours are considered.

UR - <http://www.tandfonline.com/doi/abs/10.1080/03004270701602632>

L1 - file:///J:/\_Searches/Trembly/Risku Play (Casey Gray)/new articles/Waters-2007-Supporting the devel.pdf

ER -

TY - JOUR

ID - 126

T1 - Physical Risk-taking: Dangerous or endangered?

A1 - Stephenson, Alison

Y1 - 2003/03//

KW - Reviewer Nominated

RP - NOT IN FILE

SP - 35

EP - 43

JA - Early Years

VL - 23

IS - 1

N2 - Young children's enthusiasm for undertaking challenging physical activities is described, and examples are given of physical risk-taking by 4 year olds and by younger children. Having acknowledged the prevalence of such play, three emerging questions are discussed: what are acceptable physical challenges for 4 year olds, how can we juggle the need for challenge with the increasingly restrictive safety requirements, and what may be the wider implications of restricting children's access to physical challenges?

UR - <http://www.tandfonline.com/doi/abs/10.1080/0957514032000045573>

L1 - file:///J:/\_Searches/Trembly/Risku Play (Casey Gray)/new articles/Stephenson Physical risk taking.pdf  
ER -

TY - JOUR

ID - 127

T1 - "If Only" : Outdoor and adventurous activities and generalised academic development

A1 - Dismore,Harriet

A1 - Bailey,Richard

Y1 - 2005/01//

KW - Reviewer Nominated

RP - NOT IN FILE

SP - 9

EP - 19

JF - Journal of Adventure Education & Outdoor Learning

VL - 5

IS - 1

N2 - This paper reports on research conducted as part of a project, the aim of which was to utilise outdoor and adventurous experiences to help schools address their 'if only'factor -- that aspect of learning perceived to be key to raising standards, whether it be the acquisition of knowledge, skills or a change in attitudes to learning. The project involved nine schools and 671 children, all engaged in the "I Can~" project and the follow-up activities that took place at schools. The research was carried out with children, teachers and parents and consisted of a series of focus groups and analysis of children's work. Limitations inherent within the research opportunity prevent the confident attribution of causation. However, the study's findings do offer insight into an under-researched, yet potentially valuable educational experience. The findings suggest that outdoor and adventurous activities can impact upon children's learning in school by addressing their intellectual, affective and social development.

SN - 1472967058520

UR - <http://www.tandfonline.com/doi/abs/10.1080/14729670585200561>

L1 - file:///J:/\_Searches/Trembly/Risku Play (Casey Gray)/new articles/Dismore-2005-If only\_ Outdoor and adventurous.pdf

ER -

TY - JOUR

ID - 128

T1 - Development of T-STAT for early autism screening

A1 - Chiang,C.H.

A1 - Wu,C.C.

A1 - Hou,Y.M.

A1 - Chu,C.L.

A1 - Liu,J.H.

A1 - Soong,W.T.

Y1 - 2013/05//

N1 - Chiang, Chung-Hsin. Wu, Chin-Chin. Hou, Yuh-Ming. Chu, Ching-Lin. Liu, Jiun-Horng. Soong, Wei-Tsuen

Journal of autism and developmental disorders

7904301, hgw

IM

Journal Article. Validation Studies

English

KW - Medline

KW - Autistic Disorder/di [Diagnosis]

KW - Child Behavior

KW - Child

KW - Preschool

KW - Early Diagnosis

KW - Female  
KW - Humans  
KW - Male  
KW - Mass Screening/mt [Methods]  
KW - Play and Playthings  
KW - Questionnaires  
KW - Sensitivity and Specificity  
KW - Taiwan  
RP - NOT IN FILE  
SP - 1028  
EP - 1037  
JF - Journal of Autism & Developmental Disorders  
JA - J Autism Dev.Disord  
VL - 43  
IS - 5  
CY - United States  
N2 - This study's purpose was to modify the Screening Tool for Autism in Two-Year-Olds (STAT) into a Taiwanese version called T-STAT. Study 1 included 15 children with Autism and 15 children with Developmental Delay (DD) or language impairment (LI) aged between 24 and 35 months. Study 2 had 77 young children with Autism, PDD-NOS, or DD/LI as a clinical-based validation sample. In Study 1, the signal detection procedure found that a cutoff score of 2 would yield high sensitivity and specificity in T-STAT. In Study 2, using a score of 2 as a cutoff, the agreement between T-STAT risk and ADOS classification was highly acceptable. Results were promising as a Level 2 screening tool for Autism for ages two to three  
SN - 1573-3432  
AD - Department of Psychology, National Chengchi University, No.64, Sec.2, ZhiNan Rd., Wenshan District, Taipei, 11605, Taiwan. chchiang@nccu.edu.tw  
UR - 22976373  
ER -  
  
TY - JOUR  
ID - 129  
T1 - Quality of interaction between at-risk infants and caregiver at 12-15 months is associated with 3-year autism outcome  
A1 - Wan,M.W.  
A1 - Green,J.  
A1 - Elsabbagh,M.  
A1 - Johnson,M.  
A1 - Charman,T.  
A1 - Plummer,F.  
A1 - BASIS Team.  
Y1 - 2013/07//  
N1 - Wan, Ming Wai. Green, Jonathan. Elsabbagh, Mayada. Johnson, Mark. Charman, Tony. Plummer, Faye. BASIS Team  
Journal of child psychology and psychiatry, and allied disciplines  
hp3, 0375361  
IM  
Journal Article. Research Support, Non-U.S. Gov't  
English  
KW - Medline  
KW - Age Factors  
KW - Child Development Disorders  
KW - Pervasive/di [Diagnosis]  
KW - Pervasive/ge [Genetics]  
KW - Pervasive/px [Psychology]  
KW - Child  
KW - Preschool



KW - Cohort Studies  
 KW - Cross-Sectional Studies  
 KW - Female  
 KW - Genetic Predisposition to Disease/ge [Genetics]  
 KW - Humans  
 KW - Infant  
 KW - Longitudinal Studies  
 KW - Male  
 KW - Mother-Child Relations  
 KW - Neuropsychological Tests  
 KW - Parenting/px [Psychology]  
 KW - Play and Playthings  
 KW - Prognosis  
 KW - Risk Factors  
 KW - Siblings  
 KW - Social Adjustment  
 KW - Social Environment  
 RP - NOT IN FILE  
 SP - 763  
 EP - 771  
 JF - Journal of Child Psychology & Psychiatry & Allied Disciplines  
 JA - J Child Psychol.Psychiatry  
 VL - 54  
 IS - 7  
 CY - England

N2 - **BACKGROUND:** Recent models of the early emergence of autism spectrum disorder (ASD) propose that infant intrinsic risk susceptibilities in behaviour may be amplified by interaction within the early social environment into an increasingly atypical developmental trajectory. This study examines whether 6- and 12-month parent-infant interactions in at-risk siblings differ from those with low-risk and whether--in at-risk siblings--such interactions predict later 3-year classification of ASD or no ASD. **METHOD:** Within the British Autism Study of Infant Siblings (BASIS), 6-min videotaped episodes of parent-infant free play in infants at 6-10months (45 at-risk siblings and 47 low-risk siblings) and 12-15months (43 at-risk siblings and 48 low-risk siblings) in a laboratory setting were rated on the Manchester Assessment of Caregiver-Infant Interaction (MACI), blind to participant information. Standard tests were administered for concurrent behavioural signs of ASD features and developmental level. Systematic consensus diagnostic classification of ASD was made at 3years for the at-risk siblings. **RESULTS:** Parent nondirectiveness and sensitive responsiveness differed in relation to ASD/risk status (at-risk ASD, at-risk no-ASD and low-risk) at both 6 and 12months. At 6months, infant liveliness was lower in the at-risk groups; at 12months, infant attentiveness to parent and positive affect were lower in the at-risk group later diagnosed with ASD. Dyadic mutuality and intensity of engagement showed a group effect at 12months. Dyadic mutuality, infant positive affect and infant attentiveness to parent at 12months (but not 6months) predicted 3-year ASD outcome, whereas infant ASD-related behavioural atypicality did not. **CONCLUSIONS:** This is the first prospective evidence that early dyadic interaction between at-risk infants and their parents is associated with later diagnostic outcome in ASD. Possible explanations for these findings and their theoretical implications are considered. 2012 The Authors. Journal of Child Psychology and Psychiatry 2012 Association for Child and Adolescent Mental Health

SN - 1469-7610

AD - Institute of Brain, Behaviour and Mental Health, University of Manchester, Manchester, UK.

m.w.wan@manchester.ac.uk

UR - 23227853

ER -

TY - JOUR

ID - 130

T1 - Modifiable lifestyle behavior patterns, sedentary time and physical activity contexts: a cluster analysis among middle school boys and girls in the SALTA study

A1 - Marques,E.A.

A1 - Pizarro,A.N.

A1 - Figueiredo,P.

A1 - Mota,J.

A1 - Santos,M.P.

Y1 - 2013/06//

N1 - Marques, Elisa A. Pizarro, Andreia N. Figueiredo, Pedro. Mota, Jorge. Santos, Maria P

Preventive medicine

pm4, 0322116

IM

Journal Article. Research Support, Non-U.S. Gov't

English

KW - Medline

KW - Body Mass Index

KW - Child

KW - Cholesterol

KW - HDL/bl [Blood]

KW - Cluster Analysis

KW - Exercise Test

KW - Female

KW - Health Behavior

KW - Humans

KW - Male

KW - Motor Activity

KW - Physical Fitness

KW - Portugal

KW - Recreation

KW - Risk Assessment

KW - Risk Factors

KW - Sedentary Lifestyle

KW - Students/sn [Statistics & Numerical Data]

KW - Travel

RP - NOT IN FILE

SP - 413

EP - 415

JA - Preventive Medicine

VL - 56

IS - 6

CY - United States

N2 - OBJECTIVE: To analyze how modifiable health-related variables are clustered and associated with children's participation in play, active travel and structured exercise and sport among boys and girls.

METHODS: Data were collected from 9 middle-schools in Porto (Portugal) area. A total of 636 children in the 6th grade (340 girls and 296 boys) with a mean age of 11.64 years old participated in the study. Cluster analyses were used to identify patterns of lifestyle and healthy/unhealthy behaviors. Multinomial logistic regression analysis was used to estimate associations between cluster allocation, sedentary time and participation in three different physical activity (PA) contexts: play, active travel, and structured exercise/sport. RESULTS: Four distinct clusters were identified based on four lifestyle risk factors. The most disadvantaged cluster was characterized by high body mass index, low high-density lipoprotein cholesterol and cardiorespiratory fitness and a moderate level of moderate to vigorous PA. Everyday outdoor play (OR=1.85, 95%CI 0.318-0.915) and structured exercise/sport (OR=1.85, 95%CI 0.291-0.990) were associated with healthier lifestyle patterns. There were no significant associations between health patterns and sedentary time or travel mode. CONCLUSION:

Outdoor play and sport/exercise participation seem more important than active travel from school in influencing children's healthy cluster profiles. Copyright 2013 Elsevier Inc. All rights reserved

SN - 1096-0260

AD - Research Centre in Physical Activity, Health and Leisure (CIAFEL), Faculty of Sport Science, University of Porto, Porto, Portugal. emarques@fade.up.pt

UR - 23567246

ER -

TY - JOUR

ID - 132

T1 - Environmental lead exposure risks associated with children's outdoor playgrounds

A1 - Taylor,M.P.

A1 - Camenzuli,D.

A1 - Kristensen,L.J.

A1 - Forbes,M.

A1 - Zahran,S.

Y1 - 2013/07//

N1 - Taylor, Mark Patrick. Camenzuli, Danielle. Kristensen, Louise Jane. Forbes, Miriam. Zahran, Sammy  
Environmental pollution (Barking, Essex : 1987)

dv1, 8804476

IM

Journal Article. Research Support, Non-U.S. Gov't

English

KW - Medline

KW - Air Pollutants/an [Analysis]

KW - Child

KW - Child Care

KW - Environmental Exposure/an [Analysis]

KW - Environmental Exposure/sn [Statistics &amp; Numerical Data]

KW - Environmental Pollution/sn [Statistics &amp; Numerical Data]

KW - Humans

KW - Lead/an [Analysis]

KW - Lead Poisoning/ep [Epidemiology]

KW - Metallurgy

KW - Play and Playthings

KW - Risk Assessment

KW - Soil Pollutants/an [Analysis]

KW - South Australia

RP - NOT IN FILE

SP - 447

EP - 454

JF - Environmental Pollution

JA - Environ.Pollut.

VL - 178

CY - England

N2 - This study examines exposure risks associated with lead smelter emissions at children's public playgrounds in Port Pirie, South Australia. Lead and other metal values were measured in air, soil, surface dust and on pre- and post-play hand wipes. Playgrounds closest to the smelter were significantly more lead contaminated compared to those further away ( $t(27.545)=3.76$ ;  $p=.001$ ). Port Pirie post-play hand wipes contained significantly higher lead loadings (maximum hand lead value of 49,432 $\mu\text{g}/\text{m}^2$ ) than pre-play hand wipes ( $t(27)=3.57$ ,  $p=.001$ ). A 1% increase in air lead ( $\mu\text{g}/\text{m}^3$ ) was related to a 0.713% increase in lead dust on play surfaces (95% CI, 0.253-1.174), and a 0.612% increase in post-play wipe lead (95% CI, 0.257-0.970). Contaminated dust from smelter emissions is determined as the source and cause of childhood lead poisoning at a rate of approximately one child every third day. Copyright 2013 Elsevier Ltd. All rights reserved

SN - 1873-6424

AD - Environmental Science, Department of Environment and Geography, Faculty of Science, Macquarie University, North Ryde, Sydney, NSW 2109, Australia. mark.taylor@mq.edu.au

UR - 23643852

ER -

TY - JOUR

ID - 133

T1 - Systematic assessment of noise amplitude generated by toys intended for young children

A1 - Mahboubi,H.

A1 - Oliaei,S.

A1 - Badran,K.W.

A1 - Ziai,K.

A1 - Chang,J.

A1 - Zardouz,S.

A1 - Shahriari,S.

A1 - Djalilian,H.R.

Y1 - 2013/06//

N1 - Mahboubi, Hossein. Oliaei, Sepehr. Badran, Karam W. Ziai, Kasra. Chang, Janice. Zardouz, Shawn.

Shahriari, Shawn. Djalilian, Hamid R

Otolaryngology--head and neck surgery : official journal of American Academy of Otolaryngology-Head and Neck Surgery

7909794, 8508176, on7, on8

IM

Comparative Study. Journal Article

English

KW - Medline

KW - Age Factors

KW - Analysis of Variance

KW - Audiometry/mt [Methods]

KW - Auditory Threshold

KW - California

KW - Child Welfare

KW - Child

KW - Preschool

KW - Consumer Product Safety

KW - Female

KW - Hearing Loss

KW - Noise-Induced/et [Etiology]

KW - Noise-Induced/pc [Prevention & Control]

KW - Humans

KW - Infant

KW - Male

KW - Marketing

KW - Needs Assessment

KW - Noise/ae [Adverse Effects]

KW - Play and Playthings

KW - Retrospective Studies

KW - Risk Assessment

RP - NOT IN FILE

SP - 1043

EP - 1047

JF - Otolaryngology - Head & Neck Surgery

JA - Otolaryngol.Head Neck Surg.

VL - 148

IS - 6

CY - England

N2 - OBJECTIVE: To systematically evaluate the noise generated by toys targeted for children and to compare the results over the course of 4 consecutive holiday shopping seasons. STUDY DESIGN: Experimental study.

SETTING: Academic medical center. SUBJECTS AND METHODS: During 2008-2011, more than 200 toys marketed for children older than 6 months were screened for loudness. The toys with sound output of more than 80 dBA at speaker level were retested in a soundproof audiometry booth. The generated sound amplitude of each toy was measured at speaker level and at 30 cm away from the speaker. RESULTS: Ninety different toys were analyzed. The mean (SD) noise amplitude was 100 (8) dBA (range, 80-121 dBA) at the speaker level and

80 (11) dBA (range, 60-109 dBA) at 30 cm away from the speaker. Eighty-eight (98%) had more than an 85-dBA noise amplitude at speaker level, whereas 19 (26%) had more than an 85-dBA noise amplitude at a 30-cm distance. Only the mean noise amplitude at 30 cm significantly declined during the studied period ( $P < .001$ ). There was no significant difference in mean noise amplitude of different toys specified for different age groups. CONCLUSION: Our findings demonstrate the persistence of extremely loud toys marketed for very young children. Acoustic trauma from toys remains a potential risk factor for noise-induced hearing loss in this age group, warranting promotion of public awareness and regulatory considerations for manufacture and marketing of toys

SN - 1097-6817

AD - Division of Neurotology and Skull Base Surgery, Department of Otolaryngology-Head and Neck Surgery, University of California, Irvine, California 92868, USA

UR - 23525849

ER -

TY - JOUR

ID - 134

T1 - Do features of public open spaces vary between urban and rural areas?

A1 - Veitch,J.

A1 - Salmon,J.

A1 - Ball,K.

A1 - Crawford,D.

A1 - Timperio,A.

Y1 - 2013/02//

N1 - Veitch, Jenny. Salmon, Jo. Ball, Kylie. Crawford, David. Timperio, Anna

Preventive medicine

pm4, 0322116

IM

Comparative Study. Journal Article. Research Support, Non-U.S. Gov't

English

KW - Medline

KW - Adult

KW - Australia

KW - Child

KW - Environment Design

KW - Health Promotion/st [Standards]

KW - Humans

KW - Lighting

KW - Motor Activity

KW - Obesity/pc [Prevention & Control]

KW - Play and Playthings

KW - Public Facilities

KW - Rural Population/sn [Statistics & Numerical Data]

KW - Safety

KW - Social Planning

KW - Urban Population/sn [Statistics & Numerical Data]

KW - Urban Renewal/st [Standards]

RP - NOT IN FILE

SP - 107

EP - 111

JA - Preventive Medicine

VL - 56

IS - 2

CY - United States

N2 - OBJECTIVE: Parks are an important setting for physical activity and specific park features have been shown to be associated with park visitation and physical activity. Most park-based research has been conducted in urban settings with few studies examining rural parks. This study examined differences in features of parks in

urban compared with rural areas. METHODS: In 2009/10 a tool was developed to audit 433 urban and 195 rural parks located in disadvantaged areas of Victoria, Australia. Features assessed included: access; lighting/safety; aesthetics; amenities; paths; outdoor courts/ovals; informal play spaces; and playgrounds (number, diversity, age appropriateness and safety of play equipment). RESULTS: Rural parks scored higher for aesthetics compared with urban parks (5.08 vs 4.44). Urban parks scored higher for access (4.64 vs 3.89), lighting/safety (2.01 vs 1.76), and diversity of play equipment (7.37 vs 6.24), and were more likely to have paths suitable for walking/cycling (58.8% vs 40.9%) and play equipment for older children (68.2% vs 17.1%). CONCLUSION: Although the findings cannot be generalized to all urban and rural parks, the results may be used to inform advocacy for park development in rural areas to create parks that are more supportive of physical activity for children and adults. Copyright 2012 Elsevier Inc. All rights reserved

SN - 1096-0260

AD - Centre for Physical Activity and Nutrition Research, Deakin University, Burwood, Victoria 3125, Australia. jenny.veitch@deakin.edu.au

UR - 23201001

ER -

TY - JOUR

ID - 135

T1 - JAMA patient page. Summer safety for kids

A1 - Goodman,D.M.

A1 - Lynn,C.

A1 - Livingston,E.H.

Y1 - 2013/06//

N1 - Goodman, Denise M. Lynn, Cassio. Livingston, Edward H

JAMA : the journal of the American Medical Association

7501160

AIM, IM

Patient Education Handout

English

KW - Medline

KW - Child

KW - Humans

KW - Play and Playthings

KW - Risk

KW - Safety

KW - Seasons

KW - United States/ep [Epidemiology]

KW - Wounds and Injuries/mo [Mortality]

KW - Wounds and Injuries/pc [Prevention & Control]

RP - NOT IN FILE

SP - 2505

JF - JAMA

VL - 309

IS - 23

CY - United States

SN - 1538-3598

UR - 23780466

ER -

TY - JOUR

ID - 136

T1 - Children's physical activity and parents' perception of the neighborhood environment: neighborhood impact on kids study

A1 - Tappe,K.A.

A1 - Glanz,K.

A1 - Sallis,J.F.

A1 - Zhou,C.

A1 - Saelens,B.E.

Y1 - 2013///

N1 - Tappe, Karyn A. Glanz, Karen. Sallis, James F. Zhou, Chuan. Saelens, Brian E

The international journal of behavioral nutrition and physical activity

101217089

IM

Journal Article. Research Support, N.I.H., Extramural

English

KW - Medline

KW - Actigraphy

KW - California

KW - Child

KW - Child Behavior

KW - Crime

KW - Data Collection

KW - Environment

KW - Environment Design

KW - Esthetics

KW - Exercise

KW - Female

KW - Health Behavior

KW - Humans

KW - Male

KW - Motor Activity

KW - Multivariate Analysis

KW - Obesity/pc [Prevention & Control]

KW - Parents

KW - Perception

KW - Recreation

KW - Residence Characteristics

KW - Safety

KW - Washington

RP - NOT IN FILE

SP - 39

JF - International Journal of Behavioral Nutrition & Physical Activity

JA - Int.

VL - 10

CY - England

N2 - **BACKGROUND:** Physical activity is important to children's physical health and well-being. Many factors contribute to children's physical activity, and the built environment has garnered considerable interest recently, as many young children spend much of their time in and around their immediate neighborhood. Few studies have identified correlates of children's activity in specific locations. This study examined associations between parent report of their home neighborhood environment and children's overall and location-specific physical activity. **METHODS:** Parents and children ages 6 to 11 (n=724), living in neighborhoods identified through objective built environment factors as high or low in physical activity environments, were recruited from Seattle and San Diego metropolitan areas, 2007-2009. Parents completed a survey about their child's activity and perceptions of home neighborhood environmental attributes. Children wore an accelerometer for 7 days. Multivariate regression models explored perceived environment correlates of parent-reported child's recreational physical activity in their neighborhood, in parks, and in general, as well as accelerometry-based moderate-to-vigorous activity (MVPA) minutes. **RESULTS:** Parent-reported proximity to play areas correlated positively with both accelerometry MVPA and parent-reported total child physical activity. Lower street connectivity and higher neighborhood aesthetics correlated with higher reported child activity in the neighborhood, while reported safety from crime and walk and cycle facilities correlated positively with reported child activity in public recreation spaces. **CONCLUSIONS:** Different aspects of parent's perceptions of the neighborhood environment appear to correlate with different aspects of children's activity. However, prioritizing closer

proximity to safe play areas may best improve children's physical activity and, in turn, reduce their risk of obesity and associated chronic diseases

SN - 1479-5868

AD - Department of Biostatistics and Epidemiology, Perelman School of Medicine, University of Pennsylvania, Philadelphia, USA

UR - 23531282

ER -

TY - JOUR

ID - 137

T1 - Determinants of vitamin D status in young children: results from the Belgian arm of the IDEFICS (Identification and Prevention of Dietary- and Lifestyle-Induced Health Effects in Children and Infants) Study

A1 - Sioen,I.

A1 - Mouratidou,T.

A1 - Kaufman,J.M.

A1 - Bammann,K.

A1 - Michels,N.

A1 - Pigeot,I.

A1 - Vanaelst,B.

A1 - Vyncke,K.

A1 - De,Henauw S.

A1 - IDEFICS consortium.

Y1 - 2012/06//

N1 - Sioen, Isabelle. Mouratidou, Theodora. Kaufman, Jean-Marc. Bammann, Karin. Michels, Nathalie. Pigeot, Iris. Vanaelst, Barbara. Vyncke, Krishna. De Henauw, Stefaan. IDEFICS consortium

Public health nutrition

9808463, dgy

IM

Journal Article. Research Support, Non-U.S. Gov't

English

KW - Medline

KW - Adipose Tissue

KW - Belgium/ep [Epidemiology]

KW - Body Constitution

KW - Body Mass Index

KW - Child

KW - Cross-Sectional Studies

KW - Female

KW - Health Status

KW - Humans

KW - Male

KW - Obesity

KW - Abdominal/co [Complications]

KW - Play and Playthings

KW - Prevalence

KW - Reference Values

KW - Regression Analysis

KW - Risk Factors

KW - Seasons

KW - Sunlight

KW - Vitamin D/aa [Analog & Derivatives]

KW - Vitamin D/bl [Blood]

KW - Vitamin D Deficiency/bl [Blood]

KW - Vitamin D Deficiency/ep [Epidemiology]

KW - Vitamin D Deficiency/et [Etiology]

RP - NOT IN FILE



SP - 1093

EP - 1099

JF - Public Health Nutrition

JA - Public Health Nutr

VL - 15

IS - 6

CY - England

N2 - OBJECTIVE: To describe the vitamin D status of Belgian children and examine the influence of non-nutritional determinants, in particular of anthropometric variables. DESIGN: Cross-sectional data of Belgian participants of the EU 6th Framework Programme IDEFICS (Identification and Prevention of Dietary- and Lifestyle-Induced Health Effects in Children and Infants) Study. SETTING: 25-Hydroxyvitamin D (25(OH)D) was measured using RIA. Vitamin D status was categorized as deficient (<25 nmol/l), insufficient (25-50 nmol/l), sufficient (50-75 nmol/l) and optimal ( $\geq$ 75 nmol/l). Anthropometric measurements included height, weight, waist and hip circumferences and triceps and subscapular skinfold thicknesses. SUBJECTS: Children (n 357) aged 4-11 years. RESULTS: Serum 25(OH)D ranged from 13.6 to 123.5 nmol/l (mean 47.2 (sd 14.6) nmol/l); with 5 % deficient, 53 % insufficient, 40 % sufficient and 2 % optimal. No significant differences were found by age and gender. Significant differences in 25(OH)D were observed for month of sampling ( $P < 0.001$ ), number of hours playing outside per week ( $r = 0.140$ ), weight ( $r = -0.121$ ), triceps ( $r = -0.112$ ) and subscapular ( $r = -0.119$ ) skinfold thickness, sum of two skinfold thicknesses ( $r = -0.125$ ) and waist circumference ( $r = -0.108$ ). Linear regression analysis of 25(OH)D adjusted for age, month of sampling and hours playing outside per week suggested that (i) weight, (ii) BMI Z-score, (iii) waist circumference and (iv) triceps and subscapular skinfold thickness (as well as the sum of both) independently influenced 25(OH)D. CONCLUSIONS: The majority of Belgian children had a suboptimal vitamin D status, with more than half having an insufficient status in winter and spring. Month of the year, weekly number of hours playing outside and body composition - both central and abdominal obesity - were identified as important determinants of vitamin D status in Belgian children

SN - 1475-2727

AD - Department of Public Health, Ghent University, UZ 2 Blok A, De Pintelaan 185, B-9000 Ghent, Belgium. Isabelle.Sioen@UGent.be

UR - 22152637

ER -

TY - JOUR

ID - 138

T1 - Elevated serum levels of interleukin-17A in children with autism

A1 - Al-Ayadhi,L.Y.

A1 - Mostafa,G.A.

Y1 - 2012///

N1 - Al-Ayadhi, Laila Yousef. Mostafa, Gehan Ahmed

Journal of neuroinflammation

101222974

IM

Journal Article. Research Support, Non-U.S. Gov't

English

KW - Medline

KW - Autistic Disorder/bl [Blood]

KW - Autistic Disorder/di [Diagnosis]

KW - Autistic Disorder/et [Etiology]

KW - Biological Markers/bl [Blood]

KW - Child

KW - Cross-Sectional Studies

KW - Female

KW - Humans

KW - Interleukin-17/bl [Blood]

KW - Male

KW - Risk Factors

KW - Serum/me [Metabolism]

RP - NOT IN FILE

SP - 158

JF - Journal of Neuroinflammation

JA - J Neuroinflammation

VL - 9

CY - England

N2 - BACKGROUND: The T-helper (Th)1/Th2 dichotomy dominated the field of immune regulation until interleukin (IL)-17-expressing T cells (Th17) were proposed to be a third lineage of helper T cells, the key players in the pathogenesis of autoimmune disorders. Autoimmunity to brain tissue may play a pathogenic role in autism. IL-17A is a pro-inflammatory cytokine that has been shown to play an important role in various autoimmune neuroinflammatory diseases. The aim of this study was to measure serum levels of IL-17A in relation to the degree of the severity of autism. METHODS: Serum IL-17A levels were measured by ELISA in 45 children with autism and 40 matched healthy controls. RESULTS: Children with autism had significantly higher serum IL-17A levels than healthy controls ( $P < 0.001$ ), with increased serum levels of IL-17A found in 48.9% of the autism group. Patients with severe autism had significantly higher serum IL-17A levels than those with mild to moderate autism ( $P = 0.01$ ), and raised serum IL-17A levels were significantly more common in children with severe autism (67.9%) than in those with mild to moderate autism (17.6%),  $P = 0.001$ .

CONCLUSIONS: Serum IL-17A levels were raised in the group with autism, and the levels correlated significantly with the severity of autism. This is the first study to measure levels of IL-17A in relation to the severity of autism, to our knowledge. Further research, with a larger subject population, is warranted to determine whether the increase of serum IL-17A levels plasma has a pathogenic role in autism, and whether anti-IL-17A therapy could be useful

SN - 1742-2094

AD - Department of Physiology, Autism Research and Treatment Center, Al-Amodi Autism Research Chair, Faculty of Medicine, King Saud University, Riyadh, Saudi Arabia

UR - 22748016

ER -

TY - JOUR

ID - 139

T1 - Effect of play-based summer break exercise on cardiovascular function in adolescents

A1 - Meucci, M.

A1 - Curry, C.D.

A1 - Baldari, C.

A1 - Guidetti, L.

A1 - Cook, C.

A1 - Collier, S.R.

Y1 - 2013/01//

N1 - Meucci, Marco. Curry, Chelsea D. Baldari, Carlo. Guidetti, Laura. Cook, Carol. Collier, Scott R  
Acta paediatrica (Oslo, Norway : 1992)

bgc, 9205968

IM

Comparative Study. Journal Article. Research Support, Non-U.S. Gov't

English

KW - Medline

KW - Adolescent

KW - Cardiovascular Diseases/ep [Epidemiology]

KW - Cardiovascular Physiological Phenomena

KW - Child

KW - Exercise/ph [Physiology]

KW - Female

KW - Humans

KW - Male

KW - Play and Playthings

KW - Risk Factors

KW - Seasons

RP - NOT IN FILE

SP - e24

EP - e28

JF - Acta Paediatrica

JA - Acta Paediatr

VL - 102

IS - 1

CY - Norway

N2 - AIM: To compare the effects of 4 and 8 weeks of play-based, supervised exercise during summer break versus an unsupervised break on cardiovascular function in adolescent children. METHODS: Twenty-two subjects were divided into a 4-week exercise group (age 10.1 +/- 1.3 years), an 8-week exercise group (age 9.4 +/- 1.7 years) or a control group (age 10.0 +/- 1.3 years). The activity groups participated in a supervised summer camp for 6 h/day, 5 days/week including a discontinuous play-based physical activity program and a healthy lifestyle, while the control group were told to keep their regular summer break routines.

Anthropometrics, pulse wave velocity, augmentation index, blood pressure and peak oxygen consumption were evaluated before and after the intervention. RESULTS: Normalized augmentation index (75 beats/min) significantly decreased after 4 and 8 weeks in the active groups ( $p = 0.04$ ) while pulse wave velocity showed no significant changes in all groups. Mean arterial pressure decreased ( $p = 0.003$ ) and peak oxygen consumption increased ( $p = 0.001$ ) significantly in the 8 week group. CONCLUSION: These data suggest that 8 weeks of supervised play-based activity yield several cardio-beneficial results in adolescents, which may act as a clinical prophylaxis throughout their lifetime. 2012 The Author(s)/Acta Paediatrica 2012 Foundation Acta Paediatrica SN - 1651-2227

AD - University of Rome Foro Italico, Rome, Italy

UR - 23062246

ER -

TY - JOUR

ID - 141

T1 - Doll play narratives about starting school in children of socially anxious mothers, and their relation to subsequent child school-based anxiety

A1 - Pass,L.

A1 - Arteche,A.

A1 - Cooper,P.

A1 - Creswell,C.

A1 - Murray,L.

Y1 - 2012/11//

N1 - Pass, Laura. Arteche, Adriane. Cooper, Peter. Creswell, Cathy. Murray, Lynne

Journal of abnormal child psychology

0364547, h33

IM

Journal Article. Research Support, Non-U.S. Gov't

English

KW - Medline

KW - Adult

KW - Anxiety Disorders/px [Psychology]

KW - Child of Impaired Parents

KW - Child

KW - Preschool

KW - Depression

KW - Female

KW - Forecasting

KW - Humans

KW - Longitudinal Studies

KW - Male

KW - Mother-Child Relations

KW - Narration

KW - Play and Playthings

KW - Schools

KW - Social Behavior

KW - Students

RP - NOT IN FILE

SP - 1375

EP - 1384

JF - Journal of Abnormal Child Psychology

JA - J Abnorm.Child Psychol.

VL - 40

IS - 8

CY - United States

N2 - Child social anxiety is common, and predicts later emotional and academic impairment. Offspring of socially anxious mothers are at increased risk. It is important to establish whether individual vulnerability to disorder can be identified in young children. The responses of 4.5 year-old children of mothers with social phobia (N=62) and non-anxious mothers (N=60) were compared, two months before school entry, using a Doll Play (DP) procedure focused on the social challenge of starting school. DP responses were examined in relation to teacher reports of anxious-depressed symptoms and social worries at the end of the child's first school term. The role of earlier child behavioral inhibition and attachment, assessed at 14 months, was also considered. Compared to children of non-anxious mothers, children of mothers with social phobia were significantly more likely to give anxiously negative responses in their school DP (OR=2.57). In turn, negative DP predicted teacher reported anxious-depressed and social worry problems. There were no effects of infant behavioral inhibition or attachment. Vulnerability in young children at risk of anxiety can be identified using Doll Play narratives

SN - 1573-2835

AD - Winnicott Research Unit, School of Psychology, University of Reading, Reading, West Berkshire, RG6 6AL, UK

UR - 22588362

ER -

TY - JOUR

ID - 142

T1 - Prevalences of overweight and obesity and their association with physical activity pattern among Iranian adolescents aged 12-17 years

A1 - Hajian-Tilaki,K.

A1 - Heidari,B.

Y1 - 2012/12//

N1 - Hajian-Tilaki, Karimollah. Heidari, Behzad

Public health nutrition

9808463, dgy

IM

Journal Article. Research Support, Non-U.S. Gov't

English

KW - Medline

KW - Adolescent

KW - Adolescent Behavior

KW - Child

KW - Computers

KW - Cross-Sectional Studies

KW - Exercise

KW - Female

KW - Health Behavior

KW - Humans

KW - Iran/ep [Epidemiology]

KW - Leisure Activities

KW - Male

KW - Obesity/ep [Epidemiology]

KW - Overweight/ep [Epidemiology]

KW - Play and Playthings

KW - Prevalence

KW - Schools

KW - Sedentary Lifestyle

KW - Sex Factors

KW - Sports

RP - NOT IN FILE

SP - 2246

EP - 2252

JF - Public Health Nutrition

JA - Public Health Nutr

VL - 15

IS - 12

CY - England

N2 - **OBJECTIVE:** The objective of the present study was to investigate the prevalences of overweight and obesity and their association with physical activity pattern among adolescents in northern Iran. **DESIGN:** A cross-sectional study. **SETTING:** Babol, northern Iran. **SUBJECTS:** A representative sample of 1200 adolescents aged 12-17 years was recruited. All selected adolescents were interviewed, their leisure-time and sport physical activities were collected by a standard Baecke questionnaire and their height and weight were measured by standard methods. The diagnosis of overweight and obesity was determined by comparing BMI values with the BMI index for age and sex percentiles set by the US Centers for Disease Control and Prevention in 2000. **RESULTS:** The prevalences of overweight and obesity were 15.1 % and 8.3 %, respectively. The proportion of obesity was significantly higher in boys than in girls (10.2 % v. 6.5 %,  $P = 0.028$ ). Overall, the levels of high, moderate and low leisure-time physical activity were 2.9 %, 79.4 % and 17.7 %, respectively. The corresponding levels of high, moderate and low sport physical activity were 17.4 %, 75.2 % and 7.4 %. The levels of leisure-time and sport physical activities were significantly higher among the boys than the girls ( $P < 0.001$ ). There was also a significant association of studying in private schools and playing computer games with overweight/obesity ( $P < 0.001$ ). Moderate leisure-time physical activity was unexpectedly associated with a greater risk of overweight/obesity compared with the low level ( $P = 0.002$ ). **CONCLUSIONS:** The findings indicate a high prevalence of overweight/obesity in these Iranian adolescents, particularly the boys. The influence of physical activity and diet on overweight/obesity requires further prospective studies

SN - 1475-2727

AD - Department of Social Medicine and Health, Babol University of Medical Sciences, Babol, Islamic Republic of Iran. drhajian@yahoo.com

UR - 22578771

ER -

TY - JOUR

ID - 143

T1 - Outdoor play among children in relation to neighborhood characteristics: a cross-sectional neighborhood observation study

A1 - Aarts,M.J.

A1 - de Vries,S.I.

A1 - van Oers,H.A.

A1 - Schuit,A.J.

Y1 - 2012///

N1 - Aarts, Marie-Jeanne. de Vries, Sanne I. van Oers, Hans Am. Schuit, Albertine J

The international journal of behavioral nutrition and physical activity

101217089

IM

Journal Article. Research Support, Non-U.S. Gov't

English

KW - Medline

KW - Child

KW - Preschool  
 KW - Cross-Sectional Studies  
 KW - Environment Design  
 KW - Evaluation Studies as Topic  
 KW - Female  
 KW - Humans  
 KW - Male  
 KW - Motor Activity  
 KW - Multivariate Analysis  
 KW - Netherlands  
 KW - Parents  
 KW - Play and Playthings  
 KW - Questionnaires  
 KW - Residence Characteristics  
 KW - Safety  
 RP - NOT IN FILE  
 SP - 98  
 JF - International Journal of Behavioral Nutrition & Physical Activity  
 JA - Int.  
 VL - 9

CY - England  
 N2 - **BACKGROUND:** Although environmental characteristics as perceived by parents are known to be related to children's outdoor play behavior, less is known about the relation between independently measured neighborhood characteristics and outdoor play among children. The purpose of this study was to identify quantitative as well as qualitative neighborhood characteristics related to outdoor play by means of neighborhood observations. **METHODS:** Questionnaires including questions on outdoor play behavior of the child were distributed among 3,651 parents of primary school children (aged 4-12 years). Furthermore, neighborhood observations were conducted in 33 Dutch neighborhoods to map neighborhood characteristics such as buildings, formal outdoor play facilities, public space, street pattern, traffic safety, social neighborhood characteristics, and general impression. Data of the questionnaires and the neighborhood observations were coupled via postal code of the respondents. Multilevel GEE analyses were performed to quantify the correlation between outdoor play and independently measured neighborhood characteristics. **RESULTS:** Parental education was negatively associated with outdoor play among children. Neither the presence nor the overall quality of formal outdoor play facilities were (positively) related to outdoor play among children in this study. Rather, informal play areas such as the presence of sidewalks were related to children's outdoor play. Also, traffic safety was an important characteristic associated with outdoor play. **CONCLUSIONS:** This study showed that, apart from individual factors such as parental education level, certain modifiable characteristics in the neighborhood environment (as measured by neighborhood observations) were associated with outdoor play among boys and girls of different age groups in The Netherlands. Local policy makers from different sectors can use these research findings in creating more activity-friendly neighborhoods for children

SN - 1479-5868

AD - Department Tranzo, Scientific Center for Care and Welfare, Tilburg University, Tilburg, The Netherlands. mj.aarts@maastrichtuniversity.nl

UR - 22901102

ER -

TY - JOUR

ID - 144

T1 - Playground safety and quality in chicago

A1 - Allen,E.M.

A1 - Hill,A.L.

A1 - Tranter,E.

A1 - Sheehan,K.M.

Y1 - 2013/02//

N1 - Allen, Erin M. Hill, Amy L. Tranter, Erma. Sheehan, Karen M Pediatrics

oxv, 0376422

AIM, IM

Journal Article. Research Support, Non-U.S. Gov't

English

KW - Medline

KW - Accidental Falls/pc [Prevention &amp; Control]

KW - Chicago

KW - Child

KW - Preschool

KW - Cross-Sectional Studies

KW - Equipment Design/st [Standards]

KW - Female

KW - Health Surveys

KW - Humans

KW - Infant

KW - Newborn

KW - Male

KW - Motor Activity

KW - Play and Playthings/in [Injuries]

KW - Public Sector

KW - Safety/st [Standards]

KW - Social Environment

KW - Socioeconomic Factors

KW - Wounds and Injuries/ep [Epidemiology]

KW - Wounds and Injuries/pc [Prevention &amp; Control]

RP - NOT IN FILE

SP - 233

EP - 241

JA - Pediatrics

VL - 131

IS - 2

CY - United States

**N2 - OBJECTIVES:** To assess playground safety and quality in Chicago, Illinois, identify disparities in access, and use the data to inform collaborative improvement. **METHODS:** A cross-sectional survey of public park playgrounds in Chicago, Illinois, was conducted in 2009, 2010, and 2011 by using the National Program for Playground Safety Standardized Survey. All playgrounds were surveyed in 2009 and 2010; those that failed in 2010 were resurveyed in 2011. Playground assessments were in 4 main categories: age-appropriate design, fall surfacing, equipment maintenance, and physical environment. Safety scores were generated from the assessment. Geographic information system mapping provided a visual description of the playground pass/fail rate based on neighborhood, child population, race/ethnicity, and poverty level. **RESULTS:** Of the ~500 playgrounds, 467 were assessed in 2009, and 459 were assessed in 2010. In 2009, half of all playgrounds (55%) and in 2010, nearly two-thirds (61%) earned scores consistent with safe playgrounds ( $P < .001$ ). Playground scores scored poorest in fall surfacing and equipment maintenance. Geographic information system mapping showed neighborhoods with a higher percentage of children and impoverished families had fewer playgrounds and more failing playgrounds. In 2011, 154 (85%) of the playgrounds that failed in 2010 were surveyed. The mean playground score among failing playgrounds improved significantly between 2010 (61%) and 2011 (67%,  $P < .001$ ). **CONCLUSIONS:** Since the playground improvement initiative began in 2009, considerable progress has been made in the safety scores, although access to high-quality playgrounds varies by neighborhood. Many failing playgrounds can be brought up to standard with improvement in fall surfacing and equipment maintenance

SN - 1098-4275

AD - Baylor College of Medicine, 3925 Fairmont Parkway, Pasadena, TX 77504, USA. emallen@bcm.edu

UR - 23339221

ER -

TY - JOUR

ID - 146

T1 - Protecting children or creating vulnerability?

A1 - Hewitt-Taylor,J.

A1 - Heaslip,V.

Y1 - 2012/12//

N1 - Hewitt-Taylor, Jaqui. Heaslip, Vanessa

Community practitioner : the journal of the Community Practitioners' & Health Visitors' Association  
9809060

N

Journal Article

English

KW - Medline

KW - Child

KW - Child Welfare

KW - Community Health Nursing/mt [Methods]

KW - Harm Reduction

KW - Humans

KW - Nurse's Role

KW - Play and Playthings

KW - Risk-Taking

KW - Social Environment

KW - Vulnerable Populations

RP - NOT IN FILE

SP - 31

EP - 33

JF - Community Practitioner

JA - Community Pract

VL - 85

IS - 12

CY - England

N2 - Children are, rightly, viewed as vulnerable and in need of safeguarding. However, protecting children from harm should not eclipse their need to learn about managing risky situations and those in which they are vulnerable. How adults view risk and vulnerability will affect the way in which they enable children to learn through activities which carry a degree of risk. Community practitioners may be well placed to discuss with parents how the risk and benefit of various activities can be considered, and children enabled to learn and develop resilience through acceptable risk taking activities. This paper discusses the challenges which community practitioners may encounter when working with parents on enabling them to achieve a balance between risk and safety for their children. It presents some key concepts and perspectives which may assist them to facilitate discussions with children and families

SN - 1462-2815

AD - School of Health and Social Care, Bournemouth University. jhtaylor@bournemouth.ac.uk

UR - 23304892

ER -

TY - JOUR

ID - 147

T1 - Randomized trial of a peer resistance skill-building game for Hispanic early adolescent girls

A1 - Norris,A.E.

A1 - Hughes,C.

A1 - Hecht,M.

A1 - Peragallo,N.

A1 - Nickerson,D.

Y1 - 2013/01//

N1 - Norris, Anne E. Hughes, Charles. Hecht, Michael. Peragallo, Nilda. Nickerson, David

Nursing research

o9k, 0376404



AIM, IM, N

Journal Article. Randomized Controlled Trial. Research Support, N.I.H., Extramural. Research Support, Non-U.S. Gov't

English

KW - Medline

KW - Adaptation

KW - Psychological

KW - Adolescent

KW - Adolescent Behavior/px [Psychology]

KW - Child

KW - Feasibility Studies

KW - Female

KW - Hispanic Americans/px [Psychology]

KW - Humans

KW - Interpersonal Relations

KW - Peer Group

KW - Risk-Taking

KW - Role Playing

KW - Self Efficacy

KW - Sex Factors

KW - Video Games/px [Psychology]

RP - NOT IN FILE

SP - 25

EP - 35

JF - Nursing Research

JA - Nurs Res.

VL - 62

IS - 1

CY - United States

N2 - **BACKGROUND:** Adolescents can use peer resistance skills to avoid being pressured into risky behavior, such as early sexual behavior. Avatar-based virtual reality technology offers a novel way to help build these skills. **OBJECTIVES:** The aims of this study were to evaluate the feasibility of an avatar-based virtual reality peer resistance skill building game (DRAMA-RAMA), to explore the impact of game play on peer resistance self-efficacy, and to assess how positively the game was perceived. **METHODS:** Forty-four low-income early adolescent Hispanic girls were assigned randomly to either the intervention (DRAMA-RAMA) or attention control game (Wii Dancing With the Stars) condition. All participants were offered a five-session curriculum that included peer resistance skill content before playing their respective game for 15 minutes, once a week, for 2 weeks. Participants completed electronic surveys at baseline, after game play, and at 2 months to assess demographics, peer resistance self-efficacy, and sexual behavior. They also completed a paper-pencil game experience questionnaire immediately after game play. Data were analyzed using descriptive statistics, t test, chi-square, and analyses of covariance. **RESULTS:** Separate analyses of covariance showed a significant game effect at posttest for the peer resistance self-efficacy measure ( $F = 4.21, p < .05$ ), but not at follow-up ( $F = 0.01, p = .92$ ). DRAMA-RAMA was rated as positively as the Wii Dancing With the Stars ( $p > .26$ ). **DISCUSSION:** This randomized control trial provides preliminary support for the hypothesis that playing an avatar-based virtual reality technology game can strengthen peer resistance skills, and early adolescent Hispanic girls will have a positive response to this game

SN - 1538-9847

AD - College of Nursing, University of Central Florida, Orlando, FL 32826, USA. Anne.Norris@ucf.edu

UR - 23150043

ER -

TY - JOUR

ID - 148

T1 - Concussions in soccer: a current understanding

A1 - Levy,M.L.

A1 - Kasasbeh,A.S.

A1 - Baird,L.C.

A1 - Amene,C.

A1 - Skeen,J.

A1 - Marshall,L.

Y1 - 2012/11//

N1 - Levy, Michael L. Kasasbeh, Aimen S. Baird, Lissa Catherine. Amene, Chiazoo. Skeen, Jeff. Marshall, Larry

World neurosurgery

101528275

IM

Journal Article

English

KW - Medline

KW - Adolescent

KW - Adult

KW - Athletic Injuries/ep [Epidemiology]

KW - Athletic Injuries/pc [Prevention & Control]

KW - Brain Concussion/ep [Epidemiology]

KW - Brain Concussion/pc [Prevention & Control]

KW - Child

KW - Cognition Disorders/ep [Epidemiology]

KW - Cognition Disorders/pc [Prevention & Control]

KW - Female

KW - Head Protective Devices

KW - Humans

KW - Incidence

KW - Male

KW - Recovery of Function

KW - Risk Factors

KW - Soccer/in [Injuries]

KW - Soccer/sn [Statistics & Numerical Data]

KW - United States/ep [Epidemiology]

KW - Young Adult

RP - NOT IN FILE

SP - 535

EP - 544

JF - World Neurosurgery

JA - World Neurosurg.

VL - 78

IS - 5

CY - United States

N2 - OBJECTIVE: Traumatic brain injury (TBI) is a significant public health problem in the United States, with approximately 1.5-2 million TBIs occurring each year. However, it is believed that these figures underestimate the true toll of TBI. Soccer is the most popular sport in the world and has a following of millions in the United States. Soccer is a sport not traditionally identified as high-risk for concussions, yet several studies have shown that concussion rates in soccer are comparable to, and often exceed those of, other contact sports. As many as 22% of all soccer injuries are concussions. METHODS: Soccer is a sport not traditionally identified as high risk for concussions, yet several studies have shown that concussion rates in soccer are comparable to, and often exceed those of, other contact sports. As many as 22% of all soccer injuries are concussions. Head injury during soccer is usually the result of either "direct contact" or contact with the ball while "heading" the ball. Relationships between the number of headers sustained in a single season and the degree of cognitive impairment (attention and visual/verbal memory) have been demonstrated. It is also likely that multiple concussions may cause cumulative neuropsychologic impairment in soccer players. RESULTS: Although our understanding of risk factors for sports-related concussions is far from complete, there is great potential for prevention in sports-related concussions. Several measures must be taken to avert the development of concussions in soccer and, when they take place, reduce their effects. These include the development and testing

of effective equipment during play, the maintenance of regulatory standards for all such equipment, educating young athletes on the safe and appropriate techniques used during play, and strict adherence to the rules of competition. CONCLUSIONS: In spite of such preventive measures, concussions in soccer will continue to occur. Considering the frequency of concussions in soccer, the serious sequelae of these concussions, and because almost half of concussed soccer players were noncompliant with recommended American Academy of Neurology return-to-play guidelines, further measures must be taken to protect players, in addition to understanding those criteria that result in removing an injured player from competition and the steps by which to safely return an athlete to competition after injury. Copyright 2012 Elsevier Inc. All rights reserved

SN - 1878-8750

AD - Division of Pediatric Neurosurgery Rady Children's Hospital of San Diego, San Diego, CA, USA.

mlevy@rchsd.org

UR - 22120567

ER -

TY - JOUR

ID - 149

T1 - What role does nutrition play in the prevention or treatment of childhood lead poisoning?

A1 - Cunningham,E.

Y1 - 2012/11//

N1 - Cunningham, Eleese

Journal of the Academy of Nutrition and Dietetics

101573920

AIM, IM

Journal Article

English

KW - Medline

KW - Child

KW - Preschool

KW - Drinking Water/ch [Chemistry]

KW - Environmental Exposure/ae [Adverse Effects]

KW - Female

KW - Food Contamination/pc [Prevention & Control]

KW - Health Policy

KW - Humans

KW - Infant

KW - Lead/ad [Administration & Dosage]

KW - Lead/bl [Blood]

KW - Lead Poisoning/pc [Prevention & Control]

KW - Lead Poisoning

KW - Nervous System

KW - Childhood/pc [Prevention & Control]

KW - Male

KW - Nutritional Status

KW - Primary Prevention/mt [Methods]

KW - Risk Assessment

KW - Risk Factors

KW - United States

RP - NOT IN FILE

SP - 1916

JF - Journal of the Academy of Nutrition & Dietetics

JA - J Acad.Nutr Diet

VL - 112

IS - 11

CY - United States

SN - 2212-2672

AD - Academy of Nutrition and Dietetics' Knowledge Center Team. Chicago, IL, USA

UR - 23102188

ER -

TY - JOUR

ID - 150

T1 - Trampoline safety in childhood and adolescence

A1 - Council on Sports Medicine and Fitness, American Academy of Pediatrics

A1 - Briskin, S.

A1 - LaBotz, M.

Y1 - 2012/10//

N1 - Council on Sports Medicine and Fitness, American Academy of Pediatrics. Briskin, Susannah. LaBotz, Michele

Pediatrics

oxv, 0376422

AIM, IM

Journal Article. Practice Guideline

English

KW - Medline

KW - Adolescent

KW - Athletic Injuries/ep [Epidemiology]

KW - Athletic Injuries/pc [Prevention & Control]

KW - Child

KW - Humans

KW - Play and Playthings/in [Injuries]

KW - Safety

KW - Sports Equipment/ae [Adverse Effects]

KW - United States/ep [Epidemiology]

RP - NOT IN FILE

SP - 774

EP - 779

JA - Pediatrics

VL - 130

IS - 4

CY - United States

N2 - Despite previous recommendations from the American Academy of Pediatrics discouraging home use of trampolines, recreational use of trampolines in the home setting continues to be a popular activity among children and adolescents. This policy statement is an update to previous statements, reflecting the current literature on prevalence, patterns, and mechanisms of trampoline-related injuries. Most trampoline injuries occur with multiple simultaneous users on the mat. Cervical spine injuries often occur with falls off the trampoline or with attempts at somersaults or flips. Studies on the efficacy of trampoline safety measures are reviewed, and although there is a paucity of data, current implementation of safety measures have not appeared to mitigate risk substantially. Therefore, the home use of trampolines is strongly discouraged. The role of trampoline as a competitive sport and in structured training settings is reviewed, and recommendations for enhancing safety in these environments are made

SN - 1098-4275

UR - 23008455

ER -

TY - JOUR

ID - 151

T1 - The effects of a responsive parenting intervention on parent-child interactions during shared book reading

A1 - Landry, S.H.

A1 - Smith, K.E.

A1 - Swank, P.R.

A1 - Zucker, T.

A1 - Crawford, A.D.

A1 - Solari,E.F.

Y1 - 2012/07//

N1 - Landry, Susan H. Smith, Karen E. Swank, Paul R. Zucker, Tricia. Crawford, April D. Solari, Emily F  
Developmental psychology

0260564, cn8

IM

Journal Article. Randomized Controlled Trial

English

KW - Medline

KW - Attention

KW - Books

KW - Child Behavior

KW - Child Development

KW - Child Language

KW - Child

KW - Preschool

KW - Cooperative Behavior

KW - Education/mt [Methods]

KW - Female

KW - Humans

KW - Male

KW - Mother-Child Relations

KW - Reading

KW - Statistics as Topic

RP - NOT IN FILE

SP - 969

EP - 986

JF - Developmental Psychology

JA - Dev.Psychol.

VL - 48

IS - 4

CY - United States

N2 - This study examined mother-child shared book reading behaviors before and after participation in a random-assignment responsive parenting intervention called Play and Learning Strategies (PALS) that occurred during infancy (PALS I), the toddler-preschool (PALS II) period, or both as compared with a developmental assessment (DAS) intervention (DAS I and/or II). The efficacy of PALS was previously demonstrated for improving mother and child behaviors within play contexts, everyday activities, and standardized measures of child language. We hypothesized that PALS effects would generalize to influence maternal and child behaviors during a shared reading task even though this situation was not a specific focus of the intervention and that this would be similar for children who varied in biological risk. Participation in at least PALS II was expected to have a positive effect due to children's increased capacity to engage in book reading at this age. Four groups of randomized mothers and their children (PALS I-II, PALS I-DAS II, DAS I-PALS II, DAS I-II) were observed in shared reading interactions during the toddler-preschool period and coded for (a) mother's affective and cognitive-linguistic supports and (b) child's responses to maternal requests and initiations. Support was found for significant changes in observed maternal and child behaviors, and evidence of mediation was found for the intervention to affect children's behaviors through change in maternal responsiveness behaviors. These results add to other studies supporting the importance of targeting a broad range of responsive behaviors across theoretical frameworks in interventions to facilitate children's development

SN - 1939-0599

AD - Children's Learning Institute, University of Texas Health Science Center, 7000 Fannin, Suite 2300,  
Houston, TX 77030, USA.susan.landry@uth.tmc.edu

UR - 22122475

ER -

TY - JOUR

ID - 152

T1 - Supporting vocationally oriented learning in the high school years: rationale, tasks, challenges

A1 - Halpern,R.

Y1 - 2012/10//

N1 - Halpern, Robert

New directions for youth development

101090644

IM

Journal Article

English

KW - Medline

KW - Child

KW - Child Development

KW - Humans

KW - Learning

KW - Risk Factors

KW - Role

KW - Schools/og [Organization & Administration]

KW - Schools

KW - United States

KW - Vocational Education/mt [Methods]

KW - Vocational Education/og [Organization & Administration]

KW - Vocational Education

RP - NOT IN FILE

SP - 85

EP - 106

JF - New Directions for Youth Development

JA - New Dir.Youth Dev.

VL - 2012

IS - 134

CY - United States

N2 - This article highlights the limitations of our current educational system in terms of vocational learning and highlights the role that vocational learning can play in supporting youth development and improving youth outcomes. It discusses the role that nonschool settings can play in supporting vocational learning and suggests strategies to improve our in-school and out-of-school systems to build a more coherent whole that promotes youth development across various settings. Copyright 2012 Wiley Periodicals, Inc., A Wiley Company

SN - 1537-5781

AD - Research Council, Erikson Institute in Chicago, USA

UR - 22826169

ER -

TY - JOUR

ID - 153

T1 - Evaluation of a coping kit for children with challenging behaviors in a pediatric hospital

A1 - Drake,J.

A1 - Johnson,N.

A1 - Stoneck,A.V.

A1 - Martinez,D.M.

A1 - Massey,M.

Y1 - 2012/07//

N1 - Drake, Jennifer. Johnson, Norah. Stoneck, Alice V. Martinez, Deb M. Massey, Megan

Pediatric nursing

oun, 7505804

N

Evaluation Studies. Journal Article

English

KW - Medline

KW - Adaptation  
 KW - Psychological  
 KW - Anxiety Disorders/px [Psychology]  
 KW - Anxiety Disorders/th [Therapy]  
 KW - Child  
 KW - Hospitalized/px [Psychology]  
 KW - Cross-Sectional Studies  
 KW - Disabled Children/px [Psychology]  
 KW - Female  
 KW - Hospitals  
 KW - Pediatric  
 KW - Humans  
 KW - Male  
 KW - Midwestern United States  
 KW - Pediatric Nursing/mt [Methods]  
 KW - Play and Playthings  
 RP - NOT IN FILE  
 SP - 215  
 EP - 221  
 JF - Pediatric Nursing  
 JA - Pediatr Nurs  
 VL - 38  
 IS - 4  
 CY - United States  
 N2 - This study attempted to answer the question, "Do nurses perceive coping kits to be effective at meeting the needs of hospitalized children with developmental disabilities who are at increased risk for challenging behaviors?" A cross-sectional post-test survey study design was used, with a convenience sample of 24 registered nurses at a Midwestern free-standing children's hospital. A coping kit with simple communication cards, social script book, and distraction items (toys) was developed to enhance communication and distract children with developmental disabilities (including autism spectrum disorder) undergoing procedures in the hospital. A modified version of Hudson's (2006) intervention effectiveness survey was used to measure the nurse's perception of the effectiveness of the coping kit. Nurses perceived the coping kits to be effective for decreasing their patient's anxiety, calming the child's behavior, and increasing cooperation during procedures. The nurse can develop a plan of care that includes a coping kit to help gain cooperation with the hospitalized child with challenging behaviors  
 SN - 0097-9805  
 AD - Children's Hospital of Wisconsin, Milwaukee, WI, USA  
 UR - 22970487  
 ER -  
  
 TY - JOUR  
 ID - 154  
 T1 - Home environment relationships with children's physical activity, sedentary time, and screen time by socioeconomic status  
 A1 - Tandon,P.S.  
 A1 - Zhou,C.  
 A1 - Sallis,J.F.  
 A1 - Cain,K.L.  
 A1 - Frank,L.D.  
 A1 - Saelens,B.E.  
 Y1 - 2012///  
 N1 - Tandon, Pooja S. Zhou, Chuan. Sallis, James F. Cain, Kelli L. Frank, Lawrence D. Saelens, Brian E  
 The international journal of behavioral nutrition and physical activity  
 101217089  
 IM

Comparative Study. Journal Article. Research Support, N.I.H., Extramural. Research Support, Non-U.S. Gov't  
English

KW - Medline

KW - Adult

KW - Bicycling

KW - Child

KW - Child Behavior

KW - Data Collection

KW - Educational Status

KW - Environment

KW - Exercise

KW - Female

KW - Health Behavior

KW - Humans

KW - Income

KW - Male

KW - Middle Aged

KW - Movement

KW - Obesity/et [Etiology]

KW - Parent-Child Relations

KW - Parenting

KW - Parents

KW - Play and Playthings

KW - Sedentary Lifestyle

KW - Social Class

KW - Social Environment

KW - Television

KW - Video Games

RP - NOT IN FILE

SP - 88

JF - International Journal of Behavioral Nutrition & Physical Activity

JA - Int.

VL - 9

CY - England

N2 - **BACKGROUND:** Children in households of lower socioeconomic status (SES) are more likely to be overweight/obese. We aimed to determine if home physical activity (PA) environments differed by SES and to explore home environment mediators of the relation of family SES to children's PA and sedentary behavior. **METHODS:** Participants were 715 children aged 6 to 11 from the Neighborhood Impact on Kids (NIK) Study. Household SES was examined using highest educational attainment and income. Home environment was measured by parent report on a survey. Outcomes were child's accelerometer-measured PA and parent-reported screen time. Mediation analyses were conducted for home environment factors that varied by SES. **RESULTS:** Children from lower income households had greater media access in their bedrooms (TV 52% vs. 14%, DVD player 39% vs. 14%, video games 21% vs. 9%) but lower access to portable play equipment (bikes 85% vs. 98%, jump ropes 69% vs. 83%) compared to higher income children. Lower SES families had more restrictive rules about PA (2.5 vs. 2.0). Across SES, children watched TV/DVDs with parents/siblings more often than they engaged in PA with them. Parents of lower SES watched TV/DVDs with their children more often (3.1 vs. 2.5 days/week). Neither total daily and home-based MVPA nor sedentary time differed by SES. Children's daily screen time varied from 1.7 hours/day in high SES to 2.4 in low SES families. Media in the bedroom was related to screen time, and screen time with parents was a mediator of the SES--screen time relationship. **CONCLUSIONS:** Lower SES home environments provided more opportunities for sedentary behavior and fewer for PA. Removing electronic media from children's bedrooms has the potential to reduce disparities in chronic disease risk

SN - 1479-5868

AD - Seattle Children's Research Institute, M/S CW8-6, P.O, Box 5371, Seattle, WA 98145-5005, USA.

pooja@uw.edu

UR - 22835155



ER -

TY - JOUR

ID - 155

T1 - Risk factors predisposing to pedestrian road traffic injury in children living in Lima, Peru: a case-control study

A1 - Pernica, J.M.

A1 - LeBlanc, J.C.

A1 - Soto-Castellares, G.

A1 - Donroe, J.

A1 - Carhuancho-Meza, B.A.

A1 - Rainham, D.G.

A1 - Gilman, R.H.

Y1 - 2012/08//

N1 - Pernica, Jeffrey M. LeBlanc, John C. Soto-Castellares, Giselle. Donroe, Joseph. Carhuancho-Meza, Bristan A. Rainham, Daniel G C. Gilman, Robert H

Archives of disease in childhood

6xg, 0372434

AIM, IM

Journal Article. Research Support, Non-U.S. Gov't

English

KW - Medline

KW - Accidents

KW - Traffic/sn [Statistics &amp; Numerical Data]

KW - Case-Control Studies

KW - Child

KW - Family

KW - Female

KW - Humans

KW - Male

KW - Peru/ep [Epidemiology]

KW - Recreation

KW - Risk Factors

KW - Schools

KW - Walking/in [Injuries]

KW - Wounds and Injuries/ep [Epidemiology]

RP - NOT IN FILE

SP - 709

EP - 713

JF - Archives of Disease in Childhood

JA - Arch.Dis.Child

VL - 97

IS - 8

CY - England

N2 - OBJECTIVE: To describe the epidemiology of pedestrian road traffic injury in Lima and to identify associated child-level, family-level, and school travel-related variables. DESIGN: Case-control study.

SETTING: The Instituto Nacional de Salud del Niño, the largest paediatric hospital in the city.

PARTICIPANTS: Cases were children who presented because of pedestrian road traffic injury. Controls presented with other diagnoses and were matched on age, sex and severity of injury. RESULTS: Low

socioeconomic status, low paternal education, traffic exposure during the trip to school, lack of supervision during outside play, and duration of outside play were all statistically significantly associated with case-control status. In multivariate logistic regression, a model combining the lack of supervision during outside play and the number of the streets crossed walking to school best predicted case-control status ( $p < 0.001$ ). CONCLUSIONS:

These results emphasise that an assessment of children's play behaviours and school locations should be considered and integrated into any plan for an intervention designed to reduce pedestrian road traffic injury. A

child-centred approach will ensure that children derive maximum benefit from sorely needed public health interventions

SN - 1468-2044

AD - Department of Pediatrics, McMaster University, Hamilton, Canada

UR - 22685050

ER -

TY - JOUR

ID - 156

T1 - Behavioral risk factors for overweight in early childhood; the 'Be active, eat right' study

A1 - Veldhuis,L.

A1 - Vogel,I.

A1 - Renders,C.M.

A1 - van,Rossem L.

A1 - Oenema,A.

A1 - HiraSing,R.A.

A1 - Raat,H.

Y1 - 2012///

N1 - Veldhuis, Lydian. Vogel, Ineke. Renders, Carry M. van Rossem, Lenie. Oenema, Anke. HiraSing, Remy A. Raat, Hein

The international journal of behavioral nutrition and physical activity

101217089

IM

Journal Article. Research Support, Non-U.S. Gov't

English

KW - Medline

KW - Beverages

KW - Child Behavior

KW - Child

KW - Preschool

KW - Confidence Intervals

KW - Cross-Sectional Studies

KW - Diet

KW - Dietary Sucrose/ad [Administration & Dosage]

KW - Exercise

KW - Feeding Behavior

KW - Female

KW - Health Behavior

KW - Humans

KW - Male

KW - Obesity/et [Etiology]

KW - Odds Ratio

KW - Overweight

KW - Play and Playthings

KW - Risk Factors

KW - Risk-Taking

KW - Sedentary Lifestyle

KW - Television

RP - NOT IN FILE

SP - 74

JF - International Journal of Behavioral Nutrition & Physical Activity

JA - Int.

VL - 9

CY - England

N2 - BACKGROUND: The lifestyle-related behaviors having breakfast, drinking sweet beverages, playing outside and watching TV have been indicated to have an association with childhood overweight, but research

among young children (below 6 years old) is limited. The aim of the present study was to assess the associations between these four behaviors and overweight among young children. **METHODS:** This cross-sectional study used baseline data on 5-year-old children (n = 7505) collected for the study 'Be active, eat right'. Age and sex-specific cut-off points for body mass index of the International Obesity Task Force were used to assess overweight/obesity. Multivariable logistic regression analyses were applied. **RESULTS:** For children who had breakfast <7 days/week and watched TV >2 hours/day, the odds ratio (OR) for having overweight (obesity included) was, respectively, 1.49 (95% confidence interval (CI): 1.13-1.95), and 1.25 (95% CI: 1.03-1.51). There was a positive association between the number of risk behaviors present and the risk for having overweight. For children with 3 or all of the risk behaviors having breakfast <7 days/week, drinking sweet beverages >2 glasses/day, playing outside <1 h/day, watching TV >2 hs/day, the OR for overweight was 1.73 (95% CI: 1.11-2.71) (all models adjusted for children's sex and sociodemographic characteristics). **CONCLUSION:** Given the positive association between the number of behavioral risk factors and overweight, further studies are needed to evaluate the effectiveness of behavioral counseling of parents of toddlers in preventing childhood overweight. In the meantime we recommend physicians to target all four behaviors for counseling during well-child visits

SN - 1479-5868

AD - Department of Public Health, Erasmus MC-University Medical Centre Rotterdam, Rotterdam, The Netherlands. l.veldhuis@erasmusmc.nl

UR - 22704042

ER -

TY - JOUR

ID - 157

T1 - Combined influence of media use on subjective health in elementary school children in Japan: a population-based study

A1 - Nakamura,H.

A1 - Ohara,K.

A1 - Kouda,K.

A1 - Fujita,Y.

A1 - Mase,T.

A1 - Miyawaki,C.

A1 - Okita,Y.

A1 - Ishikawa,T.

Y1 - 2012///

N1 - Nakamura, Harunobu. Ohara, Kumiko. Kouda, Katsuyasu. Fujita, Yuki. Mase, Tomoki. Miyawaki, Chiemi. Okita, Yoshimitsu. Ishikawa, Tetsuya

BMC public health

100968562

IM

Journal Article

English

KW - Medline

KW - Child

KW - Choice Behavior

KW - Computers/ut [Utilization]

KW - Cross-Sectional Studies

KW - Female

KW - Food Habits/px [Psychology]

KW - Health Status Indicators

KW - Humans

KW - Japan

KW - Logistic Models

KW - Male

KW - Mass Media/ut [Utilization]

KW - Play and Playthings/px [Psychology]

KW - Population Surveillance

KW - Psychophysiologic Disorders/et [Etiology]

KW - Quality of Life

KW - Questionnaires

KW - Risk Factors

KW - Schools

KW - Sedentary Lifestyle

KW - Sleep/ph [Physiology]

KW - Students/px [Psychology]

KW - Students/sn [Statistics & Numerical Data]

KW - Television/ut [Utilization]

KW - Time Factors

KW - Walking/ph [Physiology]

KW - Walking/px [Psychology]

RP - NOT IN FILE

SP - 432

JA - BMC Public Health

VL - 12

CY - England

N2 - BACKGROUND: In recent years in Japan, electronic games, home computers, and the internet have assumed an important place in people's lives, even for elementary school children. Subjective health complaints have also become a problem among children. In the present study, we investigated the relationship between media use and health status in elementary school children in Japan. METHODS: A cross-sectional school-based population survey was conducted in 2009 with a sample of fourth-, fifth-, and sixth-grade children (age range: 10-12years old) in elementary schools in Japan (n=3,464). Self-reported health, lifestyle habits, and time spent using media were assessed. RESULTS: The use of games, television, and personal computers was significantly associated with lifestyle ( $p<0.05$ ) and subjective health ( $p<0.05$ ). In addition, the use of games, the use of television, and the use of personal computers were mutually associated. The greater the number of media used for more than 1 hour was, the higher the odds ratio of the association of media use with unhealthy lifestyle and subjective health complaints was. The plural use of these media had stronger associations with unhealthy lifestyle and subjective health complaints. CONCLUSIONS: Game, television, and personal-computer use were mutually associated, and the plural use of these media had stronger associations with unhealthy lifestyle and subjective health complaints. Excessive use of media might be a risk for unhealthy lifestyle and subjective health complaints

SN - 1471-2458

AD - Graduate School of Human Development and Environment, Kobe University, 3-11 Tsurukabuto, Nada, Kobe, Japan. hal@kobe-u.ac.jp

UR - 22694807

ER -

TY - JOUR

ID - 158

T1 - Affective dynamics in triadic peer interactions in early childhood

A1 - Lavictoire,L.A.

A1 - Snyder,J.

A1 - Stoolmiller,M.

A1 - Hollenstein,T.

Y1 - 2012/07//

N1 - Lavictoire, Lindsay A. Snyder, James. Stoolmiller, Mike. Hollenstein, Tom

Nonlinear dynamics, psychology, and life sciences

9704130

IM

Journal Article

English

KW - Medline

KW - Affect

KW - Analysis of Variance

KW - Child  
 KW - Child Behavior/px [Psychology]  
 KW - Child Behavior Disorders/px [Psychology]  
 KW - Preschool  
 KW - Cohort Studies  
 KW - Female  
 KW - Humans  
 KW - Internal-External Control  
 KW - Interpersonal Relations  
 KW - Male  
 KW - Parent-Child Relations  
 KW - Peer Group  
 KW - Play and Playthings/px [Psychology]  
 KW - Socioeconomic Factors  
 RP - NOT IN FILE  
 SP - 293  
 EP - 312  
 JF - Nonlinear Dynamics, Psychology, & Life Sciences  
 JA - Nonlinear Dynamics Psychol.Life Sci  
 VL - 16  
 IS - 3  
 CY - United States  
 N2 - In interpersonal interaction research, moving beyond dyadic to triadic dynamics can be analytically daunting. We explored the affective states expressed during triadic peer interactions to understand how patterns were associated with childhood psychopathology and sociometric status. High-risk kindergarten children (N = 216) were observed in several groups of three during a free play task. We extended the state space grid technique to 3-dimensional analysis in order to derive variables of interest. Unlike results from parent-child dyadic interactions, triadic affective variability was not strongly associated with externalizing or internalizing problems. However, several triadic affective states were distinguished by externalizing, internalizing, and sociometric status, most commonly mutually aversive affect. Strengths and limitations of this methodology in relation to understanding peer triadic interactions are discussed  
 SN - 1090-0578  
 AD - Queen's University, Kingston, ON, Canada  
 UR - 22695150  
 ER -  
  
 TY - JOUR  
 ID - 159  
 T1 - Geographic variations in elementary school-based physical activity practices  
 A1 - Turner,L.  
 A1 - Chaloupka,F.J.  
 A1 - Slater,S.J.  
 Y1 - 2012/07//  
 N1 - Turner, Lindsey. Chaloupka, Frank J. Slater, Sandy J  
 The Journal of school health  
 k13, 0376370  
 IM, N  
 Journal Article  
 English  
 KW - Medline  
 KW - Child  
 KW - Data Collection  
 KW - Geography  
 KW - Health Promotion/mt [Methods]  
 KW - Health Promotion/sn [Statistics & Numerical Data]  
 KW - Humans

KW - Illinois  
 KW - Logistic Models  
 KW - Male  
 KW - Motor Activity/ph [Physiology]  
 KW - Physical Education and Training/sn [Statistics & Numerical Data]  
 KW - Play and Playthings  
 KW - Risk Factors  
 KW - School Health Services  
 KW - Schools  
 KW - Students  
 RP - NOT IN FILE  
 SP - 307  
 EP - 310  
 JF - Journal of School Health  
 JA - J Sch Health  
 VL - 82  
 IS - 7  
 CY - United States  
 N2 - BACKGROUND: Physical activity (PA) is associated with health and academic benefits among children, but many schools do not meet national recommendations. This study examined school-based PA practices in nationally representative samples of public elementary schools, and geographic variations in those practices. METHODS: Mail-back surveys were used to gather data from 578 public elementary schools during the 2006-2007 school year and 680 public elementary schools during the 2009-2010 school year. RESULTS: Nationwide, only 1 in 5 schools met the national recommendation of at least 150 minutes of physical education (PE) per week, although PE was more prevalent in the South. Nearly three-fourths of schools nationwide met recommendations for 20 or more minutes of recess daily, and this was more prevalent in the Midwest but less so in the South. Approximately 40% of schools offered sports and approximately 40% offered other opportunities for PA during the school day. The only practice that increased over time was formal classroom instruction on PA. CONCLUSIONS: There has been little change in elementary school-based PA practices nationwide in recent years. With the upcoming renewal of the Elementary and Secondary Education Act, policymakers have an important opportunity to promote increased PA in schools. 2012, American School Health Association  
 SN - 1746-1561  
 AD - Institute for Health Research and Policy, University of Illinois at Chicago, 1747 W. Roosevelt Road, M/C 275, Room 558, Chicago, IL 60608, USA. lindseyt@uic.edu  
 UR - 22671946  
 ER -  
  
 TY - JOUR  
 ID - 160  
 T1 - The road user behaviour of school students in Belgium  
 A1 - Sullman,M.J.  
 A1 - Thomas,A.  
 A1 - Stephens,A.N.  
 Y1 - 2012/09//  
 N1 - Sullman, Mark J M. Thomas, Abigail. Stephens, Amanda N  
 Accident; analysis and prevention  
 acs, 1254476  
 IM  
 Journal Article. Validation Studies  
 English  
 KW - Medline  
 KW - Accidents  
 KW - Traffic/pc [Prevention & Control]  
 KW - Traffic/px [Psychology]  
 KW - Traffic/sn [Statistics & Numerical Data]  
 KW - Adolescent

KW - Adolescent Behavior  
 KW - Age Factors  
 KW - Belgium  
 KW - Bicycling  
 KW - Child  
 KW - Dangerous Behavior  
 KW - Female  
 KW - Health Surveys  
 KW - Humans  
 KW - Male  
 KW - Play and Playthings  
 KW - Psychological Tests  
 KW - Questionnaires  
 KW - Risk Reduction Behavior  
 KW - Running  
 KW - Safety  
 KW - Self Report  
 KW - Sex Factors  
 KW - Walking

RP - NOT IN FILE

SP - 495

EP - 504

JF - Accident Analysis & Prevention

JA - Accid.Anal.Prev.

VL - 48

CY - England

N2 - The present study aimed to investigate both the on road behaviour of Belgian school students and the validity of the Adolescent Road User Behaviour Questionnaire (ARBQ) in a sample of students attending school in Belgium. In total, 294 adolescents completed the ARBQ along with measures of their self-reported accident involvement and sensation seeking behaviour. Confirmatory Factor Analysis supported the original factor structure of: "unsafe road crossing", "playing on the road" and "planned protective behaviour" for the 21-item version of the questionnaire, but not for the full scale. Males were found to engage more often in unsafe crossing behaviour and playing on the roads. There were also age differences, with unsafe road crossing increasing with age and engagement in planned protective behaviours improving with age. Those who reported being involved in an accident also reported more frequent engagement in unsafe crossing, playing on the roads, thrill seeking behaviour and lower levels of behaviour inhibition. Therefore, this study confirms that the ARBQ is a useful tool for investigating safety-related behaviours that contribute to accident involvement. Copyright 2012 Elsevier Ltd. All rights reserved

SN - 1879-2057

AD - Cranfield University, UK. M.Sullman@cranfield.ac.uk

UR - 22664716

ER -

TY - JOUR

ID - 161

T1 - Developmental Coordination Disorder, gender, and body weight: examining the impact of participation in active play

A1 - Cairney,J.

A1 - Kwan,M.Y.

A1 - Hay,J.A.

A1 - Faught,B.E.

Y1 - 2012/09//

N1 - Cairney, John. Kwan, Matthew Y W. Hay, John A. Faught, Brent E  
 Research in developmental disabilities

8709782, rid

IM

Journal Article

English

KW - Medline

KW - Adipose Tissue/ph [Physiology]

KW - Adolescent

KW - Body Mass Index

KW - Body Weight/ph [Physiology]

KW - Child

KW - Cross-Sectional Studies

KW - Female

KW - Humans

KW - Male

KW - Motor Activity/ph [Physiology]

KW - Motor Skills Disorders/ep [Epidemiology]

KW - Motor Skills Disorders/pp [Physiopathology]

KW - Obesity/ep [Epidemiology]

KW - Obesity/pp [Physiopathology]

KW - Overweight/ep [Epidemiology]

KW - Overweight/pp [Physiopathology]

KW - Play and Playthings

KW - Risk Factors

KW - Sex Distribution

KW - Sports/sn [Statistics & Numerical Data]

RP - NOT IN FILE

SP - 1566

EP - 1573

JF - Research in Developmental Disabilities

JA - Res.Dev.Disabil.

VL - 33

IS - 5

CY - United States

N2 - BACKGROUND: To examine whether differences in participation in active play (PAP) can account for gender differences in the relationship between Developmental Coordination Disorder (DCD) and body weight/fat (BMI and percentage fat) in youth. METHODS: A cross-sectional investigation of students in grades four through eight (n = 590). Height, weight (BMI), and percentage body fat using bioelectrical impedance analysis (BIA; RJL Systems, MI) were collected. Motor proficiency and physical activity levels were also evaluated. RESULTS: We found gender specific patterns in the relationship between PAP, DCD, and BMI and body fat. Among boys with DCD, greater participation in active play is associated with higher BMI and percentage body fat. For girls with the disorder, the opposite relationship is observed. CONCLUSIONS: Participation in active play moderates the association between DCD, gender and body weight. Three possible explanations for why PAP is associated with higher BMI and percentage body fat in boys with DCD are provided. Copyright 2012 Elsevier Ltd. All rights reserved

SN - 1873-3379

AD - Department of Family Medicine, McMaster University, Hamilton, ON, Canada

UR - 22522216

ER -

TY - JOUR

ID - 162

T1 - Height, fun and safety in the design of children's playground equipment

A1 - Wakes,S.

A1 - Beukes,A.

Y1 - 2012///

N1 - Wakes, Sarah. Beukes, Amanda

International journal of injury control and safety promotion

101247254



IM

Journal Article. Research Support, Non-U.S. Gov't

English

KW - Medline

KW - Accidental Falls

KW - Child

KW - Equipment Design

KW - Female

KW - Humans

KW - Male

KW - Observation

KW - Parents/px [Psychology]

KW - Perception

KW - Play and Playthings/in [Injuries]

KW - Play and Playthings/px [Psychology]

KW - Questionnaires

KW - Risk Factors

KW - Safety

KW - Wounds and Injuries/pc [Prevention & Control]

RP - NOT IN FILE

SP - 101

EP - 108

JF - International Journal of Injury Control & Safety Promotion

JA - Int.J Inj.Contr.Saf Promot

VL - 19

IS - 2

CY - England

N2 - The study reported in this paper adopted a holistic design approach to investigate issues associated with height related playground injuries from a users' perspective. The main objective was to gain an understanding of the relationship between height and fun so as to establish practical guidelines for addressing the causes of height related injuries whilst maintaining the attributes of playground equipment that children find fun and challenging. Results show that, on the one hand, the risk of injury increases when height is coupled with the use of upper body strength and, on the other hand, that coordination is a greater source of fun and challenge than height for children. Accordingly, it is suggested that the level of risk of injury attached to children's playground equipment can be reduced when the use of lower body strength and coordination are combined with lower free fall heights

SN - 1745-7319

AD - Department of Applied Sciences, University of Otago, Dunedin, New Zealand. sarah@design.otago.ac.nz

UR - 21838539

ER -

TY - JOUR

ID - 163

T1 - Health risks of Oregon eighth-grade participants in the "choking game": results from a population-based survey

A1 - Ramowski,S.K.

A1 - Nystrom,R.J.

A1 - Rosenberg,K.D.

A1 - Gilchrist,J.

A1 - Chaumeton,N.R.

Y1 - 2012/05//

N1 - Ramowski, Sarah K. Nystrom, Robert J. Rosenberg, Kenneth D. Gilchrist, Julie. Chaumeton, Nigel R

Pediatrics

oxv, 0376422

AIM, IM

Comparative Study. Journal Article

English

KW - Medline  
 KW - Adolescent  
 KW - Airway Obstruction/ep [Epidemiology]  
 KW - Airway Obstruction/eh [Ethnology]  
 KW - Airway Obstruction/px [Psychology]  
 KW - Brain/bs [Blood Supply]  
 KW - Brain Ischemia/eh [Ethnology]  
 KW - Brain Ischemia/px [Psychology]  
 KW - Child  
 KW - Comorbidity  
 KW - Cross-Sectional Studies  
 KW - Ethnic Groups/px [Psychology]  
 KW - Ethnic Groups/sn [Statistics & Numerical Data]  
 KW - Euphoria  
 KW - Female  
 KW - Health Surveys  
 KW - Humans  
 KW - Hypoxia  
 KW - Brain/eh [Ethnology]  
 KW - Brain/px [Psychology]  
 KW - Male  
 KW - Mental Disorders/ep [Epidemiology]  
 KW - Mental Disorders/eh [Ethnology]  
 KW - Mental Disorders/px [Psychology]  
 KW - Motivation  
 KW - Oregon  
 KW - Play and Playthings/px [Psychology]  
 KW - Risk-Taking  
 KW - Sex Factors  
 KW - Substance-Related Disorders/ep [Epidemiology]  
 KW - Substance-Related Disorders/eh [Ethnology]  
 KW - Substance-Related Disorders/px [Psychology]  
 RP - NOT IN FILE  
 SP - 846  
 EP - 851  
 JA - Pediatrics  
 VL - 129  
 IS - 5  
 CY - United States  
 N2 - OBJECTIVE: To examine the risk behaviors associated with participation in the "choking game" by eighth-graders in Oregon. METHODS: We obtained data from the 2009 Oregon Healthy Teens survey, a cross-sectional weighted survey of 5348 eighth-graders that questioned lifetime prevalence and frequency of choking game participation. The survey also included questions about physical and mental health, gambling, sexual activity, nutrition, physical activity/body image, exposure to violence, and substance use. RESULTS: Lifetime prevalence of choking game participation was 6.1% for Oregon eighth-graders, with no differences between males and females. Of the eighth-grade choking game participants, 64% had engaged in the activity more than once and 26.6% >5 times. Among males, black youth were more likely to participate than white youth. Among both females and males, Pacific Islander youth were much more likely to participate than white youth. Multivariate logistic regression revealed that sexual activity and substance use were significantly associated with choking game participation for both males and females. CONCLUSIONS: At >6%, the prevalence of choking game participation among Oregon youth is consistent with previous findings. However, we found that most of those who participate will put themselves at risk more than once. Participants also have other associated health risk behaviors. The comprehensive adolescent well visit, as recommended by the American Academy of Pediatrics, is a good opportunity for providers to conduct a health behavior risk assessment and, if appropriate, discuss the dangers of engaging in this activity  
 SN - 1098-4275

AD - Oregon Health Authority, Public Health Division, Portland, Oregon 97232, USA

UR - 22508913

ER -

TY - JOUR

ID - 164

T1 - Child, family, and neighborhood associations with parent and peer interactive play during early childhood

A1 - Kenney,M.K.

Y1 - 2012/04//

N1 - Kenney, Mary Kay

Maternal and child health journal

9715672, di8

IM

Journal Article

English

KW - Medline

KW - Child Behavior

KW - Child Development

KW - Child

KW - Preschool

KW - Cross-Sectional Studies

KW - Family Characteristics

KW - Female

KW - Humans

KW - Infant

KW - Logistic Models

KW - Male

KW - Parent-Child Relations

KW - Parenting

KW - Parents

KW - Peer Group

KW - Play and Playthings

KW - Residence Characteristics

KW - Social Behavior

KW - Social Environment

KW - Socioeconomic Factors

KW - United States

RP - NOT IN FILE

SP - S88

EP - 101

JF - Maternal & Child Health Journal

JA - Matern.Child Health J

VL - 16 Suppl 1

CY - United States

N2 - To examine national patterns of peer and parent interactive play opportunities that enhance early learning/socialization. Bivariate and multivariable analyses of cross-sectional data on 22,797 children aged 1-5 years from the National Survey of Children's Health 2007 were performed to determine the child, family, and neighborhood factors associated with four parent-initiated activities. Outcomes measures included time (days/week) children spent: participating in peer play; being read to; sung to/told stories; and taken on family outings. Covariates included race/ethnicity, poverty, TV watching, childcare, child and maternal physical and mental health, family factors (structure, size, language, stress, education), and neighborhood factors (amenities, support, physical condition, safety). According to adjusted regression models, minority children from lower income, non-English-speaking households with limited education, poorer maternal health and greater parenting stress were read to/told stories less than children without these characteristics, while neighborhood factors exerted less influence. In contrast, significant reductions in days/week of peer play were associated with unsupportive neighborhoods and those with the poorest physical conditions and limited amenities. Likewise,

reductions in outings were associated with fewer neighborhood amenities. The findings of this study indicate that a variety of child, family, and neighborhood factors are associated with parent-initiated behaviors such as reading, storytelling, peer interactive play, and family outings. Appropriate evidence-based home visiting interventions targeting child health, parenting skills, early childhood education, and social services in at-risk communities would appear to be appropriate vehicles for addressing such parent-initiated play activities that have the potential to enhance development

SN - 1573-6628

AD - U.S. Department of Health and Human Services, Health Resources and Services Administration, Maternal and Child Health Bureau, 5600 Fishers Lane, Rm 18-41, Rockville, MD 20857, USA. mkenney@hrsa.gov

UR - 22453331

ER -

TY - JOUR

ID - 165

T1 - Canadian Physical Activity Guidelines for the Early Years (aged 0-4 years)

A1 - Tremblay,M.S.

A1 - Leblanc,A.G.

A1 - Carson,V.

A1 - Choquette,L.

A1 - Connor,Gorber S.

A1 - Dillman,C.

A1 - Duggan,M.

A1 - Gordon,M.J.

A1 - Hicks,A.

A1 - Janssen,I.

A1 - Kho,M.E.

A1 - Latimer-Cheung,A.E.

A1 - Leblanc,C.

A1 - Murumets,K.

A1 - Okely,A.D.

A1 - Reilly,J.J.

A1 - Spence,J.C.

A1 - Stearns,J.A.

A1 - Timmons,B.W.

A1 - Canadian Society for Exercise Physiology.

Y1 - 2012/04//

N1 - Tremblay, Mark S. Leblanc, Allana G. Carson, Valerie. Choquette, Louise. Connor Gorber, Sarah. Dillman, Carrie. Duggan, Mary. Gordon, Mary Jane. Hicks, Audrey. Janssen, Ian. Kho, Michelle E. Latimer-Cheung, Amy E. Leblanc, Claire. Murumets, Kelly. Okely, Anthony D. Reilly, John J. Spence, John C. Stearns, Jodie A. Timmons, Brian W. Canadian Society for Exercise Physiology

Applied physiology, nutrition, and metabolism = Physiologie appliquee, nutrition et metabolisme  
101264333

IM

Guideline. Journal Article. Research Support, Non-U.S. Gov't

English French

KW - Medline

KW - Canada

KW - Child Behavior/ph [Physiology]

KW - Child Welfare

KW - Child

KW - Preschool

KW - Humans

KW - Infant

KW - Life Style

KW - Motor Activity

KW - Public Health

RP - NOT IN FILE

SP - 345

EP - 369

JF - Applied Physiology, Nutrition, & Metabolism = Physiologie Appliquee, Nutrition et Metabolisme

JA - Appl.Physiol Nutr Metab

VL - 37

IS - 2

CY - Canada

N2 - The Canadian Society for Exercise Physiology (CSEP), with assistance from multiple partners, stakeholders, and researchers, developed the first Canadian Physical Activity Guidelines for the Early Years (aged 0-4 years). These national guidelines were created in response to an urgent call from public health, health care, child care, and fitness practitioners for healthy active living guidance for the early years. The guideline development process was informed by the Appraisal of Guidelines for Research Evaluation (AGREE) II instrument and the evidence assessed using the Grading of Recommendations Assessment, Development, and Evaluation (GRADE) system. The recommendations are informed by evidence from a systematic review that examined the relationships between physical activity and health indicators (healthy body weight, bone and skeletal health, motor skill development, psychosocial health, cognitive development, and cardio-metabolic disease risk factors) for three age groups (infants aged <1 year; toddlers aged 1-2 years; preschoolers aged 3-4 years). The new guidelines include a preamble to provide context, followed by the specific recommendations. The final guidelines benefitted from an extensive on-line consultation process with input from over 900 domestic and international stakeholders, end-users, and key informants. The final guideline recommendations state that for healthy growth and development, infants (aged <1 year) should be physically active several times daily - particularly through interactive floor-based play. Toddlers (aged 1-2 years) and preschoolers (aged 3-4 years) should accumulate at least 180 min of physical activity at any intensity spread throughout the day, including a variety of activities in different environments, activities that develop movement skills, and progression toward at least 60 min of energetic play by 5 years of age. More daily physical activity provides greater benefits

SN - 1715-5312

AD - University of Ottawa, Ottawa, ON, Canada. mtremblay@cheo.on.ca

UR - 22448608

ER -

TY - JOUR

ID - 166

T1 - Maternal play behaviors, child negativity, and preterm or low birthweight toddlers' visual-spatial outcomes: testing a differential susceptibility hypothesis

A1 - Iwath-Bart,J.E.

A1 - Miller,K.E.

A1 - Hane,A.

Y1 - 2012/04//

N1 - Dilworth-Bart, Janean E. Miller, Kyle E. Hane, Amanda

Infant behavior & development

7806016

IM

Journal Article. Research Support, N.I.H., Extramural. Research Support, Non-U.S. Gov't

English

KW - Medline

KW - Body Temperature

KW - Child Development

KW - Child

KW - Preschool

KW - Cognition Disorders/et [Etiology]

KW - Disease Susceptibility

KW - Female

KW - Humans

KW - Infant

KW - Low Birth Weight  
KW - Newborn  
KW - Longitudinal Studies  
KW - Male  
KW - Maternal Behavior  
KW - Mother-Child Relations  
KW - Neuropsychological Tests  
KW - Photic Stimulation  
KW - Play and Playthings  
KW - Premature Birth/pp [Physiopathology]  
KW - Psychiatric Status Rating Scales  
KW - Regression Analysis  
KW - Risk Factors  
KW - Sex Factors  
KW - Space Perception/ph [Physiology]

RP - NOT IN FILE

SP - 312

EP - 322

JF - Infant Behavior & Development

JA - Infant behav

VL - 35

IS - 2

CY - United States

N2 - OBJECTIVE: We examined the joint roles of child negative emotionality and parenting in the visual-spatial development of toddlers born preterm or with low birthweights (PTLBW). METHOD: Neonatal risk data were collected at hospital discharge, observer- and parent-rated child negative emotionality was assessed at 9-months postterm, and mother-initiated task changes and flexibility during play were observed during a dyadic play interaction at 16-months postterm. Abbreviated IQ scores, and verbal/nonverbal and visual-spatial processing data were collected at 24-months postterm. RESULTS: Hierarchical regression analyses did not support our hypothesis that the visual-spatial processing of PTLBW toddlers with higher negative emotionality would be differentially susceptible to parenting behaviors during play. Instead, observer-rated distress and a negativity composite score were associated with less optimal visual-spatial processing when mothers were more flexible during the 16-month play interaction. Mother-initiated task changes did not interact with any of the negative emotionality variables to predict any of the 24-month neurocognitive outcomes, nor did maternal flexibility interact with mother-rated difficult temperament to predict the visual-spatial processing outcomes.

Copyright A 2011 Elsevier Inc. All rights reserved

SN - 1934-8800

AD - Department of Human Development and Family Studies, University of Wisconsin, Madison, WI, United States. jedilworth@wisc.edu

UR - 22209050

ER -

TY - JOUR

ID - 167

T1 - Exposure to open-fire cooking and cognitive performance in children

A1 - Munroe,R.L.

A1 - Gauvain,M.

Y1 - 2012///

N1 - Munroe, Robert L. Gauvain, Mary

International journal of environmental health research

9106628, dus

IM

Journal Article. Research Support, U.S. Gov't, Non-P.H.S.

English

KW - Medline

KW - Air Pollution

KW - Indoor/ae [Adverse Effects]  
 KW - Belize/ep [Epidemiology]  
 KW - Child  
 KW - Preschool  
 KW - Cognition/de [Drug Effects]  
 KW - Cooking  
 KW - Environmental Exposure/ae [Adverse Effects]  
 KW - Female  
 KW - Fires  
 KW - Humans  
 KW - Kenya/ep [Epidemiology]  
 KW - Male  
 KW - Memory/de [Drug Effects]  
 KW - Nepal/ep [Epidemiology]  
 KW - Pattern Recognition  
 KW - Visual/de [Drug Effects]  
 KW - Play and Playthings  
 KW - Samoa/ep [Epidemiology]  
 KW - Smoke/ae [Adverse Effects]  
 KW - Wood  
 RP - NOT IN FILE  
 SP - 156  
 EP - 164  
 JF - International Journal of Environmental Health Research  
 JA - Int.J Environ.Health Res.  
 VL - 22  
 IS - 2

CY - England  
 N2 - We reexamined field data on cognitive performance in light of recent research that shows open-fire cooking--with its emission of harmful substances--to pose a risk to healthy physical development. Tests of three- to nine-year-old children in four communities around the world yielded evidence concerning block-building skills, memory, and the discernment of embedded figures. Naturalistic observations of these children were also undertaken in everyday settings. Open-fire cooking (as opposed to cooking on kerosene stoves) was associated with both lower cognitive performance and less frequent structured play at all ages. Although these correlational results do not reveal causal mechanisms, they are consistent with ideas about negative developmental consequences of exposure to open-fire cooking and suggest that research is needed on the effect on brain development of practices involving production of indoor smoke

SN - 1369-1619  
 AD - Pitzer College, Claremont, California, USA  
 UR - 22128885  
 ER -

TY - JOUR  
 ID - 168  
 T1 - Societal values and policies may curtail preschool children's physical activity in child care centers  
 A1 - Copeland,K.A.  
 A1 - Sherman,S.N.  
 A1 - Kendeigh,C.A.  
 A1 - Kalkwarf,H.J.  
 A1 - Saelens,B.E.  
 Y1 - 2012/02//  
 N1 - Copeland, Kristen A. Sherman, Susan N. Kendeigh, Cassandra A. Kalkwarf, Heidi J. Saelens, Brian E  
 Pediatrics  
 oxv, 0376422  
 AIM, IM

Journal Article. Research Support, N.I.H., Extramural. Research Support, Non-U.S. Gov't  
English

KW - Medline

KW - Child Day Care Centers

KW - Child

KW - Preschool

KW - Female

KW - Focus Groups

KW - Health Surveys

KW - Humans

KW - Male

KW - Motor Activity

KW - Ohio

KW - Play and Playthings

KW - Public Policy

KW - Safety Management

KW - Sedentary Lifestyle

KW - Social Values

KW - Wounds and Injuries/et [Etiology]

KW - Wounds and Injuries/pc [Prevention & Control]

RP - NOT IN FILE

SP - 265

EP - 274

JA - Pediatrics

VL - 129

IS - 2

CY - United States

N2 - BACKGROUND AND OBJECTIVES: Three-fourths of US preschool-age children are in child care centers. Children are primarily sedentary in these settings, and are not meeting recommended levels of physical activity. Our objective was to identify potential barriers to children's physical activity in child care centers.

METHODS: Nine focus groups with 49 child care providers (55% African American) were assembled from 34 centers (inner-city, suburban, Head Start, and Montessori) in Cincinnati, Ohio. Three coders independently analyzed verbatim transcripts for themes. Data analysis and interpretation of findings were verified through triangulation of methods.

RESULTS: We identified 3 main barriers to children's physical activity in child care: (1) injury concerns, (2) financial, and (3) a focus on "academics." Stricter licensing codes intended to reduce children's injuries on playgrounds rendered playgrounds less physically challenging and interesting. In addition, some parents concerned about potential injury, requested staff to restrict playground participation for their children. Small operating margins of most child care centers limited their ability to install abundant playground equipment. Child care providers felt pressure from state mandates and parents to focus on academics at the expense of gross motor play. Because children spend long hours in care and many lack a safe place to play near their home, these barriers may limit children's only opportunity to engage in physical activity. CONCLUSIONS: Societal priorities for young children--safety and school readiness--may be hindering children's physical development. In designing environments that optimally promote children's health and development, child advocates should think holistically about potential unintended consequences of policies

SN - 1098-4275

AD - Division of General and Community Pediatrics, Cincinnati Children's Hospital Medical Center, Cincinnati, OH 45229, USA. kristen.copeland@cchmc.org

UR - 22218842

ER -

TY - JOUR

ID - 169

T1 - "We don't need no education": Video game preferences, video game motivations, and aggressiveness among adolescent boys of different educational ability levels

A1 - Nije,Bijvank M.

A1 - Konijn,E.A.



A1 - Bushman,B.J.

Y1 - 2012/02//

N1 - Nije Bijvank, Marije. Konijn, Elly A. Bushman, Brad J

Journal of adolescence

hwt, 7808986

IM

Journal Article

English

KW - Medline

KW - Adolescent

KW - Adolescent Behavior/px [Psychology]

KW - Aggression/px [Psychology]

KW - Child

KW - Educational Status

KW - Humans

KW - Male

KW - Motivation

KW - Risk Factors

KW - Video Games/px [Psychology]

KW - Violence/px [Psychology]

RP - NOT IN FILE

SP - 153

EP - 162

JF - Journal of Adolescence

JA - J Adolesc

VL - 35

IS - 1

CY - England

N2 - This research focuses on low educational ability as a risk factor for aggression and violent game play. We propose that boys of lower educational ability are more attracted to violent video games than other boys are, and that they are also higher in trait aggressiveness and sensation seeking. Participants were Dutch boys in public schools (N = 830, age-range 11-17). In the Netherlands, standardized tests are used to place students into lower, medium, and higher educational ability groups. Results showed that boys in the lower educational ability group preferred to play violent, stand-alone games, identified more with video game characters, and perceived video games to be more realistic than other boys did. Lower levels of education were also related to higher levels of aggressiveness and sensation seeking. Higher educational ability boys preferred social, multiplayer games. Within a risk and resilience model, boys with lower educational ability are at greater risk for aggression.

Copyright 2011 The Foundation for Professionals in Services for Adolescents. All rights reserved

SN - 1095-9254

AD - Department of Communication Science, School of Social Sciences, VU University Amsterdam, Amsterdam, The Netherlands. m.nijebijvank@saxion.nl

UR - 21529925

ER -

TY - JOUR

ID - 170

T1 - Security of attachment and quality of mother-toddler social interaction in a high-risk sample

A1 - Haltigan,J.D.

A1 - Lambert,B.L.

A1 - Seifer,R.

A1 - Ekas,N.V.

A1 - Bauer,C.R.

A1 - Messinger,D.S.

Y1 - 2012/02//

N1 - Haltigan, John D. Lambert, Brittany L. Seifer, Ronald. Ekas, Naomi V. Bauer, Charles R. Messinger, Daniel S

Infant behavior & development

7806016

IM

Comparative Study. Journal Article. Multicenter Study. Research Support, N.I.H., Extramural

English

KW - Medline

KW - Adolescent

KW - Adult

KW - Child

KW - Preschool

KW - Female

KW - Humans

KW - Interpersonal Relations

KW - Male

KW - Middle Aged

KW - Mother-Child Relations

KW - Object Attachment

KW - Play and Playthings/px [Psychology]

KW - Risk-Taking

KW - Young Adult

RP - NOT IN FILE

SP - 83

EP - 93

JF - Infant Behavior & Development

JA - Infant behav

VL - 35

IS - 1

CY - United States

N2 - The quality of children's social interactions and their attachment security with a primary caregiver are two widely studied indices of socioemotional functioning in early childhood. Although both Bowlby and Ainsworth suggested that the parent-child interactions underlying the development of attachment security could be distinguished from other aspects of parent-child interaction (e.g., play), relatively little empirical research has examined this proposition. The aim of the current study was to explore this issue by examining concurrent relations between toddler's attachment security in the Strange Situation Procedure and quality of mother-child social interaction in a high-risk sample of toddlers characterized by prenatal cocaine exposure and low levels of maternal education. Analyses of variance suggested limited relations between attachment security and quality of social interaction. Further research examining the interrelations among various components of the parent-child relationship is needed. Copyright 2011 Elsevier Inc. All rights reserved

SN - 1934-8800

AD - University of North Carolina at Greensboro, USA. jdhaltig@uncg.edu

UR - 21981901

ER -

TY - JOUR

ID - 171

T1 - Physical activity and screen time behaviour in metropolitan, regional and rural adolescents: a -sectional study of Australians aged 9-16 years

A1 - Dollman,J.

A1 - Maher,C.

A1 - Olds,T.S.

A1 - Ridley,K.

Y1 - 2012/01//

N1 - Dollman, James. Maher, Carol. Olds, Tim S. Ridley, Kate

Journal of science and medicine in sport / Sports Medicine Australia

c54, 9812598

IM

Journal Article. Research Support, Non-U.S. Gov't  
English

KW - Medline

KW - Adolescent

KW - Australia

KW - Child

KW - Cross-Sectional Studies

KW - Female

KW - Humans

KW - Male

KW - Motor Activity/ph [Physiology]

KW - Rural Population

KW - Sedentary Lifestyle

KW - Urban Population

RP - NOT IN FILE

SP - 32

EP - 37

JF - Journal of Science & Medicine in Sport

JA - J Sci Med Sport

VL - 15

IS - 1

CY - Australia

N2 - OBJECTIVES: While there is consistent evidence that rural adults in Australia are less active than their urban counterparts, studies relating geographical remoteness to activity patterns in Australian adolescents have yielded inconsistent results. The aim of this study was to describe objectively and subjectively measured patterns of physical activity and sedentary behaviours across remoteness categories in a representative sample of 9-16 year old Australians. DESIGN: Cross-sectional observational study. METHODS: 2071 Australian adolescents provided self-report use of time data on four days and wore a pedometer for at least 6 days within the 2007 Australian National Children's Nutrition and Physical Activity Survey. Comparisons of activity patterns were made across four objectively-determined remoteness categories (Major City, Inner Regional, Outer Regional and Remote), adjusting for household income, parental education and age. RESULTS: Adolescents living in major cities self-reported 11-29 min less moderate to vigorous physical activity each day than their counterparts living in geographically more remote areas, and took 150-850 fewer steps each day. While there were no differences in time spent in sport or active transport, differences in free play participation were significant. Males in major cities also reported higher levels of screen time. Differences were somewhat more marked among males than among females. CONCLUSIONS: Activity levels among Australian adolescents show contrasting patterns of geographical differences to those found in Australian adults. Higher levels of free play among rural Australian adolescents may be due to more available space and less fear of traffic and stranger risks. Copyright 2011 Sports Medicine Australia. Published by Elsevier Ltd. All rights reserved

SN - 1878-1861

AD - Nutritional Physiology Research Centre, University of South Australia, Adelaide, South Australia, Australia. james.dollman@unisa.edu.au

UR - 21742553

ER -

TY - JOUR

ID - 172

T1 - Imperial boyhood: piracy and the play ethic

A1 - Deane,B.

Y1 - 2011///

N1 - Deane, Bradley

Victorian studies

9426344

Q

Historical Article. Journal Article

English

KW - Medline

KW - Aggression/ph [Physiology]

KW - Aggression/px [Psychology]

KW - Child

KW - Colonialism/hi [History]

KW - Colonialism

KW - Competitive Behavior/ph [Physiology]

KW - Competitive Behavior

KW - Fantasy

KW - Great Britain/eh [Ethnology]

KW - Hierarchy

KW - Social/hi [History]

KW - History

KW - 19th Century

KW - 20th Century

KW - Humans

KW - Literature/hi [History]

KW - Literature

KW - Male

KW - Masculinity/hi [History]

KW - Morals

KW - Play and Playthings/px [Psychology]

KW - Play and Playthings

KW - Power (Psychology)

RP - NOT IN FILE

SP - 689

EP - 714

JF - Victorian Studies

JA - Vic.stud.

VL - 53

IS - 4

CY - United States

N2 - Representations of perpetual boyhood came to fascinate the late Victorians, partly because such images could naturalize a new spirit of imperial aggression and new policies of preserving power. This article traces the emergence of this fantasy through a series of stories about the relationship of the boy and the pirate, figures whose opposition in mid-Victorian literature was used to articulate the moral legitimacy of colonialism, but who became doubles rather than antitheses in later novels, such as R.L. Stevenson's "Treasure Island" and Joseph Conrad's "Lord Jim." Masculine worth needed no longer to be measured by reference to transcendent, universal laws, but by a morally flexible ethic of competitive play, one that bound together boyishness and piracy in a satisfying game of international adventure

SN - 0042-5222

AD - University of Minnesota, Morris

UR - 22355829

ER -

TY - JOUR

ID - 173

T1 - Where they live, how they play: neighborhood greenness and outdoor physical activity among preschoolers

A1 - Grigsby-Toussaint,D.S.

A1 - Chi,S.H.

A1 - Fiese,B.H.

A1 - STRONG Kids Project Writing Group.

Y1 - 2011///

N1 - Grigsby-Toussaint, Diana S. Chi, Sang-Hyun. Fiese, Barbara H. STRONG Kids Project Writing Group  
International journal of health geographics  
101152198

IM

Journal Article. Research Support, Non-U.S. Gov't

English

KW - Medline

KW - Child Behavior

KW - Child Welfare

KW - Child

KW - Preschool

KW - Cohort Studies

KW - Environment

KW - Exercise/ph [Physiology]

KW - Female

KW - Humans

KW - Linear Models

KW - Male

KW - Motor Activity/ph [Physiology]

KW - Multivariate Analysis

KW - Parent-Child Relations

KW - Play and Playthings

KW - Residence Characteristics

KW - Risk Assessment

KW - Time Factors

KW - United States

KW - Urban Population

RP - NOT IN FILE

SP - 66

JF - International Journal of Health Geographics [Electronic Resource]

JA - Int.J Health Geogr.

VL - 10

CY - England

N2 - BACKGROUND: Emerging empirical evidence suggests exposure to "green" environments may encourage higher levels of physical activity among children. Few studies, however, have explored this association exclusively in pre-school aged children in the United States. We examined whether residing in neighborhoods with higher levels of greenness was associated with higher levels of outdoor physical activity among preschoolers. In addition, we also explored whether outdoor playing behaviors (e.g., active vs. quiet) were influenced by levels of neighborhood greenness independent of demographic and parental support factors. RESULTS: Higher levels of neighborhood greenness as measured by the Normalized Difference Vegetation Index (NDVI) was associated with higher levels of outdoor playing time among preschool-aged children in our sample. Specifically, a one unit increase in neighborhood greenness increased a child's outdoor playing time by approximately 3 minutes. A dose-response relationship was observed between increasing levels of parental support for physical activity (e.g., time spent playing with children) and child outdoor physical activity ( $p < 0.01$ ). CONCLUSIONS: Consistent with previous studies, neighborhood greenness influences physical activity behavior. However, for preschoolers, parental involvement may be more critical for improving physical activity levels

SN - 1476-072X

AD - Department of Kinesiology and Community Health, Division of Nutritional Sciences, University of Illinois at Urbana Champaign, USA. dgrigs1@illinois.edu

UR - 22165919

ER -

TY - JOUR

ID - 174

T1 - Home, school, and neighborhood environment factors and youth physical activity

A1 - Millstein,R.A.

A1 - Strobel,J.

A1 - Kerr,J.

A1 - Sallis,J.F.

A1 - Norman,G.J.

A1 - Durant,N.

A1 - Harris,S.

A1 - Saelens,B.E.

Y1 - 2011/11//

N1 - Millstein, Rachel A. Strobel, Joe. Kerr, Jacqueline. Sallis, James F. Norman, Gregory J. Durant, Nefertiti.

Harris, Sion. Saelens, Brian E

Pediatric exercise science

8909729

IM

Journal Article

English

KW - Medline

KW - Adolescent

KW - Child

KW - Preschool

KW - Data Collection

KW - Environment Design

KW - Female

KW - Humans

KW - Linear Models

KW - Male

KW - Motor Activity

KW - Multivariate Analysis

KW - Parents

KW - Play and Playthings

KW - Public Facilities

KW - Residence Characteristics

KW - Safety

KW - Schools

KW - Socioeconomic Factors

KW - Sports Equipment

RP - NOT IN FILE

SP - 487

EP - 503

JF - Pediatric Exercise Science

JA - Pediatr Exerc.Sci

VL - 23

IS - 4

CY - United States

N2 - This study examined the contributions of home, school, and neighborhood factors related to youth physical activity (PA). Adolescents (ages 12-18; N = 137) and parents of younger children (ages 5-11; N = 104) from three US metropolitan areas completed surveys. Youth PA was estimated from six items assessing overall physical activity. Bivariate analyses between environment factors and PA were significant correlations in each environmental setting for adolescents ( $r$ 's:0.16-0.28), but for parents of children, only for the home and neighborhood settings ( $r$ 's: 0.14-0.39). For adolescents, pieces of equipment at home, family recreation membership, equipment at school, and neighborhood aesthetics explained 15.8% of variance in PA. For younger children (based on parent report), pieces of equipment at home, neighborhood traffic safety, walking/cycling facilities, and street connectivity explained 21.4% of the variance in PA. Modifiable factors like increasing access to equipment at home and school, and improving neighborhood aesthetics may impact youth PA. To optimize explanation of youth PA, factors from multiple environments need to be considered

SN - 1543-2920

AD - SDSU/UCSD Joint Doctoral Program in Clinical Psychology, San Diego, CA, USA

UR - 22109776

ER -

TY - JOUR

ID - 175

T1 - High frequency of rare copy number variants affecting functionally related genes in patients with structural brain malformations

A1 - Kariminejad,R.

A1 - Lind-Thomsen,A.

A1 - Tumer,Z.

A1 - Erdogan,F.

A1 - Ropers,H.H.

A1 - Tommerup,N.

A1 - Ullmann,R.

A1 - Moller,R.S.

Y1 - 2011/12//

N1 - Kariminejad, Roxana. Lind-Thomsen, Allan. Tumer, Zeynep. Erdogan, Fikret. Ropers, Hans H. Tommerup, Niels. Ullmann, Reinhard. Moller, Rikke S

Human mutation

brd, 9215429

IM

Journal Article. Research Support, Non-U.S. Gov't

English

KW - Medline

KW - Agenesis of Corpus Callosum/ge [Genetics]

KW - Agenesis of Corpus Callosum/ra [Radiography]

KW - Brain/ra [Radiography]

KW - Child

KW - Preschool

KW - Cohort Studies

KW - Comparative Genomic Hybridization

KW - DNA Copy Number Variations/ge [Genetics]

KW - Epilepsy/ge [Genetics]

KW - Epilepsy/ra [Radiography]

KW - Female

KW - Gene Dosage/ge [Genetics]

KW - Gene Frequency

KW - Humans

KW - Intellectual Disability/ge [Genetics]

KW - Intellectual Disability/ra [Radiography]

KW - Magnetic Resonance Imaging

KW - Male

KW - Nervous System Malformations/ge [Genetics]

KW - Nervous System Malformations/ra [Radiography]

KW - Phenotype

KW - Proteins/ge [Genetics]

KW - Tomography Scanners

KW - X-Ray Computed

RP - NOT IN FILE

SP - 1427

EP - 1435

JF - Human Mutation

JA - Hum.Mutat.

VL - 32

IS - 12

CY - United States

N2 - During the past years, significant advances have been made in our understanding of the development of the human brain, and much of this knowledge comes from genetic studies of disorders associated with abnormal brain development. We employed array-comparative genomic hybridization (CGH) to investigate copy number variants (CNVs) in a cohort of 169 patients with various structural brain malformations including lissencephaly, polymicrogyria, focal cortical dysplasia, and corpus callosum agenesis. The majority of the patients had intellectual disabilities (ID) and suffered from symptomatic epilepsy. We detected at least one rare CNV in 38 patients (22.5%). All genes located within the rare CNVs were subjected to enrichment analysis for specific Gene Ontology Terms or Kyoto Encyclopedia of Genes and Genomes pathways and to protein-protein network analysis. Based on these analyses, we propose that genes involved in "axonal transport," "cation transmembrane transporter activity," and the "c-Jun N-terminal kinase (JNK) cascade" play a significant role in the etiology of brain malformations. This is to the best of our knowledge the first systematic study of CNVs in patients with structural brain malformations and our data show that CNVs play an important role in the etiology of these malformations, either as direct causes or as genetic risk factors. 2011 Wiley Periodicals, Inc

SN - 1098-1004

AD - Kariminejad-Najmabadi Pathology and Genetics Center, Tehran, Iran

UR - 21882292

ER -

TY - JOUR

ID - 176

T1 - Association of maternal and child blood lead and hemoglobin levels with maternal perceptions of parenting their young children

A1 - Kordas,K.

A1 - Ardoino,G.

A1 - Ciccariello,D.

A1 - Manay,N.

A1 - Ettinger,A.S.

A1 - Cook,C.A.

A1 - Queirolo,E.I.

Y1 - 2011/12//

N1 - Kordas, Katarzyna. Ardoino, Graciela. Ciccariello, Daniela. Manay, Nelly. Ettinger, Adrienne S. Cook, Casey A. Queirolo, Elena I

Neurotoxicology

oap, 7905589

IM

Journal Article

English

KW - Medline

KW - Adult

KW - Anemia/bl [Blood]

KW - Anemia/px [Psychology]

KW - Biological Markers/bl [Blood]

KW - Child Behavior

KW - Child Development

KW - Child

KW - Preschool

KW - Depression/bl [Blood]

KW - Depression/px [Psychology]

KW - Emotions

KW - Environmental Pollutants/ae [Adverse Effects]

KW - Environmental Pollutants/bl [Blood]

KW - Exploratory Behavior

KW - Factor Analysis

KW - Statistical

KW - Female



KW - Hemoglobins/an [Analysis]  
 KW - Humans  
 KW - Infant  
 KW - Lead/ae [Adverse Effects]  
 KW - Lead/bl [Blood]  
 KW - Lead Poisoning  
 KW - Nervous System  
 KW - Adult/bl [Blood]  
 KW - Adult/di [Diagnosis]  
 KW - Adult/px [Psychology]  
 KW - Childhood/bl [Blood]  
 KW - Childhood/di [Diagnosis]  
 KW - Childhood/px [Psychology]  
 KW - Male  
 KW - Maternal Behavior  
 KW - Mother-Child Relations  
 KW - Mothers/px [Psychology]  
 KW - Multivariate Analysis  
 KW - Neuropsychological Tests  
 KW - Parenting  
 KW - Perception  
 KW - Play and Playthings  
 KW - Questionnaires  
 KW - Risk Assessment  
 KW - Risk Factors  
 KW - Stress  
 KW - Psychological/bl [Blood]  
 KW - Psychological/px [Psychology]  
 KW - Uruguay  
 KW - Young Adult  
 RP - NOT IN FILE  
 SP - 693  
 EP - 701  
 JF - Neurotoxicology  
 VL - 32  
 IS - 6  
 CY - Netherlands

N2 - Biological and psychosocial factors affect child development and behavior. Whereas biological underpinnings behind the neurotoxic effects of lead are studied extensively, the effects of psychosocial factors contributing to poor behavioral outcomes in lead-exposed children are not well understood. Parental attributes and practices may moderate or mediate the effects of lead on children's behavioral outcomes. We investigated the hypothesis that maternal and child lead and hemoglobin levels are associated with maternal perceptions of their parenting. Specifically, we hypothesized that children with higher blood lead (BLL) and lower hemoglobin concentrations would be associated with poorer maternal self-assessments of their parenting skills or the mother-child relationship. Children aged 13-55 months and their mothers (n=109) were recruited from among the participants of a previous lead and anemia screening study and from preschools in Montevideo, Uruguay. The mother-child pair attended two study visits: one to collect biological samples and answer demographic and child questionnaires, including statements regarding parenting; and a second to evaluate maternal IQ, depression and stress, and child development. Of the children, 51.6% had blood lead concentrations (BLLs)  $\geq 5$  ug/dL, 18.0% had anemia, and 8% had both conditions. Among mothers, 48.4% had BLLs  $\geq 5$  ug/dL, 16.0% had anemia, and 11% had both. BLLs  $\geq 5$  ug/dL in mother or child were associated with lower maternal perceptions of being skilled at discipline ( $p < 0.05$ ). Maternal anemia was associated with lower likelihood that mothers would let their children explore and play ( $p < 0.05$ ), whereas child anemia was associated with maternal perception of lower emotional support ( $p < 0.01$ ). In addition to shared environmental exposures, parenting and family interactions need to be considered as potentially contributing factors to poorer outcomes in lead-exposed children. Copyright A 2011 Elsevier Inc. All rights reserved

SN - 1872-9711

AD - Department of Nutritional Sciences, Pennsylvania State University, University Park, PA 16802, USA.

kxk48@psu.edu

UR - 21925208

ER -

TY - JOUR

ID - 178

T1 - Development and results of a new methodology to perform focus group with preschool children on their beliefs and attitudes on physical activity

A1 - Cammisa,M.

A1 - Montrone,R.

A1 - Caroli,M.

Y1 - 2011/10//

N1 - Cammisa, Maria. Montrone, Rosa. Caroli, Margherita

International journal of pediatric obesity : IJPO : an official journal of the International Association for the Study of Obesity

101256330

IM

Journal Article. Research Support, Non-U.S. Gov't

English

KW - Medline

KW - Art

KW - Child

KW - Preschool

KW - Environment

KW - Faculty

KW - Female

KW - Focus Groups/mt [Methods]

KW - Health Behavior

KW - Health Knowledge

KW - Attitudes

KW - Practice

KW - Humans

KW - Male

KW - Motor Activity

KW - Parents

KW - Program Development/mt [Methods]

KW - Questionnaires

RP - NOT IN FILE

SP - 22

EP - 27

JF - International Journal of Pediatric Obesity

JA - Int.J Pediatr Obes.

VL - 6 Suppl 2

CY - England

N2 - The aim of this study is to develop and test a method to perform focus groups (FGs) and to elicit the subjective views of preschool-age children on physical activity and perceived kindergarten barriers to practice it. FGs have been held in three different kindergarten classes with 49 children who were 4-5 years old. Children were asked to draw themselves in their preferred way of playing and were asked few questions about their drawings to understand their behaviours and ideas. In class A and B, 67% and 75% of the children, respectively, drew sedentary plays (table and impersonation games). Children referred that the main obstacle to perform active games outside home/kindergarten was the parents' and teachers' perceived risk that they could be hurt or catch a cold. The children would like to have more table games in the kindergarten. 81% of children in class C drew active group games. All these children were well satisfied with their kindergarten environment and did not refer to any adults' fear regarding active play. This class teacher spent a lot of time to develop children's motor

abilities through active games and often used the garden to let the children to play freely. The use of drawings to understand children's habits on physical activity has turned out to be a reliable and easy tool in preschool children. The different results obtained in the two children groups show the need to change the beliefs and the behaviours of teachers and parents who seem to be non-architectural "invisible" barriers to be knocked down. This protocol has been developed by ASL Brindisi within the framework of PERISCOPE's objective to develop new methodologies

SN - 1747-7174

AD - Nutrition Unit, Department of Prevention, Azienda Sanitaria Locale Brindisi, Brindisi, Italy

UR - 21923291

ER -

TY - JOUR

ID - 179

T1 - Update on environmental risk factors for attention-deficit/hyperactivity disorder. [Review]

A1 - Froehlich,T.E.

A1 - Anixt,J.S.

A1 - Loe,I.M.

A1 - Chirdkiatgumchai,V.

A1 - Kuan,L.

A1 - Gilman,R.C.

Y1 - 2011/10//

N1 - Froehlich, Tanya E. Anixt, Julia S. Loe, Irene M. Chirdkiatgumchai, Vilawan. Kuan, Lisa. Gilman, Richard C

Current psychiatry reports

100888960, dym

IM

Journal Article. Research Support, N.I.H., Extramural. Research Support, Non-U.S. Gov't. Review English

KW - Medline

KW - Attention Deficit Disorder with Hyperactivity/et [Etiology]

KW - Child

KW - Preschool

KW - Environmental Exposure/ae [Adverse Effects]

KW - Female

KW - Humans

KW - Life Style

KW - Pregnancy

KW - Prenatal Exposure Delayed Effects

KW - Risk Factors

RP - NOT IN FILE

SP - 333

EP - 344

JF - Current Psychiatry Reports

JA - Curr.Psychiatry Rep.

VL - 13

IS - 5

CY - United States

N2 - Attention-deficit/hyperactivity disorder (ADHD) is a prevalent neurobehavioral disorder affecting 5% to 10% of children. Although considered to be a highly familial disorder, ADHD heritability estimates of 60% to 80% highlight the considerable role that environmental factors may still play in disorder susceptibility. Proposed ADHD environmental risk factors include prenatal substance exposures, heavy metal and chemical exposures, nutritional factors, and lifestyle/psychosocial factors. This paper reviews the literature published in 2010 investigating the association between environmental risk factors and ADHD or related symptomatology. Sources of risk factor exposure and the proposed mechanism by which each exposure is linked to ADHD-related neurobehavioral changes are also reported. Methodologic limitations of the current literature are discussed, and

guidelines for future study are proposed. An improved understanding of the role that environmental factors play in ADHD etiology is critical to future ADHD prevention efforts

SN - 1535-1645

AD - Cincinnati Children's Hospital, Cincinnati, OH 45229, USA. tanya.froehlich@cchmc.org

UR - 21779823

ER -

TY - JOUR

ID - 180

T1 - Observations of caregiver supervision of children at beaches: identification of factors associated with high supervision

A1 - Petrass,L.A.

A1 - Blitvich,J.D.

A1 - Finch,C.F.

Y1 - 2011/08//

N1 - Petrass, Lauren A. Blitvich, Jennifer D. Finch, Caroline F

Injury prevention : journal of the International Society for Child and Adolescent Injury Prevention

crz, 9510056

IM

Journal Article. Research Support, Non-U.S. Gov't

English

KW - Medline

KW - Adolescent

KW - Adult

KW - Australia

KW - Bathing Beaches

KW - Caregivers/sn [Statistics & Numerical Data]

KW - Child

KW - Preschool

KW - Female

KW - Humans

KW - Infant

KW - Linear Models

KW - Male

KW - Middle Aged

KW - Play and Playthings

KW - Questionnaires

KW - Risk Factors

KW - Safety

KW - Social Environment

KW - Young Adult

RP - NOT IN FILE

SP - 244

EP - 249

JA - Injury Prevention

VL - 17

IS - 4

CY - England

N2 - OBJECTIVE: To identify independent factors associated with caregiver supervision levels at beaches.

METHODS: Children (aged 1-14 years) engaged in beach play and their caregivers were observed at Australian beaches during September-April, 2008/09. Caregiver, child, and environmental factor data were collected and recorded on a validated observation instrument. The main outcome of interest was a continuous measure of supervision. After adjusting for potential clustering by beach/state, multivariable linear regression was used to identify independent factors associated with caregiver supervision. RESULTS: Four independent predictors of supervision and one interaction effect (child age by the caregiver and child position on beach) were identified. Caregivers who were supervising from a different position to where the child was playing were less likely to

provide high supervision, as were older caregivers (>35 years) compared to younger caregivers (<=34 years). Compared to children playing alone, children playing with one, or two or more others were less likely to receive high supervision, and children aged 1-4 years were likely to receive higher supervision than older children. CONCLUSION: This study provides new knowledge about underlying factors associated with the level of caregiver supervision in beach settings. Future studies should continue to explore independent predictors of supervision so that effective programmes, which focus on caregiver supervision, can be targeted to address poor supervision practices

SN - 1475-5785

AD - School of Human Movement and Sport Sciences, University of Ballarat, Mt Helen, Ballarat, Victoria, Australia. l.petrass@ballarat.edu.au

UR - 21335448

ER -

TY - JOUR

ID - 181

T1 - Testing and beyond: strategies and tools for evaluating and assessing infants and toddlers

A1 - Crais,E.R.

Y1 - 2011/07//

N1 - Crais, Elizabeth R

Language, speech, and hearing services in schools

0323431

IM

Journal Article

English

KW - Medline

KW - Child

KW - Preschool

KW - Cooperative Behavior

KW - Evidence-Based Practice

KW - Guidelines as Topic

KW - Humans

KW - Infant

KW - Language Development Disorders/di [Diagnosis]

KW - Language Development Disorders/th [Therapy]

KW - Language Tests

KW - Mass Screening

KW - Multilingualism

KW - Phonetics

KW - Play and Playthings

KW - Professional-Family Relations

KW - Risk Factors

KW - Semantics

RP - NOT IN FILE

SP - 341

EP - 364

JF - Language, Speech & Hearing Services in the Schools

JA - LANG SPEECH HEAR SERV SCH

VL - 42

IS - 3

CY - United States

N2 - PURPOSE: This article is a condensation of the recent American Speech-Language-Hearing Association (ASHA) document entitled Roles and Responsibilities of Speech-Language Pathologists in Early Intervention: Guidelines (ASHA, 2008). The article presents information on recommended and evidence-based practices related to the screening, evaluation, and assessment of infants and toddlers with, or at risk for, communication deficits. It is intended to be used by clinicians to enhance their practices. METHOD: The Guidelines document was developed using the available research evidence, expert clinical perspectives, and, when possible, family

perspectives related to the screening, evaluation, and assessment process. The current article includes key definitions and an overview of recommended practices in screening, evaluation, assessment, and results interpretation. **IMPLICATIONS:** The article provides important and timely information for professionals and families related to the screening, evaluation, and assessment of infants and toddlers with, or at risk for, communication deficits. Speech-language pathologists, other professionals, and family members can use the information to implement recommended and evidence-based practices when screening, evaluating, and assessing young children for communication deficits

SN - 1558-9129

AD - University of North Carolina at Chapel Hill, NC, USA. bcrais@med.unc.edu

UR - 20679409

ER -

TY - JOUR

ID - 182

T1 - "I think he is in his room playing a video game": parental supervision of young elementary-school children at home

A1 - Morrongiello, B.A.

A1 - Kane, A.

A1 - Zdzieborski, D.

Y1 - 2011/07//

N1 - Morrongiello, Barbara A. Kane, Alexa. Zdzieborski, Daniel

Journal of pediatric psychology

j18, 7801773

IM

Journal Article. Research Support, Non-U.S. Gov't

English

KW - Medline

KW - Accident Prevention

KW - Accidents

KW - Adult

KW - Child

KW - Female

KW - Humans

KW - Male

KW - Parent-Child Relations

KW - Parents

KW - Play and Playthings

KW - Prospective Studies

KW - Questionnaires

KW - Risk

KW - Risk-Taking

KW - Safety

KW - Social Environment

KW - Wounds and Injuries

RP - NOT IN FILE

SP - 708

EP - 717

JF - Journal of Pediatric Psychology

JA - J Pediatr Psychol.

VL - 36

IS - 6

CY - United States

N2 - **OBJECTIVES:** Using a prospective design, this research examined supervision of young elementary-school children at home and how this relates to child injury, parent permissiveness, and children's risk-taking propensity. **METHODS:** Mothers reported children's history of injuries and recorded home supervision over a 2-month interval on a weekly basis. Children independently completed diaries about daily events, including

injuries. RESULTS: Children spent 24% of time alone, mostly supervised intermittently or not at all. Parent permissiveness was associated with increased time unsupervised, while children's risk-taking propensity was associated with decreased time unsupervised. Greater direct supervision was associated with fewer injuries, while more indirect and non-supervision time emerged as risk factors and were associated with more frequent injury. CONCLUSIONS: These results extend those from preschool-aged children and suggest that caregiver supervision influences risk of injury across a broad age range throughout childhood. Implications for children's safety are discussed

SN - 1465-735X

AD - Psychology Department, University of Guelph, Ontario, Canada. bmorrong@uoguelph.ca

UR - 20693264

ER -

TY - JOUR

ID - 183

T1 - Playground renovations and quality at public parks in Boston, Massachusetts, 1996-2007

A1 - Barrett, J.L.

A1 - Hannon, C.

A1 - Keefe, L.

A1 - Gortmaker, S.L.

A1 - Cradock, A.L.

Y1 - 2011/07//

N1 - Barrett, Jessica L. Hannon, Cynthia. Keefe, Linda. Gortmaker, Steven L. Cradock, Angie L. Preventing chronic disease

101205018

IM

Journal Article. Research Support, U.S. Gov't, P.H.S.

English

KW - Medline

KW - Activities of Daily Living

KW - Adolescent

KW - Architectural Accessibility/st [Standards]

KW - Boston

KW - Child

KW - Humans

KW - Play and Playthings

KW - Retrospective Studies

KW - Safety Management/st [Standards]

RP - NOT IN FILE

SP - A72

JF - Preventing Chronic Disease

JA - Prev. Chronic Dis.

VL - 8

IS - 4

CY - United States

N2 - INTRODUCTION: Recreational and transportation infrastructure can promote physical activity among children and adolescents. The Play Across Boston community-based research project sought to estimate and compare playground renovation rates across Boston areas before and after a playground quality assessment, to describe changes in playground quality among a subset of parks, and to document features of local transportation infrastructure around parks. METHODS: We used an observational pretest-posttest design to estimate playground renovation rates among 103 city-operated parks. Renovation rates were calculated on the basis of annual city Parks Department capital budgets from fiscal years 1996 through 2007. We used the same design to describe changes between a 2000 to 2001 baseline assessment of playground quality and a 2007 follow-up measured via observation of a subsample of 18 low-scoring parks in disadvantaged areas. We used (2) analysis to compare percentages of playgrounds renovated across city areas before and after baseline assessment, logistic regression analysis to calculate odds ratios comparing renovation rates after baseline by city area, and paired t tests to compare playground quality at baseline and follow-up. RESULTS: Overall playground

renovation rates before (29%) and after (34%) baseline assessment were similar. Parks scoring low on playground quality at baseline were renovated after baseline at a higher rate than high-scoring playgrounds. After accounting for baseline playground quality, parks in disadvantaged areas were renovated at a rate similar to those in other areas. Playground quality scores improved between baseline (mean, 38.3; 95% confidence interval, 35.3-41.3) and 2007 in a subsample of previously low-scoring parks in disadvantaged areas.

CONCLUSION: The findings of the 2007 follow-up assessment indicate an equitable rate of playground renovation across city areas according to need

SN - 1545-1151

AD - Department of Society, Human Development, and Health, Harvard School of Public Health, Landmark Center, 401 Park Drive, Boston, MA 02215, USA. jbarrett@hsph.harvard.edu

UR - 21672396

ER -

TY - JOUR

ID - 184

T1 - Investigating children's physical activity and sedentary behavior using ecological momentary assessment with mobile phones

A1 - Dunton,G.F.

A1 - Liao,Y.

A1 - Intille,S.S.

A1 - Spruijt-Metz,D.

A1 - Pentz,M.

Y1 - 2011/06//

N1 - Dunton, Genevieve F. Liao, Yue. Intille, Stephen S. Spruijt-Metz, Donna. Pentz, Maryann Obesity (Silver Spring, Md.)

101264860

IM

Clinical Trial. Journal Article. Research Support, N.I.H., Extramural. Research Support, Non-U.S. Gov't. Validation Studies

English

KW - Medline

KW - Adolescent

KW - Adolescent Behavior

KW - Body Mass Index

KW - California

KW - Cellular Phone

KW - Child

KW - Child Behavior

KW - Feasibility Studies

KW - Humans

KW - Leisure Activities

KW - Male

KW - Monitoring

KW - Ambulatory/mt [Methods]

KW - Motor Activity

KW - Patient Compliance

KW - Patient Preference

KW - Pilot Projects

KW - Research Design

KW - Sedentary Lifestyle

KW - Self Report

KW - Time Factors

RP - NOT IN FILE

SP - 1205

EP - 1212

JF - Obesity



JA - Obesity (Silver.Spring)

VL - 19

IS - 6

CY - United States

N2 - The risk of obesity during childhood can be significantly reduced through increased physical activity and decreased sedentary behavior. Recent technological advances have created opportunities for the real-time measurement of these behaviors. Mobile phones are ubiquitous and easy to use, and thus have the capacity to collect data from large numbers of people. The present study tested the feasibility, acceptability, and validity of an electronic ecological momentary assessment (EMA) protocol using electronic surveys administered on the display screen of mobile phones to assess children's physical activity and sedentary behaviors. A total of 121 children (ages 9-13, 51% male, 38% at risk for overweight/overweight) participated in EMA monitoring from Friday afternoon to Monday evening during children's nonschool time, with 3-7 surveys/day. Items assessed current activity (e.g., watching TV/movies, playing video games, active play/sports/exercising). Children simultaneously wore an Actigraph GT2M accelerometer. EMA survey responses were time-matched to total step counts and minutes of moderate-to-vigorous physical activity (MVPA) occurring in the 30 min before each EMA survey prompt. No significant differences between answered and unanswered EMA surveys were found for total steps or MVPA. Step counts and the likelihood of 5+ min of MVPA were significantly higher during EMA-reported physical activity (active play/sports/exercising) vs. sedentary behaviors (reading/computer/homework, watching TV/movies, playing video games, riding in a car) ( $P < 0.001$ ). Findings generally support the acceptability and validity of a 4-day EMA protocol using mobile phones to measure physical activity and sedentary behavior in children during leisure time

SN - 1930-739X

AD - Department of Preventive Medicine, University of Southern California, Alhambra, California, USA.

dunton@usc.edu

UR - 21164502

ER -

TY - JOUR

ID - 185

T1 - The association between overweight and opportunity structures in the built environment: a multi-level analysis among elementary school youth in the PLAY-ON study

A1 - Leatherdale,S.T.

A1 - Poulidou,T.

A1 - Church,D.

A1 - Hobin,E.

Y1 - 2011/06//

N1 - Leatherdale, Scott T. Poulidou, Theodora. Church, Dana. Hobin, Erin

International journal of public health

101304551

IM

Journal Article. Multicenter Study. Research Support, Non-U.S. Gov't

English

KW - Medline

KW - Body Mass Index

KW - Child

KW - Cross-Sectional Studies

KW - Environment

KW - Environment Design

KW - Exercise

KW - Humans

KW - Logistic Models

KW - Ontario

KW - Overweight/ep [Epidemiology]

KW - Prevalence

KW - Risk Factors

KW - Schools

KW - Self Report

KW - Students

RP - NOT IN FILE

SP - 237

EP - 246

JF - International Journal of Public Health

JA - Int.J Public Health

VL - 56

IS - 3

CY - Switzerland

N2 - **OBJECTIVE:** To examine school-level opportunity structures of the built environment and student characteristics associated with being overweight. **METHODS:** Multi-level logistic regression analysis were used to examine the school- and student-level characteristics associated with the odds of a student being overweight among grade 5-8 students attending 30 elementary schools in Ontario, Canada, as part of the Play-Ontario (PLAY-ON) study. **RESULTS:** Significant between school random variation in overweight was identified [ $2(u) = 0.187 (0.084), P < 0.001$ ]; school-level differences accounted for 5.4% of the variability in the odds of a student being overweight. The more fast-food retailers there were surrounding a school, the more likely a student was to be overweight; students in grade 5 were at increased risk relative to students in grades 6-8. The more grocery stores there were surrounding a school, the more likely a student was to be overweight; students in grade 5 were at increased risk relative to students in grades 6-8. **CONCLUSIONS:** Developing a better understanding of the school- and student-level characteristics associated with overweight among youth is critical for informing intervention programs and policies

SN - 1661-8564

AD - Department of Population Studies and Surveillance, Cancer Care Ontario, 620 University Avenue, Toronto, ON M5G 2L7, Canada. scott.leatherdale@cancercare.on.ca

UR - 21046190

ER -

TY - JOUR

ID - 186

T1 - Do mothers' play behaviors moderate the associations between socioeconomic status and 24-month neurocognitive outcomes of toddlers born preterm or with low birth weight?

A1 - Iwath-Bart,J.E.

A1 - Poehlmann,J.A.

A1 - Miller,K.E.

A1 - Hilgendorf,A.E.

Y1 - 2011/04//

N1 - Dilworth-Bart, Janean E. Poehlmann, Julie A. Miller, Kyle E. Hilgendorf, Amy E

Journal of pediatric psychology

jl8, 7801773

IM

Journal Article. Research Support, N.I.H., Extramural. Research Support, Non-U.S. Gov't  
English

KW - Medline

KW - Attention

KW - Child Development

KW - Child

KW - Preschool

KW - Cognition

KW - Female

KW - Humans

KW - Infant

KW - Low Birth Weight/px [Psychology]

KW - Newborn

KW - Male

KW - Memory

KW - Short-Term

KW - Mother-Child Relations

KW - Mothers/px [Psychology]

KW - Neuropsychological Tests

KW - Play and Playthings/px [Psychology]

KW - Premature Birth/px [Psychology]

KW - Social Class

KW - Social Environment

RP - NOT IN FILE

SP - 289

EP - 300

JF - Journal of Pediatric Psychology

JA - J Pediatr Psychol.

VL - 36

IS - 3

CY - United States

N2 - OBJECTIVE: We examined whether neonatal risks and maternal scaffolding (i.e., task changes and flexibility) during a 16-month post-term play interaction moderated the association between socioeconomic status (SES), visual-spatial processing and emerging working memory assessed at 24 months post-term among 75 toddlers born preterm or low birth weight. METHOD: SES and neonatal risk data were collected at hospital discharge and mother-child play interactions were observed at 16-month post-term. General cognitive abilities, verbal/nonverbal working memory and visual-spatial processing data were collected at 24 months. RESULTS: Neonatal risks did not moderate the associations between SES and 24-month outcomes. However, lower mother-initiated task changes were related to better 24-month visual-spatial processing among children living in higher SES homes. Mothers' flexible responses to child initiated task changes similarly moderated the impact of SES on 24-month visual-spatial processing. CONCLUSION: Our results suggest that mothers' play behaviors differentially relate to child outcomes depending on household SES

SN - 1465-735X

AD - Department of Human Development and Family Studies, University of Wisconsin, 1305 Linden Drive, Madison, WI 53706-1523, USA. jedilworth@wisc.edu

UR - 20656763

ER -

TY - JOUR

ID - 187

T1 - Adolescents risky MP3-player listening and its psychosocial correlates

A1 - Vogel,I.

A1 - Brug,J.

A1 - Van der Ploeg,C.P.

A1 - Raat,H.

Y1 - 2011/04//

N1 - Vogel, Ineke. Brug, Johannes. Van der Ploeg, Catharina P B. Raat, Hein  
Health education research

bqp, 8608459

T

Journal Article. Research Support, Non-U.S. Gov't

English

KW - Medline

KW - Adolescent

KW - Adolescent Behavior/px [Psychology]

KW - Child

KW - Female

KW - Habits

KW - Hearing Loss

KW - Noise-Induced/et [Etiology]

KW - Noise-Induced/pc [Prevention & Control]

KW - Humans  
KW - MP3-Player/sn [Statistics & Numerical Data]  
KW - MP3-Player/td [Trends]  
KW - Male  
KW - Netherlands  
KW - Risk-Taking  
KW - Young Adult  
RP - NOT IN FILE

SP - 254

EP - 264

JF - Health Education Research

JA - Health Educ Res.

VL - 26

IS - 2

CY - England

N2 - Analogue to occupational noise-induced hearing loss, MP3-induced hearing loss may be evolving into a significant social and public health problem. To inform prevention strategies and interventions, this study investigated correlates of adolescents' risky MP3-player listening behavior primarily informed by protection motivation theory. We invited 1687 adolescents (12- to 19-year old) of Dutch secondary schools to complete questionnaires about their MP3-player listening, sociodemographic characteristics and presumed psychosocial determinants of MP3-player listening. Of all participants, 90% reported listening to music through earphones on MP3 players; 28.6% were categorized as listeners at risk for hearing loss due to estimated exposure of 89 dBA for  $\geq 1$  hour per day. Compared with listeners not at risk for hearing loss, listeners at risk were more likely not to live with both parents, to experience rewards of listening to high-volume levels, to report a high habit strength related to risky MP3 listening, and were less likely to be motivated to protect their hearing. Habit strength was the strongest correlate of risky listening behavior, suggesting that voluntary behavior change among adolescents might be difficult to achieve and that a multiple strategy approach may be needed to prevent MP3-induced hearing loss

SN - 1465-3648

AD - Department of Public Health, Erasmus MC, University Medical Center, PO Box 2040, Rotterdam 3000 CA, The Netherlands. i.vogel@erasmusmc.nl

UR - 21321009

ER -

TY - JOUR

ID - 188

T1 - Peer-related social competence of young children with Down syndrome

A1 - Guralnick,M.J.

A1 - Connor,R.T.

A1 - Johnson,L.C.

Y1 - 2011/01//

N1 - Guralnick, Michael J. Connor, Robert T. Johnson, L Clark  
American journal on intellectual and developmental disabilities

101492916

IM

Journal Article. Research Support, N.I.H., Extramural

English

KW - Medline

KW - Child

KW - Child Psychology

KW - Preschool

KW - Down Syndrome/px [Psychology]

KW - Family Health

KW - Female

KW - Friends/px [Psychology]

KW - Humans

KW - Male  
KW - Peer Group  
KW - Play and Playthings/px [Psychology]  
KW - Social Behavior  
RP - NOT IN FILE  
SP - 48  
EP - 64  
JF - American Journal on Intellectual & Developmental Disabilities  
JA - Am J Intellect.Dev.Disabil.  
VL - 116  
IS - 1  
CY - United States  
N2 - The peer-related social competence of children with Down syndrome was examined in an observational study. Dyadic interactions with peers of children with Down syndrome were compared with the dyadic interactions of matched groups of typically developing children and with playmates differing in both familiarity and social skills. Results suggested that both risk and protective factors influenced the peer interactions of children with Down syndrome. Recommendations are made for applying contemporary models of peer-related social competence to etiologic subgroups to better understand the mechanisms involved and to provide direction for the design of intervention programs  
SN - 1944-7515  
AD - Center on Human Development and Disability, University of Washington, Seattle, WA, USA.  
mjgural@u.washington.edu  
UR - 21291310  
ER -

TY - JOUR  
ID - 189  
T1 - Suspected motor problems and low preference for active play in childhood are associated with physical inactivity and low fitness in adolescence  
A1 - Kantomaa,M.T.  
A1 - Purtsi,J.  
A1 - Taanila,A.M.  
A1 - Remes,J.  
A1 - Viholainen,H.  
A1 - Rintala,P.  
A1 - Ahonen,T.  
A1 - Tammelin,T.H.  
Y1 - 2011///  
N1 - Kantomaa, Marko T. Purtsi, Jarno. Taanila, Anja M. Remes, Jouko. Viholainen, Helena. Rintala, Pauli. Ahonen, Timo. Tammelin, Tuija H  
PloS one  
101285081  
IM  
Journal Article. Research Support, N.I.H., Extramural. Research Support, Non-U.S. Gov't  
English  
KW - Medline  
KW - Adolescent  
KW - Child  
KW - Choice Behavior  
KW - Finland  
KW - Humans  
KW - Longitudinal Studies  
KW - Motor Activity  
KW - Physical Fitness/ph [Physiology]  
KW - Physical Fitness/px [Psychology]  
KW - Physical Fitness

KW - Prospective Studies

RP - NOT IN FILE

SP - e14554

JF - PLoS ONE [Electronic Resource]

JA - PLoS One

VL - 6

IS - 1

CY - United States

N2 - **BACKGROUND:** This prospective longitudinal study investigates whether suspected motor problems and low preference for active play in childhood are associated with physical inactivity and low cardiorespiratory fitness in adolescence. **METHODOLOGY/PRINCIPAL FINDINGS:** The study sample consisted of the Northern Finland Birth Cohort 1986 (NFBC 1986) composed of 5,767 children whose parents responded to a postal inquiry concerning their children's motor skills at age 8 years and who themselves reported their physical activity at age 16 years. Cardiorespiratory fitness was measured with a cycle ergometer test at age 16 years. Odds ratios (OR) and their 95% confidence intervals (95% CI) for the level of physical activity and fitness were obtained from multinomial logistic regression and adjusted for socio-economic position and body mass index. Low preference for active play in childhood was associated with physical inactivity (boys: OR 3.31, 95% CI 2.42-4.53; girls: OR 1.79, 95% CI 1.36-2.36) and low cardiorespiratory fitness (boys: OR 1.87, 95% CI 1.27-2.74; girls: OR 1.52, 95% CI 1.09-2.11) in adolescence. Suspected gross (OR 2.16, 95% CI 1.33-3.49) and fine (OR 1.88, 95% CI 1.35-2.60) motor problems were associated with physical inactivity among boys. Children with suspected motor problems and low preference for active play tended to have an even higher risk of physical inactivity in adolescence. **CONCLUSIONS/SIGNIFICANCE:** Low preference for active play in childhood was associated with physical inactivity and low cardiorespiratory fitness in adolescence. Furthermore, children with suspected motor problems and low preference for active play tended to have an even higher risk of physical inactivity in adolescence. Identification of children who do not prefer active play and who have motor problems may allow targeted interventions to support their motor learning and participation in active play and thereby promote their physical activity and fitness in later life

SN - 1932-6203

AD - LIKES - Research Center for Sport and Health Sciences, Jyväskylä, Finland. marko.kantomaa@likes.fi

UR - 21267447

ER -

TY - JOUR

ID - 190

T1 - Primary care strategies for promoting parent-child interactions and school readiness in at-risk families: the Bellevue Project for Early Language, Literacy, and Education Success

A1 - Mendelsohn,A.L.

A1 - Huberman,H.S.

A1 - Berkule,S.B.

A1 - Brockmeyer,C.A.

A1 - Morrow,L.M.

A1 - Dreyer,B.P.

Y1 - 2011/01//

N1 - Mendelsohn, Alan L. Huberman, Harris S. Berkule, Samantha B. Brockmeyer, Carolyn A. Morrow, Lesley M. Dreyer, Benard P

Archives of pediatrics & adolescent medicine

9422751, bwf

AIM, IM

Comparative Study. Journal Article. Randomized Controlled Trial. Research Support, N.I.H., Extramural. Research Support, Non-U.S. Gov't. Research Support, U.S. Gov't, Non-P.H.S.

English

KW - Medline

KW - Child Development/ph [Physiology]

KW - Child

KW - Preschool

KW - Confidence Intervals

KW - Early Intervention (Education)/og [Organization & Administration]

KW - Female

KW - Health Promotion/og [Organization & Administration]

KW - Health Status Disparities

KW - Hospitals

KW - Urban

KW - Humans

KW - Infant

KW - Newborn

KW - Language Development

KW - Learning

KW - Male

KW - New York City

KW - Parent-Child Relations

KW - Pediatrics/mt [Methods]

KW - Play Therapy/mt [Methods]

KW - Play and Playthings

KW - Poverty

KW - Primary Health Care/og [Organization & Administration]

KW - Program Evaluation

KW - Reference Values

KW - Risk Assessment

KW - Socioeconomic Factors

KW - Teaching Materials

KW - Time Factors

KW - Video Recording/mt [Methods]

RP - NOT IN FILE

SP - 33

EP - 41

JF - Archives of Pediatrics & Adolescent Medicine

JA - Arch.Pediatr Adolesc Med

VL - 165

IS - 1

CY - United States

N2 - OBJECTIVE: To determine the effects of pediatric primary care interventions on parent-child interactions in families with low socioeconomic status. DESIGN: In this randomized controlled trial, participants were randomized to 1 of 2 interventions (Video Interaction Project [VIP] or Building Blocks [BB]) or the control group. SETTING: Urban public hospital pediatric primary care clinic. PARTICIPANTS: Mother-newborn dyads enrolled post partum from November 1, 2005, through October 31, 2008. INTERVENTIONS: In the VIP group, mothers and newborns participated in 1-on-1 sessions with a child development specialist who facilitated interactions in play and shared reading by reviewing videos made of the parent and child on primary care visit days; learning materials and parenting pamphlets were also provided. In the BB group, parenting materials, including age-specific newsletters suggesting interactive activities, learning materials, and parent-completed developmental questionnaires, were mailed to the mothers. MAIN OUTCOME MEASURES: Parent-child interactions were assessed at 6 months with the StimQ-Infant and a 24-hour shared reading recall diary. RESULTS: A total of 410 families were assessed. The VIP group had a higher increased StimQ score (mean difference, 3.6 points; 95% confidence interval, 1.5 to 5.6 points; Cohen d, 0.51; 0.22 to 0.81) and more reading activities compared to the control group. The BB group also had an increased overall StimQ score compared with the control group (Cohen d, 0.31; 95% confidence interval, 0.03 to 0.60). The greatest effects for the VIP group were found for mothers with a ninth-grade or higher reading level (Cohen d, 0.68; 95% confidence interval, 0.33 to 1.03). CONCLUSIONS: The VIP and BB groups each led to increased parent-child interactions. Pediatric primary care represents a significant opportunity for enhancing developmental trajectories in at-risk children. TRIAL REGISTRATION: clinicaltrials.gov Identifier: NCT00212576

SN - 1538-3628

AD - Division of Developmental-Behavioral Pediatrics, Department of Pediatrics, New York University School of Medicine and Bellevue Hospital Center, New York, NY 10016, USA. alm5@nyu.edu

UR - 21199978

ER -

TY - JOUR

ID - 191

T1 - A potential new health risk from lead in used consumer products purchased in the United States

A1 - Sharmer,L.

A1 - Shackley,M.S.

A1 - Harding,A.K.

Y1 - 2010/12//

N1 - Sharmer, Laurel. Shackley, M Steven. Harding, Anna K

Journal of environmental health

iac, 0405525

IM

Journal Article. Multicenter Study. Research Support, Non-U.S. Gov't

English

KW - Medline

KW - Child

KW - Child Welfare

KW - Consumer Product Safety/lj [Legislation & Jurisprudence]

KW - Consumer Product Safety

KW - Environmental Pollutants/an [Analysis]

KW - Household Products/an [Analysis]

KW - Humans

KW - Lead/an [Analysis]

KW - Lead Poisoning/pc [Prevention & Control]

KW - Maximum Allowable Concentration

KW - Paint/an [Analysis]

KW - Play and Playthings

KW - United States

RP - NOT IN FILE

SP - 8

EP - 12

JF - Journal of Environmental Health

JA - J Environ.Health

VL - 73

IS - 5

CY - United States

N2 - The Lead Renovation, Repair, and Painting Rule and the Consumer Product Safety Improvement Act, both enacted in 2008, were intended to protect children from exposure to lead by setting federal limits on lead content. Neither of these federal actions, however, addresses a newly recognized pathway of exposure to lead from the use of used consumer products in the home. In the study described in this article, the authors purchased 28 used consumer items in the United States in 2004 and analyzed them for lead content using X-ray fluorescence technology. Nineteen of the items exceeded the federal standards for lead. The amount of lead in the items ranged from 745 parts per million (ppm) to 428,525 ppm. The authors' research shows that such items, which are easily purchased throughout the U.S., may contain surface lead concentrations in amounts greater than 700 times current federal limits. This article reveals an ongoing public health threat involved in exposure to lead that is not addressed by current laws or regulations. Addressing the risk involved in this threat requires continued research, public education, and targeted regulatory action

SN - 0022-0892

AD - Department of Community Health, State University of New York, Postdam, NY 13676, USA.

sharmela@potdam.edu

UR - 21189787

ER -

TY - JOUR



ID - 192

T1 - Association of adolescent choking game activity with selected risk behaviors

A1 - Dake,J.A.

A1 - Price,J.H.

A1 - Kolm-Valdivia,N.

A1 - Wielinski,M.

Y1 - 2010/11//

N1 - Dake, Joseph A. Price, James H. Kolm-Valdivia, Nicole. Wielinski, Margaret

Academic pediatrics

101499145

IM

Journal Article. Multicenter Study

English

KW - Medline

KW - Adolescent

KW - Adolescent Behavior

KW - Age Factors

KW - Airway Obstruction/px [Psychology]

KW - Child

KW - Female

KW - Humans

KW - Male

KW - Mental Disorders/ep [Epidemiology]

KW - Mental Disorders/px [Psychology]

KW - Midwestern United States/ep [Epidemiology]

KW - Play and Playthings

KW - Risk Factors

KW - Risk-Taking

KW - Substance-Related Disorders/ep [Epidemiology]

KW - Substance-Related Disorders/px [Psychology]

KW - Violence/px [Psychology]

KW - Violence/sn [Statistics & Numerical Data]

RP - NOT IN FILE

SP - 410

EP - 416

JF - Academic pediatrics

JA - Acad.Pediatr

VL - 10

IS - 6

CY - United States

N2 - OBJECTIVE: Previous research has recommended education for parents, teachers, and anticipatory guidance by pediatricians regarding participation in the so-called choking game, a potentially fatal behavior. The purpose of this study was to examine possible associations between selected demographic variables and risk behaviors with youth engagement in the choking game on the basis of secondary data analysis from a general adolescent health risk behavior survey. METHODS: Self-administered survey data from an adolescent needs assessment was used to assess choking game behavior between fall 2008 and fall 2009. The sample included 192 classrooms across 88 schools in a Midwestern state. RESULTS: Of the 3598 questionnaires distributed to middle and high school students, 3408 (95%) were returned completed. Participation rate in the choking game was 9%, with male participation (11%) greater than female participation (7%), and high school students (11%) more likely than middle school students (5%) to participate. Adjusted odds ratios found that the likelihood of middle school students engaging in the choking game were higher for older students, substance users, and those having lower grades. For high school students, adjusted odds ratios found that being older, substance use, and selected mental health issues (forced sex and attempted suicide) were most associated with choking activities. CONCLUSIONS: Engaging in the choking game was highly associated with abuse of substances, suggesting that youth engage in the choking game for the thrill-seeking experience of brief euphoria, a drug-related feeling. To reduce the potentially fatal consequences associated with this behavior, pediatricians should screen youths

and provide anticipatory guidance for higher-risk youths and their parents. Copyright 2010 Academic Pediatric Association. Published by Elsevier Inc. All rights reserved

SN - 1876-2867

AD - Department of Health and Recreation Professions, University of Toledo, Toledo, Ohio 43606, USA.

jdake@utnet.utoledo.edu

UR - 21075323

ER -

TY - JOUR

ID - 193

T1 - The crucial role of recess in schools

A1 - Ramstetter,C.L.

A1 - Murray,R.

A1 - Garner,A.S.

Y1 - 2010/11//

N1 - Ramstetter, Catherine L. Murray, Robert. Garner, Andrew S

The Journal of school health

k13, 0376370

IM, N

Journal Article

English

KW - Medline

KW - Adolescent

KW - Body Mass Index

KW - Child

KW - Child Welfare/sn [Statistics & Numerical Data]

KW - Exercise

KW - Female

KW - Health Promotion/og [Organization & Administration]

KW - Humans

KW - Male

KW - Obesity/ep [Epidemiology]

KW - Obesity/pc [Prevention & Control]

KW - Physical Education and Training/sn [Statistics & Numerical Data]

KW - Play and Playthings

KW - Public Policy

KW - School Health Services/og [Organization & Administration]

KW - Schools/og [Organization & Administration]

KW - United States/ep [Epidemiology]

RP - NOT IN FILE

SP - 517

EP - 526

JF - Journal of School Health

JA - J Sch Health

VL - 80

IS - 11

CY - United States

N2 - **BACKGROUND:** Recess is at the heart of a vigorous debate over the role of schools in promoting optimal child development and well-being. Reallocating time to accentuate academic concerns is a growing trend and has put recess at risk. Conversely, pressure to increase activity in school has come from efforts to combat childhood obesity. The purpose of this review was to examine the value of recess as an integral component of the school day. **METHODS:** A comprehensive review of recess-specific literature was conducted, beginning with a Google Scholar search, to cull definitions, position statements, and policy recommendations from national/international associations and organizations. A multi-database search followed. Additional articles were selected from reference lists. **RESULTS:** The search yielded a range of articles, from those focused on specific aspects of recess to those that examined multiple factors, including how to structure and conduct recess. Several

themes emerged supporting recess as beneficial for children's cognitive, social, emotional, and physical functioning. Optimal recess was well-supervised and safe. Crucial components were well-maintained playground equipment and well-trained supervisors. CONCLUSION: Recess serves a critical role in school as a necessary break from the rigors of academic challenges. Recess is a complement to, not a replacement for, physical education. Both promote activity and a healthy lifestyle; however, recess--particularly unstructured recess and free play--provides a unique contribution to a child's creative, social, and emotional development. From the perspective of children's health and well-being, recess time should be considered a child's personal time and should not be withheld for academic or punitive reasons. 2010, American School Health Association SN - 1746-1561

AD - Center for the Enhancement of Teaching and Learning, Health Promotion and Education, University of Cincinnati, Langsam 480, Mail Location 0033, PO Box 210033, Cincinnati, OH 45221-0033, USA.

ramstecl@ucmail.uc.edu

UR - 21039550

ER -

TY - JOUR

ID - 194

T1 - Trajectories of antisocial behaviour towards siblings predict antisocial behaviour towards peers

A1 - Ensor,R.

A1 - Marks,A.

A1 - Jacobs,L.

A1 - Hughes,C.

Y1 - 2010/11//

N1 - Ensor, Rosie. Marks, Alex. Jacobs, Lorna. Hughes, Claire

Journal of child psychology and psychiatry, and allied disciplines

hp3, 0375361

IM

Comparative Study. Journal Article. Research Support, Non-U.S. Gov't

English

KW - Medline

KW - Aggression

KW - Antisocial Personality Disorder/ep [Epidemiology]

KW - Antisocial Personality Disorder/px [Psychology]

KW - Bullying

KW - Child

KW - Child Behavior/px [Psychology]

KW - Preschool

KW - Educational Status

KW - Female

KW - Humans

KW - Interpersonal Relations

KW - Male

KW - Mothers

KW - Neuropsychological Tests

KW - Peer Group

KW - Personality Assessment

KW - Personality Development

KW - Play and Playthings/px [Psychology]

KW - Risk Factors

KW - Sex Factors

KW - Siblings/px [Psychology]

KW - Social Behavior

RP - NOT IN FILE

SP - 1208

EP - 1216

JF - Journal of Child Psychology & Psychiatry & Allied Disciplines

JA - J Child Psychol.Psychiatry

VL - 51

IS - 11

CY - England

N2 - **BACKGROUND:** Young siblings' antisocial behaviour is common yet its impact has received relatively little research attention. **METHODS:** We examined trajectories of antisocial behaviour for a socially diverse sample (n = 99, 58 boys and 41 girls) who were filmed with their older siblings (52 boys and 47 girls) at ages 3 and 6 and with unfamiliar peers at age 6. Latent growth models were used to analyse three indicators of antisocial behaviour (refusal to share/interact, bullying and harming). **RESULTS:** The average trajectory of antisocial behaviour towards siblings was stable and particularly high for boys with brothers and for children of mothers with no educational qualifications. Sustained and escalating antisocial behaviours towards siblings predicted bullying and refusals to share/interact with unfamiliar peers, independent of associations with concurrent antisocial behaviour towards sibling. **CONCLUSIONS:** These findings highlight the importance of a developmental perspective when examining antisocial behaviour between young siblings. 2010 The Authors. Journal of Child Psychology and Psychiatry 2010 Association for Child and Adolescent Mental Health  
SN - 1469-7610

AD - Centre for Family Research, University of Cambridge, Free School Lane, Cambridge, UK.

rad35@cam.ac.uk

UR - 20584100

ER -

TY - JOUR

ID - 195

T1 - Outdoor play: A survey of parent's perceptions of their child's safety

A1 - Kalish,M.

A1 - Banco,L.

A1 - Burke,G.

A1 - Lapidus,G.

Y1 - 2010/10//

N1 - Kalish, Meredith. Banco, Leonard. Burke, Georgine. Lapidus, Garry

The Journal of trauma

kaf, 0376373

AIM, IM

Journal Article

English

KW - Medline

KW - Adult

KW - Attitude

KW - Child

KW - Preschool

KW - Crime

KW - Environment Design

KW - Female

KW - Humans

KW - Male

KW - Middle Aged

KW - Parents/px [Psychology]

KW - Play and Playthings

KW - Residence Characteristics

KW - Safety

KW - Socioeconomic Factors

KW - Young Adult

RP - NOT IN FILE

SP - S218

EP - S222

JF - Journal of Trauma-Injury Infection & Critical Care

JA - J Trauma

VL - 69

IS - 4 Suppl

CY - United States

N2 - **BACKGROUND:** Anecdotal reports suggest that parents may be restricting outdoor play in response to a perceived lack of safety and fear of violence and crime in urban environments. The study objective was to determine whether parents who perceived their neighborhood as unsafe would be most likely to restrict their child's outdoor play and report the greatest worries related to neighborhood characteristics. **METHODS:** A convenience sample of primary caregivers of children aged 5 years to 7 years were recruited from a pediatric primary care center based at an urban academic children's hospital. Study participants completed a 23-question survey available in English and Spanish. **RESULTS:** Two hundred fifty-four parents completed the survey. Most were English speakers (69%), female (89%), and aged between 21 years and 35 years (76%). Sixty-two percent let their child play outside often or sometimes; whereas 19% reported never allowing their child to play outside. Parents were less likely to allow outside play as their degree of worry increased about traffic ( $p < 0.0001$ ), rundown parks ( $p < 0.003$ ), crime ( $p < 0.0001$ ), witnessing violence ( $p < 0.0001$ ), being a victim of violence ( $p < 0.0009$ ), drugs ( $p < 0.0001$ ), gangs ( $p < 0.004$ ), and weapons ( $p < 0.003$ ). Frequency of outdoor play was not correlated with the sex or age of the child or number of children in the family. Spanish speakers were less likely to allow outside play ( $p < 0.008$ ) but more likely to allow unsupervised play ( $p < 0.03$ ). **CONCLUSIONS:** Decreased frequency of outdoor play correlated with increased parental concerns about safety, however, many parents still report allowing outdoor play at least sometimes

SN - 1529-8809

AD - Connecticut Children's Medical Center, University of Connecticut School of Medicine, Hartford, USA

UR - 20938312

ER -

TY - JOUR

ID - 196

T1 - Playing with a child with ADHD: a focus on the playmates

A1 - Cordier,R.

A1 - Bundy,A.

A1 - Hocking,C.

A1 - Einfeld,S.

Y1 - 2010/09//

N1 - Cordier, Reinie. Bundy, Anita. Hocking, Clare. Einfeld, Stewart  
Scandinavian journal of occupational therapy

9502210

IM

Journal Article. Research Support, Non-U.S. Gov't

English

KW - Medline

KW - Age Factors

KW - Attention Deficit Disorder with Hyperactivity/px [Psychology]

KW - Child

KW - Preschool

KW - Empathy

KW - Female

KW - Health Status Indicators

KW - Humans

KW - Interpersonal Relations

KW - Male

KW - Peer Group

KW - Play and Playthings

KW - Sex Factors

KW - Siblings

RP - NOT IN FILE

SP - 191

EP - 199

JF - Scandinavian Journal of Occupational Therapy

JA - Scand.J Occup Ther

VL - 17

IS - 3

CY - England

N2 - Play is the context for acquiring social skills. While it is logical to suspect that the difficulties associated with ADHD would affect play, there is surprisingly little work in that area. Further, there is almost no previous research describing the playmates of children with ADHD. This study involved children with ADHD (n = 112) playing with a usual playmate (n = 112), and pairs of age-, ethnicity-, and sex-matched children (n = 126) playing together. In this paper, the authors interpret the data from the perspective of the playmates. The overall finding was that the play behavior of the playmates closely resembled that of the children with ADHD; it was characterized by low levels of empathy. A primary purpose of this paper is to explore possible explanations for this surprising finding. Two possible explanations are explored. First, children with ADHD are demanding playmates so that children who play with them mirror their negative behaviors. Second, although the playmates did not have ADHD, their play behaviors might reflect the known risk of negative behaviors reported amongst siblings and peers of children with ADHD. Evidence to support both explanations is presented and new lines of research are proposed to examine each possibility

SN - 1651-2014

AD - Faculty of Health Sciences, Discipline of Occupational Therapy, The University of Sydney, Australia

UR - 19670080

ER -

TY - JOUR

ID - 197

T1 - The Stamp-in-Safety programme, an intervention to promote better supervision of children on childcare centre playgrounds: an evaluation in an urban setting

A1 - Chelvakumar,G.

A1 - Sheehan,K.

A1 - Hill,A.L.

A1 - Lowe,D.

A1 - Mandich,N.

A1 - Schwebel,D.C.

Y1 - 2010/10//

N1 - Chelvakumar, Gayathri. Sheehan, Karen. Hill, Amy L. Lowe, Danita. Mandich, Nicole. Schwebel, David

C

Injury prevention : journal of the International Society for Child and Adolescent Injury Prevention

crz, 9510056

IM

Journal Article. Research Support, Non-U.S. Gov't

English

KW - Medline

KW - Accident Prevention

KW - Accidental Falls/pc [Prevention & Control]

KW - Accidental Falls/sn [Statistics & Numerical Data]

KW - Behavior Control

KW - Child Day Care Centers

KW - Child

KW - Preschool

KW - Equipment Design

KW - Female

KW - Humans

KW - Male

KW - Play and Playthings/in [Injuries]

KW - Social Environment

KW - United States/ep [Epidemiology]

RP - NOT IN FILE

SP - 352

EP - 354

JA - Injury Prevention

VL - 16

IS - 5

CY - England

N2 - Using a non-equivalent control group design, this report evaluated a previously studied behavioural intervention, the Stamp-in-Safety programme, which is designed to reduce the injury risk for young children on playgrounds at childcare centres by increasing the quality of adult supervision and rewarding children for safe play. In an urban, commercial childcare centre, 71 children aged 3-5 years and 15 teachers participated. Primary outcome measures were teacher verbalisations (warnings, explanations, redirects), teacher location (core, outskirt, or fringe of playground), child risk-taking behaviours (using equipment appropriately) and the number of injuries on the playground. Analyses revealed that the intervention had a modest positive effect in promoting safer teacher and child playground behaviours. This study reaffirms previous results that the Stamp-in-Safety programme is an effective method to decrease the risk of playground injuries at childcare centres

SN - 1475-5785

AD - Medical College of Wisconsin, Milwaukee, Wisconsin, USA

UR - 20587809

ER -

TY - JOUR

ID - 198

T1 - Safety standards and socioeconomic disparities in school playground injuries: a retrospective cohort study

A1 - Macpherson,A.K.

A1 - Jones,J.

A1 - Rothman,L.

A1 - Macarthur,C.

A1 - Howard,A.W.

Y1 - 2010///

N1 - Macpherson, Alison K. Jones, Jennifer. Rothman, Linda. Macarthur, Colin. Howard, Andrew W

BMC public health

100968562

IM

Journal Article

English

KW - Medline

KW - Child

KW - Cohort Studies

KW - Guidelines as Topic

KW - Humans

KW - Ontario/ep [Epidemiology]

KW - Play and Playthings/in [Injuries]

KW - Program Evaluation

KW - Retrospective Studies

KW - Safety/st [Standards]

KW - Social Class

KW - Wounds and Injuries/ep [Epidemiology]

KW - Wounds and Injuries/pc [Prevention & Control]

RP - NOT IN FILE

SP - 542

JA - BMC Public Health

VL - 10

CY - England

N2 - BACKGROUND: Playground injuries are fairly common and can require hospitalization and or surgery. Previous research has suggested that compliance with guidelines or standards can reduce the incidence of such

injuries, and that poorer children are at increased risk of playground injuries. **OBJECTIVE:** The objective of this study was to determine the association between playground injury and school socioeconomic status before and after the upgrading of playground equipment to meet CSA guidelines. **METHODS:** Injury data were collected from January 1998-December 1999 and January 2004 - June 2007 for 374 elementary schools in Toronto, Canada. The objective of this study was to investigate the effect of a program of playground assessment, upgrading, and replacement on school injury rates and socio-economic status. Injury rates were calculated for all injuries, injuries that did not occur on equipment, and injuries on play equipment. Poisson regression was performed to determine the relationship between injury rates and school socio-economic status. **RESULTS:** Prior to upgrading the equipment there was a significant relationship between socio-economic status and equipment-related injuries with children at poorer schools being at increased risk (Relative risk: 1.52 [95% CI = 1.24-1.86]). After unsafe equipment was upgraded, the relationship between injury and SES decreased and was no longer significant (RR 1.13 [95% CI = 0.95-1.32]). **CONCLUSIONS:** Improvements in playground equipment can result in an environment in which students from schools in poorer neighbourhoods are no longer at increased risk of injuries on play equipment

SN - 1471-2458

AD - York University, 4700 Keele Street, Toronto ON, Canada. alison3@yorku.ca

UR - 20825679

ER -

TY - JOUR

ID - 199

T1 - Negative and atypical story content themes depicted by children with behaviour problems

A1 - Wan,M.W.

A1 - Green,J.

Y1 - 2010/10//

N1 - Wan, Ming Wai. Green, Jonathan

Journal of child psychology and psychiatry, and allied disciplines

hp3, 0375361

IM

Journal Article

English

KW - Medline

KW - Adult

KW - Aggression/px [Psychology]

KW - Anger

KW - Child

KW - Child Behavior Disorders/px [Psychology]

KW - Depression/px [Psychology]

KW - Female

KW - Humans

KW - Internal-External Control

KW - Male

KW - Maternal Behavior/px [Psychology]

KW - Mother-Child Relations

KW - Mothers/px [Psychology]

KW - Play and Playthings/px [Psychology]

KW - Questionnaires

KW - Risk Factors

KW - Sex Factors

RP - NOT IN FILE

SP - 1125

EP - 1131

JF - Journal of Child Psychology & Psychiatry & Allied Disciplines

JA - J Child Psychol.Psychiatry

VL - 51

IS - 10



CY - England

N2 - BACKGROUND: Specific thematic content arising from children's doll play is often considered to give clinically meaningful information regarding their mental state, but has received little systematic enquiry. This exploratory study examined the negative and atypical content themes in the attachment story narratives of children with behaviour problems, and their associations with child symptomatology and parental depressed mood. METHOD: Videotaped mother-child attachment doll play completions of 77 children from a clinical sample were blind coded for negative content themes. Mothers completed questionnaires for maternal depression and child behaviour. RESULTS: Children rating positive for behaviour disorder were more likely to represent maternal injury, role reversal and marked maternal sadness. Severe behavioural symptoms were associated with more pervasive negative themes. Half of the overall sample depicted child accidents and maternal unresponsiveness, whereas child aggression, child anger and maternal absence were rare. Girls with depressed mothers showed an absence of particular negative representations (e.g., child sadness) compared to boys. CONCLUSIONS: Specific atypical themes are associated with the extent of child psychopathology and may be modified by exposure to maternal depressed mood. The methodological limitations in this exploratory study are also discussed

SN - 1469-7610

AD - Psychiatry Research Group, University of Manchester, UK. m.w.wan@manchester.ac.uk

UR - 20331493

ER -

TY - JOUR

ID - 200

T1 - Diabulimia and the role of school health personnel. [Review]

A1 - Hasken,J.

A1 - Kresl,L.

A1 - Nydegger,T.

A1 - Temme,M.

Y1 - 2010/10//

N1 - Hasken, Julie. Kresl, Laura. Nydegger, Teresa. Temme, Megan

The Journal of school health

k13, 0376370

IM, N

Journal Article. Review

English

KW - Medline

KW - Adolescent

KW - Child

KW - Child Welfare

KW - Diabetes Mellitus

KW - Type 1

KW - Directive Counseling

KW - Eating Disorders/pc [Prevention & Control]

KW - Female

KW - Health Education

KW - Health Personnel

KW - Humans

KW - Insulin/pd [Pharmacology]

KW - Male

KW - Nutritional Status

KW - Professional Role

KW - Risk-Taking

KW - School Health Services

KW - Weight Loss

RP - NOT IN FILE

SP - 465

EP - 469

JF - Journal of School Health

JA - J Sch Health

VL - 80

IS - 10

CY - United States

N2 - **BACKGROUND:** Diabulimia, the omission or reduction of insulin use by persons with type 1 diabetes, is a harmful method of weight control. The purpose of this article is to present school health personnel with the information they may need to become more aware of the possibility of diabulimia in their students-especially females-with type 1 diabetes. **METHODS:** A review of the somewhat limited medical and diabetes-related organizations' literature on diabulimia was conducted to establish the role that school health personnel could play in raising awareness of students with this condition as well as education for diabulimia prevention.

**RESULTS:** Since insulin encourages fat storage, many with type 1 diabetes have discovered the relationship between reducing the amount of insulin they take and corresponding weight loss. Improper regulation of needed insulin treatments poses serious health problems that may require immediate medical attention. **CONCLUSION:** School personnel, especially those in the Coordinated School Health Program areas of comprehensive school health education, school health services, and guidance and counseling services have key roles to play in the prevention and recognition of diabulimia in students with diabetes. 2010, American School Health Association

SN - 1746-1561

AD - Truman State University, Kirksville, MO 63501, USA. jmh588@truman.edu

UR - 20840655

ER -

TY - JOUR

ID - 201

T1 - Building a better playground

A1 - Barovick,H.

Y1 - 2010/08/09/

N1 - Barovick, Harriet

Time

9877130, bqn

K

News

English

KW - Medline

KW - Child

KW - Preschool

KW - Equipment Design

KW - Humans

KW - Play and Playthings

KW - Safety

KW - United States

RP - NOT IN FILE

SP - 45

EP - 46

JF - Time

VL - 176

IS - 6

CY - United States

SN - 0040-781X

UR - 20722333

ER -

TY - JOUR

ID - 202

T1 - Permanent play facilities in school playgrounds as a determinant of children's activity

A1 - Nielsen,G.

A1 - Taylor,R.  
 A1 - Williams,S.  
 A1 - Mann,J.  
 Y1 - 2010/07//  
 N1 - Nielsen, Glen. Taylor, Rachael. Williams, Sheila. Mann, Jim

Journal of physical activity & health  
 101189457

IM

Journal Article

English

KW - Medline

KW - Child

KW - Preschool

KW - Environment Design

KW - Exercise

KW - Humans

KW - Monitoring

KW - Ambulatory

KW - Play and Playthings

KW - Schools

RP - NOT IN FILE

SP - 490

EP - 496

JF - Journal of Physical Activity & Health

JA - J Phys Act.Health

VL - 7

IS - 4

CY - United States

N2 - **BACKGROUND:** To investigate whether the number of permanent playground facilities in schools influences objectively measured physical activity. **METHODS:** Physical activity was measured using Actical accelerometers over 2 to 5 days in 417 children (5-12 years) from 7 schools. The number of permanent play facilities likely to encourage physical activity in individuals or groups of children (eg, adventure playgrounds, swings, trees, playground markings, courts, sandpits) were counted on 2 occasions in each school. The surface area of each playground (m<sup>2</sup>) was also measured. **RESULTS:** The number of permanent play facilities in schools ranged from 14 to 35 and was positively associated with all measures of activity. For each additional play facility, average accelerometry counts were 3.8% (P < .001) higher at school and 2.7% (P < .001) higher overall. Each additional play facility was also associated with 2.3% (P = .001) or 4 minutes more moderate/vigorous activity during school hours and 3.4% (P < .001) more (9 minutes) over the course of the day. School playground area did not affect activity independent of the number of permanent play facilities. Findings were consistent across age and sex groups. **CONCLUSION:** Increasing the number of permanent play facilities at schools may offer a cost-effective and sustainable option for increasing physical activity in young children

SN - 1543-3080

AD - Dept of Exercise and Sport Sciences, University of Copenhagen, Denmark

UR - 20683091

ER -

TY - JOUR

ID - 203

T1 - Associations between neighborhood safety, availability of recreational facilities, and adolescent physical activity among Canadian youth

A1 - Nichol,M.

A1 - Janssen,I.

A1 - Pickett,W.

Y1 - 2010/07//

N1 - Nichol, Marianne. Janssen, Ian. Pickett, William

Journal of physical activity & health

101189457

IM

Journal Article

English

KW - Medline

KW - Adolescent

KW - Canada

KW - Child

KW - Exercise

KW - Female

KW - Health Behavior

KW - Humans

KW - Male

KW - Play and Playthings

KW - Residence Characteristics

KW - Safety

RP - NOT IN FILE

SP - 442

EP - 450

JF - Journal of Physical Activity & Health

JA - J Phys Act.Health

VL - 7

IS - 4

CY - United States

N2 - **BACKGROUND:** The safety of neighborhoods and availability of parks and facilities may influence adolescent physical activity independently or interactively. **METHODS:** 9114 Canadians in grades 6 to 10 completed the 2006 Health Behavior in School-Aged Children Survey. The outcome of interest was students' self-reported participation in moderate-to-vigorous physical activity outside of school. A composite scale based on questions measuring student perceptions of safety was used to capture individual perceptions of safety. In addition, schools were grouped into quintiles based on the mean of the perceived safety scale, used as a proxy for peer perceptions. The number of parks and recreational facilities within 5 km of schools was abstracted from a geographical information system. **RESULTS:** Moderate gradients in physical activity were observed according to individual and group perceptions of safety. Boys and girls with the highest perceptions of safety were 1.31 (95% CI: 1.17-1.45) and 1.45 (1.26-1.65) times more likely to be physically active, respectively, than those with the lowest perceptions. Compared with those who perceived the neighborhood as least safe, elementary students in higher quintiles were 1.31, 1.39, 1.37, and 1.56 times more likely to be physically active ( $P(\text{trend}) = 0.012$ ). Increased numbers of recreational features were not related to physical activity irrespective of neighborhood safety. **CONCLUSIONS:** Individual and group perceptions of neighborhood safety were modestly associated with adolescents' physical activity

SN - 1543-3080

AD - Dept of Community Health and Epidemiology, Queen's University, Kingston, Ontario, Canada

UR - 20683085

ER -

TY - JOUR

ID - 204

T1 - Noninvasive screening for risk factors of type 2 diabetes in young, rural, caucasian children

A1 - Peterson,S.

A1 - Sheffer,S.

A1 - Roth,S.L.

A1 - Bennett,P.A.

A1 - Lloyd,L.

Y1 - 2010/08//

N1 - Peterson, Sharon. Sheffer, Sarah. Roth, Sara Long. Bennett, Paul A. Lloyd, Les  
The Journal of school nursing : the official publication of the National Association of School Nurses  
bgs, 9206498

N

Journal Article

English

KW - Medline

KW - Adolescent

KW - Age Factors

KW - Body Mass Index

KW - Child

KW - Preschool

KW - Confidence Intervals

KW - Cross-Sectional Studies

KW - Diabetes Mellitus

KW - Type 2/di [Diagnosis]

KW - Type 2/ep [Epidemiology]

KW - Type 2/nu [Nursing]

KW - European Continental Ancestry Group/sn [Statistics & Numerical Data]

KW - Female

KW - Humans

KW - Illinois/ep [Epidemiology]

KW - Male

KW - Mass Screening/mt [Methods]

KW - Odds Ratio

KW - Prevalence

KW - Risk Factors

KW - Rural Population/sn [Statistics & Numerical Data]

KW - School Nursing

RP - NOT IN FILE

SP - 301

EP - 309

JF - Journal of School Nursing

JA - J Sch Nurs

VL - 26

IS - 4

CY - United States

N2 - School nurses play an important role in identifying students who are at risk for Type 2 diabetes mellitus (T2DM). Few studies have screened Caucasian students, and none have targeted rural, low-income, elementary children. The five noninvasive risk factors used for this study were family history, high body mass index (BMI) for age/sex, racial/ethnic background, hypertension, and acanthosis nigricans. Two thirds of those screened (n = 299) had at least one of the five risk factors for T2DM. Seventeen students (5.6% of those screened) had three or more of the five risk factors and were considered at risk for T2DM. Fifteen percent (n = 43) had hypertension or prehypertension, and 18% (n = 53) were morbidly obese. Hypertension and acanthosis nigricans were significantly associated with being at risk in morbidly obese students. School nurses play an important role as frontline health professionals who are aware that risk factors for T2DM exist in all schools, regardless of students' age, size of community, or ethnic background

SN - 1546-8364

AD - Department of Animal Science, Food and Nutrition, Southern Illinois University, Carbondale, Illinois, USA

UR - 20335231

ER -

TY - JOUR

ID - 205

T1 - A pilot study of maternal sensitivity in the context of emergent autism

A1 - Baker,J.K.

A1 - Messinger,D.S.

A1 - Lyons,K.K.

A1 - Grantz,C.J.

Y1 - 2010/08//

N1 - Baker, Jason K. Messinger, Daniel S. Lyons, Kara K. Grantz, Caroline J

Journal of autism and developmental disorders

7904301, hgw

IM

Journal Article. Research Support, N.I.H., Extramural. Research Support, Non-U.S. Gov't

English

KW - Medline

KW - Age Factors

KW - Child Behavior Disorders/px [Psychology]

KW - Child Development

KW - Child Development Disorders

KW - Pervasive/di [Diagnosis]

KW - Pervasive/px [Psychology]

KW - Child

KW - Preschool

KW - Humans

KW - Infant

KW - Language Development

KW - Mother-Child Relations

KW - Mothers/px [Psychology]

KW - Pilot Projects

KW - Play and Playthings/px [Psychology]

KW - Risk Factors

RP - NOT IN FILE

SP - 988

EP - 999

JF - Journal of Autism & Developmental Disorders

JA - J Autism Dev.Disord

VL - 40

IS - 8

CY - United States

N2 - Unstructured mother-toddler interactions were examined in 18-month-old high- and low-risk children subsequently diagnosed (n = 12) or not diagnosed (n = 21) with autism spectrum disorders (ASD) at 36 months. Differences in maternal sensitivity were not found as a function of emergent ASD status. A differential-susceptibility moderation model of child risk guided investigations linking maternal sensitivity to child behavior and language growth. Group status moderated the relation between sensitivity and concurrent child behavior problems, with a positive association present for children with emergent ASD. Maternal sensitivity at 18 months predicted expressive language growth from age 2 to 3 years among children with emergent ASD only. Findings underscore the importance of understanding parent-child interaction during this key period in the development of autism symptomatology

SN - 1573-3432

AD - Waisman Center, University of Wisconsin-Madison, Rm 533, Madison, WI, USA.

jbaker@waisman.wisc.edu

UR - 20130975

ER -

TY - JOUR

ID - 206

T1 - Clinical management of musculoskeletal injuries in active children and youth

A1 - Mazer,B.

A1 - Shrier,I.

A1 - Feldman,D.E.

A1 - Swaine,B.

A1 - Majnemer,A.

A1 - Kennedy,E.

A1 - Chilingaryan,G.

Y1 - 2010/07//

N1 - Mazer, Barbara. Shrier, Ian. Feldman, Debbie Ehrmann. Swaine, Bonnie. Majnemer, Annette. Kennedy, Eileen. Chilingaryan, Gevorg

Clinical journal of sport medicine : official journal of the Canadian Academy of Sport Medicine

b9t, 9103300

IM

Journal Article. Research Support, Non-U.S. Gov't

English

KW - Medline

KW - Adolescent

KW - Athletic Injuries/th [Therapy]

KW - Attitude of Health Personnel

KW - Child

KW - Decision Making

KW - Humans

KW - Parents

KW - Physical Therapy Specialty

KW - Physician's Practice Patterns

KW - Questionnaires

KW - Risk Assessment

KW - Sports Equipment

KW - Sports Medicine

RP - NOT IN FILE

SP - 249

EP - 255

JF - Clinical Journal of Sport Medicine

JA - Clin.J Sport Med

VL - 20

IS - 4

CY - United States

N2 - **OBJECTIVE:** To describe how different health care specialists manage musculoskeletal injury in children and examine factors influencing return to play decisions. **DESIGN:** National survey. **SETTING:** Secure Web site hosting online questionnaire. **PARTICIPANTS:** Medical doctors, physical therapists, and athletic therapists who were members of their respective sport medicine specialty organizations. **INDEPENDENT VARIABLES:** Professional affiliation and the effect of the following factors were examined: pushy parent, cautious parent, protective equipment, previous injury, musculoskeletal maturity, game importance, position played, team versus individual sport, and time since injury. **MAIN OUTCOME MEASURES:** Recommendation of return to activity after common injuries seen in children and adolescents as described in 5 vignettes; consistency of responses across vignettes. **RESULTS:** The survey was completed by 464 respondents (34%). There were several differences between the professional groups in their recommendations to return to activity. Most factors studied did not tend to influence the decision to return to activity, although protective equipment often increased the response to return sooner. The number of participants who would return a child to activity sooner or later for each factor varied greatly across the 5 vignettes, except for pushy parent or cautious parent. **CONCLUSIONS:** Management practices of sport medicine clinicians vary according to profession, child, clinical factors, and sport-related factors. Decisions regarding return to play vary according to 5 specific characteristics of each clinical case. These findings help establish areas of consensus and disagreement in the management of children with injuries and safe return to physical activity

SN - 1536-3724

AD - McGill University, School of Physical and Occupational Therapy, Montreal, Quebec, Canada.

barbara.mazer@mcgill.ca

UR - 20606509

ER -

TY - JOUR

ID - 207

T1 - Children's play after anaesthesia and surgery: background factors and associations to behaviour during anaesthetic induction

A1 - Proczkowska-Bjorklund,M.

A1 - Gustafsson,P.A.

A1 - Svedin,C.G.

Y1 - 2010/06//

N1 - Proczkowska-Bjorklund, Marie. Gustafsson, Per A. Svedin, Carl Goran

Journal of child health care : for professionals working with children in the hospital and community  
9806360, dcl

N

Journal Article. Research Support, Non-U.S. Gov't

English

KW - Medline

KW - Age Factors

KW - Anesthesia/px [Psychology]

KW - Child

KW - Child Behavior/px [Psychology]

KW - Child Psychology

KW - Preschool

KW - Female

KW - General Surgery

KW - Humans

KW - Male

KW - Patient Compliance

KW - Play and Playthings/px [Psychology]

KW - Preanesthetic Medication

KW - Shyness

KW - Videotape Recording

RP - NOT IN FILE

SP - 170

EP - 178

JF - Journal of Child Health Care

JA - J Child Health Care

VL - 14

IS - 2

CY - England

N2 - Children can experience anaesthetic induction as fearful and frightening and this can lead to postoperative behaviour changes and symptoms of high anxiety. A fearful experience can also lead to avoidant reactions due to raised negative emotions in situations similar to that, which evoked the fear. To analyse children's reactions after anaesthesia to anaesthetic play equipment, 49 children (three-six years old) were video-filmed during play with anaesthetic equipment 14 days after anaesthesia and surgery. The risk that the child avoided playing with anaesthetic equipment was increased if the child took the premedication unwillingly and if the child was younger. The risk for not telling about the experience was increased if the child took the premedication unwillingly and if the child showed signs of shyness. The risk for telling mostly unspecific memories increased if the child was younger and if the child showed signs of shyness. Avoidant reactions could be seen in 50 percent of the children. It is important to be aware of the characteristics of a vulnerable child (age, shyness) and to meet the child without raising negative emotions in any part of the anaesthetic process, in order to avoid negative reactions in future encounters

SN - 1741-2889

AD - Linkoping University, Sweden. marie.proczkowska.bjorklund@lj.se

UR - 20212059

ER -



TY - JOUR

ID - 208

T1 - Built environment, parents' perception, and children's vigorous outdoor play

A1 - Bringolf-Isler,B.

A1 - Grize,L.

A1 - Mader,U.

A1 - Ruch,N.

A1 - Sennhauser,F.H.

A1 - Braun-Fahrlander,C.

A1 - SCARPOL team.

Y1 - 2010/05//

N1 - Bringolf-Isler, Bettina. Grize, Leticia. Mader, Urs. Ruch, Nicole. Sennhauser, Felix H. Braun-Fahrlander, Charlotte. SCARPOL team

Preventive medicine

pm4, 0322116

IM

Journal Article. Research Support, Non-U.S. Gov't

English

KW - Medline

KW - Accidents

KW - Traffic

KW - Adolescent

KW - Age Factors

KW - Attitude to Health/eh [Ethnology]

KW - Attitude to Health

KW - Child

KW - Child Welfare/eh [Ethnology]

KW - Child Welfare/sn [Statistics & Numerical Data]

KW - Child Welfare

KW - Cross-Sectional Studies

KW - Environment Design

KW - Family Characteristics

KW - Female

KW - Geographic Information Systems

KW - Humans

KW - Male

KW - Multivariate Analysis

KW - Parents/ed [Education]

KW - Parents/px [Psychology]

KW - Play and Playthings

KW - Population Density

KW - Questionnaires

KW - Regression Analysis

KW - Residence Characteristics

KW - Safety

KW - Sex Factors

KW - Social Environment

KW - Statistics

KW - Nonparametric

KW - Switzerland

KW - Time Factors

KW - Urbanization

RP - NOT IN FILE

SP - 251

EP - 256

JA - Preventive Medicine

VL - 50

IS - 5-6

CY - United States

N2 - OBJECTIVES: To evaluate the combined effects and relative importance of socio-cultural factors as well as parents' subjectively perceived and objectively assessed environment on time children spent vigorously playing outdoors. METHODS: Cross-sectional study conducted in Berne, Biel-Bienne, and Payerne (Switzerland) during the school year 2004/2005. Included 1345 parental questionnaires from children out of three age groups (6/7, 9/10, and 13/14 years). A total of 1081 (80%) provided a home address, which could be linked to environmental data using a geographic information system (GIS). RESULTS: GIS-derived main street density in a buffer of 100 m around the home was inversely associated with time playing outdoors in adolescents and younger children, but only in more urbanized areas. In addition and independently of GIS-based main street density, parental concern about traffic safety was associated with less time playing outdoors in primary school children. Girls, adolescents, and children from the French speaking part of the country spent less time playing outdoors. A non-Swiss nationality and having younger siblings increased time playing vigorously outdoors in adolescents. CONCLUSION: In addition to socio-cultural factors, parents' perceptions and objectively measured environmental factors were significantly associated with the time spent vigorously playing outdoors. These associations differed by age group. Copyright (c) 2010 The Institute For Cancer Prevention. Published by Elsevier Inc. All rights reserved

SN - 1096-0260

AD - Swiss Tropical and Public Health Institute, Basel, Switzerland. Bettina.Bringolf@unibas.ch

UR - 20346370

ER -

TY - JOUR

ID - 209

T1 - Early identification of children at risk of unintentional injury: a sensation seeking scale for children 2-5 years of age

A1 - Morrongiello, B.A.

A1 - Sandomierski, M.

A1 - Valla, J.

Y1 - 2010/07//

N1 - Morrongiello, Barbara A. Sandomierski, Megan. Valla, Jasmina

Accident; analysis and prevention

acs, 1254476

IM

Journal Article. Research Support, Non-U.S. Gov't. Research Support, U.S. Gov't, P.H.S.

English

KW - Medline

KW - Accident Proneness

KW - Child Behavior/px [Psychology]

KW - Child

KW - Preschool

KW - Cross-Sectional Studies

KW - Female

KW - Humans

KW - Male

KW - Play and Playthings/px [Psychology]

KW - Pleasure

KW - Psychometrics

KW - Questionnaires

KW - Reproducibility of Results

KW - Risk Assessment

KW - Risk-Taking

KW - Wounds and Injuries/ep [Epidemiology]

KW - Wounds and Injuries/px [Psychology]

RP - NOT IN FILE

SP - 1332

EP - 1337

JF - Accident Analysis & Prevention

JA - Accid.Anal.Prev.

VL - 42

IS - 4

CY - England

N2 - **OBJECTIVE:** Sensation seeking is a personality attribute associated with injury in school-age children, adolescents, and adults. This study aimed to develop and evaluate the psychometric properties of a questionnaire measure of sensation seeking for young children 2-5 years of age. **METHODS:** Items tapping aspects of sensation seeking (Novelty Seeking, Behavioral Intensity, Thrill Seeking) were developed, content validation was completed by child development experts, and 72 parents then completed the Sensation Seeking Scale for Young Children (SSSYC) twice (3 months intervening) to establish internal and test-retest reliabilities. To assess criterion validity, scores were related to children's preferences for high versus low sensation seeking activities, their free play behavior in an indoor playroom, and to children's history of unintentional injuries. **RESULTS:** Indices of internal reliability and test-retest reliability were good and questionnaire scores positively correlated with sensation seeking behaviors during free play, preferences for high versus low sensation seeking activities, and injury measures, providing support for criterion validity. **CONCLUSION:** This initial evaluation of the SSSYC suggests that it is a psychometrically sound measure of sensation seeking. This scale may be useful for identifying high sensation seekers at young ages, providing the opportunity for early intervention to prevent unintentional injuries. Copyright 2010 Elsevier Ltd. All rights reserved

SN - 1879-2057

AD - Psychology Department, University of Guelph, Guelph, Ontario N1G 2W1, Canada.

bmorrong@uoguelph.ca

UR - 20441850

ER -

TY - JOUR

ID - 210

T1 - A review of state regulations to promote physical activity and safety on playgrounds in child care centers and family child care homes

A1 - Cradock,A.L.

A1 - O'Donnell,E.M.

A1 - Benjamin,S.E.

A1 - Walker,E.

A1 - Slining,M.

Y1 - 2010/03//

N1 - Cradock, Angie L I. O'Donnell, Emily M. Benjamin, Sara E. Walker, Elizabeth. Slining, Meghan

Journal of physical activity & health

101189457

IM

Comparative Study. Journal Article. Research Support, U.S. Gov't, P.H.S.

English

KW - Medline

KW - Caregivers/lj [Legislation & Jurisprudence]

KW - Caregivers/st [Standards]

KW - Child

KW - Child Care/lj [Legislation & Jurisprudence]

KW - Child Care/st [Standards]

KW - Child Welfare

KW - District of Columbia

KW - Government Regulation

KW - Health Promotion

KW - Humans

KW - Motor Activity

KW - Play and Playthings

KW - Safety/sn [Statistics & Numerical Data]

KW - State Government

KW - United States

KW - Virgin Islands of the United States

KW - Wounds and Injuries/pc [Prevention & Control]

RP - NOT IN FILE

SP - S108

EP - S119

JF - Journal of Physical Activity & Health

JA - J Phys Act.Health

VL - 7 Suppl 1

CY - United States

N2 - BACKGROUND: As interventions increasingly emphasize early child care settings, it is necessary to understand the state regulatory context that provides guidelines for outdoor physical activity and safety and sets standards for child care environments. METHODS: Researchers reviewed regulations for child care facilities for 50 states, the District of Columbia and the Virgin Islands. We compared state regulations with national standards for 17 physical activity- and safety-related items for outdoor playground settings outlined in Caring for Our Children: National Health and Safety Performance Standards: Guidelines for Out-of-Home Child Care Programs (CFOC). State regulations were coded as fully, partially or not addressing the CFOC standard and state-level summary scores were calculated. RESULTS: On average, state regulations fully addressed one-third of 17 CFOC standards in regulations for centers (34%) and family child care homes (27%). Data suggest insufficient attention to outdoor play area proximity and size, equipment height, surfacing, and inspections. CONCLUSIONS: Considerable variation exists among state regulations related to physical activity promotion and injury prevention within outdoor play areas. Many states' regulations do not comply with published national health and safety standards. Enhancing regulations is one component of a policy approach to promoting safe, physically active child care settings

SN - 1543-3080

AD - Dept. of Society, Human Development, and Health, Harvard School of Public Health, Boston, MA, USA

UR - 20440004

ER -

TY - JOUR

ID - 211

T1 - Association of anemia, child and family characteristics with elevated blood lead concentrations in preschool children from Montevideo, Uruguay

A1 - Queirolo,E.I.

A1 - Ettinger,A.S.

A1 - Stoltzfus,R.J.

A1 - Kordas,K.

Y1 - 2010/04//

N1 - Queirolo, Elena I. Ettinger, Adrienne S. Stoltzfus, Rebecca J. Kordas, Katarzyna

Archives of environmental & occupational health

101282564

AIM, IM

Journal Article. Research Support, Non-U.S. Gov't

English

KW - Medline

KW - Age Factors

KW - Anemia/ci [Chemically Induced]

KW - Child

KW - Preschool

KW - Educational Status

KW - Environmental Exposure/ae [Adverse Effects]

KW - Family Characteristics

KW - Female

KW - Hemoglobins/an [Analysis]

KW - Humans

KW - Infant

KW - Lead/bl [Blood]

KW - Lead Poisoning/co [Complications]

KW - Male

KW - Maternal Age

KW - Occupational Exposure/ae [Adverse Effects]

KW - Play and Playthings

KW - Uruguay/ep [Epidemiology]

RP - NOT IN FILE

SP - 94

EP - 100

JF - Archives of Environmental & Occupational Health

JA - Arch.Environ.Occup Health

VL - 65

IS - 2

CY - United States

N2 - Elevated blood lead levels (BPbs) have been identified in Uruguayan children in the La Teja neighborhood of Montevideo, but the extent of lead exposure in other city areas is unknown. Sources and predictors of exposure also remain understudied in this population. In 2007, the authors screened lead and hemoglobin levels in capillary blood of 222 preschool children from several areas of Montevideo, Uruguay, and identified predictors of elevated BPbs. Mean BPb was 9.0 +/- 6.0 microg/dL and 32.9% of children had levels >or= 10microg/dL. Mean hemoglobin level was 10.5 +/- 1.5 g/dL, with 44.1% having levels <10.5g/dL. Older child age, hemoglobin <10.5g/dL, and putting fingers/toys in the mouth were associated with higher BPbs. Young maternal age, less education, father's job with potential risk of lead exposure, and fewer family possessions were also associated with higher BPbs. Pediatric lead exposure is a public health problem in Uruguay, with children experiencing elevated BPbs at a young age

SN - 1933-8244

AD - Center for Research, Catholic University of Uruguay, Montevideo, Uruguay Clinic for Environmental Contaminants, Pereira Rossell Hospital, Montevideo, Uruguay

UR - 20439228

ER -

TY - JOUR

ID - 212

T1 - The representation of fathers by children of depressed mothers: refining the meaning of parentification in high-risk samples

A1 - Woolgar,M.

A1 - Murray,L.

Y1 - 2010/05//

N1 - Woolgar, Matthew. Murray, Lynne

Journal of child psychology and psychiatry, and allied disciplines

hp3, 0375361

IM

Journal Article. Research Support, Non-U.S. Gov't

English

KW - Medline

KW - Child Behavior/px [Psychology]

KW - Child Development

KW - Child of Impaired Parents/px [Psychology]

KW - Child

KW - Preschool

KW - Depressive Disorder/px [Psychology]

KW - Family Conflict/px [Psychology]

KW - Father-Child Relations

KW - Fathers/px [Psychology]

KW - Female

KW - Humans

KW - Male

KW - Mothers/px [Psychology]

KW - Risk Factors

KW - Sex Factors

RP - NOT IN FILE

SP - 621

EP - 629

JF - Journal of Child Psychology & Psychiatry & Allied Disciplines

JA - J Child Psychol.Psychiatry

VL - 51

IS - 5

CY - England

N2 - BACKGROUND: Children's representations of mothers in doll-play are associated with child adjustment. Despite the importance of fathers for children's adjustment, especially in the context of maternal psychopathology, few studies have considered children's representations of their fathers. METHOD: We examined the portrayal of fathers by 5-year-old children of depressed (N = 55) and non-depressed (N = 39) mothers in a doll-play procedure concerning family experience. RESULTS: Children gave equal prominence in their play to mothers and fathers. Representations of fathers were unrelated to maternal mood, but were associated with parental conflict. Representations of child care for the father that was unreciprocated predicted poor child adjustment in school, but only in children exposed to maternal postnatal depression.

CONCLUSIONS: It may be clinically useful to consider children's distinctive representations of their mother and father; but the concept of parentification in relation to risk and resilience effects requires refinement

SN - 1469-7610

AD - Institute of Psychiatry, Denmark Hill, London, SE5 8AF, UK. Matt.Woolgar@iop.kcl.ac.uk

UR - 19788554

ER -

TY - JOUR

ID - 213

T1 - Short-term effects of playing computer games on attention

A1 - Tahiroglu,A.Y.

A1 - Celik,G.G.

A1 - Avci,A.

A1 - Seydaoglu,G.

A1 - Uzel,M.

A1 - Altunbas,H.

Y1 - 2010/05//

N1 - Tahiroglu, Aysegul Yolga. Celik, Gonca Gul. Avci, Ayse. Seydaoglu, Gulsah. Uzel, Mehtap. Altunbas, Handan

Journal of attention disorders

9615686

IM

Journal Article. Research Support, Non-U.S. Gov't

English

KW - Medline

KW - Attention

KW - Child

KW - Cognition

KW - Female

KW - Humans

KW - Learning

KW - Male

KW - Play and Playthings

KW - Time Factors

KW - Video Games

RP - NOT IN FILE

SP - 668

EP - 676

JF - Journal of Attention Disorders

JA - J Atten.Disord

VL - 13

IS - 6

CY - United States

N2 - **OBJECTIVE:** The main aim of the present study is to investigate the short-term cognitive effects of computer games in children with different psychiatric disorders and normal controls. **METHOD:** One hundred one children are recruited for the study (aged between 9 and 12 years). All participants played a motor-racing game on the computer for 1 hour. The TBAG form of the Stroop task was administered to all participants twice, before playing and immediately after playing the game. **RESULTS:** Participants with improved posttest scores, compared to their pretest scores, used the computer on average 0.67 +/- 1.1 hr/day, while the average administered was measured at 1.6 +/- 1.4 hr/day and 1.3 +/- 0.9 hr/day computer use for participants with worse or unaltered scores, respectively. According to the regression model, male gender, younger ages, duration of daily computer use, and ADHD inattention type were found to be independent risk factors for worsened posttest scores. **CONCLUSION:** Time spent playing computer games can exert a short-term effect on attention as measured by the Stroop test

SN - 1557-1246

AD - Cukurova University, Adana, Turkey. ayolga@gmail.com

UR - 19773602

ER -

TY - JOUR

ID - 214

T1 - An analysis of risk factors of non-fatal drowning among children in rural areas of Guangdong Province, China: a case-control study

A1 - Ma,W.J.

A1 - Nie,S.P.

A1 - Xu,H.F.

A1 - Xu,Y.J.

A1 - Song,X.L.

A1 - Guo,Q.Z.

A1 - Zhang,Y.R.

Y1 - 2010//

N1 - Ma, Wen Jun. Nie, Shao Ping. Xu, Hao Feng. Xu, Yan Jun. Song, Xiu Ling. Guo, Qiao Zhi. Zhang, Yu Run

BMC public health

100968562

IM

Journal Article. Research Support, Non-U.S. Gov't

English

KW - Medline

KW - Accident Prevention/mt [Methods]

KW - Adult

KW - Case-Control Studies

KW - Child

KW - China/ep [Epidemiology]

KW - Drowning/ep [Epidemiology]

KW - Drowning/et [Etiology]

KW - Female

KW - Fresh Water

KW - Humans

KW - Male

KW - Play and Playthings

KW - Risk Factors

KW - Rural Population/sn [Statistics & Numerical Data]

KW - Sex Factors

KW - Swimming

RP - NOT IN FILE

SP - 156

JA - BMC Public Health

VL - 10

CY - England

N2 - BACKGROUND: Drowning is a major cause of morbidity and mortality for children, yet non-fatal drowning remains poorly understood. The aim of this study was to explore potential modifiable risk factors of non-fatal drowning among children in rural areas of China. METHODS: A cross-sectional survey was first conducted to obtain non-fatal drowning cases, and 7432 students in grades three to eight from 17 schools participated in the cross sectional survey. Of these, 805 students reported that they experienced non-fatal drowning in the previous year. Then 368 cases were selected randomly to participate in a 1:1 matched case-control study. Each drowning case was matched by one control with the same sex and similar age (the gap less than 2 years) who was selected randomly from the same class. RESULTS: Boys were more likely to be involved in non-fatal drowning. Non-fatal drowning most often happened in the afternoon (65.1%) and natural bodies of water were the most common sites of drowning (71.1%). Swimming, diving and playing in natural waters were the leading activities that preceded non-fatal drowning. The significant risk factors for non-fatal drowning were swimming in natural waters without adult supervision (OR = 3.40, 95% CI: 1.92-6.03), playing in or beside natural waters (OR = 2.08, 95% CI: 1.17-3.70) and poor swimming skills (OR = 2.74, 95% CI: 1.14-6.62). However, the following variables were protective factors: supervisor aged 30 years or over (OR = 0.20, 95% CI: 0.09-0.49) and no water activities (OR = 0.36, 95% CI: 0.18-0.70). CONCLUSIONS: The reduction in dangerous water activities, swimming training and enhancement in supervision among children might decrease the risk of non-fatal drowning

SN - 1471-2458

AD - Department of Non-communicable Disease Control and Prevention, Center for Disease Control and Prevention of Guangdong Province, China. mwj68@tom.com

UR - 20334694

ER -

TY - JOUR

ID - 215

T1 - [Are children and adolescents of today more sedentary?]. [German]

A1 - Staub,A.

Y1 - 2010/03//

N1 - Staub, Angelika

Kinderkrankenschwester : Organ der Sektion Kinderkrankenpflege / Deutsche Gesellschaft für Sozialpädiatrie und Deutsche Gesellschaft für Kinderheilkunde

awq, 8305989

N

Journal Article

German

KW - Medline

KW - Adolescent

KW - Child

KW - Child Development

KW - Preschool

KW - Chronic Disease/nu [Nursing]

KW - Chronic Disease/pc [Prevention & Control]

KW - Germany

KW - Humans

KW - Motor Activity



KW - Motor Skills  
KW - Physical Fitness  
KW - Play and Playthings  
KW - Psychosocial Deprivation  
KW - Risk Factors  
RP - NOT IN FILE  
SP - 118  
JF - Kinderkrankenschwester  
VL - 29  
IS - 3  
CY - Germany  
SN - 0723-2276  
AD - AngelikaStaub@web.de  
UR - 20364661  
ER -

TY - JOUR  
ID - 216  
T1 - Childhood obesity and the built environment.[Erratum appears in *Pediatr Ann.* 2010 Jun;39(6):331]  
A1 - Razani,N.  
A1 - Tester,J.  
Y1 - 2010/03//  
N1 - Razani, Nooshin. Tester, June  
Pediatric annals  
oub, 0356657  
IM  
Journal Article  
English  
KW - Medline  
KW - Acanthosis Nigricans  
KW - Child  
KW - Environment Design  
KW - Health Promotion  
KW - Humans  
KW - Life Style  
KW - Motor Activity  
KW - Obesity/ep [Epidemiology]  
KW - Obesity/pc [Prevention & Control]  
KW - Pediatrics  
KW - Physician's Role  
KW - Play and Playthings  
KW - Poverty  
KW - Safety  
KW - Social Environment  
KW - Suburban Population  
RP - NOT IN FILE  
SP - 133  
EP - 139  
JF - Pediatric Annals  
JA - *Pediatr Ann.*  
VL - 39  
IS - 3  
CY - United States  
SN - 0090-4481  
AD - Adolescent Medicine Department, Children's Hospital & Research Center, Oakland, CA, USA.  
nrzani@mail.cho.org

UR - 20302244

ER -

TY - JOUR

ID - 217

T1 - Television viewing, computer game play and book reading during meals are predictors of meal skipping in a cross-sectional sample of 12-, 14- and 16-year-olds

A1 - Custers,K.

A1 - Van den,Bulck J.

Y1 - 2010/04//

N1 - Custers, Kathleen. Van den Bulck, Jan

Public health nutrition

9808463, dgy

IM

Journal Article

English

KW - Medline

KW - Adolescent

KW - Belgium

KW - Body Mass Index

KW - Books

KW - Child

KW - Computers

KW - Cross-Sectional Studies

KW - Feeding Behavior

KW - Female

KW - Humans

KW - Male

KW - Play and Playthings

KW - Prevalence

KW - Questionnaires

KW - Television

KW - Video Games

RP - NOT IN FILE

SP - 537

EP - 543

JF - Public Health Nutrition

JA - Public Health Nutr

VL - 13

IS - 4

CY - England

N2 - **OBJECTIVE:** To examine whether television viewing, computer game playing or book reading during meals predicts meal skipping with the aim of watching television, playing computer games or reading books (media meal skipping). **DESIGN:** A cross-sectional study was conducted using a standardized self-administered questionnaire. Analyses were controlled for age, gender and BMI. **SETTING:** Data were obtained from a random sample of adolescents in Flanders, Belgium. **SUBJECTS:** Seven hundred and ten participants aged 12, 14 and 16 years. **RESULTS:** Of the participants, 11.8 % skipped meals to watch television, 10.5 % skipped meals to play computer games and 8.2 % skipped meals to read books. Compared with those who did not use these media during meals, the risk of skipping meals in order to watch television was significantly higher for those children who watched television during meals (2.9 times higher in those who watched television during at least one meal a day). The risk of skipping meals for computer game playing was 9.5 times higher in those who played computer games weekly or more while eating, and the risk of meal skipping in order to read books was 22.9 times higher in those who read books during meals less than weekly. The more meals the respondents ate with the entire family, the less likely they were to skip meals to watch television. **CONCLUSIONS:** The use of media during meals predicts meal skipping for using that same medium. Family meals appear to be inversely related to meal skipping for television viewing

SN - 1475-2727

AD - Leuven School for Mass Communication Research and Leuven Food Science and Nutrition Research Centre (LFoRCe), Katholieke Universiteit Leuven, Leuven, Belgium. kathleen.custers@soc.kuleuven.be

UR - 19772688

ER -

TY - JOUR

ID - 218

T1 - Nonspecific low back pain during childhood: a retrospective epidemiological study of risk factors

A1 - Kaspiris,A.

A1 - Grivas,T.B.

A1 - Zafiropoulou,C.

A1 - Vasiliadis,E.

A1 - Tsadira,O.

Y1 - 2010/03//

N1 - Kaspiris, Angelos. Grivas, Theodoros B. Zafiropoulou, Crisi. Vasiliadis, Elias. Tsadira, Olia

Journal of clinical rheumatology : practical reports on rheumatic & musculoskeletal diseases

9518034

IM

Journal Article

English

KW - Medline

KW - Adolescent

KW - Age Factors

KW - Body Height

KW - Child

KW - Female

KW - Greece/ep [Epidemiology]

KW - Health Surveys

KW - Humans

KW - Low Back Pain/ep [Epidemiology]

KW - Low Back Pain/et [Etiology]

KW - Male

KW - Overweight

KW - Prevalence

KW - Retrospective Studies

KW - Sex Factors

RP - NOT IN FILE

SP - 55

EP - 60

JF - JCR: Journal of Clinical Rheumatology

JA - J

VL - 16

IS - 2

CY - United States

N2 - **OBJECTIVES:** In contrast to what was believed in the past, nonspecific low back pain is a fairly frequent condition in children, whose pathophysiology remains unclear as yet. Although many factors have been implicated in its development, results are often contradictory. **METHODS:** Our study aims to examine most of the reasons investigated in the international literature, as well as the previously unexamined impact of passive smoking in its clinical appearance. It is a retrospective study that investigates the symptom of nonspecific low back pain during a 12-month period before the visit of children to our department. The research included 692 children aged 7.5 to 14 years. The data were collected using a semi-structured questionnaire, which included a mix of open and closed questions, followed by physical examination during their visit. **RESULTS:** A total of 153 children were considered to present nonspecific low back pain during the previous year. The determinant factors appear to be greater age, the male sex, larger height, increased weight, dissatisfaction with school chairs, the clinical presentation of back pain in at least 1 parent, and coexisting anatomic orthopedic conditions. On the

contrary, the weight of the school bag, the way in which it was carried and participation in sports, as well as the time spent by children in front of the TV or PC playing video or play station games, did not appear to have a statistically significant correlation with its appearance. In general, passive smoking does not appear to be a risk factor ( $P[r] = 0.341$ ), and does not seem to play a leading role in the etiology of the condition. Furthermore, even the heaviness of parental smoking (over 20 cigarettes a day) does not seem to alter the appearance of the disease. The effect of nonspecific low back pain in children's activities was measured using Hannover Functional Ability and Rolland Morris questionnaires, appropriately modified to childhood, where he found a moderate or severe restriction of activity in 23.52% (score >5) and 19.61% (score >6), respectively.

**CONCLUSIONS:** The data analysis shows that nonspecific low back pain in children is a benign disorder with an unknown pathophysiological mechanism. Many anthropometric characteristics and environmental factors are implicated, but to a different degree each time. Passive smoking as well as the heaviness thereof does not appear to play an important role in its clinical presentation. Further investigation is deemed necessary to determine the existence of other risk factors, as well as the level of their participation in the condition's pathophysiology

SN - 1536-7355

AD - Department of Trauma and Orthopaedics, Thriasio General Hospital-NHS, Attica, Greece.

angkaspiris@upatras.gr

UR - 20130481

ER -

TY - JOUR

ID - 219

T1 - Constituent year: a new consideration for injury risk in Canadian youth ice hockey

A1 - Wattie,N.

A1 - Cobley,S.P.

A1 - Macpherson,A.

A1 - Montelpare,W.J.

A1 - McKenna,J.

A1 - Howard,A.

A1 - Baker,J.

Y1 - 2010/03//

N1 - Wattie, Nick. Cobley, Stephen P. Macpherson, Alison. Montelpare, William J. McKenna, Jim. Howard, Andrew. Baker, Joseph

Clinical journal of sport medicine : official journal of the Canadian Academy of Sport Medicine

b9t, 9103300

IM

Journal Article

English

KW - Medline

KW - Adolescent

KW - Age Factors

KW - Canada

KW - Child

KW - Competitive Behavior

KW - Databases

KW - Factual

KW - Hockey/in [Injuries]

KW - Humans

KW - Logistic Models

KW - Retrospective Studies

KW - Risk Assessment

RP - NOT IN FILE

SP - 113

EP - 116

JF - Clinical Journal of Sport Medicine

JA - Clin.J Sport Med

VL - 20

IS - 2

CY - United States

N2 - OBJECTIVE: To examine if chronological age within Canadian youth ice hockey's 2-year age bands influences the proportion of injury. DESIGN: Retrospective secondary data analyses. PARTICIPANTS: Information on 4736 injured youth ice hockey players (10-15 years old) reported by the Canadian Hospitals Injury Reporting Prevention Program (CHIRPP) and 4959 (12-15 years old) injured players reported by the Hockey Canada Insurance Database (HCID). MAIN OUTCOME MEASURES: Proportions of injuries according to constituent year (first vs second year of participation within 2-year youth ice hockey age bands). INDEPENDENT VARIABLES: The influence of age band (Atom, 10/11; Pee wee, 12/13; Bantam, 14/15) and level of competitive play on constituent year injury proportions were examined. RESULTS: Injured Atom and Pee wee players (CHIRPP) were more likely to be in constituent year 2 (Atom: odds ratio [OR], 1.72; 95% confidence interval [CI], 1.46-2.03; Pee wee: OR, 1.25; 95% CI, 1.10-1.42). Injured players (HCID) at the highest tiers of competitive play were more likely to be in constituent year 2 (eg, Pee wee: OR, 2.91; 95% CI, 1.92-4.41; Bantam: 1.89; 95% CI, 1.46-2.46). CONCLUSION: Constituent year may be a factor in determining injury risk and may be relevant to those managing the risk of injury for youth ice hockey players

SN - 1536-3724

AD - Carnegie Faculty of Sport and Education, Leeds Metropolitan University, Leeds, United Kingdom.

n.wattie@leedsmet.ac.uk

UR - 20215893

ER -

TY - JOUR

ID - 220

T1 - The elephant in the playground: confronting lead-contaminated soils as an important source of lead burdens to urban populations

A1 - Filippelli,G.M.

A1 - Laidlaw,M.A.

Y1 - 2010//

N1 - Filippelli, Gabriel M. Laidlaw, Mark A

Perspectives in biology and medicine

ozo, 0401132

IM

Journal Article

English

KW - Medline

KW - Child

KW - Preschool

KW - Environmental Exposure/ae [Adverse Effects]

KW - Environmental Exposure/an [Analysis]

KW - Geography

KW - Health Policy

KW - Humans

KW - Lead/an [Analysis]

KW - Lead/bl [Blood]

KW - Lead Poisoning/bl [Blood]

KW - Lead Poisoning/et [Etiology]

KW - Play and Playthings

KW - Poverty

KW - Soil Pollutants/ae [Adverse Effects]

KW - Soil Pollutants/an [Analysis]

KW - United States

KW - Urban Population

RP - NOT IN FILE

SP - 31

EP - 45

JF - Perspectives in Biology & Medicine

JA - Perspect.Biol.Med

VL - 53

IS - 1

CY - United States

N2 - Although significant headway has been made over the past 50 years in understanding and reducing the sources and health risks of lead, the incidence of lead poisoning remains shockingly high in urban regions of the United States. At particular risk are poor people who inhabit the polluted centers of our older cities without the benefits of adequate nutrition, education, and access to health care. To provide a future with fewer environmental and health burdens related to lead, we need to consider the multiple pathways of lead exposure in children, including their continued contact with dust derived from inner-city soils. Recent research into the causes of seasonal variations in blood-lead levels among children has confirmed the importance of soil in lead exposure. "Capping" lead-contaminated soil with lead-free soil or soil amendment appears to be a simple and cost-effective way to reduce the lead load for urban youth

SN - 1529-8795

AD - Department of Earth Sciences, Indiana University-Purdue University Indianapolis (IUPUI), Indianapolis, IN 46205, USA. gfilippe@iupui.edu

UR - 20173294

ER -

TY - JOUR

ID - 221

T1 - Violence in youth sports: hazing, brawling and foul play. [Review]

A1 - Fields,S.K.

A1 - Collins,C.L.

A1 - Comstock,R.D.

Y1 - 2010/01//

N1 - Fields, S K. Collins, C L. Comstock, R D

British journal of sports medicine

0432520

IM

Journal Article. Review

English

KW - Medline

KW - Adolescent

KW - Aggression/px [Psychology]

KW - Child

KW - Competitive Behavior

KW - Dangerous Behavior

KW - Humans

KW - Sports/px [Psychology]

KW - Sports/sn [Statistics & Numerical Data]

KW - Violence/px [Psychology]

KW - Violence/sn [Statistics & Numerical Data]

RP - NOT IN FILE

SP - 32

EP - 37

JF - British Journal of Sports Medicine

JA - BJSM.online.

VL - 44

IS - 1

CY - England

N2 - By separating hazing, brawling, and foul play and failing to recognise that their connection to sport binds them together into a cohesive subset of sport injury and youth violence, past research has failed to show how sports-related violence is a broad example of interpersonal violence. The acceptance of violence within the sporting culture may, in part, explain why sports-related violence has not yet been widely recognised as a public health concern. This review shows that sports-related violence, including hazing, brawling and foul play, occurs

among youth athletes of all ages and in a variety of different sports. The few studies to address this issue have all acknowledged the dangers of sports-related violence; however, no incident tracking method has been developed. Future research must provide accurate national estimates of the incidence of sports-related violence among youth, identify associated risk factors, evaluate preventive interventions and identify effective methods of distributing and implementing evidence-based interventions. Monitoring the magnitude and distribution of the burden of sports-related violence and building the scientific infrastructure necessary to support the development and widespread application of effective sports-related prevention interventions are essential first steps toward a reduction in the incidence of sports-related violence

SN - 1473-0480

AD - College of Education, School of Physical Activity and Educational Services, The Ohio State University, Columbus, OH 43205, USA

UR - 19858113

ER -

TY - JOUR

ID - 222

T1 - Test-retest reliability of the National Program for Playground Safety Report Card

A1 - Xethali,V.

A1 - Christoforidis,C.

A1 - Kambas,A.

A1 - Aggelousis,N.

A1 - Fatouros,I.

Y1 - 2009/12//

N1 - Xethali, Vasiliki. Christoforidis, Christos. Kambas, Antonis. Aggelousis, Nikolaos. Fatouros, Ioannis  
International journal of injury control and safety promotion

101247254

IM

Journal Article

English

KW - Medline

KW - Child

KW - Equipment Safety

KW - Humans

KW - Observer Variation

KW - Play and Playthings

KW - Reproducibility of Results

KW - Risk Assessment/st [Standards]

KW - Safety/st [Standards]

RP - NOT IN FILE

SP - 249

EP - 251

JF - International Journal of Injury Control & Safety Promotion

JA - Int.J Inj.Contr.Saf Promot

VL - 16

IS - 4

CY - England

SN - 1745-7319

AD - Department of Physical Education and Sport Science, Democritus University of Thrace, Thrace, Komotini, Greece

UR - 20183704

ER -

TY - JOUR

ID - 223

T1 - Update on "the choking game"

A1 - Andrew,T.A.

A1 - Macnab,A.  
A1 - Russell,P.  
Y1 - 2009/12//  
N1 - Andrew, Thomas A. Macnab, Andrew. Russell, Patricia  
The Journal of pediatrics  
jlz, 0375410  
AIM, IM  
Journal Article  
English  
KW - Medline  
KW - Adolescent  
KW - Airway Obstruction/co [Complications]  
KW - Airway Obstruction/ep [Epidemiology]  
KW - Airway Obstruction/px [Psychology]  
KW - Asphyxia/co [Complications]  
KW - Asphyxia/ep [Epidemiology]  
KW - Asphyxia/px [Psychology]  
KW - Child  
KW - Child Behavior/px [Psychology]  
KW - Female  
KW - Humans  
KW - Male  
KW - Play and Playthings  
KW - Risk-Taking  
KW - United States/ep [Epidemiology]  
RP - NOT IN FILE  
SP - 777  
EP - 780  
JF - Journal of Pediatrics  
JA - J Pediatr  
VL - 155  
IS - 6  
CY - United States  
SN - 1097-6833  
AD - Office of the Chief Medical Examiner, Concord, NH 03301, USA. thomas.andrew@doj.nh.gov  
UR - 19914429  
ER -  
  
TY - JOUR  
ID - 224  
T1 - Brief report: Young children's risk of unintentional injury: a comparison of mothers' and fathers' supervision beliefs and reported practices  
A1 - Morrongiello,B.A.  
A1 - Walpole,B.  
A1 - McArthur,B.A.  
Y1 - 2009/11//  
N1 - Morrongiello, Barbara A. Walpole, Beverly. McArthur, Brae Anne  
Journal of pediatric psychology  
jl8, 7801773  
IM  
Journal Article. Research Support, Non-U.S. Gov't  
English  
KW - Medline  
KW - Child  
KW - Preschool  
KW - Culture



KW - Female  
 KW - Gender Identity  
 KW - Health Surveys  
 KW - Humans  
 KW - Male  
 KW - Maternal Behavior/px [Psychology]  
 KW - Ontario  
 KW - Parenting/px [Psychology]  
 KW - Paternal Behavior  
 KW - Play and Playthings  
 KW - Questionnaires  
 KW - Risk-Taking  
 KW - Safety  
 KW - Self Care/px [Psychology]  
 KW - Wounds and Injuries/ep [Epidemiology]  
 KW - Wounds and Injuries/pc [Prevention & Control]  
 KW - Wounds and Injuries/px [Psychology]  
 RP - NOT IN FILE  
 SP - 1063  
 EP - 1068  
 JF - Journal of Pediatric Psychology  
 JA - J Pediatr Psychol.  
 VL - 34  
 IS - 10  
 CY - United States  
 N2 - OBJECTIVE: There is increasing interest in understanding how parent supervision influences young children's risk of injury, but nearly all of this research has been conducted with mothers. The present study compared first-time mothers' and fathers' supervisory beliefs and reported practices, and related these scores to parental reports of their child's history of injuries. METHODS: Mothers and fathers of children 2-5 years each independently completed a telephone interview and previously validated questionnaires about their supervisory beliefs and practices and their child's history of injuries. RESULTS: Mothers and fathers provided similar reports of their child's injuries (minor, medically attended) and scored similarly on various supervision indices. Despite these similarities, the way mothers' and fathers' supervision indices related to children's injury history scores differed. Children's frequency of minor and medically attended injuries was predicted from maternal supervisory scores but not from paternal scores. CONCLUSIONS: Maternal supervision has more impact on children's risk of injury than paternal supervision, possibly because mothers spend more time with children than fathers  
 SN - 1465-735X  
 AD - Psychology Department, University of Guelph, Guelph, Ontario, Canada. bmorrong@uoguelph.ca  
 UR - 19276175  
 ER -  
  
 TY - JOUR  
 ID - 225  
 T1 - Design of the iPlay study: systematic development of a physical activity injury prevention programme for primary school children  
 A1 - Collard,D.C.  
 A1 - Chinapaw,M.J.  
 A1 - van,Mechelen W.  
 A1 - Verhagen,E.A.  
 Y1 - 2009///  
 N1 - Collard, Dorine C M. Chinapaw, Mai J M. van Mechelen, Willem. Verhagen, Evert A L M  
 Sports medicine (Auckland, N.Z.)  
 8412297, spo  
 IM

Journal Article. Research Support, Non-U.S. Gov't  
English

KW - Medline

KW - Accident Prevention/mt [Methods]

KW - Accidents

KW - Athletic Injuries/ec [Economics]

KW - Athletic Injuries/pc [Prevention & Control]

KW - Child

KW - Faculty

KW - Female

KW - Focus Groups

KW - Health Promotion

KW - Health Services Needs and Demand

KW - Humans

KW - Interviews as Topic

KW - Male

KW - Motor Activity

KW - Needs Assessment

KW - Netherlands

KW - Play and Playthings/in [Injuries]

KW - Play and Playthings

KW - Program Development

KW - Program Evaluation

KW - Questionnaires

KW - Schools

KW - Social Marketing

KW - Students

RP - NOT IN FILE

SP - 889

EP - 901

JF - Sports Medicine

JA - Sports Med

VL - 39

IS - 11

CY - New Zealand

N2 - Health benefits of physical activity in children are well known. However, a drawback is the risk of physical activity-related injuries. Children are at particular risk for these injuries, because of a high level of exposure. Because of the high prevalence of physical activity injuries and the negative short- and long-term consequences, prevention of these injuries in children is important. This article describes how we systematically developed a school-based physical activity injury prevention programme using the intervention mapping (IM) protocol. IM describes a process for developing theory- and evidence-based health promotion programmes. The development can be described in six steps: (i) perform a needs assessment; (ii) identify programme and performance objectives; (iii) select methods and strategies; (iv) develop programme; (v) adopt and implement; and (vi) evaluate. First, the results of the needs assessment showed the injury problem in children and the different risk factors for physical activity injuries. Based on the results of the needs assessment the main focus of the injury prevention programme was described. Second, the overall programme objective of the injury prevention programme was defined as reducing the incidence of lower extremity physical activity injuries. Third, theoretical methods and practical strategies were selected to accomplish a decrease in injury incidence. The theoretical methods used were active learning, providing cues and scenario-based risk information, and active processing of information. The practical strategy of the injury prevention programme was an 8-month course about injury prevention to be used in physical education classes in primary schools. Fourth, programme materials that were used in the injury prevention programme were developed, including newsletters for children and parents, posters, exercises to improve motor fitness, and an information website. Fifth, an implementation plan was designed in order to ensure that the prevention programme would be implemented, adopted and sustained over time. Finally, an evaluation plan was designed. The injury prevention programme is being evaluated in a cluster randomized controlled trial with more than 2200 children from 40 primary schools

throughout the Netherlands. The IM process is a useful process for developing an injury prevention programme. Based on the steps of the IM we developed an 8-month injury prevention programme to be used in physical education classes of primary schools

SN - 0112-1642

AD - EMGO Institute for Health and Care Research and Department of Public and Occupational Health, VU University Medical Center, Amsterdam, the Netherlands

UR - 19827858

ER -

TY - JOUR

ID - 226

T1 - Return to play? Practical considerations for young athletes with cardiovascular disease. [Review] [60 refs]

A1 - Anderson,B.R.

A1 - Vetter,V.L.

Y1 - 2009/09//

N1 - Anderson, B R. Vetter, V L

British journal of sports medicine

0432520

IM

Journal Article. Review

English

KW - Medline

KW - Adolescent

KW - Adult

KW - Child

KW - Death

KW - Sudden

KW - Cardiac/et [Etiology]

KW - Cardiac/pc [Prevention & Control]

KW - Defibrillators

KW - Exercise/ph [Physiology]

KW - Exercise/px [Psychology]

KW - Heart Diseases/co [Complications]

KW - Heart Diseases/px [Psychology]

KW - Heart Diseases/th [Therapy]

KW - Humans

KW - Physical Education and Training/mt [Methods]

KW - Practice Guidelines as Topic

KW - Risk Factors

KW - Schools

KW - Sports/ph [Physiology]

KW - Sports/px [Psychology]

KW - Young Adult

RP - NOT IN FILE

SP - 690

EP - 695

JF - British Journal of Sports Medicine

JA - BJSM.online.

VL - 43

IS - 9

CY - England

N2 - Sports activities are an important part of the daily life of young persons. For a small proportion of those with cardiac conditions, sports participation can result in sudden cardiac arrest. Children and adolescents often participate in both organised and spontaneous play, for which activity guidelines are needed when a condition known to cause sudden cardiac death is identified. This article examines the current guidelines that provide recommendations for sports participation by young persons with cardiovascular disease and reviews the current

information on risks of physical activity for those with specific cardiac conditions. The goal of the practitioner is to balance the risks of restriction from physical activity with the benefits of participation. Some practical recommendations are offered for consideration, along with potential alternatives to absolute restriction.

[References: 60]

SN - 1473-0480

AD - University of Pennsylvania School of Medicine, Pennsylvania, USA

UR - 19734504

ER -

TY - JOUR

ID - 227

T1 - Through the eyes of children: engaging primary school-aged children in creating supportive school environments for physical activity and nutrition

A1 - Fitzgerald,E.

A1 - Bunde-Birouste,A.

A1 - Webster,E.

Y1 - 2009/08//

N1 - Fitzgerald, Emma. Bunde-Birouste, Anne. Webster, Emma

Health promotion journal of Australia : official journal of Australian Association of Health Promotion Professionals

9710936

IM

Journal Article

English

KW - Medline

KW - Child

KW - Preschool

KW - Consumer Participation

KW - Exercise

KW - Female

KW - Focus Groups

KW - Food Habits

KW - Health Behavior

KW - Health Promotion

KW - Humans

KW - Male

KW - Play and Playthings

KW - Risk Reduction Behavior

KW - School Health Services

KW - Schools

RP - NOT IN FILE

SP - 127

EP - 132

JF - Health Promotion Journal of Australia

JA - HEALTH PROMOT J AUST

VL - 20

IS - 2

CY - Australia

N2 - ISSUES ADDRESSED: This paper presents a qualitative study of physical activity, eating and drinking experiences of children at Wellington Public School, NSW. The study was designed and implemented to inform school programs and policies with a goal of fostering a supportive and healthy environment at the school.

METHODS: The study involved use of focus groups, drawings and photovoice with 37 students from Kindergarten to Year 6 to determine problems, underlying causes and possible student-led interventions to enhance the school physical activity and nutritional environment.

RESULTS: Students considered play as related to fun games with friends. Sport was associated with structured, competitive types of physical activity. Infants class students preferred play, while primary students reported a preference for semi-structured and

structured activities. Suggestions to improve school playing areas mirrored these preferences. The children suggested strategies for increasing fruit, vegetable and water consumption during the school day.

**CONCLUSION:** The students were keen to explore ways to increase physical activity opportunities and develop a supportive nutritional environment at school. Simple, easy to implement suggestions were among the outcomes of the study, reinforcing the importance of including students' views in healthy school program and policy development

SN - 1036-1073

AD - Greater Western Area Health Service, New South Wales. Emma.Fitzgerald@gwahs.health.nsw.gov.au

UR - 19642961

ER -

TY - JOUR

ID - 228

T1 - Community-based interventions to optimize early childhood development in low resource settings.

[Review] [90 refs]

A1 - Maulik,P.K.

A1 - Darmstadt,G.L.

Y1 - 2009/08//

N1 - Maulik, P K. Darmstadt, G L

Journal of perinatology : official journal of the California Perinatal Association

jfp, 8501884

IM

Journal Article. Review

English

KW - Medline

KW - Child

KW - Preschool

KW - Delivery of Health Care

KW - Developing Countries

KW - Developmental Disabilities/th [Therapy]

KW - Early Intervention (Education)/ec [Economics]

KW - Early Intervention (Education)/mt [Methods]

KW - Humans

KW - Infant

KW - Newborn

KW - Mother-Child Relations

KW - Play and Playthings

KW - Poverty Areas

RP - NOT IN FILE

SP - 531

EP - 542

JF - Journal of Perinatology

JA - J Perinatol.

VL - 29

IS - 8

CY - United States

N2 - **OBJECTIVE:** Interventions targeting the early childhood period (0 to 3 years) help to improve neuro-cognitive functioning throughout life. Some of the more low cost, low resource-intensive community practices for this age-group are play, reading, music and tactile stimulation. This research was conducted to summarize the evidence regarding the effectiveness of such strategies on child development, with particular focus on techniques that may be transferable to developing countries and to children at risk of developing secondary impairments. **STUDY DESIGN:** PubMed, PsycInfo, Embase, ERIC, CINAHL and Cochrane were searched for studies involving the above strategies for early intervention. Reference lists of these studies were scanned and other studies were incorporated based on snow-balling. **RESULT:** Overall, 76 articles corresponding to 53 studies, 24 of which were randomized controlled trials, were identified. Sixteen of those studies were from low- and middle-income countries. Play and reading were the two commonest interventions and showed positive

impact on intellectual development of the child. Music was evaluated primarily in intensive care settings. Kangaroo Mother Care, and to a lesser extent massage, also showed beneficial effects. Improvement in parent-child interaction was common to all the interventions. CONCLUSION: Play and reading were effective interventions for early childhood interventions in low- and middle-income countries. More research is needed to judge the effectiveness of music. Kangaroo Mother Care is effective for low birth weight babies in resource poor settings, but further research is needed in community settings. Massage is useful, but needs more rigorous research prior to being advocated for community-level interventions. [References: 90]

SN - 1476-5543

AD - Department of Mental Health, Bloomberg School of Public Health, Johns Hopkins University, Baltimore, MD 21205, USA

UR - 19404276

ER -

TY - JOUR

ID - 229

T1 - Head Start children's lifestyle behaviors, parental perceptions of weight, and body mass index

A1 - Hudson,C.E.

A1 - Cherry,D.J.

A1 - Ratcliffe,S.J.

A1 - McClellan,L.C.

Y1 - 2009/08//

N1 - Hudson, Cindy E. Cherry, Donna J. Ratcliffe, Sarah J. McClellan, Lynx C

Journal of pediatric nursing

jns, 8607529

IM, N

Journal Article. Research Support, N.I.H., Extramural. Research Support, Non-U.S. Gov't

English

KW - Medline

KW - Alabama/ep [Epidemiology]

KW - Body Mass Index

KW - Body Weight

KW - Child Welfare

KW - Child

KW - Preschool

KW - Cross-Sectional Studies

KW - Diet

KW - Early Intervention (Education)

KW - Female

KW - Humans

KW - Life Style

KW - Male

KW - Obesity/ep [Epidemiology]

KW - Parents/px [Psychology]

KW - Prevalence

KW - Questionnaires

KW - Risk Factors

RP - NOT IN FILE

SP - 292

EP - 301

JF - Journal of Pediatric Nursing

JA - J Pediatr Nurs

VL - 24

IS - 4

CY - United States

N2 - This study examined lifestyle behaviors (food intake, active play, and screen time), parental perception of children's weight, and body mass index (BMI) of children enrolled in Head Start. Ninety-six parent-child dyads

participated. Obesity prevalence (15.6%) was higher than the national average (10.4%); however, most parents (86.5%) of obese children did not perceive their children as obese. Regardless of BMI, food intake and active play levels generally did not meet recommended guidelines. Further, children who were less active were more likely to eat snacks ( $\chi^2 = 6.24, p < .05$ ). The role of pediatric nurses in counseling and referring Head Start families is explored

SN - 1532-8449

AD - College of Nursing, Medical University of South Carolina, Charleston, SC, USA. hudsonc@musc.edu

UR - 19632506

ER -

TY - JOUR

ID - 230

T1 - Predicting preschoolers' social-cognitive play behavior: attachment, peers, temperament, and physiological regulation

A1 - Porter,C.L.

Y1 - 2009/04//

N1 - Porter, Christin L

Psychological reports

qf6, 0376475

IM

Comparative Study. Journal Article

English

KW - Medline

KW - Adolescent

KW - Adult

KW - Biological Markers

KW - Child Behavior/px [Psychology]

KW - Child

KW - Preschool

KW - Cognition

KW - Discriminant Analysis

KW - Female

KW - Heart/ir [Innervation]

KW - Heart/ph [Physiology]

KW - Humans

KW - Interpersonal Relations

KW - Male

KW - Object Attachment

KW - Peer Group

KW - Personality Assessment

KW - Play and Playthings

KW - Probability

KW - Q-Sort

KW - Questionnaires

KW - Shyness

KW - Social Behavior

KW - Social Support

KW - Sociometric Techniques

KW - Temperament

KW - Vagus Nerve/ph [Physiology]

RP - NOT IN FILE

SP - 517

EP - 528

JF - Psychological Reports

JA - Psychol.Rep.

VL - 104

IS - 2

CY - United States

N2 - Research on children's social-cognitive play typologies (i.e., active and passive forms of solitary and social play) suggests links of early play behaviors and later social development and risk status. To date, few studies have examined simultaneously suspected links between children's social-cognitive play types and factors believed to shape these early social-play behaviors. This study examined a simultaneous model of individual (temperament, physiology) and relational variables (attachment, peer networks) believed to influence children's social-cognitive play types, including individual characteristics drawn from the Child Behavior Questionnaire which measures dimensions of shyness and impulsivity, a lab-based assessment of social withdrawal, and physiological markers linked to social regulation (cardiac vagal tone and vagal regulation). Children's attachment status to parents was gathered using Q-Sort methodology, and a measure of previous peer network size was obtained from parents' reports to examine potential links between relational history and social-cognitive play types. Predictive discriminant function analysis showed that children's (N = 54, age range 35 to 58 months) social-cognitive play was better predicted on the basis of multiple independent variables than individual, zero-order relations. When predicting children's social-cognitive play typologies, a multidimensional view which encompasses both individual characteristics and social-relational variables may best predict social-cognitive play types and help understanding of children's social trajectories

SN - 0033-2941

AD - 2093 JFSB, School of Family Life, Brigham Young University, Provo, UT 84602, USA.

chris\_porter@byu.edu

UR - 19610482

ER -

TY - JOUR

ID - 231

T1 - Rationale, design and methods for a randomised and controlled trial to investigate whether home access to electronic games decreases children's physical activity

A1 - Straker,L.M.

A1 - Abbott,R.A.

A1 - Piek,J.P.

A1 - Pollock,C.M.

A1 - Davies,P.S.

A1 - Smith,A.J.

Y1 - 2009///

N1 - Straker, Leon M. Abbott, Rebecca A. Piek, Jan P. Pollock, Clare M. Davies, Peter S. Smith, Anne J

BMC public health

100968562

IM

Journal Article. Randomized Controlled Trial. Research Support, Non-U.S. Gov't

English

KW - Medline

KW - Attitude to Health

KW - Child

KW - Electrical Equipment and Supplies

KW - Energy Metabolism

KW - Exercise

KW - Female

KW - Humans

KW - Male

KW - Motor Activity

KW - Video Games/px [Psychology]

KW - Video Games

RP - NOT IN FILE

SP - 212

JA - BMC Public Health

VL - 9



CY - England

**N2 - BACKGROUND:** Many children are reported to have insufficient physical activity (PA) placing them at greater risk of poor health outcomes. Participating in sedentary activities such as playing electronic games is widely believed to contribute to less PA. However there is no experimental evidence that playing electronic games reduces PA. There is also no evidence regarding the effect of different types of electronic games (traditional sedentary electronic games versus new active input electronic games) on PA. Further, there is a poor understanding about how characteristics of children may moderate the impact of electronic game access on PA and about what leisure activities are displaced when children play electronic games. Given that many children play electronic games, a better understanding of the effect of electronic game use on PA is critical to inform child health policy and intervention. **METHODS:** This randomised and controlled trial will examine whether PA is decreased by access to electronic games and whether any effect is dependent on the type of game input or the child's characteristics. Children aged 10-12 years (N = 72, 36 females) will be recruited and randomised to a balanced ordering of 'no electronic games', 'traditional' electronic games and 'active' electronic games. Each child will participate in each condition for 8 weeks, and be assessed prior to participation and at the end of each condition. The primary outcome is PA, assessed by Actical accelerometers worn for 7 days on the wrist and hip. Energy expenditure will be assessed by the doubly labelled water technique and motor coordination, adiposity, self-confidence, attitudes to technology and PA and leisure activities will also be assessed. A sample of 72 will provide a power of > 0.9 for detecting a 15 mins difference in PA (sd = 30 mins). **DISCUSSION:** This is the first such trial and will provide critical information to understand whether access to electronic games affects children's PA. Given the vital importance of adequate PA to a healthy start to life and establishing patterns which may track into adulthood, this project can inform interventions which could have a profound impact on the long term health of children. **TRIAL REGISTRATION:** This trial is registered in the Australia and New Zealand Clinical Trials Registry (ACTRN 12609000279224)

SN - 1471-2458

AD - School of Physiotherapy, Curtin University of Technology, Perth, Australia. L.Straker@curtin.edu.au

UR - 19563680

ER -

TY - JOUR

ID - 232

T1 - The impact of community-built playgrounds on the community

A1 - Daniels,D.M.

A1 - Johnson,E.L.

Y1 - 2009/07//

N1 - Daniels, Dawn Marie. Johnson, Estell Lenita

The Journal of trauma

kaf, 0376373

AIM, IM

Journal Article

English

KW - Medline

KW - Accident Prevention

KW - Child

KW - Community Networks

KW - Consumer Participation

KW - Data Collection

KW - Humans

KW - Play and Playthings

KW - Safety Management

RP - NOT IN FILE

SP - S16

EP - S19

JF - Journal of Trauma-Injury Infection & Critical Care

JA - J Trauma

VL - 67

IS - 1 Suppl

CY - United States

N2 - **BACKGROUND:** Community-built playgrounds have been an integral component of Injury Free Coalition for Kids sites as they work with communities to provide safe places for children to play. The purpose of this pilot survey was to explore the potential impact of the community-built playground on the community. **METHODS:** A survey was developed and sent electronically via an Injury Free listserv to the Injury Free sites that had built one of the 29 Injury Free playgrounds between 2002 and 2007. Variables examined included condition and maintenance of the playground, vandalism, and community participation. Open-ended questions were used to examine the impact of the playground on the community and school. Descriptive statistics were used to describe quantitative data. Open-ended responses were collated and grouped into themes. **RESULTS:** Surveys were returned from 28 Allstate playground sites. The playgrounds were built within the last 6 years with the majority (64%) built 3 or more years ago. Although 17 of the playgrounds sustained minor vandalism, 11 of the sites reported the vandalism was corrected by the community. Community impact themes centered on revitalization and empowerment, safety, and social capital changes whereas school impact themes centered on socialization and health. **CONCLUSIONS:** From the perspective of the program coordinators, the playgrounds had a positive impact on the communities. Further research within this arena is needed to explore the relationship of community-built playgrounds and community development

SN - 1529-8809

AD - Riley Hospital for Children, Indianapolis, Indiana 46202, USA. dmdaniels@clarian.org

UR - 19590347

ER -

TY - JOUR

ID - 233

T1 - From genetics to genomics: ethics, policy, and parental decision-making

A1 - Wilfond,B.

A1 - Ross,L.F.

Y1 - 2009/07//

N1 - Wilfond, Benjamin. Ross, Lainie Friedman

Journal of pediatric psychology

jl8, 7801773

IM

Journal Article

English

KW - Medline

KW - Adolescent

KW - Child

KW - Child Advocacy/es [Ethics]

KW - Decision Making/es [Ethics]

KW - Disclosure/es [Ethics]

KW - Ethics

KW - Medical

KW - Genetic Counseling/es [Ethics]

KW - Genetic Diseases

KW - Inborn/di [Diagnosis]

KW - Inborn/ge [Genetics]

KW - Genetic Testing/es [Ethics]

KW - Genomics/es [Ethics]

KW - Heterozygote Detection

KW - Humans

KW - Parental Consent/es [Ethics]

KW - Risk Assessment/es [Ethics]

RP - NOT IN FILE

SP - 639

EP - 647

JF - Journal of Pediatric Psychology

JA - J Pediatr Psychol.

VL - 34

IS - 6

CY - United States

N2 - OBJECTIVE: Ethical evaluation of genetic testing in children is traditionally based on balancing clinical benefits and risks. However, this focus can be inconsistent with the general practice of respecting parental decision-making about their children's health care. We argue that respect for parental decision-making should play a larger role in shaping pediatric genetic testing practices, and play a similar role regarding decisions to use emerging genomic technologies. METHODS: Genomic testing involves the examination of thousands of DNA markers spanning genes throughout the genome and their interrelationships, yielding virtually limitless interpretations. We presume that parents and providers should proceed cautiously in applying genomic testing in children, as we explore how genomic testing will stress the fault lines of the traditional ethical analysis.

RESULTS: Empirical data about the psychosocial risks and benefits of genetic testing of children do not reveal serious harms, yet virtually no such data exist yet about genomic testing. Unless empirical social and behavioral data indicate that genomic testing is highly likely to cause serious harms to the children, parental decisions to obtain comprehensive genomic testing in their children should be respected. Once comprehensive genomic testing of children becomes routine, resultant information may be more easily integrated by families than anticipated. CONCLUSIONS: Research on the social and behavioral impact of comprehensive genomic testing on children and their families is needed to further inform parents, clinicians, and policy makers

SN - 1465-735X

AD - Treuman Katz Center for Pediatric Bioethics, Seattle Children's Hospital, Seattle, WA 98101, USA.

benjamin.wilfond@seattlechildrens.org

UR - 18647793

ER -

TY - JOUR

ID - 234

T1 - [ADHD and attachment processes: are they related?]. [Review] [39 refs] [French]

A1 - Franc,N.

A1 - Maury,M.

A1 - Purper-Ouakil,D.

Y1 - 2009/06//

N1 - Franc, N. Maury, M. Purper-Ouakil, D

L'Encephale

efb, 7505643

IM

English Abstract. Journal Article. Review

French

KW - Medline

KW - Attention Deficit Disorder with Hyperactivity/di [Diagnosis]

KW - Attention Deficit Disorder with Hyperactivity/ge [Genetics]

KW - Attention Deficit Disorder with Hyperactivity/px [Psychology]

KW - Child

KW - Comorbidity

KW - Epigenesis

KW - Genetic/ge [Genetics]

KW - Female

KW - Genetic Predisposition to Disease/ge [Genetics]

KW - Genetic Predisposition to Disease/px [Psychology]

KW - Humans

KW - Infant

KW - Newborn

KW - Internal-External Control

KW - Pregnancy

KW - Prenatal Exposure Delayed Effects

KW - Reactive Attachment Disorder/di [Diagnosis]

KW - Reactive Attachment Disorder/px [Psychology]

KW - Risk Factors

KW - Social Environment

RP - NOT IN FILE

SP - 256

EP - 261

JF - Encephale

VL - 35

IS - 3

CY - France

N2 - Attention-deficit/hyperactivity disorder (ADHD) is defined on the basis of developmentally inappropriate inattention, motor activity and impulsivity that emerges early in development and causes impairment in social and academic functioning. ADHD is described as a multifactorial disease, with a well studied genetic vulnerability, and early environmental factors also playing an important role in the development and course of the disorder. Current aetiological models emphasize interaction between genes and environment. The concept of attachment, as proposed by John Bowlby, reflects quality of early interactions, and should therefore be considered as an early developmental factor. First, clinical findings emphasize similitude between both disorders; emotional dysregulation is an important feature in reactive attachment disorder as well as in ADHD. Emotion regulation is highly related to attachment security in young children and could play a part in the development of early attention processes. Moreover, difficult temperament is associated with higher risk for ADHD on the one hand, and can disturb the process of attachment on the other. Parental caregiving - including maternal sensitivity, positive parenting practices - is a main factor involved in the development of attachment, and has shown to be associated with better outcomes in ADHD children, especially with less oppositional/conduct disorders. Second, the aim of our review is to present clinical studies that have looked for a link between ADHD and attachment: the type of attachment could play a part in the course of the disorder: insecure and disorganised attachment types tend to be associated with a higher risk of externalised behaviors in children. For ADHD, this effect seems to be weaker than for other externalised disorders, and has been shown only in populations of at-risk children. Clinical studies also raise the question of possible links between reactive attachment disorder and ADHD. In children suffering severe early deprivation such as institution-rearing, inattention/hyperactivity symptoms were shown to be high, but these findings may not be valid in less severely deprived children. Third, another link could depend on a common vulnerability for ADHD and attachment disorder. Some perinatal factors, such as smoking during pregnancy or prematurity, have been shown to increase the risk of hyperactive symptoms in children. These variables may also be associated with a higher risk of impaired early interactions. Recent animal studies have raised interest in the role of prenatal stress in the emotional and behavioral development of the offspring, particularly as regards vulnerability to stress. Epigenetic mechanisms may be involved in durable alterations of the hypothalamo-pituitary-adrenergic axis. Preliminary findings in humans show that prenatal stress or maternal depression may also influence the development of the child. The understanding of the relationship between attachment and ADHD may help to better target prevention and intervention efforts. As the perinatal period seems to be particularly involved in both ADHD and attachment disorders, early guidance and possibly prenatal interventions should be developed and assessed for mothers and caregivers with risk-factors. [References: 39]

SN - 0013-7006

AD - MPEA Saint-Eloi, universite Montpellier-I, CHU de Montpellier, 80, avenue Augustin-Fliche, 34295 Montpellier cedex 5, France. n-franc@chu-montpellier.fr

UR - 19540412

ER -

TY - JOUR

ID - 235

T1 - How should risk be communicated to children: a cross-sectional study comparing different formats of probability information

A1 - Ulph,F.

A1 - Townsend,E.

A1 - Glazebrook,C.

Y1 - 2009///

N1 - Ulph, Fiona. Townsend, Ellen. Glazebrook, Cris

BMC medical informatics and decision making

101088682

IM

Journal Article. Research Support, Non-U.S. Gov't

English

KW - Medline

KW - Child

KW - Communication

KW - Comprehension

KW - Cross-Sectional Studies

KW - Female

KW - Genetic Predisposition to Disease/ge [Genetics]

KW - Genetic Predisposition to Disease/px [Psychology]

KW - Genetic Testing/sn [Statistics &amp; Numerical Data]

KW - Great Britain

KW - Heterozygote Detection

KW - Humans

KW - Judgment

KW - Male

KW - Models

KW - Statistical

KW - Patient Education as Topic/mt [Methods]

KW - Patient Participation

KW - Play and Playthings

KW - Probability Learning

KW - Risk

RP - NOT IN FILE

SP - 26

JF - BMC Medical Informatics &amp; Decision Making

JA - BMC Med Inf.Decis.Mak.

VL - 9

CY - England

N2 - BACKGROUND: Newborn screening, which identifies inherited disorders and sometimes carrier status, will increasingly involve health professionals in the provision of appropriate information and support to children and their families. The ability to understand carrier results relies on an understanding of probabilistic terms. However, little is known about how best to convey probabilistic medical information to children. Research with adult populations suggests information format significantly affects comprehension. This study aimed to explore which presentation format is most effective in conveying probabilistic information to children. METHODS: A probabilistic task based on the cup game was used to measure which of five different formats was associated with greatest understanding in children aged 7-11 years old (n = 106). Formats used were verbal labels (e.g. rarely, sometimes), percentages, proportion-word (e.g. 1 in X), proportion-notation (e.g. 1:X) and pie charts. There was also an additional mixed format condition. In each trial a picture was presented of three cups, each with a different probability depicted beneath it, and the child was asked to select which cup was most likely to contain the ball. Three trials were presented per format. Children also rated how certain they were that they had answered correctly. RESULTS: There was a significant relationship between format and comprehension scores. Post hoc tests showed children performed significantly better when probability was presented as a pie chart, in comparison to percentages, proportion-notation, proportion-word and mixed format trials. Furthermore, most children (84%) got all trials correct for this format and children were significantly more certain that their response was correct in the pie chart trials compared to all the other formats ( $p < 0.001$ ). Significant positive correlations were found between self-ratings of certainty and comprehension of verbal labels, percentages and pie charts. Older age was also associated with better performance on all formats except percentages. Overall comprehension was calculated by summing the scores for the individual trials and this was independently associated with older age and higher IQ. CONCLUSION: The results suggest that 7-11 year olds can understand probability information, but that the format used will significantly affect the accuracy and confidence with which children in this age group make judgements about the likelihood of an event. Of the formats studied, pie charts appear to be the optimal method of presenting probabilistic information to children in this age group.

Health professionals and designers of health messages should be cognisant of this when communicating medical information to children aged 7-11 years old

SN - 1472-6947

AD - School of Psychological Sciences, University of Manchester, Oxford Road, Manchester, UK.

fiona.ulph@manchester.ac.uk

UR - 19500337

ER -

TY - JOUR

ID - 236

T1 - Youth sports in the heat: recovery and scheduling considerations for tournament play

A1 - Bergeron, M.F.

Y1 - 2009///

N1 - Bergeron, Michael F

Sports medicine (Auckland, N.Z.)

8412297, spo

IM

Journal Article

English

KW - Medline

KW - Adolescent

KW - Body Temperature Regulation/ph [Physiology]

KW - Child

KW - Competitive Behavior

KW - Dehydration/pc [Prevention & Control]

KW - Female

KW - Heat Stress Disorders/pc [Prevention & Control]

KW - Hot Temperature

KW - Humans

KW - Leadership

KW - Male

KW - Sports

KW - Sports Medicine

RP - NOT IN FILE

SP - 513

EP - 522

JF - Sports Medicine

JA - Sports Med

VL - 39

IS - 7

CY - New Zealand

N2 - One of the biggest challenges facing numerous young athletes is attempting to perform safely and effectively in the heat. An even greater performance challenge and risk for incurring exertional heat injury is encountered when a young athlete has to compete multiple times on the same day, with only a short rest period between rounds of play, during a hot-weather tournament. Within the scope of the rules, tournament directors frequently provide athletes with only the minimum allowable time between same-day matches or games. Notably, prior same-day exercise has been shown to increase cardiovascular and thermal strain and perception of effort in subsequent activity bouts, and the extent of earlier exercise-heat exposure can affect performance and competition outcome. Incurred water and other nutrient deficits are often too great to offset during short recovery periods between competition bouts, and the athletes are sometimes 'forced' to compete again not sufficiently replenished. Providing longer rest periods between matches and games can significantly improve athlete safety and performance, by enhancing recovery and minimizing the 'carryover' effects from previous competition-related physical activity and heat exposure that can negatively affect performance and safety. Governing bodies of youth sports need to address this issue and provide more specific, appropriate and evidence-based guidelines for minimum rest periods between same-day contests for all levels of tournament play in the heat. Youth athletes are capable of tolerating the heat and performing reasonably well and safely in a

range of hot environments if they prepare well, manage hydration sufficiently, and are provided the opportunity to recover adequately between contests

SN - 0112-1642

AD - National Institute for Athletic Health and Performance and Center for Youth Sports and Health, Sanford USD Medical Center, Sioux Falls, South Dakota, USA. BergeroM@sanfordhealth.org

UR - 19530749

ER -

TY - JOUR

ID - 237

T1 - Rough-and-tumble play and the regulation of aggression: an observational study of father-child play dyads

A1 - Flanders,J.L.

A1 - Leo,V.

A1 - Paquette,D.

A1 - Pihl,R.O.

A1 - Seguin,J.R.

Y1 - 2009/07//

N1 - Flanders, Joseph L. Leo, Vanessa. Paquette, Daniel. Pihl, Robert O. Seguin, Jean R

Aggressive behavior

7502265

IM

Journal Article. Research Support, Non-U.S. Gov't

English

KW - Medline

KW - Aggression/px [Psychology]

KW - Child

KW - Preschool

KW - Dominance-Subordination

KW - Father-Child Relations

KW - Female

KW - Humans

KW - Internal-External Control

KW - Male

KW - Play and Playthings

KW - Questionnaires

KW - Risk Factors

KW - SOCIALIZATION

KW - Videotape Recording

RP - NOT IN FILE

SP - 285

EP - 295

JF - Aggressive Behavior

JA - Aggress.Behav

VL - 35

IS - 4

CY - United States

N2 - Rough-and-tumble play (RTP) is a common form of play between fathers and children. It has been suggested that RTP can contribute to the development of selfregulation. This study addressed the hypothesis that the frequency of father-child RTP is related to the frequency of physically aggressive behavior in early childhood. This relationship was expected to be moderated by the dominance relationship between father and son during play. Eighty-five children between the ages of 2 and 6 years were videotaped during a free-play session with their fathers in their homes and questionnaire data was collected about father-child RTP frequency during the past year. The play dyads were rated for the degree to which the father dominated play interactions. A significant statistical interaction revealed that RTP frequency was associated with higher levels of physical aggression in children whose fathers were less dominant. These results indicate that RTP is indeed related to

physical aggression, though this relationship is moderated by the degree to which the father is a dominant playmate. Copyright 2009 Wiley-Liss, Inc

SN - 1098-2337

AD - Department of Psychology, McGill University, Montreal, Quebec, Canada. joe.flanders@mail.mcgill.ca

UR - 19431190

ER -

TY - JOUR

ID - 238

T1 - [Scientificaly sound methodological approaches to safety evaluation of toys]. [Review] [5 refs] [Russian]

A1 - Teksheva,L.M.

A1 - Barsukova,N.K.

A1 - Markelova,S.V.

Y1 - 2009///

N1 - Teksheva, L M. Barsukova, N K. Markelova, S V

Vestnik Rossiiskoi akademii meditsinskikh nauk / Rossiiskaia akademiia meditsinskikh nauk

bl9, 9215641

IM

English Abstract. Journal Article. Review

Russian

KW - Medline

KW - Child

KW - Child Welfare

KW - Environmental Exposure/ae [Adverse Effects]

KW - Environmental Health/st [Standards]

KW - Humans

KW - Play and Playthings

KW - Russia

KW - Safety Management/og [Organization & Administration]

RP - NOT IN FILE

SP - 44

EP - 47

JF - Vestnik Rossiiskoi Akademii Meditsinskikh Nauk

JA - Vestn.Ross.Akad.Med Nauk

IS - 5

CY - Russia (Federation)

N2 - Sanitary-epidemiologic safety of toys is an important aspect of health protection and promotion for the rising generation. The authors propose scientifically substantiated methods allowing to improve quality and efficiency of safety evaluation of toys. [References: 5]

SN - 0869-6047

UR - 19514126

ER -

TY - JOUR

ID - 239

T1 - [Children with ADHD: a retrospective description of their behavioural features as toddlers]. [Spanish]

A1 - Magallon,S.

A1 - Crespo-Eguilaz,N.

A1 - Ecay,M.

A1 - Poch-Olive,M.L.

A1 - Narbona,J.

Y1 - 2009/06//

N1 - Magallon, S. Crespo-Eguilaz, N. Ecay, M. Poch-Olive, M L. Narbona, J

Anales de pediatria (Barcelona, Spain : 2003)

101162596

IM



English Abstract. Journal Article. Research Support, Non-U.S. Gov't

Spanish

KW - Medline

KW - Age Factors

KW - Attention Deficit Disorder with Hyperactivity/px [Psychology]

KW - Child

KW - Child Behavior

KW - Preschool

KW - Female

KW - Humans

KW - Male

KW - Questionnaires

KW - Retrospective Studies

RP - NOT IN FILE

SP - 562

EP - 569

JF - Anales de Pediatría

JA - An Pediatr (Barc.)

VL - 70

IS - 6

CY - Spain

N2 - OBJECTIVES: To study the relationship between behavioural profile of children suffering from Attention Deficit Hyperactivity Disorder (ADHD) and the previous behavioural style of these patients as toddlers.

SUBJECTS AND METHODS: We asked the parents of 50 schoolchildren with ADHD, and those of 30 controls, to fill in a Spanish version of the Toddler Behaviour Questionnaire (TBQ) from their retrospective perception of their children's behaviour as toddlers. TBQ items were grouped by factor analysis; t-Student between the scores of both groups and a multiple correlation analysis of TBQ and DSM-IV-ADHD-RS in each of the groups were used. RESULTS: Children in the ADHD group were reported by parents to have had a different toddler behavioural profile in comparison to that of control children ( $P < 0.05$ ). These differences were associated with adapting to new environments, mood, regularity and stability of play behaviour. A correlation was found between behavioural profile in DSM-IV-ADHD-RS and TBQ. CONCLUSIONS: The results of this study should be interpreted with caution. However, they suggest that in the fifth trimester of life a particular behavioural style as regards regularity, stability of play, and mood, could indicate a risk of developing ADHD in the future. This behavioural style should be taken into consideration in rearing and early education prospective studies

SN - 1695-4033

AD - Unidad de Neurología Pediátrica, Departamento de Pediatría, Clínica Universitaria de Navarra, Universidad de Navarra, Pamplona, Spain

UR - 19423412

ER -

TY - JOUR

ID - 240

T1 - Age at onset of anorexia nervosa and breast cancer risk

A1 - Papadopoulos,F.C.

A1 - Pantziaras,I.

A1 - Lagiou,P.

A1 - Brandt,L.

A1 - Ekselius,L.

A1 - Ekbohm,A.

Y1 - 2009/06//

N1 - Papadopoulos, Fotios C. Pantziaras, Ioannis. Lagiou, Pagona. Brandt, Lena. Ekselius, Lisa. Ekbohm, Anders

European journal of cancer prevention : the official journal of the European Cancer Prevention Organisation (ECP)

bnn, 9300837

IM

Journal Article. Research Support, Non-U.S. Gov't

English

KW - Medline

KW - Adolescent

KW - Adult

KW - Age Factors

KW - Age of Onset

KW - Anorexia Nervosa/co [Complications]

KW - Breast Neoplasms/co [Complications]

KW - Breast Neoplasms/ep [Epidemiology]

KW - Caloric Restriction

KW - Child

KW - Cohort Studies

KW - Energy Intake/ph [Physiology]

KW - Female

KW - Follow-Up Studies

KW - Humans

KW - Middle Aged

KW - Registries

KW - Retrospective Studies

KW - Risk Factors

KW - Sweden/ep [Epidemiology]

KW - Young Adult

RP - NOT IN FILE

SP - 207

EP - 211

JF - European Journal of Cancer Prevention

JA - Eur.J Cancer Prev.

VL - 18

IS - 3

CY - England

N2 - The objective of this study was to investigate breast cancer occurrence among women treated for anorexia nervosa (AN), with emphasis on age at the onset of this disorder. We conducted a register-based retrospective cohort with a total of 6009 women with at least one admission with an AN diagnosis during the period 1973-2003 in Sweden. During a mean follow-up of 13.4 years, information on 80 057 women-years was generated. The standardized incidence ratio (SIR)--the ratio of observed-to-expected number of cases--was used as the measure of relative risk. Overall, 16 women developed breast cancer versus 25.5 expected cases [SIR: 0.6, 95% confidence interval (CI): 0.4-0.9]. Among women who were first admitted for AN between the age of 10 and 24 years, four developed breast cancer versus 11.3 expected (SIR: 0.4, 95% CI: 0.1-0.9). In this group of women with early onset AN, only one parous woman developed breast cancer versus 6.3 expected (SIR: 0.2, 95% CI: 0-0.9). Among women first hospitalized for AN between the age of 25 and 40 years, 12 developed breast cancer, whereas the expected number was 14.2, a nonsignificant deficit. Our results suggest that early onset AN may play an important role in the development of breast cancer, possibly because of the extreme restriction of energy intake at a crucial period for mammary gland development. Late onset AN is likely to play a relatively less important role

SN - 1473-5709

AD - Department of Neuroscience, Psychiatry, Uppsala University Hospital, Uppsala, Sweden.

fotis.papadopoulos@gmail.com

UR - 19491607

ER -

TY - JOUR

ID - 241

T1 - The built environment: designing communities to promote physical activity in children

A1 - Committee on Environmental Health

A1 - Tester,J.M.

Y1 - 2009/06//

N1 - Committee on Environmental Health. Tester, June M

Pediatrics

oxv, 0376422

AIM, IM

Journal Article

English

KW - Medline

KW - Accidents

KW - Traffic/pc [Prevention & Control]

KW - Adolescent

KW - Child

KW - City Planning

KW - Crime/pc [Prevention & Control]

KW - Environment Design

KW - Health Promotion

KW - Humans

KW - Life Style

KW - Motor Activity

KW - Play and Playthings

KW - Recreation

KW - Residence Characteristics

KW - Safety Management

KW - United States

KW - Walking

RP - NOT IN FILE

SP - 1591

EP - 1598

JA - Pediatrics

VL - 123

IS - 6

CY - United States

N2 - An estimated 32% of American children are overweight, and physical inactivity contributes to this high prevalence of overweight. This policy statement highlights how the built environment of a community affects children's opportunities for physical activity. Neighborhoods and communities can provide opportunities for recreational physical activity with parks and open spaces, and policies must support this capacity. Children can engage in physical activity as a part of their daily lives, such as on their travel to school. Factors such as school location have played a significant role in the decreased rates of walking to school, and changes in policy may help to increase the number of children who are able to walk to school. Environment modification that addresses risks associated with automobile traffic is likely to be conducive to more walking and biking among children. Actions that reduce parental perception and fear of crime may promote outdoor physical activity. Policies that promote more active lifestyles among children and adolescents will enable them to achieve the recommended 60 minutes of daily physical activity. By working with community partners, pediatricians can participate in establishing communities designed for activity and health

SN - 1098-4275

UR - 19482771

ER -

TY - JOUR

ID - 242

T1 - Dying to play video games: carbon monoxide poisoning from electrical generators used after hurricane Ike

A1 - Fife,C.E.

A1 - Smith,L.A.

A1 - Maus,E.A.

A1 - McCarthy,J.J.

A1 - Koehler,M.Z.

A1 - Hawkins,T.

A1 - Hampson,N.B.

Y1 - 2009/06//

N1 - Fife, Caroline E. Smith, Latisha A. Maus, Erik A. McCarthy, James J. Koehler, Michelle Z. Hawkins, Trina. Hampson, Neil B

Pediatrics

oxv, 0376422

AIM, IM

Journal Article. Research Support, U.S. Gov't, P.H.S.

English

KW - Medline

KW - Academic Medical Centers/sn [Statistics & Numerical Data]

KW - Adolescent

KW - Adult

KW - Aged

KW - 80 and over

KW - Carbon Monoxide Poisoning/di [Diagnosis]

KW - Carbon Monoxide Poisoning/et [Etiology]

KW - Carbon Monoxide Poisoning/mo [Mortality]

KW - Carbon Monoxide Poisoning/pc [Prevention & Control]

KW - Cause of Death

KW - Child

KW - Preschool

KW - Cross-Sectional Studies

KW - Cyclonic Storms

KW - Disease Outbreaks

KW - Electric Power Supplies/ae [Adverse Effects]

KW - Electric Power Supplies/sn [Statistics & Numerical Data]

KW - Female

KW - Gasoline

KW - Health Education

KW - Humans

KW - Incidence

KW - Infant

KW - Male

KW - Middle Aged

KW - Risk Factors

KW - Television/sn [Statistics & Numerical Data]

KW - Texas

KW - Video Games/px [Psychology]

KW - Video Games/sn [Statistics & Numerical Data]

KW - Young Adult

RP - NOT IN FILE

SP - e1035

EP - e1038

JA - Pediatrics

VL - 123

IS - 6

CY - United States

N2 - BACKGROUND: Carbon monoxide (CO) poisoning is common after major storms because of loss of electrical power and use of alternate fuel sources for heat and electricity. In past epidemics of hurricane-related CO poisoning, the source has typically been gasoline-powered electrical generators. Although it is typically believed that generators were used to power air conditioning and refrigeration, this report demonstrates an unsuspected reason for their use. PATIENTS AND METHODS: After Hurricane Ike's landfall in September 2008, major power outages were associated with an epidemic of CO poisoning from electrical generators, as

expected. Staff at Memorial Hermann Hospital-Texas Medical Center treated or telephone-triaged cases from the Houston area. A review of the details of those cases forms the basis of this report. RESULTS: Memorial Hermann Hospital-Texas Medical Center staff treated or triaged 37 individuals exposed to CO from gasoline-powered electrical generators in 13 incidents in the first 36 hours after landfall of the hurricane. Notably, 54% (20 of 37) of the patients were under the age of 18 years. Symptoms ranged from mild to severe, with 1 child dying at the scene. Eleven patients were treated with hyperbaric oxygen. Among 9 incidents in which the reason for generator use was determined, 5 were due to generators powering video games or televisions to watch movies or programs. These 5 incidents in which video games were being powered accounted for 75% (15 of 20) of the pediatric poisonings. CONCLUSIONS: Generator-related CO poisoning is indeed common during power outages after hurricanes. However, generators are commonly being used to provide electricity to power entertainment devices for children, such as video games. Additional public education about CO risk is needed, perhaps directed at older children and teenagers through the schools in regions susceptible to hurricanes  
SN - 1098-4275

AD - Department of Medicine, Division of Cardiology, University of Texas Health Science Center, 6431 Fannin St, MSB 1.247, Houston, TX 77030, USA. caroline.e.fife@uth.tmc.edu

UR - 19482736

ER -

TY - JOUR

ID - 243

T1 - A deadly game for boys

A1 - Thomas,S.P.

Y1 - 2009/05//

N1 - Thomas, Sandra P

Issues in mental health nursing

gy7, 7907126

N

Journal Article

English

KW - Medline

KW - Adolescent

KW - Airway Obstruction/mo [Mortality]

KW - Airway Obstruction/nu [Nursing]

KW - Airway Obstruction/px [Psychology]

KW - Asphyxia/mo [Mortality]

KW - Asphyxia/nu [Nursing]

KW - Asphyxia/px [Psychology]

KW - Brain Damage

KW - Chronic/mo [Mortality]

KW - Chronic/nu [Nursing]

KW - Chronic/px [Psychology]

KW - Cause of Death

KW - Child

KW - Euphoria/ph [Physiology]

KW - Humans

KW - Male

KW - Motivation

KW - Nursing Diagnosis

KW - Play and Playthings

KW - Risk-Taking

RP - NOT IN FILE

SP - 287

JF - Issues in Mental Health Nursing

JA - Issues Ment.Health Nurs

VL - 30

IS - 5

CY - United States  
SN - 1096-4673  
UR - 19437246  
ER -

TY - JOUR

ID - 244

T1 - The effects of prosocial video games on prosocial behaviors: international evidence from correlational, longitudinal, and experimental studies

A1 - Gentile,D.A.

A1 - Anderson,C.A.

A1 - Yukawa,S.

A1 - Ihuri,N.

A1 - Saleem,M.

A1 - Ming,L.K.

A1 - Shibuya,A.

A1 - Liau,A.K.

A1 - Khoo,A.

A1 - Bushman,B.J.

A1 - Rowell,Huesmann L.

A1 - Sakamoto,A.

Y1 - 2009/06//

N1 - Gentile, Douglas A. Anderson, Craig A. Yukawa, Shintaro. Ihuri, Nobuko. Saleem, Muniba. Ming, Lim Kam. Shibuya, Akiko. Liau, Albert K. Khoo, Angeline. Bushman, Brad J. Rowell Huesmann, L. Sakamoto, Akira

Personality & social psychology bulletin

7809042

IM

Comparative Study. Journal Article. Research Support, N.I.H., Extramural. Research Support, Non-U.S. Gov't  
English

KW - Medline

KW - Adolescent

KW - Adolescent Behavior/px [Psychology]

KW - Aggression/px [Psychology]

KW - Child

KW - Child Behavior/px [Psychology]

KW - Empathy

KW - Female

KW - Helping Behavior

KW - Humans

KW - Internal-External Control

KW - Longitudinal Studies

KW - Male

KW - Models

KW - Psychological

KW - Research Design

KW - Risk Factors

KW - Sex Factors

KW - Social Behavior

KW - Students/px [Psychology]

KW - Video Games/ae [Adverse Effects]

KW - Video Games/px [Psychology]

KW - Violence/px [Psychology]

KW - Visual Perception

RP - NOT IN FILE

SP - 752

EP - 763

JF - Personality & Social Psychology Bulletin

JA - Pers.Soc Psychol.Bull.

VL - 35

IS - 6

CY - United States

N2 - Although dozens of studies have documented a relationship between violent video games and aggressive behaviors, very little attention has been paid to potential effects of prosocial games. Theoretically, games in which game characters help and support each other in nonviolent ways should increase both short-term and long-term prosocial behaviors. We report three studies conducted in three countries with three age groups to test this hypothesis. In the correlational study, Singaporean middle-school students who played more prosocial games behaved more prosocially. In the two longitudinal samples of Japanese children and adolescents, prosocial game play predicted later increases in prosocial behavior. In the experimental study, U.S. undergraduates randomly assigned to play prosocial games behaved more prosocially toward another student. These similar results across different methodologies, ages, and cultures provide robust evidence of a prosocial game content effect, and they provide support for the General Learning Model

SN - 0146-1672

AD - Iowa State University, Ames, IA 50011, USA. dgentile@iastate.edu

UR - 19321812

ER -

TY - JOUR

ID - 245

T1 - Soft landings: encouraging compliance with safety standards in Local Government Authority playgrounds

A1 - Sherker,S.

A1 - Ritchie,J.

A1 - Eager,D.

A1 - Dennis,R.

Y1 - 2009/04//

N1 - Sherker, Shauna. Ritchie, Jan. Eager, David. Dennis, Rebecca

Health promotion journal of Australia : official journal of Australian Association of Health Promotion

Professionals

9710936

IM

Journal Article. Research Support, Non-U.S. Gov't

English

KW - Medline

KW - Child

KW - Preschool

KW - Data Collection

KW - Databases as Topic

KW - Humans

KW - Local Government

KW - Maintenance

KW - New South Wales

KW - Play and Playthings/in [Injuries]

KW - Policy Making

KW - Safety/st [Standards]

KW - Wounds and Injuries/pc [Prevention & Control]

RP - NOT IN FILE

SP - 31

EP - 36

JF - Health Promotion Journal of Australia

JA - HEALTH PROMOT J AUST

VL - 20

IS - 1

CY - Australia

N2 - ISSUES ADDRESSED: Consistent with health promotion principles of good practice, addressing playground injury necessitates the creation of a supportive environment for the enhancement of wellbeing and the prevention of injuries. This study aims to survey local governments to: determine compliance with playground safety standards; establish frequency of playground inspections and maintenance; and identify motivators and barriers to compliance with safety standards. METHODS: A survey of key informants for playground safety in all 152 local government councils in New South Wales (NSW) was undertaken. RESULTS: Of 152 local councils in NSW (43 metropolitan and 109 non-metropolitan), 71.7% (n=109) completed the survey, 12.5% (n=19) refused to participate and no response was received by 15.8% (n=24). Self-reported compliance with key aspects of the standard was generally high. However, only 55% of councils complied with surface impact attenuation <200 gmax and <1,000 HIC. Further, only 14.7% of councils reported impact testing the playground surface during inspections. The main motivators to compliance included: reducing risk of litigation or liability; enhancing community and child safety, and minimising the risk of injury. The main barriers included a lack of: time; personnel, and a lack of adequate and appropriate funding. CONCLUSIONS: Local Government Authorities have a duty of care to ensure the safety of playgrounds in their jurisdiction. They require time, personnel and adequate and appropriate funding in order to achieve this aim

SN - 1036-1073

AD - NSW Injury Risk Management Research Centre, University of New South Wales, Australia.

Shauna.Sherker@unsw.edu.au

UR - 19402813

ER -

TY - JOUR

ID - 246

T1 - Parent/Caregiver supervision and child injury: a systematic review of critical dimensions for understanding this relationship. [Review] [47 refs]

A1 - Petrass,L.

A1 - Blitvich,J.D.

A1 - Finch,C.F.

Y1 - 2009/04//

N1 - Petrass, Lauren. Blitvich, Jenny D. Finch, Caroline F

Family & community health

ese, 7809641

IM

Journal Article. Research Support, Non-U.S. Gov't. Review

English

KW - Medline

KW - Accident Prevention/mt [Methods]

KW - Accident Prevention/sn [Statistics & Numerical Data]

KW - Caregivers/sn [Statistics & Numerical Data]

KW - Child

KW - Child Care/sn [Statistics & Numerical Data]

KW - Evidence-Based Medicine

KW - Helping Behavior

KW - Humans

KW - Parent-Child Relations

KW - Parenting/px [Psychology]

KW - Parents/px [Psychology]

KW - Play and Playthings/in [Injuries]

KW - Safety/sn [Statistics & Numerical Data]

KW - Wounds and Injuries/ep [Epidemiology]

KW - Wounds and Injuries/pc [Prevention & Control]

RP - NOT IN FILE

SP - 123

EP - 135

JF - Family & Community Health



JA - Fam.Community Health

VL - 32

IS - 2

CY - United States

N2 - This study reviewed the relationship between recognized dimensions of supervision and children's injuries based on Saluja et al's (Injury Control and Safety Promotion. 2004;11:17-22) hierarchal model of supervision strategies. A systematic review of peer-review studies was done with the earliest records available to 2007. There were 112 potentially relevant articles identified; 31 studies met all inclusion criteria. Reported studies were categorized according to the dimensions of supervision they addressed. Studies were not evenly distributed across the dimensions. There was evidence from the study that directly linking dimensions of supervision to child injury risk and outcomes is scarce. Future studies should consider attention, proximity, and continuity of supervision to provide a holistic understanding of the relationship between supervision and injury. [References: 47]

SN - 1550-5057

AD - School of Human Movement and Sport Sciences, University of Ballarat, Mt Helen, Ballarat, Victoria, Australia

UR - 19305211

ER -

TY - JOUR

ID - 247

T1 - Disorganized attachment and social skills as indicators of Head Start children's school readiness skills

A1 - Stacks,A.M.

A1 - Oshio,T.

Y1 - 2009/03//

N1 - Stacks, Ann M. Oshio, Toko

Attachment & human development

100901315

IM

Journal Article. Research Support, N.I.H., Extramural. Research Support, Non-U.S. Gov't

English

KW - Medline

KW - Child Development

KW - Child

KW - Preschool

KW - Early Intervention (Education)

KW - Female

KW - Humans

KW - Internal-External Control

KW - Male

KW - Object Attachment

KW - Parent-Child Relations

KW - Play and Playthings

KW - Poverty

KW - Schools

KW - Social Behavior

RP - NOT IN FILE

SP - 143

EP - 164

JF - Attachment & Human Development

JA - Attach.Hum.Dev.

VL - 11

IS - 2

CY - England

N2 - The relationships among social skills, dysregulation of symbolic representations of attachment, and school readiness were examined. Participants were 74 preschool children from low-income families in Midwest

America. Attachment representations and dysregulation of symbolic representations of attachment were assessed using a story completion task (George & Solomon, 2000) and teachers completed a survey of child behavior, which was used to assess social skills and school readiness skills. Dysregulated content in children's narratives and social skills were significant negative correlates of school readiness. There was also a marginally significant negative association between defensive dysregulation and school readiness skills for children classified as disorganized. Furthermore, a specific marker of dysregulation, controlling behavior toward the administrator, was negatively associated with school readiness, but only for children classified as disorganized. Results from this study suggest that a breakdown in the strategies of insecure/organized children may be a risk factor for low levels of school readiness and that different forms of disorganization may be associated with different types of risk. It may be useful for future studies to account for different forms of disorganization and evidence of a breakdown of strategy

SN - 1469-2988

AD - Merrill Palmer Skillman Institute Wayne State University, MI, USA. amstacks@wayne.edu

UR - 19266363

ER -

TY - JOUR

ID - 248

T1 - Ocular trauma resulting from paintball injury

A1 - Pahk,P.J.

A1 - Adelman,R.A.

Y1 - 2009/04//

N1 - Pahk, Patricia J. Adelman, Ron A

Graefe's archive for clinical and experimental ophthalmology = Albrecht von Graefes Archiv fur klinische und experimentelle Ophthalmologie

fpr, 8205248

IM

Journal Article. Research Support, Non-U.S. Gov't

English

KW - Medline

KW - Adolescent

KW - Adult

KW - Athletic Injuries/et [Etiology]

KW - Athletic Injuries/su [Surgery]

KW - Child

KW - Eye Injuries/et [Etiology]

KW - Eye Injuries/su [Surgery]

KW - Eye Protective Devices

KW - Female

KW - Follow-Up Studies

KW - Humans

KW - Hyphema/et [Etiology]

KW - Hyphema/su [Surgery]

KW - Male

KW - Paint

KW - Play and Playthings/in [Injuries]

KW - Retinal Diseases/et [Etiology]

KW - Retinal Diseases/su [Surgery]

KW - Retrospective Studies

KW - Visual Acuity

KW - Wounds

KW - Nonpenetrating/et [Etiology]

RP - NOT IN FILE

SP - 469

EP - 475

JF - Graefes Archive for Clinical & Experimental Ophthalmology

JA - Graefes Arch.Clin.Exp.Ophthalmol.

VL - 247

IS - 4

CY - Germany

N2 - **BACKGROUND:** Paintball-related ocular injuries result in severe damage and loss of vision. Despite efforts to increase public awareness and improve safety features, the incidence of eye injuries has increased over time. We examined the characteristics and ocular effects of paintball injury at our tertiary referral center.

**METHODS:** Retrospective review of charts of patients with paintball injury between 1998-2005. **RESULTS:** Fourteen patients were evaluated for paintball injury; 13 (93%) were male and one (7%) was female. Average age was 17 years (range from 9 to 30). Thirteen patients (95%) did not wear eye protection; one is unknown. Injuries occurred while playing paintball in three patients (21%); ten (71%) were injured in either accidental (four patients) or intentional (six patients) shootings not associated with play. Minimum follow-up was 6 weeks, except for one patient who was lost to follow-up. Seven patients (50%) had final visual acuity (VA) better than 20/200, six patients (43%) were 20/200 or worse, and information on one patient was not available. VA, except in one case, improved with treatment. Decreased VA in this case was due to proliferative vitreoretinopathy (PVR). Hyphema was noted in ten patients (71%), vitreous hemorrhage in eight (57%), retinal hemorrhage in six (43%), retinal tear or detachment in six (43%), commotio retinae in six (43%), iris injury in five (36%), keratopathy in four (29%), lens injury in two (14%), subluxation of lens in two (14%), secondary glaucoma in two (14%), open globe/intraocular foreign body (IOFB) in one (7%), choroidal rupture in one (7%), and proliferative vitreoretinopathy (PVR) in one (7%). Ten patients (71%) required intervention (surgery, laser retinopexy or cryotherapy). **CONCLUSION:** Paintball trauma results in significant ocular injury and loss of vision. Most injuries occur in unsupervised settings without proper eye protection. Ten patients (71%) were injured in accidental or intentional shootings. Lack of supervision and use of paintball materials as assault weapons make the risk for ocular injury more significant. Improved safety features of paintball equipment, along with continued education of proper eye protection, may reduce the incidence of severe ocular injuries

SN - 1435-702X

AD - Department of Ophthalmology, Lahey Clinic, Burlington, MA, USA

UR - 19034480

ER -

TY - JOUR

ID - 249

T1 - Relationships between weight status and child, parent and community characteristics in preschool children

A1 - Jones,R.A.

A1 - Okely,A.D.

A1 - Gregory,P.

A1 - Cliff,D.P.

Y1 - 2009///

N1 - Jones, Rachel A. Okely, Anthony D. Gregory, Parriel. Cliff, Dylan P

International journal of pediatric obesity : IJPO : an official journal of the International Association for the Study of Obesity

101256330

IM

Journal Article. Research Support, Non-U.S. Gov't

English

KW - Medline

KW - Body Weight

KW - Child Development

KW - Child

KW - Preschool

KW - Cross-Sectional Studies

KW - Exercise

KW - Family Characteristics

KW - Female

KW - Humans

KW - Male

KW - Models  
 KW - Biological  
 KW - Motor Activity  
 KW - Motor Skills  
 KW - New South Wales  
 KW - Overweight/et [Etiology]  
 KW - Overweight/pp [Physiopathology]  
 KW - Parenting  
 KW - Public Facilities  
 KW - Recreation  
 KW - Risk Assessment  
 KW - Risk Factors  
 KW - Television  
 RP - NOT IN FILE  
 SP - 54  
 EP - 60  
 JF - International Journal of Pediatric Obesity  
 JA - Int.J Pediatr Obes.  
 VL - 4  
 IS - 1  
 CY - England  
 N2 - OBJECTIVE: To examine, using an Ecological Systems Theoretical framework, relationships between weight status and child, parent and community characteristics and risk factors among preschool children. METHODS: Cross-sectional data was collected from 140 children and their parents from 11 randomly selected preschools. Outcome variables included: motor development; perceived competence; objectively measured physical activity; time spent in active and quiet play; location and number of televisions; parental rules around physical activity and time spent watching television; availability of sport and physical activity programs; and parks and open spaces and access to footpaths. RESULTS: Overweight children spent more time in quiet play and watching television and less time in active play and physical activity. Perceived competence and motor development were similar for both overweight and non-overweight children. Associations between weight status and several parent and community characteristics were not evident, except for access to footpaths. Overweight children had greater access to footpaths compared with non-overweight children ( $p=0.046$ ). CONCLUSION: The results reported here showed little difference between overweight and non-overweight children in relation to a variety of child, parent and community variables. However, for some characteristics, differences in older children have been reported. Longitudinal studies are required to confirm when these characteristics begin to differ, what effects these differences have on behaviour and weight-status, and therefore when targeted treatment should be provided during a child's development  
 SN - 1747-7174  
 AD - Child Obesity Research Centre, Faculty of Education, University of Wollongong, Wollongong NSW, Australia. rachelj@uow.edu.au  
 UR - 18608633  
 ER -  
  
 TY - JOUR  
 ID - 250  
 T1 - Once bitten, twice shy? Medically-attended injuries can sensitise parents to children's risk of injuries on playgrounds  
 A1 - Morrongiello,B.A.  
 A1 - Howard,A.W.  
 A1 - Rothman,L.  
 A1 - Sandomierski,M.  
 Y1 - 2009/02//  
 N1 - Morrongiello, B A. Howard, A W. Rothman, L. Sandomierski, M  
 Injury prevention : journal of the International Society for Child and Adolescent Injury Prevention  
 crz, 9510056  
 IM

Journal Article

English

KW - Medline

KW - Adaptation

KW - Psychological

KW - Analysis of Variance

KW - Attitude of Health Personnel

KW - Case-Control Studies

KW - Child

KW - Female

KW - Humans

KW - Male

KW - Parents/px [Psychology]

KW - Perception

KW - Play and Playthings

KW - Risk Assessment

KW - Risk Factors

KW - Wounds and Injuries/px [Psychology]

RP - NOT IN FILE

SP - 50

EP - 54

JA - Injury Prevention

VL - 15

IS - 1

CY - England

N2 - OBJECTIVE: To compare risk perceptions of parents whose child sustained a medically attended playground injury (cases) with those of parents whose child had not (controls) to address two questions. Does having a child experience a medically attended injury: (1) sensitise parents to children's injury vulnerability and severity; (2) influence parents' appraisal of the injury mechanism (child's behaviour), attributions for injuries or beliefs about strategies for prevention? METHOD: Each case-control parent dyad was assigned to one of two conditions: (1) being presented with 10 common injury-risk playground behaviours specific to the equipment on which their child had been hurt, and asked to appraise injury vulnerability and severity; or (2) being presented with scenarios about playground injuries that varied in severity but were all based on the same child behaviour, and asked questions about this behaviour, attributions for injury and strategies for prevention. RESULTS: The results support the occurrence of a sensitisation process. Compared with control parents, case parents showed higher ratings of injury severity and children's vulnerability to injury, made fewer attributions for injuries to bad luck, and endorsed a greater diversity of prevention strategies, including parent (closer supervision), child (teaching rules about safe play on playgrounds) and environmental (modifications to playgrounds).

CONCLUSIONS: A child's medically attended injury can create a "teachable moment" for the parent. Linking injury-prevention programming to this teachable moment may increase the likelihood of evoking changes in parental supervisory behaviour and their setting of rules limiting their child's risk behaviours to reduce the occurrence of childhood injury

SN - 1475-5785

AD - Psychology Department, University of Guelph, Guelph, Canada. bmorrong@uoguelph.ca

UR - 19190277

ER -

TY - JOUR

ID - 251

T1 - Exuberant and inhibited toddlers: stability of temperament and risk for problem behavior

A1 - Stifter,C.A.

A1 - Putnam,S.

A1 - Jahromi,L.

Y1 - 2008///

N1 - Stifter, Cynthia A. Putnam, Samuel. Jahromi, Laudan  
Development and psychopathology

cn7, 8910645

IM

Journal Article. Research Support, N.I.H., Extramural  
English

KW - Medline

KW - Adaptation

KW - Psychological

KW - Arousal

KW - Child Behavior Disorders/di [Diagnosis]

KW - Child Behavior Disorders/px [Psychology]

KW - Child

KW - Preschool

KW - Emotions

KW - Female

KW - Frustration

KW - Humans

KW - Inhibition (Psychology)

KW - Internal-External Control

KW - Longitudinal Studies

KW - Male

KW - Personality Assessment

KW - Personality Development

KW - Play and Playthings

KW - Risk Factors

KW - Shyness

KW - Social Behavior

KW - Social Environment

KW - Temperament

RP - NOT IN FILE

SP - 401

EP - 421

JF - Development & Psychopathology

JA - Dev.Psychopathol.

VL - 20

IS - 2

CY - United States

N2 - Temperament, effortful control, and problem behaviors at 4.5 years were assessed in 72 children classified as exuberant, inhibited, and low reactive as 2-year-olds. Exuberant toddlers were more positive, socially responsive to novel persons, less shy, and rated as having more problem behaviors, including externalizing and internalizing behaviors, than other children as preschoolers. Two forms of effortful control, the ability to delay a response and the ability to produce a subdominant response, were associated with fewer externalizing behaviors, whereas expressing more negative affect (relative to positive/neutral affect) when disappointed was related to more internalizing behaviors. Interaction effects implicated high levels of unregulated emotion during disappointment as a risk factor for problem behaviors in exuberant children

SN - 1469-2198

AD - Pennsylvania State University, University Park, PA 16803, USA. tvr@psu.edu

UR - 18423086

ER -

TY - JOUR

ID - 252

T1 - Exposure to externalizing peers in early childhood: homophily and peer contagion processes

A1 - Hanish,L.D.

A1 - Martin,C.L.

A1 - Fabes,R.A.

A1 - Leonard,S.

A1 - Herzog,M.

Y1 - 2005/06//

N1 - Hanish, Laura D. Martin, Carol Lynn. Fabes, Richard A. Leonard, Stacie. Herzog, Melissa

Journal of abnormal child psychology

0364547, h33

IM

Journal Article. Research Support, N.I.H., Extramural. Research Support, Non-U.S. Gov't. Research Support, U.S. Gov't, P.H.S.

English

KW - Medline

KW - Child

KW - Child Behavior/px [Psychology]

KW - Child Development

KW - Preschool

KW - Choice Behavior

KW - Female

KW - Humans

KW - Imitative Behavior

KW - Male

KW - Peer Group

KW - Play and Playthings

KW - Psychological Theory

KW - Sex Factors

KW - Sexual Behavior/px [Psychology]

KW - Social Behavior

RP - NOT IN FILE

SP - 267

EP - 281

JF - Journal of Abnormal Child Psychology

JA - J Abnorm.Child Psychol.

VL - 33

IS - 3

CY - United States

N2 - Guided by a transactional model, we examined the predictors and effects of exposure to externalizing peers in a low-risk sample of preschoolers and kindergarteners. On the basis of daily observations of peer interactions, we calculated measures of total exposure to externalizing peers and measures of exposure to same- and other-sex externalizing peers. Analyses of predictors of externalizing peer exposure supported a homophily hypothesis for girls. Tests of peer contagion effects varied by sex, and exposure to externalizing peers predicted multiple problem behaviors for girls but not for boys. Sex differences were a function of children's own sex, but not of peers' sex. The study provides evidence of externalizing peer exposure effects in a low-risk sample of young children, notably for girls

SN - 0091-0627

AD - Department of Family and Human Development, Arizona State University, Tempe, Arizona 85287-2502, USA. laura.hanish@asu.edu

UR - 15957556

ER -

TY - JOUR

ID - 253

T1 - Dose-response effect of mother-infant clinical home visiting on aggressive behavior problems in kindergarten

A1 - Lyons-Ruth,K.

A1 - Melnick,S.

Y1 - 2004/06//

N1 - Lyons-Ruth, Karlen. Melnick, Sharon

Journal of the American Academy of Child and Adolescent Psychiatry

hg5, 8704565

IM

Clinical Trial. Controlled Clinical Trial. Journal Article. Research Support, Non-U.S. Gov't. Research Support, U.S. Gov't, P.H.S.

English

KW - Medline

KW - Aggression

KW - Analysis of Variance

KW - Child Behavior Disorders/ep [Epidemiology]

KW - Child Behavior Disorders/pc [Prevention & Control]

KW - Child

KW - Preschool

KW - Community Mental Health Services

KW - Female

KW - Follow-Up Studies

KW - Home Care Services

KW - Humans

KW - Infant

KW - Linear Models

KW - Male

KW - Poverty

KW - Time Factors

KW - United States/ep [Epidemiology]

RP - NOT IN FILE

SP - 699

EP - 707

JF - Journal of the American Academy of Child & Adolescent Psychiatry

JA - J Am Acad.Child Adolesc Psychiatry

VL - 43

IS - 6

CY - United States

N2 - OBJECTIVE: The objective of this follow-up study was to assess the long-term effects of clinical infant home-visiting services on child outcomes at school entry. METHOD: Participants were 63 five-year-olds from low-income families, half of whom were referred to parent-infant home-visiting services during the first 18 months of life due to concerns about the caretaking environment. Families received between 0 and 18 months of weekly home visits based on infant age at entry into the study. At age 5, children were rated by teachers on the Preschool Behavior Questionnaire for behavior problems in the classroom and by parents both on the Simmons Behavior Checklist for behavior problems at home and on the Achenbach Social Competence Items for positive play behaviors with friends. RESULTS: With initial family risk status and child gender controlled, teacher-rated hostile behavior problems decreased in dose-response relation to the duration of early home-visiting services, which accounted for 15% of the variance in child hostile behavior. Parents' reports of positive play behaviors were positively linearly related to service duration. Parents' reports of behavior problems were less reliably related to service duration than teacher reports. CONCLUSIONS: Early home-visiting services reduced the incidence of aggressive behavior problems among socially at-risk children for up to 3.5 years after the end of services

SN - 0890-8567

AD - Department of Psychiatry, Harvard Medical School at the Cambridge Hospital, Cambridge, MA 02139, USA. klruth@hms.harvard.edu

UR - 15167086

ER -

TY - JOUR

ID - 254

T1 - Modern sports eye injuries

A1 - Capao Filipe,J.A.

A1 - Rocha-Sousa,A.



A1 - Falcao-Reis,F.  
A1 - Castro-Correia,J.  
Y1 - 2003/11//  
N1 - Capao Filipe, J A. Rocha-Sousa, A. Falcao-Reis, F. Castro-Correia, J  
The British journal of ophthalmology  
azk, 0421041  
IM  
Journal Article  
English  
KW - Medline  
KW - Adolescent  
KW - Adult  
KW - Athletic Injuries/et [Etiology]  
KW - Athletic Injuries/pp [Physiopathology]  
KW - Athletic Injuries/th [Therapy]  
KW - Child  
KW - Eye Injuries/et [Etiology]  
KW - Eye Injuries/pp [Physiopathology]  
KW - Eye Injuries/th [Therapy]  
KW - Eye Protective Devices  
KW - Eyelids/in [Injuries]  
KW - Eyelids/su [Surgery]  
KW - Female  
KW - Follow-Up Studies  
KW - Humans  
KW - Laser Coagulation  
KW - Male  
KW - Middle Aged  
KW - Play and Playthings/in [Injuries]  
KW - Portugal  
KW - Prospective Studies  
KW - Racquet Sports/in [Injuries]  
KW - Retinal Perforations/et [Etiology]  
KW - Retinal Perforations/su [Surgery]  
KW - Soccer/in [Injuries]  
KW - Visual Acuity  
RP - NOT IN FILE  
SP - 1336  
EP - 1339  
JF - British Journal of Ophthalmology  
JA - Br J Ophthalmol.  
VL - 87  
IS - 11  
CY - England  
N2 - AIMS: To determine the severity and long term sequelae of eye injuries caused by modern sports that could be responsible for significant ocular trauma in the future. METHODS: Prospective observational study of 24 (25 eyes) athletes with sports related ocular injuries from health clubs, war games, adventure, radical and new types of soccer, presenting to an eye emergency department between 1992 and 2002 (10 years). RESULTS: Modern sports were responsible for 8.3% of the 288 total sports eye injuries reported. Squash (29.2%) was the most common cause, followed by paintball (20.8%) and motocross (16.6%). The most common diagnosis during the follow up period was retinal breaks (20%). 18 (75%) patients sustained a severe injury. The final visual acuity remained <20/100 in two paintball players. CONCLUSIONS: Ocular injuries resulting from modern sports are often severe. Adequate instruction of the participants in the games, proper use of eye protectors, and a routine complete ophthalmological examination after an eye trauma should be mandatory  
SN - 0007-1161

AD - Department of Ophthalmology, University of Porto School of Medicine, S Joao Hospital, Porto, Portugal.

jacapaofilipe@netcabo.pt

UR - 14609827

ER -

TY - JOUR

ID - 255

T1 - Mother-infant and father-infant attachment among alcoholic families

A1 - Eiden,R.D.

A1 - Edwards,E.P.

A1 - Leonard,K.E.

Y1 - 2002///

N1 - Eiden, Rina Das. Edwards, Ellen Peterson. Leonard, Kenneth E

Development and psychopathology

cn7, 8910645

IM

Journal Article. Research Support, U.S. Gov't, P.H.S.

English

KW - Medline

KW - Adult

KW - Alcoholism/px [Psychology]

KW - Antisocial Personality Disorder/di [Diagnosis]

KW - Antisocial Personality Disorder/px [Psychology]

KW - Child

KW - Child of Impaired Parents/px [Psychology]

KW - Preschool

KW - Conflict (Psychology)

KW - Depression/px [Psychology]

KW - Father-Child Relations

KW - Female

KW - Humans

KW - Infant

KW - Longitudinal Studies

KW - Male

KW - Middle Aged

KW - Mother-Child Relations

KW - New York

KW - Object Attachment

KW - Reactive Attachment Disorder/di [Diagnosis]

KW - Reactive Attachment Disorder/px [Psychology]

KW - Risk Factors

KW - Temperament

RP - NOT IN FILE

SP - 253

EP - 278

JF - Development & Psychopathology

JA - Dev.Psychopathol.

VL - 14

IS - 2

CY - United States

N2 - This study examined the association between fathers' alcoholism and other risk factors such as parental depression, family conflict, infant temperament, and parent-infant attachment. The quality of parent-infant interactions was hypothesized to be a proximal mediator of the associations among alcoholism and other risk factors and attachment. The participants were 223 families (104 nonalcoholic families and 119 alcoholic families) with 12-month-old infants recruited through birth records. Infants in families with two parents with alcohol problem had significantly higher rates of insecure attachment with both parents. Structural Equations

Modeling indicated that the fathers' alcohol problem was associated with lower paternal sensitivity (higher negative affect, lower positive engagement, and lower sensitive responding) during father-infant play interactions, and this in turn was associated with higher risk for infant attachment insecurity with fathers. The association between the fathers' alcohol problem and infant attachment security with the mother was mediated by maternal depression, and maternal alcohol problems and family conflict were associated with maternal sensitivity during play interactions. These results indicate that the fathers' alcoholism is associated with higher family risk including the quality of the parent-infant relationship; infant attachment develops in a family context; and this context has a significant association with attachment security

SN - 0954-5794

AD - University at Buffalo, State University of New York, USA. eiden@ria.buffalo.edu

UR - 12030691

ER -

TY - JOUR

ID - 257

T1 - Resilient adolescent adjustment among girls: buffers of childhood peer rejection and attention-deficit/hyperactivity disorder

A1 - Mikami,A.Y.

A1 - Hinshaw,S.P.

Y1 - 2006/12//

N1 - Mikami, Amori Yee. Hinshaw, Stephen P

Journal of abnormal child psychology

0364547, h33

IM

Journal Article. Research Support, N.I.H., Extramural. Research Support, Non-U.S. Gov't

English

KW - Medline

KW - Adolescent

KW - Attention Deficit Disorder with Hyperactivity/di [Diagnosis]

KW - Attention Deficit Disorder with Hyperactivity/px [Psychology]

KW - Child

KW - Female

KW - Follow-Up Studies

KW - Humans

KW - Interpersonal Relations

KW - Life Change Events

KW - Peer Group

KW - Rejection (Psychology)

KW - Severity of Illness Index

KW - Social Adjustment

KW - Social Behavior

RP - NOT IN FILE

SP - 825

EP - 839

JF - Journal of Abnormal Child Psychology

JA - J Abnorm.Child Psychol.

VL - 34

IS - 6

CY - United States

N2 - Examined a risk-resilience model of peer rejection and attention-deficit/hyperactivity disorder (ADHD) in a 5-year longitudinal study of 209 ethnically and socioeconomically diverse girls aged 6-13 at baseline and 11-18 at follow-up. Risk factors were childhood ADHD diagnosis and peer rejection; hypothesized protective factors were childhood measures of self-perceived scholastic competence, engagement in goal-directed play when alone, and popularity with adults. Adolescent criterion measures were multi-informant composites of externalizing and internalizing behavior plus indicators of academic achievement, eating pathology, and substance use. ADHD and peer rejection predicted risk for all criterion measures except for substance use,

which was predicted by ADHD only. ADHD and peer rejection predicted lower adolescent academic achievement controlling for childhood achievement, but they did not predict adolescent externalizing and internalizing behavior after controlling for baseline levels of these constructs. Regarding buffers, self-perceived scholastic competence in childhood (with control of academic achievement) predicted resilient adolescent functioning. Contrary to hypothesis, goal-directed play in childhood was associated with poor adolescent outcomes. Buffers were not found to have differential effectiveness among girls with ADHD relative to comparison girls

SN - 0091-0627

AD - Department of Psychology, University of Virginia, 102 Gilmer Hall, P.O. Box 400400, Charlottesville, VA 22904-4400, USA. mikami@virginia.edu

UR - 17051436

ER -

TY - JOUR

ID - 258

T1 - Understanding high traffic injury risks for children in low socioeconomic areas: a qualitative study of parents' views

A1 - Christie,N.

A1 - Ward,H.

A1 - Kimberlee,R.

A1 - Towner,E.

A1 - Slaney,J.

Y1 - 2007/12//

N1 - Christie, N. Ward, H. Kimberlee, R. Towner, E. Slaney, J

Injury prevention : journal of the International Society for Child and Adolescent Injury Prevention  
crz, 9510056

IM

Journal Article. Multicenter Study

English

KW - Medline

KW - Accidents

KW - Traffic/px [Psychology]

KW - Traffic/sn [Statistics & Numerical Data]

KW - Adolescent

KW - Attitude to Health

KW - Child

KW - England

KW - Focus Groups

KW - Humans

KW - Motor Vehicles

KW - Parents/px [Psychology]

KW - Play and Playthings/in [Injuries]

KW - Play and Playthings/px [Psychology]

KW - Risk Factors

KW - Safety

KW - Socioeconomic Factors

KW - Wounds and Injuries/px [Psychology]

RP - NOT IN FILE

SP - 394

EP - 397

JA - Injury Prevention

VL - 13

IS - 6

CY - England

N2 - OBJECTIVE: To gain an in-depth qualitative understanding of parents' views about their children's exposure to road traffic injury risk in low socioeconomic areas. DESIGN: Focus groups facilitated by a

moderator with content analysis of data. **SETTING:** Focus groups were conducted in 10 low socioeconomic English districts that also have high rates of child pedestrian injury. Research was conducted in community venues within each area. **SUBJECTS:** Parents of children aged 9-14 years living in low socioeconomic areas. **RESULTS:** Parents believe that children play in their local streets for the following reasons: they like playing out with friends near home; there are few safe, secure, and well-maintained public spaces for children; children are excluded from affordable leisure venues because of their costs; insufficient parental responsibility. For children that play in the street, the key sources of risk identified by parents were: illegal riding and driving around estates and on the pavements; the speed and volume of traffic; illegal parking; drivers being poorly informed about where children play; children's risk-taking behavior. **CONCLUSIONS:** Intervention programs need to take into account multiple reasons why children in low socioeconomic areas become exposed to hazardous environments thereby increasing their risk of injury. Multi-agency partnerships involving the community are increasingly needed to implement traditional road safety approaches, such as education, engineering, and enforcement, and provide safe and accessible public space, affordable activities for children, and greater support for parents

SN - 1353-8047

AD - Postgraduate Medical School, University of Surrey, Guildford, Surrey, UK. n.christie@surrey.ac.uk

UR - 18056316

ER -

TY - JOUR

ID - 259

T1 - Resale of recalled children's products online: an examination of the world's largest yard sale

A1 - Brown,Kirschman K.

A1 - Smith,G.A.

Y1 - 2007/08//

N1 - Brown Kirschman, Keri. Smith, Gary A

Injury prevention : journal of the International Society for Child and Adolescent Injury Prevention  
 crz, 9510056

IM

Journal Article

English

KW - Medline

KW - Child

KW - Preschool

KW - Commerce/st [Standards]

KW - Consumer Product Safety

KW - Female

KW - Humans

KW - Infant

KW - Internet

KW - Male

KW - Play and Playthings/in [Injuries]

KW - Risk Management

RP - NOT IN FILE

SP - 228

EP - 231

JA - Injury Prevention

VL - 13

IS - 4

CY - England

N2 - **OBJECTIVE:** To examine an online auction site for the presence and sale of children's products and toys previously recalled because of safety concerns. **METHODS:** Targeted items were randomly selected from US Consumer Product Safety Commission (CPSC) press releases of recalled children's products dated 1992-2004. Auction listings from eBay were searched for the 150 targeted recalled items for 30 days. Item, seller, and buyer information were recorded from the auction listings. **RESULTS:** 190 auctions contained or were suspected to contain a recalled children's item from the target list. Most of the recalled items were listed for sale from

addresses within the United States, with sellers from Canada, Australia, Great Britain, and Ireland also represented. On average, six bids were placed on each recalled item, with 70% of auctions eventuating in a sale. CONCLUSIONS: Recalled children's products were found to be available for sale online and were sold most of the time, presenting a risk of injury to children. Although the CPSC is charged with notifying the public of recalled items, these results suggest that potentially hazardous products are recirculating online. A multi-front initiative to decrease the presence of hazards in online auctions is needed. This initiative should include increased manufacturer efforts to improve recall return rates, a requirement by online auction sites that sellers verify non-recall status before item posting, and parental checks of government recall websites before item purchase. Investigation of parental understanding and awareness of recalls and the potential risks associated with recall announcements is needed

SN - 1353-8047

AD - Department of Psychology, University of Dayton, Dayton, OH 45409, USA.

kirschKe@notes.udayton.edu

UR - 17686931

ER -

TY - JOUR

ID - 260

T1 - Superhero-related injuries in paediatrics: a case series

A1 - Davies,P.

A1 - Surridge,J.

A1 - Hole,L.

A1 - Munro-Davies,L.

Y1 - 2007/03//

N1 - Davies, Patrick. Surridge, Julia. Hole, Laura. Munro-Davies, Lisa

Archives of disease in childhood

6xg, 0372434

AIM, IM

Case Reports. Journal Article

English

KW - Medline

KW - Accidental Falls

KW - Child

KW - Clothing

KW - Fractures

KW - Bone/et [Etiology]

KW - Humans

KW - Imitative Behavior

KW - Infant

KW - Male

KW - Play and Playthings/in [Injuries]

KW - Risk-Taking

RP - NOT IN FILE

SP - 242

EP - 243

JF - Archives of Disease in Childhood

JA - Arch.Dis.Child

VL - 92

IS - 3

CY - England

N2 - Five cases of serious injuries to children wearing superhero costumes, involving extreme risk-taking behaviour, are presented here. Although children have always displayed behaviour seemingly unwise to the adult eye, the advent of superhero role models can give unrealistic expectations to the child, which may lead to serious injury. The children we saw have all had to contemplate on their way to hospital that they do not in fact possess superpowers. The inbuilt injury protection which some costumes possess is also discussed

SN - 1468-2044

AD - Department of Paediatrics, Queen's Medical Centre, Nottingham, UK  
UR - 17337680  
ER -

TY - JOUR

ID - 261

T1 - The mercury emergency and Hamilton school children: a follow-up analysis

A1 - George,L.

A1 - Scott,F.E.

A1 - Cole,D.

A1 - Siracusa,L.

A1 - Buffett,C.

A1 - Hunter,W.

A1 - Zinkewich,R.

Y1 - 1996/07//

N1 - George, L. Scott, F.E. Cole, D. Siracusa, L. Buffett, C. Hunter, W. Zinkewich, R  
Canadian journal of public health = Revue canadienne de sante publique

ck6, 0372714

IM

Journal Article

English

KW - Medline

KW - Adolescent

KW - Child

KW - Emergencies

KW - Environmental Exposure/an [Analysis]

KW - Female

KW - Humans

KW - Male

KW - Mercury/ae [Adverse Effects]

KW - Mercury

KW - Mercury Poisoning/co [Complications]

KW - Mercury Poisoning/ep [Epidemiology]

KW - Mercury Poisoning/pc [Prevention & Control]

KW - Ontario/ep [Epidemiology]

KW - Play and Playthings

KW - Risk Factors

RP - NOT IN FILE

SP - 224

EP - 226

JF - Canadian Journal of Public Health

JA - Can J Public Health

VL - Revue Canadienne de Sante Publique. 87

IS - 4

CY - CANADA

N2 - In September 1993, children broke into a laboratory in an abandoned scrap metal recycling plant in Hamilton and removed mercury and other materials from the site. They began distribution of the mercury to their peers but this activity was halted once an emergency response was established. This paper focuses on the identification and assessment of children exposed to mercury and the use of Epi Info 6 in the analysis. Approximately 6,000 children were screened and 269 children identified as being exposed or at risk of exposure. We found that distribution of mercury within the school system was swift. Children exhibited a number of risky behaviours with mercury. There were no significant gender differences in these behaviours. The majority of children involved were 10 to 13 years of age. No child exhibited health effects from exposure

SN - 0008-4263

AD - McMaster University, Faculty of Health Sciences, Hamilton, ON

UR - 8870298

ER -

TY - JOUR

ID - 262

T1 - Does play equipment conform to the Canadian standard?

A1 - Lesage,D.

A1 - Robitaille,Y.

A1 - Dorval,D.

A1 - Beaulne,G.

Y1 - 1995/07//

N1 - Lesage, D. Robitaille, Y. Dorval, D. Beaulne, G

Canadian journal of public health = Revue canadienne de sante publique  
ck6, 0372714

IM

Journal Article

English

KW - Medline

KW - Child

KW - Child Welfare

KW - Equipment Safety

KW - Humans

KW - Play and Playthings

KW - Quebec

KW - Safety/st [Standards]

RP - NOT IN FILE

SP - 279

EP - 283

JF - Canadian Journal of Public Health

JA - Can J Public Health

VL - Revue Canadienne de Sante Publique. 86

IS - 4

CY - CANADA

N2 - In the summer of 1991, play equipment in 254 playgrounds located on the island of Montreal were inspected, using a checklist made up of items drawn from the Canadian standard for the safety of children's playspaces and equipment. The results of the study, covering 605 climbers, 522 swings and 181 slides, made it possible to identify the most and least respected aspect of safety. For example, one out of two pieces of play equipment was installed on a protective surface that did not conform to the Canadian standard; seven out of ten swings had seats made of non-impact-absorbing materials; and six out of ten pieces of equipment had head entrapment openings. Knowing the physical shortcomings of play equipment is an important step in reducing injuries sustained on it. However, to be effective, the prevention of injuries related to play equipment requires a concerted effort on the part of several partners

SN - 0008-4263

AD - Direction de la sante publique de Montreal-Centre, Christophe-Colomb

UR - 7497417

ER -

TY - JOUR

ID - 263

T1 - Influencing children's pregambling game playing via conditional discrimination training

A1 - Johnson,T.E.

A1 - Dixon,M.R.

Y1 - 2009///

N1 - Johnson, Taylor E. Dixon, Mark R

Journal of applied behavior analysis

0174763, hdr

IM



Journal Article

English

KW - Medline

KW - Child

KW - Choice Behavior

KW - Discrimination Learning

KW - Female

KW - Gambling/px [Psychology]

KW - Humans

KW - Male

KW - Play and Playthings

KW - Transfer (Psychology)

RP - NOT IN FILE

SP - 73

EP - 81

JF - Journal of Applied Behavior Analysis

JA - J Appl.Behav Anal.

VL - 42

IS - 1

CY - United States

N2 - Past research has demonstrated a transformation of stimulus functions under similar conditions using gambling tasks and adults (e.g., Zlomke & Dixon, 2006), and the present study attempted to extend this research. Experimenters exposed 7 children (ages 7 to 10 years) to a simulated board game with concurrently available dice differing only by color. Following initial exposure to the game, participants were trained to discriminate between two contextual cues representing the relational frames of more than and less than. Following the training procedure, experimenters reexposed participants to the simulated board game. Six of the 7 participants demonstrated an increased preference toward the die with the color that had been paired with more than during the conditional discrimination training

SN - 1938-3703

AD - Southern Illinois University, IL, USA

UR - 19721731

ER -

TY - JOUR

ID - 264

T1 - Factors associated with obesity in Indonesian adolescents

A1 - Collins,A.E.

A1 - Pakiz,B.

A1 - Rock,C.L.

Y1 - 2008///

N1 - Collins, Allison E. Pakiz, Bilge. Rock, Cheryl L

International journal of pediatric obesity : IJPO : an official journal of the International Association for the Study of Obesity

101256330

IM

Journal Article. Research Support, Non-U.S. Gov't

English

KW - Medline

KW - Adolescent

KW - Adolescent Behavior/eh [Ethnology]

KW - Age Factors

KW - Asian Continental Ancestry Group/sn [Statistics & Numerical Data]

KW - Body Mass Index

KW - Chi-Square Distribution

KW - Child

KW - Child Behavior/eh [Ethnology]

KW - Computers  
 KW - Cross-Sectional Studies  
 KW - Eating/eh [Ethnology]  
 KW - Fast Foods  
 KW - Feeding Behavior  
 KW - Female  
 KW - Food Habits/eh [Ethnology]  
 KW - Health Surveys  
 KW - Humans  
 KW - Indonesia/ep [Epidemiology]  
 KW - Life Style/eh [Ethnology]  
 KW - Logistic Models  
 KW - Male  
 KW - Motor Activity  
 KW - Obesity/di [Diagnosis]  
 KW - Obesity/eh [Ethnology]  
 KW - Obesity/px [Psychology]  
 KW - Questionnaires  
 KW - Risk Assessment  
 KW - Risk Factors  
 KW - Sedentary Lifestyle/eh [Ethnology]  
 KW - Socioeconomic Factors  
 KW - Video Games  
 RP - NOT IN FILE  
 SP - 58  
 EP - 64  
 JF - International Journal of Pediatric Obesity  
 JA - Int.J Pediatr Obes.  
 VL - 3  
 IS - 1  
 CY - England  
 N2 - OBJECTIVE. To investigate adolescent eating, activity, and behavioral patterns, and attitudes and their associations with obesity in selected communities in Indonesia. DESIGN. A cross-sectional questionnaire and physical measurement-based study in three communities of varying modernization levels in Indonesia (Yogyakarta, Kuta, and Jakarta). Subjects. 1758 middle school students (aged 12-15 years) recruited at six different schools: one public and one private school in each of the three target communities. MEASUREMENTS. The questionnaire collected data on demographic characteristics (age, gender, ethnicity, estimated household income); fast food eating habits (frequency, types of food/restaurant, general beliefs about fast foods); television, computer, and Play Station usage; physical activity (hrs/wk of participation in physical activity, transportation means for attending school); and eating habits (frequency of consuming selected foods and beverages). Student's height and weights were obtained, body mass index (BMI: weight [kg]/height [m(2)]) was calculated, and obesity was defined as  $\geq 95\%$ , using the BMI-for-age cut-offs from the Centers for Disease Control and Prevention (CDC) charts. RESULTS. Chi-square analysis revealed associations between obesity and community setting, family income, use of a computer or Play Station, type of transportation to school, and beliefs about fast foods ( $P < 0.01$ ). According to the logistic regression analysis, adolescents from families with incomes over Rp 2 mil were three times as likely to be obese (95% CI 1.9, 4.9) and boys were 2.6 times more likely to be obese (95% CI 1.5, 4.5). CONCLUSION. Greater likelihood of obesity among Indonesian adolescents who spend greater amounts of time using a computer or Play Station suggests that such sedentary activities may be replacing physical activity, promoting an energy imbalance, and subsequently, an increased risk for obesity  
 SN - 1747-7174  
 AD - Department of Family and Preventive Medicine, University of California, San Diego, La Jolla, USA  
 UR - 17852550  
 ER -  
 TY - JOUR

ID - 265

T1 - A place to play: socioeconomic and spatial factors in children's physical activity

A1 - Ziviani,J.

A1 - Wadley,D.

A1 - Ward,H.

A1 - Macdonald,D.

A1 - Jenkins,D.

A1 - Rodger,S.

Y1 - 2008/03//

N1 - Ziviani, Jenny. Wadley, David. Ward, Heather. Macdonald, Doune. Jenkins, David. Rodger, Sylvia  
Australian occupational therapy journal

15420200r

IM

Comparative Study. Journal Article. Research Support, Non-U.S. Gov't

English

KW - Medline

KW - Attitude to Health

KW - Australia/ep [Epidemiology]

KW - Child

KW - Child Welfare/sn [Statistics & Numerical Data]

KW - Exercise

KW - Female

KW - Health Behavior

KW - Health Promotion/og [Organization & Administration]

KW - Humans

KW - Income/sn [Statistics & Numerical Data]

KW - Male

KW - Obesity/ep [Epidemiology]

KW - Obesity/pc [Prevention & Control]

KW - Parent-Child Relations

KW - Play and Playthings

KW - Risk Factors

KW - Socioeconomic Factors

RP - NOT IN FILE

SP - 2

EP - 11

JF - Australian Occupational Therapy Journal

JA - Aust Occup Ther J

VL - 55

IS - 1

CY - Australia

N2 - BACKGROUND AND AIMS: Concerns about physical inactivity in children and growing levels of obesity are expressed by politicians, health economists and those involved with the health and well-being of children. As this has the potential to be a major health issue, the aim of this investigation was to explore any contributing socioenvironmental considerations. METHODS AND RESULTS: Census-matched survey data were analysed from 318 parents of 6- to 7-year-old children, revealing that family socioeconomic status (SES) influenced the places where children engaged in physical activity. Children from low SES backgrounds spent significantly more time playing close to their homes, and their families were less able to afford access to commercial physical-activity facilities, than those from middle and high SES families. Although neighbourhood-based activities are generally associated with more spontaneous free play, such activities may not provide the same opportunities for supervision and physical skill building available through commercial-based activities. CONCLUSIONS: Given that access to 'enriching' physical-activity spaces may be limited by the capacity to pay, these findings have implications for professionals such as occupational therapists who can take on a role in advocating for equity in access and promotion of a more engaging urban design. Dialogue with urban planners is central to this process

SN - 1440-1630

AD - School of Rehabilitation Sciences, The University of Queensland, St Lucia, Queensland, Australia  
UR - 20887428  
ER -

TY - JOUR

ID - 266

T1 - Atypical sources of childhood lead poisoning in the United States: a systematic review from 1966-2006.  
[Review] [49 refs]

A1 - Gorospe,E.C.

A1 - Gerstenberger,S.L.

Y1 - 2008/09//

N1 - Gorospe, Emmanuel C. Gerstenberger, Shawn L

Clinical toxicology (Philadelphia, Pa.)

101241654

AIM, IM

Journal Article. Review

English

KW - Medline

KW - Candy/ae [Adverse Effects]

KW - Child

KW - Condiments/ae [Adverse Effects]

KW - Cosmetics/ae [Adverse Effects]

KW - Environmental Exposure

KW - Environmental Pollutants/ae [Adverse Effects]

KW - Female

KW - Health Knowledge

KW - Attitudes

KW - Practice

KW - Household Articles

KW - Humans

KW - Infant

KW - Lead Poisoning/di [Diagnosis]

KW - Lead Poisoning/ep [Epidemiology]

KW - Lead Poisoning/et [Etiology]

KW - Male

KW - Medicine

KW - Traditional

KW - Play and Playthings

KW - Practice Guidelines as Topic

KW - Predictive Value of Tests

KW - Questionnaires

KW - Risk Factors

KW - United States/ep [Epidemiology]

RP - NOT IN FILE

SP - 728

EP - 737

JF - Clinical Toxicology: The Official Journal of the American Academy of Clinical Toxicology & European Association of Poisons Centres & Clinical Toxicologists

JA - Clin.Toxicol.(Phila)

VL - 46

IS - 8

CY - United States

N2 - BACKGROUND: Lead poisoning from atypical sources, which excludes the well-established lead-based paint ingestions and exposure in occupational settings, are increasingly reported in medical literature. Our objective is to increase awareness on atypical sources of lead exposure and to formulate recommendations for their detection based on actual reported cases. METHODS: We systematically retrieved and reviewed reports on

pediatric lead poisoning in the U.S. from atypical sources by searching Medline, Embase, CINAHL, Academic Search Premier, AltHealth, websites of state lead poisoning prevention programs, and the U.S. Consumer Product Safety Commission database for reports published from January 1966 to December 2006. RESULTS: We retrieved 28 published reports that met our inclusion criteria. Of these reports, 20 are case reports and 8 case series, documenting a total of 82 incidents of lead poisoning in children from atypical sources. CONCLUSION: There are varied sources of atypical lead exposure among U.S. children. The sources were grouped in the following categories based on their utility: fashion accessories, folk remedies, imported condiments & candies, pellets & bullets, and lastly, recreational & domestic items. Based on these findings, we have formulated a questionnaire that may assist in the identification of atypical lead sources in the home. [References: 49]

SN - 1556-3650

AD - University of Nevada Las Vegas, School of Public Health, Department of Environmental & Occupational Health, Las Vegas, Nevada 89154-3064, USA

UR - 18608287

ER -

TY - JOUR

ID - 267

T1 - Assessment of the current status of playground safety in the midwestern region of Turkey: an effort to provide a safe environment for children

A1 - Uskun,E.

A1 - Kisioglu,A.N.

A1 - Altay,T.

A1 - Cikinlar,R.

A1 - Kocakaya,A.

Y1 - 2008/11//

N1 - Uskun, Ersin. Kisioglu, Ahmet Nesimi. Altay, Tulin. Cikinlar, Rengul. Kocakaya, Asuman

The Turkish journal of pediatrics

wkv, 0417505

IM

Journal Article

English

KW - Medline

KW - Accident Prevention

KW - Child

KW - Preschool

KW - Equipment Design

KW - Equipment Safety

KW - Guideline Adherence

KW - Humans

KW - Play and Playthings

KW - Safety

KW - Turkey

KW - Wounds and Injuries/pc [Prevention & Control]

RP - NOT IN FILE

SP - 559

EP - 565

JF - Turkish Journal of Pediatrics

JA - Turk.J Pediatr

VL - 50

IS - 6

CY - Turkey

N2 - This study aimed to identify and evaluate the degree of conformity to the playground standards and the level of compliance with current safety specifications of the playgrounds in the midwestern region of Turkey. An observational technique was used at a total of 57 public playgrounds. A playground safety control form was prepared based on the United States National Program for Playground Safety and the Consumer Product Safety Commission security standards, since there is no national law covering playground equipment and safety in

Turkey. The study evaluated the surroundings of the playground, arrangement of equipment in the playground, and characteristics of the equipment. The percentage of playgrounds surveyed with inadequate or hard surfacing was 80.7%. Fifty-two percent of the equipment was found to be inappropriate. Equipment was higher than the recommended heights. The results of our study unfortunately point out that playgrounds for children do not meet many of the safety criteria

SN - 0041-4301

AD - Department of Public Health, Faculty of Medicine, Suleyman Demirel University, Isparta, Turkey

UR - 19227420

ER -

TY - JOUR

ID - 268

T1 - River tree rope swing injuries

A1 - Sorey,W.H.

A1 - Cassidy,L.D.

A1 - Crout,J.

A1 - Blount,P.

Y1 - 2008/07//

N1 - Sorey, William H. Cassidy, Laura D. Crout, Jeffery. Blount, Phillip

Southern medical journal

uvh, 0404522

AIM, IM

Journal Article

English

KW - Medline

KW - Adolescent

KW - Adult

KW - Athletic Injuries/ep [Epidemiology]

KW - Athletic Injuries/et [Etiology]

KW - Child

KW - Preschool

KW - Drowning/ep [Epidemiology]

KW - Drowning/et [Etiology]

KW - Female

KW - Humans

KW - Male

KW - Play and Playthings/in [Injuries]

KW - Prospective Studies

KW - Registries

KW - Retrospective Studies

KW - Swimming/in [Injuries]

KW - United States/ep [Epidemiology]

KW - Young Adult

RP - NOT IN FILE

SP - 699

EP - 702

JF - Southern Medical Journal

JA - South Med J

VL - 101

IS - 7

CY - United States

N2 - OBJECTIVE: To review injuries associated with falls from river tree rope swings (RTRS) and identify points of action for prevention. METHODS: This study was a retrospective analysis of injury reports directly related to falls from RTRS. Case reports for 2002-06 were extracted from the National Electronic Injury Surveillance System (NEISS), US legal literature, and news reports. Direct observation of river tree rope swings was performed with kayak and camera to identify potential hazards. A laboratory study was performed on

samples of rope used in RTRS to assess entanglement risk. RESULTS: NEISS detailed 73 injuries directly related to falls from RTRS in ages 5-25 years. Finger fractures were the most commonly reported injury. Based on NEISS data, an estimated 700 injuries may occur related to RTRS each year. RTRS share risk of severe injuries with traditional rope swings such as lower extremity fractures, concussions, and spinal cord injuries. Drowning, finger avulsion and genital lacerations appear more common with river tree rope swings. CONCLUSIONS: RTRS are dangerous and are associated with a variety of serious injuries from falls and entanglement. The most hazardous risk factors of RTRS are use by a non-swimmer, shallow water, extreme fall distance, and presence of a small diameter retrieval line. RTRS injuries occurring in remote locations are challenges to rural physicians and EMS providers. Prevention of recreational injuries, including injuries sustained from RTRS, remains a daunting task

SN - 1541-8243

AD - Department of Pediatrics, University of Mississippi School of Medicine, Jackson, MS 39216, USA.  
wsorey@ped.umsmed.edu

UR - 18580723

ER -

TY - JOUR

ID - 269

T1 - Active play and screen time in US children aged 4 to 11 years in relation to sociodemographic and weight status characteristics: a nationally representative cross-sectional analysis

A1 - Anderson,S.E.

A1 - Economos,C.D.

A1 - Must,A.

Y1 - 2008///

N1 - Anderson, Sarah E. Economos, Christina D. Must, Aviva

BMC public health

100968562

IM

Journal Article

English

KW - Medline

KW - Body Weight/eh [Ethnology]

KW - Body Weight/ph [Physiology]

KW - Child

KW - Preschool

KW - Continental Population Groups

KW - Cross-Sectional Studies

KW - Ethnic Groups

KW - Female

KW - Humans

KW - Male

KW - Motor Activity

KW - Obesity/ep [Epidemiology]

KW - Obesity/eh [Ethnology]

KW - Play and Playthings

KW - Risk Factors

KW - Social Class

KW - United States/ep [Epidemiology]

RP - NOT IN FILE

SP - 366

JA - BMC Public Health

VL - 8

CY - England

N2 - BACKGROUND: The high prevalence of childhood obesity underscores the importance of monitoring population trends in children's activity and screen time, and describing associations with child age, gender, race/ethnicity, and weight status. Our objective was to estimate the proportion of young children in the US who

have low levels of active play or high levels of screen time, or who have both these behaviors, and to describe associations with age, gender, race/ethnicity, and weight status. **METHODS:** We analyzed data collected during the National Health and Nutrition Examination Surveys 2001-2004, a US nationally representative cross-sectional study. We studied 2964 children aged 4.00 to 11.99 years. Our main outcomes were reported weekly times that the child played or exercised hard enough to sweat or breathe hard (active play), daily hours the child watched television/videos, used computers, or played computer games (screen time), and the combination of low active play and high screen time. Low active play was defined as active play 6 times or less per week. High screen time was defined as more than 2 hours per day. We accounted for the complex survey design in analyses and report proportions and 95% confidence intervals. We used Wald Chi-square to test for differences between proportions. To identify factors associated with low active play and high screen time, we used multivariate logistic regression. **RESULTS:** Of US children aged 4 to 11 years, 37.3% (95% confidence interval, 34.1% to 40.4%) had low levels of active play, 65.0% (95% CI, 61.4% to 68.5%) had high screen time, and 26.3% (95% CI, 23.8% to 28.9%) had both these behaviors. Characteristics associated with a higher probability of simultaneously having low active play and high screen time were older age, female gender, non-Hispanic black race/ethnicity, and having a BMI-for-age  $\geq$  95th percentile of the CDC growth reference. **CONCLUSION:** Many young children in the US are reported to have physical activity and screen time behaviors that are inconsistent with recommendations for healthy pediatric development. Children who are overweight, approaching adolescence, girls, and non-Hispanic blacks may benefit most from public health policies and programs aimed at these behaviors

SN - 1471-2458

AD - Division of Epidemiology, The Ohio State University College of Public Health, Columbus, Ohio, USA.  
sanderson@cph.osu.edu

UR - 18945351

ER -

TY - JOUR

ID - 270

T1 - Neighborhood characteristics in relation to diet, physical activity and overweight of Canadian children

A1 - Veugelers,P.

A1 - Sithole,F.

A1 - Zhang,S.

A1 - Muhajarine,N.

Y1 - 2008///

N1 - Veugelers, Paul. Sithole, Fortune. Zhang, Sharon. Muhajarine, Nazeem

International journal of pediatric obesity : IJPO : an official journal of the International Association for the Study of Obesity

101256330

IM

Journal Article. Research Support, Non-U.S. Gov't

English

KW - Medline

KW - Child

KW - Crime

KW - Cross-Sectional Studies

KW - Diet

KW - Exercise

KW - Health Behavior

KW - Health Surveys

KW - Humans

KW - Life Style

KW - Nova Scotia

KW - Odds Ratio

KW - Overweight/et [Etiology]

KW - Overweight/pp [Physiopathology]

KW - Overweight/pc [Prevention & Control]

KW - Play and Playthings



KW - Public Facilities

KW - Questionnaires

KW - Residence Characteristics

KW - Risk Assessment

KW - Risk Factors

KW - Socioeconomic Factors

KW - Sports

KW - Time Factors

RP - NOT IN FILE

SP - 152

EP - 159

JF - International Journal of Pediatric Obesity

JA - Int.J Pediatr Obes.

VL - 3

IS - 3

CY - England

N2 - BACKGROUND: Neighborhood infrastructure may provide an important opportunity to prevent overweight among children. In the present study we investigated whether access to shops for modestly priced fresh produce, access to parks and playgrounds, access to recreational facilities and neighborhood safety are related to children's diet, physical and sedentary activities, and body weights. METHODS: Data were obtained from the Children's Lifestyle and School-performance Study, a survey including 5,471 grade five students and their parents in the province of Nova Scotia, Canada. Students completed the Harvard Food Frequency Questionnaire and had their height and weight measured. Parents completed questions on socio-economic background and how they perceived their neighborhood. We applied multilevel regression methods to relate these neighborhood characteristics with children's fruit and vegetable consumption, dietary fat intake, diet quality, frequency of engaging in sports with and without a coach, screen time, overweight and obesity. RESULTS: Children in neighborhoods with greater perceived access to shops had healthier diets and were less likely to be overweight or obese. Children in neighborhoods with good access to playgrounds, parks and recreational facilities were reportedly more active and were less likely to be overweight or obese, whereas children in safe neighborhoods engaged more in unsupervised sports. CONCLUSIONS: The study demonstrated associations between neighborhood characteristics, health behaviors and childhood overweight. This contributes to the knowledge base that is still too narrow to justify informed preventative public health policy. We advocate the evaluation of natural experiments created by new policy that affect neighborhood infrastructures as the optimal opportunity to enlarge this knowledge base

SN - 1747-7166

AD - School of Public Health, University of Alberta, Alberta, Canada. paul.veugelers@ualberta.ca

UR - 19086297

ER -

TY - JOUR

ID - 271

T1 - Patient's page. Toy safety: thinking inside the box

A1 - Bright,M.

Y1 - 2008/12//

N1 - Bright, Melissa

Southern medical journal

uvh, 0404522

AIM, IM

Journal Article

English

KW - Medline

KW - Age Factors

KW - Child

KW - Preschool

KW - Consumer Product Safety/lj [Legislation & Jurisprudence]

KW - Consumer Product Safety/st [Standards]

KW - Humans  
KW - Infant  
KW - Lead Poisoning/di [Diagnosis]  
KW - Lead Poisoning/pc [Prevention & Control]  
KW - Play and Playthings/in [Injuries]  
KW - Risk Assessment/lj [Legislation & Jurisprudence]  
RP - NOT IN FILE  
SP - 1191  
EP - 1192  
JF - Southern Medical Journal  
JA - South Med J  
VL - 101  
IS - 12  
CY - United States  
SN - 1541-8243  
UR - 19005428  
ER -  
  
TY - JOUR  
ID - 272  
T1 - Sensory modulation disorder: a risk factor for participation in daily life activities  
A1 - Bar-Shalita,T.  
A1 - Vatine,J.J.  
A1 - Parush,S.  
Y1 - 2008/12//  
N1 - Bar-Shalita, Tami. Vatine, Jean-Jacques. Parush, Shula  
Developmental medicine and child neurology  
0006761, e83  
IM  
Journal Article. Research Support, Non-U.S. Gov't  
English  
KW - Medline  
KW - Achievement  
KW - Activities of Daily Living/px [Psychology]  
KW - Arousal  
KW - Avoidance Learning  
KW - Child  
KW - Child Behavior Disorders/di [Diagnosis]  
KW - Child Behavior Disorders/px [Psychology]  
KW - Defense Mechanisms  
KW - Female  
KW - Habits  
KW - Humans  
KW - Israel  
KW - Male  
KW - Motivation  
KW - Neurologic Examination/sn [Statistics & Numerical Data]  
KW - Personality Assessment/sn [Statistics & Numerical Data]  
KW - Play and Playthings  
KW - Psychometrics  
KW - Sensation Disorders/di [Diagnosis]  
KW - Sensation Disorders/px [Psychology]  
KW - Sensory Gating  
KW - Social Adjustment  
KW - Social Environment  
RP - NOT IN FILE

SP - 932

EP - 937

JF - Developmental Medicine &amp; Child Neurology

JA - Dev.Med Child Neurol.

VL - 50

IS - 12

CY - England

N2 - Participation in childhood daily functional performance was examined in 78 children: 44 with sensory modulation disorder (SMD); (33 males, 11 females; mean age 7y 6mo [SD 1.20]) and 34 without SMD (18 males, 16 females; mean age 7y 8mo [SD 1.33]). Group classification was determined using two measures: the Short Sensory Profile (SSP) and the Full-form Sensory Profile. Parents completed a battery of caregiver questionnaires. Children with SMD scored significantly lower on all three participation scales than the control group. A high correlation was observed between level of activity performance of the Participation in Childhood Occupations Questionnaire (PICO-Q) and the SSP, and a moderate correlation was observed between the Enjoyment of Performance of the PICO-Q and the SSP. A low correlation was observed between Frequency of Performance of the PICO-Q and the SSP. Logistic regression indicated that all three participation scales (level of activity performance, level of enjoyment of the activity, and frequency of performance of the activity) are significantly associated with group classification, with odds ratios of 3.13, 2.05, and 1.73 respectively. These findings are the first, to our knowledge, to confirm claims of limited participation in daily activities among children with SMD. Our results have significant clinical implications and provide support for the need for practitioners and caregivers of children with SMD to facilitate participation

SN - 1469-8749

AD - School of Occupational Therapy, Faculty of Medicine of Hadassah and the Hebrew University of Jerusalem, Israel

UR - 19046186

ER -

TY - JOUR

ID - 273

T1 - Food, fun, and fitness internet program for girls: pilot evaluation of an e-Health youth obesity prevention program examining predictors of obesity

A1 - Thompson,D.

A1 - Baranowski,T.

A1 - Cullen,K.

A1 - Watson,K.

A1 - Liu,Y.

A1 - Canada,A.

A1 - Bhatt,R.

A1 - Zakeri,I.

Y1 - 2008/11//

N1 - Thompson, Debbe. Baranowski, Tom. Cullen, Karen. Watson, Kathy. Liu, Yan. Canada, Ashanti. Bhatt, Riddhi. Zakeri, Issa

Preventive medicine

pm4, 0322116

IM

Evaluation Studies. Journal Article. Research Support, N.I.H., Extramural. Research Support, Non-U.S. Gov't. Research Support, U.S. Gov't, Non-P.H.S.

English

KW - Medline

KW - African Americans

KW - Child

KW - Diet

KW - Exercise

KW - Female

KW - Fruit

KW - Humans

KW - Internet

KW - Obesity/et [Etiology]

KW - Obesity/pc [Prevention & Control]

KW - Pilot Projects

KW - Play and Playthings

KW - Self Efficacy

KW - Texas

KW - Vegetables

RP - NOT IN FILE

SP - 494

EP - 497

JA - Preventive Medicine

VL - 47

IS - 5

CY - United States

N2 - OBJECTIVE: This pilot study tested whether an Internet-based intervention could achieve change in fruit, juice, and vegetable consumption, physical activity, and self-efficacy in youth at-risk of obesity. METHOD: Participants were 80 8-to-10-year-old African American girls at-risk of obesity, with a home computer, Internet access, and an e-mail address. A two-group design was followed. Groups differed only on incentive schedule (immediate, delayed). The 8-week home-based program, conducted entirely over the Internet, promoted fruit, juice, vegetables, and water intake and physical activity. Pre-post measures were collected through self-report via the program website. The study was conducted in the greater Houston, TX, area September through November, 2004. RESULTS: Statistically significant pre-to-post differences were observed in fruit, juice, and vegetable consumption ( $p=.002$ ), physical activity--yesterday ( $p<.001$ ), physical activity--usually ( $p=.001$ ), and fruit, juice, and vegetable self-efficacy ( $p=.003$ ). CONCLUSION: Internet-based obesity prevention programs may be an effective channel for promoting healthy diet and physical activity behaviors to youth at-risk of obesity. Additional research is needed to more fully examine their effectiveness at promoting and maintaining diet and physical activity change

SN - 1096-0260

AD - USDA/ARS Children's Nutrition Research Center, Baylor College of Medicine, Department of Pediatrics, Houston, TX, USA. dit@bcm.tmc.edu

UR - 18718846

ER -

TY - JOUR

ID - 274

T1 - Longitudinal effects of violent video games on aggression in Japan and the United States

A1 - Anderson,C.A.

A1 - Sakamoto,A.

A1 - Gentile,D.A.

A1 - Ihuri,N.

A1 - Shibuya,A.

A1 - Yukawa,S.

A1 - Naito,M.

A1 - Kobayashi,K.

Y1 - 2008/11//

N1 - Anderson, Craig A. Sakamoto, Akira. Gentile, Douglas A. Ihuri, Nobuko. Shibuya, Akiko. Yukawa, Shintaro. Naito, Mayumi. Kobayashi, Kumiko

Pediatrics

oxv, 0376422

AIM, IM

Journal Article. Research Support, N.I.H., Extramural. Research Support, Non-U.S. Gov't. Research Support, U.S. Gov't, P.H.S.

English

KW - Medline

KW - Adolescent

KW - Aggression

KW - Child

KW - Culture

KW - Female

KW - Humans

KW - Japan

KW - Male

KW - United States

KW - Video Games/ae [Adverse Effects]

KW - Video Games/px [Psychology]

KW - Violence

RP - NOT IN FILE

SP - e1067

EP - e1072

JA - Pediatrics

VL - 122

IS - 5

CY - United States

N2 - CONTEXT: Youth worldwide play violent video games many hours per week. Previous research suggests that such exposure can increase physical aggression. OBJECTIVE: We tested whether high exposure to violent video games increases physical aggression over time in both high- (United States) and low- (Japan) violence cultures. We hypothesized that the amount of exposure to violent video games early in a school year would predict changes in physical aggressiveness assessed later in the school year, even after statistically controlling for gender and previous physical aggressiveness. DESIGN: In 3 independent samples, participants' video game habits and physically aggressive behavior tendencies were assessed at 2 points in time, separated by 3 to 6 months. PARTICIPANTS: One sample consisted of 181 Japanese junior high students ranging in age from 12 to 15 years. A second Japanese sample consisted of 1050 students ranging in age from 13 to 18 years. The third sample consisted of 364 United States 3rd-, 4th-, and 5th-graders ranging in age from 9 to 12 years. RESULTS. Habitual violent video game play early in the school year predicted later aggression, even after controlling for gender and previous aggressiveness in each sample. Those who played a lot of violent video games became relatively more physically aggressive. Multisample structure equation modeling revealed that this longitudinal effect was of a similar magnitude in the United States and Japan for similar-aged youth and was smaller (but still significant) in the sample that included older youth. CONCLUSIONS: These longitudinal results confirm earlier experimental and cross-sectional studies that had suggested that playing violent video games is a significant risk factor for later physically aggressive behavior and that this violent video game effect on youth generalizes across very different cultures. As a whole, the research strongly suggests reducing the exposure of youth to this risk factor

SN - 1098-4275

AD - Department of Psychology, Center for the Study of Violence, Iowa State University, Ames, Iowa 50011, USA. caa@iastate.edu

UR - 18977956

ER -

TY - JOUR

ID - 275

T1 - "Practice what you preach": induced hypocrisy as an intervention strategy to reduce children's intentions to risk take on playgrounds

A1 - Morrongiello, B.A.

A1 - Mark, L.

Y1 - 2008/11//

N1 - Morrongiello, Barbara A. Mark, Landa

Journal of pediatric psychology

j18, 7801773

IM

Journal Article. Multicenter Study. Randomized Controlled Trial. Research Support, Non-U.S. Gov't  
English

KW - Medline  
KW - Accidental Falls/pc [Prevention & Control]  
KW - Adolescent  
KW - Age Factors  
KW - Behavior Therapy/mt [Methods]  
KW - Character  
KW - Child  
KW - Cognitive Dissonance  
KW - Exploratory Behavior  
KW - Fear  
KW - Female  
KW - Generalization (Psychology)  
KW - Health Education  
KW - Health Knowledge  
KW - Attitudes  
KW - Practice  
KW - Humans  
KW - Intention  
KW - Judgment  
KW - Male  
KW - Motivation  
KW - Ontario  
KW - Play and Playthings  
KW - Risk-Taking  
KW - Safety  
KW - Self Concept  
KW - Wounds and Injuries/pc [Prevention & Control]  
KW - Wounds and Injuries/px [Psychology]  
RP - NOT IN FILE  
SP - 1117  
EP - 1128  
JF - Journal of Pediatric Psychology  
JA - J Pediatr Psychol.  
VL - 33  
IS - 10  
CY - United States  
N2 - OBJECTIVE: An intervention based on induced hypocrisy was conducted to reduce children's intentions to show fall-risk behaviors on playground equipment. METHODS: To induce hypocrisy participants (7-12 years) advocated for safe-play behaviors while being made mindful about past failures to play safely on playgrounds. To measure the impact of the intervention, children created posters indicating which playground behaviors they Would Do and Would Not Do; children believed they would have to demonstrate the behaviors endorsed on their posters. RESULTS: The intervention resulted in significant reductions in the risk behaviors children endorsed both for risk behaviors targeted (specific effects) and nontargeted risk behaviors (generalized effects). Assessing the mechanism by which the intervention produced changes in behavioral intentions revealed it yielded changes in cognitions that predicted subsequent reductions in risk-taking intentions. CONCLUSIONS: The present intervention was successful in reducing children's intentions to engage in risky playground behaviors and it did so by changing cognitions  
SN - 1465-735X  
AD - Department of Psychology, University of Guelph, MacKinnon Building, 5th Floor, Guelph, ONT, N1G 2W1, Canada. bmorrong@uoguelph.ca  
UR - 18296456  
ER -  
  
TY - JOUR  
ID - 276

T1 - I am almost like a fish: an investigation of how children with congenital heart disease experience and perform movement in daily life

A1 - Bjorbaekmo,W.

A1 - Engelsrud,G.

Y1 - 2008/11//

N1 - Bjorbaekmo, W. Engelsrud, G

Child: care, health and development

7602632, c9x

IM

Journal Article

English

KW - Medline

KW - Adaptation

KW - Psychological

KW - Child

KW - Energy Metabolism

KW - Heart Defects

KW - Congenital/me [Metabolism]

KW - Congenital/pp [Physiopathology]

KW - Congenital/px [Psychology]

KW - Humans

KW - Motor Activity

KW - Parents

KW - Play and Playthings/px [Psychology]

KW - Risk Factors

RP - NOT IN FILE

SP - 781

EP - 788

JF - Child: Care, Health & Development

JA - Child Care Health Dev.

VL - 34

IS - 6

CY - England

N2 - **BACKGROUND:** Because of dramatic medical improvements, most children with congenital heart disease (CHD) survive into adulthood. Nevertheless, they remain in need of long-term health care. Living with CHD implies having diminished aerobic capacity. As far as we know, no previous study within healthcare research has focused on how children with CHD experience movement and activity in daily life. **METHODS:** In order to examine this topic, a qualitative approach was employed that combined both interviews and observation of 11 children between 7 and 12 years of age and interviews with their parents. The theoretical base of the article is inspired by the philosopher Maurice Merleau-Ponty and his theory of movement. We use his descriptions of movement as intentional expressions to illuminate how children with CHD move in daily life. **RESULTS:** The study shows how the children use different strategies to participate in play and that they move to fulfill their first priority: to be together with other children. Despite having limited physical endurance, the children perceive themselves as having the same capabilities as other children and as acting as they do. At the same time, they are not unaware of their own limitations. They adjust and respond to the challenges they face in the different situations to which they are exposed. On one hand, they want others to take their limitations into consideration, while, on the other hand, they do not want others to know about these limitations.

**CONCLUSIONS:** In our analysis, we interpret that living with CHD creates situations where the children constantly face their limitations, the gazes of others and their own wish to participate

SN - 1365-2214

AD - University of Oslo, Institute of Nursing and Health Sciences, Section of Health Sciences, Oslo, Norway.

w.s.bjorbakmo@medisin.uio.no

UR - 18947344

ER -

TY - JOUR

ID - 277

T1 - Places to play: association of park space and facilities with healthy weight status among children

A1 - Potwarka,L.R.

A1 - Kaczynski,A.T.

A1 - Flack,A.L.

Y1 - 2008/10//

N1 - Potwarka, Luke R. Kaczynski, Andrew T. Flack, Andrea L

Journal of community health

7600747, hut

IM

Journal Article

English

KW - Medline

KW - Adolescent

KW - Body Weight

KW - Child

KW - Preschool

KW - Female

KW - Humans

KW - Male

KW - Ontario

KW - Play and Playthings

KW - Public Facilities

KW - Urban Population

RP - NOT IN FILE

SP - 344

EP - 350

JF - Journal of Community Health

JA - J Community Health

VL - 33

IS - 5

CY - United States

N2 - The purpose of this study was to examine how healthy weight status among youth was related to (i) three proximity-based park variables: number of parks within 1 km of home, total area of parkland within 1 km, and distance to the closest park from home, and (ii) the availability of 13 specific park facilities within 1 km of the home. Data were collected from parents of children living in four neighborhoods of a medium-sized Canadian city. Logistic regression analyses revealed that none of the three proximity-based park variables was significantly associated with healthy weight status among children in the sample. However, when availability of the 13 park facilities was examined, children with a park playground within 1 km were almost five times more likely to be classified as being of a healthy weight rather than at risk or overweight compared to those children without playgrounds in nearby parks. Results suggest that availability of certain park facilities may play a more important role in promoting physical activity and healthy weight status among children than availability of park space in general. Implications for park design are discussed

SN - 0094-5145

AD - Department of Recreation and Leisure Studies, University of Waterloo, Waterloo, ON, Canada N2L 3G1.

lrpotwar@ahsmail.uwaterloo.ca

UR - 18484170

ER -

TY - JOUR

ID - 278

T1 - Exercise aids, neighborhood safety, and physical activity in adolescents and parents

A1 - Kerr,J.

A1 - Norman,G.J.

A1 - Sallis,J.F.

A1 - Patrick,K.



Y1 - 2008/07//

N1 - Kerr, Jacqueline. Norman, Gregory J. Sallis, James F. Patrick, Kevin  
Medicine and science in sports and exercise  
8005433, mg8

IM, S

Journal Article. Research Support, N.I.H., Extramural

English

KW - Medline

KW - Adolescent

KW - Adolescent Behavior

KW - Adult

KW - Child

KW - Confidence Intervals

KW - Environment Design

KW - Equipment and Supplies

KW - Exercise

KW - Female

KW - Health Behavior

KW - Humans

KW - Logistic Models

KW - Male

KW - Motor Activity

KW - Odds Ratio

KW - Parents

KW - Play and Playthings

KW - Questionnaires

KW - Residence Characteristics

KW - Safety

KW - Sports

RP - NOT IN FILE

SP - 1244

EP - 1248

JF - Medicine & Science in Sports & Exercise

JA - Med Sci Sports Exerc.

VL - 40

IS - 7

CY - United States

N2 - PURPOSE: To investigate the relationships among exercise aids available at home, physical activity, and perceived neighborhood safety. METHODS: Physical activity was assessed using the 7-d recall interview for adolescents (n = 878) and the International Physical Activity Questionnaire for parents (n = 853). Parents reported exercise aids such as fitness equipment, running shoes, and dogs in their household using a 16-item checklist and perceptions of neighborhood safety using the Neighborhood Environment Walkability Scale. Physical activity scores were dichotomized to represent meeting weekly guidelines for children (300 min) and adults (150 min). Logistic regression analyses investigated the interaction between exercise equipment and neighborhood safety in relation to the two physical activity outcomes, controlling for participant demographics. RESULTS: The number of home-use (OR = 1.27) and outdoor-use (OR = 1.24) exercise aids was significantly related to physical activity in adolescent girls but not boys. An interaction effect indicated that the relationship between home-use exercise equipment and physical activity levels was specific for girls in neighborhoods perceived as less-safe (OR = 4.40), rather than those perceived as safe (OR = 1.07, P < 0.01). In the parent sample, home-use (OR = 1.24) and outdoor use (OR = 1.16) exercise aids were significantly related to physical activity levels. An interaction between outdoor exercise aids and safety indicated that the effect was specific to parents who lived in neighborhoods perceived as safe (OR = 2.43) compared to those perceived as less-safe (OR = 0.91, P < 0.01). CONCLUSION: Girls living in neighborhoods their parents perceive to be less-safe may benefit from having exercise equipment they can use in the home. Parents living in neighborhoods perceived to be safe may benefit from having exercise aids that they can use outside

SN - 0195-9131

AD - 1Department of Psychology, San Diego State University, University of California, San Diego, CA 92103, USA. jkerr@projects.sdsu.edu

UR - 18580403

ER -

TY - JOUR

ID - 279

T1 - An investigation of school playground safety practices as reported by school nurses

A1 - Hudson,S.D.

A1 - Olsen,H.M.

A1 - Thompson,D.

Y1 - 2008/06//

N1 - Hudson, Susan D. Olsen, Heather M. Thompson, Donna

The Journal of school nursing : the official publication of the National Association of School Nurses  
bgs, 9206498

N

Evaluation Studies. Journal Article

English

KW - Medline

KW - Attitude of Health Personnel

KW - Child

KW - Communication

KW - Documentation

KW - Equipment Safety

KW - Health Knowledge

KW - Attitudes

KW - Practice

KW - Health Services Needs and Demand

KW - Human Engineering

KW - Humans

KW - Nurse's Role/px [Psychology]

KW - Nurse's Role

KW - Nursing Evaluation Research

KW - Nursing Methodology Research

KW - Nursing Staff/ed [Education]

KW - Nursing Staff/og [Organization & Administration]

KW - Nursing Staff/px [Psychology]

KW - Play and Playthings

KW - Questionnaires

KW - Safety Management/og [Organization & Administration]

KW - School Nursing/ed [Education]

KW - School Nursing/og [Organization & Administration]

KW - United States

RP - NOT IN FILE

SP - 138

EP - 144

JF - Journal of School Nursing

JA - J Sch Nurs

VL - 24

IS - 3

CY - United States

N2 - The purpose of this study was to investigate school playground safety practices. The study used a purposeful sample of school nurses who attended a playground safety workshop at the 2006 National Association of School Nurses annual conference. Seventy-five questionnaires were distributed, and 64 useable questionnaires were returned. The responses indicated that little attention is being given to providing safe playground environments in schools as measured by best practices of supervision, age-appropriate design, fall

surfacing, and equipment maintenance. Participants pointed to the need for better supervision and supervision training, careful selection of age-appropriate equipment, maintaining adequate fall surfaces under the equipment, and ensuring that equipment is properly maintained and repaired. The study also revealed that school nurses believe they could play a role in playground injury prevention through the collection and analysis of injury data, communication to administrators about the need for comprehensive planning of the play environment, and becoming active members of playground safety committees

SN - 1059-8405

AD - National Program for Playground Safety, University of Northern Iowa, School of Health, Physical Education, and Leisure Services, Cedar Falls, Iowa, USA

UR - 18557672

ER -

TY - JOUR

ID - 280

T1 - Sex-typical play: masculinization/defeminization in girls with an autism spectrum condition

A1 - Knickmeyer,R.C.

A1 - Wheelwright,S.

A1 - Baron-Cohen,S.B.

Y1 - 2008/07//

N1 - Knickmeyer, Rebecca C. Wheelwright, Sally. Baron-Cohen, Simon B

Journal of autism and developmental disorders

7904301, hgw

IM

Journal Article. Research Support, Non-U.S. Gov't

English

KW - Medline

KW - Adolescent

KW - Autistic Disorder/di [Diagnosis]

KW - Autistic Disorder/pp [Physiopathology]

KW - Autistic Disorder/px [Psychology]

KW - Brain/pp [Physiopathology]

KW - Child

KW - Preschool

KW - Fantasy

KW - Female

KW - Gender Identity

KW - Humans

KW - Imagination/ph [Physiology]

KW - Male

KW - Personality Assessment

KW - Play and Playthings

KW - Pregnancy

KW - Prenatal Exposure Delayed Effects/pp [Physiopathology]

KW - Prenatal Exposure Delayed Effects/px [Psychology]

KW - Reference Values

KW - Testosterone/ph [Physiology]

RP - NOT IN FILE

SP - 1028

EP - 1035

JF - Journal of Autism & Developmental Disorders

JA - J Autism Dev.Disord

VL - 38

IS - 6

CY - United States

N2 - We tested the hypothesis that prenatal masculinization of the brain by androgens increases risk of developing an autism spectrum condition (ASC). Sex-typical play was measured in n = 66 children diagnosed

with an ASC and n = 55 typically developing age-matched controls. Consistent with the hypothesis, girls with autism did not show the female-typical play preferences, though this was only seen on non-pretence items. Boys with autism showed a preference for male play on non-pretence items, in keeping with their sex. Girls with autism engaged in more pretend play than boys with autism, suggesting that pretence is relatively more protected in females with autism. We conclude that play preference studies in ASC provide partial support for the fetal androgen theory

SN - 0162-3257

AD - Department of Psychiatry, Autism Research Center, University of Cambridge, Douglas House, Cambridge, UK. rebecca\_knickmeyer@med.unc.edu

UR - 17985222

ER -

TY - JOUR

ID - 281

T1 - Attachment narratives and behavioral and emotional symptoms in an ethnically diverse, at-risk sample

A1 - Futh,A.

A1 - O'Connor,T.G.

A1 - Matias,C.

A1 - Green,J.

A1 - Scott,S.

Y1 - 2008/06//

N1 - Futh, Annabel. O'Connor, Thomas G. Matias, Carla. Green, Jonathan. Scott, Stephen

Journal of the American Academy of Child and Adolescent Psychiatry

hg5, 8704565

IM

Journal Article. Research Support, Non-U.S. Gov't

English

KW - Medline

KW - Affective Symptoms/di [Diagnosis]

KW - Affective Symptoms/eh [Ethnology]

KW - Affective Symptoms/px [Psychology]

KW - Antisocial Personality Disorder/di [Diagnosis]

KW - Antisocial Personality Disorder/eh [Ethnology]

KW - Antisocial Personality Disorder/px [Psychology]

KW - Child

KW - Preschool

KW - England

KW - Ethnic Groups/px [Psychology]

KW - Female

KW - Health Surveys

KW - Humans

KW - Male

KW - Narration

KW - Peer Group

KW - Personality Assessment/sn [Statistics & Numerical Data]

KW - Play and Playthings

KW - Poverty Areas

KW - Psychometrics/sn [Statistics & Numerical Data]

KW - Reactive Attachment Disorder/di [Diagnosis]

KW - Reactive Attachment Disorder/eh [Ethnology]

KW - Reactive Attachment Disorder/px [Psychology]

KW - Reproducibility of Results

KW - Social Adjustment

KW - Sociometric Techniques

RP - NOT IN FILE

SP - 709

EP - 718

JF - Journal of the American Academy of Child & Adolescent Psychiatry

JA - J Am Acad.Child Adolesc Psychiatry

VL - 47

IS - 6

CY - United States

N2 - **OBJECTIVE:** To examine the clinical correlates and predictions from attachment narratives in a sample of early school-age children from a high psychosocial risk, ethnically diverse sample. **METHOD:** A total of 113 children were assessed using the Manchester Child Attachment Story Task, a semistructured assessment of children's attachment representations. Parents and teachers provided data using the Strengths and Difficulties Questionnaire. Peer nominations of popularity and antisocial behavior were also obtained. **RESULTS:** Significant associations that were modest to moderate in magnitude were obtained between attachment narrative scales indexing security, coherence, and disorganization with multiple indices of children's behavioral and emotional adjustment, prosocial behavior and competence; these associations held across ethnic groups and were independent of psychosocial risk. **CONCLUSIONS:** The findings build on and extend support for the use of attachment narrative assessments in the clinical context and demonstrate their applicability and validity across a broad range of ethnicity and social contexts

SN - 1527-5418

AD - King's College London, Institute of Psychiatry, UK

UR - 18434917

ER -

TY - JOUR

ID - 282

T1 - Peer tutoring to prevent firearm play acquisition, generalization, and long-term maintenance of safety skills

A1 - Jostad,C.M.

A1 - Miltenberger,R.G.

A1 - Kelso,P.

A1 - Knudson,P.

Y1 - 2008///

N1 - Jostad, Candice M. Miltenberger, Raymond G. Kelso, Pamela. Knudson, Peter

Journal of applied behavior analysis

0174763, hdr

IM

Journal Article

English

KW - Medline

KW - Behavior Therapy/mt [Methods]

KW - Child

KW - Child Day Care Centers

KW - Preschool

KW - Feedback

KW - Psychological

KW - Female

KW - Firearms

KW - Follow-Up Studies

KW - Generalization (Psychology)

KW - Humans

KW - Imitative Behavior

KW - Male

KW - Peer Group

KW - Play and Playthings

KW - Practice (Psychology)

KW - Reinforcement

KW - Social

KW - Safety  
KW - Social Environment  
KW - Transfer (Psychology)  
RP - NOT IN FILE  
SP - 117  
EP - 123  
JF - Journal of Applied Behavior Analysis  
JA - J Appl.Behav Anal.  
VL - 41  
IS - 1  
CY - United States  
N2 - Hundreds of accidental injuries and deaths to children occur annually in the United States as a result of firearm play. Behavioral skills training (BST) and in situ training have been found to be effective in teaching children the skills to use if they find a firearm, but training requires substantial time and effort. The current study examined the use of peers as tutors as a potential way to decrease the time and resources needed to teach these safety skills to youngsters. Peer trainers conducted BST and in situ training with other children. Children taught by the peer trainers acquired the safety skills and demonstrated them in naturalistic situations in which the skills were needed. Furthermore, all of the peer trainers acquired and maintained the skills. These results support the use of peer tutoring for teaching safety skills to other children  
SN - 0021-8855  
AD - North Dakota State University, USA  
UR - 18468285  
ER -

TY - JOUR  
ID - 283  
T1 - Safe play and its effect on childhood obesity  
A1 - Mathieu,J.  
Y1 - 2008/05//  
N1 - Mathieu, Jennifer  
Journal of the American Dietetic Association  
h6f, 7503061  
AIM, IM  
Journal Article  
English  
KW - Medline  
KW - Child  
KW - Exercise/ph [Physiology]  
KW - Female  
KW - Health Promotion  
KW - Humans  
KW - Life Style  
KW - Male  
KW - Obesity/ep [Epidemiology]  
KW - Obesity/pc [Prevention & Control]  
KW - Play and Playthings  
KW - Risk Factors  
KW - Safety  
KW - Television  
RP - NOT IN FILE  
SP - 774  
EP - 775  
JF - Journal of the American Dietetic Association  
JA - J Am Diet Assoc.  
VL - 108  
IS - 5

CY - United States  
SN - 0002-8223  
UR - 18442496  
ER -

TY - JOUR

ID - 284

T1 - Physical activity among adolescents. When do parks matter?

A1 - Babey,S.H.

A1 - Hastert,T.A.

A1 - Yu,H.

A1 - Brown,E.R.

Y1 - 2008/04//

N1 - Babey, Susan H. Hastert, Theresa A. Yu, Hongjian. Brown, E Richard  
American journal of preventive medicine

8704773, apl

IM

Journal Article. Research Support, Non-U.S. Gov't

English

KW - Medline

KW - Adolescent

KW - Adolescent Behavior

KW - California

KW - Child

KW - Environment Design

KW - Female

KW - Health Surveys

KW - Humans

KW - Logistic Models

KW - Male

KW - Motor Activity

KW - Play and Playthings

KW - Public Facilities

KW - Residence Characteristics

KW - Safety

KW - Socioeconomic Factors

RP - NOT IN FILE

SP - 345

EP - 348

JA - American Journal of Preventive Medicine

VL - 34

IS - 4

CY - Netherlands

N2 - **BACKGROUND:** The availability of places to engage in physical activity may influence physical activity levels. This study examined whether the relationship between physical activity and access to parks differs depending on adolescents' sociodemographic, housing, and neighborhood characteristics. **METHODS:** Data were analyzed from 4010 adolescents who responded to the 2003 California Health Interview Survey (CHIS). Analyses were conducted in 2005-2006. Five sets of logistic regressions were conducted to examine the relationship between physical activity and access to a safe park among adolescents living in (1) urban versus rural areas; (2) apartment buildings versus houses, (3) neighborhoods perceived as unsafe versus safe; (4) lower-versus higher-income families; and (5) adolescents who were Latino, African American, Asian, or white. Analyses also examined interactions between park access and these factors. **RESULTS:** Access to a safe park was positively associated with regular physical activity and negatively associated with inactivity for adolescents in urban areas, but not rural areas. Additionally, adolescents with access to a safe park were less likely to be inactive than those without access among those living in (1) apartment buildings, (2) unsafe neighborhoods, and (3) lower-income families. Park access was not associated with regular physical activity for these groups. The

association between park access and physical activity varied by race/ethnicity. CONCLUSIONS: These findings suggest that the relationship between physical activity and access to parks differs depending on adolescents' sociodemographic, housing, and neighborhood characteristics, and that parks may be particularly important for promoting physical activity among urban adolescents

SN - 0749-3797

AD - Center for Health Policy Research, University of California at Los Angeles, Los Angeles, California 90024, USA. sbabey@ucla.edu

UR - 18374249

ER -

TY - JOUR

ID - 285

T1 - Neighborhood disorder, perceived safety, and readiness to encourage use of local playgrounds

A1 - Miles,R.

Y1 - 2008/04//

N1 - Miles, Rebecca

American journal of preventive medicine

8704773, apl

IM

Journal Article

English

KW - Medline

KW - Adult

KW - Child

KW - Cross-Sectional Studies

KW - Environment Design

KW - Europe

KW - Female

KW - Humans

KW - Male

KW - Middle Aged

KW - Motor Activity

KW - Motor Vehicles

KW - Parents/px [Psychology]

KW - Perception

KW - Play and Playthings

KW - Public Facilities

KW - Residence Characteristics

KW - Safety

KW - Walking

RP - NOT IN FILE

SP - 275

EP - 281

JA - American Journal of Preventive Medicine

VL - 34

IS - 4

CY - Netherlands

N2 - BACKGROUND: Knowledge of the association between the neighborhood physical environment and adults' readiness to encourage children's use of local playgrounds, and the extent to which perceived safety acts as a mediator, can inform efforts to increase children's physical activity. METHODS: Data were obtained from seven European cities based on a cross-sectional household survey conducted between 2001 and 2002. The sample included 2123 household informants (from a total of 2782 households) with a median age of 48 years; 65% were women, 66% were married, and 33% had achieved a secondary education. Indicators of local neighborhood physical disorder (litter, graffiti, lack of greenery), traffic volume, and land use were directly observed by trained surveyors. Perceived safety, encouragement of playground use, and physical activity levels were assessed with self-reported measures. Analyses were conducted in 2007. RESULTS: Respondents in



neighborhoods showing signs of low or moderate physical disorder compared to high physical disorder had slightly over twice the odds of encouraging children to use local playgrounds ( $p < 0.01$ ). The percentage of the effect of neighborhood physical disorder accounted for by perceived safety was between 15% and 20%. Neighborhood physical disorder was associated only with adults' occasional involvement in sports or exercise and only among women ( $p < 0.05$ ); perceived safety was not significantly associated with physical activity for either men or women. **CONCLUSIONS:** Neighborhood physical environments and perceived safety influence adults' readiness to encourage children's physical activity and women's occasional involvement in sports or exercise. Health promotion strategies designed to upgrade the environments near where children live and to address parental safety concerns merit further exploration

SN - 0749-3797

AD - Department of Urban and Regional Planning, Florida State University, Tallahassee, Florida 32306-2280, USA. rebecca.miles@fsu.edu

UR - 18374240

ER -

TY - JOUR

ID - 286

T1 - Parenting behaviors and attitudes about supervision among parents of acutely poisoned children

A1 - Sinclair, K.A.

A1 - Morrongiello, B.A.

A1 - Dowd, M.D.

Y1 - 2008/03//

N1 - Sinclair, Kelly A. Morrongiello, Barbara A. Dowd, M Denise

Ambulatory pediatrics : the official journal of the Ambulatory Pediatric Association

101089367

IM

Journal Article

English

KW - Medline

KW - Adolescent

KW - Adult

KW - Attitude

KW - Child

KW - Preschool

KW - Female

KW - Humans

KW - Infant

KW - Male

KW - Middle Aged

KW - Parenting/px [Psychology]

KW - Parents/px [Psychology]

KW - Play and Playthings

KW - Poisoning

KW - Safety

RP - NOT IN FILE

SP - 135

EP - 138

JF - Ambulatory Pediatrics

JA - Ambul. Pediatr

VL - 8

IS - 2

CY - United States

N2 - **OBJECTIVE:** This study describes the supervision beliefs of parents of children with unintentional poisonings and examines the relationship between supervision beliefs, household composition, and parental age. **METHODS:** Children aged  $< 60$  months presenting with an unintentional poisoning to an emergency department or urgent care of an urban, academic medical center in Kansas City, Missouri, were identified. Parents

completed the Beliefs About Supervision Questionnaire (BAS-Q) by phone within 2 weeks of their child's visit. The questionnaire consisted of 14 child activity scenarios, each followed by 2 questions: What age would you permit your child to perform this activity without constant supervision? How often would you check on a child of this age while engaged in the activity? Two scores were derived: mean age across all scenarios (BAS-Age) and mean time until child is checked on across all scenarios (BAS-Time). RESULTS: One hundred parents completed the BAS-Q. The majority of respondents were mothers (82%), 40% had 2 or more children in the home aged 5 years or younger, and 61% had 2 or more adults living in the home. Pearson correlations revealed associations for BAS-Time with total children within the home ( $r = .28, P < .005$ ) and number of children aged 6 to 12 years in the home ( $r = .28, P < .005$ ). BAS-Age was not related to any aspect of household composition. CONCLUSION: Less vigorous parental supervision was associated with an increased number of children in the home. Parental supervision may be influenced by reliance on other children in the home

SN - 1539-4409

AD - Division of Emergency Medical Services, The Children's Mercy Hospital, Kansas City, Missouri 64113, USA. ksinclair@cmh.edu

UR - 18355743

ER -

TY - JOUR

ID - 287

T1 - Physical activity levels among children attending after-school programs

A1 - Trost,S.G.

A1 - Rosenkranz,R.R.

A1 - Dzewaltowski,D.

Y1 - 2008/04//

N1 - Trost, Stewart G. Rosenkranz, Richard R. Dzewaltowski, David

Medicine and science in sports and exercise

8005433, mg8

IM, S

Journal Article. Research Support, U.S. Gov't, Non-P.H.S.

English

KW - Medline

KW - Acceleration

KW - Anthropometry

KW - Body Mass Index

KW - Child

KW - Child Welfare

KW - Exercise/ph [Physiology]

KW - Female

KW - Health Status

KW - Humans

KW - Male

KW - Motor Activity

KW - School Health Services

KW - Schools

KW - Time Factors

RP - NOT IN FILE

SP - 622

EP - 629

JF - Medicine & Science in Sports & Exercise

JA - Med Sci Sports Exerc.

VL - 40

IS - 4

CY - United States

N2 - PURPOSE: To describe the physical activity (PA) levels of children attending after-school programs, 2) examine PA levels in specific after-school sessions and activity contexts, and 3) evaluate after-school PA differences in groups defined by sex and weight status. METHODS: One hundred forty-seven students in grades

3-6 (mean age: 10.1 +/- 0.7, 54.4% male, 16.5 % overweight (OW), 22.8% at-risk for OW) from seven after-school programs in the midwestern United States wore Actigraph GT1M accelerometers for the duration of their attendance to the program. PA was objectively assessed on six occasions during an academic year (three fall and three spring). Stored activity counts were uploaded to a customized data-reduction program to determine minutes of sedentary (SED), light (LPA), moderate (MPA), vigorous (VPA), and moderate-to-vigorous (MVPA) physical activity. Time spent in each intensity category was calculated for the duration of program attendance, as well as specific after-school sessions (e.g., free play, snack time). RESULTS: On average, participants exhibited 42.6 min of SED, 40.8 min of LPA, 13.4 min of MPA, and 5.3 min of VPA. The average accumulation of MVPA was 20.3 min. Boys exhibited higher levels of MPA, VPA, and MVPA, and lower levels of SED and LPA, than girls. OW and at-risk-for-OW students exhibited significantly less VPA than nonoverweight students, but similar levels of LPA, MPA, and MVPA. MVPA levels were significantly higher during free-play activity sessions than during organized or structured activity sessions. CONCLUSION: After-school programs seem to be an important contributor to the PA of attending children. Nevertheless, ample room for improvement exists by making better use of existing time devoted to physical activity

SN - 0195-9131

AD - Department of Nutrition and Exercise Sciences, Oregon State University, Corvallis, OR 97333, USA.  
stewart.trost@oregonstate.edu

UR - 18317385

ER -

TY - JOUR

ID - 289

T1 - Playing it safe: the influence of neighbourhood safety on children's physical activity. A review. [Review]  
[72 refs]

A1 - Carver,A.

A1 - Timperio,A.

A1 - Crawford,D.

Y1 - 2008/06//

N1 - Carver, Alison. Timperio, Anna. Crawford, David

Health & place

din, 9510067

T

Journal Article. Review

English

KW - Medline

KW - Child

KW - Preschool

KW - Exercise

KW - Humans

KW - Play and Playthings

KW - Residence Characteristics

KW - Safety

KW - Victoria

RP - NOT IN FILE

SP - 217

EP - 227

JF - Health & Place

JA - Health Place

VL - 14

IS - 2

CY - England

N2 - Compared with previous generations, children spend less time playing outdoors and have lower participation rates in active transport. Many studies have identified lack of neighbourhood safety as a potential barrier to children's physical activity. This review describes concerns regarding 'stranger danger' and road safety, and discusses empirical studies that examine associations between neighbourhood safety and physical activity among youth. Variability of perceptions of safety between parents and youth are examined; 'social traps'

are identified; and physical/social environmental interventions aimed at improving neighbourhood safety are discussed. A research agenda is suggested for further study of perceived and objective measures of neighbourhood safety and their associations with children's physical activity. [References: 72]

SN - 1353-8292

AD - Centre for Physical Activity and Nutrition Research, School of Exercise and Nutrition Sciences, Deakin University, VIC, Australia. alison.carver@deakin.edu.au

UR - 17662638

ER -

TY - JOUR

ID - 290

T1 - Product recalls. Recalls: a bad summer for toys from China...but risks should be kept in perspective

Y1 - 2007/09//

N1 - Child health alert

9881972

K

Journal Article

English

KW - Medline

KW - Child

KW - China

KW - Consumer Product Safety

KW - Humans

KW - Lead

KW - Lead Poisoning/et [Etiology]

KW - Paint/to [Toxicity]

KW - Play and Playthings

RP - NOT IN FILE

SP - 5

EP - 6

JF - Child Health Alert

VL - 25

CY - United States

SN - 1064-4849

UR - 18273937

ER -

TY - JOUR

ID - 291

T1 - Maternal secure base support and preschoolers' secure base behavior in natural environments

A1 - Posada,G.

A1 - Kaloustian,G.

A1 - Richmond,M.K.

A1 - Moreno,A.J.

Y1 - 2007/12//

N1 - Posada, German. Kaloustian, Garene. Richmond, Melissa K. Moreno, Amanda J

Attachment & human development

100901315

IM

Journal Article. Research Support, Non-U.S. Gov't

English

KW - Medline

KW - Adult

KW - Child Behavior

KW - Child

KW - Preschool

KW - Female  
 KW - Humans  
 KW - Male  
 KW - Meta-Analysis as Topic  
 KW - Middle Aged  
 KW - Mother-Child Relations  
 KW - Object Attachment  
 KW - Play and Playthings  
 KW - Safety  
 KW - Social Environment  
 KW - United States  
 RP - NOT IN FILE  
 SP - 393  
 EP - 411  
 JF - Attachment & Human Development  
 JA - Attach.Hum.Dev.  
 VL - 9  
 IS - 4  
 CY - England

N2 - Bowlby and Ainsworth's theory of attachment poses that concurrent caregiving behavior is a key factor in influencing and maintaining a child's organization of secure-base behavior, and ultimately, security throughout childhood. Empirical demonstrations of the relation between the constructs after infancy are relatively scant and research is needed to examine the relation between the variables across a wide range of contexts, over longer observational periods, and in developmentally appropriate ways. Two studies of preschoolers and their mothers were conducted in naturalistic settings. Fifty child-mother middle-class dyads, predominantly Caucasian, participated in Study 1 and 40 in Study 2. The mean age for children was 52 months (Study 1) and 36 months (Study 2). In Study 1, a home and a playground visits were conducted. In Study 2, two home and a playground visits were conducted. Observers used the Maternal Behavior for Preschoolers Q-Set to provide age-relevant descriptions of maternal behavior, and the Attachment Q-Set to provide descriptions of child behavior. Overall, findings indicated that maternal secure base support was significantly related to the organization of child secure base behavior ( $r = .31$  and  $.49$  for Study 1 and Study 2, respectively). Results are discussed in terms of the importance of specifying caregiving domains and contexts of assessments, and their implications for attachment theory

SN - 1461-6734  
 AD - Purdue University, West Lafayette, IN 47907, USA. gposada@purdue.edu  
 UR - 18049935  
 ER -

TY - JOUR  
 ID - 292  
 T1 - When lead lurks in your nursery  
 A1 - Wallis,C.  
 Y1 - 2007/09/17/  
 N1 - Wallis, Claudia  
 Time  
 9877130, bqn  
 K  
 News  
 English  
 KW - Medline  
 KW - Child  
 KW - Preschool  
 KW - Humans  
 KW - Lead Poisoning/pc [Prevention & Control]  
 KW - Play and Playthings  
 KW - Safety Management/mt [Methods]

RP - NOT IN FILE

SP - 51

JF - Time

VL - 170

IS - 12

CY - United States

SN - 0040-781X

UR - 17969970

ER -

TY - JOUR

ID - 293

T1 - The food insecurity-obesity paradox: a review of the literature and the role food stamps may play.

[Review] [47 refs]

A1 - Dinour,L.M.

A1 - Bergen,D.

A1 - Yeh,M.C.

Y1 - 2007/11//

N1 - Dinour, Lauren M. Bergen, Dara. Yeh, Ming-Chin

Journal of the American Dietetic Association

h6f, 7503061

AIM, IM

Journal Article. Research Support, Non-U.S. Gov't. Review

English

KW - Medline

KW - Adolescent

KW - Adult

KW - Body Mass Index

KW - Child

KW - Preschool

KW - Diet/st [Standards]

KW - Female

KW - Food Services/sn [Statistics & Numerical Data]

KW - Food Services/ut [Utilization]

KW - Food Services

KW - Food Supply/sn [Statistics & Numerical Data]

KW - Health Status

KW - Humans

KW - Hunger

KW - Male

KW - Middle Aged

KW - Obesity/ep [Epidemiology]

KW - Poverty

KW - Risk Factors

KW - Sex Factors

RP - NOT IN FILE

SP - 1952

EP - 1961

JF - Journal of the American Dietetic Association

JA - J Am Diet Assoc.

VL - 107

IS - 11

CY - United States

N2 - During the past decade, rates of food insecurity and obesity have risen, and an association has been made between these two seemingly paradoxical states. Although this relationship has not been repeatedly seen in men, research suggests a correlation in women. Studies have not been able to consistently show a relationship in

children, because findings differ based on age, race/ethnicity, household income, and sex. Several proposed hypotheses explain why a correlation between food insecurity and obesity exists in adults - especially women - but not in children. This review proposes a conceptual framework linking the Food Stamp Program and other coping strategies to the food insecurity-obesity relationship. This link has implications for Food Stamp Program policy changes, welfare reform, and poverty prevention. [References: 47]

SN - 0002-8223

AD - Graduate Center, City University of New York, New York, USA. LMDnutrition@gmail.com

UR - 17964316

ER -

TY - JOUR

ID - 294

T1 - Positive and protective: effects of early theory of mind on problem behaviors in at-risk preschoolers

A1 - Hughes,C.

A1 - Ensor,R.

Y1 - 2007/10//

N1 - Hughes, Claire. Ensor, Rosie

Journal of child psychology and psychiatry, and allied disciplines

hp3, 0375361

IM

Journal Article

English

KW - Medline

KW - Adaptation

KW - Psychological

KW - Affect

KW - Affective Symptoms/di [Diagnosis]

KW - Affective Symptoms/px [Psychology]

KW - Attention Deficit Disorder with Hyperactivity/di [Diagnosis]

KW - Attention Deficit Disorder with Hyperactivity/px [Psychology]

KW - Attention Deficit and Disruptive Behavior Disorders/di [Diagnosis]

KW - Attention Deficit and Disruptive Behavior Disorders/px [Psychology]

KW - Child Behavior Disorders/di [Diagnosis]

KW - Child Behavior Disorders/px [Psychology]

KW - Child Development Disorders

KW - Pervasive/di [Diagnosis]

KW - Pervasive/px [Psychology]

KW - Child

KW - Preschool

KW - Conduct Disorder/di [Diagnosis]

KW - Conduct Disorder/px [Psychology]

KW - Culture

KW - Female

KW - Follow-Up Studies

KW - Humans

KW - Male

KW - Mother-Child Relations

KW - Parenting/px [Psychology]

KW - Personal Construct Theory

KW - Personality Assessment

KW - Play and Playthings

KW - Prognosis

KW - Psychosocial Deprivation

KW - Risk Factors

RP - NOT IN FILE

SP - 1025

EP - 1032

JF - Journal of Child Psychology & Psychiatry & Allied Disciplines

JA - J Child Psychol.Psychiatry

VL - 48

IS - 10

CY - England

N2 - BACKGROUND: Exposure to harsh parenting and children's skills in 'Theory of Mind' (ToM) show independent and interacting associations with problem behaviors at age 2 (Hughes & Ensor, 2006). This study examined whether these age-2 measures also predict age-4 problem behaviors. METHOD: In a socially diverse sample (N = 120), multi-informant, multi-measure, multi-setting ratings indexed problem behaviors at ages 2, 3 and 4; children completed both ToM and verbal-ability tasks at age 2, while video-based ratings of maternal negative affect and control within dyadic mother-child play indexed harsh parenting. RESULTS: Age-2 harsh parenting and ToM were independent and interacting predictors of age-4 problem behaviors, even with age-2 problem behaviors, verbal ability and social disadvantage all controlled. The interaction between harsh parenting and ToM distinguished persistent vs. diminishing problem behaviors. CONCLUSIONS: Both child and family characteristics predict increases in problem behaviors from 2 to 4; adverse effects of harsh parenting are attenuated for children with good ToM skills

SN - 0021-9630

AD - Centre for Family Research, University of Cambridge, UK. ch288@cam.ac.uk

UR - 17915003

ER -

TY - JOUR

ID - 295

T1 - Making an "A" in playground injury prevention

A1 - Roper,J.D.

Y1 - 2007/09//

N1 - Roper, Jean Dobson

School nurse news

100956395

N

Journal Article

English

KW - Medline

KW - Adolescent

KW - Child

KW - Child Welfare

KW - Equipment Safety

KW - Humans

KW - Play and Playthings

KW - Program Development

KW - Risk Factors

KW - Safety/st [Standards]

KW - School Health Services

KW - School Nursing

KW - Social Marketing

KW - United States

KW - Wounds and Injuries/pc [Prevention & Control]

RP - NOT IN FILE

SP - 33

EP - 35

JF - School Nurse News

VL - 24

IS - 4

CY - United States

SN - 1080-7543



AD - Kingston City School District, NY, USA. jroper@kingstoncityschools.org  
UR - 17913105  
ER -

TY - JOUR

ID - 297

T1 - Trajectories of maternal depressive symptoms, maternal sensitivity, and children's functioning at school entry

A1 - Campbell,S.B.

A1 - Matestic,P.

A1 - von,Stauffenberg C.

A1 - Mohan,R.

A1 - Kirchner,T.

Y1 - 2007/09//

N1 - Campbell, Susan B. Matestic, Patricia. von Stauffenberg, Camilla. Mohan, Roli. Kirchner, Thomas  
Developmental psychology

0260564, cn8

IM

Journal Article. Multicenter Study. Research Support, N.I.H., Extramural  
English

KW - Medline

KW - Child

KW - Child of Impaired Parents/px [Psychology]

KW - Preschool

KW - Depression/di [Diagnosis]

KW - Depression/px [Psychology]

KW - Female

KW - Humans

KW - Infant

KW - Internal-External Control

KW - Longitudinal Studies

KW - Male

KW - Maternal Behavior/px [Psychology]

KW - Mother-Child Relations

KW - Mothers/px [Psychology]

KW - Personality Assessment

KW - Play and Playthings

KW - Social Adjustment

KW - Socioeconomic Factors

RP - NOT IN FILE

SP - 1202

EP - 1215

JF - Developmental Psychology

JA - Dev.Psychol.

VL - 43

IS - 5

CY - United States

N2 - Using data from the National Institute of Child Health and Human Development Study of Early Child Care and Youth Development, the authors modeled trajectories of maternal depressive symptoms from infant age 1 month to 7 years. The authors identified 6 trajectories of maternal depressive symptoms: high-chronic, moderate-increasing, high-decreasing, intermittent, moderate-stable, and low-stable. Women on these depression trajectories varied in sociodemographic risk and in changes in observed maternal sensitivity over time. Maternal sensitivity was generally higher and increased when depressive symptoms were low; sensitivity was lower and decreased when depressive symptoms were either high or increasing. Child outcomes at 1st grade were examined by trajectory group. The authors discuss the complexity of disentangling maternal symptoms

from maternal sensitivity and sociodemographic risk when predicting children's functioning. PsycINFO Database Record (c) 2007 APA, all rights reserved

SN - 0012-1649

AD - Department of Psychology, University of Pittsburgh, PA 15260, USA. sbcamp@pitt.edu

UR - 17723045

ER -

TY - JOUR

ID - 298

T1 - Falls from playground equipment: will the new Australian playground safety standard make a difference and how will we tell?

A1 - Mitchell,R.

A1 - Sherker,S.

A1 - Cavanagh,M.

A1 - Eager,D.

Y1 - 2007/08//

N1 - Mitchell, Rebecca. Sherker, Shauna. Cavanagh, Margaret. Eager, David

Health promotion journal of Australia : official journal of Australian Association of Health Promotion Professionals

9710936

IM

Comparative Study. Journal Article. Research Support, Non-U.S. Gov't

English

KW - Medline

KW - Accidental Falls/pc [Prevention & Control]

KW - Accidental Falls/sn [Statistics & Numerical Data]

KW - Adolescent

KW - Age Distribution

KW - Child

KW - Preschool

KW - Craniocerebral Trauma/ep [Epidemiology]

KW - Craniocerebral Trauma/et [Etiology]

KW - Female

KW - Hospitalization/sn [Statistics & Numerical Data]

KW - Humans

KW - Incidence

KW - Infant

KW - Newborn

KW - Length of Stay

KW - Male

KW - New South Wales/ep [Epidemiology]

KW - Play and Playthings/in [Injuries]

KW - Risk Assessment

KW - Safety/st [Standards]

RP - NOT IN FILE

SP - 98

EP - 104

JF - Health Promotion Journal of Australia

JA - HEALTH PROMOT J AUST

VL - 18

IS - 2

CY - Australia

N2 - ISSUE ADDRESSED: This study describes the trend in incidence of hospitalised falls from playground equipment of children aged 14 years or less in New South Wales (NSW) and considers the potential effectiveness of playground safety standards in reducing the impact of playground-related injuries. METHOD: Hospitalisations of children aged 14 years or less following a fall from playground equipment were identified

from the NSW hospitalisation data for the financial years 1992/93 to 2003/04 and described. RESULTS: During 1992/93 to 2003/04 there were 16,828 hospitalisations of children aged 0-14 years as a result of a fall from playground equipment, at a rate of 106.6 per 100,000 children. The incidence of hospitalisation increased from 83.3 to 130.3 per 100,000 children between 1992/93 to 2003/04. Males aged 5-9 years had the highest rate of hospitalisation at 198.4 per 100,000 children. Injury type varied by age group, but injuries to the elbow and forearm were common for all age groups. The rate of upper limb fractures that resulted in hospitalisation increased, while the rate of serious head injuries decreased. CONCLUSIONS: While severe head injuries have declined between 1992/93 to 2003/04, the increasing trend of upper limb fractures is of concern. Many factors need to be taken into account to assess the effectiveness of playground safety standards. The collection of exposure data is also crucial to be able to calculate the true risk associated with childhood falls from playground equipment

SN - 1036-1073

AD - NSW Injury Risk Management Research Centre, University of New South Wales.

r.mitchell@unsw.edu.au

UR - 17663656

ER -

TY - JOUR

ID - 299

T1 - Persistence of overweight among young children living in low income communities in Ontario

A1 - Evers,S.

A1 - Arnold,R.

A1 - Hamilton,T.

A1 - Midgett,C.

Y1 - 2007/06//

N1 - Evers, Susan. Arnold, Robert. Hamilton, Theresa. Midgett, Corina

Journal of the American College of Nutrition

h51, 8215879

IM

Journal Article. Research Support, Non-U.S. Gov't

English

KW - Medline

KW - Body Height/ph [Physiology]

KW - Body Mass Index

KW - Body Weight/ph [Physiology]

KW - Child

KW - Child Development

KW - Child Nutritional Physiological Phenomena/ph [Physiology]

KW - Preschool

KW - Diet

KW - Exercise/ph [Physiology]

KW - Female

KW - Humans

KW - Male

KW - Obesity/ep [Epidemiology]

KW - Obesity/et [Etiology]

KW - Obesity/pc [Prevention & Control]

KW - Ontario

KW - Overweight

KW - Play and Playthings

KW - Poverty

KW - Predictive Value of Tests

KW - Prevalence

KW - Risk Assessment

KW - Risk Factors

KW - Weight Gain/ph [Physiology]

RP - NOT IN FILE

SP - 219

EP - 224

JF - Journal of the American College of Nutrition

JA - J Am Coll.Nutr

VL - 26

IS - 3

CY - United States

N2 - OBJECTIVE: The rise in the prevalence of overweight in pediatric populations is a major health concern.

Little is known however, about the prevalence of overweight in younger children. Our objectives were to

determine the annual prevalence of overweight in children from junior kindergarten (JK) to grade 3; to assess

the persistence of overweight over this time period; and, to identify factors associated with overweight in this

group. METHODS: Annual interviews were completed with parents (primarily the mother) living in

economically disadvantaged communities in Ontario who are participating in the Better Beginnings, Better

Futures project. Weight and height were measured annually for the children (n=760) beginning in JK. Risk of

overweight was defined as body mass index (BMI)  $\geq$  85th to  $<$  95th percentile; overweight was BMI  $\geq$

95th percentile. Parents' height and weight were self-reported; BMI  $\geq$  25 was considered overweight.

RESULTS: The risk of overweight among children ranged from 14.1% to 17.5%; the prevalence of overweight

increased from 9.9% to 15.2%; 68.2% (15/22) of the children who were overweight in JK were  $>$ 95th percentile

in grade 3. BMI  $\geq$  85th to  $<$  95th percentile or  $\geq$  95th percentile in JK were strongly predictive of

overweight in grade 3. Almost 50% of the mothers were overweight. CONCLUSIONS: A high prevalence of

overweight was found in young children; and, for a large proportion, their early weight status persisted.

Strategies promoting healthy eating and physical activity for both children and parents are essential

SN - 0731-5724

AD - Department of Family Relations and Applied Nutrition, University of Guelph, Guelph, ON N1G 2W1,

Canada. severs@uoguelph.ca

UR - 17634166

ER -

TY - JOUR

ID - 300

T1 - Waterslide exit velocities, user behaviours and injury prevention

A1 - Blitvich,J.D.

A1 - McElroy,G.K.

Y1 - 2007/03//

N1 - Blitvich, J D. McElroy, G K

International journal of injury control and safety promotion

101247254

IM

Journal Article

English

KW - Medline

KW - Acceleration

KW - Australia/ep [Epidemiology]

KW - Child

KW - Child Behavior

KW - Humans

KW - Life Style

KW - Pilot Projects

KW - Play and Playthings/in [Injuries]

KW - Posture

KW - Risk Assessment

KW - Risk Factors

KW - Risk-Taking

KW - Safety

KW - Swimming Pools/sn [Statistics & Numerical Data]

KW - Wounds and Injuries/ep [Epidemiology]  
KW - Wounds and Injuries/et [Etiology]  
KW - Wounds and Injuries/pc [Prevention & Control]  
RP - NOT IN FILE  
SP - 54  
EP - 56  
JF - International Journal of Injury Control & Safety Promotion  
JA - Int.J Inj.Contr.Saf Promot  
VL - 14  
IS - 1  
CY - England  
SN - 1745-7300  
AD - School of Human Movement and Sport Sciences, University of Ballarat, PO Box 663, Ballarat, Vic 3350, Australia. j.blitvich@ballarat.edu.au  
UR - 17624012  
ER -  
  
TY - JOUR  
ID - 301  
T1 - Trends in fall injuries associated with children's outdoor climbing frames  
A1 - Ball,D.J.  
Y1 - 2007/03//  
N1 - Ball, David J  
International journal of injury control and safety promotion  
101247254  
IM  
Journal Article. Research Support, Non-U.S. Gov't  
English  
KW - Medline  
KW - Accidental Falls/sn [Statistics & Numerical Data]  
KW - Adolescent  
KW - Child  
KW - Preschool  
KW - Equipment Safety  
KW - Great Britain/ep [Epidemiology]  
KW - Humans  
KW - Pilot Projects  
KW - Play and Playthings/in [Injuries]  
KW - Risk Assessment  
KW - Risk Factors  
KW - Safety  
KW - Wounds and Injuries/ep [Epidemiology]  
KW - Wounds and Injuries/et [Etiology]  
RP - NOT IN FILE  
SP - 49  
EP - 53  
JF - International Journal of Injury Control & Safety Promotion  
JA - Int.J Inj.Contr.Saf Promot  
VL - 14  
IS - 1  
CY - England  
N2 - Falls from publicly owned climbing equipment are often cited as the major cause of injury on children's outdoor playgrounds and have been the focus of substantial interventions in the UK since the early 1980s. Analysis of national data on falls from climbing frames for 1988 to 2002 shows that the main discernible trend during this period is an increase in the occurrence of injuries to the lower arm. Whether this is attributable to a behavioural response to some of the interventions, or to some other factor, is unknown

SN - 1745-7300

AD - Centre for Decision Analysis and Risk Management, School of Health and Social Sciences, Middlesex University, Queensway, Enfield, Middlesex, UK. D.Ball@mdx.ac.uk

UR - 17624011

ER -

TY - JOUR

ID - 302

T1 - Addressing the issue of falls off playground equipment: an empirically-based intervention to reduce fall-risk behaviors on playgrounds

A1 - Morrongiello,B.A.

A1 - Matheis,S.

Y1 - 2007/08//

N1 - Morrongiello, Barbara A. Matheis, Shawn

Journal of pediatric psychology

jl8, 7801773

IM

Journal Article. Research Support, Non-U.S. Gov't  
English

KW - Medline

KW - Accidental Falls/pc [Prevention & Control]

KW - Accidental Falls/sn [Statistics & Numerical Data]

KW - Child

KW - Child Behavior

KW - Empirical Research

KW - Female

KW - Humans

KW - Leisure Activities

KW - Male

KW - Play and Playthings

KW - Questionnaires

KW - Risk-Taking

KW - Safety

KW - Technology

KW - Wounds and Injuries/ep [Epidemiology]

KW - Wounds and Injuries/pc [Prevention & Control]

RP - NOT IN FILE

SP - 819

EP - 830

JF - Journal of Pediatric Psychology

JA - J Pediatr Psychol.

VL - 32

IS - 7

CY - United States

N2 - **OBJECTIVE:** The present study evaluated the impact of an intervention to reduce fall-risk behaviors on playgrounds among children 6-11 years of age. **METHODS:** Children completed posters indicating risky playground behaviors they would and would not do. In the intervention group, video and audio presentations were used to expose children to injury occurrences so that injury vulnerability was communicated in a fear-evoking way. In the control group, children only completed the pre- and post-intervention measures. **RESULTS:** Significant decreases in intentions to risk-take were obtained in the intervention, but not the control group. Effectiveness did not vary with children's age or sex, but was greater for those scoring high in sensation-seeking. **CONCLUSIONS:** A fear-appeals approach proved successful to reduce intended fall-risk behaviors, particularly for children high in sensation-seeking whose risk-taking is motivated by affect arousal

SN - 0146-8693

AD - Psychology Department, University of Guelph, Guelph, Ontario, N1G 2W1, Canada.

bmorrong@uoguelph.ca

UR - 17522112

ER -

TY - JOUR

ID - 303

T1 - Social and communication development in toddlers with early and later diagnosis of autism spectrum disorders

A1 - Landa,R.J.

A1 - Holman,K.C.

A1 - Garrett-Mayer,E.

Y1 - 2007/07//

N1 - Landa, Rebecca J. Holman, Katherine C. Garrett-Mayer, Elizabeth

Archives of general psychiatry

72c, 0372435

AIM, IM

Comparative Study. Journal Article. Research Support, N.I.H., Extramural

English

KW - Medline

KW - Age Factors

KW - Autistic Disorder/di [Diagnosis]

KW - Autistic Disorder/ge [Genetics]

KW - Autistic Disorder/px [Psychology]

KW - Child Development/ph [Physiology]

KW - Child

KW - Preschool

KW - Communication Disorders/di [Diagnosis]

KW - Communication Disorders/ge [Genetics]

KW - Communication Disorders/px [Psychology]

KW - Developmental Disabilities/di [Diagnosis]

KW - Developmental Disabilities/ge [Genetics]

KW - Developmental Disabilities/px [Psychology]

KW - Female

KW - Genetic Predisposition to Disease/ge [Genetics]

KW - Humans

KW - Infant

KW - Language Tests/sn [Statistics & Numerical Data]

KW - Longitudinal Studies

KW - Male

KW - Nonverbal Communication/ph [Physiology]

KW - Nonverbal Communication

KW - Personality Inventory/sn [Statistics & Numerical Data]

KW - Phenotype

KW - Play and Playthings/px [Psychology]

KW - Prospective Studies

KW - Psychiatric Status Rating Scales/sn [Statistics & Numerical Data]

KW - Risk Factors

KW - Siblings/px [Psychology]

KW - Social Behavior

KW - SOCIALIZATION

KW - Statistics

KW - Nonparametric

RP - NOT IN FILE

SP - 853

EP - 864

JF - Archives of General Psychiatry

JA - Arch.Gen.Psychiatry

VL - 64

IS - 7

CY - United States

N2 - CONTEXT: To our knowledge, no prospective studies of the developmental course of early and later diagnosis of autism spectrum disorders from 14 months of age exist. OBJECTIVE: To examine patterns of development from 14 to 24 months in children with early and later diagnosis of autism spectrum disorders. DESIGN: Prospective, longitudinal design in which 125 infants at high and low risk for autism were tested from age 14 to 36 months. Comprehensive standardized assessments included measures of social, communication, and play behavior. SETTING: Testing occurred at a major medical and research institution as part of a large, ongoing longitudinal study. PARTICIPANTS: Low-risk controls (n = 18) and siblings of children with autism, grouped on the basis of outcome diagnostic classification at 30 or 36 months: autism spectrum disorders (early diagnosis, n = 16; later diagnosis, n = 14), broader autism phenotype (n = 19), and non-broader autism phenotype (n = 58). MAIN OUTCOME MEASURES: Social, communication, and symbolic abilities were assessed. RESULTS: Social, communication, and play behavior in the early-diagnosis group differed from that in all other groups by 14 months of age. By 24 months, the later-diagnosis group differed from the non-autism spectrum disorder groups in social and communication behavior, but not from the early-diagnosis group. Examination of growth trajectories suggests that autism may involve developmental arrest, slowing, or even regression. CONCLUSION: This study provides insight into different patterns of development of children with early vs later diagnosis of autism spectrum disorders

SN - 0003-990X

AD - Kennedy Krieger Institute, Center for Autism and Related Disorders, The Johns Hopkins School of Medicine, Baltimore, Maryland 21211, USA

UR - 17606819

ER -

TY - JOUR

ID - 304

T1 - A meta-analysis of children's hand-to-mouth frequency data for estimating nondietary ingestion exposure

A1 - Xue,J.

A1 - Zartarian,V.

A1 - Moya,J.

A1 - Freeman,N.

A1 - Beamer,P.

A1 - Black,K.

A1 - Tolve,N.

A1 - Shalat,S.

Y1 - 2007/04//

N1 - Xue, Jianping. Zartarian, Valerie. Moya, Jacqueline. Freeman, Natalie. Beamer, Paloma. Black, Kathy. Tolve, Nicolle. Shalat, Stuart

Risk analysis : an official publication of the Society for Risk Analysis

8109978, ria

IM

Journal Article. Meta-Analysis. Research Support, U.S. Gov't, Non-P.H.S.

English

KW - Medline

KW - Age Factors

KW - Child

KW - Preschool

KW - Eating

KW - Environmental Exposure

KW - Environmental Monitoring

KW - Environmental Pollutants/to [Toxicity]

KW - Face

KW - Humans

KW - Infant

KW - Motor Activity



KW - Mouth  
KW - Play and Playthings  
KW - Risk Assessment  
KW - Sex Factors  
RP - NOT IN FILE  
SP - 411  
EP - 420  
JF - Risk Analysis  
JA - Risk Anal.  
VL - 27  
IS - 2  
CY - United States

N2 - Because of their mouthing behaviors, children have a higher potential for exposure to available chemicals through the nondietary ingestion route; thus, frequency of hand-to-mouth activity is an important variable for exposure assessments. Such data are limited and difficult to collect. Few published studies report such information, and the studies that have been conducted used different data collection approaches (e.g., videography versus real-time observation), data analysis and reporting methods, ages of children, locations, and even definitions of "mouthing." For this article, hand-to-mouth frequency data were gathered from 9 available studies representing 429 subjects and more than 2,000 hours of behavior observation. A meta-analysis was conducted to study differences in hand-to-mouth frequency based on study, age group, gender, and location (indoor vs. outdoor), to fit variability and uncertainty distributions that can be used in probabilistic exposure assessments, and to identify any data gaps. Results of this analysis indicate that age and location are important for hand-to-mouth frequency, but study and gender are not. As age increases, both indoor and outdoor hand-to-mouth frequencies decrease. Hand-to-mouth behavior is significantly greater indoors than outdoors. For both indoor and outdoor hand-to-mouth frequencies, interpersonal, and intra-personal variability are approximately 60% and approximately 30%, respectively. The variance difference among different studies is much bigger than its mean, indicating that different studies with different methodologies have similar central values. Weibull distributions best fit the observed data for the different variables considered and are presented in this article by study, age group, and location. Average indoor hand-to-mouth behavior ranged from 6.7 to 28.0 contacts/hour, with the lowest value corresponding to the 6 to <11 year olds and the highest value corresponding to the 3 to <6 month olds. Average outdoor hand-to-mouth frequency ranged from 2.9 to 14.5 contacts/hour, with the lowest value corresponding to the 6 to <11 year olds and the highest value corresponding to the 6 to <12 month olds. The analysis highlights the need for additional hand-to-mouth data for the <3 months, 3 to <6 months, and 3 to <6 year age groups using standardized collection and analysis because of lack of data or high uncertainty in available data. This is the first publication to report Weibull distributions as the best fitting distribution for hand-to-mouth frequency; using the best fitting exposure factor distribution will help improve estimates of exposure. The analyses also represent a first comprehensive effort to fit hand-to-mouth frequency variability and uncertainty distributions by indoor/outdoor location and by age groups, using the new standard set of age groups recommended by the U.S. Environmental Protection Agency for assessing childhood exposures. Thus, the data presented in this article can be used to update the U.S. EPA's Child-Specific Exposure Factors Handbook and to improve estimates of nondietary ingestion in probabilistic exposure modeling

SN - 0272-4332

AD - U.S. Environmental Protection Agency, Boston, MA, USA

UR - 17511707

ER -

TY - JOUR

ID - 305

T1 - Frequency of caregiver supervision of young children during play

A1 - Chen,X.

A1 - Beran,M.

A1 - Altkorn,R.

A1 - Milkovich,S.

A1 - Gruaz,K.

A1 - Rider,G.

A1 - Kanti,A.

A1 - Ochsenhirt,J.  
Y1 - 2007/06//  
N1 - Chen, Xiao. Beran, Melissa. Altkorn, Robert. Milkovich, Scott. Gruaz, Kristin. Rider, Gene. Kanti, Amita. Ochsenhirt, Jen  
International journal of injury control and safety promotion  
101247254  
IM  
Journal Article  
English  
KW - Medline  
KW - Caregivers  
KW - Child  
KW - Child Care/mt [Methods]  
KW - Preschool  
KW - Data Collection  
KW - Female  
KW - Humans  
KW - Male  
KW - Ohio  
KW - Play and Playthings  
KW - Safety  
RP - NOT IN FILE  
SP - 122  
EP - 124  
JF - International Journal of Injury Control & Safety Promotion  
JA - Int.J Inj.Contr.Saf Promot  
VL - 14  
IS - 2  
CY - England  
SN - 1745-7300  
AD - Intertek Risk Assessment and Management, Oak Brook, IL, USA. xiao.chen@intertek.com  
UR - 17510849  
ER -  
  
TY - JOUR  
ID - 306  
T1 - Survey of primary school educators regarding burn-risk behaviors and fire-safety education  
A1 - Dougherty,J.  
A1 - Pucci,P.  
A1 - Hemmila,M.R.  
A1 - Wahl,W.L.  
A1 - Wang,S.C.  
A1 - Arbabi,S.  
Y1 - 2007/06//  
N1 - Dougherty, Joseph. Pucci, Pamela. Hemmila, Mark R. Wahl, Wendy L. Wang, Stewart C. Arbabi, Saman  
Burns : journal of the International Society for Burn Injuries  
afc, 8913178  
IM  
Journal Article. Multicenter Study. Research Support, Non-U.S. Gov't  
English  
KW - Medline  
KW - Adolescent  
KW - Burns/et [Etiology]  
KW - Burns/pc [Prevention & Control]  
KW - Child  
KW - Preschool

KW - Faculty  
 KW - Fires/pc [Prevention & Control]  
 KW - Firesetting Behavior/et [Etiology]  
 KW - Health Education/st [Standards]  
 KW - Health Knowledge  
 KW - Attitudes  
 KW - Practice  
 KW - Humans  
 KW - Infant  
 KW - Perception  
 KW - Professional Competence/st [Standards]  
 KW - Risk Assessment  
 KW - Risk-Taking  
 KW - Safety Management/st [Standards]  
 KW - Schools  
 KW - Teaching/st [Standards]  
 RP - NOT IN FILE  
 SP - 472  
 EP - 476  
 JF - Burns  
 VL - 33  
 IS - 4  
 CY - England

N2 - **OBJECTIVE:** To assess primary school educator knowledge and opinions regarding fire-setting behaviors and burn-injury prevention education. **DESIGN AND SETTING:** A written survey, consisting of 24 questions, was distributed to 8 primary schools. The survey was designed by our burn center personnel to assess basic knowledge and opinions. It was distributed to teachers by the school principals and completed surveys were collected by our staff. **RESULTS:** Twenty percent of elementary school educators surveyed had experience teaching burned children (mean age: 7+/-3; range: 2-17); 8% had experience with children that were injured due to fire-play. Fire experimentation begins at 6.1+/-2 years of age (range: 2-13). Educators believe students can benefit from a fire prevention curriculum beginning at 7.3+/-1.8 years (range: 5-12). The average time requested for an elementary school burn-injury prevention program was 4+/-3h. Kindergarten teachers requested 8h and fifth grade teachers asked for 3.3h. Over 97% of elementary school teachers agree that discussions about the medical and social consequences of burns will reduce fire-play behavior in children. **CONCLUSIONS:** Nearly all primary school educators surveyed agreed that burn injuries and attempting to curb fire-play are important societal issues. There was wide agreement that including a description of the medical and social consequences of burns in a preventive curriculum would enhance its efficacy. The younger students are, the more time teachers require to adequately convey fire safety instruction

SN - 0305-4179

AD - The University of Michigan Health System Burn Center, Ann Arbor, MI, United States

UR - 17467910

ER -

TY - JOUR

ID - 307

T1 - Safe and healthy school environments. [Review] [72 refs]

A1 - Geller,R.J.

A1 - Rubin,I.L.

A1 - Nodvin,J.T.

A1 - Teague,W.G.

A1 - Frumkin,H.

Y1 - 2007/04/20/

N1 - Geller, Robert J. Rubin, I Leslie. Nodvin, Janice T. Teague, W Gerald. Frumkin, Howard

Pediatric clinics of North America

oum, 0401126

AIM, IM

Journal Article. Review

English

KW - Medline

KW - Child

KW - Child Welfare/sn [Statistics & Numerical Data]

KW - Child Welfare

KW - Crowding

KW - Emergency Medical Services

KW - Environmental Exposure/pc [Prevention & Control]

KW - Environmental Health/og [Organization & Administration]

KW - Food Services

KW - Health Planning

KW - Health Promotion

KW - Humans

KW - Humidity/ae [Adverse Effects]

KW - Interior Design and Furnishings

KW - Lighting/ae [Adverse Effects]

KW - Noise/ae [Adverse Effects]

KW - Pediatrics/og [Organization & Administration]

KW - Play and Playthings

KW - Safety Management/og [Organization & Administration]

KW - School Health Services/og [Organization & Administration]

KW - Temperature

KW - Transportation

KW - United States/ep [Epidemiology]

KW - Wounds and Injuries/pc [Prevention & Control]

RP - NOT IN FILE

SP - 351

EP - 373

JF - Pediatric Clinics of North America

JA - Pediatr Clin.North Am

VL - 54

IS - 2

CY - United States

N2 - Children spend much of their waking time at school. Many of the factors in the school environment can be improved with careful planning and allocation of resources. The pediatrician, as a child advocate, is in an excellent position to influence the allocation of school resources to improve the educational outcome. This article summarizes some of the current understanding gathered from applying an environmental health approach to the school setting and provides a basis for the interested physician and other child advocate to learn more and get involved. [References: 72]

SN - 0031-3955

AD - Emory Southeast Pediatric Environmental Health Specialty Unit, 49 Jesse Hill Jr Drive SE, Atlanta, GA 30303, USA. rgeller@georgiapoisoncenter.org

UR - 17448364

ER -

TY - JOUR

ID - 308

T1 - [Bedtime, television and computer habits of primary school children in Germany]. [German]

A1 - Heins,E.

A1 - Seitz,C.

A1 - Schuz,J.

A1 - Toschke,A.M.

A1 - Harth,K.

A1 - Letzel,S.

A1 - Bohler,E.

Y1 - 2007/03//

N1 - Heins, E. Seitz, C. Schuz, J. Toschke, A M. Harth, K. Letzel, S. Bohler, E

Gesundheitswesen (Bundesverband der Ärzte des Öffentlichen Gesundheitsdienstes (Germany))

bfd, 9204210

IM

English Abstract. Journal Article

German

KW - Medline

KW - Adolescent

KW - Child

KW - Computers/sn [Statistics & Numerical Data]

KW - Female

KW - Germany/ep [Epidemiology]

KW - Habits

KW - Humans

KW - Leisure Activities

KW - Male

KW - Play and Playthings

KW - Risk Assessment/mt [Methods]

KW - Risk Factors

KW - Schools/sn [Statistics & Numerical Data]

KW - Sleep Deprivation/ep [Epidemiology]

KW - Students/sn [Statistics & Numerical Data]

KW - Television/sn [Statistics & Numerical Data]

KW - Video Games

RP - NOT IN FILE

SP - 151

EP - 157

JF - Gesundheitswesen

VL - 69

IS - 3

CY - Germany

N2 - **BACKGROUND:** Pediatricians recommend daily sleep of at least ten hours for children aged 9 and 10 years. Sufficient sleep is necessary for maintaining the body's homeostasis, as well as for fixing memories and learning. Lack of sleep in children has been associated with a diminished school performance, reduced attention span, and obesity. Adulthood is influenced by childhood lifestyle habits. Data from 4th graders in 34 schools in Mainz and its surroundings were analysed in order to determine negative health lifestyle factors in German primary school children, such as lack of sleep and increased leisure time spent watching television and computer gaming. **METHODS:** Data from a cross-sectional study regarding cellular phone use in fourth-graders in Mainz were used for this analysis. Bedtime, television and computer use habits, as well as other factors were explored. A total of 1933 children from 34 schools participated by answering a questionnaire in the 2002-2003 school year (participation rate: 88%). Complete data for the secondary analysis were available from 1889 students (51% male, median age 10 years). **RESULTS:** Overall, 28% of the children reported going to bed after 9 pm on week nights, 16% reported watching television more than three hours daily, and 11% played computer or video games more than three hours daily. In the adjusted binary logistic regression model, being older, male, having older siblings, watching television (OR 1.82, 95% CI 1.28-2.61) and playing computer games (OR 3.23; 95% CI 2.24-4.67) for more than three hours daily, owning a mobile phone, and being in a school in the city were associated with going to bed after 9 pm. **CONCLUSION:** Every fourth child does not obtain a sleep duration of 10 hours, under the assumption that primary schoolchildren need to be awake at 7 am on weekdays. Lifestyle factors that may negatively influence a child's development determine their actual and future habits. Sufficient sleep and less television and computer leisure times should be assertively emphasized to parents and carers of primary school students, in order to prevent the negative consequences of lack of sleep, such as diminished school performance. Developing sex-specific prevention programs, which take into account the complex lifestyles and habits of primary schoolchildren, seems to be relevant

SN - 1439-4421

AD - Institut für Arbeits-, Sozial- und Umweltmedizin der Johannes Gutenberg-Universität Mainz, Mainz, Germany. heins@uni-mainz.de

UR - 17440845

ER -

TY - JOUR

ID - 309

T1 - Is work in education child's play? Understanding risks to educators arising from work organization and design of work spaces

A1 - Seifert,A.M.

Y1 - 2007///

N1 - Seifert, Ana Maria

New solutions : a journal of environmental and occupational health policy : NS

9100937

IM

Journal Article

English

KW - Medline

KW - Adult

KW - Burnout

KW - Professional/px [Psychology]

KW - Child

KW - Child Behavior Disorders

KW - Developmental Disabilities

KW - Education

KW - Special/ec [Economics]

KW - Special/ma [Manpower]

KW - Special/mt [Methods]

KW - Faculty/sd [Supply & Distribution]

KW - Faculty

KW - Female

KW - Human Engineering

KW - Humans

KW - Interprofessional Relations

KW - Interviews as Topic

KW - Job Satisfaction

KW - Middle Aged

KW - Occupational Health

KW - Organizational Culture

KW - Quebec

KW - Risk Factors

KW - Safety

KW - Schools/st [Standards]

KW - Urban Health

KW - Women's Health

KW - WOMEN

KW - Working

KW - Workplace/px [Psychology]

RP - NOT IN FILE

SP - 97

EP - 110

JF - New Solutions

JA - New solut.

VL - 17

IS - 1-2

CY - United States

N2 - The educational sector exposes its primarily female work force to numerous psychosocial risk factors. At the request of the education workers', ergonomists developed a participatory research project in order to understand the determinants of the difficulties experienced by special education technicians. These technicians work with students presenting behavioral and learning difficulties as well as developmental and mental health problems. Eighteen technicians were interviewed and the work of seven technicians and two teachers was observed. Technicians prevent and manage crisis situations and help students acquire social skills. Coordination with teachers is made difficult by the fact that most technicians work part time, part year, and many technicians' work areas and classrooms are physically distant one from another. Most technicians change schools each year and must continually reconstruct work teams. Management strategies and poorly adapted working spaces can have important repercussions on coordination among educators and on technicians' capacity to help students and prevent aggressive behavior

SN - 1048-2911

AD - CINBIOSE-UQAM, CP 8888 Succ Centre Ville Montreal H3C 3P8 Quebec, Canada. seifert.ana-maria@uqam.ca

UR - 17434862

ER -

TY - JOUR

ID - 310

T1 - Fractures in New Zealand elementary school settings

A1 - Rubie-Davies,C.M.

A1 - Townsend,M.A.

Y1 - 2007/01//

N1 - Rubie-Davies, Christine M. Townsend, Michael A R

The Journal of school health

k13, 0376370

IM, N

Journal Article

English

KW - Medline

KW - Child

KW - Equipment Design/st [Standards]

KW - Female

KW - Fractures

KW - Bone/ep [Epidemiology]

KW - Bone/et [Etiology]

KW - Humans

KW - Male

KW - New Zealand/ep [Epidemiology]

KW - Play and Playthings/in [Injuries]

KW - Safety/sn [Statistics & Numerical Data]

KW - School Health Services/sn [Statistics & Numerical Data]

KW - Schools/st [Standards]

RP - NOT IN FILE

SP - 36

EP - 40

JF - Journal of School Health

JA - J Sch Health

VL - 77

IS - 1

CY - United States

N2 - **BACKGROUND:** There is a need for greater international understanding of student safety in schools. This New Zealand study investigated the causes and school location of fractures sustained by students attending elementary school, with special emphasis on the types of fractures sustained following falls from playground equipment of various heights. **METHODS:** Over a 1-year period, 76 participating schools (with a combined roll of over 25,000 students) completed a questionnaire about the nature and circumstances of student fractures

sustained during regular school hours. RESULTS: Some 118 students sustained a total of 131 fractures. Injuries from playground equipment were no more frequent than those from general activities at school, and most were sustained in falls from heights less than 59 inches. Most fractures were to the upper limbs. Fractures were found to vary by gender and school size. CONCLUSIONS: The results are discussed in terms of the conditions and policies present in local schools, and the tension that exists in maintaining safety while offering appropriate challenges to students. Improvements in school safety may be more likely to result from a greater focus on the way that students interact at school, rather than on modifications to playground equipment

SN - 0022-4391

AD - Faculty of Education, The University of Auckland, Private Bag 92019, Auckland, New Zealand.

c.rubie@auckland.ac.nz

UR - 17212758

ER -

TY - JOUR

ID - 311

T1 - Television watching and frequency of family meals are predictive of overweight onset and persistence in a national sample of school-aged children

A1 - Gable,S.

A1 - Chang,Y.

A1 - Krull,J.L.

Y1 - 2007/01//

N1 - Gable, Sara. Chang, Yiting. Krull, Jennifer L

Journal of the American Dietetic Association

h6f, 7503061

AIM, IM

Journal Article. Research Support, U.S. Gov't, Non-P.H.S.

English

KW - Medline

KW - Body Mass Index

KW - Child

KW - Child Development

KW - Preschool

KW - Cohort Studies

KW - Confidence Intervals

KW - Eating

KW - Exercise/ph [Physiology]

KW - Female

KW - Humans

KW - Logistic Models

KW - Longitudinal Studies

KW - Male

KW - Multivariate Analysis

KW - Obesity/ep [Epidemiology]

KW - Obesity/et [Etiology]

KW - Odds Ratio

KW - Overweight

KW - Play and Playthings

KW - Predictive Value of Tests

KW - Risk Assessment

KW - Social Class

KW - Television

KW - Time Factors

KW - United States/ep [Epidemiology]

KW - Weight Gain/ph [Physiology]

RP - NOT IN FILE

SP - 53



EP - 61

JF - Journal of the American Dietetic Association

JA - J Am Diet Assoc.

VL - 107

IS - 1

CY - United States

**N2 - OBJECTIVE:** To identify eating and activity factors associated with school-aged children's onset of overweight and persistent overweight. **DESIGN:** Data were gathered at four time points between kindergarten entry and spring of third grade. Children were directly weighed and measured and categorized as not overweight (<95th percentile of body mass index) or overweight (> or =95th percentile body mass index); parents were interviewed by telephone or in person. **SUBJECTS/SETTING:** Subjects were participants in the Early Childhood Longitudinal Study-Kindergarten Cohort, a nationally representative sample of children who entered kindergarten during 1998-1999. Children who weighed <2,000 g at birth, received therapeutic services before kindergarten, skipped or repeated a grade, or without complete height and weight data were excluded, resulting in 8,459 participants. Children with intermittent overweight were not examined (n=459); analyses addressed 8,000 children. **MAIN OUTCOME MEASURES:** Three mutually exclusive groups of children were identified: never overweight, overweight onset, and persistent overweight. **STATISTICAL ANALYSES PERFORMED:** Multilevel, multivariate logistic regression analyses estimated the effects of eating and activity factors on the odds of overweight onset and persistent overweight above child sex, race, and family socioeconomic status. **RESULTS:** Children who watched more television (odds ratio [OR] 1.02) and ate fewer family meals (OR 1.08) were more likely to be overweight for the first time at spring semester of third grade. Children who watched more television (OR 1.03), ate fewer family meals (OR 1.08), and lived in neighborhoods perceived by parents as less safe for outdoor play (OR 1.32) were more likely to be persistently overweight. Child aerobic exercise and opportunities for activity were not associated with a greater likelihood of weight problems. **CONCLUSIONS:** This study supports theories regarding the contributions of television watching, family meals, and neighborhood safety to childhood weight status. When working with families to prevent and treat childhood weight problems, food and nutrition professionals should attend to children's time spent with screen media, the frequency of family mealtimes, and parents' perceptions of neighborhood safety for children's outdoor play

SN - 0002-8223

AD - Department of Psychological Sciences, University of Missouri, Columbia, MO 65211-7700, USA.  
gables@missouri.edu

UR - 17197271

ER -

TY - JOUR

ID - 312

T1 - BB guns--a dangerous toy

A1 - Chakravarty,D.

A1 - Chopra,S.

A1 - Jones,J.

Y1 - 2006/12//

N1 - Chakravarty, D. Chopra, S. Jones, J

Journal of the Royal Army Medical Corps

jv6, 7505627

IM

Case Reports. Journal Article

English

KW - Medline

KW - Accidents

KW - Home

KW - Child

KW - Child Behavior

KW - Finger Injuries/di [Diagnosis]

KW - Finger Injuries/et [Etiology]

KW - Firearms

KW - Hand Injuries/di [Diagnosis]

KW - Hand Injuries/et [Etiology]

KW - Humans

KW - Male

KW - Play and Playthings

KW - Safety

RP - NOT IN FILE

SP - 239

EP - 241

JF - Journal of the Royal Army Medical Corps

JA - J R Army Med Corps

VL - 152

IS - 4

CY - England

SN - 0035-8665

AD - Department of Orthopaedics, Peterborough Hospital, NHS Trust, Thorpe Road, Peterborough PE3 6DA.  
debasischakravarty@hotmail.com

UR - 17508645

ER -

TY - JOUR

ID - 313

T1 - Some reflections on infancy-onset trichotillomania

A1 - Keren,M.

A1 - Ron-Miara,A.

A1 - Feldman,R.

A1 - Tyano,S.

Y1 - 2006///

N1 - Keren, Miri. Ron-Miara, Adi. Feldman, Ruth. Tyano, Samuel

The Psychoanalytic study of the child

qdi, 0376472

IM

Case Reports. Journal Article

English

KW - Medline

KW - Child

KW - Preschool

KW - Communication

KW - Female

KW - Follow-Up Studies

KW - Humans

KW - Infant

KW - Life Change Events

KW - Maternal Behavior

KW - Mother-Child Relations

KW - Object Attachment

KW - Play and Playthings

KW - Psychoanalytic Theory

KW - Psychoanalytic Therapy

KW - Risk Factors

KW - Treatment Outcome

KW - Trichotillomania/px [Psychology]

KW - Trichotillomania/th [Therapy]

RP - NOT IN FILE

SP - 254

EP - 272

JF - Psychoanalytic Study of the Child

JA - Psychoanal.Study Child

VL - 61

CY - United States

N2 - Whether infancy-onset trichotillomania is best regarded as a habit, an early sign of obsessive compulsive disorder, a symptom of anxiety, or a sign of severe deprivation has been a topic of continuous debate. In this paper, we describe our clinical experience with nine consecutive cases of infancy-onset trichotillomania and detail the evaluation process and treatment course in one case. A distinct psychosocial stressor was identified in all cases, often accompanied by loss in the parents' histories. Most of the children had no transitional object. In six infants, the symptom resolved after treatment and did not recur, while in three others improvement was partial. Length of treatment varied from four to twenty-one sessions and outcome was unrelated to treatment duration. In all cases, mother-child interactions were characterized by a lack of maternal physical contact and warmth, sharp maternal transitions between under-involvement and intrusiveness, lack of mutual engagement, and no elaboration of symbolic play. The infant's behavior during play was marked by anxiety, irritability, and momentary withdrawal from the interaction. Our cases reveal an impaired affective interpersonal communication between mother and child, often masked by a fair overall family instrumental functioning. It is tentatively suggested that infancy-onset trichotillomania represents an end-point symptom of several factors, such as a disturbed parent-infant relationship, a low pain threshold in the infant, and a parental hypersensitivity to overt expressions of aggressive impulses and negative affects. Issues related to treatment modalities are also addressed. Discussion focused on our experience that early-onset cases of trichotillomania are often not benign or homogenous in terms of etiology, course, or response to treatment and require much further study

SN - 0079-7308

AD - Infant Mental Health Unit, Geha Mental Health Center, Petah Tiqva, Israel

UR - 17370463

ER -

TY - JOUR

ID - 314

T1 - Resilience among at-risk Hispanic American preschool children

A1 - Oades-Sese,G.V.

A1 - Esquivel,G.B.

Y1 - 2006/12//

N1 - Oades-Sese, Geraldine V. Esquivel, Giselle B

Annals of the New York Academy of Sciences

5nm, 7506858

IM

Journal Article

English

KW - Medline

KW - Adaptation

KW - Psychological

KW - Child

KW - Preschool

KW - Female

KW - Hispanic Americans/px [Psychology]

KW - Humans

KW - Male

KW - Multilingualism

KW - Risk Factors

KW - Social Adjustment

RP - NOT IN FILE

SP - 335

EP - 339

JF - Annals of the New York Academy of Sciences

JA - Ann.N.Y.Acad.Sci

VL - 1094

CY - United States

N2 - This study combines cognitive (i.e., intelligence), psychosocial (i.e., inhibition, activity level, negative emotionality, emotion regulation, autonomy), and cultural-linguistic factors (i.e., level of acculturation and bilingualism) to determine patterns of resilience and vulnerability among 207 economically disadvantaged Hispanic American preschool children, from 50 early childhood classrooms, as gauged by their social competence during peer play. Person-oriented analysis yielded six distinct profiles, two profiles of which were resilient and one identified as vulnerable. Results of this study revealed within-group differences in resilience among these children and the significant role bilingualism and maintenance of the home language play in their social-emotional development

SN - 0077-8923

AD - Graduate School of Education, Division of Psychological and Educational Services, Fordham University, New York, New York, USA. oadessese@fordham.edu

UR - 17347372

ER -

TY - JOUR

ID - 315

T1 - Toys and safety

A1 - Scowen,P.

Y1 - 2006//

N1 - Scowen, Pat

The journal of family health care

101142028

N

Journal Article

English

KW - Medline

KW - Child

KW - Preschool

KW - Great Britain

KW - Humans

KW - Infant

KW - Play and Playthings

KW - Safety/lj [Legislation & Jurisprudence]

KW - Safety

RP - NOT IN FILE

SP - 134

EP - 135

JF - Journal of Family Health Care

JA - J Fam.Health Care

VL - 16

IS - 5

CY - England

N2 - Christmas is coming and with it the purchase of toys for the children. But toys are also given all year round, and educating each new generation of parents about toy and play safety is part of the public health role for health professionals working with families

SN - 1474-9114

UR - 17139973

ER -

TY - JOUR

ID - 316

T1 - Children's indoor and outdoor play patterns in Ahwaz City: implications for injury prevention

A1 - Soori,H.

Y1 - 2006/05//

N1 - Soori, H

Eastern Mediterranean health journal = La revue de sante de la Mediterranee orientale = al-Majallah al-sihhiyah

li-sharq al-mutawassit

daq, 9608387

IM

Journal Article

English

KW - Medline

KW - Accident Prevention

KW - Age Factors

KW - Bicycling/in [Injuries]

KW - Bicycling/sn [Statistics & Numerical Data]

KW - Child

KW - Cross-Sectional Studies

KW - Female

KW - Humans

KW - Iran/ep [Epidemiology]

KW - Leisure Activities

KW - Male

KW - Needs Assessment/og [Organization & Administration]

KW - Parents/px [Psychology]

KW - Play and Playthings/in [Injuries]

KW - Public Facilities/sn [Statistics & Numerical Data]

KW - Questionnaires

KW - Risk Assessment

KW - Risk Factors

KW - Safety Management/og [Organization & Administration]

KW - Sex Factors

KW - Soccer/in [Injuries]

KW - Soccer/sn [Statistics & Numerical Data]

KW - Socioeconomic Factors

KW - Television/sn [Statistics & Numerical Data]

KW - Urban Population/sn [Statistics & Numerical Data]

KW - Wounds and Injuries/ep [Epidemiology]

KW - Wounds and Injuries/et [Etiology]

KW - Wounds and Injuries/pc [Prevention & Control]

RP - NOT IN FILE

SP - 372

EP - 381

JF - Eastern Mediterranean Health Journal

JA - East Mediterr.Health J

VL - 12

IS - 3-4

CY - Egypt

N2 - A cross-sectional study in Ahwaz city, Islamic Republic of Iran, described children's indoor and outdoor play patterns. A total of 952 pupils aged 7 and 9 years and 942 parents completed questionnaires. Children's favourite activities were: playing football (22.3%), cycling (13.2%) and watching television (12.3%). This differed from those perceived by the parents who reported watching television (20.3%), playing football (13.3%) and playing in street (11.4%). Children reported their favourite places to play were: street (27.4%), park/playground (18.3%) and home (17.8%). There were significant differences in play patterns by age and sex. The play patterns of older children and boys exposed them to more hazardous situations than younger children and girls

SN - 1020-3397

AD - Department of Epidemiology and Biostatistics, Faculty of Public Health, Shaheed Beheshti University of Medical Sciences, Tehran, Islamic Republic of Iran. hsoori@yahoo.com

UR - 17037706

ER -

TY - JOUR

ID - 317

T1 - Early identification of autism: how early can we go?. [Review] [127 refs]

A1 - Crais,E.R.

A1 - Watson,L.R.

A1 - Baranek,G.T.

A1 - Reznick,J.S.

Y1 - 2006/08//

N1 - Crais, Elizabeth R. Watson, Linda R. Baranek, Grace T. Reznick, J Steven

Seminars in speech and language

8405117, cfb, 8405117

IM

Journal Article. Review

English

KW - Medline

KW - Age Factors

KW - Autistic Disorder/di [Diagnosis]

KW - Autistic Disorder/ep [Epidemiology]

KW - Child

KW - Child Behavior

KW - Child Development

KW - Preschool

KW - Communication

KW - Early Intervention (Education)/sn [Statistics & Numerical Data]

KW - Humans

KW - Play and Playthings

KW - Risk Assessment

KW - Social Behavior

RP - NOT IN FILE

SP - 143

EP - 160

JF - Seminars in Speech & Language

JA - Semin Speech Lang

VL - 27

IS - 3

CY - United States

N2 - Identification of young children at risk for Autism Spectrum Disorders (ASD) depends on early behavioral symptomatology and yet conventional criteria provide little guidance for use with infants and toddlers. Recent research, however, has demonstrated that there are patterns of behavior below 2 years of age that distinguish children with autism from those who are developing typically or those with other developmental disabilities. Skill areas with particular promise for early identification include social communication, sensory regulation, and play. This article previews current innovative methodologies, presents a synthesis of recent research findings related to these three key areas, and provides clinicians with practical guidelines for early identification of infants and toddlers at risk for ASD and other disorders. [References: 127]

SN - 0734-0478

AD - Division of Speech and Hearing Sciences, University of North Carolina at Chapel Hill, Chapel Hill, North Carolina 27599, USA. bcrais@med.unc.edu

UR - 16941286

ER -

TY - JOUR

ID - 318

T1 - Bubbles to Wubbles: an investigation involving the contamination of soap bubble products at a pediatric hospital

A1 - Dolan,S.A.

A1 - Eberhart,T.

A1 - James,J.F.  
Y1 - 2006/07//  
N1 - Dolan, Susan A. Eberhart, Teresa. James, John F  
Journal for specialists in pediatric nursing : JSPN  
101142025  
IM, N  
Journal Article  
English  
KW - Medline  
KW - Air  
KW - Child  
KW - Clinical Nursing Research  
KW - Colony Count  
KW - Microbial  
KW - Colorado  
KW - Drug Contamination/pc [Prevention & Control]  
KW - Drug Contamination/sn [Statistics & Numerical Data]  
KW - Equipment Contamination/pc [Prevention & Control]  
KW - Equipment Contamination/sn [Statistics & Numerical Data]  
KW - Equipment Contamination  
KW - Hair Preparations/sd [Supply & Distribution]  
KW - Hair Preparations  
KW - Hospitals  
KW - Pediatric  
KW - Humans  
KW - Infection Control/mt [Methods]  
KW - Play and Playthings  
KW - Safety Management  
KW - Soaps/sd [Supply & Distribution]  
KW - Soaps  
KW - Solutions  
RP - NOT IN FILE  
SP - 189  
EP - 195  
JF - Journal for Specialists in Pediatric Nursing: JSPN  
JA - J Spec.Pediatr Nurs  
VL - 11  
IS - 3  
CY - United States  
SN - 1539-0136  
AD - Nurse Epidemiologist. dolan.susan@tchden.org  
UR - 16774529  
ER -  
  
TY - JOUR  
ID - 319  
T1 - Not all risk is bad, playgrounds as a learning environment for children  
A1 - Mitchell,R.  
A1 - Cavanagh,M.  
A1 - Eager,D.  
Y1 - 2006/06//  
N1 - Mitchell, Rebecca. Cavanagh, Margaret. Eager, David  
International journal of injury control and safety promotion  
101247254  
IM

Journal Article

English

KW - Medline

KW - Adolescent

KW - Child

KW - Child Behavior

KW - Child Development

KW - Preschool

KW - Hospitalization/sn [Statistics & Numerical Data]

KW - Humans

KW - Infant

KW - Learning

KW - New South Wales/ep [Epidemiology]

KW - Play and Playthings/in [Injuries]

KW - Play and Playthings/px [Psychology]

KW - Risk-Taking

KW - Wounds and Injuries/ep [Epidemiology]

RP - NOT IN FILE

SP - 122

EP - 124

JF - International Journal of Injury Control & Safety Promotion

JA - Int.J Inj.Contr.Saf Promot

VL - 13

IS - 2

CY - England

SN - 1745-7300

AD - NSW Injury Risk Management Research Centre, formerly, Injury Prevention and Policy Branch, NSW Health Department, Australia. r.mitchell@unsw.edu.au

UR - 16707350

ER -

TY - JOUR

ID - 320

T1 - Early language and communication development of infants later diagnosed with autism spectrum disorder

A1 - Mitchell,S.

A1 - Brian,J.

A1 - Zwaigenbaum,L.

A1 - Roberts,W.

A1 - Szatmari,P.

A1 - Smith,I.

A1 - Bryson,S.

Y1 - 2006/04//

N1 - Mitchell, Shelley. Brian, Jessica. Zwaigenbaum, Lonnie. Roberts, Wendy. Szatmari, Peter. Smith, Isabel. Bryson, Susan

Journal of developmental and behavioral pediatrics : JDBP

htf, 8006933

IM

Journal Article. Research Support, Non-U.S. Gov't

English

KW - Medline

KW - Autistic Disorder/di [Diagnosis]

KW - Autistic Disorder/px [Psychology]

KW - Child

KW - Preschool

KW - Communication

KW - Developmental Disabilities/et [Etiology]



KW - Developmental Disabilities/px [Psychology]

KW - Female

KW - Humans

KW - Infant

KW - Language

KW - Language Disorders/di [Diagnosis]

KW - Language Disorders/et [Etiology]

KW - Male

KW - Play and Playthings

KW - Siblings

KW - Social Behavior

RP - NOT IN FILE

SP - S69

EP - S78

JF - Journal of Developmental & Behavioral Pediatrics

JA - J Dev.Behav Pediatr

VL - 27

IS - 2 Suppl

CY - United States

N2 - It is well recognized that delayed "first words" is among the most common presenting symptoms of autistic spectrum disorders (ASD). However, data on earlier language and communication development in children with ASD are limited to retrospective reports from parents and from home videos. In this study, we prospectively collected parent report data on early communication and language development in 97 infant siblings of children with ASD and 49 low-risk controls. Parents completed the MacArthur Communicative Development Inventory--Infant Form at 12 and 18 months. Analysis compared 3 groups defined on the basis of diagnostic assessment at 24 months: (1) siblings with ASD (n = 15), (2) siblings not meeting diagnostic criteria for ASD (n = 82), and (3) low-risk controls, none of whom had ASD (n = 49). Children with ASD showed delays in early language and communication compared with non-ASD siblings and controls. At 12 months, the ASD group was reported to understand significantly fewer phrases and to produce fewer gestures. At 18 months, they showed delays in their understanding of phrases, comprehension and production of single words, and use of gestures. Siblings not diagnosed with ASD also used fewer play-related gestures at 18 months than low-risk controls, even when children with identified language delays were excluded. Overall, this prospective study confirms that delays in communication and language development are apparent early in life in children with ASD, and emphasizes that developmental surveillance should include monitoring for delays in gesture, which may be among the earliest signs of ASD

SN - 0196-206X

AD - Autism Research Unit, The Hospital for Sick Children, Toronto, Ontario, Canada

UR - 16685188

ER -

TY - JOUR

ID - 321

T1 - Estimation of daily bisphenol a intake of Japanese individuals with emphasis on uncertainty and variability

A1 - Miyamoto,K.

A1 - Kotake,M.

Y1 - 2006///

N1 - Miyamoto, Ken-ichi. Kotake, Mari

Environmental sciences : an international journal of environmental physiology and toxicology

9209787

IM

Journal Article. Research Support, Non-U.S. Gov't

English

KW - Medline

KW - Adolescent

KW - Adult

KW - Bottle Feeding

KW - Child  
 KW - Preschool  
 KW - Environmental Exposure/an [Analysis]  
 KW - Environmental Monitoring  
 KW - Environmental Pollutants/an [Analysis]  
 KW - Female  
 KW - Food Contamination  
 KW - Glucuronides/ur [Urine]  
 KW - Humans  
 KW - Infant  
 KW - Newborn  
 KW - Inhalation Exposure/an [Analysis]  
 KW - Male  
 KW - Monte Carlo Method  
 KW - Phenols/an [Analysis]  
 KW - Phenols/ur [Urine]  
 KW - Play and Playthings  
 KW - Risk Assessment  
 KW - Uncertainty  
 KW - Water Supply  
 RP - NOT IN FILE

SP - 15

EP - 29

JF - Environmental Sciences

JA - Environ.

VL - 13

IS - 1

CY - Japan

N2 - The purpose of this study was to comprehensively assess the exposure of Japanese individuals to bisphenol A (BPA) with emphasis on uncertainty and variability in available information. The uncertainty and variability in parameters were numerically analyzed using Monte Carlo simulation. The uncertainty in the functional relationship between sources and exposure was treated by comparing two approaches: one was to aggregate ingestion and inhalation through all possible exposure pathways and the other was to estimate the intake from urinary excretion by backward calculation. For individuals aged 6 months or above, food was the most significant source of intake. The alteration of the method used in inactivating the inside surface of drink cans slightly contributed to the decrease in daily intake. By the backward calculation approach based on urinary excretion, 95% confidence intervals for the daily intake for high-exposure populations were estimated to be 0.037-0.064 microg/kg/day for males and 0.043-0.075 microg/kg/day for females. Even conservatively estimated daily intakes were lower than the EU's temporary tolerable daily intake (TDI) of 10 microg/kg/day as well as the U.S. Environmental Protection Agency (US EPA)'s reference dose (RfD) of 50 microg/kg/day. Thus, it is unlikely that humans, including infants and young children, are at unacceptable risk from possible BPA exposure

SN - 0915-955X

AD - Research Center for Chemical Risk Management, National Institute of Advanced Industrial Science and Technology, Tsukuba, Ibaraki, Japan. ken-ichi.miyamoto@aist.go.jp

UR - 16685249

ER -

TY - JOUR

ID - 322

T1 - Does children's screen time predict requests for advertised products? Cross-sectional and prospective analyses

A1 - Chamberlain,L.J.

A1 - Wang,Y.

A1 - Robinson,T.N.

Y1 - 2006/04//

N1 - Chamberlain, Lisa J. Wang, Yun. Robinson, Thomas N

Archives of pediatrics & adolescent medicine

9422751, bwf

AIM, IM

Journal Article. Research Support, N.I.H., Extramural

English

KW - Medline

KW - Advertising as Topic/sn [Statistics & Numerical Data]

KW - Advertising as Topic

KW - Beverages

KW - California/ep [Epidemiology]

KW - Child

KW - Confounding Factors (Epidemiology)

KW - Cross-Sectional Studies

KW - Environmental Exposure

KW - Female

KW - Follow-Up Studies

KW - Food

KW - Humans

KW - Life Style

KW - Male

KW - Multivariate Analysis

KW - Play and Playthings

KW - Predictive Value of Tests

KW - Prospective Studies

KW - Risk Factors

KW - Self Disclosure

KW - Television/sn [Statistics & Numerical Data]

KW - Television

KW - Time Factors

RP - NOT IN FILE

SP - 363

EP - 368

JF - Archives of Pediatrics & Adolescent Medicine

JA - Arch.Pediatr Adolesc Med

VL - 160

IS - 4

CY - United States

N2 - **OBJECTIVE:** To examine children's screen media exposure and requests for advertised toys and food/drinks. **DESIGN:** Prospective cohort study. **SETTING:** Twelve elementary schools in northern California. **PARTICIPANTS:** Eight hundred twenty-seven third grade children participated at baseline; 386 students in 6 schools were followed up for 20 months. **INTERVENTION:** None. **MAIN OUTCOME MEASURES:** Child self-reported requests for advertised toys and foods/drinks. **RESULTS:** At baseline, children's screen media time was significantly associated with concurrent requests for advertised toys (Spearman  $r = 0.15$  [TV viewing] and  $r = 0.20$  [total screen time]; both  $P < .001$ ) and foods/drinks (Spearman  $r = 0.16$  [TV viewing] and  $r = 0.18$  [total screen time]; both  $P < .001$ ). In prospective analysis, children's screen media time at baseline was significantly associated with their mean number of toy requests 7 to 20 months later (Spearman  $r = 0.21$  [TV viewing] and  $r = 0.24$  [total screen time]; both  $P < .001$ ) and foods/drinks requests (Spearman  $r = 0.14$  [TV viewing] and  $r = 0.16$  [total screen time]; both  $P < .01$ ). After adjusting for baseline requests and sociodemographic variables, the relationship between screen media exposure and future requests for advertised foods/drinks remained significant for total TV viewing and total screen media exposure. The relationship with future requests for toys remained significant for total screen media exposure. **CONCLUSIONS:** Screen media exposure is a prospective risk factor for children's requests for advertised products. Future experimental studies on children's health- and consumer-related outcomes are warranted

SN - 1072-4710

AD - Division of General Pediatrics, Department of Pediatrics and Stanford Prevention Research Center, Stanford University School of Medicine, 750 Welch Road, Palo Alto, CA 94304, USA.  
lchamberlain@stanford.edu

UR - 16585480

ER -

TY - JOUR

ID - 323

T1 - A probabilistic arsenic exposure assessment for children who contact chromated copper arsenate (CCA)-treated playsets and decks, Part 2: Sensitivity and uncertainty analyses

A1 - Xue,J.

A1 - Zartarian,V.G.

A1 - Ozkaynak,H.

A1 - Dang,W.

A1 - Glen,G.

A1 - Smith,L.

A1 - Stallings,C.

Y1 - 2006/04//

N1 - Xue, Jianping. Zartarian, Valerie G. Ozkaynak, Haluk. Dang, Winston. Glen, Graham. Smith, Luther. Stallings, Casson

Risk analysis : an official publication of the Society for Risk Analysis

8109978, ria

IM

Journal Article

English

KW - Medline

KW - Arsenates/ae [Adverse Effects]

KW - Arsenic/ad [Administration & Dosage]

KW - Arsenic/ae [Adverse Effects]

KW - Child

KW - Environmental Exposure

KW - Housing

KW - Humans

KW - Models

KW - Statistical

KW - Monte Carlo Method

KW - Play and Playthings

KW - Risk Assessment/sn [Statistics & Numerical Data]

KW - Risk Assessment

KW - Sensitivity and Specificity

KW - Soil Pollutants/ae [Adverse Effects]

KW - Uncertainty

KW - United States

KW - United States Environmental Protection Agency

KW - Wood

RP - NOT IN FILE

SP - 533

EP - 541

JF - Risk Analysis

JA - Risk Anal.

VL - 26

IS - 2

CY - United States

N2 - A probabilistic model (SHEDS-Wood) was developed to examine children's exposure and dose to chromated copper arsenate (CCA)-treated wood, as described in Part 1 of this two-part article. This Part 2 article discusses sensitivity and uncertainty analyses conducted to assess the key model inputs and areas of needed

research for children's exposure to CCA-treated playsets and decks. The following types of analyses were conducted: (1) sensitivity analyses using a percentile scaling approach and multiple stepwise regression; and (2) uncertainty analyses using the bootstrap and two-stage Monte Carlo techniques. The five most important variables, based on both sensitivity and uncertainty analyses, were: wood surface residue-to-skin transfer efficiency; wood surface residue levels; fraction of hand surface area mouthed per mouthing event; average fraction of nonresidential outdoor time a child plays on/around CCA-treated public playsets; and frequency of hand washing. In general, there was a factor of 8 for the 5th and 95th percentiles and a factor of 4 for the 50th percentile in the uncertainty of predicted population dose estimates due to parameter uncertainty. Data were available for most of the key model inputs identified with sensitivity and uncertainty analyses; however, there were few or no data for some key inputs. To evaluate and improve the accuracy of model results, future measurement studies should obtain longitudinal time-activity diary information on children, spatial and temporal measurements of residue and soil concentrations on or near CCA-treated playsets and decks, and key exposure factors. Future studies should also address other sources of uncertainty in addition to parameter uncertainty, such as scenario and model uncertainty

SN - 0272-4332

AD - U.S. Environmental Protection Agency, Office of Research and Development, National Exposure Research Laboratory, Research Triangle Park, NC, USA

UR - 16573638

ER -

TY - JOUR

ID - 324

T1 - The Stamp-in-Safety program: a behavioral intervention to reduce behaviors that can lead to unintentional playground injury in a preschool setting

A1 - Schwebel,D.C.

A1 - Summerlin,A.L.

A1 - Bounds,M.L.

A1 - Morrongiello,B.A.

Y1 - 2006/03//

N1 - Schwebel, David C. Summerlin, Adam L. Bounds, Marjorie L. Morrongiello, Barbara A

Journal of pediatric psychology

j18, 7801773

IM

Clinical Trial. Journal Article

English

KW - Medline

KW - Adult

KW - Alabama

KW - Analysis of Variance

KW - Behavior Control/mt [Methods]

KW - Child Day Care Centers

KW - Child

KW - Preschool

KW - Female

KW - Humans

KW - Male

KW - Play and Playthings/in [Injuries]

KW - Play and Playthings

KW - Token Economy

KW - Wounds and Injuries/pc [Prevention & Control]

RP - NOT IN FILE

SP - 152

EP - 162

JF - Journal of Pediatric Psychology

JA - J Pediatr Psychol.

VL - 31

IS - 2

CY - United States

N2 - OBJECTIVE: To introduce and evaluate the Stamp-in-Safety program, a behavioral intervention designed to increase the quality of supervision by teachers on preschool playgrounds and to reduce the risk of unintentional child playground injury. METHODS: A quasi-experimental time series design was used, with observational techniques, to evaluate behavior on the playground before, during, and after the intervention as well as during a 6-month post-intervention assessment. RESULTS: Both applied behavior analysis techniques and inferential statistics suggest that the Stamp-in-Safety program resulted in behavioral changes likely to reduce the risk of child injury on the playgrounds of childcare centers. CONCLUSION: Results indicate promise for the Stamp-in-Safety program as a low-cost, easily implemented intervention to reduce pediatric playground injury risk at childcare centers. Suggestions for future research are offered

SN - 0146-8693

AD - Department of Psychology, University of Alabama at Birmingham, 1300 University Boulevard, CH 415, Birmingham, Alabama 35294, USA. schwebel@uab.edu

UR - 16467315

ER -

TY - JOUR

ID - 325

T1 - Smoking among secondary school students in Negeri Sembilan, Malaysia

A1 - Lee,L.K.

A1 - Paul,C.Y.

A1 - Kam,C.W.

A1 - Jagmohni,K.

Y1 - 2005///

N1 - Lee, L K. Paul, C Y C. Kam, C W. Jagmohni, K

Asia-Pacific journal of public health / Asia-Pacific Academic Consortium for Public Health  
asj, 8708538

IM

Journal Article

English

KW - Medline

KW - Adolescent

KW - Adult

KW - Child

KW - Cross-Sectional Studies

KW - Female

KW - Humans

KW - Malaysia/ep [Epidemiology]

KW - Male

KW - Questionnaires

KW - Schools

KW - Smoking/ep [Epidemiology]

RP - NOT IN FILE

SP - 130

EP - 136

JF - Asia-Pacific Journal of Public Health

JA - Asia Pac.J Public Health

VL - 17

IS - 2

CY - China

N2 - This study was done to determine the prevalence of smoking and factors influencing cigarette smoking among secondary school students in Negeri Sembilan, Malaysia. This is a cross-sectional school survey conducted on 4500 adolescent students based on a structured questionnaire. Data was collected using the supervised self-administered questionnaire the Youth Risk Behaviour Surveillance in the Malaysian National Language Bahasa Malaysia. The prevalence of smoking among the students was 14.0%. About a third of the

students (37.8%) started smoking at 13 to 14 years of age. The prevalence of smoking among the male students was higher (26.6%) compared to the female students (3.1%). Adolescent smoking was associated with (1) sociodemographic factors (age, ethnicity, rural/urban status); (2) environmental factors (parental smoking, staying with parents); (3) behavioural factors (playing truant and risk-taking behaviours such as physical fighting, drug use, alcohol use, sexual activity, lack of seatbelt use, riding with a drunk driver); (4) lifestyle behaviours (being on diet and lack of exercise); (5) personal factors (feeling sad and suicidal behaviours). In conclusion, smoking is a major problem among Malaysian adolescents. Certain groups of adolescents tend to be at higher risk of smoking. This problem should be curbed early by targeting these groups of high risk adolescents

SN - 1010-5395

AD - Department of Community Medicine, International Medical University, Sesama Centre, Plaza Komanwel, Bukit Jalil, 57000 Kuala Lumpur, Malaysia

UR - 16425658

ER -

TY - JOUR

ID - 326

T1 - Playground safety in South Western Sydney

A1 - Martin,J.

A1 - Cooper,C.D.

Y1 - 2005/11//

N1 - Martin, J. Cooper, C D

Journal of paediatrics and child health

arp, 9005421

IM

Journal Article. Research Support, Non-U.S. Gov't

English

KW - Medline

KW - Accident Prevention

KW - Accidental Falls/pc [Prevention & Control]

KW - Child

KW - Data Collection

KW - Equipment Design/st [Standards]

KW - Guideline Adherence

KW - Humans

KW - New South Wales

KW - Play and Playthings

KW - Safety

RP - NOT IN FILE

SP - 587

EP - 591

JF - Journal of Paediatrics & Child Health

JA - J Paediatr Child Health

VL - 41

IS - 11

CY - Australia

N2 - OBJECTIVE: Recognition of the cost of injuries sustained in playgrounds has led to the development of Australian/New Zealand Standards for playground safety. This study assesses compliance of public playgrounds in South Western Sydney with the current Standards. METHODS: Playgrounds in South Western Sydney were randomly audited for compliance with Australian/New Zealand Standards for playground equipment pertaining to fall height, type of undersurface material, adequacy of maintenance of undersurface materials and adequacy of the safe fall zone. Comparisons were made with an audit of playgrounds in New South Wales undertaken in 1995 by Kidsafe. RESULTS: Of the 257 pieces of equipment from 87 playgrounds audited, only three (3.4%) playgrounds and 65 (25.3%) pieces of equipment complied with all criteria assessed. Compared with the 1995 study, there has been a significant improvement in equipment complying with height standards (84.4% vs 72.2%,  $P < 0.0001$ ) and appropriate undersurface material (66.8% vs 45.4%,  $P < 0.0001$ ). Pinebark is now the

most common appropriate undersurface material used but is poorly maintained, particularly in high-traffic areas. Of 131 pieces of equipment with an appropriate undersurface material, only 38 (29%) had an adequate safe fall zone. CONCLUSIONS: Improvements in playground safety have occurred; however, very few playgrounds meet the Australian/New Zealand Standards. Compliance with Standards pertaining to maintenance of undersurface materials and safe fall zone is poor. Mechanisms need to be developed to support councils in the upgrading and maintenance of existing playgrounds

SN - 1034-4810

AD - The Children's Hospital at Westmead, New South Wales, Australia. janem3@chw.edu.au

UR - 16398844

ER -

TY - JOUR

ID - 327

T1 - Teaching safety skills to children to prevent gun play: an evaluation of in situ training

A1 - Miltenberger,R.G.

A1 - Gatheridge,B.J.

A1 - Satterlund,M.

A1 - Egemo-Helm,K.R.

A1 - Johnson,B.M.

A1 - Jostad,C.

A1 - Kelso,P.

A1 - Flessner,C.A.

Y1 - 2005///

N1 - Miltenberger, Raymond G. Gatheridge, Brian J. Satterlund, Melisa. Egemo-Helm, Kristin R. Johnson, Brigitte M. Jostad, Candice. Kelso, Pamela. Flessner, Christopher A

Journal of applied behavior analysis

0174763, hdr

IM

Evaluation Studies. Journal Article

English

KW - Medline

KW - Child

KW - Preschool

KW - Female

KW - Firearms

KW - Humans

KW - Male

KW - Play and Playthings

KW - Safety

KW - Teaching/mt [Methods]

KW - Wounds

KW - Gunshot/pc [Prevention & Control]

RP - NOT IN FILE

SP - 395

EP - 398

JF - Journal of Applied Behavior Analysis

JA - J Appl.Behav Anal.

VL - 38

IS - 3

CY - United States

N2 - This study evaluated behavioral skills training with added in situ training for teaching safety skills to prevent gun play. Following baseline, each child received two sessions of behavioral skills training and one in situ training session. Additional in situ training sessions were conducted until the child exhibited the safety skills (don't touch the gun, get away, and tell an adult). All children acquired and maintained the safety skills at a 3-month follow-up. In addition, of the 7 children assessed in a dyad situation, all exhibited the correct skills in the presence of another child



SN - 0021-8855

AD - Department of Psychology, North Dakota State University, Fargo, North Dakota 58105, USA.  
ray.miltenberger@ndsu.edu

UR - 16270848

ER -

TY - JOUR

ID - 328

T1 - Assessing peer entry and play in preschoolers at risk for maladjustment

A1 - Brotman,L.M.

A1 - Gouley,K.K.

A1 - Chesir-Teran,D.

Y1 - 2005/12//

N1 - Brotman, Laurie Miller. Gouley, Kathleen Kiely. Chesir-Teran, Daniel

Journal of clinical child and adolescent psychology : the official journal for the Society of Clinical Child and Adolescent Psychology, American Psychological Association, Division 53

101133858

IM

Journal Article. Validation Studies

English

KW - Medline

KW - Child Behavior Disorders/di [Diagnosis]

KW - Child

KW - Preschool

KW - Female

KW - Humans

KW - Male

KW - Observer Variation

KW - Peer Group

KW - Play and Playthings

KW - Psychiatric Status Rating Scales

KW - Psychometrics

KW - Risk Factors

RP - NOT IN FILE

SP - 671

EP - 680

JF - Journal of Clinical Child & Adolescent Psychology

JA - J Clin.Child Adolesc Psychol.

VL - 34

IS - 4

CY - United States

N2 - This study evaluated the psychometric properties of an observational rating system for assessing preschoolers' peer entry and play skills: Observed Peer Play in Unfamiliar Settings (OPPUS). Participants were 84 preschoolers at risk for psychopathology. Reliability and concurrent validity are reported. The 30-min paradigm yielded reliable indexes of engaging and disruptive behavior. Adequate interrater reliability and stability were obtained with minimally trained observers. OPPUS scores were related in expected ways to independent observations of disruptive and engaging behavior during parent-child interactions. OPPUS scores were associated with parent-rated self-control and internalizing behaviors. OPPUS scores were associated with parent ratings of play skills for children with school experience and assertiveness for children without school experience. The OPPUS is a useful, brief method for assessing peer entry and play behaviors in preschoolers

SN - 1537-4416

AD - NYU Child Study Center, New York University School of Medicine, NY 10016, USA.

laurie.brotman@med.nyu.edu

UR - 16232064

ER -

TY - JOUR

ID - 329

T1 - [MusicPlayTherapy--a parent-child psychotherapy for children 0-4 years old]. [German]

A1 - Stumptner,K.

A1 - Thomsen,C.

Y1 - 2005/10//

N1 - Stumptner, Katrin. Thomsen, Cornelia

Praxis der Kinderpsychologie und Kinderpsychiatrie

pj6, 0404246

IM

English Abstract. Journal Article

German

KW - Medline

KW - Child

KW - Preschool

KW - Family Therapy/mt [Methods]

KW - Female

KW - Humans

KW - Infant

KW - Male

KW - Music Therapy/mt [Methods]

KW - Parent-Child Relations

KW - Personality Development

KW - Play Therapy/mt [Methods]

KW - Psychotherapeutic Processes

RP - NOT IN FILE

SP - 684

EP - 699

JF - Praxis der Kinderpsychologie und Kinderpsychiatrie

JA - Prax.Kinderpsychol.Kinderpsychiatr.

VL - 54

IS - 8

CY - Germany

N2 - The early stage of building up the parent-child relationship is especially important. It is the basis for the child's development of the ability to relate to others and his or her further emotional, social and cognitive development. In this important early phase various risk factors may alienate parents from their intuitive parental competence towards their children. Such interaction problems indicate an intervention in the form of parent-children psychotherapy. This constitutes an entry point for the concept of MusicPlayTherapy (MPT): The early relationship is characterized mainly by complex communication sequences that address the senses at all levels. Therefore, the MPT concept integrates music as medium to communicate and opens up a playing space for play that allows emotions and experiences to be expressed. The components of music such as rhythm, sound, and melody stimulate babies and toddlers to express, play, and communicate preverbally. We work with the child and a parent in the MusicPlayTherapy sessions. Parents learn again to play and thereby learn to reach their children emotionally and to communicate with them. We complement the therapy sessions by counselling sessions with both parents

SN - 0032-7034

AD - Institut fur Musik und Psychotherapie, Berlin. katrin.stumptner@t-online.de

UR - 16231598

ER -

TY - JOUR

ID - 330

T1 - Use of cigarettes and alcohol by preschoolers while role-playing as adults: "Honey, have some smokes"

A1 - Dalton,M.A.

A1 - Bernhardt,A.M.

A1 - Gibson,J.J.

A1 - Sargent,J.D.

A1 - Beach,M.L.

A1 - chi-Mejia,A.M.

A1 - Titus-Ernstoff,L.T.

A1 - Heatherton,T.F.

Y1 - 2005/09//

N1 - Dalton, Madeline A. Bernhardt, Amy M. Gibson, Jennifer J. Sargent, James D. Beach, Michael L. Adachi-Mejia, Anna M. Titus-Ernstoff, Linda T. Heatherton, Todd F

Archives of pediatrics & adolescent medicine

9422751, bwf

AIM, IM

Journal Article. Research Support, Non-U.S. Gov't

English

KW - Medline

KW - Adult

KW - Age Factors

KW - Alcohol Drinking/px [Psychology]

KW - Attitude to Health

KW - Child

KW - Child Behavior/px [Psychology]

KW - Preschool

KW - Female

KW - Humans

KW - Learning

KW - Male

KW - New Hampshire

KW - Parents/px [Psychology]

KW - Play and Playthings

KW - Questionnaires

KW - Risk-Taking

KW - Role Playing

KW - Smoking/px [Psychology]

KW - Social Conformity

KW - Social Environment

KW - Social Perception

RP - NOT IN FILE

SP - 854

EP - 859

JF - Archives of Pediatrics & Adolescent Medicine

JA - Arch.Pediatr Adolesc Med

VL - 159

IS - 9

CY - United States

N2 - OBJECTIVE: To examine preschoolers' attitudes, expectations, and perceptions of tobacco and alcohol use. DESIGN: Structured observational study. Children used props and dolls to act out a social evening for adults. As part of the role play, each child selected items from a miniature grocery store stocked with 73 different products, including beer, wine, and cigarettes, for an evening with friends. SETTING: A behavioral laboratory at the Department of Psychological and Brain Sciences, Dartmouth College. PATIENTS: One hundred twenty children, 2 to 6 years old, participated individually in the role-playing. MAIN OUTCOME MEASURE: Whether or not a child purchased cigarettes or alcohol at the store. RESULTS: Children purchased a mean of 17 of the 73 products in the store. Thirty-four children (28.3%) bought cigarettes and 74 (61.7%) bought alcohol. Children were more likely to buy cigarettes if their parents smoked (adjusted odds ratio [OR], 3.90; 95% confidence interval [CI], 1.20-12.63). Children were more likely to buy beer or wine if their parents drank alcohol at least monthly (adjusted OR, 3.04; 95% CI, 1.02-9.10) or if they viewed PG-13- or R-rated movies (adjusted OR, 5.10; 95% CI, 1.14-22.90). Children's play behavior suggests that they are highly attentive to the use and enjoyment of alcohol and tobacco and have well-established expectations about how cigarettes

and alcohol fit into social settings. CONCLUSIONS: The data suggest that observation of adult behavior, especially parental behavior, may influence preschool children to view smoking and drinking as appropriate or normative in social situations. These perceptions may relate to behaviors adopted later in life

SN - 1072-4710

AD - Department of Pediatrics, Dartmouth Medical School, Norris Cotton Cancer Center, Lebanon, NH 03756, USA. Madeline.Dalton@Dartmouth.edu

UR - 16143745

ER -

TY - JOUR

ID - 332

T1 - The effect of safer play equipment on playground injury rates among school children

A1 - Howard,A.W.

A1 - Macarthur,C.

A1 - Willan,A.

A1 - Rothman,L.

A1 - Moses-McKeag,A.

A1 - Macpherson,A.K.

Y1 - 2005/05/24/

N1 - Howard, Andrew W. MacArthur, Colin. Willan, Andrew. Rothman, Linda. Moses-McKeag, Alexandra. MacPherson, Alison K

CMAJ : Canadian Medical Association journal = journal de l'Association medicale canadienne  
9711805

AIM, IM

Evaluation Studies. Journal Article

English

KW - Medline

KW - Accident Prevention

KW - Child

KW - Equipment Design

KW - Guideline Adherence

KW - Humans

KW - Ontario

KW - Play and Playthings

KW - Risk Assessment

KW - Safety

KW - Schools

KW - Wounds and Injuries/pc [Prevention & Control]

RP - NOT IN FILE

SP - 1443

EP - 1446

JF - CMAJ Canadian Medical Association Journal

JA - CMAJ

VL - 172

IS - 11

CY - Canada

N2 - BACKGROUND: Changes to Canadian Standards Association (CSA) standards for playground equipment prompted the removal of hazardous equipment from 136 elementary schools in Toronto. We conducted a study to determine whether applying these new standards and replacing unsafe playground equipment with safe equipment reduced the number of school playground injuries. METHODS: A total of 86 of the 136 schools with hazardous play equipment had the equipment removed and replaced with safer equipment within the study period (intervention schools). Playground injury rates before and after equipment replacement were compared in intervention schools. A database of incident reports from the Ontario School Board Insurance Exchange was used to identify injury events. There were 225 schools whose equipment did not require replacement (nonintervention schools); these schools served as a natural control group for background injury rates during the study period. Injury rates per 1000 students per month, relative risks (RRs) and 95% confidence

intervals (CIs) were calculated, adjusting for clustering within schools. RESULTS: The rate of injury in intervention schools decreased from 2.61 (95% CI 1.93-3.29) per 1000 students per month before unsafe equipment was removed to 1.68 (95% CI 1.31-2.05) after it was replaced (RR 0.70, 95% CI 0.62-0.78). This translated into 550 injuries avoided in the post-intervention period. In nonintervention schools, the rate of injury increased from 1.44 (95% CI 1.07-1.81) to 1.81 (95% CI 1.07-2.53) during the study period (RR 1.40, 95% CI 1.29-1.52). INTERPRETATION: The CSA standards were an effective tool in identifying hazardous playground equipment. Removing and replacing unsafe equipment is an effective strategy for preventing playground injuries

SN - 1488-2329

AD - Department of Population Health Sciences, The Hospital for Sick Children, Toronto, Ont

UR - 15911858

ER -

TY - JOUR

ID - 333

T1 - Danger in the toy box

A1 - Stephenson,M.

Y1 - 2005/05//

N1 - Stephenson, Miranda

Journal of pediatric health care : official publication of National Association of Pediatric Nurse Associates & Practitioners

jml, 8709735

N

Journal Article

English

KW - Medline

KW - Accident Prevention

KW - Accidents

KW - Home/pc [Prevention & Control]

KW - Home/sn [Statistics & Numerical Data]

KW - Child

KW - Child Welfare

KW - Choice Behavior

KW - Consumer Product Safety

KW - Health Education/mt [Methods]

KW - Humans

KW - Nurse Practitioners

KW - Nurse's Role

KW - Parents/ed [Education]

KW - Parents/px [Psychology]

KW - Pediatric Nursing/mt [Methods]

KW - Play and Playthings/in [Injuries]

KW - Safety Management/mt [Methods]

KW - United States/ep [Epidemiology]

RP - NOT IN FILE

SP - 187

EP - 189

JF - Journal of Pediatric Health Care

JA - J Pediatr Health Care

VL - 19

IS - 3

CY - United States

SN - 0891-5245

AD - Emergency Department, Children's Medical Center Dallas, Dallas, Texas, USA

UR - 15867837

ER -

TY - JOUR  
ID - 334  
T1 - Child safety. Mary Ucci: getting the playground ready for spring  
Y1 - 2005/04//  
N1 - Child health alert  
9881972  
K  
Journal Article  
English  
KW - Medline  
KW - Child  
KW - Humans  
KW - Play and Playthings  
KW - Safety Management  
KW - Seasons  
RP - NOT IN FILE  
SP - 5  
EP - 6  
JF - Child Health Alert  
VL - 23  
CY - United States  
SN - 1064-4849  
UR - 15822212  
ER -

TY - JOUR  
ID - 335  
T1 - The in situ performance of playground surfacing: implications for maintenance and injury prevention  
A1 - Sherker,S.  
A1 - Short,A.  
A1 - Ozanne-Smith,J.  
Y1 - 2005/03//  
N1 - Sherker, Shauna. Short, Andrew. Ozanne-Smith, Joan  
International journal of injury control and safety promotion  
101247254  
IM  
Journal Article  
English  
KW - Medline  
KW - Australia  
KW - Child  
KW - Craniocerebral Trauma/pc [Prevention & Control]  
KW - Deceleration  
KW - Humans  
KW - Maintenance  
KW - Materials Testing  
KW - Play and Playthings  
KW - Safety/st [Standards]  
KW - Surface Properties  
KW - Time Factors  
KW - Wood  
RP - NOT IN FILE  
SP - 63  
EP - 66  
JF - International Journal of Injury Control & Safety Promotion

JA - Int.J Inj.Contr.Saf Promot

VL - 12

IS - 1

CY - Netherlands

SN - 1745-7300

AD - Accident Research Centre, Monash University, Victoria, Australia. Shauna.Sherker@UNSW.edu.au

UR - 15814379

ER -

TY - JOUR

ID - 336

T1 - Keeping all children healthy: challenges to leading an active lifestyle for preschool children qualifying for at-risk programs

A1 - Goodway,J.D.

A1 - Smith,D.W.

Y1 - 2005/04//

N1 - Goodway, Jacqueline D. Smith, Dennis W

Family & community health

ese, 7809641

IM

Journal Article

English

KW - Medline

KW - African Americans

KW - Child Welfare

KW - Child

KW - Preschool

KW - Environment

KW - Female

KW - Humans

KW - Life Style

KW - Male

KW - Motor Activity

KW - Play and Playthings

KW - Poverty

KW - Residence Characteristics

KW - Urban Population

RP - NOT IN FILE

SP - 142

EP - 155

JF - Family & Community Health

JA - Fam.Community Health

VL - 28

IS - 2

CY - United States

N2 - This study examined contextual factors associated with physical activity of urban African American preschoolers (N = 59). Qualitative research methodologies utilized data from home visits, caregiver and child interviews, field notes, and document collection. The primary finding suggested, "In underserved communities fundamental barriers exist that obstruct young children's ability to be physically active." Four themes were developed revealing that outside environments limited opportunities for physical activity, home environments resulted in sedentary behaviors, and communities had limited physical activity role models. Despite this, young children enjoyed being physically active

SN - 0160-6379

AD - School of Physical Activity and Educational Services, The Ohio State University, 303 Pomerene Hall, 1760 Neil Avenue, Columbus, OH 43026, USA. goodway-shiebler.1@osu.edu

UR - 15778628

ER -

TY - JOUR

ID - 337

T1 - Are current playground safety standards adequate for preventing arm fractures?

A1 - Goulding,A.

A1 - Grant,A.M.

A1 - Davidson,P.L.

Y1 - 2005/01/03/

N1 - Goulding, Ailsa. Grant, Andrea M. Davidson, Peter L

The Medical journal of Australia

0400714, m26

IM

Comment. Letter

English

KW - Medline

KW - Arm Injuries/ep [Epidemiology]

KW - Arm Injuries/pc [Prevention & Control]

KW - Australia/ep [Epidemiology]

KW - Body Mass Index

KW - Child

KW - Female

KW - Fractures

KW - Bone/ep [Epidemiology]

KW - Bone/pc [Prevention & Control]

KW - Guidelines as Topic

KW - Humans

KW - Male

KW - Obesity/ep [Epidemiology]

KW - Play and Playthings/in [Injuries]

KW - Risk Factors

KW - Safety/st [Standards]

RP - NOT IN FILE

SP - 46

EP - 47

JF - Medical Journal of Australia

JA - Med J Aust

VL - 182

IS - 1

CY - Australia

SN - 0025-729X

UR - 15651954

ER -

TY - JOUR

ID - 338

T1 - Randomized controlled trial of a family problem-solving intervention

A1 - Drummond,J.

A1 - Fleming,D.

A1 - McDonald,L.

A1 - Kysela,G.M.

Y1 - 2005/02//

N1 - Drummond, Jane. Fleming, Darcy. McDonald, Linda. Kysela, Gerard M

Clinical nursing research

9208508, bnz

N



Clinical Trial. Journal Article. Randomized Controlled Trial

English

KW - Medline

KW - Adaptation

KW - Psychological

KW - Adult

KW - Attitude to Health

KW - Child

KW - Preschool

KW - Conflict (Psychology)

KW - Cooperative Behavior

KW - Cross-Over Studies

KW - Cues

KW - Developmental Disabilities/pc [Prevention & Control]

KW - Developmental Disabilities/px [Psychology]

KW - Developmental Disabilities

KW - Family/px [Psychology]

KW - Family Therapy/og [Organization & Administration]

KW - Female

KW - Health Knowledge

KW - Attitudes

KW - Practice

KW - Humans

KW - Male

KW - Middle Aged

KW - Parent-Child Relations

KW - Play and Playthings/px [Psychology]

KW - Problem Solving

KW - Program Evaluation

KW - Self Efficacy

KW - Social Support

KW - Stress

KW - Psychological/et [Etiology]

KW - Psychological/pc [Prevention & Control]

KW - Psychological/px [Psychology]

KW - Videotape Recording

RP - NOT IN FILE

SP - 57

EP - 80

JF - Clinical Nursing Research

JA - Clin.Nurs Res.

VL - 14

IS - 1

CY - United States

N2 - Adaptive problem solving contributes to individual and family health and development. In this article, the effect of the cooperative family learning approach (CFLA) on group family problem solving and on cooperative parenting communication is described. A pretest or posttest experimental design was used. Participant families were recruited from Head Start programs and exhibited two or more risk factors. Participant preschool children were screened to have two or more developmental delays. Direct behavioral observation measures were used to determine group family problem solving and cooperative parenting communication outcomes. Few group family problem-solving behaviors were coded, and they displayed little variability. However, intervention parents increased the length of time they played and extended the cooperative parent-child interactions. The evidence shows that CFLA has the potential to enhance parental-modeling of cooperative behavior while engaged in play activities with preschoolers. Direct measurement of group family problem solving was difficult. Solutions are suggested

SN - 1054-7738

AD - University of Alberta, Edmonton, Canada  
UR - 15604228  
ER -

TY - JOUR

ID - 339

T1 - [Epidemiology of eye injuries in Abidjanian children]. [French]

A1 - Mensah,A.

A1 - Fany,A.

A1 - Adjorlolo,C.

A1 - Toure,M.L.

A1 - Kasieu,Gbe M.

A1 - Mihluedo,K.A.

A1 - Diallo,A.J.

A1 - Coulibaly,F.

A1 - Berete,R.

Y1 - 2004/10//

N1 - Mensah, Adama. Fany, Adama. Adjorlolo, Christiane. Toure, Marie-Louise. Kasieu Gbe, Maxime. Mihluedo, K A. Diallo, A J W. Coulibaly, F. Berete, R  
Sante (Montrouge, France)

b1i, 9212437

IM

Comparative Study. English Abstract. Journal Article

French

KW - Medline

KW - Adolescent

KW - Age Factors

KW - Blindness/et [Etiology]

KW - Child

KW - Preschool

KW - Contusions/co [Complications]

KW - Cote d'Ivoire/ep [Epidemiology]

KW - Eye Burns/co [Complications]

KW - Eye Burns/ep [Epidemiology]

KW - Eye Burns/th [Therapy]

KW - Eye Foreign Bodies/co [Complications]

KW - Eye Foreign Bodies/ep [Epidemiology]

KW - Eye Foreign Bodies/th [Therapy]

KW - Eye Injuries/co [Complications]

KW - Eye Injuries/ep [Epidemiology]

KW - Eye Injuries/et [Etiology]

KW - Eye Injuries/th [Therapy]

KW - Eye Injuries

KW - Penetrating/co [Complications]

KW - Penetrating/ep [Epidemiology]

KW - Penetrating/th [Therapy]

KW - Female

KW - Hospitalization

KW - Humans

KW - Infant

KW - Newborn

KW - Male

KW - Primary Health Care

KW - Prospective Studies

KW - Retinal Detachment/et [Etiology]

KW - Sex Factors

KW - Visual Acuity

RP - NOT IN FILE

SP - 239

EP - 243

JF - Sante

VL - 14

IS - 4

CY - France

N2 - Eye injuries, most of them preventable, are particularly severe in Africa, because of the risks of infection and delay in treatment. We report a 16-month (March 1997-June 1998) prospective observational survey of eye injuries in children up to the age of 15 years at Treichville-Abidjan University Hospital. During this period, 62 children were treated for these injuries. Ocular traumas represented 4% (n = 245) of new admissions in ophthalmology, and 29% of these injuries occurred in children. The sex ratio was 5:2 boys to girls, and their mean age was 8.66 +/- 3.56 years. Eye injuries occurred most often during play (84%, n = 52). More than 85% (n = 53) of children were alone or without adult supervision at the time of the injury. The causal agent was most often wood (35%) followed by metal (29%). The mean time from injury to hospital admission was 1.8 +/- 0.77 day. Only 19% of patients were admitted the day of injury. Most patients (66%) first sought treatment in a primary care centre. More than 70% (n = 44) of injuries necessitated hospitalisation. Open eyeball wounds were the most common injury (53%) and were associated with endophthalmitis in 16%. The mean recovery of visual acuity was 0.1. At admission, 40 of the injured eyes (64.5%) had monocular blindness; six recovered, for a final blindness rate of 55%. Injuries associated with wooden objects had a final blindness rate of 77% and play-related injuries 63%. The primary posttraumatic sequelae were corneal scars. Eyeball phthisis (14.5%) was secondary to 8 open wounds of the eyeball and one postcontusion retinal detachment. Eye injuries remain a major cause of monocular blindness in children in Cote d'Ivoire. Most of them can be prevented by relatively simple measures including supervision of children and rapid hospitalisation when injury occurs

SN - 1157-5999

AD - Centre hospitalier universitaire de Treichville, 01 BP V3 Abidjan 01 Cote d'Ivoire

UR - 15745874

ER -

TY - JOUR

ID - 340

T1 - Rearing behavior and rearing stress of fathers with children of preschool and school age

A1 - Lee, J.H.

A1 - Kim, H.Y.

A1 - Park, Y.A.

Y1 - 2004/12//

N1 - Lee, Ja-Hyung. Kim, Hye-Young. Park, Young-Ae

Taehan Kanho Hakhoe chi

101191388

IM, N

Comparative Study. Journal Article

English

KW - Medline

KW - Adolescent

KW - Adult

KW - Age Factors

KW - Analysis of Variance

KW - Child

KW - Child Rearing/eh [Ethnology]

KW - Child Rearing/px [Psychology]

KW - Preschool

KW - Father-Child Relations/eh [Ethnology]

KW - Fathers/ed [Education]

KW - Fathers/px [Psychology]

KW - Gender Identity

KW - Health Services Needs and Demand  
 KW - Health Surveys  
 KW - Humans  
 KW - Korea/ep [Epidemiology]  
 KW - Middle Aged  
 KW - Nursing Methodology Research  
 KW - Paternal Behavior/eh [Ethnology]  
 KW - Play and Playthings  
 KW - Questionnaires  
 KW - Risk Factors  
 KW - Severity of Illness Index  
 KW - Social Support  
 KW - Stress  
 KW - Psychological/eh [Ethnology]  
 KW - Psychological/pc [Prevention & Control]  
 KW - Psychological/px [Psychology]  
 RP - NOT IN FILE  
 SP - 1491  
 EP - 1498  
 JF - Daehan Ganho Haghoeji  
 JA - Taehan Kanho.Hakhoe.Chi  
 VL - 34  
 IS - 8

CY - Korea (South)

N2 - **PURPOSE:** This study was conducted to compare the paternal rearing behavior and rearing stress level between fathers with a preschooler and fathers with school children so that it can be utilized as a basic source for developing parental rearing education programs. **METHODS:** A descriptive comparative method was conducted to identify the paternal rearing behavior and paternal rearing stress. Respondents were 361 fathers who had either preschoolers (n=189) or children of elementary age (n=172). **RESULTS:** Comparing the two group's means, the rearing activity score and rearing stress there were significant differences. In the school children's group's father, 'outdoor activity' and 'guidance on discipline activity' were significantly higher than the other group. In the preschool children's fathers group, 'play interaction activity' was statistically significant higher than the other, and the child-part mean score of paternal rearing stress was significantly higher than the other group. The correlation between paternal rearing behavior and paternal rearing stress, indicates that more paternal rearing behavior means less paternal rearing stress. **CONCLUSION:** These results of this study will help design more effective rearing programs for fathers that have either preschool children or school children by providing the basic data for paternal rearing behaviors and paternal rearing stress

SN - 1598-2874

AD - College of Nursing Science, Ewha Womans University, Seoul 120-750, Korea. jahlee@ewha.ac.kr

UR - 15687792

ER -

TY - JOUR

ID - 341

T1 - Which factors may play a pivotal role on determining the type of psychiatric disorder in children and adolescents with epilepsy?

A1 - Thome-Souza,S.

A1 - Kuczynski,E.

A1 - Assumpcao,F.,Jr.

A1 - Rzezak,P.

A1 - Fuentes,D.

A1 - Fiore,L.

A1 - Valente,K.D.

Y1 - 2004/12//

N1 - Thome-Souza, Sigride. Kuczynski, Evelyn. Assumpcao, Francisco Jr. Rzezak, Patricia. Fuentes, Daniel. Fiore, Lia. Valente, Kette D

Epilepsy &amp; behavior : E&amp;B

100892858

IM

Comparative Study. Journal Article

English

KW - Medline

KW - Adolescent

KW - Age Factors

KW - Chi-Square Distribution

KW - Child

KW - Preschool

KW - Demography

KW - Diagnosis

KW - Differential

KW - Electroencephalography/mt [Methods]

KW - Epilepsy/cl [Classification]

KW - Epilepsy/co [Complications]

KW - Epilepsy/di [Diagnosis]

KW - Family

KW - Female

KW - Humans

KW - Magnetic Resonance Imaging/mt [Methods]

KW - Male

KW - Mental Disorders/cl [Classification]

KW - Mental Disorders/di [Diagnosis]

KW - Mental Disorders/ep [Epidemiology]

KW - Mental Disorders/et [Etiology]

KW - Neuropsychological Tests

KW - Psychiatric Status Rating Scales

KW - Risk Factors

KW - Sex Factors

KW - Statistics

KW - Nonparametric

RP - NOT IN FILE

SP - 988

EP - 994

JF - Epilepsy &amp; Behavior

JA - Epilepsy Behav

VL - 5

IS - 6

CY - United States

N2 - Physicians have become aware of the high prevalence of psychiatric disorders (PDs) in children and adolescents with epilepsy; however, there are many controversies as to which factors may have an important role in the different types of PD. This study was designed to assess the main PD; verify the age of onset compared with the age of diagnosis of the PD; and determine which factors may be correlated with the type of PD described. For this purpose, a multidisciplinary team evaluated children and adolescents (4-18 years) with epilepsy and analyzed patient-related factors such as age (grouped according to Piaget's cognitive scale: <6 years, 7-13 years, >13 years), sex, family history of PDs, and cognitive status. With respect to epilepsy features, we considered age of onset, duration, seizure control at the time of psychiatric evaluation, refractoriness, antiepileptic drugs (mono- vs polytherapy), seizure type (generalized vs focal), and epilepsy type (idiopathic vs symptomatic/probably symptomatic). Depression occurred in 36.4% and attention-deficit hyperactivity disorder (ADHD) in 29.1%, these being the most frequent PDs in this series. Focal epilepsy was significantly more frequent in children and adolescents with PDs. As to the type of PD, age was an important factor, with a predominance of ADHD in children and depression in adolescents ( $P < 0.0001$ ). Family history was contributory for depression, but not for others PDs ( $P < 0.0001$ ). Depression remained underdiagnosed and untreated for a longer period. Impact of early diagnosis and treatment remains unknown

SN - 1525-5050

AD - Laboratory of Clinical Neurophysiology, Institute and Department of Psychiatry, Clinic's Hospital  
University of Sao Paulo Medical School, Sao Paulo, Brazil

UR - 15582849

ER -

TY - JOUR

ID - 342

T1 - Hazards in our environment: the continuing problem of lead in toys...and pressure-treated playground  
equipment may not pose a risk

Y1 - 2004/11//

N1 - Child health alert

9881972

K

Journal Article

English

KW - Medline

KW - Arsenic/an [Analysis]

KW - Child

KW - Environmental Exposure/an [Analysis]

KW - Humans

KW - Lead Poisoning/et [Etiology]

KW - Play and Playthings

RP - NOT IN FILE

SP - 4

EP - 5

JF - Child Health Alert

VL - 22

CY - United States

SN - 1064-4849

UR - 15612096

ER -

TY - JOUR

ID - 343

T1 - Relation between increased numbers of safe playing areas and decreased vehicle related child mortality  
rates in Japan from 1970 to 1985: a trend analysis

A1 - Nakahara,S.

A1 - Nakamura,Y.

A1 - Ichikawa,M.

A1 - Wakai,S.

Y1 - 2004/12//

N1 - Nakahara, Shinji. Nakamura, Yasuhide. Ichikawa, Masao. Wakai, Susumu

Journal of epidemiology and community health

i1p, 7909766

IM

Journal Article

English

KW - Medline

KW - Accidents

KW - Traffic/mo [Mortality]

KW - Traffic/pc [Prevention & Control]

KW - Adolescent

KW - Child

KW - Child Mortality/td [Trends]

KW - Preschool

KW - Environment Design

KW - Humans

KW - Infant

KW - Newborn

KW - Japan/ep [Epidemiology]

KW - Play and Playthings

KW - Regression Analysis

KW - Safety/sn [Statistics & Numerical Data]

RP - NOT IN FILE

SP - 976

EP - 981

JF - Journal of Epidemiology & Community Health

JA - J Epidemiol.Community Health

VL - 58

IS - 12

CY - England

N2 - **OBJECTIVES:** To examine vehicle related mortality trends of children in Japan; and to investigate how environmental modifications such as the installation of public parks and pavements are associated with these trends. **DESIGN:** Poisson regression was used for trend analysis, and multiple regression modelling was used to investigate the associations between trends in environmental modifications and trends in motor vehicle related child mortality rates. **SETTING:** Mortality data of Japan from 1970 to 1994, defined as E-code 810-23 from 1970 to 1978 and E810-25 from 1979 to 1994, were obtained from vital statistics. Multiple regression modelling was confined to the 1970-1985 data. Data concerning public parks and other facilities were obtained from the Ministry of Land, Infrastructure, and Transport. **SUBJECTS:** Children aged 0-14 years old were examined in this study and divided into two groups: 0-4 and 5-14 years. **MAIN RESULTS:** An increased number of public parks was associated with decreased vehicle related mortality rates among children aged 0-4 years, but not among children aged 5-14. In contrast, there was no association between trends in pavements and mortality rates. **CONCLUSIONS:** An increased number of public parks might reduce vehicle related preschooler deaths, in particular those involving pedestrians. Safe play areas in residential areas might reduce the risk of vehicle related child death by lessening the journey both to and from such areas as well as reducing the number of children playing on the street. However, such measures might not be effective in reducing the vehicle related mortalities of school age children who have an expanded range of activities and walk longer distances

SN - 0143-005X

AD - Department of International Community Health, Graduate School of Medicine, The University of Tokyo, 7-3-1 Hongo, Bunkyo-ku, Tokyo 113-0033, Japan. shinji@m.u-tokyo.ac.jp

UR - 15547055

ER -

TY - JOUR

ID - 344

T1 - Utilization of juvenile animal studies to determine the human effects and risks of environmental toxicants during postnatal developmental stages. [Review] [130 refs]

A1 - Brent,R.L.

Y1 - 2004/10//

N1 - Brent, Robert L

Birth defects research. Part B, Developmental and reproductive toxicology

101155115

IM

Journal Article. Review

English

KW - Medline

KW - Adolescent

KW - Adult

KW - Animals

KW - Newborn

KW - Child

KW - Child Development/de [Drug Effects]  
 KW - Child Development/re [Radiation Effects]  
 KW - Preschool  
 KW - Environmental Exposure  
 KW - Humans  
 KW - Infant  
 KW - Intellectual Disability/et [Etiology]  
 KW - Models  
 KW - Animal  
 KW - Neoplasms/et [Etiology]  
 KW - Radiation  
 KW - Ionizing  
 KW - Risk Assessment  
 KW - Teratogens/pd [Pharmacology]  
 KW - Teratogens/to [Toxicity]  
 RP - NOT IN FILE  
 SP - 303  
 EP - 320  
 JF - Birth Defects Research  
 JA - Birth Defects Res.Part B Dev.Reprod.Toxicol.  
 VL - Part B, Developmental and Reproductive Toxicology. 71  
 IS - 5  
 CY - United States

**N2 - BACKGROUND:** Toxicology studies utilizing animals and in vitro cellular or tissue preparations have been used to study the toxic effects and mechanism of action of drugs and chemicals and to determine the effective and safe dose of drugs in humans and the risk of toxicity from chemical exposures. Testing in animals could be improved if animal dosing using the mg/kg basis was abandoned and drugs and chemicals were administered to compare the effects of pharmacokinetically and toxicokinetically equivalent serum levels in the animal model and human. Because alert physicians or epidemiology studies, not animal studies, have discovered most human teratogens and toxicities in children, animal studies play a minor role in discovering teratogens and agents that are deleterious to infants and children. In vitro studies play even a less important role, although they are helpful in describing the cellular or tissue effects of the drugs or chemicals and their mechanism of action. One cannot determine the magnitude of human risks from in vitro studies when they are the only source of toxicology data. **METHODS:** Toxicology studies on adult animals is carried out by pharmaceutical companies, chemical companies, the Food and Drug Administration (FDA), many laboratories at the National Institutes of Health, and scientific investigators in laboratories throughout the world. Although there is a vast amount of animal toxicology studies carried out on pregnant animals and adult animals, there is a paucity of animal studies utilizing newborn, infant, and juvenile animals. This deficiency is compounded by the fact that there are very few toxicology studies carried out in children. That is one reason why pregnant women and children are referred to as "therapeutic orphans." **RESULTS:** When animal studies are carried out with newborn and developing animals, the results demonstrate that generalizations are less applicable and less predictable than the toxicology studies in pregnant animals. Although many studies show that infants and developing animals may have difficulty in metabolizing drugs and are more vulnerable to the toxic effects of environmental chemicals, there are exceptions that indicate that infants and developing animals may be less vulnerable and more resilient to some drugs and chemicals. In other words, the generalization indicating that developing animals are always more sensitive to environmental toxicants is not valid. For animal toxicology studies to be useful, animal studies have to utilize modern concepts of pharmacokinetics and toxicokinetics, as well as "mechanism of action" (MOA) studies to determine whether animal data can be utilized for determining human risk. One example is the inability to determine carcinogenic risks in humans for some drugs and chemicals that produce tumors in rodents, When the oncogenesis is the result of peroxisome proliferation, a reaction that is of diminished importance in humans. **CONCLUSIONS:** Scientists can utilize animal studies to study the toxicokinetic and toxicodynamic aspects of drugs and environmental toxicants. But they have to be carried out with the most modern techniques and interpreted with the highest level of scholarship and objectivity. Threshold exposures, no-adverse-effect level (NOAEL) exposures, and toxic effects can be determined in animals, but have to be interpreted with caution when applying them to the human. Adult problems in growth, endocrine dysfunction, neurobehavioral abnormalities, and oncogenesis may be related to exposures to drugs, chemicals, and physical



agents during development and may be fruitful areas for investigation. Maximum permissible exposures have to be based on data, not on generalizations that are applied to all drugs and chemicals. Epidemiology studies are still the best methodology for determining the human risk and the effects of environmental toxicants. Carrying out these focused studies in developing humans will be difficult. Animal studies may be our only alternative for answering many questions with regard to specific postnatal developmental vulnerabilities. 2004 Wiley-Liss, Inc. [References: 130]

SN - 1542-9733

AD - Thomas Jefferson University, Alfred I. duPont Hospital for Children, Laboratory of Clinical and Environmental Teratology, Wilmington, Delaware 19899, USA. rbrent@nemours.org

UR - 15505806

ER -

TY - JOUR

ID - 345

T1 - Testing the prenatal hormone hypothesis of tic-related disorders: gender identity and gender role behavior

A1 - Alexander,G.M.

A1 - Peterson,B.S.

Y1 - 2004///

N1 - Alexander, Gerianne M. Peterson, Bradley S

Development and psychopathology

cn7, 8910645

IM

Comparative Study. Journal Article. Research Support, Non-U.S. Gov't. Research Support, U.S. Gov't, P.H.S.

English

KW - Medline

KW - Adolescent

KW - Adult

KW - Androgens/ph [Physiology]

KW - Brain/pp [Physiopathology]

KW - Child

KW - Female

KW - Gender Identity

KW - Humans

KW - Male

KW - Neuropsychological Tests

KW - Obsessive-Compulsive Disorder/di [Diagnosis]

KW - Obsessive-Compulsive Disorder/pp [Physiopathology]

KW - Personality Assessment

KW - Pregnancy

KW - Prenatal Exposure Delayed Effects

KW - Risk Factors

KW - Sex Differentiation/ph [Physiology]

KW - Social Behavior

KW - Tourette Syndrome/di [Diagnosis]

KW - Tourette Syndrome/pp [Physiopathology]

RP - NOT IN FILE

SP - 407

EP - 420

JF - Development & Psychopathology

JA - Dev.Psychopathol.

VL - 16

IS - 2

CY - United States

N2 - The hypothesis that prenatal masculinization of the brain increases risk of tic disorders in postnatal life was tested by measuring gender and gender role behavior in 89 children and adults with a clinical diagnosis of Tourette syndrome or obsessive compulsive disorder and 67 healthy, unaffected children and adults. Consistent

with this hypothesis, a tic disorder in females was associated with more gender dysphoria, increased masculine play preferences, and a more typically "masculine" pattern of performance on two sex-typed spatial tasks. Males with tic disorders reported increased masculine play preferences, and the strength of these preferences was positively associated with the severity of tic symptoms. In addition, unlike their female counterparts, males with tic disorders showed a relative impairment in mental rotation ability. These behavioral profiles are consistent with those of children who have verifiable elevations in prenatal androgen levels. These findings therefore support the hypothesis that an altered androgen-dependent process of sexual differentiation during prenatal life may contribute to the development of tic-related disorders

SN - 0954-5794

AD - Texas A&M University, Department of Psychology, College Station, 77843, USA. gma@psyc.tamu.edu

UR - 15487603

ER -

TY - JOUR

ID - 346

T1 - Infant joint attention skill and preschool behavioral outcomes in at-risk children

A1 - Sheinkopf,S.J.

A1 - Mundy,P.

A1 - Claussen,A.H.

A1 - Willoughby,J.

Y1 - 2004///

N1 - Sheinkopf, Stephen J. Mundy, Peter. Claussen, Angelika H. Willoughby, Jennifer Development and psychopathology

cn7, 8910645

IM

Journal Article. Research Support, Non-U.S. Gov't. Research Support, U.S. Gov't, P.H.S.

English

KW - Medline

KW - Attention/de [Drug Effects]

KW - Attention Deficit and Disruptive Behavior Disorders/ci [Chemically Induced]

KW - Attention Deficit and Disruptive Behavior Disorders/di [Diagnosis]

KW - Attention Deficit and Disruptive Behavior Disorders/px [Psychology]

KW - Child Behavior Disorders/ci [Chemically Induced]

KW - Child Behavior Disorders/di [Diagnosis]

KW - Child Behavior Disorders/px [Psychology]

KW - Child

KW - Preschool

KW - Cocaine/to [Toxicity]

KW - Female

KW - Humans

KW - Infant

KW - Newborn

KW - Intelligence/de [Drug Effects]

KW - Language Development Disorders/ci [Chemically Induced]

KW - Language Development Disorders/di [Diagnosis]

KW - Language Development Disorders/px [Psychology]

KW - Male

KW - Mother-Child Relations

KW - Nonverbal Communication

KW - Peer Group

KW - Personality Assessment

KW - Play and Playthings/px [Psychology]

KW - Pregnancy

KW - Prenatal Exposure Delayed Effects

KW - Risk Factors

KW - Social Behavior

KW - Social Isolation

RP - NOT IN FILE

SP - 273

EP - 291

JF - Development & Psychopathology

JA - Dev.Psychopathol.

VL - 16

IS - 2

CY - United States

N2 - This study examined whether infant joint attention (JA) skills predicted social behaviors in a sample of at-risk preschool children (n = 30) with a history of prenatal exposure to cocaine. JA behaviors were assessed with the Early Social and Communication Scales at 12, 15, and 18 months of age. Three classes of JA were measured: Initiating JA (IJA), Responding to JA (RJA), and Requests. Behavioral outcomes were measured at 36 months and included ratings of disruptive and withdrawn behaviors and social competence. JA behaviors were related to behavioral outcomes after controlling for language and cognitive ability. The functionally distinct uses of JA were differentially related to behavioral outcome. IJA negatively predicted disruptive behaviors, whereas Requests positively predicted disruptive behaviors. Infant RJA negatively predicted withdrawn behaviors and positively predicted social competence. These results are interpreted in the context of competing theories that attempt to explain variability in the expression of JA skills in the second year of life

SN - 0954-5794

AD - E P Bradley Hospital, Brown Medical School, East Providence, RI 02915, USA.

Stephen\_Sheinkopf@brown.edu

UR - 15487596

ER -

TY - JOUR

ID - 347

T1 - Comparison of two programs to teach firearm injury prevention skills to 6- and 7-year-old children

A1 - Gatheridge,B.J.

A1 - Miltenberger,R.G.

A1 - Huneke,D.F.

A1 - Satterlund,M.J.

A1 - Mattern,A.R.

A1 - Johnson,B.M.

A1 - Flessner,C.A.

Y1 - 2004/09//

N1 - Gatheridge, Brian J. Miltenberger, Raymond G. Huneke, Daniel F. Satterlund, Melisa J. Mattern, Amanda R. Johnson, Brigitte M. Flessner, Christopher A

Pediatrics

oxv, 0376422

AIM, IM

Clinical Trial. Comparative Study. Journal Article. Randomized Controlled Trial

English

KW - Medline

KW - Child

KW - Child Behavior

KW - Female

KW - Firearms

KW - Humans

KW - Male

KW - Play and Playthings

KW - Role Playing

KW - Safety

KW - Teaching/mt [Methods]

KW - Wounds

KW - Gunshot/pc [Prevention & Control]

RP - NOT IN FILE

SP - e294

EP - e299

JA - Pediatrics

VL - 114

IS - 3

CY - United States

N2 - **BACKGROUND:** Each year, hundreds of children unintentionally kill or injure other children while playing with firearms in the United States. Although the numbers of these deaths and injuries are distressing, few prevention programs have been developed to prevent gun play among children. **OBJECTIVE:** This study compared the efficacy of 2 programs designed to prevent gun play among young children. **DESIGN:** A posttest-only, control group design with 2 treatment groups was used. Children were randomly assigned to 1 of 2 treatment groups or a control group. For all children who did not exhibit the skills after training, 1 in situ (ie, real-life situation) training session was conducted. **SETTING:** Participant recruitment, training sessions, and assessments were all conducted in the children's after-school program facility. **PARTICIPANTS:** Forty-five children, 6 or 7 years of age, were recruited for participation. **INTERVENTIONS:** The efficacy of the Eddie Eagle GunSafe Program, developed by the National Rifle Association, and a behavioral skills training program that emphasized the use of instruction, modeling, rehearsal, and feedback was evaluated. **MAIN OUTCOME MEASURES:** The criterion firearm safety behaviors included both motor and verbal responses, which were assessed in a naturalistic setting and then assigned a numerical value based on a scale of 0 to 3. **RESULTS:** Both programs were effective for teaching children to verbalize the safety skills message (don't touch the gun, get away, and tell an adult). However, children who received behavioral skills training were significantly more likely to demonstrate the desired safety skills in role-playing assessments and in situ assessments than were children who received Eddie Eagle program training. In addition, in situ training was found to be effective for teaching the desired safety skills for both groups of children. **CONCLUSIONS:** Injury prevention programs using education-based learning materials are less effective for teaching children the desired safety skills, compared with programs incorporating active learning approaches (eg, modeling, rehearsal, and feedback). The efficacy of both types of injury prevention programs for teaching the desired skills could be significantly enhanced with the use of in situ training. This program, when implemented with 6- and 7-year-old children, was effective in teaching the desired safety skills

SN - 1098-4275

AD - Department of Psychology, North Dakota State University, Fargo, ND 58105, USA

UR - 15342889

ER -

TY - JOUR

ID - 348

T1 - Mother-Child touch patterns in infant feeding disorders: relation to maternal, child, and environmental factors

A1 - Feldman,R.

A1 - Keren,M.

A1 - Gross-Rozval,O.

A1 - Tyano,S.

Y1 - 2004/09//

N1 - Feldman, Ruth. Keren, Miri. Gross-Rozval, Orna. Tyano, Sam  
Journal of the American Academy of Child and Adolescent Psychiatry  
hg5, 8704565

IM

Journal Article. Research Support, Non-U.S. Gov't

English

KW - Medline

KW - Case-Control Studies

KW - Child

KW - Preschool

KW - Depression/di [Diagnosis]

KW - Depression/px [Psychology]

KW - Failure to Thrive/di [Diagnosis]  
 KW - Failure to Thrive/px [Psychology]  
 KW - Feeding Behavior  
 KW - Feeding and Eating Disorders of Childhood/di [Diagnosis]  
 KW - Feeding and Eating Disorders of Childhood/px [Psychology]  
 KW - Female  
 KW - Humans  
 KW - Infant  
 KW - Male  
 KW - Mother-Child Relations  
 KW - Personal Space  
 KW - Play and Playthings  
 KW - Risk Factors  
 KW - Social Environment  
 KW - Touch  
 RP - NOT IN FILE  
 SP - 1089  
 EP - 1097  
 JF - Journal of the American Academy of Child & Adolescent Psychiatry  
 JA - J Am Acad.Child Adolesc Psychiatry  
 VL - 43  
 IS - 9  
 CY - United States

N2 - OBJECTIVE: To examine mother and child's touch patterns in infant feeding disorders within a transactional framework. METHOD: Infants (aged 9-34 months) referred to a community-based clinic were diagnosed with feeding disorders (n = 20) or other primary disorder (n = 27) and were case matched with nonreferred controls (n = 47). Mother-child play and feeding were observed and the home environment was assessed. Microcoding detected touch patterns, response to partner's touch, and proximity at play. Relational behaviors were coded during feeding. RESULTS: Compared with infants with other primary disorder and case-matched controls, less maternal affectionate, proprioceptive, and unintentional touch was observed in those with feeding disorders. Children with feeding disorders displayed less affectionate touch, more negative touch, and more rejection of the mother's touch. More practical and rejecting maternal responses to the child's touch were observed, and children were positioned more often out of reach of the mothers' arms. Children with feeding disorders exhibited more withdrawal during feeding and the home environment was less optimal. Feeding efficacy was predicted by mother-child touch, reduced maternal depression and intrusiveness, easy infant temperament, and less child withdrawal, controlling for group membership. CONCLUSIONS: Proximity and touch are especially disturbed in feeding disorders, suggesting fundamental relationship difficulties. Mothers provide less touch that supports growth, and children demonstrate signs of touch aversion. Touch patterns may serve as risk indicators of potential growth failure. Copyright 2004 American Academy of Child and Adolescent Psychiatry

SN - 0890-8567  
 AD - Department of Psychology, Bar-Ilan University, Israel. feldman@mail.biu.ac.il  
 UR - 15322412  
 ER -

TY - JOUR  
 ID - 349  
 T1 - The ergonomics of children in playground equipment safety  
 A1 - Roderick,L.M.  
 Y1 - 2004///  
 N1 - Roderick, Larry M  
 Journal of safety research  
 1264241  
 IM  
 Editorial  
 English

KW - Medline  
KW - Child  
KW - Equipment Design  
KW - Human Engineering  
KW - Humans  
KW - Play and Playthings  
KW - Safety Management  
KW - United States  
KW - Wounds and Injuries/pc [Prevention & Control]  
RP - NOT IN FILE  
SP - 249  
EP - 254  
JF - Journal of Safety Research  
JA - J Safety Res.  
VL - 35  
IS - 3  
CY - United States  
N2 - INTRODUCTION: Annually, some 200,000 U.S. children require hospital emergency room treatment from injuries suffered on playground equipment. Most of these injuries (70%) are the result of falls. While standards for protective surfacing within the play zone areas are very adequate, standards for the prevention of falls are very inadequate. "Climbers" are responsible for the greatest percentage of injuries with most of these injuries the result of falls. Current standards are woefully lacking in regard to these climbers. METHOD: This paper reviews the history of climber research and climber standards. RESULTS: It then presents recommendations for improved standards in this area based on the ergonomics of the users, children  
SN - 0022-4375  
UR - 15288558  
ER -  
  
TY - JOUR  
ID - 350  
T1 - Predictors of effortful control among children of alcoholic and nonalcoholic fathers  
A1 - Eiden,R.D.  
A1 - Edwards,E.P.  
A1 - Leonard,K.E.  
Y1 - 2004/05//  
N1 - Eiden, Rina D. Edwards, Ellen P. Leonard, Kenneth E  
Journal of studies on alcohol  
7503813  
IM  
Journal Article. Research Support, U.S. Gov't, P.H.S.  
English  
KW - Medline  
KW - Alcoholism/ep [Epidemiology]  
KW - Child Behavior Disorders/ep [Epidemiology]  
KW - Child Psychology  
KW - Child of Impaired Parents/px [Psychology]  
KW - Child  
KW - Preschool  
KW - Fathers/sn [Statistics & Numerical Data]  
KW - Female  
KW - Humans  
KW - Infant  
KW - Male  
KW - Parenting  
KW - Play and Playthings  
KW - Prospective Studies

KW - Questionnaires

KW - Temperament

RP - NOT IN FILE

SP - 309

EP - 319

JF - Journal of Studies on Alcohol

VL - 65

IS - 3

CY - United States

N2 - **OBJECTIVE:** The purpose of this study was (1) to examine the association between fathers' alcoholism and children's effortful control and (2) to examine the role of parental warmth and toddler temperament as mediators or moderators of this relationship. **METHOD:** Families were recruited through New York State birth records when their infant was age 12 months. The final sample consisted of 226 families (116 boys) constituting two major groups: a nonalcoholic group consisting of parents with no or few current alcohol problems (n = 102) and a father alcoholic group (n = 124). Families were assessed when their child was ages 12, 18, 24 and 36 months. **RESULTS:** Results indicate that boys of alcoholic fathers exhibit lower overall levels of effortful control than boys of nonalcoholic fathers. For boys, fathers' warmth over the second year of life mediated the association between fathers' alcoholism and effortful control. Maternal warmth was a unique predictor of effortful control for boys. For girls, fathers' alcoholism was associated with lower paternal warmth, which was in turn a significant predictor of effortful control. Child activity level and negative affect were associated with effortful control for boys but did not account for significant variance when entered in regression models with fathers' alcoholism and parenting variables. **CONCLUSIONS:** Sons of alcoholic fathers are at an increased risk of problems in self-regulation when they are ages 2 to 3 years. Paternal warmth mediates the association between fathers' alcoholism and self-regulation for both boys and girls, although the nature of mediation may vary by child gender

SN - 0096-882X

AD - Research Institute on Addictions, University at Buffalo, State University of New York, 1021 Main Street, Buffalo, New York 14203, USA. eiden@ria.buffalo.edu

UR - 15222587

ER -

TY - JOUR

ID - 351

T1 - Are current playground safety standards adequate for preventing arm fractures?.[Erratum appears in Med J Aust. 2004 Nov 15;181(10):532]

A1 - Sherker,S.

A1 - Ozanne-Smith,J.

Y1 - 2004/06/07/

N1 - Sherker, Shauna. Ozanne-Smith, Joan

The Medical journal of Australia

0400714, m26

IM

Journal Article. Research Support, Non-U.S. Gov't

English

KW - Medline

KW - Accidental Falls/pc [Prevention & Control]

KW - Arm Injuries/pc [Prevention & Control]

KW - Child

KW - Female

KW - Fractures

KW - Bone/pc [Prevention & Control]

KW - Hospitalization/td [Trends]

KW - Humans

KW - Humeral Fractures/pc [Prevention & Control]

KW - Male

KW - Play and Playthings

KW - Radius Fractures/pc [Prevention & Control]

KW - Safety/st [Standards]

KW - Ulna Fractures/pc [Prevention & Control]

KW - Victoria

RP - NOT IN FILE

SP - 562

EP - 565

JF - Medical Journal of Australia

JA - Med J Aust

VL - 180

IS - 11

CY - Australia

N2 - OBJECTIVE: To assess compliance with current standards of playgrounds where children have sustained a fall-related arm fracture. DESIGN, SETTING AND PARTICIPANTS: Between October 2000 and December 2002, a consecutive prospective series of 402 children aged under 13 years who fell from playground equipment and sustained an arm fracture was identified by emergency department staff in five Victorian hospitals. Trained field testers measured playground equipment height, surface type and depth, and surface impact attenuation factors to determine compliance with safety standards. MAIN OUTCOME MEASURES: Playground compliance with current Australian safety standards. RESULTS: Ninety-eight percent of playgrounds had a recommended type of surface material. The mean surface depth was 11.1 cm (SD, 5.0 cm) and the mean equipment height was 2.04 m (SD, 0.43 m). Although over 85% of playgrounds complied with recommended maximum equipment height and surface impact attenuation characteristics, only 4.7% complied with recommended surface depth. CONCLUSION: Playgrounds where children have sustained an arm fracture generally comply with all important safety recommendations except surface depth. Playground fall-related arm fracture requires specific countermeasures for prevention, distinct from head injury prevention guidelines

SN - 0025-729X

AD - Accident Research Centre, Building 70, Monash University, Melbourne, VIC 3800, Australia.

ShaunaSherker@yahoo.com.au

UR - 15174986

ER -

TY - JOUR

ID - 352

T1 - Creating opportunities for parent empowerment: program effects on the mental health/coping outcomes of critically ill young children and their mothers

A1 - Melnyk,B.M.

A1 - Alpert-Gillis,L.

A1 - Feinstein,N.F.

A1 - Crean,H.F.

A1 - Johnson,J.

A1 - Fairbanks,E.

A1 - Small,L.

A1 - Rubenstein,J.

A1 - Slota,M.

A1 - Corbo-Richert,B.

Y1 - 2004/06//

N1 - Melnyk, Bernadette Mazurek. Alpert-Gillis, Linda. Feinstein, Nancy Fischbeck. Crean, Hugh F. Johnson, Jean. Fairbanks, Eileen. Small, Leigh. Rubenstein, Jeffrey. Slota, Margaret. Corbo-Richert, Beverly  
Pediatrics

oxv, 0376422

AIM, IM

Clinical Trial. Journal Article. Randomized Controlled Trial. Research Support, U.S. Gov't, P.H.S.

English

KW - Medline

KW - Adaptation

KW - Psychological



KW - Adult  
 KW - Child  
 KW - Child Behavior/px [Psychology]  
 KW - Hospitalized/px [Psychology]  
 KW - Preschool  
 KW - Critical Illness/px [Psychology]  
 KW - Depression/pc [Prevention & Control]  
 KW - Female  
 KW - Hospitalization  
 KW - Humans  
 KW - Infant  
 KW - Intensive Care Units  
 KW - Pediatric  
 KW - Male  
 KW - Mother-Child Relations  
 KW - Mothers/px [Psychology]  
 KW - Stress Disorders  
 KW - Post-Traumatic/pc [Prevention & Control]  
 KW - Stress  
 KW - Psychological/th [Therapy]  
 RP - NOT IN FILE  
 SP - e597  
 EP - e607  
 JA - Pediatrics  
 VL - 113  
 IS - 6  
 CY - United States

**N2 - OBJECTIVE:** Increasing numbers of children in the United States (ie, approximately 200 children per 100,000 population) require intensive care annually, because of advances in pediatric therapeutic techniques and a changing spectrum of pediatric disease. These children are especially vulnerable to a multitude of short- and long-term negative emotional, behavioral, and academic outcomes, including a higher risk of posttraumatic stress disorder (PTSD) and a greater need for psychiatric treatment, compared with matched hospitalized children who do not require intensive care. In addition, the parents of these children are at risk for the development of PTSD, as well as other negative emotional outcomes (eg, depression and anxiety disorders). There has been little research conducted to systematically determine the effects of interventions aimed at improving psychosocial outcomes for critically ill children and their parents, despite recognition of the adverse effects of critical care hospitalization on the nonphysiologic well-being of patients and their families. The purpose of this study was to evaluate the effects of a preventive educational-behavioral intervention program, the Creating Opportunities for Parent Empowerment (COPE) program, initiated early in the intensive care unit hospitalization on the mental health/psychosocial outcomes of critically ill young children and their mothers.

**DESIGN:** A randomized, controlled trial with follow-up assessments 1, 3, 6, and 12 months after hospitalization was conducted with 174 mothers and their 2- to 7-year-old children who were unexpectedly hospitalized in the pediatric intensive care units (PICUs) of 2 children's hospitals. The final sample of 163 mothers ranged in age from 18 to 52 years, with a mean of 31.2 years. Among the mothers reporting race/ethnicity, the sample included 116 white (71.2%), 33 African American (20.3%), 3 Hispanic (1.8%), and 2 Indian (1.2%) mothers. The mean age of the hospitalized children was 50.3 months. Ninety-nine children (60.7%) were male and 64 (39.3%) were female. The major reasons for hospitalization were respiratory problems, accidental trauma, neurologic problems, and infections. Fifty-seven percent (n = 93) of the children had never been hospitalized overnight, and none had experienced a previous PICU hospitalization.

**INTERVENTIONS:** Mothers in the experimental (COPE) group received a 3-phase educational-behavioral intervention program 1) 6 to 16 hours after PICU admission, 2) 2 to 16 hours after transfer to the general pediatric unit, and 3) 2 to 3 days after their children were discharged from the hospital. Control mothers received a structurally equivalent control program. The COPE intervention was based on self-regulation theory, control theory, and the emotional contagion hypothesis. The COPE program, which was delivered with audiotapes and matching written information, as well as a parent-child activity workbook that facilitated implementing the audiotaped information, focused on increasing 1) parents' knowledge and understanding of the range of behaviors and emotions that young children

typically display during and after hospitalization and 2) direct parent participation in their children's emotional and physical care. The COPE workbook, which was provided to parents and children after transfer from the PICU to the general pediatric unit, contained 3 activities to be completed before discharge from the hospital, ie, 1) puppet play to encourage expression of emotions in a nonthreatening manner, 2) therapeutic medical play to assist children in obtaining some sense of mastery and control over the hospital experience, and 3) reading and discussing *Jenny's Wish*, a story about a young child who successfully copes with a stressful hospitalization.

**OUTCOME MEASURES:** Primary outcomes included maternal anxiety, negative mood state, depression, maternal beliefs, parental stress, and parent participation in their children's care, as well as child adjustment, which was assessed with the Behavioral Assessment System for Children (parent form). RESn (parent form).

**RESULTS:** COPE mothers reported significantly less parental stress and participated more in their children's physical and emotional care on the pediatric unit, compared with control mothers, as rated by nurses who were blinded with respect to study group. In comparison with control mothers, COPE mothers reported less negative mood state, less depression, and fewer PTSD symptoms at certain follow-up assessments after hospitalization. In addition, COPE mothers reported stronger beliefs regarding their children's likely responses to hospitalization and how they could enhance their children's adjustment, compared with control mothers. COPE children, in comparison with control children, exhibited significantly fewer withdrawal symptoms 6 months after discharge, as well as fewer negative behavioral symptoms and externalizing behaviors at 12 months. COPE mothers also reported less hyperactivity and greater adaptability among their children at 12 months, compared with control mothers. One year after discharge, a significantly higher percentage of control group children (25.9%) exhibited clinically significant behavioral symptoms, compared with COPE children (2.3%). In addition, 6 and 12 months after discharge, significantly higher percentages of control group children exhibited clinically significant externalizing symptoms (6 months, 14.3%; 12 months, 22.2%), compared with COPE children (6 months, 1.8%; 12 months, 4.5%).

**CONCLUSIONS:** The findings of this study indicated that mothers who received the COPE program experienced improved maternal functional and emotional coping outcomes, which resulted in significantly fewer child adjustment problems, in comparison with the control group. With the increasing prevalence of attention-deficit/hyperactivity disorder and externalizing problems among children and the documented lack of mental health screening and early intervention services for children in this country, the COPE intervention could help protect this high-risk population of children from developing these troublesome problems. As a result, the mental health status of children after critical care hospitalization could be improved. With routine provision of the COPE program in PICUs throughout the country, family burdens and costs associated with the mental health treatment of these problems might be substantially reduced

SN - 1098-4275

AD - School of Nursing, University of Rochester, Rochester, New York 14642, USA.

bernadette\_melnyk@urmc.rochester.edu

UR - 15173543

ER -

TY - JOUR

ID - 353

T1 - Safe play takes planning: what role would you have?

A1 - Ilardi,D.

Y1 - 2004/05//

N1 - Ilardi, Deb

School nurse news

100956395

N

Journal Article

English

KW - Medline

KW - Child

KW - Clothing/ae [Adverse Effects]

KW - Equipment Safety

KW - Humans

KW - Needs Assessment

KW - Nurse's Role

KW - Nursing Assessment

KW - Patient Care Planning/og [Organization & Administration]

KW - Planning Techniques

KW - Play and Playthings/in [Injuries]

KW - Play and Playthings

KW - Safety Management/og [Organization & Administration]

KW - School Health Services

KW - School Nursing/og [Organization & Administration]

KW - Sunburn/pc [Prevention & Control]

RP - NOT IN FILE

SP - 26

EP - 31

JF - School Nurse News

VL - 21

IS - 3

CY - United States

SN - 1080-7543

UR - 15171092

ER -

TY - JOUR

ID - 354

T1 - Unsafe to play? Neighborhood disorder and lack of safety predict reduced physical activity among urban children and adolescents

A1 - Molnar,B.E.

A1 - Gortmaker,S.L.

A1 - Bull,F.C.

A1 - Buka,S.L.

Y1 - 2004/05//

N1 - Molnar, Beth E. Gortmaker, Steven L. Bull, Fiona C. Buka, Stephen L

American journal of health promotion : AJHP

amj, 8701680

T

Journal Article. Research Support, Non-U.S. Gov't. Research Support, U.S. Gov't, P.H.S.

English

KW - Medline

KW - Adolescent

KW - Adolescent Behavior/eh [Ethnology]

KW - Anomie

KW - Censuses

KW - Chicago

KW - Child

KW - Child Behavior/eh [Ethnology]

KW - Environment Design

KW - Exercise

KW - Female

KW - Health Behavior/eh [Ethnology]

KW - Health Behavior

KW - Humans

KW - Longitudinal Studies

KW - Male

KW - Residence Characteristics/sn [Statistics & Numerical Data]

KW - Safety/sn [Statistics & Numerical Data]

KW - Social Conditions

KW - Urban Health/sn [Statistics & Numerical Data]

RP - NOT IN FILE

SP - 378

EP - 386

JF - American Journal of Health Promotion

JA - Am J Health Promot

VL - 18

IS - 5

CY - United States

N2 - **PURPOSE:** Lack of physical activity is associated with increased risk of overweight and cardiovascular disease, conditions associated with lower socioeconomic status (SES). Associations between activity levels of urban youth and limited access to safe recreation areas in their neighborhoods of residence were investigated. **DESIGN:** Analyses of data from the Project on Human Development in Chicago Neighborhoods, a multilevel longitudinal study of families and communities, are reported. **SETTING:** Chicago, Illinois. **SUBJECTS:** Individual-level data were obtained from 1378 youth 11 to 16 years old and caregivers living in 80 neighborhood clusters. Neighborhood-level data were collected from 8782 community residents and videotapes of 15,141 block faces. **MEASURES:** Parental estimates of hours youth spent in recreational programming were used to estimate physical activity. A scale of residents' assessment of neighborhood safety for children's play was created; disorder measures came from videotaped observations. **RESULTS:** Physical activity averaged 2.7 hours/week (SD = 5.0), varying significantly across neighborhoods. Using hierarchical linear regression, SES, age, and male gender, but not body mass index, were independently associated with physical activity. Lower neighborhood safety and social disorder were significantly associated with less activity, controlling for demographics. **CONCLUSIONS:** One mechanism for reduced physical activity among youth may be the influence of unsafe neighborhoods. Neighborhood interventions to increase safety and reduce disorder may be efficacious in increasing physical activity, thereby reducing risk of overweight and cardiovascular disease

SN - 0890-1171

AD - Department of Society, Human Development, and Health, Harvard School of Public Health, Boston, Massachusetts 02115, USA

UR - 15163139

ER -

TY - JOUR

ID - 355

T1 - Teaching safety skills to children to prevent gun play

A1 - Himle,M.B.

A1 - Miltenberger,R.G.

A1 - Flessner,C.

A1 - Gatheridge,B.

Y1 - 2004///

N1 - Himle, Michael B. Miltenberger, Raymond G. Flessner, Christopher. Gatheridge, Brian  
Journal of applied behavior analysis

0174763, hdr

IM

Journal Article

English

KW - Medline

KW - Child Behavior/px [Psychology]

KW - Child

KW - Preschool

KW - Firearms

KW - Generalization (Psychology)

KW - Humans

KW - Play and Playthings

KW - Safety

KW - Teaching/mt [Methods]

RP - NOT IN FILE

SP - 1

EP - 9

JF - Journal of Applied Behavior Analysis

JA - J Appl.Behav Anal.

VL - 37

IS - 1

CY - United States

N2 - Research has shown that children often engage in gun play when they find a firearm and that this behavior is often involved in unintentional firearm injuries. Previous research has shown existing programs to be ineffective for teaching children safety skills to reduce gun play. This study examined the effectiveness of a behavioral skills training (BST) program supplemented with in situ training for teaching children safety skills to use when they find a gun (i.e., don't touch, leave the area, tell an adult). Eight 4- to 5-year-old children were trained and assessed in a naturalistic setting and in a generalized setting in a multiple baseline across subjects design. Results showed that 3 of the children performed the skills after receiving BST, whereas 5 of the children required supplemental in situ training. All children in the study learned to perform the skills when assessed in a naturalistic setting and when assessed in a generalization setting. Performance was maintained at 2- to 8-week follow-up assessments

SN - 0021-8855

AD - North Dakota State University, Fargo, North Dakota 58105, USA

UR - 15154211

ER -

TY - JOUR

ID - 356

T1 - Policy issues and risk-benefit trade-offs of 'safer surfacing' for children's playgrounds

A1 - Ball,D.J.

Y1 - 2004/07//

N1 - Ball, David J

Accident; analysis and prevention

acs, 1254476

IM

Journal Article. Research Support, Non-U.S. Gov't

English

KW - Medline

KW - Adolescent

KW - Child

KW - Preschool

KW - Construction Materials

KW - Environment Design

KW - Great Britain/ep [Epidemiology]

KW - Health Policy

KW - Humans

KW - Infant

KW - Models

KW - Theoretical

KW - Play and Playthings

KW - Risk Assessment

KW - Risk Management

KW - Wounds and Injuries/mo [Mortality]

KW - Wounds and Injuries/pc [Prevention & Control]

RP - NOT IN FILE

SP - 661

EP - 670

JF - Accident Analysis & Prevention

JA - Accid.Anal.Prev.

VL - 36

IS - 4

CY - England

N2 - The case for the universal application of 'safer surfacing' in playgrounds is assessed in terms of absolute risk, cost-benefit, and qualitative factors, and found to be open to question on each front. In parallel, it is noted that members of the child welfare and play communities are increasingly of the view that playgrounds are losing their appeal for children, which in turn has its own health, safety and developmental consequences. In part, this loss of attractiveness may have linkages with the recent concern over play safety and the imposition of measures such as 'safer surfacing'. It is proposed that the drive for play safety, which has existed for some 20 years, should be succeeded by a more holistic approach which, rather than considering play safety in isolation, acknowledges the importance of all attributes of play including child safety both on and off playgrounds, potential beneficial aspects of childhood risk exposure, adventure, and play value

SN - 0001-4575

AD - Centre for Decision Analysis and Risk Management, School of Health and Social Sciences, Middlesex University, Queensway, Enfield, Middlesex EN3 4SF, UK. d.ball@mdx.ac.uk

UR - 15094421

ER -

TY - JOUR

ID - 357

T1 - Measuring parent attributes and supervision behaviors relevant to child injury risk: examining the usefulness of questionnaire measures

A1 - Morrongiello,B.A.

A1 - House,K.

Y1 - 2004/04//

N1 - Morrongiello, B A. House, K

Injury prevention : journal of the International Society for Child and Adolescent Injury Prevention  
crz, 9510056

IM

Journal Article. Research Support, Non-U.S. Gov't

English

KW - Medline

KW - Accident Prevention

KW - Attitude to Health

KW - Child Behavior

KW - Child Care/mt [Methods]

KW - Child

KW - Preschool

KW - Female

KW - Humans

KW - Male

KW - Parent-Child Relations

KW - Parenting

KW - Parents/px [Psychology]

KW - Parents

KW - Play and Playthings

KW - Questionnaires

KW - Risk Factors

KW - Safety

KW - Self-Assessment

KW - Wounds and Injuries/et [Etiology]

KW - Wounds and Injuries/pc [Prevention & Control]

RP - NOT IN FILE

SP - 114

EP - 118

JA - Injury Prevention

VL - 10

IS - 2

CY - England

**N2 - OBJECTIVE:** This study aimed to identify self report questionnaire measures of parent attributes and behaviors that have relevance for understanding injury risk among children 2-5 years of age, and test a new Parent Supervision Attributes Profile Questionnaire (PSAPQ) that was developed to measure aspects of protectiveness and parent supervision. **METHODS:** Naturalistic observations were conducted of parents' supervision of children on playgrounds, with questionnaires subsequently completed by the parent to measure parent education, family income, parent personality attributes, attributes relevant to parent supervision, and beliefs about parents' control over the child's health status. These measures were then related to children's risk taking and injury history. **RESULTS:** Visual supervision, auditory supervision, and physical proximity were highly intercorrelated, indicating that parents employed all types of behaviors in service of supervision, rather than relying predominantly on one type of supervisory behavior. Physical proximity was the only aspect of supervision behavior that served a protective function and related to children's risk taking behaviors: parents who remained close to their children had children who engaged in less risk taking. On questionnaires, parents who reported more conscientiousness, protectiveness, worry about safety, vigilance in supervision, confidence in their ability to keep their child safe, and belief in control over their child's health had children who showed less risk taking and/or experienced fewer injuries. The new PSAPQ measure was associated with specific aspects of supervision as well as children's risk taking and injury history. **CONCLUSIONS:** This study reveals several parent attributes and behaviors with relevance for child injury risk that can be measured via self report questionnaires, including the new PSAPQ

SN - 1353-8047

AD - Psychology Department, University of Guelph, Guelph, Ontario, Canada. bmorrong@uoguelph.ca

UR - 15066978

ER -

TY - JOUR

ID - 358

T1 - Head injury and limb fracture in modern playgrounds

A1 - Norton,C.

A1 - Rolfe,K.

A1 - Morris,S.

A1 - Evans,R.

A1 - James,R.

A1 - Jones,M.D.

A1 - Cory,C.

A1 - Dunstan,F.

A1 - Sibert,J.R.

Y1 - 2004/02//

N1 - Norton, C. Rolfe, K. Morris, S. Evans, R. James, R. Jones, M D. Cory, C. Dunstan, F. Sibert, J R

Archives of disease in childhood

6xg, 0372434

AIM, IM

Journal Article. Research Support, Non-U.S. Gov't

English

KW - Medline

KW - Accident Prevention

KW - Accidental Falls

KW - Adolescent

KW - Arm Injuries/ep [Epidemiology]

KW - Child

KW - Preschool

KW - Craniocerebral Trauma/ep [Epidemiology]

KW - Female

KW - Fractures

KW - Bone/ep [Epidemiology]

KW - Humans

KW - Infant

KW - Male

KW - Play and Playthings/in [Injuries]

KW - Prevalence

KW - Safety Management

KW - Wales/ep [Epidemiology]

RP - NOT IN FILE

SP - 152

EP - 153

JF - Archives of Disease in Childhood

JA - Arch.Dis.Child

VL - 89

IS - 2

CY - England

N2 - There were no serious head injuries in modern Cardiff municipal playgrounds with safety surfaces over five years injury surveillance. The literature suggests serious head injuries did occur before the introduction of safety surfaces

SN - 1468-2044

AD - Accident and Emergency Department, Cardiff and Vale NHS Trust, UK

UR - 14736633

ER -

TY - JOUR

ID - 359

T1 - Investigation of the level of safety and appropriateness of playgrounds in Elazig city in Turkey

A1 - AcIk, Y.

A1 - Gulbayrak, C.

A1 - Turaci, Celik G.

Y1 - 2004/02//

N1 - AcIk, Yasemin. Gulbayrak, Canan. Turaci Celik, Gulen

International journal of environmental health research

9106628, dus

IM

Journal Article

English

KW - Medline

KW - Accident Prevention

KW - Child

KW - Preschool

KW - Equipment Design

KW - Guideline Adherence

KW - Humans

KW - Play and Playthings

KW - Safety

KW - Turkey

KW - Wounds and Injuries/pc [Prevention & Control]

RP - NOT IN FILE

SP - 75

EP - 82

JF - International Journal of Environmental Health Research

JA - Int.J Environ.Health Res.

VL - 14

IS - 1

CY - England

N2 - This study was conducted to identify and evaluate the degree of appropriateness of children's playground standards and the level of compliance with the current safety specifications of the playgrounds in Elazig city in Turkey. This was accomplished by on-site observation and measurement in the total of 24 playgrounds present in this city centre. It was determined that 83.3% of the playgrounds were next to a street and in 60% of these



playgrounds there were no fences or any barrier to keep children from running into the street. In 87.5% of playgrounds the surfacing was not in proper depth and good order. Separate playgrounds for different ages were provided in only 12.5% of the playgrounds. In 62.5% of the playgrounds children were supervised to make sure they were safe. There was unsafe equipment in 95.8% of the playgrounds. In 83.3% of the playgrounds there were sharp edges, pinch points, or playground debris that might injure a child. The findings of the present study indicate that nearly all of the playgrounds in Elazig city center do not meet the criteria for playground standards and are not in compliance with the current safety specifications and need improvement

SN - 0960-3123

AD - Department of Public Health, Faculty of Medicine, Firat University, Elazig, Turkey. yacik@firat.edu.tr

UR - 14660120

ER -

TY - JOUR

ID - 360

T1 - The play and language behavior of mothers with and without dyslexia and its association to their toddlers' language development

A1 - Lyytinen,P.

A1 - Eklund,K.

A1 - Lyytinen,H.

Y1 - 2003/01//

N1 - Lyytinen, Paula. Eklund, Kenneth. Lyytinen, Heikki

Journal of learning disabilities

0157312, iwo

IM

Journal Article. Research Support, Non-U.S. Gov't

English

KW - Medline

KW - Child Language

KW - Child

KW - Preschool

KW - Dyslexia/di [Diagnosis]

KW - Dyslexia/ep [Epidemiology]

KW - Female

KW - Follow-Up Studies

KW - Humans

KW - Infant

KW - Language

KW - Male

KW - Maternal Behavior

KW - Mother-Child Relations

KW - Mothers/sn [Statistics & Numerical Data]

KW - Play and Playthings

KW - Questionnaires

KW - Verbal Behavior

RP - NOT IN FILE

SP - 74

EP - 86

JF - Journal of Learning Disabilities

JA - J Learn.Disabil.

VL - 36

IS - 1

CY - United States

N2 - The play and language behavior of mothers with (n = 49) and without (n = 49) specific reading disabilities (RD) was investigated during play with their 14-month-old children. The contribution of maternal behavior to the language development of their children was examined. The children's receptive and expressive language skills were assessed longitudinally at 14, 18, and 30 months, using the MacArthur Communicative Development

Inventories and the Reynell Developmental Language Scales. Children with and without familial risk for RD did not differ from each other in any play or language measures at these ages. No group differences were found for mothers' manifestations of nonsymbolic play and language. However, the typically reading (TR) mothers produced significantly more symbolic play and language in play interactions with their child than did the mothers with RD. The correspondence between mother-child symbolic play and maternal play-related language was also higher for the TR group than it was for the RD group. The mothers' symbolic play did not show any relation to their children's language development, but their expressions of symbolic language did show a relationship. The mothers' child-directed symbolic language contributed significantly toward the comprehension skills of 14- and 18-month-olds in the RD group. This association, however, was lower at 30 months, at which point it was reliably present for the first time in the TR group

SN - 0022-2194

AD - Department of Psychology, University of Jyväskylä, Agora, Finland. plyytine@psyka.jyu.fi

UR - 15490894

ER -

TY - JOUR

ID - 361

T1 - Effects of gun admonitions on the behaviors and attitudes of school-aged boys

A1 - Hardy,M.S.

Y1 - 2003/10//

N1 - Hardy, Marjorie S

Journal of developmental and behavioral pediatrics : JDBP

htf, 8006933

IM

Journal Article

English

KW - Medline

KW - Adolescent

KW - Adolescent Behavior

KW - Attitude

KW - Child

KW - Child Behavior

KW - Firearms

KW - Health Education

KW - Humans

KW - Male

KW - Play and Playthings/px [Psychology]

KW - Safety

KW - Schools

RP - NOT IN FILE

SP - 352

EP - 358

JF - Journal of Developmental & Behavioral Pediatrics

JA - J Dev.Behav Pediatr

VL - 24

IS - 5

CY - United States

N2 - Gun-safety programs frequently warn children not to touch guns with little consideration that the messages may enhance the allure of the guns. In the current study, boys rated and ranked their preference for a gun in comparison with other desirable objects. One week later, when left alone in the room with the objects, they were forbidden to touch either the gun or some other object. Observations of their behavior and reevaluation of their attitudes followed. Although the boys forbidden to touch the gun did not report an increased preference for it, all participants were significantly more likely to touch the forbidden gun than to touch other forbidden objects. Age, parent- and coach-reported simulated gun-play, and coach-reported risky behavior predicted gun-touching behavior. The results of the current study indicate that guns hold a unique allure and cast further doubt on the ability of gun admonitions to keep children safe around guns

SN - 0196-206X

AD - Department of Psychology, Eckerd College, St. Petersburg, FL 33711, USA

UR - 14578696

ER -

TY - JOUR

ID - 362

T1 - Evaluation of North Carolina child care safety regulations

A1 - Kotch,J.B.

A1 - Hussey,J.M.

A1 - Carter,A.

Y1 - 2003/09//

N1 - Kotch, J B. Hussey, J M. Carter, A

Injury prevention : journal of the International Society for Child and Adolescent Injury Prevention  
crz, 9510056

IM

Evaluation Studies. Journal Article. Research Support, Non-U.S. Gov't

English

KW - Medline

KW - Child

KW - Child Care/lj [Legislation & Jurisprudence]

KW - Child Day Care Centers/lj [Legislation & Jurisprudence]

KW - Child Day Care Centers/st [Standards]

KW - Child Day Care Centers/td [Trends]

KW - Environment Design/st [Standards]

KW - Humans

KW - North Carolina

KW - Patient Acceptance of Health Care

KW - Play and Playthings/in [Injuries]

KW - Questionnaires

KW - Risk Factors

KW - Safety/lj [Legislation & Jurisprudence]

RP - NOT IN FILE

SP - 220

EP - 225

JA - Injury Prevention

VL - 9

IS - 3

CY - England

N2 - INTRODUCTION: The goal of this study was to track any changes in injuries and injury hazards during the first 3.5 years of implementation of the North Carolina Child Care Commission's 1996 playground safety regulations. METHODS: All reports (n=5402) of medically attended injuries in regulated child care settings in North Carolina during the period 1 January 1997 through 30 June 2000 were reviewed and analyzed. A total of 294 playground safety inspections were conducted in November and December 1998 in randomly selected North Carolina child care centers, and the playground safety inspections were repeated in 76 child care centers in August 2000. Finally, in 1999 a 1992 child care center director self assessment of safety features in classrooms was sent to the directors of 291 of the 294 centers. RESULTS: The annual rate of reported, medically attended injuries occurring in regulated child care facilities in North Carolina declined by 22% from 1997 to 1999. The playground safety inspections in the year 2000 revealed that, for nine of 10 playground concerns and 12 of 18 playground safety hazards, average ratings were equal to or better than those of 1998. Finally, the director surveys revealed no dramatic changes in classroom safety hazards since 1992.

DISCUSSION: This study represents the first time that the authors are aware of that a significant decline in state-wide child care injury rates has been associated with improved regulation of playground safety in the US

SN - 1353-8047

AD - Department of Maternal and Child Health, School of Public Health, University of North Carolina at Chapel Hill, 27599, USA. jonathan\_kotch@unc.edu

UR - 12966009

ER -

TY - JOUR

ID - 363

T1 - Injury and frequency of use of playground equipment in public schools and parks in Brisbane, Australia

A1 - Nixon,J.W.

A1 - Acton,C.H.

A1 - Wallis,B.

A1 - Ballesteros,M.F.

A1 - Battistutta,D.

Y1 - 2003/09//

N1 - Nixon, J W. Acton, C H C. Wallis, B. Ballesteros, M F. Battistutta, D

Injury prevention : journal of the International Society for Child and Adolescent Injury Prevention  
crz, 9510056

IM

Journal Article. Research Support, Non-U.S. Gov't

English

KW - Medline

KW - Australia/ep [Epidemiology]

KW - Child

KW - Emergencies/ep [Epidemiology]

KW - Environmental Exposure

KW - Equipment Design

KW - Humans

KW - Play and Playthings/in [Injuries]

KW - Recreation

KW - Risk Factors

KW - Safety

KW - Schools

KW - Urban Health

RP - NOT IN FILE

SP - 210

EP - 213

JA - Injury Prevention

VL - 9

IS - 3

CY - England

N2 - OBJECTIVE: The purpose of this study was to determine the frequency of use of play equipment in public schools and parks in Brisbane, Australia, and to estimate an annual rate of injury per use of equipment, overall and for particular types of equipment. METHODS: Injury data on all children injured from playground equipment and seeking medical attention at the emergency department of either of the two children's hospitals in the City of Brisbane were obtained for the years 1996 and 1997. Children were observed at play on five different pieces of play equipment in a random sample of 16 parks and 16 schools in the City of Brisbane. Children injured in the 16 parks and schools were counted, and rates of injury and use were calculated.

RESULTS: The ranked order for equipment use in the 16 schools was climbing equipment (3762 uses), horizontal ladders (2309 uses), and slides (856 uses). Each horizontal ladder was used 2.6 times more often than each piece of climbing equipment. Each horizontal ladder was used 7.8 times more than each piece of climbing equipment in the sample of public parks. Slides were used 4.6 times more than climbing equipment in parks and 1.2 times more in public schools. The annual injury rate for the 16 schools and 16 parks under observation was 0.59/100 000 and 0.26/100 000 uses of equipment, respectively. CONCLUSIONS: This study shows that annual number of injuries per standardized number of uses could be used to determine the relative risk of particular pieces of playground equipment. The low overall rate of injuries/100 000 uses of equipment in this study suggests that the benefit of further reduction of injury in this community may be marginal and outweigh the economic costs in addition to reducing challenging play opportunities

SN - 1353-8047

AD - Department of Paediatrics and Child Health, University of Queensland, Brisbane, Australia.

j.nixon@uq.edu.au

UR - 12966007

ER -

TY - JOUR

ID - 364

T1 - Association of maternal obesity and depressive symptoms with television-viewing time in low-income preschool children

A1 - Burdette,H.L.

A1 - Whitaker,R.C.

A1 - Kahn,R.S.

A1 - Harvey-Berino,J.

Y1 - 2003/09//

N1 - Burdette, Hillary L. Whitaker, Robert C. Kahn, Robert S. Harvey-Berino, Jean

Archives of pediatrics & adolescent medicine

9422751, bwf

AIM, IM

Journal Article. Research Support, Non-U.S. Gov't. Research Support, U.S. Gov't, Non-P.H.S.. Research Support, U.S. Gov't, P.H.S.

English

KW - Medline

KW - Adult

KW - Body Mass Index

KW - Chi-Square Distribution

KW - Child

KW - Preschool

KW - Cross-Sectional Studies

KW - Depression/ep [Epidemiology]

KW - Female

KW - Humans

KW - Male

KW - Mothers/px [Psychology]

KW - Obesity/ep [Epidemiology]

KW - Poverty

KW - Questionnaires

KW - Risk Factors

KW - Television

KW - Vermont/ep [Epidemiology]

RP - NOT IN FILE

SP - 894

EP - 899

JF - Archives of Pediatrics & Adolescent Medicine

JA - Arch.Pediatr Adolesc Med

VL - 157

IS - 9

CY - United States

N2 - **BACKGROUND:** Decreasing television (TV)-viewing time may improve child health and well-being. These viewing patterns are shaped during the preschool years. Because mothers play an important role in determining how much TV their preschool children watch, a better understanding is needed of the maternal factors that influence children's TV viewing. **OBJECTIVE:** To examine the relationship of depressive symptoms and obesity in low-income mothers with TV-viewing time in their preschool children. **METHODS:** Cross-sectional, self-administered survey of 295 low-income mothers of 3- and 4-year-old children (92% white) enrolled in the Vermont Special Supplemental Nutrition Program for Women, Infants, and Children. Mothers reported children's usual weekday and weekend-day TV-viewing time. Maternal depressive symptoms were measured with the Center for Epidemiologic Studies Depression Scale (CES-D). Maternal body mass index was

calculated from self-reported height and weight measurements (weight in kilograms divided by height in meters squared). RESULTS: Children watched a mean of 2.2 +/-1.2 hours of TV per day. Those in the upper quartile of TV-viewing time (high TV viewers) watched 3 or more hours of TV per day. Of the mothers, 12% had both obesity (BMI > or =30) and depressive symptoms (CES-D score > or =16), 19% were obese only, and 18% had depressive symptoms only. Children were more likely to be high TV viewers if their mothers had clinically significant depressive symptoms (35% vs 23%; P =.03) or if their mothers were obese (35% vs 22%; P =.03). Forty-two percent of children were high TV viewers if the mother had both depressive symptoms and obesity, 30% if the mother had only depressive symptoms, 29% if the mother had only obesity, and 20% if the mother had neither depressive symptoms nor obesity (P =.06 overall; P for trend =.009 using the chi2 test).

CONCLUSIONS: Among low-income preschool children, those whose mothers had either depressive symptoms or obesity were more likely to watch 3 or more hours of TV a day. Strategies to reduce TV viewing in young children should consider the role that maternal obesity and depressive symptoms may play in how preschool children spend their time

SN - 1072-4710

AD - Division of General and Community Pediatrics, Cincinnati Children's Hospital Medical Center, OH 45229-3039, USA. hillary.burdette@chmcc.org

UR - 12963595

ER -

TY - JOUR

ID - 365

T1 - [Playground safety: an introduction to the problem]. [Portuguese]

A1 - Harada,Mde J.

A1 - Pedreira,Mda L.

A1 - Andreotti,J.T.

Y1 - 2003/05//

N1 - Harada, Maria de Jesus C S. Pedreira, Mavilde da L G. Andreotti, Janaina Trevizan

Revista latino-americana de enfermagem

bxv, 9420934

N

English Abstract. Journal Article

Portuguese

KW - Medline

KW - Accident Prevention

KW - Accidents/mo [Mortality]

KW - Child

KW - Humans

KW - Play and Playthings

KW - Safety

RP - NOT IN FILE

SP - 383

EP - 386

JF - Revista Latino-Americana de Enfermagem

JA - Rev Lat.Am Enfermagem

VL - 11

IS - 3

CY - Brazil

N2 - This study aims to approach the theme of accident prevention in relation to the use of playground toys, which is little explored in national literature. It is estimated that, annually, more than 200,000 accidents with children happen in playgrounds in the United States of America. Besides discussing this problem, we present some general recommendations about safety in these places and a reflection on the need to alert and educate society about the importance of prevention

SN - 0104-1169

AD - Departamento de Enfermagem da Disciplina de enfermagem Pediatrica, Universidade Federal de Sao Paulo, Brazil. jjharada@uol.com.br

UR - 12958645

ER -

TY - JOUR

ID - 366

T1 - Psychological aspects of serious head injury in the competitive athlete. [Review] [37 refs]

A1 - Putukian,M.

A1 - Echemendia,R.J.

Y1 - 2003/07/20/

N1 - Putukian, Margot. Echemendia, Ruben J

Clinics in sports medicine

csm, 8112473

IM

Journal Article. Review

English

KW - Medline

KW - Adaptation

KW - Psychological

KW - Adolescent

KW - Adult

KW - Athletic Injuries/co [Complications]

KW - Athletic Injuries/px [Psychology]

KW - Child

KW - Preschool

KW - Competitive Behavior

KW - Craniocerebral Trauma/co [Complications]

KW - Craniocerebral Trauma/px [Psychology]

KW - Humans

KW - Mood Disorders/et [Etiology]

KW - Personality

KW - Post-Concussion Syndrome/di [Diagnosis]

KW - Post-Concussion Syndrome/et [Etiology]

KW - Risk Factors

KW - Self Concept

RP - NOT IN FILE

SP - 617

EP - 630

JF - Clinics in Sports Medicine

JA - Clin.Sports Med

VL - 22

IS - 3

CY - United States

N2 - In addition to the physical aspects of athletic injury, there are psychological aspects to consider. These are important during all phases of injury management: the acute injury, the rehabilitative process, and the return-to-play progression. Emotional disturbances are often associated with mild traumatic brain injury (mTBI) both directly and indirectly. Evaluating the athlete with mTBI can be made more difficult by the need to distinguish the physical and the emotional effects of injury and to differentiate the emotional factors directly related to the brain injury from those that arise indirectly (eg, reaction to being held out of play). This article discusses some of the psychological issues related to evaluating the head injured athlete. [References: 37]

SN - 0278-5919

AD - Primary Care Sports Medicine, The Pennsylvania State University, 1850 East Park Avenue, Suite 112, University Park, PA 16803, USA. mxp19@psu.edu

UR - 12852690

ER -

TY - JOUR

ID - 367

T1 - Effects of pairing aggressive and nonaggressive children in strategic peer affiliation

A1 - Hektner, J.M.

A1 - August, G.J.

A1 - Realmuto, G.M.

Y1 - 2003/08//

N1 - Hektner, Joel M. August, Gerald J. Realmuto, George M

Journal of abnormal child psychology

0364547, h33

IM

Journal Article. Research Support, Non-U.S. Gov't. Research Support, U.S. Gov't, P.H.S.

English

KW - Medline

KW - Aggression/px [Psychology]

KW - Child

KW - Female

KW - Follow-Up Studies

KW - Humans

KW - Male

KW - Peer Group

KW - Play and Playthings

KW - Sex Factors

KW - Social Perception

KW - Socioeconomic Factors

RP - NOT IN FILE

SP - 399

EP - 412

JF - Journal of Abnormal Child Psychology

JA - J Abnorm. Child Psychol.

VL - 31

IS - 4

CY - United States

N2 - Examined the behavior of 118 second graders who participated in a 6-week summer school program that incorporated strategic peer affiliation (a "buddy system"). Moderately aggressive children (the targets of the intervention) were paired with nonaggressive peers throughout the program. All participants were observed playing foosball with their buddies and with aggressive and nonaggressive nonbuddies as teammates. Aggressive children had lower levels of disruptive behavior when their teammate was nonaggressive, regardless of whether the teammate was a buddy. Nonaggressive children showed elevated disruptive behavior when playing with an aggressive nonbuddy, but not when playing with an aggressive buddy. The highest level of aggressive behavior was seen in pairs of aggressive teammates who were friends. One year later, no increase in peer-rated aggressive behavior was found in either group. Results suggest that unidirectional peer influence is possible and that strategic peer affiliation can be an effective intervention that does not put nonaggressive children at risk for acquiring undesired behaviors

SN - 0091-0627

AD - Department of Child Development and Family Science, North Dakota State University, Fargo, North Dakota 58105, USA. joel.hektner@ndsu.nodak.edu

UR - 12831229

ER -

TY - JOUR

ID - 368

T1 - Buffers of peer rejection among girls with and without ADHD: the role of popularity with adults and goal-directed solitary play

A1 - Mikami, A.Y.

A1 - Hinshaw, S.P.

Y1 - 2003/08//



N1 - Mikami, Amori Yee. Hinshaw, Stephen P

Journal of abnormal child psychology

0364547, h33

IM

Journal Article. Research Support, U.S. Gov't, P.H.S.

English

KW - Medline

KW - Aggression/px [Psychology]

KW - Anxiety/ep [Epidemiology]

KW - Anxiety/px [Psychology]

KW - Attention Deficit Disorder with Hyperactivity/ep [Epidemiology]

KW - Attention Deficit Disorder with Hyperactivity/px [Psychology]

KW - Child

KW - Depression/ep [Epidemiology]

KW - Depression/px [Psychology]

KW - Female

KW - Goals

KW - Humans

KW - Male

KW - Peer Group

KW - Play and Playthings

KW - Rejection (Psychology)

KW - Risk Factors

KW - Social Desirability

KW - Social Isolation

RP - NOT IN FILE

SP - 381

EP - 397

JF - Journal of Abnormal Child Psychology

JA - J Abnorm.Child Psychol.

VL - 31

IS - 4

CY - United States

N2 - We investigated a risk-resilience model in 91 girls with ADHD and 58 age- and ethnicity-equated comparison girls, who participated in all-female naturalistic summer research camps. The hypothesized risk factor was peer rejection (assessed via sociometric nominations), with criterion measures including multiinformant composites of aggressive behavior and anxious/depressed symptoms. The two hypothesized protective factors were the girls' popularity with adult staff (assessed via staff ratings) and objective observations of goal-directed solitary play. Peer rejection was related to higher levels of aggressive behavior and depressed/anxious behavior, confirming its status as a risk factor. Next, for all girls, popularity with adults predicted lower levels of aggression and goal-directed solitary play predicted lower levels of anxiety/depression. Whereas popularity with adults was most protective among the peer-accepted subgroup, solitary play was most protective among the peer-rejected subgroup. Diagnostic status (ADHD versus comparison) moderated the findings such that engaging in meaningful solitary play was a stronger predictor of lower levels of anxious/depressed behavior in girls with ADHD than in comparison girls. We discuss the need for replication in prospective research and implications for research and intervention regarding the social functioning of peer-rejected children, particularly those with behavior disorders

SN - 0091-0627

AD - University of California, Berkeley, California 94720-1650, USA

UR - 12831228

ER -

TY - JOUR

ID - 369

T1 - Comparing unintentional and intentional injuries in a school setting

A1 - Limbos,M.A.

A1 - Peek-Asa,C.  
 Y1 - 2003/03//  
 N1 - Limbos, Mary Ann P. Peek-Asa, Corinne  
 The Journal of school health  
 k13, 0376370  
 IM, N  
 Comparative Study. Journal Article  
 English  
 KW - Medline  
 KW - Accident Prevention  
 KW - Accidents/sn [Statistics & Numerical Data]  
 KW - Adolescent  
 KW - Age Distribution  
 KW - Child  
 KW - Female  
 KW - Humans  
 KW - Incidence  
 KW - Los Angeles/ep [Epidemiology]  
 KW - Male  
 KW - Play and Playthings  
 KW - Population Surveillance  
 KW - Risk Factors  
 KW - Risk Management  
 KW - Schools/sn [Statistics & Numerical Data]  
 KW - Sex Distribution  
 KW - Students/sn [Statistics & Numerical Data]  
 KW - Time Factors  
 KW - Urban Health/sn [Statistics & Numerical Data]  
 KW - Violence/pc [Prevention & Control]  
 KW - Violence/sn [Statistics & Numerical Data]  
 KW - Wounds and Injuries/ep [Epidemiology]  
 KW - Wounds and Injuries/et [Etiology]  
 KW - Wounds and Injuries/pc [Prevention & Control]  
 KW - Wounds and Injuries/px [Psychology]  
 RP - NOT IN FILE  
 SP - 101  
 EP - 106  
 JF - Journal of School Health  
 JA - J Sch Health  
 VL - 73  
 IS - 3  
 CY - United States

N2 - This study determined the incidence of violence-related injuries in an urban school district, and compared characteristics of unintentional and intentional school injuries. A sample of student Accident Report Forms completed for a school district in 1997 were reviewed for demographic characteristics of the student and injury characteristics. Injuries were categorized as unintentional, intentional, or of unknown intent. Annual incidence rates of injury per 100 students were calculated by intention, grade, and gender. Comparisons between unintentional and intentional injuries were made using odds ratios and 95% confidence intervals. Of 11,674 annualized injuries, 77.2% were unintentional, 16.8% were intentional, and 6.0% were of unknown intent. The overall annualized injury rate was 1.74 injuries per 100 students/year. The unintentional injury rate was almost five times the intentional injury rate of 0.29 injuries per 100 students/year. High school students had both the highest unintentional and intentional injury rates. Males in all grade levels had the highest rates of injury. Most injuries occurred during school hours. Intentional injuries were almost three times more likely to be associated with unstructured play or after school playground hours; were less likely to be witnessed events; and were more likely to occur on the surrounding school grounds than unintentional injuries. Unintentional injuries represent a greater risk to school children than do intentional injuries. A potential area to focus interventions for intentional

injuries are modifications of the school environment and surrounding grounds to improve supervision and monitoring

SN - 0022-4391

AD - USC Keck School of Medicine, Division of General Pediatrics, Childrens Hospital of Los Angeles, 4650 Sunset Blvd., MS# 76, Los Angeles, CA 90027, USA. mlimbos@chla.usc.edu

UR - 12677728

ER -

TY - JOUR

ID - 370

T1 - The relation between attention deficit hyperactivity disorder and substance abuse: what role does conduct disorder play?. [Review] [72 refs]

A1 - Flory,K.

A1 - Lynam,D.R.

Y1 - 2003/03//

N1 - Flory, Kate. Lynam, Donald R

Clinical child and family psychology review

dw5, 9807947

IM

Journal Article. Research Support, Non-U.S. Gov't. Research Support, U.S. Gov't, P.H.S.. Review

English

KW - Medline

KW - Adult

KW - Attention Deficit Disorder with Hyperactivity/ep [Epidemiology]

KW - Child

KW - Comorbidity

KW - Conduct Disorder/ep [Epidemiology]

KW - Humans

KW - Substance-Related Disorders/ep [Epidemiology]

RP - NOT IN FILE

SP - 1

EP - 16

JF - Clinical Child & Family Psychology Review

JA - Clin.Child Fam.Psychol.Rev

VL - 6

IS - 1

CY - United States

N2 - This paper presents a comprehensive review of the literature examining the relation between childhood attention deficit hyperactivity disorder (ADHD) and substance abuse. A number of researchers have statistically controlled for conduct disorder (CD) when examining the ADHD-substance-abuse relation. These studies have generally found that the ADHD-substance-abuse relation disappears when the high overlap between ADHD and CD is taken into account. On this basis, one may conclude that ADHD is unimportant to substance abuse. However, there is some evidence from both empirical studies and related fields that ADHD and CD may interact to afford a higher risk for substance abuse than may either disorder alone. Thus, ADHD appears to be important to substance abuse in that it interacts with CD to increase the risk. This paper calls for more research that directly examines the joint effects of ADHD and CD on risk for substance abuse. There is also a need for more research that examines gender differences, and mechanisms of the relations among ADHD, CD, and substance abuse. [References: 72]

SN - 1096-4037

AD - Department of Psychology, University of Kentucky, Lexington, Kentucky 40506-0044, USA.

khflor0@uky.edu

UR - 12659448

ER -

TY - JOUR

ID - 371

T1 - Inner ear damage in children due to noise exposure from toy cap pistols and firecrackers: a retrospective review of 53 cases

A1 - Segal,S.

A1 - Eviatar,E.

A1 - Lapinsky,J.

A1 - Shlamkovitch,N.

A1 - Kessler,A.

Y1 - 2003/01//

N1 - Segal, S. Eviatar, E. Lapinsky, J. Shlamkovitch, N. Kessler, A

Noise & health

9815620

IM

Journal Article

English

KW - Medline

KW - Adolescent

KW - Audiometry

KW - Pure-Tone

KW - Bone Conduction

KW - Child

KW - Child Welfare

KW - Dizziness/di [Diagnosis]

KW - Dizziness/et [Etiology]

KW - Dizziness/pc [Prevention & Control]

KW - Electronystagmography

KW - Female

KW - Firearms

KW - Hearing Loss

KW - Noise-Induced/di [Diagnosis]

KW - Noise-Induced/et [Etiology]

KW - Noise-Induced/pc [Prevention & Control]

KW - Humans

KW - Male

KW - Play and Playthings/in [Injuries]

KW - Retrospective Studies

KW - Safety

KW - Severity of Illness Index

KW - Speech Reception Threshold Test

KW - Tinnitus/di [Diagnosis]

KW - Tinnitus/et [Etiology]

KW - Tinnitus/pc [Prevention & Control]

KW - Tympanic Membrane Perforation/di [Diagnosis]

KW - Tympanic Membrane Perforation/et [Etiology]

KW - Tympanic Membrane Perforation/pc [Prevention & Control]

RP - NOT IN FILE

SP - 13

EP - 18

JF - Noise & Health

JA - Noise Health

VL - 5

IS - 18

CY - England

N2 - This retrospective study presents the findings of inner ear damage documented in 53 children exposed to impulsive sound emitted by toy weapons and firecrackers. There were 49 boys and four girls aged between four and fourteen years. Thirty-nine children were affected unilaterally while fourteen had bilateral hearing loss (total of 67 ears). Most of the hearing loss (>70%) was sensorineural high frequency hearing loss, while only

nine out of the 67 injured ears had sensorineural mid frequency hearing loss. Seven children sustained a traumatic ear drum perforation. Dizziness or tinnitus was reported by twenty children, with pathological ENG findings in four of them. This paper re-emphasizes the possibility of inner ear damage in children from exposure to noisy toys

SN - 1463-1741

AD - Department of Otolaryngology, Assaf Harofeh Medical Center, Affiliated to Sackler Faculty of Medicine, Tel Aviv University, Israel

UR - 12631431

ER -

TY - JOUR

ID - 372

T1 - Using an injury diary to describe the ecology of children's daily injuries

A1 - Schwebel,D.C.

A1 - Binder,S.C.

A1 - Plumert,J.M.

Y1 - 2002///

N1 - Schwebel, David C. Binder, Stephanie C. Plumert, Jodie M

Journal of safety research

1264241

IM

Journal Article. Research Support, Non-U.S. Gov't

English

KW - Medline

KW - Accident Prevention

KW - Accidental Falls/pc [Prevention & Control]

KW - Accidental Falls/sn [Statistics & Numerical Data]

KW - Accidents

KW - Home/pc [Prevention & Control]

KW - Home/sn [Statistics & Numerical Data]

KW - Analysis of Variance

KW - Causality

KW - Child

KW - Child Welfare

KW - Data Collection/mt [Methods]

KW - Data Interpretation

KW - Statistical

KW - Female

KW - Human Engineering

KW - Humans

KW - Male

KW - Medical Records/st [Standards]

KW - Parents

KW - Play and Playthings

KW - Safety Management

KW - Wounds and Injuries/et [Etiology]

RP - NOT IN FILE

SP - 301

EP - 319

JF - Journal of Safety Research

JA - J Safety Res.

VL - 33

IS - 3

CY - United States

N2 - PROBLEM: Two problems were addressed in this study. First, are daily injury diaries an effective means to gather information about children's unintentional injuries? Second, what are the circumstances of children's

injuries as recorded through the diary method? METHOD: Two studies were conducted with a total of 172 children to describe the ecology of children's daily unintentional injuries. Families completed a daily diary for 14 days, describing the circumstances surrounding the injuries children experienced each day. RESULTS: Descriptive data is provided on the locations, causes, and types of injuries children incurred, as well as who was present when they were injured. Daily injury rate was modestly related to the number of major injuries children had incurred in their lifetimes. DISCUSSION: The diary methodology was an effective means to study the ecology of children's daily injuries. Children's injuries occur in a wide range of circumstances that can be quantified through diary techniques. IMPACT ON INDUSTRY: Data obtained from daily injury diaries may be useful in a variety of areas, including study of the etiology of childhood injury, design of interventions to prevent injury, and engineering of toys and playground equipment for children

SN - 0022-4375

AD - Department of Psychology, University of Alabama at Birmingham, 1300 University Boulevard, 415 CH, Birmingham, AL 35294, USA. schwebel@uab.edu

UR - 12404995

ER -

TY - JOUR

ID - 373

T1 - ADHD outside the laboratory: boys' executive function performance on tasks in videogame play and on a visit to the zoo

A1 - Lawrence,V.

A1 - Houghton,S.

A1 - Tannock,R.

A1 - Douglas,G.

A1 - Durkin,K.

A1 - Whiting,K.

Y1 - 2002/10//

N1 - Lawrence, Vivienne. Houghton, Stephen. Tannock, Rosemary. Douglas, Graham. Durkin, Kevin. Whiting, Ken

Journal of abnormal child psychology

0364547, h33

IM

Journal Article. Research Support, Non-U.S. Gov't

English

KW - Medline

KW - Analysis of Variance

KW - Attention Deficit Disorder with Hyperactivity/px [Psychology]

KW - Child

KW - Cohort Studies

KW - Humans

KW - Inhibition (Psychology)

KW - Internal-External Control

KW - Male

KW - Memory/ph [Physiology]

KW - Neuropsychological Tests/sn [Statistics & Numerical Data]

KW - Psychomotor Performance/ph [Physiology]

KW - Task Performance and Analysis

KW - Video Games/px [Psychology]

RP - NOT IN FILE

SP - 447

EP - 462

JF - Journal of Abnormal Child Psychology

JA - J Abnorm.Child Psychol.

VL - 30

IS - 5

CY - United States

N2 - One current theory of attention-deficit/hyperactivity disorder (ADHD) proposes that a primary deficit in behavioral inhibition gives rise to secondary deficits in 4 executive functions and motor control. To date, empirical support for this model is based primarily on laboratory-based cognitive methods. This study assessed behavioral inhibition and executive functioning in children with ADHD in 2 real-life contexts: videogames (motor-skill target game, cognitively demanding adventure game) and an outing at the zoo (route tasks). Participants were a community sample of 57 boys diagnosed with ADHD (20 inattentive, 37 combined type) and 57 normally developing control boys, matched individually for age and nonverbal IQ. Operationally defined measures of behavioral inhibition and specific executive functions were derived from these activities and assessed under contrasting conditions of low or high working memory and distractor loads. There were no group differences in basic motor skills on the target game, nor in terms of the ability to inhibit a prepotent or ongoing response in the adventure videogame. However, boys with ADHD exhibited more self-talk, more effortful response preparation, and completed fewer challenges in the latter videogame. Also, they manifested inhibition deficits in terms of interference control during the route task at the zoo and took longer to complete the tasks. Typically, these differences were greatest under conditions of high working memory and distractor loads. Findings from this study suggest that cognitive difficulties in ADHD may be context dependent and that ADHD is associated with deficits in some but not all aspects of behavioral inhibition

SN - 0091-0627

AD - The Graduate School of Education, The University of Western Australia, Perth

UR - 12403149

ER -

TY - JOUR

ID - 374

T1 - Arsenic and barbecue

A1 - Lavelle, M.

Y1 - 2002/09/16/

N1 - Lavelle, Marianne

U.S. news & world report

9877797, wsl

K

News

English

KW - Medline

KW - Arsenic/an [Analysis]

KW - Arsenic/ec [Economics]

KW - Arsenic Poisoning/pc [Prevention & Control]

KW - Child

KW - Construction Materials/ae [Adverse Effects]

KW - Construction Materials/an [Analysis]

KW - Consumer Product Safety

KW - Humans

KW - Play and Playthings

KW - Public Health

KW - Recreation

KW - Risk Factors

KW - United States

KW - United States Environmental Protection Agency

KW - Wood

RP - NOT IN FILE

SP - 58

EP - 59

JF - US News & World Report

JA - US News World Rep.

VL - 133

IS - 10

CY - United States

SN - 0041-5537  
UR - 12298350  
ER -

TY - JOUR

ID - 375

T1 - Exposure to traffic among urban children injured as pedestrians

A1 - Posner, J.C.

A1 - Liao, E.

A1 - Winston, F.K.

A1 - Cnaan, A.

A1 - Shaw, K.N.

A1 - Durbin, D.R.

Y1 - 2002/09//

N1 - Posner, J.C. Liao, E. Winston, F.K. Cnaan, A. Shaw, K.N. Durbin, D.R.

Injury prevention : journal of the International Society for Child and Adolescent Injury Prevention  
crz, 9510056

IM

Journal Article. Research Support, Non-U.S. Gov't

English

KW - Medline

KW - Accidents

KW - Traffic/sn [Statistics & Numerical Data]

KW - Adolescent

KW - Age Factors

KW - Child

KW - Preschool

KW - Cross-Sectional Studies

KW - Female

KW - Humans

KW - Male

KW - Risk Factors

KW - Urban Health/sn [Statistics & Numerical Data]

KW - Walking/sn [Statistics & Numerical Data]

RP - NOT IN FILE

SP - 231

EP - 235

JA - Injury Prevention

VL - 8

IS - 3

CY - England

N2 - OBJECTIVES: To explore the immediate pre-crash activities and the routine traffic exposure (street crossing and play) in a sample of urban children struck by automobiles. In particular, the traffic exposure of children who were struck while playing was compared with that of those struck while crossing streets. DESIGN: Cross sectional survey. SETTING: Urban pediatric emergency department. PATIENTS: A total of 139 children ages 4-15 years evaluated for acute injuries resulting from pedestrian-motor vehicle collisions during a 14 month period. MAIN OUTCOME MEASURES: Sites of outdoor play, daily time in outdoor play, weekly number of street crossings, pre-crash circumstance (play v walking). RESULTS: Altogether 39% of the children routinely used the street and 64% routinely used the sidewalks as play areas. The median number of street crossings per week per child was 27. There were no differences in exposures for the 29% who were hit while playing compared with the 71% who were hit while walking. Although 84% of the children walked to or from school at least one day per week, only 15% of the children were struck while on the school walking trip. The remainder were injured either while playing outdoors or while walking to other places. CONCLUSIONS: Urban children who are victims of pedestrian crashes have a high level of traffic exposure from a variety of circumstances related to their routine outdoor playing and street crossing activities. The distributions of traffic exposures were similar across the sample, indicating that the sample as a whole had high traffic exposure,



regardless of the children's activity preceding the crash. Future pedestrian injury programs should address the pervasive nature of children's exposure to traffic during their routine outdoor activities

SN - 1353-8047

AD - Department of Pediatrics, Children's Hospital of Philadelphia, University of Pennsylvania School of Medicine, Philadelphia 19104, USA. posner@email.chop.edu

UR - 12226122

ER -

TY - JOUR

ID - 376

T1 - Profiles of social competence among low-income African American preschool children

A1 - Mendez,J.L.

A1 - Fantuzzo,J.

A1 - Cicchetti,D.

Y1 - 2002/07//

N1 - Mendez, Julia L. Fantuzzo, John. Cicchetti, Dante

Child development

0372725, d28

IM

Journal Article. Research Support, U.S. Gov't, P.H.S.

English

KW - Medline

KW - African Americans/px [Psychology]

KW - Attention Deficit and Disruptive Behavior Disorders/di [Diagnosis]

KW - Attention Deficit and Disruptive Behavior Disorders/px [Psychology]

KW - Child

KW - Preschool

KW - Early Intervention (Education)

KW - Female

KW - Humans

KW - Language Development

KW - Male

KW - Peer Group

KW - Play and Playthings

KW - Poverty/px [Psychology]

KW - Risk Factors

KW - Social Behavior

KW - SOCIALIZATION

KW - Vocabulary

RP - NOT IN FILE

SP - 1085

EP - 1100

JF - Child Development

JA - Child Dev.

VL - 73

IS - 4

CY - United States

N2 - Relations between children's personal attributes and peer play competence were investigated in a sample of 141 African American preschool children who participated in Head Start. Variable-oriented analyses confirmed that dispositions of temperament, emotion regulation, autonomy, and language were related to children's peer play competence in the classroom. Person-oriented analyses revealed distinctive profiles of personal attributes linked to adaptive preschool social functioning. A small group of resilient children whose profile was characterized by highly adaptable temperament, ability to approach new situations, and above average vocabulary development evidenced the greatest social competence with peers. Children who were disruptive with peers were equally divided between two profiles characterized by inattention and activity, but with differential performance on vocabulary tasks. A profile containing calm, reticent children was the group

least likely to engage in disruptive peer play. Inspection of the six profiles revealed the within-group variability for this economically disadvantaged sample and illustrated the differential importance of temperament, regulation, and language constructs. Findings from the profile analyses and relations with peer competence inform the study of resilience in social development for urban African American children who participate in early intervention preschool programs

SN - 0009-3920

AD - Department of Psychology, University of South Carolina, Columbia 29208, USA. mendez@sc.edu

UR - 12146735

ER -

TY - JOUR

ID - 377

T1 - Child safety. Getting the playground ready for spring...and a good resource for playground safety materials

A1 - Ucci,M.

Y1 - 2002/04//

N1 - Ucci, Mary

Child health alert

9881972

K

Journal Article

English

KW - Medline

KW - Child

KW - Humans

KW - Play and Playthings

KW - Safety

KW - United States

RP - NOT IN FILE

SP - 5

JF - Child Health Alert

VL - 20

CY - United States

SN - 1064-4849

UR - 12143776

ER -

TY - JOUR

ID - 378

T1 - Childhood social arena and cognitive sets in eating disorders

A1 - Troop,N.A.

A1 - Bifulco,A.

Y1 - 2002/06//

N1 - Troop, Nicholas A. Bifulco, Antonia

The British journal of clinical psychology / the British Psychological Society

bok, 8105533

IM

Journal Article

English

KW - Medline

KW - Adolescent

KW - Adult

KW - Anorexia Nervosa/px [Psychology]

KW - Attitude

KW - Bulimia/px [Psychology]

KW - Child

KW - Female

KW - Humans  
KW - Personality Development  
KW - Risk Factors  
KW - Social Adjustment  
KW - Social Environment  
RP - NOT IN FILE  
SP - 205  
EP - 211  
JF - British Journal of Clinical Psychology  
JA - Br J Clin.Psychol.  
VL - 41  
IS - Pt 2  
CY - England

N2 - **OBJECTIVE:** While there is much evidence to suggest that women with eating disorders experience difficulties in the social domain, little has been done to establish whether such difficulties play a causal role or the extent to which these involve cognitive factors. The purpose of this report is to determine whether difficulties in certain aspects of the childhood social arena are reported as existing prior to developing an eating disorder. **METHOD:** A sample of 43 women with a history of eating disorders and 20 women with no such history were interviewed retrospectively about their feelings and experiences of loneliness, shyness and inferiority in childhood and adolescence. **RESULTS:** Women with a history of anorexia nervosa of the binge/purge subtype reported higher levels of loneliness, shyness and feelings of inferiority in adolescence than did women with no history of an eating disorder, and women with a history of bulimia nervosa reported higher levels of shyness. However, this was not true for earlier childhood where such feelings did not differ significantly between groups. This difference could not be accounted for by current depressive disorder, recovery from the eating disorder or level of victimization in adolescence. **CONCLUSION:** There are a number of differences in the aetiology of subtypes of eating disorder. The present results suggest that cognitive styles pertaining to the social arena in adolescence, and prior to the onset of any eating disorders, may play a causal role in the development of anorexia nervosa of the binge/purge subtype, but not anorexia nervosa of the restricting subtype

SN - 0144-6657  
AD - Department of Psychology, London Guildhall University, London, UK. ntroop@lgu.ac.uk  
UR - 12034006  
ER -

TY - JOUR  
ID - 379  
T1 - Teaching firearm safety to children: failure of a program  
A1 - Hardy,M.S.  
Y1 - 2002/04//  
N1 - Hardy, Marjorie S  
Journal of developmental and behavioral pediatrics : JDBP  
htf, 8006933  
IM  
Clinical Trial. Journal Article. Randomized Controlled Trial  
English  
KW - Medline  
KW - Aggression/px [Psychology]  
KW - Child  
KW - Preschool  
KW - Female  
KW - Firearms  
KW - Health Education  
KW - Health Knowledge  
KW - Attitudes  
KW - Practice  
KW - Humans

KW - Male  
KW - Parent-Child Relations  
KW - Play and Playthings  
KW - Program Evaluation  
KW - Safety  
KW - Wounds  
KW - Gunshot/pc [Prevention & Control]  
KW - Gunshot/px [Psychology]  
RP - NOT IN FILE  
SP - 71  
EP - 76  
JF - Journal of Developmental & Behavioral Pediatrics  
JA - J Dev.Behav Pediatr  
VL - 23  
IS - 2  
CY - United States  
N2 - The present study investigated the effectiveness of a skills-based firearm safety program on reducing children's play with firearms. In a randomized control study, 34 children aged 4 to 7 years participated in a week-long firearm safety program; the Control Group was composed of 36 children. After the program, pairs of children were observed playing in a structured setting in which they had access to a semiautomatic pistol. A total of 53% of the pairs played with the gun, and there was no difference in gun-play behavior between those children who did and did not receive the intervention. Interview data revealed significant discrepancies in parent and child reports of parental gun ownership and inaccurate parental predictions of their children's interest in guns. The results of the current study cast doubt on the potential effectiveness of skills-based gun safety programs for children  
SN - 0196-206X  
AD - Department of Psychology, Eckerd College, St. Petersburg, Florida 33711, USA. hardyms.eckerd.edu  
UR - 11943968  
ER -  
  
TY - JOUR  
ID - 380  
T1 - Decreasing children's risk taking on the playground  
A1 - Heck,A.  
A1 - Collins,J.  
A1 - Peterson,L.  
Y1 - 2001///  
N1 - Heck, A. Collins, J. Peterson, L  
Journal of applied behavior analysis  
0174763, hdr  
IM  
Journal Article. Research Support, Non-U.S. Gov't. Research Support, U.S. Gov't, P.H.S.  
English  
KW - Medline  
KW - Child  
KW - Humans  
KW - Play and Playthings  
KW - Random Allocation  
KW - Risk-Taking  
KW - Teaching  
KW - Wounds and Injuries/pc [Prevention & Control]  
RP - NOT IN FILE  
SP - 349  
EP - 352  
JF - Journal of Applied Behavior Analysis  
JA - J Appl.Behav Anal.

VL - 34

IS - 3

CY - United States

N2 - Playground mishaps are some of the most common sources of injury and are the leading killer of children. The present study used a multiple baseline design across three classrooms (N = 379 children). With minimal teaching and rewards, children decreased and maintained decreased risky playground behaviors on slides. Floor effects on climbers prevented the demonstration of similar effects. The decreases seen in risky slide behavior are discussed within the context of preventive safety training for playground injuries

SN - 0021-8855

AD - University of Missouri-Columbia, 65211, USA

UR - 11678532

ER -

TY - JOUR

ID - 381

T1 - Planar asymmetry tips the phonological playground and environment raises the bar

A1 - Eckert, M.A.

A1 - Lombardino, L.J.

A1 - Leonard, C.M.

Y1 - 2001/07//

N1 - Eckert, M A. Lombardino, L J. Leonard, C M

Child development

0372725, d28

IM

Journal Article. Research Support, Non-U.S. Gov't. Research Support, U.S. Gov't, P.H.S.

English

KW - Medline

KW - Brain Mapping

KW - Child

KW - Dominance

KW - Cerebral/ph [Physiology]

KW - Dyslexia/ge [Genetics]

KW - Dyslexia/pp [Physiopathology]

KW - Female

KW - Humans

KW - Intelligence/ge [Genetics]

KW - Intelligence/ph [Physiology]

KW - Longitudinal Studies

KW - Magnetic Resonance Imaging

KW - Male

KW - Phonetics

KW - Play and Playthings

KW - Reading

KW - Risk Factors

KW - Social Environment

KW - Socioeconomic Factors

KW - Temporal Lobe/pp [Physiopathology]

RP - NOT IN FILE

SP - 988

EP - 1002

JF - Child Development

JA - Child Dev.

VL - 72

IS - 4

CY - United States

N2 - Reading readiness varies as a function of family and environmental variables. This study of 11-year-old children (N = 39) was designed to determine if there was an additional or interactive contribution of brain structure. Evidence is presented that both environmental and biological variables predict phonological development. Temporal lobe (planar) asymmetry, hand preference, family history of reading disability, and SES explained over half of the variance in phonological and verbal performance. The results demonstrate a linear association between cerebral organization and phonological skill within socioeconomic groups. These data provide concrete evidence to support the commonly held assumption that both environmental and biological factors are independent determinants of a child's ability to process linguistic information

SN - 0009-3920

AD - Department of Neuroscience, McKnight Brain Institute, University of Florida, Gainesville 32610, USA.  
eckert@ufl.edu

UR - 11480950

ER -

TY - JOUR

ID - 382

T1 - Return to play after cervical spine injury

A1 - Morganti,C.

A1 - Sweeney,C.A.

A1 - Albanese,S.A.

A1 - Burak,C.

A1 - Hosea,T.

A1 - Connolly,P.J.

Y1 - 2001/05/15/

N1 - Morganti, C. Sweeney, C A. Albanese, S A. Burak, C. Hosea, T. Connolly, P J

Spine

7610646, uxk, 7610649

IM

Journal Article

English

KW - Medline

KW - Adolescent

KW - Adult

KW - Athletic Injuries/pp [Physiopathology]

KW - Athletic Injuries/px [Psychology]

KW - Athletic Injuries/th [Therapy]

KW - Cervical Vertebrae/in [Injuries]

KW - Child

KW - Decision Making

KW - Humans

KW - Medicine

KW - Physicians

KW - Postoperative Period

KW - Practice Guidelines as Topic

KW - Professional Practice

KW - Questionnaires

KW - Risk Factors

KW - Specialization

KW - Sports

KW - Time Factors

RP - NOT IN FILE

SP - 1131

EP - 1136

JF - Spine

VL - 26

IS - 10

CY - United States

N2 - **STUDY DESIGN:** A questionnaire survey was mailed to members of the Cervical Spine Research Society, the Herodius Sports Medicine Society, and to members of the authors' Department of Orthopaedics. **OBJECTIVES:** The purpose of our study was to evaluate what influence, if any, factors such as published guidelines, type of sport of the patient, number of years in practice, subspecialty interest, and sports participation of the respondent held in the "return to play" decision-making process after a cervical spine injury. **SUMMARY OF BACKGROUND DATA:** The consequences of cervical spine injury are potentially catastrophic, and return to play decisions in athletes with a history of neck injury can be agonizing. Although recent publications have addressed some of the concerns regarding cervical spine injuries in the athletic population, many questions remain unanswered. Factors such as published guidelines, type of sport of the patient, number of years in practice, subspecialty interest, and sports participation of the respondent have all been suggested as having a possible role in return to play decisions. **METHODS:** Representative radiographs and case histories of 10 athletes who had sustained neck injury were mailed to 346 physicians. For each case physicians selected every type of play (of six categories) that they felt comfortable recommending. Type of play was divided into six categories: Type 1, collision sports; Type 2, contact sports; Type 3, noncontact, high velocity sports; Type 4, noncontact, repetitive load sports (e.g., running); Type 5, noncontact, low impact sports; Type 6, no sports. In addition, demographic data regarding board certification, subspecialty interest, number of years in practice, use of guidelines in return to play decisions, and personal participation in sports were queried from all respondents. Statistical analysis was completed with Statview (Berkeley, CA). Basic descriptive statistics, chi2, and ANOVA were used where appropriate. **RESULTS:** Three hundred forty-six questionnaires were mailed and 113 were returned (response rate 32.7%). One hundred ten (97%) of the respondents who completed the questionnaire were board certified. Seventy-five were subspecialists in spine, 22 were subspecialists in sportsmedicine, and 13 reported interests in both sports medicine and spine. Use of Published Guidelines. Although 49% of respondents reported using guidelines in decision-making, the use of guidelines was statistically significant in only one case ( $P = 0.04$ ). Hierarchy of Risk. In general, those physicians who participated in the study followed the hierarchy of risk that we established in this study (Type 1 [collision sports; highest level of risk] through Type 6 [no sports; lowest level of risk]). Twelve (10.6%) respondents, however, deviated from it in one or more cases. Years in Practice. In three cases there was a statistically significant association between the number of years a physician was in practice and the type of play selected ( $P < 0.05$ ). In each case a lower level of play tended to be recommended by more senior physicians. Subspecialty Interest. In three cases those respondents with a spine subspecialty interest recommended returned to a higher level of play ( $P < 0.05$ ). **CONCLUSIONS:** There is no consensus on the postinjury management of many cervical spine-injured patients. Further research, education, and discussion on this topic are needed

SN - 0362-2436

AD - Department of Orthopedic Surgery, State University of New York, Upstate Medical University, Syracuse, New York 13202, USA

UR - 11413424

ER -

TY - JOUR

ID - 383

T1 - Seeing is believing: what do boys do when they find a real gun?

A1 - Jackman,G.A.

A1 - Farah,M.M.

A1 - Kellermann,A.L.

A1 - Simon,H.K.

Y1 - 2001/06//

N1 - Jackman, G A. Farah, M M. Kellermann, A L. Simon, H K

Pediatrics

oxv, 0376422

AIM, IM

Journal Article. Research Support, Non-U.S. Gov't

English

KW - Medline

KW - Adult

KW - Age Factors

KW - Attitude  
 KW - Child  
 KW - Child Behavior/px [Psychology]  
 KW - Exploratory Behavior  
 KW - Female  
 KW - Firearms/st [Standards]  
 KW - Firearms  
 KW - Humans  
 KW - Male  
 KW - Parent-Child Relations  
 KW - Parents/ed [Education]  
 KW - Parents/px [Psychology]  
 KW - Play and Playthings/px [Psychology]  
 KW - Safety/st [Standards]  
 KW - Sampling Studies  
 KW - Sex Factors  
 RP - NOT IN FILE  
 SP - 1247  
 EP - 1250  
 JA - Pediatrics  
 VL - 107  
 IS - 6  
 CY - United States

**N2 - OBJECTIVES:** To determine how boys behave when they find a handgun in a presumably safe environment and to compare parental expectations of their child's interest in real guns with this observed behavior. **METHODS:** A convenience sample of 8- to 12-year-old boys was recruited from families that completed a survey on firearm ownership, storage practices, and parental perceptions. Parents were asked to rate their child's interest in real guns on a scale from 1 to 5: 1-2 = low interest, 3 = moderate interest, and 4-5 = high interest. Parents of an eligible child were asked to bring to the exercise 1 of their son's playmates and/or a sibling in the same age range. After informed parental consent was obtained, each pair or trio of boys was placed in a room with a 1-way mirror and observed for up to 15 minutes. Two water pistols and an actual .380 caliber handgun were concealed in separate drawers. The handgun contained a radio transmitter that activated a light whenever the trigger was depressed with sufficient force to discharge the firearm. After the exercise, each boy was asked whether he thought that the pistol was real or a toy. Before leaving, each child was counseled about safe behavior around guns. **RESULTS:** Twenty-nine groups of boys (n = 64) took part in the study. The mean age of participants was 9.8 years. Twenty-one of the groups (72%) discovered the handgun (n = 48 boys); 16 groups (76%) handled it (n = 30 boys). One or more members in 10 of the groups (48%) pulled the trigger (n = 16 boys). Approximately half of the 48 boys who found the gun thought that it was a toy or were unsure whether it was real. Parental estimates of their child's interest in guns did not predict actual behavior on finding the handgun. Boys who were believed to have a low interest in real guns were as likely to handle the handgun or pull the trigger as boys who were perceived to have a moderate or high interest in guns. More than 90% of the boys who handled the gun or pulled the trigger reported that they had previously received some sort of gun safety instruction. **CONCLUSION:** Many 8- to 12-year-old boys will handle a handgun if they find one. Guns that are kept in homes should be stored in a manner that renders them inaccessible to children. guns, weapons, firearms, children, childhood behavior, injury prevention

SN - 1098-4275

AD - Division of Pediatric Emergency Medicine, Department of Pediatrics, Emory University School of Medicine and the Children's Healthcare of Atlanta, Atlanta, Georgia, USA. geoffrey.jackman@hsc.utah.edu

UR - 11389238

ER -

TY - JOUR

ID - 384

T1 - Playground injuries in children: a review and Pennsylvania Trauma Center experience. [Review] [23 refs]

A1 - Bernardo,L.M.

A1 - Gardner,M.J.



A1 - Seibel,K.  
Y1 - 2001/01//  
N1 - Bernardo, L M. Gardner, M J. Seibel, K  
Journal of the Society of Pediatric Nurses : JSPN  
cky, 9615684  
IM, N  
Journal Article. Review  
English  
KW - Medline  
KW - Accidental Falls/sn [Statistics & Numerical Data]  
KW - Child  
KW - Child Welfare  
KW - Preschool  
KW - Female  
KW - Humans  
KW - Length of Stay/sn [Statistics & Numerical Data]  
KW - Male  
KW - Patient Education as Topic  
KW - Pediatric Nursing  
KW - Pennsylvania/ep [Epidemiology]  
KW - Play and Playthings/in [Injuries]  
KW - Population Surveillance  
KW - Primary Prevention  
KW - Registries  
KW - Retrospective Studies  
KW - Risk Factors  
KW - Safety Management  
KW - Seasons  
KW - Time Factors  
KW - Trauma Centers/sn [Statistics & Numerical Data]  
KW - Wounds and Injuries/ep [Epidemiology]  
KW - Wounds and Injuries/et [Etiology]  
KW - Wounds and Injuries/pc [Prevention & Control]  
RP - NOT IN FILE  
SP - 11  
EP - 20  
JF - Journal of the Society of Pediatric Nurses  
JA - J Soc Pediatr Nurs  
VL - 6  
IS - 1  
CY - United States  
N2 - ISSUES AND PURPOSE: To describe patient demographics, injury characteristics, and circumstances of playground injuries in children admitted to Pennsylvania trauma centers and to identify injury prevention strategies. DESIGN AND METHODS: Retrospective, descriptive study of 234 children ages 1 to 18 years sustaining playground-related injuries and whose hospital data were entered into the Pennsylvania Trauma Outcome Study. RESULTS: Most of the injuries occurred between April and September (77%), and noon to 6 P.M. (69%). Falls from playground equipment constituted the highest proportion of incidents (73%). Of 421 injuries (M = 1.8/patient), most were upper extremity (n = 117) and head (n = 110) injuries. PRACTICE IMPLICATIONS: Nurses can advocate for playground safety by teaching children to play safely and recommending age-appropriate equipment and protective surfacing. [References: 23]  
SN - 1088-145X  
AD - School of Nursing, University of Pittsburgh, PA, USA  
UR - 11288499  
ER -  
TY - JOUR

ID - 385

T1 - Maternal attachment and sensitivity in an at-risk sample

A1 - Oyen,A.S.

A1 - Landy,S.

A1 - Hilburn-Cobb,C.

Y1 - 2000/09//

N1 - Oyen, A S. Landy, S. Hilburn-Cobb, C

Attachment &amp; human development

100901315

IM

Journal Article

English

KW - Medline

KW - Adult

KW - Child

KW - Preschool

KW - Female

KW - Humans

KW - Infant

KW - Male

KW - Maternal Behavior

KW - Mother-Child Relations

KW - Object Attachment

KW - Ontario

KW - Personality Assessment

KW - Personality Development

KW - Play and Playthings

KW - Risk Factors

KW - Social Welfare

KW - Urban Population

RP - NOT IN FILE

SP - 203

EP - 217

JF - Attachment &amp; Human Development

JA - Attach.Hum.Dev.

VL - 2

IS - 2

CY - England

N2 - This study investigated the relationship between adult attachment status and maternal sensitivity in a sample of 30 at-risk mother-child dyads. The children were 18-42 months old with an equal distribution of boys and girls that were at risk for compromised development due to a number of social, emotional and environmental factors. Using the Adult Attachment Interview (AAI; George, Kaplan, & Main, 1985) it was found that only 17% of the mothers were classified as autonomous, while 83% were classified as anxious regarding attachment. Sensitivity was measured using the Emotional Availability Scales (EAS) (Biringen, Robinson, & Emde, 1993). Each mother-child pair was video-taped in their home during a 30-minute interactional sequence in which they played with a given set of toys. Only the results from the Maternal Sensitivity Scale are reported here. Mothers who were free to evaluate their attachment experiences on the AAI were most sensitive. Mothers who showed anxiety in evaluating attachment, as a group, while undoubtedly caring and concerned, were less sensitive. There was, however, wide variability within the group of mothers with anxious attachment representations, Preoccupied mothers showing the least optimal interactions

SN - 1461-6734

AD - Barne- og ungdomspsykiatrisk avdeling (BUPA), Ullevaal sykehus, 0407 Oslo, Norway.

asoyen@online.no

UR - 11707911

ER -

TY - JOUR

ID - 386

T1 - Maternal substance use during pregnancy and developmental outcome at age three

A1 - Faden, V.B.

A1 - Graubard, B.I.

Y1 - 2000///

N1 - Faden, V B. Graubard, B I

Journal of substance abuse

bjp, 9001404

IM

Journal Article

English

KW - Medline

KW - Cannabinoids/ae [Adverse Effects]

KW - Child

KW - Preschool

KW - Developmental Disabilities/di [Diagnosis]

KW - Developmental Disabilities/et [Etiology]

KW - Female

KW - Fetal Alcohol Syndrome/di [Diagnosis]

KW - Fetal Alcohol Syndrome/et [Etiology]

KW - Follow-Up Studies

KW - Humans

KW - Infant

KW - Newborn

KW - Logistic Models

KW - Male

KW - Personality Assessment

KW - Pregnancy

KW - Prenatal Exposure Delayed Effects

KW - Risk Factors

KW - Smoking/ae [Adverse Effects]

RP - NOT IN FILE

SP - 329

EP - 340

JF - Journal of Substance Abuse

JA - J Subst Abuse

VL - 12

IS - 4

CY - United States

N2 - **PURPOSE:** The data from the National Maternal and Infant Health Survey (NMIHS) and its 3-year follow-up offer a unique opportunity to study the effects of substance (alcohol, marijuana, and tobacco) use during gestation on development at age three in a nationally representative sample. Using this data, the relationship of development (language, gross motor, fine motor, and adaptive behavior) and specific behaviors (eating problems, length of play, activity level, difficulty of management, level of happiness, fearfulness, ability to get along with peers, tantrums, eating nonfood) and maternal drinking, marijuana use, and cigarette smoking was studied in a sample of live births who had been followed up at age three. **METHODS:** The data were analyzed using a cumulative logit model of ordinal responses. **RESULTS:** Higher activity level, greater difficulty of management, tantrums, eating problems, and eating nonfood were related to maternal drinking during pregnancy. Increased fearfulness, poorer motor skills, and shorter length of play were associated with maternal marijuana use during pregnancy. Less well developed language, higher activity level, greater difficulty of management, fearfulness, decreased ability to get along with peers, and increased tantrums were associated with maternal cigarette smoking during pregnancy. The preponderance of significant effects involved the behaviors studied rather than the developmental indices. **IMPLICATIONS:** It may be that the effects of substance use during pregnancy, especially more subtle ones, show up in behavior before they can be measured by developmental scales

SN - 0899-3289

AD - Division of Biometry and Epidemiology, National Institute on Alcohol Abuse and Alcoholism, 6000 Executive Boulevard, Bethesda, MD 20892, USA. vfaden@willco.niaaa.nih.gov

UR - 11452837

ER -

TY - JOUR

ID - 387

T1 - Clinical trials. Enforcers halt NIH study called less risky than outdoor play

A1 - Marshall,E.

Y1 - 2000/11/17/

N1 - Marshall, E

Science (New York, N.Y.)

0404511, uj7

IM

News

English

KW - Medline

KW - Child

KW - Clinical Trials as Topic

KW - Glucose Clamp Technique

KW - Humans

KW - National Institutes of Health (U.S.)

KW - Obesity/me [Metabolism]

KW - Risk

KW - United States

RP - NOT IN FILE

SP - 1281

JF - Science

VL - 290

IS - 5495

CY - UNITED STATES

N2 - How much risk should healthy children face in a research experiment? The answer can land even the best clinicians in hot water, especially if they read the rules differently from the government officials who must enforce them

SN - 0036-8075

UR - 11185397

ER -

TY - JOUR

ID - 388

T1 - [Physical activity in children]. [Review] [9 refs] [Japanese]

A1 - Okada,T.

A1 - Shimomitsu,K.

Y1 - 2000/09//

N1 - Okada, T. Shimomitsu, K

Nihon rinsho. Japanese journal of clinical medicine

kim, 0420546

IM

Journal Article. Review

Japanese

KW - Medline

KW - Adolescent

KW - Child

KW - Child Development

KW - Preschool

KW - Coronary Disease/pc [Prevention & Control]  
KW - Exercise/ph [Physiology]  
KW - Humans  
KW - Obesity/pc [Prevention & Control]  
KW - Play and Playthings  
KW - Risk  
RP - NOT IN FILE  
SP - 290  
EP - 293  
JF - Nippon Rinsho - Japanese Journal of Clinical Medicine  
JA - Nippon Rinsho  
VL - 58 Suppl  
CY - JAPAN  
SN - 0047-1852  
AD - Department of Pediatrics, Nihon University School of Medicine  
UR - 11085130  
ER -

TY - JOUR  
ID - 389  
T1 - Ocular injuries by elastic cords in children  
A1 - Da,Pozzo S.  
A1 - Pensiero,S.  
A1 - Perissutti,P.  
Y1 - 2000/11//  
N1 - Da Pozzo, S. Pensiero, S. Perissutti, P  
Pediatrics  
oxv, 0376422  
IM  
Journal Article  
English  
KW - Medline  
KW - Adult  
KW - Age Factors  
KW - Child  
KW - Child Behavior  
KW - Elastomers/ae [Adverse Effects]  
KW - Eye Injuries/ep [Epidemiology]  
KW - Eye Injuries/et [Etiology]  
KW - Eye Injuries/pc [Prevention & Control]  
KW - Follow-Up Studies  
KW - Hospitalization  
KW - Humans  
KW - Play and Playthings/in [Injuries]  
KW - Primary Prevention  
KW - Retinal Detachment/et [Etiology]  
KW - Transportation/is [Instrumentation]  
KW - Transportation/mt [Methods]  
KW - Trauma Severity Indices  
KW - Visual Acuity  
KW - Wounds  
KW - Nonpenetrating/ep [Epidemiology]  
KW - Nonpenetrating/et [Etiology]  
KW - Nonpenetrating/pc [Prevention & Control]  
RP - NOT IN FILE  
SP - E65

JA - Pediatrics

VL - 106

IS - 5

CY - UNITED STATES

N2 - **BACKGROUND:** Elastic cords hitting the eyeball as high-speed projectiles can severely damage ocular structures and can produce permanent visual function impairment. **OBJECTIVES:** To evaluate the frequency, mechanics, and severity of eye injuries caused by elastic cords in children to adopt the most appropriate preventive measures. **METHODS:** A retrospective medical records review of hospital admissions secondary to ocular trauma between 1991 and 1997 in a pediatric ophthalmology unit at an urban tertiary care pediatric hospital was performed to select all children admitted for ocular injury caused by an elastic cord. **RESULTS:** Eight children fulfilled the inclusion criteria; the prevalence ratio was 2% of all pediatric trauma admissions. In all cases the mechanics of trauma was a combination of blunt and high-speed projectile injury. The mechanism of trauma in younger patients was typically a cord that was misused during unsupervised playtime, whereas cord slipping from car roof racks was noted in older patients. One patient suffered a severe permanent visual impairment caused by retinal detachment. All other children regained full visual acuity at the time of discharge and maintained it through a mean follow-up of 22 months (range: 18-29). **CONCLUSION:** Circumstances of injury in younger children are different from those found in older children, the latter being similar to those reported for adults. Prevention is the primary measure to be taken to reduce the prevalence of this injury and to lower the risk for ocular severe anatomic damage as much as possible. This can be achieved primarily by modifying the design of the hooks, intensifying educational campaigns, and keeping elastic cords out of children's reach

SN - 1098-4275

AD - Ophthalmology Unit, Children's Hospital, Trieste, Italy. dapozzo@onenet.it

UR - 11061802

ER -

TY - JOUR

ID - 390

T1 - Physicians play an important role in helping to eliminate childhood lead poisoning

A1 - Tillman,U.J.

Y1 - 2000/08//

N1 - Tillman, U J

Delaware medical journal

e0b, 0370077

IM

Journal Article

English

KW - Medline

KW - Child

KW - Preschool

KW - Delaware

KW - Female

KW - Guidelines as Topic

KW - Humans

KW - Lead Poisoning/pc [Prevention & Control]

KW - Male

KW - Mass Screening/st [Standards]

KW - Physician's Role

KW - Risk Factors

RP - NOT IN FILE

SP - 357

EP - 360

JF - Delaware Medical Journal

JA - Del.Med J

VL - 72

IS - 8

CY - UNITED STATES

SN - 0011-7781

AD - Division of Public Health, Delaware Health and Social Services, USA

UR - 10984979

ER -

TY - JOUR

ID - 391

T1 - Gender-specific characteristics of 5-year-olds' play narratives and associations with behavior ratings

A1 - von,Klitzing K.

A1 - Kelsay,K.

A1 - Emde,R.N.

A1 - Robinson,J.

A1 - Schmitz,S.

Y1 - 2000/08//

N1 - von Klitzing, K. Kelsay, K. Emde, R N. Robinson, J. Schmitz, S

Journal of the American Academy of Child and Adolescent Psychiatry

hg5, 8704565

IM

Comparative Study. Journal Article. Research Support, Non-U.S. Gov't. Research Support, U.S. Gov't, P.H.S..

Twin Study

English

KW - Medline

KW - Aggression/px [Psychology]

KW - Child

KW - Child Behavior

KW - Child Behavior Disorders/di [Diagnosis]

KW - Child Behavior Disorders/px [Psychology]

KW - Child Psychology

KW - Preschool

KW - Female

KW - Gender Identity

KW - Humans

KW - Internal-External Control

KW - Male

KW - Projective Techniques

KW - Psychiatric Status Rating Scales

KW - Sex Distribution

RP - NOT IN FILE

SP - 1017

EP - 1023

JF - Journal of the American Academy of Child & Adolescent Psychiatry

JA - J Am Acad.Child Adolesc Psychiatry

VL - 39

IS - 8

CY - UNITED STATES

N2 - OBJECTIVES: To examine the content and structure of children's play narratives in a large sample of 5-year-olds in order to replicate previous findings, explore the role of gender differences, and identify a pattern that can provide useful information about children's behavior. METHOD: The MacArthur Story Stem Battery and coding system was used to code content themes and coherence from play narratives of 652 twins in a nonclinical sample. To measure behavior problems, parents completed the Child Behavior Checklist when their children were aged 5 and 7 years; teachers completed the Teacher's Report Form when the children were aged 7 years. RESULTS: Girls told more coherent narratives with less aggression than boys. Aggressive themes were found to correlate with behavior problems as in previous studies. Upon further examination, this correlation held for girls but not boys. Children who told repeated aggressive/incoherent narratives had more behavior problems than those who did not show this narrative pattern. CONCLUSIONS: The Story Stem methodology is useful for

gaining access into the young child's inner world. The gender of the child, content of the story, and coherence of the story all provide useful information in identifying narratives that may indicate more risk for behavior problems

SN - 0890-8567

AD - Department of Child and Adolescent Psychiatry, University of Basel, Switzerland

UR - 10939230

ER -

TY - JOUR

ID - 392

T1 - Children are dying for some exercise

A1 - Egoscue,P.

Y1 - 2000/06//

N1 - Egoscue, P

Minnesota medicine

nby, 8000173

IM

Editorial

English

KW - Medline

KW - Adolescent

KW - Adult

KW - Athletic Injuries/et [Etiology]

KW - Athletic Injuries/mo [Mortality]

KW - Child

KW - Chronic Disease

KW - Exercise

KW - Female

KW - Humans

KW - Life Style

KW - Male

KW - Pain/et [Etiology]

KW - Play and Playthings

KW - Risk Factors

RP - NOT IN FILE

SP - 42

EP - 44

JF - Minnesota Medicine

JA - Minn.Med

VL - 83

IS - 6

CY - UNITED STATES

SN - 0026-556X

UR - 10881572

ER -

TY - JOUR

ID - 393

T1 - Gender-related behavior during childhood and associations with adult abdominal obesity: a nested case-control study in women

A1 - Rosmond,R.

A1 - Baghei,F.

A1 - Holm,G.

A1 - Bjorntorp,P.

Y1 - 2000/05//



N1 - Rosmond, R. Baghei, F. Holm, G. Bjorntorp, P  
Journal of women's health & gender-based medicine  
dfz, 100888719

IM

Journal Article. Research Support, Non-U.S. Gov't

English

KW - Medline

KW - Abdomen

KW - Adult

KW - Body Composition

KW - Case-Control Studies

KW - Child

KW - Child Behavior

KW - Female

KW - Humans

KW - Hyperandrogenism/ep [Epidemiology]

KW - Male

KW - Obesity/ep [Epidemiology]

KW - Questionnaires

KW - Sex

KW - Sweden/ep [Epidemiology]

KW - Women's Health

RP - NOT IN FILE

SP - 413

EP - 419

JF - Journal of Womens Health & Gender-Based Medicine

JA - J Womens Health Gen.Based Med

VL - 9

IS - 4

CY - UNITED STATES

N2 - Abdominal obesity affects many aspects of women's health, and recent studies indicate that hyperandrogenicity (HA) may contribute to the excess of body fat in women. As hormone behavior research attributes male-like play patterns in childhood to the effects of androgens, the aim of the present study was to assess the potential association of such behavior with obesity in adult women. In a randomly selected sample of 40-year-old women (n = 1464), 78% volunteered to respond to a questionnaire collecting information on the effect of other variables on childhood behavior. Self-reported body weight, height, and waist and hip circumferences were used to calculate body mass index (BMI) and waist/hip ratio (WHR). Age at menarche showed an inverse association with overweight (BMI > or = 25) (odds ratio [OR] = 0.82). Reports of gender-related behavior as a child showed that playing with girls and girl toys was negatively related to both overweight and abdominal obesity (WHR > or = 0.85). Among respondents who were overweight, relationships were found for playing with boys (OR = 0.90) and fighting (OR = 1.70). The OR of playing with boy toys and fighting among respondents with abdominal obesity were increased 1.12 and 1.65, respectively. Interests in athletics as a child seemed to decrease the risk for overweight (OR = 0.89) and abdominal obesity (OR = 0.91). Furthermore, dose-response analysis between the individual exposure levels and the OR for overweight showed a negative trend for playing with girls (p = 0.002) and girl toys (p = 0.017) and a positive trend for playing with boys (p = 0.011) and fighting (p = 0.031). Among respondents with abdominal obesity, positive dose-response effects were found for playing with boys (p = 0.026) and boy toys (p = 0.036) and fighting (p = 0.008). Thus, women with an elevated WHR showed a preference to play with boys and boy toys and also fought frequently as children. This might be a sign of a relative HA in childhood ("tomboyism"). These preliminary observations suggest that HA may originate in childhood

SN - 1524-6094

AD - Institute of Heart and Lung Diseases, Department of Cardiovascular Prevention, Sahlgrenska University Hospital, Goteborg, Sweden

UR - 10868614

ER -

TY - JOUR

ID - 394

T1 - Mothers' responses to sons and daughters engaging in injury-risk behaviors on a playground: implications for sex differences in injury rates

A1 - Morrongiello, B.A.

A1 - Dawber, T.

Y1 - 2000/06//

N1 - Morrongiello, B A. Dawber, T

Journal of experimental child psychology

2985128r, i2n

IM

Journal Article. Research Support, Non-U.S. Gov't

English

KW - Medline

KW - Child

KW - Female

KW - Gender Identity

KW - Humans

KW - Male

KW - Mother-Child Relations

KW - Parenting/px [Psychology]

KW - Play and Playthings

KW - Reinforcement

KW - Verbal

KW - Risk-Taking

KW - SOCIALIZATION

KW - Wounds and Injuries/pc [Prevention & Control]

KW - Wounds and Injuries/px [Psychology]

RP - NOT IN FILE

SP - 89

EP - 103

JF - Journal of Experimental Child Psychology

JA - J Exp. Child Psychol.

VL - 76

IS - 2

CY - UNITED STATES

N2 - Videotapes of children engaging in injury-risk activities on a playground were shown to mothers, who were asked to intervene by stopping the tape and saying whatever they would to their child in the situation shown. Results revealed that mothers of daughters were more likely to judge behaviors as posing some degree of injury risk, and they intervened more frequently and quickly than mothers of sons. Mothers' speed to intervene positively correlated with both children's injury history and their risk-taking tendencies, indicating that mothers of children who were previously injured and who often engaged in injury-risk behaviors had a higher degree of tolerance for children's risk taking than mothers of children who experienced fewer injuries and less frequently engaged in injury-risk behaviors. Mothers' verbalizations to children's risk taking revealed that daughters received more cautions and statements communicating vulnerability for injury, whereas sons received more statements encouraging risk-taking behavior. Copyright 2000 Academic Press

SN - 0022-0965

AD - University of Guelph, Ontario, Canada

UR - 10788304

ER -

TY - JOUR

ID - 395

T1 - The influence of physical activity, socioeconomic status, and ethnicity on the weight status of adolescents

A1 - McMurray, R.G.

A1 - Harrell, J.S.

A1 - Deng,S.

A1 - Bradley,C.B.

A1 - Cox,L.M.

A1 - Bangdiwala,S.I.

Y1 - 2000/03//

N1 - McMurray, R G. Harrell, J S. Deng, S. Bradley, C B. Cox, L M. Bangdiwala, S I

Obesity research

cde, 9305691

IM

Journal Article. Research Support, U.S. Gov't, P.H.S.

English

KW - Medline

KW - Adolescent

KW - African Americans

KW - Body Weight

KW - Child

KW - Ethnic Groups

KW - European Continental Ancestry Group

KW - Exercise

KW - Female

KW - Humans

KW - Logistic Models

KW - Male

KW - Rural Population

KW - Sex Characteristics

KW - Socioeconomic Factors

KW - Television

KW - Urban Population

KW - Video Games

RP - NOT IN FILE

SP - 130

EP - 139

JF - Obesity Research

JA - Obes.Res.

VL - 8

IS - 2

CY - UNITED STATES

N2 - **OBJECTIVE:** This study examined the effects of physical activity, television viewing, video game play, socioeconomic status (SES), and ethnicity on body mass index (BMI). **RESEARCH METHODS AND**

**PROCEDURES:** The sample was 2389 adolescents, 10 to 16 years of age (12.7 +/- 1.0 years); 1240 (52%) females and 1149 (48%) males; 77% white and 23% African American; from rural (77%) and urban (23%) settings. BMI and skinfolds were directly assessed. All other data were obtained from questionnaires.

**RESULTS:** Watching television on non-school days was related to being overweight ( $p < 0.005$ ). However, when BMI analyses were adjusted for ethnicity and SES, there were no significant effects of television viewing on BMI ( $p > 0.061$ ). Increased hours of video game play enhanced the risk of being overweight for both genders when analyses were adjusted for ethnicity and SES ( $p < 0.019$ ). In males, participation in as little as one high-intensity physical activity 3 to 5 days a week decreased the ethnic- and SES-adjusted relative risk of being overweight (RR = 0.646; CI: 0.427 to 0.977). For females, the ethnic- and SES-adjusted relative risk for being overweight was not significantly altered by physical activity. The logistic analyses further indicated the influence of low SES and African American ethnicity overshadowed any direct effect of television or videos.

**DISCUSSION:** Because weight status of male adolescents appears to be more related to exercise habits than to television or video game habits, increased participation in high-intensity exercise appears to be important. For females, neither videos nor exercise habits appear to be related to risk of being overweight. However, ethnicity and SES may be important factors that can influence body weight status, while television viewing may be of some importance. Thus, programs to reduce obesity in female adolescent should focus their efforts in lower SES communities

SN - 1071-7323

AD - Department of Exercise and Sport Science, University of North Carolina, Chapel Hill 27599-8700, USA.  
exphys@email.unc.edu

UR - 10757199

ER -

TY - JOUR

ID - 396

T1 - "Troo, the Traumaroo" bicycle and playground safety program: a pilot study of kindergarten through second graders in the southwest

A1 - Knight-Bohnhoff,K.

A1 - Smith,J.

A1 - Deis,J.

A1 - Chavez,Y.

A1 - Horne-Lucero,L.

Y1 - 1999/04//

N1 - Knight-Bohnhoff, K. Smith, J. Deis, J. Chavez, Y. Horne-Lucero, L

Journal of trauma nursing : the official journal of the Society of Trauma Nurses  
cfl, 9512997, 9512997

N

Journal Article. Research Support, Non-U.S. Gov't

English

KW - Medline

KW - Bicycling/in [Injuries]

KW - Child

KW - Preschool

KW - Health Education/og [Organization & Administration]

KW - Health Knowledge

KW - Attitudes

KW - Practice

KW - Humans

KW - Pilot Projects

KW - Play and Playthings

KW - Program Evaluation

KW - Safety Management/og [Organization & Administration]

KW - School Health Services/og [Organization & Administration]

KW - Southwestern United States

RP - NOT IN FILE

SP - 28

EP - 36

JF - Journal of Trauma Nursing

JA - J Trauma Nurs

VL - 6

IS - 2

CY - UNITED STATES

N2 - "Troo, the Traumaroo" bicycle and playground safety education program created for kindergarten, first, and second grade students, was provided to a convenience sample of seven elementary schools in a Southwestern city. Favorable principal, classroom teacher, and school nurse evaluations indicated that the "Troo, the Traumaroo" program was successful in providing young children with bicycle and playground safety in a fun and entertaining way. Results of this pilot study indicated that kindergarten children pre-tested for bicycle safety knowledge prior to participating in the program, had significantly higher bicycle safety knowledge scores 30 days after participating in the program ( $p < .0001$ )

SN - 1078-7496

AD - Troo, the Traumaroo Bicycle and Playground Safety Program, Albuquerque, N.M., USA

UR - 10524047

ER -

TY - JOUR

ID - 397

T1 - [Documentation of the effects of child cap pistols]. [German]

A1 - Fleischer,G.

A1 - Hoffmann,E.

A1 - Lang,R.

A1 - Muller,R.

Y1 - 1999/06//

N1 - Fleischer, G. Hoffmann, E. Lang, R. Muller, R

HNO

g9p, 2985099r

IM

English Abstract. Journal Article. Research Support, Non-U.S. Gov't

German

KW - Medline

KW - Audiometry

KW - Pure-Tone

KW - Auditory Threshold

KW - Child

KW - Female

KW - Firearms

KW - Germany

KW - Hearing Loss

KW - Noise-Induced/di [Diagnosis]

KW - Noise-Induced/et [Etiology]

KW - Humans

KW - Male

KW - Play and Playthings

KW - Risk Factors

KW - Tinnitus/di [Diagnosis]

KW - Tinnitus/et [Etiology]

RP - NOT IN FILE

SP - 535

EP - 540

JF - HNO

VL - 47

IS - 6

CY - GERMANY

N2 - The study presents an analysis of 20 cases of acute acoustic trauma caused by toy pistols. The problem generally involves boys within the age range from 6 to 11 years. Half of the incidents involved attacks with toy pistols used as weapons. Auditory damage appeared in two types, each of which had a notch in the audiogram at the frequency range between 10 and 14 kHz. In children, a shot close to one ear can damage both ears. Great differences in the severity of tinnitus were apparent. The most severe cases of tinnitus were observed in the children with no or minor permanent auditory damage. Children experiencing long periods of uninterrupted tinnitus suffer significantly. This is not only detrimental to family life, but also to the performance of the children at school. The total expenses of treatment for these 20 cases were estimated to be approximately 80,000 DM (40,000 Euro)

SN - 0017-6192

AD - Arbeitsgruppe Horforschung, Medizinisches Zentrum fur Okologie, Justus-Liebig-Universitat Giessen

UR - 10427522

ER -

TY - JOUR

ID - 398

T1 - Behavioral inhibition in children from families at high risk for developing alcoholism

A1 - Hill,S.Y.

A1 - Lowers,L.

A1 - Locke,J.

A1 - Snidman,N.

A1 - Kagan,J.

Y1 - 1999/04//

N1 - Hill, S Y. Lowers, L. Locke, J. Snidman, N. Kagan, J

Journal of the American Academy of Child and Adolescent Psychiatry

hg5, 8704565

IM

Journal Article. Research Support, U.S. Gov't, P.H.S.

English

KW - Medline

KW - Adult

KW - Alcoholism/di [Diagnosis]

KW - Alcoholism/px [Psychology]

KW - Child

KW - Child Behavior/px [Psychology]

KW - Child Psychology

KW - Child of Impaired Parents/px [Psychology]

KW - Preschool

KW - Female

KW - Humans

KW - Inhibition (Psychology)

KW - Male

KW - Parents/px [Psychology]

KW - Risk Assessment

KW - Temperament

RP - NOT IN FILE

SP - 410

EP - 417

JF - Journal of the American Academy of Child & Adolescent Psychiatry

JA - J Am Acad.Child Adolesc Psychiatry

VL - 38

IS - 4

CY - UNITED STATES

N2 - OBJECTIVE: To determine whether children at risk for the development of adult alcohol dependence would show greater "behavioral inhibition" to the unfamiliar, an early childhood temperament characteristic.

METHOD: One hundred peer play evaluations were conducted blindly with preschool children from families selected to be at high or low risk for developing alcohol dependence. Each child was paired with different children (same-sex pairs) in independent sessions to determine the stability of the behavioral response.

RESULTS: High-risk children spent significantly more time staring at the other child during the peer play session while refraining from engaging in play, and significantly less time speaking to the other child.

Significantly more time was spent proximal to the parent, but only on the first peer play session. These behaviors have been shown to be indicators of behavioral inhibition.

CONCLUSIONS: These findings suggest that the presence of behavioral inhibition to the unfamiliar in childhood may be a risk factor for later development of alcohol dependence. While there is abundant evidence that childhood externalizing behaviors are risk factors for later development of substance dependence, the present results suggest that internalizing behaviors may be a pathway as well

SN - 0890-8567

AD - Department of Psychiatry, University of Pittsburgh Medical Center, Western Psychiatric Institute and Clinic, USA

UR - 10199112

ER -

TY - JOUR

ID - 399

T1 - Ocular injuries from paintball pellets

A1 - Thach,A.B.

A1 - Ward,T.P.

A1 - Hollifield,R.D.

A1 - Dugel,P.U.

A1 - Sipperley,J.O.

A1 - Marx,J.L.

A1 - Abrams,D.A.

A1 - Wroblewski,K.J.

A1 - Sonkin,P.L.

A1 - Birdsong,R.H.

A1 - Dunlap,W.A.

Y1 - 1999/03//

N1 - Thach, A B. Ward, T P. Hollifield, R D. Dugel, P U. Sipperley, J O. Marx, J L. Abrams, D A. Wroblewski, K J. Sonkin, P L. Birdsong, R H. Dunlap, W A

Ophthalmology

oi5, 7802443

IM

Journal Article

English

KW - Medline

KW - Adolescent

KW - Adult

KW - Child

KW - Cornea/in [Injuries]

KW - Eye Injuries/et [Etiology]

KW - Eye Injuries/pa [Pathology]

KW - Eye Injuries/su [Surgery]

KW - Eye Protective Devices

KW - Female

KW - Humans

KW - Hyphema/et [Etiology]

KW - Hyphema/pa [Pathology]

KW - Male

KW - Paint

KW - Play and Playthings/in [Injuries]

KW - Retinal Detachment/et [Etiology]

KW - Retinal Detachment/pa [Pathology]

KW - Retinal Perforations/et [Etiology]

KW - Retinal Perforations/pa [Pathology]

KW - Retrospective Studies

KW - Rupture

KW - Sclera/in [Injuries]

KW - Visual Acuity

KW - Vitreous Hemorrhage/et [Etiology]

KW - Vitreous Hemorrhage/pa [Pathology]

KW - Wounds

KW - Nonpenetrating/et [Etiology]

KW - Nonpenetrating/pa [Pathology]

KW - Nonpenetrating/su [Surgery]

RP - NOT IN FILE

SP - 533

EP - 537

JF - Ophthalmology

VL - 106

IS - 3

CY - UNITED STATES

N2 - OBJECTIVE: To evaluate the ocular effects of blunt trauma due to injury from a paintball pellet.

DESIGN: Noncomparative case series. PARTICIPANTS: Thirteen patients who suffered ocular injury from paintballs are described. The patients presented to six different civilian and military emergency departments in tertiary care medical centers. INTERVENTION: Patients were treated for the ocular injury. MAIN OUTCOME MEASURES: Patients were evaluated for initial and final visual acuity. The reason for persistent loss of vision was delineated. RESULTS: There were 12 males and 1 female with an average age of 21 years (range, 12-33 years). Eleven of the 13 had no ocular protection at the time of the ocular injury. On initial examination, nine patients had a hyphema, nine had a vitreous hemorrhage, six had a retinal tear or detachment, three had corneal or corneal-scleral ruptures, and one had traumatic optic neuropathy. The final visual acuity was 20/40 or better in two patients, 20/50 to 20/150 in three patients, and 20/200 or worse in eight patients. CONCLUSION: Injuries due to paintball pellets can result in severe ocular damage and significant loss of vision. Eyecare professionals should be aware of the risks of this sport and must strongly advise participants to wear adequate protection when involved in this activity

SN - 0161-6420

AD - Ophthalmology Service, Walter Reed Army Medical Center, Washington, DC 20307, USA

UR - 10080210

ER -

TY - JOUR

ID - 400

T1 - The prevention of playground injuries

A1 - Hudson,S.

A1 - Thompson,D.

A1 - Mack,M.G.

Y1 - 1999/08//

N1 - Hudson, S. Thompson, D. Mack, M G

The Journal of school nursing : the official publication of the National Association of School Nurses  
bgs, 9206498

N

Journal Article. Research Support, U.S. Gov't, P.H.S.

English

KW - Medline

KW - Accidental Falls/pc [Prevention & Control]

KW - Accidental Falls/sn [Statistics & Numerical Data]

KW - Child

KW - Child Welfare

KW - Humans

KW - Nursing Assessment

KW - Play and Playthings

KW - Primary Prevention/mt [Methods]

KW - Risk Assessment

KW - Risk Factors

KW - Safety Management/mt [Methods]

KW - School Nursing/mt [Methods]

KW - United States/ep [Epidemiology]

KW - Wounds and Injuries/ep [Epidemiology]

KW - Wounds and Injuries/pc [Prevention & Control]

RP - NOT IN FILE

SP - 30

EP - 33

JF - Journal of School Nursing

JA - J Sch Nurs

VL - 15

IS - 3



CY - UNITED STATES

N2 - Playground accidents are the most common cause of injury to children in school. As the health professional who attends to these injured children, school nurses should be aware of safety practices that can help eliminate the risks that children encounter. The National Program for Playground Safety has identified four areas that can reduce the level of risk on school playgrounds: supervision, age-appropriate design of the play area, fall surfaces under and around playground equipment, and equipment and surface maintenance. The article discusses each of these, and recommends leadership methods and practices that nurses can implement that will eliminate or reduce risk factors. In addition, a comprehensive playground risk model is described, and suggestions for policy areas are outlined. Policy areas include assessment, education, and enforcement in relation to each of the risk factors

SN - 1059-8405

AD - National Program for Playground Safety, School of Health, Physical Education and Leisure Services, University of Northern Iowa, Cedar Falls, USA

UR - 10745799

ER -

TY - JOUR

ID - 401

T1 - Problem-solving ability of inner-city children with and without in utero cocaine exposure

A1 - Betancourt,L.

A1 - Fischer,R.

A1 - Giannetta,J.

A1 - Malmud,E.

A1 - Brodsky,N.L.

A1 - Hurt,H.

Y1 - 1999/12//

N1 - Betancourt, L. Fischer, R. Giannetta, J. Malmud, E. Brodsky, N L. Hurt, H

Journal of developmental and behavioral pediatrics : JDBP

htf, 8006933

IM

Comparative Study. Journal Article. Research Support, Non-U.S. Gov't. Research Support, U.S. Gov't, P.H.S.

English

KW - Medline

KW - Child

KW - Preschool

KW - Cocaine

KW - Female

KW - Humans

KW - Pregnancy

KW - Prenatal Exposure Delayed Effects

KW - Problem Solving

KW - Socioeconomic Factors

KW - Urban Population/sn [Statistics & Numerical Data]

RP - NOT IN FILE

SP - 418

EP - 424

JF - Journal of Developmental & Behavioral Pediatrics

JA - J Dev.Behav Pediatr

VL - 20

IS - 6

CY - UNITED STATES

N2 - To evaluate the problem-solving abilities of a cohort of inner-city cocaine-exposed children and controls, children were invited to play with the Goodman Lock Box, a large red and blue box with 10 compartments, each having a different lock and toy. Examiners, blinded to the children's group status, coded the children's activities during the 6.5-minute play period. Nineteen behaviors were collapsed into three outcomes: Aimless Actions, Competence, and Mental Organization. Groups' scores were compared with scores of the Goodman

standardization sample of mixed socioeconomic status preschoolers. Seventy-three cocaine-exposed children and 82 controls were evaluated at age 3.5 years; of these, 58 cocaine-exposed and 63 controls were reevaluated at age 4.5 years. The groups' scores did not differ on any outcome at either time point ( $p > \text{or} = .22$ ). However, both groups' Mental Organization scores were consistently lower than the Goodman group at each age ( $p < .01$ ). This high-risk cohort may experience problems functioning in more complex environments such as the classroom

SN - 0196-206X

AD - Division of Neonatology, Albert Einstein Medical Center, Philadelphia, Pennsylvania 19141, USA

UR - 10608371

ER -

TY - JOUR

ID - 402

T1 - The socioemotional development of 5-year-old children of postnatally depressed mothers

A1 - Murray,L.

A1 - Sinclair,D.

A1 - Cooper,P.

A1 - Ducournau,P.

A1 - Turner,P.

A1 - Stein,A.

Y1 - 1999/11//

N1 - Murray, L. Sinclair, D. Cooper, P. Ducournau, P. Turner, P. Stein, A

Journal of child psychology and psychiatry, and allied disciplines

hp3, 0375361

IM

Journal Article. Research Support, Non-U.S. Gov't

English

KW - Medline

KW - Child Behavior Disorders/di [Diagnosis]

KW - Child Behavior Disorders/px [Psychology]

KW - Child of Impaired Parents/px [Psychology]

KW - Child

KW - Preschool

KW - Depression

KW - Postpartum/px [Psychology]

KW - Female

KW - Humans

KW - Male

KW - Marriage/px [Psychology]

KW - Object Attachment

KW - Parenting/px [Psychology]

KW - Personality Assessment

KW - Personality Development

KW - Risk Factors

KW - Social Adjustment

RP - NOT IN FILE

SP - 1259

EP - 1271

JF - Journal of Child Psychology & Psychiatry & Allied Disciplines

JA - J Child Psychol.Psychiatry

VL - 40

IS - 8

CY - ENGLAND

N2 - A community sample of depressed and well mothers, recruited at 2 months postpartum and assessed through to 18 months, was followed up at 5 years. The quality of mother-child interactions was assessed, as was the children's behavioural and social adjustment, using maternal reports and observations of child behaviour

during free play at school. Several aspects of child outcome were found to be associated with postnatal depression, even when taking account of current adverse circumstances (maternal depression and parental conflict). These included the child's behaviour with the mother, the presence of behavioural disturbance at home, and the content and social patterning of play at school. These associations with postnatal depression were independent of the child's gender. The child's relationship with the mother appeared to be mediated by the quality of infant attachment at 18 months. The mother's behaviour with her child was more affected by current difficulties, in particular by conflict with the child's father. Together these findings suggest that, while maternal behaviour varies with changing circumstances, exposure to maternal depression in the early postpartum months may have an enduring influence on child psychological adjustment

SN - 0021-9630

AD - Winnicott Research Unit, Department of Psychology, The University of Reading, UK

UR - 10604404

ER -

TY - JOUR

ID - 403

T1 - Childhood injury prevention at home and play. [Review] [39 refs]

A1 - Dowd,M.D.

Y1 - 1999/12//

N1 - Dowd, M D

Current opinion in pediatrics

but, 9000850

IM

Journal Article. Review

English

KW - Medline

KW - Accidents

KW - Home/pc [Prevention & Control]

KW - Bicycling/in [Injuries]

KW - Burns/pc [Prevention & Control]

KW - Child

KW - Head Protective Devices

KW - Humans

KW - Play and Playthings

KW - Poisoning/pc [Prevention & Control]

KW - Wounds

KW - Gunshot/pc [Prevention & Control]

RP - NOT IN FILE

SP - 578

EP - 582

JF - Current Opinion in Pediatrics

JA - Curr.Opin.Pediatr

VL - 11

IS - 6

CY - UNITED STATES

N2 - Unintentional injuries are the leading cause of death for children and adolescents in the United States, and they create a significant burden of disability and financial cost. If motor vehicle-associated injuries are not considered, children are most commonly injured in their home and play environments. The reduction over the past 20 years in childhood deaths related to motor vehicle injury has been significant, but rates of childhood death due to other causes, such as firearms, have increased. This review focuses on several categories of injuries other than motor vehicle injuries and highlights a few recent successful community- and practice-based injury-prevention programs. In addition, recent epidemiologic studies describing risk factors for injury-related death are discussed. Injuries due to interpersonal violence and motor vehicles are covered elsewhere. [References: 39]

SN - 1040-8703

AD - Division of Emergency Medicine, Children's Mercy Hospital, Kansas City, Missouri 64108, USA

UR - 10590919

ER -

TY - JOUR

ID - 404

T1 - Are ball pits the playground for potentially harmful bacteria?

A1 - Davis,S.G.

A1 - Corbitt,A.M.

A1 - Everton,V.M.

A1 - Grano,C.A.

A1 - Kiefner,P.A.

A1 - Wilson,A.S.

A1 - Gray,M.

Y1 - 1999/03//

N1 - Davis, S G. Corbitt, A M. Everton, V M. Grano, C A. Kiefner, P A. Wilson, A S. Gray, M  
Pediatric nursing

oun, 7505804

N

Journal Article. Research Support, Non-U.S. Gov't

English

KW - Medline

KW - Bacterial Infections/et [Etiology]

KW - Bacterial Infections/pc [Prevention & Control]

KW - Child

KW - Preschool

KW - Colony Count

KW - Microbial

KW - Disinfection/mt [Methods]

KW - Equipment Contamination/pc [Prevention & Control]

KW - Equipment Contamination/sn [Statistics & Numerical Data]

KW - Health Education

KW - Humans

KW - Pediatric Nursing

KW - Pilot Projects

KW - Play and Playthings

KW - Restaurants

KW - Safety Management/mt [Methods]

KW - Urban Health/sn [Statistics & Numerical Data]

KW - Virginia

RP - NOT IN FILE

SP - 151

EP - 155

JF - Pediatric Nursing

JA - Pediatr Nurs

VL - 25

IS - 2

CY - UNITED STATES

N2 - Ball pits, enclosed play areas with padded floors and pits of small plastic balls, have become popular features for children at fast food restaurants. This pilot study sought to identify and confirm bacterial organisms that place children at a potential health risk in three play pits within fast food restaurants. Data for this descriptive study were randomly collected from restaurants offering play pits with multicolored, round, hollow, plastic balls within urban communities of the Tidewater region of Virginia. Specimens were collected from entrances into the ball pits as well as various areas of the bottom lining to incur a representative sample. Results indicated an increased level of normal flora as well as nonhuman flora, demonstrating that bacteria are present within the ball pits. The results question the safety of these play pits for both health care providers and parents. Nurses play a vital role in public awareness through health education. Disinfection protocol and proper handwashing are the keys to making ball pit play areas safe for children

SN - 0097-9805

AD - Coronary Care Unit, Riverside Regional Medical Center, Newport News, VA, USA

UR - 10532011

ER -

TY - JOUR

ID - 405

T1 - Initial assessment of children's ability to climb stair guarding

A1 - Riley,J.E.

A1 - Roys,M.S.

A1 - Cayless,S.M.

Y1 - 1998/12//

N1 - Riley, J E. Roys, M S. Cayless, S M

The journal of the Royal Society for the Promotion of Health

IM

Journal Article. Research Support, Non-U.S. Gov't

English

KW - Medline

KW - Accidents

KW - Home/pc [Prevention & Control]

KW - Home

KW - Biomechanics

KW - Body Height

KW - Child

KW - Child Behavior

KW - Preschool

KW - Female

KW - Hand Strength/ph [Physiology]

KW - Humans

KW - Leg/ah [Anatomy & Histology]

KW - Male

KW - Play and Playthings

KW - Posture

KW - Protective Devices/st [Standards]

KW - Safety Management/mt [Methods]

KW - Sex Characteristics

KW - Walking/in [Injuries]

KW - Walking/ph [Physiology]

RP - NOT IN FILE

SP - 331

EP - 337

JF - Journal of the Royal Society for the Promotion of Health

JA - J R SOC PROMOT HEALTH

VL - 118

IS - 6

CY - ENGLAND

N2 - This study examined the ability of children aged between four and six years to climb stair guarding set at the minimum height for domestic handrails recommended in the guidance given in Approved Document K that supports the Building Regulations in England and Wales. The purpose was to assess the adequacy of such safety guidance. Simulated guarding was set up at an indoor play centre and behaviours examined in two groups of children. Observations were made during free play and during solicited climbing. Results indicate that the majority of children aged between four and six years can climb onto or over stair guarding unassisted. Younger children are influenced and frequently abetted by their elders in climbing, behaviour which may be replicated in the home environment. Three distinct climbing strategies are observed: the body hoisted in a semi-prone position onto the top of the guarding; the body lifted by arms above the height of the guarding enabling a kneeling position on the top of the guarding; and, the knee bent against the side of the guarding to gain the

added height required to make the climb. It was noted that older or taller children tend to rely on height, leg length or each whilst climbing whereas younger children appear to depend more on strength. A re-examination of safety guidance in relation to barrier climbability by children is recommended, and has started at BRE

SN - 1466-4240

AD - Healthy Building Centre, Garston, Watford

UR - 10076694

ER -

TY - JOUR

ID - 406

T1 - [Toy cap pistols and their effect on hearing]. [German]

A1 - Fleischer,G.

A1 - Hoffmann,E.

A1 - Muller,R.

A1 - Lang,R.

Y1 - 1998/09//

N1 - Fleischer, G. Hoffmann, E. Muller, R. Lang, R

HNO

g9p, 2985099r

IM

English Abstract. Journal Article

German

KW - Medline

KW - Auditory Fatigue/ph [Physiology]

KW - Child

KW - Consumer Product Safety

KW - Europe

KW - Firearms

KW - Hearing Loss

KW - Noise-Induced/et [Etiology]

KW - Humans

KW - Play and Playthings

KW - Risk Factors

KW - Sound Spectrography

RP - NOT IN FILE

SP - 815

EP - 820

JF - HNO

VL - 46

IS - 9

CY - GERMANY

N2 - In order to understand the repeated occurrences of auditory impairments caused by toy pistols, an analysis of the circumstances involved was performed at Justus-Liebig University of Giessen. The acoustic impact of toy pistols on the ear was determined with a special measuring system for impulse noise. Results were compared with the acoustic impacts of the G3 common rifle of the German military on the ear of the soldier. It was apparent that all of the five randomly selected types of toy pistols were much louder than the military rifle, if fired close to the ear. The current standard of the European Union related to the safety of toys (EN 71-1) tolerates peaks of impulse noise from toy pistols that are actually illegal for workplaces without auditory protection. Measurements showed that the toy pistols tested were even louder than that tolerated by the EU standard. Problems related to acute acoustic trauma caused by these toys are discussed using recent examples. In order to prevent such injuries, we suggest limiting the loudness of the "worst case" instead of using unrealistic measurements

SN - 0017-6192

AD - Arbeitsgruppe Horforschung, Medizinisches Zentrum für Ökologie, Klinikum der Universität Giessen

UR - 9816536

ER -

TY - JOUR  
ID - 407  
T1 - Working with avoidant children: a clinical challenge  
A1 - Berson,N.  
A1 - Meisburger,D.  
Y1 - 1998/07//  
N1 - Berson, N. Meisburger, D  
Child welfare  
0372735, d2u, 0372735  
IM  
Journal Article  
English  
KW - Medline  
KW - Art  
KW - Avoidance Learning  
KW - Child  
KW - Child Abuse/di [Diagnosis]  
KW - Child Abuse/px [Psychology]  
KW - Child Psychology  
KW - Child Welfare  
KW - Female  
KW - Humans  
KW - Interviews as Topic/mt [Methods]  
KW - Male  
KW - Photography  
KW - Play and Playthings  
KW - Professional-Patient Relations  
KW - Risk Factors  
KW - Truth Disclosure  
RP - NOT IN FILE  
SP - 427  
EP - 439  
JF - Child Welfare  
VL - 77  
IS - 4  
CY - UNITED STATES  
N2 - Clinicians have become increasingly aware of the difficulty inherent in interviewing avoidant children for possible maltreatment. Evaluations of avoidant children in cases involving multiple risk factors for maltreatment are often the most complex. The dilemma lies in balancing forensic standards while ensuring that every effort is made to enable children to relate their experiences. It is incumbent upon the evaluator to be aware of the reasons children may resist sharing their experiences. Initial stages of the interview process are discussed, including techniques for dealing with avoidant children  
SN - 0009-4021  
AD - Department of Psychiatry, University of North Carolina, Chapel Hill, USA  
UR - 9666553  
ER -  
  
TY - JOUR  
ID - 408  
T1 - Toys within chocolate eggs--an ingestion hazard  
A1 - Weizman,Z.  
A1 - Krugliak,P.  
Y1 - 1998/04//  
N1 - Weizman, Z. Krugliak, P  
Acta paediatrica (Oslo, Norway : 1992)

bgc, 9205968

IM

Letter

English

KW - Medline

KW - Accidents

KW - Cacao

KW - Candy/ae [Adverse Effects]

KW - Candy

KW - Child

KW - Preschool

KW - Foreign Bodies

KW - Humans

KW - Infant

KW - Play and Playthings/in [Injuries]

KW - Safety

RP - NOT IN FILE

SP - 478

EP - 479

JF - Acta Paediatrica

JA - Acta Paediatr

VL - 87

IS - 4

CY - NORWAY

SN - 0803-5253

UR - 9628313

ER -

TY - JOUR

ID - 409

T1 - The rocking horse risk

A1 - Woodward,S.

Y1 - 1998/04//

N1 - Woodward, S

Nursing management (Harrow, London, England : 1994)

b2k, 9433248

N

Journal Article

English

KW - Medline

KW - Accidental Falls/pc [Prevention & Control]

KW - Child

KW - Hospitals

KW - Pediatric/og [Organization & Administration]

KW - Public/og [Organization & Administration]

KW - Humans

KW - London

KW - Nursing

KW - Supervisory/og [Organization & Administration]

KW - Pediatric Nursing

KW - Play and Playthings

KW - Risk Management/og [Organization & Administration]

KW - State Medicine

RP - NOT IN FILE

SP - 10

EP - 13



JF - Nursing Management (Harrow)

JA - Nurs Manage.(London)

VL - 5

IS - 1

CY - ENGLAND

SN - 1354-5760

AD - Department of Nursing, Great Ormond Street Hospital for Children NHS Trust, London

UR - 9611595

ER -

TY - JOUR

ID - 410

T1 - Why do boys engage in more risk taking than girls? The role of attributions, beliefs, and risk appraisals

A1 - Morrongiello,B.A.

A1 - Rennie,H.

Y1 - 1998/02//

N1 - Morrongiello, B A. Rennie, H

Journal of pediatric psychology

j18, 7801773

IM

Comparative Study. Journal Article. Research Support, Non-U.S. Gov't

English

KW - Medline

KW - Analysis of Variance

KW - Child

KW - Culture

KW - Female

KW - Humans

KW - Male

KW - Ontario

KW - Risk-Taking

KW - Sex Factors

KW - Social Perception

KW - Wounds and Injuries/pc [Prevention & Control]

KW - Wounds and Injuries/px [Psychology]

RP - NOT IN FILE

SP - 33

EP - 43

JF - Journal of Pediatric Psychology

JA - J Pediatr Psychol.

VL - 23

IS - 1

CY - UNITED STATES

N2 - OBJECTIVE: Assessed for age and sex differences in school-age children's reporting of injury-risk behaviors, ratings of injury-risk in various play situations, attributions for injuries (self, other, bad luck), and beliefs about their vulnerability to injury in comparison to their peers (more, less, comparable vulnerability). METHODS: We used a structured interview and drawings that depicted children showing wary or confident facial expressions when engaged in injury-risk play activities. RESULTS: Children's reported risk taking could be predicted from their risk appraisals, beliefs about the likelihood of injury, and attributions of injuries to bad luck, and these factors resulted 80% correct assignment of cases by sex in a discriminant analysis. The wary affect display resulted in higher injury-risk ratings than the confident display, with this effect being greater for girls than boys. CONCLUSIONS: Cognitive-based factors differentiate boys from girls and contribute to sex differences in children's injury-risk behaviors

SN - 0146-8693

AD - Case Western Reserve University, USA. bethc@pcicirs.pci.pitt.edu

UR - 9564127

ER -

TY - JOUR

ID - 411

T1 - From the Centers for Disease Control and Prevention. Toy-related injuries among children and teenagers--  
United States, 1996

Y1 - 1998/01/28/

N1 - JAMA : the journal of the American Medical Association  
7501160

AIM, IM

Case Reports. Journal Article

English

KW - Medline

KW - Accidents

KW - Home

KW - Adolescent

KW - Child

KW - Preschool

KW - Consumer Product Safety

KW - Female

KW - Humans

KW - Infant

KW - Male

KW - Play and Playthings

KW - Safety

KW - United States/ep [Epidemiology]

KW - Wounds and Injuries/ep [Epidemiology]

KW - Wounds and Injuries/et [Etiology]

KW - Wounds and Injuries/mo [Mortality]

RP - NOT IN FILE

SP - 265

JF - JAMA

VL - 279

IS - 4

CY - UNITED STATES

SN - 0098-7484

UR - 9450699

ER -

TY - JOUR

ID - 412

T1 - Childhood eye injuries in North Jordan

A1 - Al-Bdour, M.D.

A1 - Azab, M.A.

Y1 - 1998///

N1 - Al-Bdour, M D. Azab, M A

International ophthalmology

gsf, 7904294

IM

Journal Article

English

KW - Medline

KW - Adolescent

KW - Age Distribution

KW - Athletic Injuries/ep [Epidemiology]

KW - Child

KW - Preschool  
 KW - Eye Injuries/ep [Epidemiology]  
 KW - Eye Injuries/et [Etiology]  
 KW - Eye Injuries/pp [Physiopathology]  
 KW - Female  
 KW - Humans  
 KW - Infant  
 KW - Newborn  
 KW - Jordan  
 KW - Male  
 KW - Play and Playthings  
 KW - Sex Distribution  
 KW - Time Factors  
 KW - Visual Acuity  
 KW - Wounds  
 KW - Nonpenetrating/ep [Epidemiology]  
 KW - Penetrating/ep [Epidemiology]  
 RP - NOT IN FILE  
 SP - 269  
 EP - 273  
 JF - International Ophthalmology  
 JA - Int.Ophthalmol.  
 VL - 22  
 IS - 5  
 CY - NETHERLANDS  
 N2 - AIMS: To provide epidemiological data on serious eye injuries among children that can be utilized in planning health education and safety strategies for preventing such injuries. MATERIALS AND METHODS: Records were reviewed of 116 children who sustained serious eye injuries which required admission to Princess Basma Teaching Hospital between October 1995 and November 1998. The material was analyzed retrospectively with respect to various epidemiological features. RESULTS: 71.5% of the injured children were male and 28.5% were female. There was a marked preponderance of injuries in the age group 6-10 years. The majority of injuries occurred during play and sport (74.1%). Stones and sharp objects were the most common causes accounting for 18.1% and 17.2% respectively. Most of the sharp objects were household instruments. Perforating injuries were more common than non-perforating injuries. 56% of injured eyes had a low vision with visual acuity between 6/24 and 3/60, and 13% had a blinding outcome with visual acuity less than 3/60. CONCLUSION: The major causes of serious eye injuries among these children were unnecessary risks during play, the use of dangerous objects and insufficient supervision by adults, especially at home. Health education should be directed towards prevention of such serious injuries  
 SN - 0165-5701  
 AD - Department of Ophthalmology, School of Medicine, Jordan University of Science and Technology, Irbid. mdb@firstnet.com.jo  
 UR - 10826542  
 ER -

TY - JOUR  
 ID - 413  
 T1 - Transorbital penetrating brain injury caused by a toy arrow: a case report. [Review] [17 refs]  
 A1 - Paucic-Kirincic,E.  
 A1 - Prpic,I.  
 A1 - Gazdik,M.  
 A1 - Kriz,M.  
 A1 - Vojnikovic,B.  
 A1 - Golubovic,V.  
 Y1 - 1997/07//  
 N1 - Paucic-Kirincic, E. Prpic, I. Gazdik, M. Kriz, M. Vojnikovic, B. Golubovic, V  
 Pediatric rehabilitation

c5h, 9709256

IM

Case Reports. Journal Article. Review

English

KW - Medline

KW - Brain Injuries/et [Etiology]

KW - Cerebral Hemorrhage/et [Etiology]

KW - Child

KW - Cognition Disorders/et [Etiology]

KW - Coma/et [Etiology]

KW - Eye Enucleation

KW - Eye Injuries

KW - Penetrating/et [Etiology]

KW - Follow-Up Studies

KW - Glasgow Coma Scale

KW - Hemiplegia/et [Etiology]

KW - Humans

KW - Male

KW - Orbital Fractures/et [Etiology]

KW - Play and Playthings/in [Injuries]

KW - Prolapse

KW - Tomography

KW - X-Ray Computed

KW - Wounds

RP - NOT IN FILE

SP - 191

EP - 193

JF - Pediatric Rehabilitation

JA - Pediatr Rehabil.

VL - 1

IS - 3

CY - ENGLAND

N2 - A case of a 9-year-old boy with a transorbital toy-arrow injury to the brain is presented. At admission he was in coma (Glasgow Coma Scale of 6) with right hemiparesis and had a completely prolapsed left eye. Computerized tomography revealed intracranial haemorrhage and fracture of the orbital wall, which were treated conservatively. His left eye was enucleated due to massive injury. At the 6-month check-up the boy still show neurological signs of latent right hemiparesis. Disturbances, mostly cognitive, were noted on his psychological tests. A survey of the literature reveals no report of this nature in the paediatric age group. The necessity of continuous monitoring of new environmental risks as they occur, and the requirement for the prevention of recreational brain injuries in children, is stressed. [References: 17]

SN - 1363-8491

AD - Department of Pediatrics Children's Hospital Kantrida, Rijeka, Croatia

UR - 9689255

ER -

TY - JOUR

ID - 414

T1 - Childhood obesity: a risk factor for traumatic injuries to anterior teeth

A1 - Petti,S.

A1 - Cairella,G.

A1 - Tarsitani,G.

Y1 - 1997/12//

N1 - Petti, S. Cairella, G. Tarsitani, G

Endodontics & dental traumatology

ehd, 8508054

D

Journal Article

English

KW - Medline

KW - Accident Proneness

KW - Age Distribution

KW - Child

KW - Child Behavior

KW - Cross-Sectional Studies

KW - Female

KW - Humans

KW - Life Style

KW - Male

KW - Obesity/co [Complications]

KW - Obesity/px [Psychology]

KW - Prevalence

KW - Questionnaires

KW - Risk Factors

KW - Rome/ep [Epidemiology]

KW - Sex Distribution

KW - Tooth Injuries/ep [Epidemiology]

KW - Tooth Injuries/et [Etiology]

RP - NOT IN FILE

SP - 285

EP - 288

JF - Endodontics &amp; Dental Traumatology

JA - Endod.Dent.Traumatol.

VL - 13

IS - 6

CY - DENMARK

N2 - The relationship between obesity and traumatic dental injuries was evaluated in a study population of 938 6- to 11-year-old schoolchildren from Rome, Italy, and it was suggested by the lifestyle and the physical activity of obese children, which, according to many authors, is different from the lifestyle of other children. The subjects were examined at school: presence and type of dental injury, overjet, incisor protrusion, upper lip incompetence and presence of obesity were recorded. Trauma predisposition was evaluated with a questionnaire investigating the behaviour which may predispose to impacts. Six out of eight questions in this questionnaire concerned the children's lifestyle and the trauma predisposition score was therefore also considered an estimate of lifestyle and physical activity. The dental injury prevalence of the study population was 21.3% and obesity prevalence was 11.4%. Of the obese children 30.8% had dental injuries vs. only 20.0% of non-obese subjects ( $P = 0.007$ ). Obese children had only enamel and enamel-dentine fractures and the main reported trauma cause was indoor play; conversely, lean children also had other types of injuries and the most frequently reported cause was outdoor play. The main predisposing factors significantly affecting the probability of dental injury, evaluated with multiple logistic regression, were upper lip uncoverage (OR: 1.23;  $P = 0.02$ ), overjet larger than 3 mm (OR: 1.68;  $P = 0.001$ ) and obesity (OR: 1.45;  $P = 0.01$ ). Surprisingly, trauma predisposition was a protective factor (OR: 0.50;  $P = 0.00001$ ). The results of this study were explained by the significant inverse correlation between obesity and trauma-predisposing behaviour, thus suggesting that subjects frequently playing sports and lively games were not only less obese but also more skillful and, for this reason, less prone to trauma when they fell or sustained impacts

SN - 0109-2502

AD - G. Sanarelli Hygiene Institute, La Sapienza University, Rome, Italy

UR - 9558511

ER -

TY - JOUR

ID - 415

T1 - Council playgrounds in New South Wales: compliance with safety guidelines

A1 - Witheaneachi,D.

A1 - Meehan,T.  
Y1 - 1997/10//  
N1 - Witheaneachi, D. Meehan, T  
Australian and New Zealand journal of public health  
ck2, 9611095  
IM

Journal Article  
English  
KW - Medline  
KW - Child  
KW - Child Welfare  
KW - Humans  
KW - New South Wales  
KW - Play and Playthings  
KW - Safety  
KW - Wounds and Injuries/pc [Prevention & Control]  
RP - NOT IN FILE  
SP - 577  
EP - 580  
JF - Australian & New Zealand Journal of Public Health  
JA - Aust N.Z.J Public Health  
VL - 21  
IS - 6  
CY - AUSTRALIA

N2 - Despite initiatives to improve the safety of play environments, playground-related injuries continue to be a major public health problem. Efforts to address playground safety in New South Wales were consolidated during 1994 through the Kidsafe Playground Safety Project. In stage 1 of the project (described here), 240 council playgrounds were assessed to determine the extent to which playground equipment complied with safety guidelines. On-site inspection of the selected playgrounds provided data on 862 separate pieces of playground equipment. Of the 723 pieces requiring undersurfacing, less than half (45.4 per cent) had the recommended type of undersurfacing while only 42 of those pieces had undersurfacing to the recommended depth. However, when the fall height of equipment was considered in addition to the undersurfacing guidelines, only 13 (1.8 per cent) of the 723 pieces of equipment simultaneously satisfied all of the safety guidelines. Regrettably, none of the 240 council playgrounds assessed complied fully with the key safety guidelines. The results underscore the need for a collaborative effort on the part of local government, Kidsafe and health promotion and regional public health units to ensure that council playgrounds in New South Wales comply with recommended safety guidelines

SN - 1326-0200  
AD - Kidsafe NSW, The New Children's Hospital, Sydney  
UR - 9470261  
ER -

TY - JOUR  
ID - 416  
T1 - Talking about self and other: emergence of an internal state lexicon in young children with Down syndrome

A1 - Beeghly,M.  
A1 - Cicchetti,D.  
Y1 - 1997///  
N1 - Beeghly, M. Cicchetti, D  
Development and psychopathology  
cn7, 8910645  
IM

Journal Article. Research Support, Non-U.S. Gov't  
English  
KW - Medline  
KW - Adult

KW - Affect  
 KW - Child  
 KW - Preschool  
 KW - Cognition  
 KW - Cohort Studies  
 KW - Down Syndrome/px [Psychology]  
 KW - Emotions  
 KW - Female  
 KW - Humans  
 KW - Infant  
 KW - Interpersonal Relations  
 KW - Judgment  
 KW - Language Development  
 KW - Male  
 KW - Maternal Age  
 KW - Reference Values  
 KW - Self Concept  
 KW - Socioeconomic Factors  
 KW - Speech  
 RP - NOT IN FILE  
 SP - 729  
 EP - 748  
 JF - Development & Psychopathology  
 JA - Dev.Psychopathol.  
 VL - 9  
 IS - 4  
 CY - UNITED STATES

N2 - The ability to talk about the internal states (IS) of self and other is an age-typical development of early childhood that is thought to reflect young children's emergent self-other understanding. This study examined the emergence of an IS lexicon in a cross-sectional sample of young children with Down syndrome (DS) and a cognitively and demographically comparable group of normally developing (ND) children. Children's IS lexicons were derived from transcripts of their spontaneous utterances during two laboratory contexts: a mother-child emotions picture book task and semistructured play. Children with DS produced significantly fewer IS words and fewer IS word types than their MA-matched counterparts. Controlling for corpus size, children with DS also were less likely to attribute internal states to themselves and were more context bound in their use of IS language. In addition, children with DS also differed from ND children in the semantic content of their IS language, with proportionately higher rates of affective words and lower rates for words about volition ability, and cognition. For both the DS and ND groups, individual differences in IS language production were significantly related to general expressive language skills. However, dissociations were observed for the relation between children's IS word production and nonverbal symbolic play skills in the two groups. These findings suggest some degree of disorganization at the interface among symbolic domains for children with DS. Because IS language is critical to the regulation of social interaction and an early index of self-other differentiation and understanding, children with DS may be at risk for later compromises in self-organization

SN - 0954-5794

AD - Harvard Medical School, Boston, MA, USA. beeghly@a1.tch.harvard.edu

UR - 9449003

ER -

TY - JOUR

ID - 417

T1 - An analysis of playground surface injuries

A1 - Mack,M.G.

A1 - Thompson,D.

A1 - Hudson,S.

Y1 - 1997/12//

N1 - Mack, M G. Thompson, D. Hudson, S  
Research quarterly for exercise and sport  
r6y, 8006373  
IM  
Journal Article. Research Support, U.S. Gov't, P.H.S.  
English  
KW - Medline  
KW - Accidental Falls/sn [Statistics & Numerical Data]  
KW - Child  
KW - Preschool  
KW - Humans  
KW - Play and Playthings  
KW - Safety  
KW - United States/ep [Epidemiology]  
KW - Wounds and Injuries/ep [Epidemiology]  
RP - NOT IN FILE  
SP - 368  
EP - 372  
JF - Research Quarterly for Exercise & Sport  
JA - Res.Q Exerc.Sport  
VL - 68  
IS - 4  
CY - UNITED STATES  
SN - 0270-1367  
AD - School of Health, Physical Education, and Leisure Services, University of Northern Iowa, USA  
UR - 9421850  
ER -  
  
TY - JOUR  
ID - 418  
T1 - Toy-related injuries among children and teenagers--United States, 1996  
A1 - Centers for Disease Control and Prevention (CDC)  
Y1 - 1997/12//  
N1 - Centers for Disease Control and Prevention (CDC)  
MMWR. Morbidity and mortality weekly report  
ne8, 7802429  
IM  
Case Reports. Journal Article  
English  
KW - Medline  
KW - Accidents  
KW - Home  
KW - Adolescent  
KW - Child  
KW - Preschool  
KW - Consumer Product Safety  
KW - Female  
KW - Humans  
KW - Infant  
KW - Male  
KW - Play and Playthings  
KW - Safety  
KW - United States/ep [Epidemiology]  
KW - Wounds and Injuries/ep [Epidemiology]  
KW - Wounds and Injuries/et [Etiology]  
KW - Wounds and Injuries/mo [Mortality]



RP - NOT IN FILE

SP - 1185

EP - 1189

JF - MMWR - Morbidity & Mortality Weekly Report

JA - MMWR Morb.Mortal.Wkly.Rep.

VL - 46

IS - 50

CY - UNITED STATES

N2 - Each year, approximately two billion toys and games are sold in the United States. Although most toys are safe when risks are measured against the frequency of their use, children are at risk for some toy-related injuries and deaths. To characterize the magnitude of this problem, CDC analyzed data from the U.S. Consumer Product Safety Commission (CPSC) for 1996. This report summarizes this analysis and underscores the importance of parental participation in the selection and use of toys

SN - 0149-2195

UR - 9414147

ER -

TY - JOUR

ID - 419

T1 - Behavioural changes in children following day-case surgery: a 4-week follow-up of 551 children

A1 - Kotiniemi,L.H.

A1 - Ryhanen,P.T.

A1 - Moilanen,I.K.

Y1 - 1997/10//

N1 - Kotiniemi, L H. Ryhanen, P T. Moilanen, I K

Anaesthesia

4mc, 0370524

AIM, IM

Journal Article. Multicenter Study

English

KW - Medline

KW - Adolescent

KW - Age Factors

KW - Ambulatory Surgical Procedures/px [Psychology]

KW - Anesthesia

KW - General

KW - Child

KW - Child Behavior

KW - Child Behavior Disorders/et [Etiology]

KW - Preschool

KW - Female

KW - Follow-Up Studies

KW - Humans

KW - Infant

KW - Male

KW - Pain

KW - Postoperative/px [Psychology]

KW - Play and Playthings

KW - Postoperative Complications

KW - Preanesthetic Medication/px [Psychology]

KW - Prospective Studies

KW - Risk Factors

RP - NOT IN FILE

SP - 970

EP - 976

JF - Anaesthesia

VL - 52

IS - 10

CY - ENGLAND

N2 - The purpose of this prospective multicentre survey was to evaluate the occurrence and the type of changes in children's behaviour during the first 4 weeks following the day of surgery, and to assess the significance of some patient-related factors on the incidence. Pre- and postoperative questionnaires were completed by the parents of 551 children aged 4 months to 13.4 years in five hospitals incorporating nine operative units in Northern Finland. The overall incidence of problematical behavioural changes was 47% and that of beneficial changes 17%. Problematical changes were most common in the 1.0 to 2.9 year olds and the incidence decreased significantly from 46% on the day of the operation to 9% 4 weeks later ( $p < 0.0001$ ). Predictors by multiple logistic regression analysis were age, mild pain at home following surgery, severe pain and a previous bad experience of health care which had adversely affected the attitude of the child towards doctors or nurses. Hospital influenced playing was a significant factor 3 and 4 weeks after the operation. By the 4th week, beneficial and problematical changes were equally common (9%). Gender, previous operations and experience of repeated paracenteses (for treatment of middle ear infection) did not have a significant effect on the incidence. Pain on the day of the operation predicted the occurrence of behavioural problems up to the 4th week, 2-4 weeks longer than the duration of pain itself. The results emphasise the importance of effective prevention of postoperative pain as well as the importance of avoiding unpleasant experiences in all contacts children have with health care. Playing could perhaps be used to help children cope with a short hospital experience

SN - 0003-2409

AD - Department of Anaesthesiology, University of Oulu, Finland

UR - 9370839

ER -

TY - JOUR

ID - 420

T1 - Safety of surfaces and equipment for children in playgrounds

A1 - Mott,A.

A1 - Rolfe,K.

A1 - James,R.

A1 - Evans,R.

A1 - Kemp,A.

A1 - Dunstan,F.

A1 - Kemp,K.

A1 - Sibert,J.

Y1 - 1997/06/28/

N1 - Mott, A. Rolfe, K. James, R. Evans, R. Kemp, A. Dunstan, F. Kemp, K. Sibert, J

Lancet

2985213r, 10s, 0053266

AIM, IM

Journal Article. Research Support, Non-U.S. Gov't

English

KW - Medline

KW - Accidental Falls/sn [Statistics &amp; Numerical Data]

KW - Adolescent

KW - Arm Injuries/ep [Epidemiology]

KW - Arm Injuries/et [Etiology]

KW - Child

KW - Child Welfare

KW - Preschool

KW - Construction Materials

KW - Fractures

KW - Bone/ep [Epidemiology]

KW - Bone/et [Etiology]

KW - Humans

KW - Infant

KW - Newborn  
 KW - Play and Playthings  
 KW - Rubber  
 KW - Safety  
 KW - Surface Properties  
 KW - Wales/ep [Epidemiology]  
 KW - Wounds and Injuries/ep [Epidemiology]  
 KW - Wounds and Injuries/et [Etiology]  
 KW - Wounds and Injuries/pc [Prevention & Control]

RP - NOT IN FILE

SP - 1874

EP - 1876

JF - Lancet

VL - 349

IS - 9069

CY - ENGLAND

N2 - BACKGROUND: The safety of playgrounds is important to protect children from injury, but studies are mostly done mainly under laboratory conditions without epidemiological data. We investigated the safety of different playground surfaces, and types and heights of equipment in public playgrounds in the City of Cardiff, UK. METHODS: We did a correlational study of 330 children aged between 0 and 14 years. All children were hurt when playing in playgrounds in Cardiff and presented to the Accident and Emergency Department in Cardiff Royal Infirmary during summer (April to September) 1992 and 1993, and the whole of 1994. We studied the children's hospital records to establish the type of injury and interviewed their parents to find out the playground and type of equipment involved. The main outcome measures were the number of children injured whilst playing, and injury rates per observed number of children on different surfaces, types, and heights of equipment. FINDINGS: Children sustained significantly more injuries in playgrounds with concrete surfaces than in those with bark or rubberised surfaces ( $p < 0.001$ ). Playgrounds with rubber surfaces had the lowest rate of injury, with a risk half that of bark and a fifth of that of concrete. Bark surfaces were not significantly more protective against arm fractures than concrete. Most injuries were equipment related. Injury risk due to falls from monkey bars (suspended parallel bars or rings between which children swing) was twice that for climbing-frames and seven times that for swings or slides. The height of the equipment correlated significantly with the number of fractures ( $p = 0.005$ ) from falls. INTERPRETATION: Rubber or bark surfacing is associated with a low rate of injuries and we support their use in all public playgrounds. Bark alone is insufficient, however, to prevent all injuries, particularly arm fractures. Rubberised impact-absorbing surfaces are safer than bark. We believe that playing on monkey bars increases the risk of injury in playgrounds and that they should generally not be installed. Safety standards should be based on physical and epidemiological data. Our data suggest that the proposed raising of the maximum fall height from 2.5 m to 3.0 m in Europe is worrying

SN - 0140-6736

AD - Department of Child Health, University of Wales College of Medicine Academic Centre, Llandough Hospital, Penarth, Vale of Glamorgan, UK

UR - 9217759

ER -

TY - JOUR

ID - 421

T1 - A descriptive analysis of children's playground injuries in the United States 1990-4

A1 - Mack,M.G.

A1 - Hudson,S.

A1 - Thompson,D.

Y1 - 1997/06//

N1 - Mack, M G. Hudson, S. Thompson, D

Injury prevention : journal of the International Society for Child and Adolescent Injury Prevention  
 crz, 9510056

IM

Journal Article. Research Support, U.S. Gov't, P.H.S.

English

KW - Medline  
 KW - Adolescent  
 KW - Age Distribution  
 KW - Child  
 KW - Preschool  
 KW - Data Collection  
 KW - Equipment and Supplies/sn [Statistics & Numerical Data]  
 KW - Female  
 KW - Hospitalization/sn [Statistics & Numerical Data]  
 KW - Humans  
 KW - Infant  
 KW - Newborn  
 KW - Injury Severity Score  
 KW - Male  
 KW - Play and Playthings/in [Injuries]  
 KW - Risk Factors  
 KW - Safety  
 KW - Sampling Studies  
 KW - Sex Distribution  
 KW - Survival Rate  
 KW - United States/ep [Epidemiology]  
 KW - Wounds and Injuries/cl [Classification]  
 KW - Wounds and Injuries/ep [Epidemiology]  
 KW - Wounds and Injuries/et [Etiology]  
 KW - Wounds and Injuries/pc [Prevention & Control]  
 RP - NOT IN FILE  
 SP - 100  
 EP - 103  
 JA - Injury Prevention  
 VL - 3  
 IS - 2  
 CY - ENGLAND  
 N2 - OBJECTIVES: To review playground injury statistics over a five year period in order to develop an awareness of how and where children in the United States are being injured. METHODS: All data are based on the United States Consumer Product Safety Commission's National Electronic Injury Surveillance System (NEISS) for playground related injuries during 1990-4. The surveillance data includes injuries recorded in more than 90 hospital emergency departments located throughout the United States. RESULTS: Each year there are roughly 211,000 preschool or elementary school-children in the United States who receive emergency department care for injuries associated with playground equipment. On average, 17 of these cases result in death. 70% of all injuries occur on public playgrounds, with nearly one third classified as severe. Swings, climbers, and slides are the pieces of playground equipment associated with 88% of all NEISS reported injuries. Falls to the surface are responsible for 70%. CONCLUSIONS: NEISS playground injury statistics contribute to our understanding of playground injuries. By identifying where and how children are injured, suggestions can be made in an attempt to make playgrounds safer  
 SN - 1353-8047  
 AD - National Program for Playground Safety, University of Northern Iowa, School of Health, Physical Education, and Leisure Services, Cedar Falls 50614-0161, USA  
 UR - 9213154  
 ER -  
  
 TY - JOUR  
 ID - 422  
 T1 - Factors parents use in selecting play spaces for young children  
 A1 - Sallis,J.F.  
 A1 - McKenzie,T.L.  
 A1 - Elder,J.P.

A1 - Broyles,S.L.

A1 - Nader,P.R.

Y1 - 1997/04//

N1 - Sallis, J F. McKenzie, T L. Elder, J P. Broyles, S L. Nader, P R

Archives of pediatrics & adolescent medicine

9422751, bwf

AIM, IM

Comparative Study. Journal Article. Research Support, U.S. Gov't, P.H.S.

English

KW - Medline

KW - Adult

KW - California

KW - Child

KW - Preschool

KW - Data Collection

KW - Decision Making

KW - European Continental Ancestry Group/px [Psychology]

KW - Female

KW - Humans

KW - Male

KW - Mexican Americans/px [Psychology]

KW - Parents/px [Psychology]

KW - Play and Playthings

KW - Safety

KW - Socioeconomic Factors

RP - NOT IN FILE

SP - 414

EP - 417

JF - Archives of Pediatrics & Adolescent Medicine

JA - Arch.Pediatr Adolesc Med

VL - 151

IS - 4

CY - UNITED STATES

N2 - BACKGROUND: The amount of time children spend in play spaces (ie, physical locations that are appropriate for children's physical activity) near their homes is correlated with their level of physical activity.

OBJECTIVE: To examine factors used in parents' decisions about the selection of play spaces for their children.

SUBJECTS: Parents (primarily mothers) of 178 Mexican American and 122 white children who were a mean age of 4.9 years old at the first measurement. MEASURES: In individual interviews, parents rated 24 factors on their importance in selecting for their children a play space that is away from their home or yard. Decision

factors were rated from 1 (ie, not important at all) to 5 (ie, very important). RESULTS: The most important factors, with ratings ranging from 4.8 to 4.2, were safety and availability of toilets, drinking water, lighting, and shade. Mexican American parents rated 8 of 24 items significantly higher than did white parents, including

lighted at night, organized activities, play supplies, and drinking water. White parents rated 5 of 24 items significantly higher than did Mexican American parents, including distance from home, cost of admission, and

child's friends go there. The rated importance of 7 of 24 items increased during 1 year, including play supplies, drinking water, distance from home, and parents' friends or relatives go there. CONCLUSIONS: These results

indicate that parents can identify factors they use in selecting places for their young children to play, and selection factors differ somewhat by ethnicity or socioeconomic status. Further studies are needed to determine

whether improvements on the most important selection factors might be effective in increasing the use of play spaces by children and their parents. Clinicians may be able to use the most highly rated decision factors to help

parents assess the acceptability of play spaces in their areas

SN - 1072-4710

AD - Department of Psychology, San Diego State University, USA

UR - 9111442

ER -

TY - JOUR

ID - 423

T1 - Peer assessment of social reputation in community samples of disruptive and nondisruptive children: utility of the revised class play method

A1 - Realmuto,G.M.

A1 - August,G.J.

A1 - Sieler,J.D.

A1 - Pessoa-Brandao,L.

Y1 - 1997/03//

N1 - Realmuto, G M. August, G J. Sieler, J D. Pessoa-Brandao, L

Journal of clinical child psychology

co7, 7603095

IM

Comparative Study. Journal Article. Research Support, U.S. Gov't, P.H.S.

English

KW - Medline

KW - Child

KW - Female

KW - Humans

KW - Longitudinal Studies

KW - Male

KW - Peer Group

KW - Social Behavior Disorders/di [Diagnosis]

KW - Social Behavior Disorders/px [Psychology]

KW - Social Desirability

RP - NOT IN FILE

SP - 67

EP - 76

JF - Journal of Clinical Child Psychology

JA - J Clin.Child Psychol.

VL - 26

IS - 1

CY - UNITED STATES

N2 - Examined the psychometric properties of the Revised Class Play (RCP), a peer assessment measure of social reputation, in epidemiological samples of disruptive (n = 220) and nondisruptive (n = 104) children in Grades 2 through 5. Principal components analyses yielded a four-factor solution that was similar for disruptive and nondisruptive children and to previous research with this instrument. Discriminative function analyses demonstrated that the four RCP dimensions were each successful in predicting group membership, with the leadership and social etiquette dimensions best able to differentiate disruptive and nondisruptive groups.

Regression modeling showed that the variance accounted for by the four RCP dimensions was large and varied for specific dimensions based on the criterion variable chosen. The advantages of the RCP as a device for tracking social competence and peer reputation in high-risk disruptive children are discussed

SN - 0047-228X

AD - Division of Child and Adolescent Psychiatry, University of Minnesota, Minneapolis, USA

UR - 9118177

ER -

TY - JOUR

ID - 424

T1 - Prevention and management of aerodigestive foreign body injuries in childhood. [Review] [13 refs]

A1 - Reilly,J.S.

A1 - Cook,S.P.

A1 - Stool,D.

A1 - Rider,G.

Y1 - 1996/12//

N1 - Reilly, J S. Cook, S P. Stool, D. Rider, G

Pediatric clinics of North America

om, 0401126

AIM, IM

Journal Article. Review

English

KW - Medline

KW - Age Distribution

KW - Bronchoscopy

KW - Child

KW - Preschool

KW - Computer Simulation

KW - Esophagoscopy

KW - Esophagus/in [Injuries]

KW - Esophagus

KW - Foreign Bodies/di [Diagnosis]

KW - Foreign Bodies/ep [Epidemiology]

KW - Foreign Bodies/th [Therapy]

KW - Humans

KW - Infant

KW - Newborn

KW - Larynx/in [Injuries]

KW - Larynx

KW - Play and Playthings

KW - Risk Factors

KW - Safety

RP - NOT IN FILE

SP - 1403

EP - 1411

JF - Pediatric Clinics of North America

JA - Pediatr Clin.North Am

VL - 43

IS - 6

CY - UNITED STATES

N2 - Pediatricians have a critical role in the evaluation of children who experience a choking episode and foreign body injury. Familiarity with important symptoms and signs improves diagnostic skills and complements radiographic evaluation. Further reduction in injury prevention is assisted by parental education and avoidance of objects and foods that produce the greatest risk. Design modifications of toys and other products for children's use is the next important step in this safety process. [References: 13]

SN - 0031-3955

AD - Department of Pediatrics, Alfred I. duPont Hospital for Children, Wilmington, Delaware, USA

UR - 8973519

ER -

TY - JOUR

ID - 425

T1 - A nursing intervention to ensure a safe playground environment

A1 - McEvoy,M.

A1 - Montana,B.

A1 - Panettieri,M.

Y1 - 1996/09//

N1 - McEvoy, M. Montana, B. Panettieri, M

Journal of pediatric health care : official publication of National Association of Pediatric Nurse Associates & Practitioners

jml, 8709735

N

Journal Article

English

KW - Medline

KW - Child

KW - Child Behavior

KW - Humans

KW - Nurse Practitioners/og [Organization & Administration]

KW - Nursing Assessment

KW - Pediatric Nursing/og [Organization & Administration]

KW - Pilot Projects

KW - Play and Playthings

KW - Safety

KW - School Nursing/og [Organization & Administration]

KW - Wounds and Injuries/pc [Prevention & Control]

RP - NOT IN FILE

SP - 209

EP - 216

JF - Journal of Pediatric Health Care

JA - J Pediatr Health Care

VL - 10

IS - 5

CY - UNITED STATES

N2 - Unintentional injuries sustained on school playgrounds are a continual problem not only for children but also for the school nurses who are concerned with their safety. A group of school nurses organized by the local health department's pediatric nurse practitioner responded proactively to this problem by enlisting both school officials and students to accept joint responsibility for a safe play environment. The school nurses assisted the staff in providing a safe play environment and encouraged the students to behave in a safe and acceptable manner on the playground. The nurses developed (a) a Playground Safety Assessment Guide for the school staff to establish and maintain a safe play environment, (b) an in-service session for playground monitors to learn how to supervise children at recess, and (c) a student-oriented program for the children to improve behavior on the playground based on a program conceived by Utah State University (Daug & Fukui, 1988). School nurses and pediatric nurse practitioners can use this program as a model for other schools to improve the physical play environment and behavior of the children at recess

SN - 0891-5245

UR - 8920353

ER -

TY - JOUR

ID - 426

T1 - Can emotions and themes in children's play predict behavior problems?

A1 - Warren,S.L.

A1 - Oppenheim,D.

A1 - Emde,R.N.

Y1 - 1996/10//

N1 - Warren, S L. Oppenheim, D. Emde, R N

Journal of the American Academy of Child and Adolescent Psychiatry

hg5, 8704565

IM

Journal Article. Research Support, Non-U.S. Gov't. Research Support, U.S. Gov't, P.H.S.

English

KW - Medline

KW - Child Behavior Disorders/di [Diagnosis]

KW - Child Behavior Disorders/px [Psychology]

KW - Child

KW - Preschool

KW - Emotions



KW - Female  
KW - Humans  
KW - Internal-External Control  
KW - Male  
KW - Personality Assessment  
KW - Play and Playthings  
KW - Risk Factors  
RP - NOT IN FILE  
SP - 1331  
EP - 1337  
JF - Journal of the American Academy of Child & Adolescent Psychiatry  
JA - J Am Acad.Child Adolesc Psychiatry  
VL - 35  
IS - 10  
CY - UNITED STATES  
N2 - OBJECTIVE: To empirically test whether systematic examination of emotions and themes in children's play can provide useful information about childhood problems. METHOD: Using the MacArthur Story-Stem Battery and coding system, distress and destructive themes (aggression, personal injury, and atypical negative responses) were coded from the play of 51 children at ages 3, 4, and 5 years, in a low-risk, nonclinical volunteer sample. To measure behavior problems, both parents completed the Child Behavior Checklist at all ages, and teachers completed the Teacher's Report Form when the children reached 5 years of age. RESULTS: Both distress and destructive themes in the play of 4- and 5-year-olds were found to correlate with externalizing behavior problems as rated by parents and teachers. CONCLUSIONS: Children who display more distress during play at 4 and 5 years of age and who demonstrate destructive themes at 4 and 5 years of age appear to have more externalizing behavior problems, as rated by their parents and teachers. These results provide empirical support for the use of play as an assessment tool in young children. The findings suggest approaches to and limitations of play interpretation  
SN - 0890-8567  
AD - Division of Child and Adolescent Psychiatry, University of Minnesota, Minneapolis 55455, USA  
UR - 8885587  
ER -  
  
TY - JOUR  
ID - 427  
T1 - Effects of prenatal exposure to opioids on focused attention in toddlers during free play  
A1 - Schneider,J.W.  
A1 - Hans,S.L.  
Y1 - 1996/08//  
N1 - Schneider, J W. Hans, S L  
Journal of developmental and behavioral pediatrics : JDBP  
htf, 8006933  
IM  
Journal Article  
English  
KW - Medline  
KW - Attention/de [Drug Effects]  
KW - Child  
KW - Preschool  
KW - Female  
KW - Heroin/ae [Adverse Effects]  
KW - Heroin Dependence/rh [Rehabilitation]  
KW - Humans  
KW - Male  
KW - Methadone/ae [Adverse Effects]  
KW - Methadone/tu [Therapeutic Use]  
KW - Mother-Child Relations

KW - Narcotics/ae [Adverse Effects]

KW - Narcotics/tu [Therapeutic Use]

KW - Play and Playthings

KW - Pregnancy

KW - Prenatal Exposure Delayed Effects

RP - NOT IN FILE

SP - 240

EP - 247

JF - Journal of Developmental & Behavioral Pediatrics

JA - J Dev.Behav Pediatr

VL - 17

IS - 4

CY - UNITED STATES

N2 - The goals of this study were: (1) to determine if 24-month-old children exposed to opioids show decreased focused attention during free play compared with children of the same age who were not prenatally exposed; (2) to identify medical and social risk factors other than drug exposure that are related to focused attention; and (3) to determine if mothers' teaching ability had an effect on attention. Focused attention was rated during a 3-minute free play session for 30 toddlers who were methadone-exposed and for 44 comparison toddlers. The mother teaching the child to use a toy was also rated separately from the free play session. There was no difference in focused attention of 24 month olds during free play based only on prenatal exposure. Despite group differences in medical and social risk factors, only maternal IQ was significantly related to focused attention. Maternal instruction was strongly related to focused attention and mediated the effects of maternal IQ on attention

SN - 0196-206X

AD - Northwestern University Medical Center, Program in Physical Therapy, Children's Memorial Medical Center, Chicago, IL 60611, USA

UR - 8856519

ER -

TY - JOUR

ID - 428

T1 - A firearm safety program for children: they just can't say no

A1 - Hardy,M.S.

A1 - Armstrong,F.D.

A1 - Martin,B.L.

A1 - Strawn,K.N.

Y1 - 1996/08//

N1 - Hardy, M S. Armstrong, F D. Martin, B L. Strawn, K N

Journal of developmental and behavioral pediatrics : JDBP

htf, 8006933

IM

Clinical Trial. Journal Article. Randomized Controlled Trial. Research Support, Non-U.S. Gov't  
English

KW - Medline

KW - Aggression/px [Psychology]

KW - Child

KW - Preschool

KW - Female

KW - Firearms

KW - Health Education

KW - Humans

KW - Male

KW - Play and Playthings

KW - Risk Factors

KW - Safety

KW - Treatment Outcome

KW - Wounds

KW - Gunshot/pc [Prevention & Control]

KW - Gunshot/px [Psychology]

RP - NOT IN FILE

SP - 216

EP - 221

JF - Journal of Developmental & Behavioral Pediatrics

JA - J Dev.Behav Pediatr

VL - 17

IS - 4

CY - UNITED STATES

N2 - The purpose of this study was to compare children's play and aggressive behavior with firearms before and after an information-based intervention. Correlates of aggression and gun play were also analyzed. Subjects were 24 pairs of preschool children videotaped for 10 minutes in a structured play setting, in which they had access to a variety of toys and to real and toy guns. One child from each dyad was then exposed to an information-based intervention and told not to play with guns. The children were again videotaped in the same setting approximately 1 week later. Results indicated that the intervention was ineffective in modifying the behavior of the children. Regression analyses revealed that access to a parent's firearm was correlated with gun play and that gun play and handling of firearms in the home were correlated with aggressive behavior. The findings in this study represent the first systematic attempt to decrease gun play in children and suggest that information provision alone is an insufficient intervention

SN - 0196-206X

AD - Department of Psychology, University of North Carolina at Charlotte 28223, USA

UR - 8856516

ER -

TY - JOUR

ID - 429

T1 - Foster home environments: a preliminary report

A1 - Simms,M.D.

A1 - Horwitz,S.M.

Y1 - 1996/06//

N1 - Simms, M D. Horwitz, S M

Journal of developmental and behavioral pediatrics : JDBP

htf, 8006933

IM

Journal Article. Research Support, U.S. Gov't, P.H.S.

English

KW - Medline

KW - Adult

KW - Affective Symptoms/di [Diagnosis]

KW - Affective Symptoms/px [Psychology]

KW - Child

KW - Child Behavior Disorders/di [Diagnosis]

KW - Child Behavior Disorders/px [Psychology]

KW - Preschool

KW - Connecticut

KW - Developmental Disabilities/di [Diagnosis]

KW - Developmental Disabilities/px [Psychology]

KW - Female

KW - Foster Home Care/px [Psychology]

KW - Humans

KW - Longitudinal Studies

KW - Male

KW - Middle Aged

KW - Parenting/px [Psychology]

KW - Prospective Studies  
KW - Psychosocial Deprivation  
KW - Risk Factors  
KW - Social Environment  
KW - Socioeconomic Factors  
RP - NOT IN FILE  
SP - 170  
EP - 175  
JF - Journal of Developmental & Behavioral Pediatrics  
JA - J Dev.Behav Pediatr  
VL - 17  
IS - 3  
CY - UNITED STATES

N2 - This study evaluated the quality of developmental and emotional stimulation available to young children in their first foster home placement. Visits were made to 28 of 34 (82%) homes of children ages 2 to 6 years who were enrolled in a prospective study of foster care. Based on the results of the Home Observation for Measurement of the Environment (HOME) scale, 18% of homes were found to be understimulating. Multivariate analysis revealed that low HOME scores were related only to income level and not to other foster parent characteristics. Subscale scores showed that low HOME scores were due largely to lack of adequate play materials and limited interaction between the foster parents and the children. These results demonstrate great variability in the quality of foster home environments. Adjusting foster care subsidies according to foster parents' income levels, providing age-appropriate books and play materials, and additional training of foster parents should increase the developmental and emotional stimulation available to foster children

SN - 0196-206X  
AD - Department of Pediatrics, Medical College of Wisconsin, Milwaukee, USA  
UR - 8783063  
ER -

TY - JOUR  
ID - 430  
T1 - Ethical principles in federal regulations: the case of children and research risks  
A1 - Williams,P.C.  
Y1 - 1996/04//  
N1 - Williams, P C  
The Journal of medicine and philosophy  
izd, 7610512  
E, IM  
Journal Article  
English  
KW - Medline  
KW - Adolescent  
KW - Adult  
KW - Advisory Committees  
KW - Body Height/de [Drug Effects]  
KW - Child  
KW - Preschool  
KW - Dwarfism/dt [Drug Therapy]  
KW - Dwarfism/et [Etiology]  
KW - Ethical Review  
KW - Ethics Committees  
KW - Research  
KW - Ethics  
KW - Medical  
KW - Federal Government  
KW - Female  
KW - Government Regulation

KW - Growth Hormone/tu [Therapeutic Use]  
KW - Health  
KW - Humans  
KW - Informed Consent/lj [Legislation & Jurisprudence]  
KW - Male  
KW - Nontherapeutic Human Experimentation  
KW - Placebos/tu [Therapeutic Use]  
KW - Randomized Controlled Trials as Topic/lj [Legislation & Jurisprudence]  
KW - Recombinant Proteins/tu [Therapeutic Use]  
KW - Risk Assessment  
KW - Social Responsibility  
KW - Social Values  
KW - Treatment Outcome  
RP - NOT IN FILE  
SP - 169  
EP - 186  
JF - Journal of Medicine & Philosophy  
JA - J Med Philos.  
VL - 21  
IS - 2  
CY - NETHERLANDS  
N2 - Ethical principles play an important part not only in the promulgation of regulations but also in their application, i.e., enforcement and adjudication. while traditional ethical principles--promotion of welfare, freedom, and fairness--play an important role in both elements of regulation, some other kinds of ethical principles are significant as well. Principles governing the structure of decision processes should shape the structure and actions of agencies; principles of wise application should govern the work of those whose responsibility it is to apply regulatory language to particular situations. These points are demonstrated by investigating a case study: federal regulations designed to protect children involved in scientific research applied to a placebo study of the effects of recombinant human growth hormone on children of extremely short stature  
SN - 0360-5310  
AD - Department of Preventive Medicine, School of Medicine, S.U.N.Y.- Stony Brook, USA  
UR - 8739071  
ER -  
  
TY - JOUR  
ID - 431  
T1 - Small parts aspiration, ingestion, and choking in small children: findings of the small parts research project  
A1 - Rider,G.  
A1 - Wilson,C.L.  
Y1 - 1996/06//  
N1 - Rider, G. Wilson, C L  
Risk analysis : an official publication of the Society for Risk Analysis  
8109978, ria  
IM  
Journal Article  
English  
KW - Medline  
KW - Adolescent  
KW - Age Distribution  
KW - Airway Obstruction/et [Etiology]  
KW - Airway Obstruction/mo [Mortality]  
KW - Child  
KW - Preschool  
KW - Consumer Product Safety  
KW - Data Interpretation  
KW - Statistical

KW - Foreign Bodies  
KW - Humans  
KW - Infant  
KW - Newborn  
KW - Inhalation  
KW - Play and Playthings/in [Injuries]  
KW - Risk Assessment  
KW - Safety  
KW - United States/ep [Epidemiology]  
RP - NOT IN FILE  
SP - 321  
EP - 330  
JF - Risk Analysis  
JA - Risk Anal.  
VL - 16  
IS - 3  
CY - UNITED STATES

N2 - Obtaining information on current child injury trends and their associated issues is an important factor in developing products that meet or surpass acceptable toy safety boundaries. Understanding these boundaries helps determine safe product design characteristics that reduce the risk of product-related injury. Inchcape Testing Services developed a Small Parts Aspiration, Ingestion, and Choking Hazards Research Project, independent of an ongoing consumer Product Safety Commission (CPSC) project. The project's purpose was to determine, independent of CPSC, whether a more stringent small parts regulatory standard was necessary and, if so, to ensure that the standard was determined objectively. This article reports on the project's findings relating to critical characteristics (size, shape, and consistency) relative to the victim's age, of objects responsible for child choking injuries and fatalities

SN - 0272-4332

AD - Inchcape Testing Services, Risk Analysis & Management, Moonachie, New Jersey 07074, USA

UR - 8693159

ER -

TY - JOUR

ID - 432

T1 - The role of dietary fiber in the development and treatment of childhood obesity. [Review] [51 refs]

A1 - Kimm,S.Y.

Y1 - 1995/11//

N1 - Kimm, S Y

Pediatrics

oxv, 0376422

AIM, IM

Comparative Study. Journal Article. Review

English

KW - Medline

KW - Child

KW - Chronic Disease

KW - Developing Countries

KW - Diet

KW - Reducing

KW - Dietary Fats/ad [Administration & Dosage]

KW - Dietary Fiber/ad [Administration & Dosage]

KW - Dietary Fiber/tu [Therapeutic Use]

KW - Digestion

KW - Educational Status

KW - Energy Intake

KW - Environment

KW - Female

KW - Health Promotion

KW - Humans

KW - Obesity/dh [Diet Therapy]

KW - Obesity/et [Etiology]

KW - Obesity/ge [Genetics]

KW - Poverty

KW - Preventive Medicine

KW - Research Design

KW - United States

KW - Weight Loss

RP - NOT IN FILE

SP - 1010

EP - 1014

JA - Pediatrics

VL - 96

IS - 5 Pt 2

CY - UNITED STATES

N2 - Childhood obesity is viewed as a public health problem in the United States because of its assumed high prevalence and increasing secular trend. The best estimate of the genetic contribution to obesity ranges from 5% to 25%. Environmental factors play a major role in obesity development. Low income and a low level of education have been associated with obesity, particularly among white women. Caloric intake as a risk factor for obesity has not been clearly established. This lack of a clear-cut association may be attributable to the problem of accurately measuring caloric intake. Several studies have linked increased total fat intake, rather than caloric intake, with obesity. Some studies have linked television viewing to obesity in children. Obesity is rare among the populations of developing countries, where dietary fiber intake is high. Explanations for the role of dietary fiber in obesity include a reduced caloric density of the foods, a slower rate of food ingestion, and possible effects on satiety. Most studies on the role of fiber in the treatment of obesity have been somewhat limited by lack of comparison groups, inadequate sample sizes, and short durations of the observations. However, although limited, the available evidence suggests that fiber potentially could play a useful role in weight reduction. For children, fiber administration should be considered as an adjuvant therapy rather than a primary modality, because fiber might aid in promoting satiety during meals and curbing hunger between meals.(ABSTRACT TRUNCATED AT 250 WORDS) [References: 51]

SN - 0031-4005

AD - Department of Family Medicine and Clinical Epidemiology, School of Medicine, University of Pittsburgh, USA

UR - 7494672

ER -

TY - JOUR

ID - 433

T1 - Firesetting during the preschool period: assessment and intervention issues

A1 - Hanson,M.

A1 - Mackay,S.

A1 - Atkinson,L.

A1 - Staley,S.

A1 - Pignatiello,A.

Y1 - 1995/08//

N1 - Hanson, M. Mackay, S. Atkinson, L. Staley, S. Pignatiello, A  
Canadian journal of psychiatry. Revue canadienne de psychiatrie  
clr, 7904187

IM

Case Reports. Journal Article. Research Support, Non-U.S. Gov't  
English

KW - Medline

KW - Attention Deficit Disorder with Hyperactivity/di [Diagnosis]

KW - Attention Deficit Disorder with Hyperactivity/px [Psychology]

KW - Attention Deficit Disorder with Hyperactivity/th [Therapy]  
KW - Behavior Therapy  
KW - Burns/pc [Prevention & Control]  
KW - Burns/px [Psychology]  
KW - Child Behavior Disorders/di [Diagnosis]  
KW - Child Behavior Disorders/px [Psychology]  
KW - Child Behavior Disorders/th [Therapy]  
KW - Child  
KW - Preschool  
KW - Family/px [Psychology]  
KW - Fatal Outcome  
KW - Firesetting Behavior/pc [Prevention & Control]  
KW - Firesetting Behavior/px [Psychology]  
KW - Humans  
KW - Male  
KW - Personality Assessment  
KW - Play and Playthings  
KW - Sibling Relations  
RP - NOT IN FILE  
SP - 299  
EP - 303  
JF - Canadian Journal of Psychiatry - Revue Canadienne de Psychiatrie  
JA - Can J Psychiatry  
VL - 40  
IS - 6  
CY - CANADA  
N2 - OBJECTIVE: To describe a methodology of assessing preschoolers involved in firesetting incidents, and outline the psychiatric implications of firesetting incidents in young children. METHOD: To outline The Arson Prevention Program for Children and present case vignettes. RESULTS: The heightened risk of burn injury or fatality in fires caused by young children is highlighted and practical suggestions for facilitating the immediate safety of the child and family are presented. CONCLUSION: Despite the popular notion that fire interest and play is relatively benign in young children, the cases show that, as with older children, firesetting in preschoolers can be associated with serious child and/or family psychopathology  
SN - 0706-7437  
AD - Family Court Clinic, Clarke Institute of Psychiatry, Toronto, Ontario  
UR - 7585398  
ER -  
  
TY - JOUR  
ID - 434  
T1 - Developmental testing. [Review] [25 refs]  
A1 - Gilbride,K.E.  
Y1 - 1995/09//  
N1 - Gilbride, K E  
Pediatrics in review / American Academy of Pediatrics  
peo, 8103046  
IM  
Journal Article. Review  
English  
KW - Medline  
KW - Aptitude Tests  
KW - Child  
KW - Child Behavior Disorders/di [Diagnosis]  
KW - Preschool  
KW - Developmental Disabilities/di [Diagnosis]  
KW - Humans



KW - Infant

KW - Learning Disorders/di [Diagnosis]

KW - Psychological Tests

KW - Psychometrics/mt [Methods]

RP - NOT IN FILE

SP - 338

EP - 345

JF - Pediatrics in Review

JA - *Pediatr Rev*

VL - 16

IS - 9

CY - UNITED STATES

N2 - Pediatricians play a central role in monitoring the development of infants and children during the course of providing well child care. Parents turn to pediatricians for help in determining whether their child has a temporary lag in development, a serious delay or disorder, or a significant behavior problem that should be addressed. With the passage of PL 99-457, pediatricians also play a key role in referring children at risk to early intervention services. By employing a strategy of developmental surveillance, with periodic developmental screening, the pediatrician can determine when a child should be referred for more extensive developmental or psychological testing, which will aid in the process of diagnosis and treatment of developmental disabilities and behavioral disturbances. Knowledge of the screening and testing measures used commonly, as well as their limitations, will result in more accurate interpretation of the data derived from such measures. Once delays are diagnosed and treatment is initiated, repeated assessments over time will serve to identify areas in need of continuing intervention while indicating gains made in specific areas of developmental functioning. Throughout this process, the pediatrician's role as advocate for the child and family serves as a bridge to other professionals and services, with the ultimate goal of facilitating the optimal development of the child. [References: 25]

SN - 0191-9601

AD - Harbor-UCLA Medical Center, Torrance, USA

UR - 7567708

ER -

TY - JOUR

ID - 435

T1 - Injury prevention in an urban setting: challenges and successes

A1 - Laraque,D.

A1 - Barlow,B.

A1 - Durkin,M.

A1 - Heagarty,M.

Y1 - 1995///

N1 - Laraque, D. Barlow, B. Durkin, M. Heagarty, M

Bulletin of the New York Academy of Medicine

bqo, 7505398

IM

Journal Article. Research Support, Non-U.S. Gov't. Research Support, U.S. Gov't, P.H.S.

English

KW - Medline

KW - Accident Prevention

KW - Adolescent

KW - Adult

KW - Burns/pc [Prevention & Control]

KW - Child

KW - Community-Institutional Relations

KW - Consumer Participation

KW - Environment

KW - Government Agencies

KW - Health Care Coalitions

KW - Health Education

KW - Humans  
 KW - New York City  
 KW - Organizational Objectives  
 KW - Outcome Assessment (Health Care)  
 KW - Parents  
 KW - Personnel  
 KW - Hospital  
 KW - Play and Playthings  
 KW - Program Development  
 KW - Program Evaluation  
 KW - Safety  
 KW - Schools  
 KW - Stress  
 KW - Physiological/pc [Prevention & Control]  
 KW - Urban Health Services  
 KW - Violence  
 KW - Wounds and Injuries/pc [Prevention & Control]  
 RP - NOT IN FILE  
 SP - 16  
 EP - 30  
 JF - Bulletin of the New York Academy of Medicine  
 JA - Bull.N.Y.Acad.Med  
 VL - 72  
 IS - 1  
 CY - UNITED STATES

N2 - The Harlem Hospital Injury Prevention Program (HHIPP) was established in 1988 with the goal of reducing injuries to children in central Harlem by providing safe play areas, supervised activities, and injury prevention education. To achieve this goal, a broad-based coalition was formed with state and local governmental agencies interested in injury prevention and with community groups, schools, parents, and hospital staff. An evaluation of the program in terms of both process and outcome formed a critical element of this effort. Since 1988 the HHIPP, as the lead agency for the Healthy Neighborhoods/Safe Kids Coalition, developed or participated in two types of programs: injury-prevention education programs and programs that provide safe activities and/or environments for children. The educational programs included Window Guards campaign; Safety City Program; Kids, Injuries and Street Smarts Program (KISS); Burn Prevention Curriculum and Smoke Detector Distribution; Harlem Alternative to Violence Program; Adolescent Outreach Program; and Critical Incident Stress Management Teams. The safe activities and environmental programs included the Bicycle Safety Program/Urban Youth Bike Corps; Playground Injury Prevention Program; the Greening of Harlem Program; the Harlem Horizon Art Studio; Harlem Hospital Dance Clinic; Unity through Murals project; baseball at the Harlem Little League; winter baseball clinic; and the soccer league. Each program was conceived using injury data, coupled with parental concern and activism, which acted as catalysts to create a community coalition to respond to a specific problem. Data systems developed over time, which monitored the prevalence and incidence of childhood injuries in northern Manhattan, including central Harlem, became essential not only to identify specific types of childhood injuries in this community but also to evaluate these programs for the prevention of injuries in children

SN - 0028-7091

AD - Harlem Hospital Center, Columbia University College of Physicians and Surgeons, USA

UR - 7581311

ER -

TY - JOUR

ID - 436

T1 - Parent-child interactions in alcoholic and nonalcoholic families

A1 - Whipple,E.E.

A1 - Fitzgerald,H.E.

A1 - Zucker,R.A.

Y1 - 1995/01//

N1 - Whipple, E E. Fitzgerald, H E. Zucker, R A

The American journal of orthopsychiatry

3r6, 0400640

IM

Journal Article. Research Support, Non-U.S. Gov't. Research Support, U.S. Gov't, P.H.S.

English

KW - Medline

KW - Child of Impaired Parents/px [Psychology]

KW - Child

KW - Preschool

KW - Humans

KW - Male

KW - Parent-Child Relations

KW - Personality Assessment

KW - Personality Development

KW - Play and Playthings

KW - Risk Factors

RP - NOT IN FILE

SP - 153

EP - 159

JF - American Journal of Orthopsychiatry

JA - Am J Orthopsychiatry

VL - 65

IS - 1

CY - UNITED STATES

N2 - A community-recruited sample of alcoholic and nonalcoholic families was videotaped in a standardized play task involving parents and their preschool-aged sons. Microanalyses revealed that alcoholic families had lower dyadic synchrony, that parents were viewed as less able to engage their children, and that the coders liked the control parents and children more. Variations in the parent-child interactions are discussed

SN - 0002-9432

AD - School of Social Work, Michigan State University, East Lansing, USA

UR - 7733211

ER -

TY - JOUR

ID - 437

T1 - [Sensorineural hearing loss in children starting school. Results of a representative hearing screening study]. [German]

A1 - Kruppa,B.

A1 - Dieroff,H.G.

A1 - Ising,H.

Y1 - 1995/01//

N1 - Kruppa, B. Dieroff, H G. Ising, H

HNO

g9p, 2985099r

IM

English Abstract. Journal Article

German

KW - Medline

KW - Audiometry

KW - Pure-Tone

KW - Auditory Threshold

KW - Child

KW - Cross-Sectional Studies

KW - Female

KW - Germany/ep [Epidemiology]

KW - Hearing Loss/di [Diagnosis]  
KW - Hearing Loss/ep [Epidemiology]  
KW - Hearing Loss/et [Etiology]  
KW - Hearing Loss  
KW - Bilateral/di [Diagnosis]  
KW - Bilateral/ep [Epidemiology]  
KW - Bilateral/et [Etiology]  
KW - High-Frequency/di [Diagnosis]  
KW - High-Frequency/ep [Epidemiology]  
KW - High-Frequency/et [Etiology]  
KW - Sensorineural/di [Diagnosis]  
KW - Sensorineural/ep [Epidemiology]  
KW - Sensorineural/et [Etiology]  
KW - Humans  
KW - Incidence  
KW - Male  
KW - Mass Screening  
KW - Play and Playthings  
KW - Risk Factors  
RP - NOT IN FILE  
SP - 31  
EP - 34  
JF - HNO  
VL - 43  
IS - 1  
CY - GERMANY  
N2 - Audiograms in the 0.5-6 kHz frequency range were taken, using improved audiometric screening methods, in 2032 children, 6-7 years old, who were undergoing their pre-school medical examinations. In 151 children (7.4%), the threshold for hearing was above 20 dB for at least one frequency. Of these, 82 children (4% of the overall sample) had a hearing impairment defined as a difference of  $\geq 10$  dB between at least one frequency (3, 4 or 6 kHz) and the mean value from 1+2 kHz. This was evaluated as a sensorineural hearing loss. Unilateral losses (lateral difference  $\geq 10$  dB) were more common than bilateral losses (2.5% vs 1.6% of the overall sample). These unilateral hearing losses in the high-frequency range are essentially regarded as the result of playing with impulse-noise producing toys, such as toy guns with caps  
SN - 0017-6192  
AD - Umweltbundesamt, Institut für Wasser-, Boden- und Lufthygiene, Berlin  
UR - 7890549  
ER -  
  
TY - JOUR  
ID - 438  
T1 - Identifying video game addiction in children and adolescents  
A1 - Fisher,S.  
Y1 - 1994/09//  
N1 - Fisher, S  
Addictive behaviors  
2gw, 7603486  
IM  
Journal Article. Research Support, Non-U.S. Gov't  
English  
KW - Medline  
KW - Adolescent  
KW - Behavior  
KW - Addictive/di [Diagnosis]  
KW - Addictive/px [Psychology]  
KW - Child

KW - Female  
KW - Gambling/px [Psychology]  
KW - Humans  
KW - Male  
KW - Personality Inventory/sn [Statistics & Numerical Data]  
KW - Play and Playthings  
KW - Psychometrics  
KW - Reproducibility of Results  
KW - Risk Factors  
RP - NOT IN FILE  
SP - 545  
EP - 553  
JF - Addictive Behaviors  
JA - Addict.Behav  
VL - 19  
IS - 5  
CY - ENGLAND  
N2 - There is a current trend of thought among some scholars of gambling that arcade video game playing in some adolescents may develop into a behavior which resembles a gambling addiction. A scale, developed to identify arcade video game addiction in adolescents, was administered to 467 secondary school children in a coastal town in the UK. Initial psychometric tests show that the scale has acceptable internal consistency reliability and factorial validity, and is significantly related to alternative means of assessing excessive video game play. The implications of the study findings are discussed together with its limitations and suggestions for future research  
SN - 0306-4603  
AD - Department of Applied Social Science, University of Plymouth, Devon, UK  
UR - 7832013  
ER -  
  
TY - JOUR  
ID - 439  
T1 - [Early indications for partial learning disorders--anamnestic and diagnostic strategies]. [German]  
A1 - Michaelis,R.  
A1 - Niemann,G.  
A1 - Schoning,M.  
Y1 - 1994/10//  
N1 - Michaelis, R. Niemann, G. Schoning, M  
Gesundheitswesen (Bundesverband der Ärzte des Öffentlichen Gesundheitsdienstes (Germany))  
bfd,9204210  
IM  
English Abstract. Journal Article  
German  
KW - Medline  
KW - Child  
KW - Preschool  
KW - Developmental Disabilities/di [Diagnosis]  
KW - Developmental Disabilities/pc [Prevention & Control]  
KW - Dyslexia/di [Diagnosis]  
KW - Dyslexia/pc [Prevention & Control]  
KW - Female  
KW - Humans  
KW - Language Development Disorders/di [Diagnosis]  
KW - Language Development Disorders/pc [Prevention & Control]  
KW - Learning Disorders/di [Diagnosis]  
KW - Learning Disorders/pc [Prevention & Control]  
KW - Male

KW - Medical History Taking  
KW - Neuropsychological Tests  
KW - Play and Playthings  
KW - Risk Factors  
RP - NOT IN FILE  
SP - 534  
EP - 536  
JF - Gesundheitswesen  
VL - 56  
IS - 10  
CY - GERMANY

N2 - A surprisingly small amount of information exists about early symptoms of learning disorders becoming evident during the first years at school. Only one relation seems to carry some degree of reliability: Early language deficits and/or retardation of language acquisition and later learning disorders including dyslexia. Because of these limitations, a more pragmatic approach is recommended. Questionnaires can be used asking for specific and age-related skills, involving the existence and good functioning of strategically working and concept-building central structures. Children with deficits in these structures will develop and experience dysfunctions in their cognitive, social and motor abilities. Consequently, they present behavioural problems. Children whose questionnaires offer suspicion in respect of specific dysfunctions should be tested by means of structured play tests or by appropriate developmental tests, to determine their individual patterns of talents and specific shortcomings. An early therapeutic intervention, aimed at the child's specific and individual deficits, may prevent or reduce learning problems at school

SN - 0941-3790

AD - Abteilung Neuropadiatrie, Entwicklungsneurologie, Sozialpadiatrie Universitätskinderklinik Tübingen

UR - 7528582

ER -

TY - JOUR

ID - 440

T1 - The Central Harlem playground injury prevention project: a model for change

A1 - Laraque,D.

A1 - Barlow,B.

A1 - Davidson,L.

A1 - Welborn,C.

Y1 - 1994/10//

N1 - Laraque, D. Barlow, B. Davidson, L. Welborn, C

American journal of public health

1254074, 3xw

AIM, IM

News

English

KW - Medline

KW - Adolescent

KW - Child

KW - Humans

KW - New York City

KW - Play and Playthings

KW - Safety

KW - Urban Health

KW - Wounds and Injuries/pc [Prevention & Control]

RP - NOT IN FILE

SP - 1691

EP - 1692

JF - American Journal of Public Health

JA - Am J Public Health

VL - 84

IS - 10

CY - UNITED STATES

SN - 0090-0036

UR - 7943500

ER -

TY - JOUR

ID - 441

T1 - Activity-based intervention and direct instruction: a comparison study

A1 - Losardo,A.

A1 - Bricker,D.

Y1 - 1994/05//

N1 - Losardo, A. Bricker, D

American journal of mental retardation : AJMR

ame, 8800463

IM

Journal Article

English

KW - Medline

KW - Attention

KW - Child

KW - Preschool

KW - Education of Intellectually Disabled/mt [Methods]

KW - Female

KW - Generalization (Psychology)

KW - Humans

KW - Male

KW - Mental Recall

KW - Play and Playthings

KW - Verbal Learning

KW - Vocabulary

RP - NOT IN FILE

SP - 744

EP - 765

JF - American Journal of Mental Retardation

JA - Am J Ment.Retard.

VL - 98

IS - 6

CY - UNITED STATES

N2 - An alternating treatments design was used to compare the effectiveness of two intervention procedures--direct instruction and activity-based instruction--on the acquisition and generalization of object names by preschool-age children with developmental delays or who were at-risk for such delays. Subjects were given a pretest to determine unknown object names. A systematic alternation of treatments was subsequently provided by trained interventionists. After a baseline period of 1 week, two 15-minute treatment sessions employing activity-based intervention and direct instruction were followed by a 15-minute free-play generalization session, 3 days a week, for 6 weeks. A return to baseline phase was then conducted for 1 week. Structured generalization probes were also administered throughout treatment and 4 weeks after the study ended. Results indicated differential effects for both treatments

SN - 0895-8017

AD - Center on Human Development, University of Oregon, Eugene 97403-1211

UR - 8054203

ER -

TY - JOUR

ID - 442

T1 - Analysis of environmental deprivation: cognitive and social development in Romanian orphans

A1 - Kaler,S.R.

A1 - Freeman,B.J.

Y1 - 1994/05//

N1 - Kaler, S R. Freeman, B J

Journal of child psychology and psychiatry, and allied disciplines

hp3, 0375361

IM

Journal Article. Research Support, U.S. Gov't, P.H.S.

English

KW - Medline

KW - Child

KW - Abandoned/px [Psychology]

KW - Institutionalized/px [Psychology]

KW - Preschool

KW - Developing Countries

KW - Developmental Disabilities/et [Etiology]

KW - Developmental Disabilities/px [Psychology]

KW - Female

KW - Humans

KW - Infant

KW - Intellectual Disability/px [Psychology]

KW - Intelligence Tests/sn [Statistics & Numerical Data]

KW - Male

KW - Personality Assessment/sn [Statistics & Numerical Data]

KW - Personality Development

KW - Play and Playthings

KW - Psychometrics

KW - Psychosocial Deprivation

KW - Risk Factors

KW - Romania

KW - Social Adjustment

KW - SOCIALIZATION

RP - NOT IN FILE

SP - 769

EP - 781

JF - Journal of Child Psychology & Psychiatry & Allied Disciplines

JA - J Child Psychol.Psychiatry

VL - 35

IS - 4

CY - ENGLAND

N2 - The cognitive and social developmental status of a representative group of Romanian orphans between the ages of 23 and 50 months living in the Leagan de Copii in Timisoara, Romania was assessed using a variety of traditional and nontraditional measures. Results indicated that the orphanage sample all exhibited deficits in cognitive and social functioning; the majority were severely delayed. Correlations between the traditional and nontraditional measures indicated that children's delays occurred across domains. Deficits were not related to length of time in the orphanage, age at entrance, Apgar scores, or birthweight. The children's greatest capability was in peer social interaction

SN - 0021-9630

AD - Neuropsychiatric Institute, University of California, Los Angeles

UR - 7518826

ER -

TY - JOUR

ID - 443

T1 - Affective interactions of depressed and nondepressed mothers and their children

A1 - Radke-Yarrow,M.



A1 - Nottelmann,E.

A1 - Belmont,B.

A1 - Welsh,J.D.

Y1 - 1993/12//

N1 - Radke-Yarrow, M. Nottelmann, E. Belmont, B. Welsh, J D

Journal of abnormal child psychology

0364547, h33

IM

Journal Article. Research Support, Non-U.S. Gov't. Research Support, U.S. Gov't, P.H.S.

English

KW - Medline

KW - Affect

KW - Bipolar Disorder/di [Diagnosis]

KW - Bipolar Disorder/px [Psychology]

KW - Child of Impaired Parents/px [Psychology]

KW - Child

KW - Preschool

KW - Depressive Disorder/di [Diagnosis]

KW - Depressive Disorder/px [Psychology]

KW - Female

KW - Gender Identity

KW - Humans

KW - Infant

KW - Male

KW - Mother-Child Relations

KW - Personality Assessment

KW - Personality Development

KW - Play and Playthings

KW - Risk Factors

RP - NOT IN FILE

SP - 683

EP - 695

JF - Journal of Abnormal Child Psychology

JA - J Abnorm.Child Psychol.

VL - 21

IS - 6

CY - UNITED STATES

N2 - The expressed affect of clinically depressed and nondepressed mothers as measured by the Schedule for Affective Disorders and Schizophrenia: Lifetime Version (SADS-L) and their children (1 1/2 to 3 1/2 years) was observed in seminatural situations. The objectives were to investigate how maternal depression enters into affective interactions between mother and child and how the affect patterns of mother and child are related. Forty-nine unipolar and 24 bipolar depressed mothers and 45 nondepressed mothers were observed on 2 days, 2 weeks apart, for a total of 5 h. Each minute was coded for the predominant affect of mother and child. Affects relevant to depression (anxious--said, irritable--angry, downcast, pleasant, tender-affectionate) were coded. Depressed mothers expressed significantly more negative affect than did control mothers. Mothers' expressed affect and their self-reports of affect on days of observation were unrelated. Mother's and child's affects, measured on different days, were significantly correlated. Unipolar mothers and mothers severely depressed spent significantly more time in prolonged bouts of negative affect. There was significant synchrony between their bouts and the negative bouts of their daughters. Gender of child was related to mother's and child's affect, and to relations between mother's and child's affect

SN - 0091-0627

AD - National Institute of Mental Health, Bethesda, Maryland 20892

UR - 8126320

ER -

TY - JOUR

ID - 444  
T1 - Playground safety  
A1 - Leung,A.K.  
A1 - Robson,W.L.  
A1 - Lim,S.H.  
A1 - Chopra,S.  
Y1 - 1993/12//  
N1 - Leung, A K. Robson, W L. Lim, S H. Chopra, S  
Journal of the Royal Society of Health  
jx3, 8303144  
IM  
Journal Article  
English  
KW - Medline  
KW - Accident Prevention  
KW - Child  
KW - Child Welfare  
KW - Equipment Design  
KW - Health Education  
KW - Humans  
KW - Play and Playthings  
KW - Safety  
KW - Surface Properties  
RP - NOT IN FILE  
SP - 320  
EP - 323  
JF - Journal of the Royal Society of Health  
JA - J R Soc Health  
VL - 113  
IS - 6  
CY - ENGLAND  
SN - 0264-0325  
AD - University of Calgary, Canada  
UR - 8308853  
ER -

TY - JOUR  
ID - 445  
T1 - Risk of noise-induced hearing loss following exposure to Chinese firecrackers. [Review] [26 refs]  
A1 - Smoorenburg,G.F.  
Y1 - 1993/11//  
N1 - Smoorenburg, G F  
Audiology : official organ of the International Society of Audiology  
9dv, 1273752  
IM  
Journal Article. Research Support, Non-U.S. Gov't. Review  
English  
KW - Medline  
KW - Adolescent  
KW - Adult  
KW - Auditory Threshold  
KW - Child  
KW - Preschool  
KW - Explosions  
KW - Hearing Loss  
KW - Noise-Induced/ep [Epidemiology]

KW - Noise-Induced/et [Etiology]

KW - Humans

KW - Incidence

KW - Maximum Allowable Concentration

KW - Noise/ae [Adverse Effects]

KW - Play and Playthings

KW - Risk Factors

KW - Sound Spectrography

KW - Time Factors

KW - Tinnitus/et [Etiology]

RP - NOT IN FILE

SP - 333

EP - 343

JF - Audiology

VL - 32

IS - 6

CY - SWITZERLAND

N2 - Firecrackers produce sound impulses reaching peak levels measured at the ear sometimes in excess of 160 dB when fired at 2 m distance. These sound levels are potentially hazardous to the ear. Current damage risk criteria for impulse sounds show that for 10 impulses the peak levels should not exceed 149 dB(lin,peak) at the ear. The A-weighted, impulse (integration time 35 ms) levels should not exceed 125 dB(A,imp) at the ear for 10 impulses. [References: 26]

SN - 0020-6091

AD - TNO Institute for Human Factors, Soesterberg, The Netherlands

UR - 8267524

ER -

TY - JOUR

ID - 446

T1 - Risk of sports activities in children with Down's syndrome and atlantoaxial instability

A1 - Cremers,M.J.

A1 - Bol,E.

A1 - de,Roos F.

A1 - van,Gijn J.

Y1 - 1993/08/28/

N1 - Cremers, M J. Bol, E. de Roos, F. van Gijn, J

Lancet

2985213r, 10s, 0053266

AIM, IM

Clinical Trial. Comparative Study. Journal Article. Randomized Controlled Trial. Research Support, Non-U.S.

Gov't

English

KW - Medline

KW - Adolescent

KW - Adult

KW - Atlanto-Axial Joint/ra [Radiography]

KW - Atlanto-Axial Joint

KW - Child

KW - Preschool

KW - Down Syndrome/co [Complications]

KW - Down Syndrome/pp [Physiopathology]

KW - Female

KW - Humans

KW - Joint Instability/co [Complications]

KW - Male

KW - Motor Skills

KW - Nervous System Diseases/et [Etiology]

KW - Risk Factors

KW - Sports

RP - NOT IN FILE

SP - 511

EP - 514

JF - Lancet

VL - 342

IS - 8870

CY - ENGLAND

N2 - 10-40% of children with Down's syndrome have atlantoaxial instability. These children might run the risk of spinal cord compression if they play sport. The aim of our study was to assess this presumed risk. We obtained 282 radiographs of the cervical spine from a cohort of 400 children and young adults with Down's syndrome who attended special schools and who were between 4 and 20 years old (about 25% of all such children in the Netherlands). The atlantoaxial distance was more than 4 mm in 91 children. These children were randomly assigned to two groups, with the provision that all children at any particular school were assigned to the same group. Children of one group were allowed to continue their habitual sports and exercise activities, whereas those in the other group were advised not to play "risky" sports (as defined by a panel of four experts) and not to make "risky" movements during physical education lessons. The compliance of the experimental group was good. After a year, there were no differences between the groups in scores on a functional motor scale, the frequency of neurological signs, or changes in the atlantoaxial distance. The motor function of a third group of 44 children with Down's syndrome but normal atlantoaxial distances was similar to that of children in the other two groups, as was the frequency of neurological signs. These findings suggest there is no reason to stop children with Down's syndrome from playing certain sports and no need to screen them by radiography before they take up such sports activities

SN - 0140-6736

AD - Janus Jongbloed Research Center, University Department of Physiology and Sports, Utrecht, Netherlands

UR - 8102665

ER -

TY - JOUR

ID - 447

T1 - Pretend play in high-risk and developmentally delayed children. [Review] [46 refs]

A1 - Sigman,M.

A1 - Sena,R.

Y1 - 1993///

N1 - Sigman, M. Sena, R

New directions for child development

n6g, 8104414

IM

Journal Article. Research Support, U.S. Gov't, Non-P.H.S.. Research Support, U.S. Gov't, P.H.S.. Review English

KW - Medline

KW - Child

KW - Preschool

KW - Cognition

KW - Developmental Disabilities

KW - Exploratory Behavior

KW - Humans

KW - Infant

KW - Newborn

KW - Play and Playthings

RP - NOT IN FILE

SP - 29

EP - 42

JF - New Directions for Child Development

JA - New Dir.Child Dev.

IS - 59

CY - UNITED STATES

SN - 0195-2269

AD - University of California, Los Angeles

UR - 7683392

ER -

TY - JOUR

ID - 448

T1 - Family experiences, attitudes, and household safety practices regarding firearms

A1 - Wiley,C.C.

A1 - Casey,R.

Y1 - 1993/02//

N1 - Wiley, C C. Casey, R

Clinical pediatrics

dhe, 0372606, 8407647

AIM, IM

Journal Article

English

KW - Medline

KW - Adult

KW - Child

KW - Preschool

KW - Continental Population Groups

KW - Educational Status

KW - Employment

KW - Family/px [Psychology]

KW - Family

KW - Fear

KW - Female

KW - Firearms/st [Standards]

KW - Firearms/sn [Statistics & Numerical Data]

KW - Health Knowledge

KW - Attitudes

KW - Practice

KW - Hospitals

KW - Pediatric

KW - Humans

KW - Income

KW - Interviews as Topic

KW - Male

KW - Marital Status

KW - Maternal Age

KW - Mothers/ed [Education]

KW - Mothers/px [Psychology]

KW - Ownership

KW - Philadelphia

KW - Play and Playthings

KW - Prospective Studies

KW - Questionnaires

KW - Safety

KW - Sex Factors

KW - Socioeconomic Factors

KW - Television

KW - Urban Population

KW - Violence

RP - NOT IN FILE

SP - 71

EP - 76

JF - Clinical Pediatrics

JA - Clin.Pediatr (Phila)

VL - 32

IS - 2

CY - UNITED STATES

N2 - To assess families' experiences with shootings and firearm ownership and attitudes, 208 children aged 5 to 12 years were interviewed and 242 parents filled out a questionnaire, all at an urban hospital. Forty-three percent of the parents and 25% of the children had personal knowledge of shootings. Of the parents, 10% owned guns, of which only 21% were stored safely. Gun ownership was more common in homes with resident adult males (14%) than in those with no adult males (3%). Most children (81%) played with guns, and 20% to 25% preferred violent TV shows, games, and toys. Parents' and children's attitudes toward firearms and children's gun play did not differ by level of mother's education; method of payment for, or site of, health care; income; or exposure to shootings. Children with personal knowledge of shootings more often expressed fears of being shot than did other children (52% vs 31%). The children in our study population were similar in their gun play and attitudes about gun use despite disparate socioeconomic backgrounds and exposure to shootings

SN - 0009-9228

AD - Division of General Pediatrics, Children's Hospital of Philadelphia, Pennsylvania 19104

UR - 8432082

ER -

TY - JOUR

ID - 449

T1 - Parenting provided by adults with mental retardation. [Review] [86 refs]

A1 - Dowdney,L.

A1 - Skuse,D.

Y1 - 1993/01//

N1 - Dowdney, L. Skuse, D

Journal of child psychology and psychiatry, and allied disciplines

hp3, 0375361

IM

Journal Article. Review

English

KW - Medline

KW - Adult

KW - Child

KW - Child Abuse/ep [Epidemiology]

KW - Female

KW - Humans

KW - Intellectual Disability/ep [Epidemiology]

KW - Intellectual Disability/rh [Rehabilitation]

KW - Intellectual Disability

KW - Male

KW - Middle Aged

KW - Parenting

KW - Risk Factors

RP - NOT IN FILE

SP - 25

EP - 47

JF - Journal of Child Psychology & Psychiatry & Allied Disciplines

JA - J Child Psychol.Psychiatry

VL - 34

IS - 1

## CY - ENGLAND

N2 - Studies assessing the quality of parenting provided by adults with mental retardation present conflicting conclusions. Some consider the majority to be doing reasonably well, whilst others report frequently unsatisfactory caretaking. There are a number of reasons for such different views. First, inconsistent selection criteria make it hard to compare across studies. In particular, sample composition will be influenced by the recruitment source. For example, if parents have been chosen from voluntary educational programmes a rather different picture is likely to be found than if they have been selected from individuals known to, or referred by, statutory agencies. On the whole, authors working with subjects from the former source have been rather more optimistic than those working with parents referred because there were already serious concerns about parenting difficulties or about delayed child development. Secondly, the majority of studies have used poorly defined global measures of parenting, with variable criteria of what constitutes adequate care. Some have concentrated on physical care and hygiene, whilst others have looked for the presence of affection and warmth. A child's reception into care as the sole measure of the quality of parenting is an unsatisfactory criterion because parental retardation has itself occasionally been used as the basis for removal of a child into care, even in the absence of other evidence of neglect or abuse. Thirdly, methodological flaws are found in studies that have used observational assessments of parenting. Such studies have suggested mothers with mental retardation tend to lack interactive skills (such as high levels of praise and imitation, and low restrictiveness) which are known to be associated with optimal child development. Control groups have often not been matched on social and other variables which might be expected to exert a significant influence upon parenting practices. In addition, the generalisability of these observational studies is open to question as parenting style has been adduced from brief play sessions, lasting at the most 10 minutes. The extent to which mothers with mental retardation play spontaneously with their children at home in a stimulating and age-appropriate fashion has not been measured. With regard to the evidence on abuse and neglect, questions have been raised about whether the children of parents with mental retardation are at increased risk. This problem has rarely been addressed in a methodologically satisfactory way. First, most studies have drawn their samples from referrals to medical or psychiatric departments. Secondly, as indicated earlier, reception into care cannot by itself be taken to be an indicator of child abuse.(ABSTRACT TRUNCATED AT 400 WORDS) [References: 86]

SN - 0021-9630

AD - Department of Child Health, Kingston Hospital, Kingston upon Thames, U.K

UR - 8421068

ER -

TY - JOUR

ID - 450

T1 - Child care center's new playground proves that safety isn't child's play

A1 - Minnich,J.S.

Y1 - 1993/01//

N1 - Minnich, J S

Health facilities management

8906517, hfm

H

Journal Article

English

KW - Medline

KW - Child Day Care Centers

KW - Child

KW - Preschool

KW - Facility Design and Construction

KW - Hospital Bed Capacity

KW - 500 and over

KW - Humans

KW - Infant

KW - Play and Playthings

KW - Safety

KW - Virginia

RP - NOT IN FILE

SP - 14

EP - 15

JF - Health Facilities Management

JA - Health Facil.Manage.

VL - 6

IS - 1

CY - UNITED STATES

SN - 0899-6210

UR - 10123278

ER -

TY - JOUR

ID - 451

T1 - Inhibition in toddlerhood and the dynamics of the child's interaction with an unfamiliar peer at age five

A1 - Kochanska,G.

A1 - Radke-Yarrow,M.

Y1 - 1992/04//

N1 - Kochanska, G. Radke-Yarrow, M

Child development

0372725, d28

IM

Journal Article. Research Support, Non-U.S. Gov't. Research Support, U.S. Gov't, P.H.S.

English

KW - Medline

KW - Age Factors

KW - Child Behavior

KW - Child

KW - Preschool

KW - Female

KW - Forecasting

KW - Humans

KW - Inhibition (Psychology)

KW - Interpersonal Relations

KW - Male

KW - Peer Group

RP - NOT IN FILE

SP - 325

EP - 335

JF - Child Development

JA - Child Dev.

VL - 63

IS - 2

CY - UNITED STATES

N2 - Measures of inhibition to social and nonsocial unfamiliar events, obtained in toddlerhood, were studied as predictors of social behaviors during an interaction with an unfamiliar peer in 100 5-year-old children. Social inhibition predicted a highly shy and inhibited behavioral pattern with peer and less frequent expression of affect during fantasy play; nonsocial inhibition predicted decreased involvement in group play. Analysis of the changing dynamics of the ongoing peer interaction revealed that the role of child inhibition as a predictor of social behavior may be mostly evident during the initial encounter with the peer. Children who as toddlers were particularly socially inhibited, during the initial phase of peer interaction showed a significantly stronger pattern of shy and inhibited behavior and proximity to mother. In contrast to existing evidence that maternal depression may be a risk factor for the child's long-term peer relationships, no differences in social behavior were found between children of normal and affectively ill mothers during a brief encounter with unfamiliar peers

SN - 0009-3920

AD - National Institute of Mental Health, Bethesda, MD 20892

UR - 1611937



ER -

TY - JOUR

ID - 452

T1 - The role of after-school programs in the lives of inner-city children: a study of the "urban youth network"

A1 - Halpern,R.

Y1 - 1992/05//

N1 - Halpern, R

Child welfare

0372735, d2u, 0372735

IM

Journal Article

English

KW - Medline

KW - Chicago

KW - Child

KW - Child Day Care Centers/ec [Economics]

KW - Child Day Care Centers/ma [Manpower]

KW - Child Day Care Centers/og [Organization & Administration]

KW - Child Welfare

KW - Community Mental Health Services/ec [Economics]

KW - Community Mental Health Services/ma [Manpower]

KW - Community Mental Health Services/og [Organization & Administration]

KW - Group Processes

KW - Health Services Research

KW - Humans

KW - Play and Playthings

KW - Safety

KW - Student Dropouts

KW - Urban Health

KW - Violence

RP - NOT IN FILE

SP - 215

EP - 230

JF - Child Welfare

VL - 71

IS - 3

CY - UNITED STATES

N2 - A study of a network of agency centers located in eight of Chicago's most deprived neighborhoods reveals a great deal about inner-city children and the difficulties of reaching them and holding their attendance. It also points up sharply the funding and staffing necessary to enable the centers to realize their potential for services to these children

SN - 0009-4021

AD - Erikson Institute, Chicago, IL

UR - 1606847

ER -

TY - JOUR

ID - 453

T1 - Self-reported safety practices in child care facilities

A1 - O'Connor,M.A.

A1 - Boyle,W.E.,Jr.

A1 - O' Connor,G.T.

A1 - Letellier,R.

Y1 - 1992/01//

N1 - O'Connor, M A. Boyle, W E Jr. O' Connor, G T. Letellier, R  
American journal of preventive medicine  
8704773, apl

IM

Journal Article. Research Support, U.S. Gov't, P.H.S.

English

KW - Medline

KW - Accidental Falls/pc [Prevention & Control]

KW - Age Factors

KW - Child

KW - Child Day Care Centers/st [Standards]

KW - Preschool

KW - Humans

KW - Interviews as Topic

KW - Licensure/lj [Legislation & Jurisprudence]

KW - New Hampshire

KW - Play and Playthings

KW - Safety

KW - Wounds and Injuries/mo [Mortality]

KW - Wounds and Injuries/pc [Prevention & Control]

RP - NOT IN FILE

SP - 14

EP - 18

JA - American Journal of Preventive Medicine

VL - 8

IS - 1

CY - UNITED STATES

N2 - To determine the prevalence of safety hazards and current injury prevention practices in child care settings, we administered a structured telephone interview to a geographically stratified, randomly selected sample of licensed child care facilities. Representatives of 130 child care facilities responded to questions about current injury prevention practices. Specific hazards assessed were related to burns, falls, poisoning, playgrounds, and emergency telephone numbers. Results indicated that 26.8% of providers who knew the temperature of their tap water stated that it was over 130 degrees F.; 14.1% had space heaters accessible to children; 30.3% of those with stairs accessible to children lacked safety gates; 61.4% of those with playgrounds did not have an impact-absorbing surface under playground equipment; 16.9% of respondents had an unexpired bottle of syrup of ipecac; 55.8% demonstrated that a poison control center telephone number was available to them; and 80% of providers could demonstrate the availability of the telephone number of the local ambulance. We conclude that potential and remedial injury hazards exist in some licensed child care centers and that providers of child care within licensed facilities are a promising target for childhood injury prevention interventions

SN - 0749-3797

AD - Department of Maternal and Child Health, Injury Prevention Resource and Research Center, Dartmouth Medical School, Hanover, NH 03756

UR - 1575995

ER -

TY - JOUR

ID - 454

T1 - AAOS launches campaign to prevent injury

A1 - Hensinger,R.

Y1 - 1992/02//

N1 - Hensinger, R

Minnesota medicine

nby, 8000173

IM

Letter

English

KW - Medline

KW - Adolescent

KW - Child

KW - Health Education

KW - Humans

KW - Play and Playthings

KW - Safety

KW - Wounds and Injuries/pc [Prevention & Control]

RP - NOT IN FILE

SP - 8

EP - 9

JF - Minnesota Medicine

JA - Minn.Med

VL - 75

IS - 2

CY - UNITED STATES

SN - 0026-556X

UR - 1565079

ER -

TY - JOUR

ID - 455

T1 - Evaluation of an intervention to reduce playground hazards in Atlanta child-care centers

A1 - Sacks,J.J.

A1 - Brantley,M.D.

A1 - Holmgreen,P.

A1 - Rochat,R.W.

Y1 - 1992/03//

N1 - Sacks, J J. Brantley, M D. Holmgreen, P. Rochat, R W

American journal of public health

1254074, 3xw

AIM, IM

Journal Article

English

KW - Medline

KW - Accident Prevention

KW - Administrative Personnel/ed [Education]

KW - Child Day Care Centers/og [Organization & Administration]

KW - Child Day Care Centers/st [Standards]

KW - Child Day Care Centers/sn [Statistics & Numerical Data]

KW - Child

KW - Preschool

KW - Evaluation Studies as Topic

KW - Georgia

KW - Humans

KW - Play and Playthings

KW - Safety

RP - NOT IN FILE

SP - 429

EP - 431

JF - American Journal of Public Health

JA - Am J Public Health

VL - 82

IS - 3

CY - UNITED STATES

N2 - In 1988, we identified playground hazards at 58 child-care centers (CCCs) and intervened by showing the director the hazards and distributing safety information. In 1990, we evaluated the 58 intervention CCCs as well as 71 randomly selected control CCCs. Intervention centers had 9.4 hazards per playground; control centers had 8.0. We conclude that the intervention was ineffective

SN - 0090-0036

AD - Division of Injury Control, Centers for Disease Control, Atlanta, GA 30333

UR - 1536361

ER -

TY - JOUR

ID - 456

T1 - Heterogeneities in water contact patterns and the epidemiology of *Schistosoma haematobium*

A1 - Chandiwana, S.K.

A1 - Woolhouse, M.E.

Y1 - 1991/12//

N1 - Chandiwana, S K. Woolhouse, M E

Parasitology

or0, 0401121

IM

Journal Article. Research Support, Non-U.S. Gov't

English

KW - Medline

KW - Adolescent

KW - Adult

KW - Age Factors

KW - Animals

KW - Baths

KW - Child

KW - Preschool

KW - Disease Vectors

KW - Female

KW - Humans

KW - Laundering

KW - Male

KW - Play and Playthings

KW - *Schistosoma haematobium*/ip [Isolation & Purification]

KW - Schistosomiasis haematobia/ep [Epidemiology]

KW - Schistosomiasis haematobia/tm [Transmission]

KW - Sex Factors

KW - Snails/ps [Parasitology]

KW - Swimming

KW - Water

KW - Zimbabwe/ep [Epidemiology]

RP - NOT IN FILE

SP - 363

EP - 370

JF - Parasitology

VL - 103 Pt 3

CY - ENGLAND

N2 - Variations in the amount of water contact made by individuals and in the amount of water contact made at different sites may have significant impacts on patterns of human schistosome infection. Previous studies have reported variations in the rate of water contact and differences in the sites used between age/sex classes, but there is limited information on variations in individual water contact behaviour. In this paper we report and analyse observations of essentially all water contacts made over a two week period by all individuals in a rural community in eastern Zimbabwe. The mean rate of water contact was 0.43 contacts/person/day. These data were

over-dispersed, ranging from zero to 3.3 contacts/person/day; 90% of contacts were made by only 37% of the population. Contact rates were related to age (highest in 8 to 10-year-olds) but not sex, with substantial variation unaccounted for by these variables. Age and sex classes differed in types of water-related activities and the time of day of contact. A greater diversity of sites was used by children than by adults and by males than by females. Individual contact rates were correlated with intensities of infection, although the risk of infection per contact was estimated to be highest in 2 to 4-year-old children and higher for males than females. Five contact sites were used during the study period, with more than 50% of contacts occurring at just 2 sites. Different age and sex classes used different sites and there were additional site-related differences in types of activity and the time of day of use. The implications of these water contact patterns for schistosome epidemiology are discussed. In particular the results provide strong quantitative support for control programmes aimed at heavily used sites (e.g. focal mollusciciding) or at the minority of individuals making most water contacts (e.g. targeted chemotherapy)

SN - 0031-1820

AD - Blair Research Laboratory, Harare, Zimbabwe

UR - 1780173

ER -

TY - JOUR

ID - 457

T1 - The Play Activity Questionnaire: a parent report measure of children's play preferences

A1 - Finegan,J.A.

A1 - Niccols,G.A.

A1 - Zacher,J.E.

A1 - Hood,J.E.

Y1 - 1991/08//

N1 - Finegan, J A. Niccols, G A. Zacher, J E. Hood, J E

Archives of sexual behavior

8gr, 1273516

IM

Journal Article. Research Support, Non-U.S. Gov't

English

KW - Medline

KW - Child

KW - Child Psychology

KW - Preschool

KW - Choice Behavior

KW - Evaluation Studies as Topic

KW - Factor Analysis

KW - Statistical

KW - Female

KW - Gender Identity

KW - Humans

KW - Male

KW - Parents/px [Psychology]

KW - Play and Playthings

KW - Questionnaires/st [Standards]

KW - Reproducibility of Results

KW - Sex Factors

RP - NOT IN FILE

SP - 393

EP - 408

JF - Archives of Sexual Behavior

JA - Arch.Sex Behav

VL - 20

IS - 4

CY - UNITED STATES

N2 - Three studies describe the development and validation of the Play Activity Questionnaire (PQ), a parent report measure of children's play preferences. In Study 1, the 15-item PQ was completed by parents of 239 6- to 8-year-old children, and exploratory factor analysis revealed four play factors: Active and Adventurous, Athletic, Rough-and-Tumble, and Quiet. In Study 2, the factor structure was replicated with PQ data on 203 children of a broader age range (4 to 12 years). The play factors accounted for 65.7% of the variance. Boys' scores exceeded girls' scores on the Athletic and Rough-and-Tumble play factors. Girls' scores exceeded boys' scores on the Quiet play factor. Sex differences were not observed on the Active and Adventurous play factor. Interparent agreement was moderately high, and PQ factor scores were unrelated to social class or nationality. Individual factor scores showed moderate to high stability over 5 months. Validity of the play factors was examined in Study 3 by relating factor scores to measures of activity level, aggression, and sex-typed play. Play factor scores were associated with several of these measures, suggesting that the PQ is a valid measure of children's play behavior with potential applications in the fields of developmental psychopathology and psychoneuroendocrinology, and in studies of normal play and sex-role development

SN - 0004-0002

AD - Department of Psychology, Hospital for Sick Children, Toronto, Canada

UR - 1953330

ER -

TY - JOUR

ID - 458

T1 - 'To be the best or not to be, that is the question ...' On enactment, play and acting out

A1 - Van,Waning A.

Y1 - 1991///

N1 - Van Waning, A

The International journal of psycho-analysis

gsl, 2985179r

IM

Case Reports. Journal Article

English

KW - Medline

KW - Acting Out

KW - Child

KW - Fantasy

KW - Humans

KW - Male

KW - Play Therapy/mt [Methods]

KW - Psychoanalytic Interpretation

KW - Psychoanalytic Theory

KW - Psychoanalytic Therapy/mt [Methods]

KW - Risk-Taking

KW - Symbolism

KW - Transference (Psychology)

RP - NOT IN FILE

SP - 539

EP - 551

JF - International Journal of Psycho-Analysis

JA - Int.J Psychoanal.

VL - 72

IS - Pt 3

CY - ENGLAND

SN - 0020-7578

UR - 1718915

ER -

TY - JOUR

ID - 459

T1 - Sexualized doll play  
A1 - Sonnenschein,K.  
A1 - Licamele,W.  
Y1 - 1991/07//  
N1 - Sonnenschein, K. Licamele, W  
Journal of the American Academy of Child and Adolescent Psychiatry  
hg5, 8704565  
IM  
Comment. Letter  
English  
KW - Medline  
KW - Child  
KW - Child Abuse  
KW - Sexual/di [Diagnosis]  
KW - Sexual/lj [Legislation & Jurisprudence]  
KW - Sexual/px [Psychology]  
KW - Preschool  
KW - Humans  
KW - Play and Playthings  
KW - Psychosexual Development  
KW - Risk Factors  
RP - NOT IN FILE  
SP - 694  
EP - 695  
JF - Journal of the American Academy of Child & Adolescent Psychiatry  
JA - J Am Acad.Child Adolesc Psychiatry  
VL - 30  
IS - 4  
CY - UNITED STATES  
SN - 0890-8567  
UR - 1890108  
ER -  
  
TY - JOUR  
ID - 460  
T1 - Focus on summertime  
A1 - Rollins,J.A.  
Y1 - 1991/05//  
N1 - Rollins, J A  
Pediatric nursing  
oun, 7505804  
N  
Journal Article  
English  
KW - Medline  
KW - Child  
KW - Preschool  
KW - Drowning/pc [Prevention & Control]  
KW - Humans  
KW - Patient Advocacy  
KW - Play and Playthings  
KW - Safety  
KW - Seat Belts  
RP - NOT IN FILE  
SP - 317  
EP - 319

JF - Pediatric Nursing

JA - Pediatr Nurs

VL - 17

IS - 3

CY - UNITED STATES

SN - 0097-9805

UR - 2062597

ER -

TY - JOUR

ID - 461

T1 - Sociometric status: its stability and validity among neglected, rejected and popular children

A1 - Ollendick, T.H.

A1 - Greene, R.W.

A1 - Francis, G.

A1 - Baum, C.G.

Y1 - 1991/03//

N1 - Ollendick, T H. Greene, R W. Francis, G. Baum, C G

Journal of child psychology and psychiatry, and allied disciplines

hp3, 0375361

IM

Journal Article

English

KW - Medline

KW - Aggression/px [Psychology]

KW - Child

KW - Female

KW - Humans

KW - Internal-External Control

KW - Male

KW - Peer Group

KW - Personality Development

KW - Play and Playthings

KW - Rejection (Psychology)

KW - Social Behavior

KW - Social Desirability

KW - Social Isolation/px [Psychology]

KW - Sociometric Techniques

RP - NOT IN FILE

SP - 525

EP - 534

JF - Journal of Child Psychology & Psychiatry & Allied Disciplines

JA - J Child Psychol.Psychiatry

VL - 32

IS - 3

CY - ENGLAND

N2 - Although important distinctions among sociometrically rejected, neglected, and popular children have been reported in the literature, concerns have been raised about use of negative peer nominations in identifying these children. A revised procedure developed by Asher and Dodge [Developmental Psychology, 22, 444-449 (1986)] eliminates the need to obtain negative peer nominations. In the present study, the construct validity of this revised procedure was explored and its long-term stability examined over 6, 12 and 18 months. Our findings establish significant differences on several indices among rejected, neglected and popular children. However, the differences between rejected and popular children were more robust than those between neglected and popular children, who failed to differ from one another on most of the measures. Moreover, fairly good long-term stability was found for popular and rejected status, whereas the long-term stability for neglected status was



quite poor. These findings were addressed in the context of similar research employing negative nomination methods. Implications for the identification of at-risk children were also discussed

SN - 0021-9630

AD - Department of Psychology, Virginia Polytechnic Institute and State University, Blacksburg 24061-0436

UR - 2061371

ER -

TY - JOUR

ID - 462

T1 - Video analysis of playground injury-risk situations

A1 - Coppens,N.M.

A1 - Gentry,L.K.

Y1 - 1991/04//

N1 - Coppens, N M. Gentry, L K

Research in nursing & health

7806136, raq

IM, N

Journal Article. Research Support, Non-U.S. Gov't

English

KW - Medline

KW - Aggression

KW - Child

KW - Female

KW - Humans

KW - Male

KW - New England/ep [Epidemiology]

KW - Play and Playthings

KW - Risk Factors

KW - Schools

KW - Sex Factors

KW - Videotape Recording

KW - Wounds and Injuries/ep [Epidemiology]

KW - Wounds and Injuries/px [Psychology]

RP - NOT IN FILE

SP - 129

EP - 136

JF - Research in Nursing & Health

JA - Res.Nurs Health

VL - 14

IS - 2

CY - UNITED STATES

N2 - An observational study was conducted to examine injury-risk situations as they occurred during playground recess periods. A process analysis approach was used to describe antecedent conditions, response, consequence, and reaction depicted in the video scenes. Results indicate that boys were more involved than girls, playground equipment was frequently used improperly, aggressive behaviors were sometimes a factor, situations occurred more frequently with nonteacher than teacher monitors, and children infrequently took action to stop the situations. Other children were more likely to react to the target child than the monitor. Direction is provided for child and monitor safety promotion programs

SN - 0160-6891

AD - Nursing Department, College of Health Professions, University of Lowell, Massachusetts 01854

UR - 2047534

ER -

TY - JOUR

ID - 463

T1 - [Health and hygiene research on constructive toys intended for children over 7 under natural conditions].  
[Bulgarian]

A1 - Uzunova,S.

A1 - Mineva,T.

Y1 - 1990///

N1 - Uzunova, S. Mineva, T

Problemi na khigienata

ppc, 7703299

IM

English Abstract. Journal Article

Bulgarian

KW - Medline

KW - Child

KW - Child Development

KW - Evaluation Studies as Topic

KW - Humans

KW - Hygiene

KW - Play and Playthings

KW - Questionnaires

KW - Safety

RP - NOT IN FILE

SP - 38

EP - 47

JF - Problemi na Khigienata

JA - Probl.Khig.

VL - 15

CY - BULGARIA

N2 - Physiological and questionnaire investigations are carried out on 10 constructive toys, with the participation of 38 children 7 to 12 years old. A testimonial of the toys is made according to mass, dimensions, technological treatment, packing etc. A number of discrepancies with the hygienic requirements were established: 1) imperfection of the technological treatment (sharp edges, tops and holes, difficult assembling and disassembling of details, not fitting some details at construction, presence of odour, dust in the packings); 2) discrepancy with the announced age destination; 3) faults (incongruity of colours, small dimensions of models and not clear and contrast models, absence of age destination); 4) unphysiological strain and fatigue during play with part of the toys. On the basis of the results are developed hygiene recommendations to the manufacturing of constructive toys for children over 7 years

SN - 0323-9179

UR - 2099461

ER -

TY - JOUR

ID - 464

T1 - Children with congenital anomalies: the preschool period

A1 - Allen,R.

A1 - Wasserman,G.A.

A1 - Seidman,S.

Y1 - 1990/06//

N1 - Allen, R. Wasserman, G A. Seidman, S

Journal of pediatric psychology

j18, 7801773

IM

Journal Article. Research Support, Non-U.S. Gov't. Research Support, U.S. Gov't, P.H.S.

English

KW - Medline

KW - Child

KW - Preschool

KW - Congenital Abnormalities/px [Psychology]

KW - Cooperative Behavior

KW - Disabled Persons/px [Psychology]

KW - Female

KW - Humans

KW - Male

KW - Mother-Child Relations

KW - Personality Development

KW - Play and Playthings

RP - NOT IN FILE

SP - 327

EP - 345

JF - Journal of Pediatric Psychology

JA - J Pediatr Psychol.

VL - 15

IS - 3

CY - UNITED STATES

N2 - To address a gap regarding the development of preschool children with physical congenital anomalies and the adaptational responses of their caretakers, 37 children with anomalies and 44 control children were assessed. Children were administered the Stanford-Binet and the Preschool Language Scale, and the children and their mothers were observed in a series of semi-structured situations. Performance on linguistic and intellectual tests was related to socioeconomic status, not to medical risk. Children with anomalies were more socially reticent and compliant than peers, and their mothers were more controlling and nonverbally active during a teaching task. Results are discussed in terms of Bell's lower-limit adaptational pattern

SN - 0146-8693

AD - Department of Psychology, Long Island University, Brooklyn, New York 11201

UR - 2143228

ER -

TY - JOUR

ID - 465

T1 - Influences of TV games on physical and psychological development of Japanese kindergarten children

A1 - Shimai,S.

A1 - Masuda,K.

A1 - Kishimoto,Y.

Y1 - 1990/06//

N1 - Shimai, S. Masuda, K. Kishimoto, Y

Perceptual and motor skills

ozb, 0401131

IM

Comparative Study. Journal Article

English

KW - Medline

KW - Child Behavior Disorders/px [Psychology]

KW - Child Development

KW - Child

KW - Preschool

KW - Cross-Cultural Comparison

KW - Female

KW - Humans

KW - Japan

KW - Male

KW - Personality Development

KW - Play and Playthings

KW - Risk Factors

KW - Sex Factors

KW - Television

RP - NOT IN FILE

SP - 771

EP - 776

JA - Perceptual & Motor Skills

VL - 70

IS - 3 Pt 1

CY - UNITED STATES

N2 - The present study was an investigation of playing a TV game and its influences on physical and psychological development of kindergarten children. A self-completed questionnaire was delivered to the parents of 426 children. Of these, 408 had fully completed answers. Questions regarded the amounts of TV game play, its influences on health and on development of children and the attitudes of parents toward the game. Analysis indicated that the kindergarten children, especially boys, played frequently and both the percentage of players and the number of playing hours increased with age. Few adverse effects were reported on vision or other aspects of physical health. Children who played the game had much higher scores on sociability than those with no experience. This seemed to reflect that children acquired a new repertoire of plays from the TV game

SN - 0031-5125

AD - Department of Hygiene and Preventive Medicine, Fukushima Medical College, Japan

UR - 2377408

ER -

TY - JOUR

ID - 466

T1 - Effects of obesity, social interactions, and physical environment on physical activity in preschoolers

A1 - Klesges,R.C.

A1 - Eck,L.H.

A1 - Hanson,C.L.

A1 - Haddock,C.K.

A1 - Klesges,L.M.

Y1 - 1990///

N1 - Klesges, R C. Eck, L H. Hanson, C L. Haddock, C K. Klesges, L M

Health psychology : official journal of the Division of Health Psychology, American Psychological Association  
ejl, 8211523

IM

Journal Article. Research Support, Non-U.S. Gov't. Research Support, U.S. Gov't, P.H.S.

English

KW - Medline

KW - Child

KW - Preschool

KW - Female

KW - Humans

KW - Male

KW - Motor Activity

KW - Obesity/ge [Genetics]

KW - Obesity/px [Psychology]

KW - Parent-Child Relations

KW - Play and Playthings

KW - Risk Factors

KW - Sex Factors

KW - Social Environment

RP - NOT IN FILE

SP - 435

EP - 449

JF - Health Psychology

JA - Health Psychol.

VL - 9

IS - 4

CY - UNITED STATES

N2 - Examined demographic, environmental, and parent-child interactional correlates of physical activity in a group of 222 preschoolers. Activity levels were assessed with a system that quantified directly observed physical activity in the natural environment. Using regression-modeling procedures, results revealed a significant relationship between (a) child's relative weight, parental weight status, and percentage of time spent outdoors (environment) and (b) children's activity levels. Parental obesity was associated with lower levels of physical activity in children, childhood relative weight was associated with slightly higher levels of physical activity, and more outdoor activity was associated with higher activity levels. Parental participation in children's activities also significantly interacted with levels of parental obesity in predicting activity levels. Those children with a 50% risk for obesity (as defined by both, one, or neither parent being overweight) had small changes in activity across levels of parent-child interaction, whereas those at higher risk for obesity responded with increased activity as parent-child interactions increased. Results are discussed, and the implications of these findings for future intervention efforts are examined

SN - 0278-6133

AD - Department of Psychology, Memphis State University, TN 38152

UR - 2373068

ER -

TY - JOUR

ID - 467

T1 - Safe care/safe play: child care as a site for injury prevention

A1 - Finn-Stevenson,M.

A1 - Stevenson,J.J.

Y1 - 1990///

N1 - Finn-Stevenson, M. Stevenson, J J

Children today

d2e, 0320227, 0320227

IM

Journal Article

English

KW - Medline

KW - Accident Prevention

KW - Child

KW - Child Care/mt [Methods]

KW - Preschool

KW - Connecticut

KW - Humans

KW - Play and Playthings

KW - Risk Factors

KW - Safety

KW - Wounds and Injuries/ep [Epidemiology]

KW - Wounds and Injuries/pc [Prevention & Control]

RP - NOT IN FILE

SP - 16

EP - 20, 32

JF - Children Today

JA - Child Today

VL - 19

IS - 2

CY - UNITED STATES

SN - 0361-4336

AD - Bush Center in Child Development and Social Policy, Yale University

UR - 2347253

ER -

TY - JOUR  
ID - 468  
T1 - Playroom injury leads to hospital liability  
Y1 - 1990/01//  
N1 - Hospital law newsletter  
hln, 8911901  
H  
Journal Article  
English  
KW - Medline  
KW - Child Care/lj [Legislation & Jurisprudence]  
KW - Child  
KW - Preschool  
KW - Humans  
KW - Louisiana  
KW - Malpractice/lj [Legislation & Jurisprudence]  
KW - Outpatient Clinics  
KW - Hospital/lj [Legislation & Jurisprudence]  
KW - Play and Playthings  
KW - Safety  
RP - NOT IN FILE  
SP - 3  
EP - 5  
JF - Hospital Law Newsletter  
JA - Hosp.Law Newsl.  
VL - 7  
IS - 3  
CY - UNITED STATES  
SN - 0738-0984  
UR - 10104397  
ER -

TY - JOUR  
ID - 469  
T1 - Roulette of the road: a new kind of suicide attempt? A preliminary report  
A1 - Hes,J.P.  
Y1 - 1989/10//  
N1 - Hes, J P  
Crisis  
dt9, 8218602  
IM  
Journal Article  
English  
KW - Medline  
KW - Accidents  
KW - Traffic/px [Psychology]  
KW - Adolescent  
KW - Child  
KW - Gambling  
KW - Humans  
KW - Israel  
KW - Play and Playthings  
KW - Risk-Taking  
KW - Suicide  
KW - Attempted/px [Psychology]  
RP - NOT IN FILE

SP - 179

EP - 180

JF - Crisis: Journal of Crisis Intervention & Suicide

JA - Crisis

VL - 10

IS - 2

CY - CANADA

N2 - The author reports on children aged 7-14 who throw an object onto the highway shortly before a car comes and run to fetch it in front of the approaching automobile. He discusses the problems linked with that roulette-style play with death

SN - 0227-5910

UR - 2591251

ER -

TY - JOUR

ID - 470

T1 - Attention deficit disorder and allergy: a neurochemical model of the relation between the illnesses.

[Review] [110 refs]

A1 - Marshall,P.

Y1 - 1989/11//

N1 - Marshall, P

Psychological bulletin

0376473, qe8

IM

Journal Article. Review

English

KW - Medline

KW - Arousal/ph [Physiology]

KW - Attention Deficit Disorder with Hyperactivity/pp [Physiopathology]

KW - Brain/pp [Physiopathology]

KW - Child

KW - Humans

KW - Hypersensitivity/pp [Physiopathology]

KW - Receptors

KW - Adrenergic/ph [Physiology]

KW - Cholinergic/ph [Physiology]

KW - Risk Factors

RP - NOT IN FILE

SP - 434

EP - 446

JF - Psychological Bulletin

JA - Psychol.Bull.

VL - 106

IS - 3

CY - UNITED STATES

N2 - Empirical studies suggest that allergies play an etiological role in a small subgroup of children who suffer from attention deficit-hyperactivity disorder (ADHD). Research indicates that allergic reactions results in cholinergic hyperresponsiveness and beta-adrenergic hyporesponsiveness in the autonomic nervous system. Evidence is reviewed that similar imbalances in central nervous system cholinergic/adrenergic activity play a causal role in manic and depressive behaviors. It is hypothesized that allergic reactions engender cholinergic/adrenergic activity imbalances in the central nervous system, leading to poorly regulated arousal levels and ADHD behaviors in some children. [References: 110]

SN - 0033-2909

UR - 2682719

ER -

TY - JOUR

ID - 471

T1 - Sociability and social withdrawal in childhood: stability and outcomes

A1 - Rubin,K.H.

A1 - Hymel,S.

A1 - Mills,R.S.

Y1 - 1989/06//

N1 - Rubin, K H. Hymel, S. Mills, R S

Journal of personality

jmv, 2985194r

IM

Journal Article. Research Support, Non-U.S. Gov't

English

KW - Medline

KW - Child Behavior Disorders/px [Psychology]

KW - Child

KW - Preschool

KW - Depression/px [Psychology]

KW - Female

KW - Humans

KW - Interpersonal Relations

KW - Loneliness

KW - Longitudinal Studies

KW - Male

KW - Peer Group

KW - Personality Development

KW - Play and Playthings

KW - Self Concept

KW - Shyness

KW - Social Isolation

KW - Teaching

RP - NOT IN FILE

SP - 237

EP - 255

JF - Journal of Personality

JA - J Pers.

VL - 57

IS - 2

CY - UNITED STATES

N2 - The stability and long-term correlates of both social withdrawal and sociability were investigated in a longitudinal study of normal children in kindergarten through the fifth grade. Both observational and peer assessment indices of withdrawal and sociability were considered; furthermore, a distinction was made between observed active versus passive solitude. Of particular interest was whether social withdrawal in early childhood was predictive of subsequent internalizing problems, as assessed by self-reports of social competence, overall self-worth, loneliness, and depression as well as teacher ratings of shy/anxious behavior, in later childhood. Results indicated a modest degree of stability for observed social withdrawal but not for observed sociability, nor for active or passive forms of solitude. Somewhat higher stability correlations were obtained for peer assessments of both sociability and withdrawal. In terms of predictive outcomes, significant relations were found between early social withdrawal in kindergarten and Grade 2 and subsequent internalizing problems in Grades 4 and 5, although the pattern of results was mixed. These data suggest that social withdrawal in early childhood may be predictive of risk for internalizing difficulties in later childhood

SN - 0022-3506

AD - Department of Psychology, University of Waterloo, Ontario, Canada

UR - 2769556

ER -



TY - JOUR

ID - 472

T1 - Intelligence and behavior problems in 5-year-olds in relation to representational abilities in the second year of life

A1 - McDonald,M.A.

A1 - Sigman,M.

A1 - Ungerer,J.A.

Y1 - 1989/04//

N1 - McDonald, M A. Sigman, M. Ungerer, J A

Journal of developmental and behavioral pediatrics : JDBP

htf, 8006933

IM

Journal Article. Research Support, Non-U.S. Gov't. Research Support, U.S. Gov't, P.H.S.

English

KW - Medline

KW - Child Behavior Disorders/di [Diagnosis]

KW - Child Language

KW - Child

KW - Preschool

KW - Cognition

KW - Humans

KW - Infant

KW - Newborn

KW - Premature

KW - Intelligence

KW - Language Development

KW - Male

KW - Play and Playthings

KW - Predictive Value of Tests

KW - Psychomotor Performance

KW - Risk Factors

KW - Time Factors

RP - NOT IN FILE

SP - 86

EP - 91

JF - Journal of Developmental & Behavioral Pediatrics

JA - J Dev.Behav Pediatr

VL - 10

IS - 2

CY - UNITED STATES

N2 - Assessments of sensorimotor skill, play, language, and developmental level were administered to 20 preterm and 20 full-term infants during sessions at 13 1/2 and 22 months of age. At 5-year follow-up, children were tested with the Wechsler Preschool and Primary Scale of Intelligence (WIPPSI) and the Developmental Test of Visual-Motor Integration (VMI). Behavior problems were also assessed. At 5 years, the preterm sample showed slight delays in cognitive functioning. Measures of development and language at 13 1/2 and 22 months and relational play at 22 months were most predictive of cognitive outcome. Children with behavior problems at 5 years differed from those without problems in terms of their play and language skills. These data suggest that measures of development, particularly language development, and of play are predictive of later cognitive and behavioral functioning

SN - 0196-206X

AD - Department of Psychiatry, UCLA School of Medicine 90024

UR - 2708542

ER -

TY - JOUR

ID - 473

T1 - Toy weapons and firecrackers: a source of hearing loss

A1 - Gupta,D.

A1 - Vishwakarma,S.K.

Y1 - 1989/03//

N1 - Gupta, D. Vishwakarma, S K

The Laryngoscope

8607378, 11w

IM

Journal Article

English

KW - Medline

KW - Adolescent

KW - Adult

KW - Auditory Threshold

KW - Child

KW - Preschool

KW - Firearms

KW - Hearing Loss

KW - Noise-Induced/et [Etiology]

KW - Humans

KW - Play and Playthings

KW - Risk Factors

KW - Sound Spectrography

RP - NOT IN FILE

SP - 330

EP - 334

JF - Laryngoscope

VL - 99

IS - 3

CY - UNITED STATES

N2 - Although acoustic injury as a result of exposure to noisy toys and firecrackers has been reported previously, most of these studies have been conducted on adults. The purpose of this prospective study, conducted at the time of Deepawali, an Indian festival of fireworks, was two-fold: 1. to measure the acoustic output of representative samples of toy weapons and firecrackers and the intensity level at critical spectator points from the site of emission; and 2. to determine the auditory status of a cross section of the target population, involving 600 participants from various age groups, before and after exposure to firecracker noise at Deepawali. The average sound level at a distance of 3 m was 150 dB, thus exceeding the damage risk criterion for adults (i.e., 130 dB peak level). An average 30 dB persistent sensorineural hearing loss was found in 2.5% of the target population as a result of toy weapon/firecracker noise during Deepawali. The 9- to 15-year-old age group was most affected. A judicious approach in the manufacture and use of toy weapons and firecrackers, in addition to legal restraints, is advocated

SN - 0023-852X

AD - Department of ENT, J.N. Medical College, Aligarh Muslim University, India

UR - 2918804

ER -

TY - JOUR

ID - 474

T1 - Epidemiology of severe eye injuries in childhood

A1 - LaRoche,G.R.

A1 - McIntyre,L.

A1 - Schertzer,R.M.

Y1 - 1988/12//

N1 - LaRoche, G R. McIntyre, L. Schertzer, R M

Ophthalmology

oi5, 7802443

IM

Journal Article. Research Support, Non-U.S. Gov't

English

KW - Medline

KW - Blindness/ep [Epidemiology]

KW - Blindness/et [Etiology]

KW - Child

KW - Preschool

KW - Cross-Sectional Studies

KW - Eye Injuries/ep [Epidemiology]

KW - Eye Injuries/et [Etiology]

KW - Female

KW - Humans

KW - Male

KW - Nova Scotia

KW - Play and Playthings

KW - Risk Factors

KW - Visual Acuity

RP - NOT IN FILE

SP - 1603

EP - 1607

JF - Ophthalmology

VL - 95

IS - 12

CY - UNITED STATES

N2 - The authors conducted a cross-sectional study of all ocular injury cases admitted to a children's hospital between January 1978 and December 1984. Of 222 injuries reviewed, 77 (35%) resulted in some visual deficit. Males were significantly overrepresented in all age groups with an average male:female ratio of 3.5:1. The distribution of injuries was: contusions, 114 (51%); penetrating lacerations, 62 (28%); foreign bodies and burns, 11 (5%); and nonpenetrating lacerations, 35 (16%). Sixteen (7%) ocular injuries were associated with BB gun pellets and six of these children (42%) were blinded in the injured eye as a result. Two other cases of blindness resulted from ocular penetration by homemade "Jinsang Stars," underscoring the adverse influence of media on children's games. Adult supervision could have potentially prevented most cases of permanent visual deficit. The authors suggest that legislation restricting the use of BB guns be passed and that a program of adult and child eye safety education including "eye watch" warnings on potentially hazardous toys be developed

SN - 0161-6420

AD - Department of Ophthalmology, Izaak Walton Killam Hospital for Children, Dalhousie University, Halifax, NS, Canada

UR - 3265999

ER -

TY - JOUR

ID - 475

T1 - Planning playgrounds for children with disabilities. [Review] [33 refs]

A1 - Stout, J.

Y1 - 1988/10//

N1 - Stout, J

The American journal of occupational therapy : official publication of the American Occupational Therapy Association

7705978, 304

IM

Journal Article. Review

English

KW - Medline

KW - Child

KW - Disabled Persons

KW - Environment Design

KW - Equipment Design

KW - Humans

KW - Occupational Therapy

KW - Play and Playthings

KW - Safety

RP - NOT IN FILE

SP - 653

EP - 657

JA - American Journal of Occupational Therapy

VL - 42

IS - 10

CY - UNITED STATES

N2 - Occupational therapists are well qualified for involvement in playground planning. They know how to eliminate architectural barriers, adapt equipment to maximize independence and functional levels, and use play in facilitating children's development. By participating in playground planning or adaptation, the occupational therapist can present play opportunities for children with disabilities, increase public awareness of occupational therapy, and extend the use of treatment modalities. This paper makes specific suggestions for planning and building to make the idea for a playground a realistic goal. A case example illustrates the planning of a playground in a hospital setting. [References: 33]

SN - 0272-9490

AD - Indiana University, Indianapolis 46223

UR - 2974238

ER -

TY - JOUR

ID - 476

T1 - Toddlers' concentration: does maternal depression make a difference?

A1 - Breznitz,Z.

A1 - Friedman,S.L.

Y1 - 1988/05//

N1 - Breznitz, Z. Friedman, S L

Journal of child psychology and psychiatry, and allied disciplines

hp3, 0375361

IM

Journal Article. Research Support, Non-U.S. Gov't. Research Support, U.S. Gov't, P.H.S.

English

KW - Medline

KW - Adult

KW - Arousal

KW - Attention

KW - Child

KW - Preschool

KW - Depressive Disorder/ge [Genetics]

KW - Depressive Disorder/px [Psychology]

KW - Female

KW - Humans

KW - Infant

KW - Male

KW - Mother-Child Relations

KW - Play and Playthings

KW - Risk Factors

RP - NOT IN FILE

SP - 267

EP - 279

JF - Journal of Child Psychology & Psychiatry & Allied Disciplines

JA - J Child Psychol.Psychiatry

VL - 29

IS - 3

CY - ENGLAND

N2 - Twenty-five mother-toddler dyads with depressed mothers were compared with 25 dyads with well mothers on measures of attention during 20 min of spontaneous play in a home-like setting. Children of depressed women focused attention on more objects for shorter durations. Group differences could be accounted for by mothers' involvement in their children's play. Depressed women initiated and terminated more instances of attention to objects than well mothers. Correlations between maternal behaviors and children's attention were statistically significant. Results support the hypothesis that poorer attention of children of depressed women is at least in part mediated by inculcation

SN - 0021-9630

AD - Department of Education, Haifa University, Israel

UR - 3417803

ER -

TY - JOUR

ID - 477

T1 - Family variables and physical activity in preschool children

A1 - Sallis,J.F.

A1 - Patterson,T.L.

A1 - McKenzie,T.L.

A1 - Nader,P.R.

Y1 - 1988/04//

N1 - Sallis, J F. Patterson, T L. McKenzie, T L. Nader, P R

Journal of developmental and behavioral pediatrics : JDBP

htf, 8006933

IM

Journal Article. Research Support, U.S. Gov't, P.H.S.

English

KW - Medline

KW - Body Weight

KW - Child

KW - Preschool

KW - Coronary Disease/ge [Genetics]

KW - Female

KW - Humans

KW - Imitative Behavior

KW - Male

KW - Motor Activity

KW - Obesity/ge [Genetics]

KW - Parents

KW - Physical Exertion

KW - Play and Playthings

KW - Schools

KW - Nursery

KW - Type A Personality

RP - NOT IN FILE

SP - 57

EP - 61

JF - Journal of Developmental & Behavioral Pediatrics

JA - J Dev.Behav Pediatr

VL - 9

IS - 2

CY - UNITED STATES

N2 - Correlates of the physical activity habits of preschool children were studied in a multiethnic sample. Physical activity levels of 33 low-income children were observed systematically during free-play periods at preschool. Children spent 58% of free-play time in sedentary activities (e.g., sitting), and were vigorously active only 11% of the time. Independent variables studied were child body mass index (BMI), teacher-rated Type A behavior, and parent-reported mother BMI, father BMI, parent vigorous activity, and family cardiovascular disease (CVD) risk. The multiple regression of moderate-intensity activity was significant, with family CVD risk, parent vigorous activity, and father BMI accounting for significant amounts of variance. The results suggest that the effects of parental role modeling on child physical activity levels may extend to free-play settings far beyond the confines of the home environment

SN - 0196-206X

AD - Department of Pediatrics, University of California, San Diego, La Jolla 92093-0631

UR - 3366911

ER -

TY - JOUR

ID - 478

T1 - Recreational waterslide injuries

A1 - Saunders,C.E.

Y1 - 1988/02//

N1 - Saunders, C E

Southern medical journal

uvh, 0404522

AIM, IM

Journal Article

English

KW - Medline

KW - Adolescent

KW - Adult

KW - Child

KW - Preschool

KW - Female

KW - Humans

KW - Male

KW - Middle Aged

KW - Play and Playthings

KW - Safety

KW - Wounds and Injuries/ep [Epidemiology]

KW - Wounds and Injuries/et [Etiology]

KW - Wounds and Injuries/pc [Prevention & Control]

RP - NOT IN FILE

SP - 189

EP - 192

JF - Southern Medical Journal

JA - South Med J

VL - 81

IS - 2

CY - UNITED STATES

N2 - Recreational waterslide facilities are a growing phenomenon in the United States, and injuries associated with their use are beginning to appear. Although there have been fatalities, the vast majority of injuries are minor, and occur over a large denominator of slide rides. The overall incidence of injuries is low, though the incidence varies from one facility to another. If safety practices and design features are implemented, waterslide use may become safer. Epidemiologic data will be required to clearly identify the optimal features of injury prevention

SN - 0038-4348

AD - Department of Surgery, University of Colorado Health Sciences Center, Denver

UR - 3340872

ER -

TY - JOUR

ID - 479

T1 - Toys. Good, bad, but never indifferent

A1 - Osterhout,S.K.

Y1 - 1987/12//

N1 - Osterhout, S K

North Carolina medical journal

ntx, 2984805r

IM

Journal Article

English

KW - Medline

KW - Child

KW - Consumer Advocacy

KW - Consumer Product Safety

KW - Humans

KW - Play and Playthings/st [Standards]

KW - Safety

KW - United States

RP - NOT IN FILE

SP - 645

EP - 649

JF - North Carolina Medical Journal

JA - N.C.Med J

VL - 48

IS - 12

CY - UNITED STATES

SN - 0029-2559

UR - 3480437

ER -

TY - JOUR

ID - 480

T1 - Sexual abuse in vulnerable and high risk children

A1 - Cohen,T.B.

A1 - Galenson,E.

A1 - van,Leeuwen K.

A1 - Steele,B.F.

A1 - Sherkow,S.P.

A1 - Etezady,M.H.

Y1 - 1987///

N1 - Cohen, T B. Galenson, E. van Leeuwen, K. Steele, B F. Sherkow, S P. Etezady, M H

Child abuse & neglect

can, 7801702

IM

Case Reports. Journal Article

English

KW - Medline

KW - Anxiety

KW - Castration

KW - Child

KW - Child Abuse

KW - Sexual/px [Psychology]

KW - Preschool

KW - Female  
KW - Humans  
KW - Incest  
KW - Male  
KW - Mother-Child Relations  
KW - Play and Playthings  
KW - Psychosexual Development  
KW - Risk Factors  
KW - Sexual Dysfunctions  
KW - Psychological/et [Etiology]  
RP - NOT IN FILE  
SP - 461  
EP - 474  
JF - Child Abuse & Neglect  
JA - Child Abuse Negl.  
VL - 11  
IS - 3  
CY - ENGLAND  
SN - 0145-2134  
UR - 3676899  
ER -  
  
TY - JOUR  
ID - 481  
T1 - Home Screening Questionnaire: its validity in assessing home environment  
A1 - Frankenburg, W.K.  
A1 - Coons, C.E.  
Y1 - 1986/04//  
N1 - Frankenburg, W K. Coons, C E  
The Journal of pediatrics  
j1z, 0375410  
AIM, IM  
Journal Article  
English  
KW - Medline  
KW - Child  
KW - Child Development  
KW - Preschool  
KW - Cognition  
KW - Educational Status  
KW - Evaluation Studies as Topic  
KW - Hispanic Americans  
KW - Humans  
KW - Infant  
KW - Newborn  
KW - Male  
KW - Parent-Child Relations  
KW - Play and Playthings  
KW - Questionnaires  
KW - Risk  
KW - Social Environment  
KW - Socioeconomic Factors  
RP - NOT IN FILE  
SP - 624  
EP - 626  
JF - Journal of Pediatrics



JA - J Pediatr

VL - 108

IS - 4

CY - UNITED STATES

N2 - To develop a quick, practical tool to identify home environments likely to be suboptimal for the development of children, we adapted segments of the Home Observation for Measurement of the Environment (HOME) Inventory, which assesses the environments of children from birth to 6 years, and devised the Home Screening Questionnaire (HSQ). Whereas the HOME Inventory requires a home visit, the HSQ consists of two forms, one for children from birth to 3 years, another for 3 to 6 years, that are completed by parents without a home visit. The questions are formulated at the third to sixth grade reading level and can be completed in 15 to 20 minutes. Scoring and interpretation by a professional takes 5 minutes. HSQ questions were answered by more than 1500 parents of low-income families. Between 81% and 86% of the environments determined to be of concern by the HOME Inventory were identified by the briefer and less expensive HSQ. Thus the HSQ readily lends itself to use by health care providers who serve low-income families

SN - 0022-3476

UR - 3958839

ER -

TY - JOUR

ID - 482

T1 - Mediating influences of social support: personal, family, and child outcomes

A1 - Dunst,C.J.

A1 - Trivette,C.M.

A1 - Cross,A.H.

Y1 - 1986/01//

N1 - Dunst, C J. Trivette, C M. Cross, A H

American journal of mental deficiency

3ma, 0372647

IM

Journal Article. Research Support, Non-U.S. Gov't. Research Support, U.S. Gov't, P.H.S.

English

KW - Medline

KW - Attitude

KW - Child Development

KW - Child

KW - Preschool

KW - Developmental Disabilities/px [Psychology]

KW - Disabled Persons/px [Psychology]

KW - Family

KW - Female

KW - Humans

KW - Intellectual Disability/px [Psychology]

KW - Male

KW - Parent-Child Relations

KW - Social Class

KW - Social Environment

KW - Social Support

RP - NOT IN FILE

SP - 403

EP - 417

JF - American Journal of Mental Deficiency

JA - Am J Ment.Defic.

VL - 90

IS - 4

CY - UNITED STATES

N2 - The mediating influences of social support were examined in a study of 137 parents of mentally retarded, physically impaired, and developmentally at-risk children. Social system theory was used as a conceptual framework for assessing the effects of social support on personal well-being, parental attitudes toward their child, family integrity, parental perceptions of child functioning, parent-child play opportunities, and child behavior and development. A series of hierarchical multiple regression analyses by sets, controlling for family SES and income, child sex and age, and child developmental quotient and diagnosis showed that both satisfaction with support and number of sources of support had main and/or interactive effects in all sets of outcome measures. More supportive social networks were associated with better personal well-being, more positive attitudes, and more positive influences on parent-child play opportunities and child behavior and development. Findings were discussed in terms of both methodological and conceptual contributions to understanding the broad-based influences of social support

SN - 0002-9351

UR - 2418680

ER -

TY - JOUR

ID - 483

T1 - Leads from the MMWR. Toy safety--United States, 1984

Y1 - 1986/01/17/

N1 - JAMA : the journal of the American Medical Association

7501160

AIM, IM

Journal Article

English

KW - Medline

KW - Accidents

KW - Adolescent

KW - Child

KW - Preschool

KW - Consumer Product Safety

KW - Humans

KW - Mortality

KW - Play and Playthings

KW - Safety

KW - United States

KW - Wounds and Injuries/ep [Epidemiology]

KW - Wounds and Injuries/et [Etiology]

RP - NOT IN FILE

SP - 312

EP - 313

JF - JAMA

VL - 255

IS - 3

CY - UNITED STATES

SN - 0098-7484

UR - 3941508

ER -

TY - JOUR

ID - 484

T1 - Toy safety--United States, 1984

A1 - Centers for Disease Control (CDC)

Y1 - 1984///

N1 - Centers for Disease Control (CDC)

MMWR. Morbidity and mortality weekly report

ne8, 7802429

IM

Journal Article

English

KW - Medline

KW - Accidents

KW - Adolescent

KW - Child

KW - Preschool

KW - Consumer Product Safety

KW - Humans

KW - Mortality

KW - Play and Playthings

KW - Safety

KW - United States

KW - Wounds and Injuries/ep [Epidemiology]

KW - Wounds and Injuries/et [Etiology]

RP - NOT IN FILE

SP - 755

EP - 756

JF - MMWR - Morbidity & Mortality Weekly Report

JA - MMWR Morb.Mortal.Wkly.Rep.

VL - 34

IS - 50

CY - UNITED STATES

SN - 0149-2195

UR - 3934519

ER -

TY - JOUR

ID - 485

T1 - At-risk toddlers and their mothers: the special case of physical handicap

A1 - Wasserman,G.A.

A1 - Allen,R.

A1 - Solomon,C.R.

Y1 - 1985/02//

N1 - Wasserman, G A. Allen, R. Solomon, C R

Child development

0372725, d28

IM

Journal Article. Research Support, Non-U.S. Gov't. Research Support, U.S. Gov't, P.H.S.

English

KW - Medline

KW - Child Behavior

KW - Child Development

KW - Child

KW - Preschool

KW - Congenital Abnormalities/px [Psychology]

KW - Disabled Persons/px [Psychology]

KW - Female

KW - Humans

KW - Infant

KW - Newborn

KW - Premature

KW - Diseases/px [Psychology]

KW - Male

KW - Maternal Behavior

KW - Mother-Child Relations

KW - Play and Playthings

KW - Risk

KW - Social Behavior

RP - NOT IN FILE

SP - 73

EP - 83

JF - Child Development

JA - Child Dev.

VL - 56

IS - 1

CY - UNITED STATES

N2 - Previous studies of school-aged children with physical handicaps indicate passivity, inhibition, and deficits in cognitive-linguistic functioning, sometimes interpreted as consequent to parent-child problems. The present study examined the functioning of toddlers with physical anomalies (but without CNS damage) in comparison to premature toddlers (who share deviant early experience but not deviant physical appearance) and to normal toddlers. 14 mother-child pairs in each group were videotaped at 9, 12, 18, and 24 months in a variety of semistructured situations. Both premature and handicapped toddlers performed more poorly in measures of social initiative, focused play, language production, and 2-year IQ. In addition, handicapped toddlers manifested increased distractibility, decreased compliance, and reluctance to separate from their mothers. Mothers of both prematures and handicapped toddlers were more initiating and less responsive than controls, while mothers of handicapped children were also more likely to both encourage and ignore their toddlers. Patterns previously reported for older children are therefore found here with toddlers. Maternal patterns are interpreted as supporting Bell's model of compensatory "lower-limit" effects

SN - 0009-3920

UR - 3157552

ER -

TY - JOUR

ID - 486

T1 - Legal approaches to injury prevention

A1 - Swartz,E.M.

Y1 - 1985/02//

N1 - Swartz, E M

Pediatric clinics of North America

oum, 0401126

AIM, IM

Journal Article

English

KW - Medline

KW - Child

KW - Child Advocacy/lj [Legislation & Jurisprudence]

KW - Expert Testimony

KW - Humans

KW - Legislation as Topic

KW - Physician's Role

KW - Play and Playthings

KW - Safety

KW - United States

KW - Wounds and Injuries/pc [Prevention & Control]

RP - NOT IN FILE

SP - 213

EP - 219

JF - Pediatric Clinics of North America

JA - Pediatr Clin.North Am

VL - 32

IS - 1

CY - UNITED STATES

N2 - Injury prevention can be achieved, but it will require a fundamental reexamination of our approach to injury causation. We must learn to examine the manufacturing and marketing practices of companies that produce the products associated with children's injuries, for these are the real culprits in our national childhood injury plague. Most importantly, we must learn to demand from industry that it take injury prevention seriously. If it refuses to do so it must face the consequences before the American system of justice. Legal advocacy can be a valuable tool in this effort. The legal system provides the means to pierce the corporate veil of secrecy and to learn how and why products are made of hazardous design. Under the light of public scrutiny, culprit companies can be made to pay the price for producing hazardous products. Only in this manner will industry be given the incentive to increase product safety

SN - 0031-3955

UR - 3975090

ER -

TY - JOUR

ID - 487

T1 - Injuries at play

A1 - Greensher,J.

A1 - Mofenson,H.C.

Y1 - 1985/02//

N1 - Greensher, J. Mofenson, H C

Pediatric clinics of North America

om, 0401126

AIM, IM

Journal Article

English

KW - Medline

KW - Child

KW - Preschool

KW - Humans

KW - Infant

KW - Play and Playthings

KW - Risk

KW - Safety

KW - Walkers/ae [Adverse Effects]

KW - Wounds and Injuries/et [Etiology]

KW - Wounds and Injuries/pc [Prevention &amp; Control]

RP - NOT IN FILE

SP - 127

EP - 139

JF - Pediatric Clinics of North America

JA - Pediatr Clin.North Am

VL - 32

IS - 1

CY - UNITED STATES

N2 - The problem of toy-related injuries is a complicated one. The authors detail specific hazards related to toys, playgrounds, skateboards, and baby walkers. Guidelines are provided for toy suitability for children of all ages

SN - 0031-3955

UR - 3975083

ER -

TY - JOUR

ID - 488

T1 - Are toy guns too dangerous?

A1 - Tanz,R.  
A1 - Christoffel,K.K.  
A1 - Sagerman,S.  
Y1 - 1985/02//  
N1 - Tanz, R. Christoffel, K K. Sagerman, S  
Pediatrics  
oxv, 0376422  
AIM, IM  
Journal Article. Research Support, Non-U.S. Gov't  
English  
KW - Medline  
KW - Accident Prevention  
KW - Adolescent  
KW - Adult  
KW - Child  
KW - Preschool  
KW - Consumer Product Safety  
KW - Female  
KW - Humans  
KW - Infant  
KW - Newborn  
KW - Legislation as Topic  
KW - Male  
KW - Play and Playthings  
KW - Safety  
KW - United States  
KW - Wounds and Injuries/ep [Epidemiology]  
KW - Wounds and Injuries/pc [Prevention & Control]  
RP - NOT IN FILE  
SP - 265  
EP - 268  
JA - Pediatrics  
VL - 75  
IS - 2  
CY - UNITED STATES  
N2 - Toy guns with projectiles may injure young children. A study was undertaken to assess the danger posed by these toys and the regulations governing them. US Consumer Product Safety Commission (CPSC) data indicate that toy guns with projectiles cause relatively few injuries, mostly to young boys. The magnitude of the problem is smaller than that of nonpowder and powder firearms. Most often, toy gun injuries are to the face and eyes. Of the estimated 818 injuries in 1980 and 1981, 2.9% required hospitalization. More than 400 days were lost from school and work, and there were nearly 3,000 days of restricted activity due to these toy gun injuries. The hazard posed by toy guns with projectiles can be reduced through the legitimate regulatory authority of the Consumer Product Safety Commission with minor impact on retail cost, toy industry sales, and the play value of the toys. The yearly cost to consumers from increased regulation would probably be similar to the annual cost of the injuries. Regulation is warranted to protect young children who use these toys  
SN - 0031-4005  
UR - 3969326  
ER -  
  
TY - JOUR  
ID - 489  
T1 - Behavioral assessment and treatment of chronic food refusal in handicapped children  
A1 - Riordan,M.M.  
A1 - Iwata,B.A.  
A1 - Finney,J.W.  
A1 - Wohl,M.K.

A1 - Stanley,A.E.

Y1 - 1984///

N1 - Riordan, M M. Iwata, B A. Finney, J W. Wohl, M K. Stanley, A E

Journal of applied behavior analysis

0174763, hdr

IM

Case Reports. Journal Article. Research Support, U.S. Gov't, P.H.S.

English

KW - Medline

KW - Behavior Therapy/mt [Methods]

KW - Cerebral Palsy/co [Complications]

KW - Child

KW - Preschool

KW - Disabled Persons

KW - Eating Disorders/co [Complications]

KW - Eating Disorders/di [Diagnosis]

KW - Eating Disorders/th [Therapy]

KW - Failure to Thrive/co [Complications]

KW - Female

KW - Food Preferences

KW - Hemiplegia/co [Complications]

KW - Humans

KW - Hydrocephalus/co [Complications]

KW - Infant

KW - Male

KW - Play and Playthings

KW - Reinforcement

KW - Social

KW - Seizures/co [Complications]

KW - Vision Disorders/co [Complications]

RP - NOT IN FILE

SP - 327

EP - 341

JF - Journal of Applied Behavior Analysis

JA - J Appl.Behav Anal.

VL - 17

IS - 3

CY - UNITED STATES

N2 - In this study, we examined the eating behavior of four handicapped children, none of whom exhibited self-feeding skills. All children had a history of food refusal and were nutritionally at risk; one child received all nourishment by way of gastrostomy tube. Baseline data taken during mealtimes indicated that all children accepted very little food, expelled food frequently, and engaged in a number of disruptive behaviors. Treatments consisted of one or more of the following contingent events: social praise, access to preferred foods, brief periods of toy play, and forced feeding. Results of multiple-baseline and reversal designs showed marked behavioral improvement for each child and increases in the amount of food consumed. Further improvements were noted at follow-up, which ranged from 7 to 30 months posttreatment

SN - 0021-8855

UR - 6239853

ER -

TY - JOUR

ID - 490

T1 - Playing it safe. Three. Making a sensible choice

A1 - Dann,C.

Y1 - 1984/11/07/

N1 - Dann, C  
Nursing times  
0423236, o9u  
N  
Journal Article  
English  
KW - Medline  
KW - Accident Prevention  
KW - Child  
KW - Great Britain  
KW - Humans  
KW - Legislation as Topic  
KW - Play and Playthings  
KW - Safety  
RP - NOT IN FILE  
SP - 56  
EP - 57  
JF - Nursing Times  
JA - Nurs Times  
VL - 80  
IS - 45  
CY - ENGLAND  
SN - 0954-7762  
UR - 6568626  
ER -  
  
TY - JOUR  
ID - 491  
T1 - Playing it safe. Two. Toy libraries  
A1 - Swaffield,L.  
Y1 - 1984/11/07/  
N1 - Swaffield, L  
Nursing times  
0423236, o9u  
N  
Bibliography. Journal Article  
English  
KW - Medline  
KW - Accident Prevention  
KW - Bibliography as Topic  
KW - Child  
KW - Preschool  
KW - Humans  
KW - Play and Playthings  
KW - Safety  
RP - NOT IN FILE  
SP - 55  
EP - 56  
JF - Nursing Times  
JA - Nurs Times  
VL - 80  
IS - 45  
CY - ENGLAND  
SN - 0954-7762  
UR - 6390351  
ER -



TY - JOUR  
ID - 492  
T1 - Playing it safe: top ten toys 1985  
A1 - Swaffield,L.  
Y1 - 1984/11/07/  
N1 - Swaffield, L  
Nursing times  
0423236, o9u  
N  
Journal Article  
English  
KW - Medline  
KW - Accident Prevention  
KW - Child  
KW - Preschool  
KW - Humans  
KW - Infant  
KW - Play and Playthings  
KW - Safety  
RP - NOT IN FILE  
SP - 53  
EP - 54  
JF - Nursing Times  
JA - Nurs Times  
VL - 80  
IS - 45  
CY - ENGLAND  
SN - 0954-7762  
UR - 6568625  
ER -

TY - JOUR  
ID - 493  
T1 - [Methodological approach to the hygienic evaluation of toys made of polymer materials]. [Russian]  
A1 - Stan,V.V.  
Y1 - 1984/08//  
N1 - Stan, V V  
Gigiena i sanitariia  
fpz, 0412700  
IM  
Journal Article  
Russian  
KW - Medline  
KW - Child  
KW - Preschool  
KW - Humans  
KW - Hygiene  
KW - Infant  
KW - methods  
KW - Play and Playthings  
KW - Polymers/an [Analysis]  
KW - Polymers/to [Toxicity]  
KW - Safety  
RP - NOT IN FILE  
SP - 32

EP - 35

JF - *Gigiena i Sanitariia*

JA - *Gig.Sanit.*

IS - 8

CY - USSR

SN - 0016-9900

UR - 6489777

ER -

TY - JOUR

ID - 494

T1 - Are test materials toys? A reply to Ridenour and Reid

A1 - Bayley,N.

A1 - Hunt,J.V.

Y1 - 1983/12//

N1 - Bayley, N. Hunt, J V

Perceptual and motor skills

ozb, 0401131

IM

Journal Article

English

KW - Medline

KW - Accident Prevention

KW - Child

KW - Preschool

KW - Humans

KW - Infant

KW - Play and Playthings

KW - Psychological Tests/is [Instrumentation]

KW - Safety

RP - NOT IN FILE

SP - 1270

JA - Perceptual & Motor Skills

VL - 57

IS - 3 Pt 2

CY - UNITED STATES

SN - 0031-5125

UR - 6664803

ER -

TY - JOUR

ID - 495

T1 - [Development of methodical principles and approval of new forms of contact with school children (ages 12-13 years) in carrying out preventive measures (results of a pilot study)]. [Russian]

A1 - Mukhamedzhanova,R.F.

A1 - Suslova,E.A.

A1 - Gusev,G.V.

A1 - Chazova,L.V.

A1 - Dobo,S.S.

Y1 - 1983///

N1 - Mukhamedzhanova, R F. Suslova, E A. Gusev, G V. Chazova, L V. Dobo, S S

Bulleten' Vsesoiuznogo kardiologicheskogo nauchnogo tsentra AMN SSSR

ahs, 8003723

IM

English Abstract. Journal Article

Russian

KW - Medline  
 KW - Adolescent  
 KW - Blood Pressure  
 KW - Body Height  
 KW - Body Weight  
 KW - Cardiovascular Diseases/pc [Prevention & Control]  
 KW - Child  
 KW - Female  
 KW - Health Promotion  
 KW - Humans  
 KW - Male  
 KW - Mass Screening  
 KW - Moscow  
 KW - Physical Exertion  
 KW - Pilot Projects  
 KW - Play and Playthings  
 KW - Preventive Medicine/mt [Methods]  
 KW - Risk  
 KW - Sex Factors  
 RP - NOT IN FILE  
 SP - 82  
 EP - 88  
 JF - Biulleten Vsesoiuznogo Kardiologicheskogo Nauchnogo Tsentra Amn SSSR  
 JA - Biull.Vsesoiuznogo Kardiol.Nauchn.Tsentra AMN SSSR  
 VL - 6  
 IS - 2  
 CY - USSR  
 N2 - The results of the screening and 1-year follow-up of pupils from two Moscow schools of general education (Moscow secondary schools) are presented. The program on preventive measures was conducted by using the playing forms of contact and influence, at one of the above schools (experimental school). Most of the adolescents of the experimental school (mean 80%) participated in the preventive measures. By the completion of the program the number of the participants increased up to 94%. A reliably significant increase in the education level on the problems about the adverse effects of smoking and beneficial effects of regular nutrition in adolescents of the experimental school was observed. The analysis of the results of the screening and follow-up of schoolchildren aged 12-13 years enables us to conclude that it is necessary to work out new criteria for the assessment of preventive measures among adolescents  
 SN - 0201-7369  
 UR - 6639762  
 ER -  
  
 TY - JOUR  
 ID - 496  
 T1 - Intervention approaches to conduct disorders in young children. [Review] [41 refs]  
 A1 - Webster-Stratton,C.  
 Y1 - 1983///  
 N1 - Webster-Stratton, C  
 The Nurse practitioner  
 oa1, 7603663  
 IM, N  
 Journal Article. Review  
 English  
 KW - Medline  
 KW - Adult  
 KW - Aggression  
 KW - Behavior Therapy  
 KW - Child

KW - Child Behavior  
KW - Child Behavior Disorders/di [Diagnosis]  
KW - Child Behavior Disorders/px [Psychology]  
KW - Child Behavior Disorders/th [Therapy]  
KW - Child Rearing  
KW - Preschool  
KW - Cooperative Behavior  
KW - Humans  
KW - Nursing Assessment  
KW - Nursing Process  
KW - Parent-Child Relations  
KW - Parents/ed [Education]  
KW - Play and Playthings  
KW - Reinforcement  
KW - Social

RP - NOT IN FILE

SP - 23

EP - 24. 33-34

JF - Nurse Practitioner

JA - Nurse Pract

VL - 8

IS - 5

CY - UNITED STATES

N2 - The scope of the problem in regard to childhood aggression or conduct disorders is large and far exceeds the resources for dealing with them. Moreover, such children are at high risk for developing serious adolescent and adult psychological problems. Nurse practitioners are placed in strategic positions to be able to screen for, identify and treat early signs of conduct disorders in young children. This review describes assessment procedures and the essential components of a parent training program designed to help families reduce childhood aggression. By intervening with families early, nurse practitioners may be able to design effective preventive programs and improve the prognosis for these children. [References: 41]

SN - 0361-1817

UR - 6346154

ER -

TY - JOUR

ID - 497

T1 - [Hygienic requirements for children's toys]. [Russian]

A1 - Prokof'eva,N.G.

A1 - Koval'chuk,E.N.

Y1 - 1982///

N1 - Prokof'eva, N G. Koval'chuk, E N

Fel'dsher i akusherka

eva, 16930040r

N

Journal Article

Russian

KW - Medline

KW - Age Factors

KW - Child

KW - Child Development

KW - Preschool

KW - Humans

KW - Hygiene

KW - Infant

KW - Play and Playthings

KW - Safety

RP - NOT IN FILE

SP - 11

EP - 14

JF - Feldsher i Akusherka

JA - Feldsher Akush.

VL - 47

IS - 3

CY - USSR

SN - 0014-9772

UR - 6918301

ER -

TY - JOUR

ID - 498

T1 - Childhood injuries: recognition and prevention

A1 - Berger,L.R.

Y1 - 1981/11//

N1 - Berger, L R

Current problems in pediatrics

dvf, 1272515

IM

Journal Article

English

KW - Medline

KW - Accident Prevention

KW - Accidents

KW - Traffic/pc [Prevention & Control]

KW - Athletic Injuries/pc [Prevention & Control]

KW - Automobile Driving

KW - Burns/pc [Prevention & Control]

KW - Child

KW - Female

KW - Health Education

KW - Humans

KW - Male

KW - Play and Playthings

KW - Risk

KW - Safety

KW - Seat Belts

KW - Wounds and Injuries/ep [Epidemiology]

KW - Wounds and Injuries/pc [Prevention & Control]

RP - NOT IN FILE

SP - 1

EP - 59

JF - Current Problems in Pediatrics

JA - Curr.Probl.Pediatr

VL - 12

IS - 1

CY - UNITED STATES

SN - 0045-9380

UR - 7318498

ER -

TY - JOUR

ID - 499

T1 - Attentiveness and responsiveness to auditory stimuli of children at risk for mental retardation

A1 - Finkelstein,N.W.

A1 - Gallagher,J.J.

A1 - Farran,D.C.

Y1 - 1980/09//

N1 - Finkelstein, N W. Gallagher, J J. Farran, D C

American journal of mental deficiency

3ma, 0372647

IM

Journal Article. Research Support, U.S. Gov't, P.H.S.

English

KW - Medline

KW - Attention

KW - Auditory Perception

KW - Child

KW - Preschool

KW - Female

KW - Humans

KW - Intellectual Disability/px [Psychology]

KW - Intellectual Disability/rh [Rehabilitation]

KW - Male

KW - Play and Playthings

KW - Psychological Tests

KW - Risk

KW - Speech Perception

KW - Visual Perception

RP - NOT IN FILE

SP - 135

EP - 144

JF - American Journal of Mental Deficiency

JA - Am J Ment.Defic.

VL - 85

IS - 2

CY - UNITED STATES

N2 - The major hypothesis in the present study was that differences between high-risk and low-risk children in performance on standardized tests of cognitive ability would be explained, in part, by differences in attentiveness to auditory stimuli and differences in task orientation. The data collected revealed the anticipated higher standardized test scores for low-risk children. Within the high-risk sample, few differences were found between children who attended an intervention day-care program and those who did not. Measures from a laboratory task and a free-play observation suggested that attention is a key factor in understanding the high-risk child's development and also that differences in attention between high- and low-risk children can be reliably obtained as early as 3 years of age. A lessened attention span was demonstrated by high-risk children to both auditory and visual stimuli if either were complex or demanding

SN - 0002-9351

UR - 7446581

ER -

TY - JOUR

ID - 500

T1 - Strangulation in childhood: epidemiology and clinical course

A1 - Feldman,K.W.

A1 - Simms,R.J.

Y1 - 1980/06//

N1 - Feldman, K W. Simms, R J

Pediatrics

oxv, 0376422

AIM, IM

Journal Article

English

KW - Medline

KW - Accident Prevention

KW - Accidents

KW - Home

KW - Adolescent

KW - Asphyxia/co [Complications]

KW - Asphyxia/ep [Epidemiology]

KW - Asphyxia/et [Etiology]

KW - Beds/st [Standards]

KW - Brain Damage

KW - Chronic/et [Etiology]

KW - Child

KW - Preschool

KW - Clothing

KW - Equipment and Supplies/st [Standards]

KW - Female

KW - Government Agencies

KW - Humans

KW - Hypoxia

KW - Brain/et [Etiology]

KW - Infant

KW - Newborn

KW - Male

KW - Play and Playthings

KW - Safety

KW - Sudden Infant Death/et [Etiology]

KW - Suicide

KW - United States

RP - NOT IN FILE

SP - 1079

EP - 1085

JA - Pediatrics

VL - 65

IS - 6

CY - UNITED STATES

N2 - A review of 233 cases of childhood strangulation was made to determine injury epidemiology. Consistent patterns of injury were observed. Crib and playground equipment strangulations are already the subject of Consumer Product Safety Commission (CPSC) preventative regulations. High chair-, playpen mesh-, pacifier cord-, and clothing-related injuries would be amenable to prevention by improved product safety regulation. The CPSC has been petitioned to remedy the first two of these hazards. Many crib and rope strangulations can only be prevented by direct patient counseling. Although Congress empowered and required the CPSC to recognize and correct unsafe products, its surveillance systems may obscure the very design defects that cause injury. Likewise, political considerations may slow enactment of new design regulations. Physicians who treat childhood accident victims are in a position to recognize hazardous products and lobby for their improvement. Of the 233 cases 38 were further evaluated to delineate the clinical course of childhood strangulation. Victims who fail to resume normal cardiopulmonary function by the time of hospitalization have a poor prognosis for neurologic recovery with current modes of therapy. Improved treatment of hypoxic and ischemic cerebral injury might prevent some of the deaths and handicaps resulting from strangulation

SN - 0031-4005

UR - 7375230

ER -

TY - JOUR

ID - 501

T1 - Migration and mental illness: what role do traditional childhood socialization practices play?

A1 - Danna,J.J.

Y1 - 1980/03//

N1 - Danna, J J

Culture, medicine and psychiatry

dt5, 7707467

IM, J

Comparative Study. Journal Article

English

KW - Medline

KW - Australia

KW - Child

KW - Child Rearing

KW - Cross-Cultural Comparison

KW - Female

KW - Humans

KW - Male

KW - Mental Disorders/et [Etiology]

KW - Sicily/eh [Ethnology]

KW - SOCIALIZATION

KW - Transients and Migrants

KW - United States

KW - Urbanization

RP - NOT IN FILE

SP - 25

EP - 42

JF - Culture, Medicine & Psychiatry

JA - Cult.Med Psychiatry

VL - 4

IS - 1

CY - NETHERLANDS

N2 - Interpretations of studies which show a correlation between migration and mental illness generally focus on sociocultural variables while giving scant attention to determinants of cognitive-personality orientations. This article examines childhood socialization practices as a key variable for comparing points of psychological stress between the traditional rural culture and the post-industrial urban culture. The hypothesis that harsh and restrictive childhood socialization practices foster the development of a cognitive-personality orientation which increases the likelihood of maladaptive responses to culture change is illustrated by anthropological and psychological data obtained from Sicilians living in Sicily, the U.S.A. and Australia. Suggestions are given for minimizing the mental health risks involved during the critical transition period following migration

SN - 0165-005X

UR - 7371420

ER -

TY - JOUR

ID - 502

T1 - Play aids for the handicapped: children - safely - at play

A1 - Marais,E.

Y1 - 1980/02/07/

N1 - Marais, E

Nursing mirror

o98, 7708429

N

Journal Article

English

KW - Medline

KW - Child



KW - Disabled Persons  
KW - Humans  
KW - Play and Playthings  
KW - Safety  
RP - NOT IN FILE  
SP - 26  
EP - 27  
JF - Nursing Mirror  
JA - Nurs Mirror  
VL - 150  
IS - 6  
CY - ENGLAND  
SN - 0029-6511  
UR - 6444716  
ER -

TY - JOUR

ID - 503

T1 - Peer preferences of at-risk and normally developing children in a preschool mainstream classroom

A1 - Cavallaro,S.A.

A1 - Porter,R.H.

Y1 - 1980/01//

N1 - Cavallaro, S A. Porter, R H

American journal of mental deficiency

3ma, 0372647

IM

Journal Article. Research Support, U.S. Gov't, P.H.S.

English

KW - Medline

KW - Child Development

KW - Child

KW - Preschool

KW - Education of Intellectually Disabled

KW - Eye Movements

KW - Female

KW - Group Processes

KW - Humans

KW - Intellectual Disability/px [Psychology]

KW - Interpersonal Relations

KW - Male

KW - Peer Group

KW - Play and Playthings

KW - Risk

KW - Social Adjustment

RP - NOT IN FILE

SP - 357

EP - 366

JF - American Journal of Mental Deficiency

JA - Am J Ment.Defic.

VL - 84

IS - 4

CY - UNITED STATES

N2 - Social interactions and peer preferences in a preschool mainstream classroom containing normally developing and at-risk children were studied using the ethological method of direct observation. Data on social play and on gaze orientation indicated that normally developing children and at-risk children interacted primarily with children from the same group (other normally developing and at-risk children, respectively). Data

on selection on game partner and on preference of seat neighbor, however, revealed peer preference by normally developing children only. The findings were discussed as having theoretical implications for using direct observation vs. the more traditional sociometric methods for studying social adaptation in the mainstream classroom and as having practical implications for mainstreaming at risk-preschoolers

SN - 0002-9351

UR - 7355909

ER -

TY - JOUR

ID - 504

T1 - The child at risk in play

A1 - Morris,B.

Y1 - 1979/09//

N1 - Morris, B

The New Zealand nursing journal. Kai tiaki

19110850r, obt

N

Journal Article

English

KW - Medline

KW - Accident Prevention

KW - Child

KW - Child Advocacy

KW - Humans

KW - Play and Playthings

KW - Recreation

KW - Safety

RP - NOT IN FILE

SP - 5

EP - 6

JF - New Zealand Nursing Journal

JA - N.Z.Nurs J

VL - 72

IS - 9

CY - NEW ZEALAND

SN - 0028-8535

UR - 291817

ER -

TY - JOUR

ID - 505

T1 - Providing a safe environment for children

A1 - Brown,V.

Y1 - 1978/01//

N1 - Brown, V

MCN. The American journal of maternal child nursing

ma3, 7605941

N

Journal Article

English

KW - Medline

KW - Accident Prevention

KW - Beds/st [Standards]

KW - Child

KW - Preschool

KW - Environment

KW - Humans  
KW - Infant  
KW - Play and Playthings  
KW - Safety  
RP - NOT IN FILE  
SP - 53  
EP - 55  
JF - MCN, American Journal of Maternal Child Nursing  
JA - MCN Am J Matern.Child Nurs  
VL - 3  
IS - 1  
CY - UNITED STATES  
SN - 0361-929X  
UR - 414042  
ER -

TY - JOUR  
ID - 506  
T1 - Toy safety in hospitals--or beware of parents bearing gifts  
A1 - Frank,D.J.  
A1 - Drobish,N.L.  
Y1 - 1975/04//  
N1 - Frank, D J. Drobish, N L

Clinical pediatrics  
dhe, 0372606, 8407647

AIM, IM  
Journal Article  
English  
KW - Medline  
KW - Accident Prevention  
KW - Child  
KW - Hospitalized  
KW - Preschool  
KW - Humans  
KW - Male  
KW - Parents  
KW - Play and Playthings  
KW - Safety

RP - NOT IN FILE  
SP - 400  
EP - 402  
JF - Clinical Pediatrics  
JA - Clin.Pediatr (Phila)  
VL - 14  
IS - 4

CY - UNITED STATES

N2 - Toys are an indispensable component of play therapy for hospitalized children. They can also be dangerous and may result in catastrophic accidents. Extreme care should be exercised in the purchase of "safe toys" for all infants and children in and out of the hospital. The guidelines of the Bureau of Product Safety of the Federal Drug Administration (FDA) dealing with toy safety can be very helpful for child care professionals as well as parents who purchase toys. An explanation of the additional environmental hazards of toys in hospital settings should be an important part of the total in-service training of all personnel who care for infants and children in hospitals. In addition, it might be well for the Division of Product Safety of the FDA to consider criteria for toy safety in hospitals as a separate category in future Bulletins dealing with this problem

SN - 0009-9228  
UR - 1120384

ER -

TY - JOUR

ID - 507

T1 - Follow-up of infants at risk of minor brain dysfunction

A1 - Kalverboer,A.F.

A1 - Touwen,B.C.

A1 - Prechtl,H.F.

Y1 - 1973/02/28/

N1 - Kalverboer, A F. Touwen, B C. Prechtl, H F

Annals of the New York Academy of Sciences

5nm, 7506858

IM

Journal Article

English

KW - Medline

KW - Attention Deficit Disorder with Hyperactivity/co [Complications]

KW - Attention Deficit Disorder with Hyperactivity

KW - Child Behavior

KW - Child

KW - Preschool

KW - Exploratory Behavior

KW - Female

KW - Fixation

KW - Ocular

KW - Follow-Up Studies

KW - Humans

KW - Hyperkinesis/et [Etiology]

KW - Male

KW - Mother-Child Relations

KW - Motor Activity

KW - Motor Skills

KW - Neurologic Examination

KW - Play and Playthings

KW - Prognosis

KW - Psychometrics

KW - Sex Factors

KW - Spatial Behavior

RP - NOT IN FILE

SP - 173

EP - 187

JF - Annals of the New York Academy of Sciences

JA - Ann.N.Y.Acad.Sci

VL - 205

CY - UNITED STATES

SN - 0077-8923

UR - 4511278

ER -

TY - JOUR

ID - 508

T1 - "If you ever see this video, we're probably dead"-A boy's own heterotopia (notes from an inner London playground). [References]

A1 - Richards,Chris

Y1 - 2013///

N1 - Peer Reviewed Journal: 2013-24587-007

English

Journal; Peer Reviewed Journal

KW - PsycInfo

KW - epidemiology

KW - Games

KW - Playgrounds

KW - Pretend Play

KW - Age Differences

KW - Childhood Development

KW - Elementary Schools

RP - NOT IN FILE

SP - 383

EP - 398

JF - Journal of Children and Media

VL - 7:

IS - 3

N2 - This article draws on a 2-year research project focusing on children's playground games, and their relationship to popular media, in an inner London primary school. Extensive video recording of playground events was employed in the research. In addition, the children were invited to participate in documenting their own play using video camcorders. The article examines two interrelated videos made by one 11-year-old boy. Together, they provide one example of pretend play scenarios rendering the "safe" playground a location for the experience of threat and danger, attack and pursuit. Play of this kind is interpreted as a form of dramatic staging of the self at risk. The analysis suggests that in constructing a narrative fantasy of risk and vulnerability the boy also explores and exercises control. Emotionally, such a "heterotopian" transformation of the playground is exciting and pleasurable. Drawing eclectically and constructively on popular media sources, the play scenario further enables him to dramatise the social relations of the playground and, in particular, to negotiate power and control between adults and children and between children of different ages. (PsycINFO Database Record (c) 2013 APA, all rights reserved) (journal abstract)

SN - 1748-2798

AD - Richards, Chris: Department of Culture, Communication and Media, Institute of Education, London, United Kingdom

ER -

TY - JOUR

ID - 509

T1 - My brother, my friend: Positive sibling relationships, peer acceptance, and internalizing problems in low-income boys

A1 - Nichols, Sara R.

Y1 - 2013///

N1 - Dissertation Abstract: 2013-99181-189

English

Dissertation Abstract

KW - PsycInfo

KW - Emotional Adjustment

KW - Internalization

KW - Peers

KW - Sibling Relations

KW - Human Males

KW - Lower Income Level

RP - NOT IN FILE

SP - No

JF - Dissertation Abstracts International: Section B: The Sciences and Engineering

VL - 74:

IS - 3-B(E)

N2 - 80% of American children grow up in a household with one or more siblings (Dunn, 2000). These relationships are known to be intense and highly affectively-charged (Dunn, 1983) and are many individuals' longest-duration relationships, extending across the lifespan farther than most friendships, marital, or parental relationships (Dunn, 1998; Sroufe et al, 2005). A growing body of work suggests that sibling relationships contribute to children's social, cognitive and emotional development, as well as to eventual psychopathology outcomes (Brody, 1998). The current study examines low-income boys' sibling play interactions at age five as a predictor of their subsequent psychological adjustment in later childhood (N = 133). In particular, positive play is examined as a marker of high-quality sibling relationships. The study makes four primary contributions to the field: 1) Identifying child and family predictors of positive sibling interaction in a high-risk sample of young children observed during regular play; 2) Finding differences in positive sibling interactions between siblings with small and large age differences, older versus younger siblings, and African-American and European-American sibling dyads; 3) Demonstrating a relationship between positive sibling interaction at five years of age and absence of psychiatric diagnoses and fewer symptoms up to seven years later in boys at risk for psychopathology; and 4) Identifying the unique contributions of positive sibling relationships, independent of family functioning and peer relationships, in buffering against the development of psychopathology in this high-risk sample. Results suggest that sibling interactions and in particular, resolution of conflict and negative affect during sibling play, are important directions for continued examination and intervention. (PsycINFO Database Record (c) 2013 APA, all rights reserved)

SN - 0419-4217

AD - Nichols, Sara R.: U Pittsburgh, US

ER -

TY - JOUR

ID - 511

T1 - Outdoor play and learning in early childhood from different cultural perspectives. [References]

A1 - Prince, Heather; Allin, Linda; Sandseter, Ellen Beate Hansen; Arlemalm-Hagser, Eva

Y1 - 2013///

N1 - Peer Reviewed Journal: 2013-28756-002

English

Journal; Peer Reviewed Journal

KW - PsycInfo

KW - Childhood Development

KW - Childhood Play Behavior

KW - Cross Cultural Differences

KW - Early Childhood Development

RP - NOT IN FILE

SP - 183

EP - 188

JF - Journal of Adventure Education and Outdoor Learning

VL - 13:

IS - 3

N2 - This editorial provides an overview of the present issue of Journal of Adventure Education and Outdoor Learning. The Journal focuses on outdoor play and learning in early childhood through a lens of cultural differences and similarities. Five articles are included in this issue and are preceded by a discussion of the contemporary challenges in this area of research. The first two papers in this issue examine the environments of play in different parts of Europe, the value placed on them and their optimization. The next paper shows how altering adults' perception of risk could enhance the sustainability of outdoor play. The next two papers focus more on the processes and outcomes that can be achieved through outdoor play. This is an important time for early childhood practitioners and researchers to re-evaluate approaches to outdoor play, and to consider the different opportunities available for outdoor play and play in natural environments in early childhood. It is hoped that this issue will make a significant contribution. (PsycINFO Database Record (c) 2013 APA, all rights reserved)

SN - 1472-9679

AD - Prince, Heather: University of Cumbria, Ambleside, United Kingdom Allin, Linda: Northumbria University, United Kingdom

ER -

TY - JOUR

ID - 512

T1 - Predicting autism from social communication skills, early play and engagement of children showing high risk for autism

A1 - Huynh,Linh Ngoc

Y1 - 2013///

N1 - Dissertation Abstract: 2013-99170-276

English

Dissertation Abstract

KW - PsycInfo

KW - At Risk Populations

KW - Autism

KW - Childhood Development

KW - Communication Skills

KW - Social Skills

KW - Childhood Play Behavior

RP - NOT IN FILE

SP - No

JF - Dissertation Abstracts International Section A: Humanities and Social Sciences

VL - 74:

IS - 3-A(E)

N2 - The substantial increase in the number of children with ASD has stressed the importance of early detection and identification of ASD in the research community. Forty-nine children between the ages of 15 and 30 months were identified as high risk for autism in this study. The study examined the contribution of early social communication; early play behaviors and engagement with caregivers to later language development and autism diagnosis. Joint attention skills, play skills, restricted and repetitive behaviors, and engagement with caregiver were coded in this study. The results of this study showed early deficits in initiating joint attention skills was more related to receiving a later diagnosis of autism. (PsycINFO Database Record (c) 2013 APA, all rights reserved)

SN - 0419-4209

AD - Huynh, Linh Ngoc: U California, Los Angeles, US

ER -

TY - JOUR

ID - 513

T1 - Shy toddlers' responses to an unfamiliar social setting: The effect of encouragement of independence and high warmth behaviors

A1 - Grady,Jessica Stoltzfus

Y1 - 2013///

N1 - Dissertation Abstract: 2013-99160-106

English

Dissertation Abstract

KW - PsycInfo

KW - Peers

KW - Social Anxiety

KW - Social Behavior

RP - NOT IN FILE

SP - No

JF - Dissertation Abstracts International: Section B: The Sciences and Engineering

VL - 74:

IS - 2-B(E)

N2 - Toddlers who are shy may be at risk for poor peer relations, social withdrawal, and social anxiety. A large body of literature supports that parenting behaviors may mitigate this risk, however findings are seemingly mixed regarding whether high warmth parenting and encouraging parenting facilitate or hinder children's social behaviors. The present study employed an experimental design to determine the specific influence of high

warmth maternal parenting and encouragement of independence maternal parenting on shy toddlers' approach and avoidance behaviors in a play session with unfamiliar peers. One hundred and nineteen mothers of toddlers between 21 and 27 months of age completed temperament and other questionnaires. The toddlers were classified as shy or non-shy based on mothers' responses on a social fear subscale of the temperament questionnaire. One shy and two non-shy toddlers and their mothers participated in each of a total of 32 25-minute play session, during which time shy toddlers' mothers' behaviors were manipulated and children's approach and avoidance behaviors were recorded for later coding. Results indicated that shy toddlers demonstrated less approach and more avoidance during the initial baseline of the study. However, shy toddlers did not increase their approach or decrease their avoidance following either manipulation. Exploratory analyses provide some support for the beneficial impact of encouragement of independence parenting; shy children were indistinguishable from their non-shy peers in their avoidance behaviors after the encouragement of independence intervention, but not after the high warmth intervention. Despite the limited findings in the present study, the broader literature base suggests that the maternal high warmth and encouragement of independence behaviors that were the focus of the present study have the potential to teach shy toddlers to approach instead of avoid social novelty and merit further study. (PsycINFO Database Record (c) 2013 APA, all rights reserved)

SN - 0419-4217

AD - Grady, Jessica Stoltzfus: West Virginia U., US

ER -

TY - JOUR

ID - 514

T1 - Identification of early behavioral markers of anxiety and social withdrawal in preschool children

A1 - Ale,Chelsea M.

Y1 - 2013///

N1 - Dissertation Abstract: 2013-99161-106

English

Dissertation Abstract

KW - PsycInfo

KW - Behavioral Sciences

KW - Preschool Students

KW - Social Anxiety

KW - Withdrawal (Defense Mechanism)

KW - Social Skills

RP - NOT IN FILE

SP - No

JF - Dissertation Abstracts International: Section B: The Sciences and Engineering

VL - 74:

IS - 2-B(E)

N2 - This study examined an observational method for identifying specific behaviors to indicate social anxiety and social withdrawal in preschool children. During an interaction task with a novel adult, 28 children (ages 4 and 5) were observed for specific verbal and non-verbal behaviors (i.e., total utterances, commands, questions, unsolicited conversation, direct responses, eye gaze aversion, non-verbal response, physical distancing, freezing, smiling ) and global behaviors (i.e., shyness, volume or speech, and postural rigidity), theoretically relevant to early childhood social anxiety. Behaviors observed during the interaction task were examined in relation to the parent-reported Spence Preschool Anxiety Scale's social anxiety subscale (Spence, Rapee, Edwards, & Ingram, 2001) and the percentage of solitary behavior observed during unstructured play at preschool (Morris, Messer, & Gross, 1995). Four years later, participants were re-contacted and 15 parents and children completed the Social Phobia and Anxiety Inventory for Children, Parent Report (P-SPAIC; Beidel, Turner, Hamlin, & Morris, 2000), the Child Behavior Checklist Social Competence Subscale (CBCL, Social Competence; Achenbach, 1991), and the Social Phobia and Anxiety Inventory for Children, Item 10 self-report (SPAIC-10, T. Morris, personal communication). Preliminary analyses revealed that the specific verbal and non-verbal behaviors (with the exception of physical distancing and commands) were significantly correlated with the global behaviors. The global behaviors did not predict a significant amount of variance in solitary behavior during unstructured play. None of the specific verbal or non-verbal behaviors were significantly related to solitary behavior during unstructured play or the Spence Preschool Anxiety Scale's social anxiety subscale. Although solitary behavior during unstructured play and the Spence Preschool Anxiety Scale's social anxiety subscale were significantly



related, neither one was significantly differentially related to any of the specific verbal or non-verbal behaviors observed during the interaction task. Unsolicited conversation and direct responses were significantly related to CBCL Social Competence at follow-up. Although a significant difference was not detected, a large effect was seen for total utterances, commands, and non-verbal responses to direct questions for those children who were elevated on one or more of the follow-up measures compared to children who were not elevated on any follow-up measure. Although limited by a lack of adequate statistical power and a restricted range of social anxiety at baseline, the study has important implications for the identification of specific behaviors in preschool that may be risk-factors for social anxiety childhood. (PsycINFO Database Record (c) 2013 APA, all rights reserved)

SN - 0419-4217

AD - Ale, Chelsea M.: West Virginia U., US

ER -

TY - JOUR

ID - 515

T1 - Is father-child rough-and-tumble play associated with attachment or activation relationships? [References]

A1 - Paquette, Daniel

Y1 - 2013///

N1 - Peer Reviewed Journal: 2013-18617-003

English

Journal; Peer Reviewed Journal

KW - PsycInfo

KW - Attachment Behavior

KW - Childhood Play Behavior

KW - Competition

KW - Father Child Relations

RP - NOT IN FILE

SP - 760

EP - 773

JF - Early Child Development and Care

VL - 183:

IS - 6

N2 - The activation relationship theory, primarily focused on parental stimulation of risk-taking along with parental control during exploration, predicts that boys will be activated more than girls by their fathers. This theory may explain why fathers engage in rough-and-tumble play (RTP) with children more frequently than mothers, especially with boys. Thus, the main objective of this study is to verify the existence of a positive association between the father-son activation relationship and the frequency of father-son RTP. Given that RTP is thought to encourage the development of competition skills, it was anticipated that no association would be found between the father-child attachment relationship and the frequency of father-child RTP. The Strange Situation (SS) and Risky Situation procedures were conducted with 58 father-child dyads (22 boys and 36 girls) during toddlerhood to evaluate the attachment relationship and the activation relationship, respectively. The fathers completed a play questionnaire when children were three years old to assess RTP. Results show that the more optimally activated boys are by their fathers in toddlerhood, the more they engage in RTP with them at the age of three years. As it was anticipated, there is no association between the father-child attachment relationship in toddlerhood and the frequency of father-child RTP in the preschool period. In addition, the tendency of avoidant children to engage in more RTP with their fathers supports the hypothesis that the SS evaluates something different when used with father-child dyads instead of mother-child dyads. (PsycINFO Database Record (c) 2013 APA, all rights reserved) (journal abstract)

SN - 0300-4430

AD - Paquette, Daniel: Ecole de Psychoeducation, Universite de Montreal, Montreal, PQ, Canada Dumont, Caroline: Departement de Psychologie, Universite de Montreal, Montreal, PQ, Canada

ER -

TY - JOUR

ID - 516

T1 - Developmental coordination disorder and internalizing problems in children: The environmental stress hypothesis elaborated. [References]

A1 - Cairney,John; Rigoli,Daniela; Piek,Jan

Y1 - 2013///

N1 - Peer Reviewed Journal: 2013-28507-001

English

Journal; Peer Reviewed Journal

KW - PsycInfo

KW - Environmental Stress

KW - Internalization

KW - Motor Coordination

KW - Dyspraxia

KW - Anxiety

KW - Mental Health

RP - NOT IN FILE

SP - 224

EP - 238

JF - Developmental Review

VL - 33:

IS - 3

N2 - There is a growing literature connecting poor motor coordination to physical and mental health outcomes in children and adolescents. These studies suggest that children with disorders such as developmental coordination disorder (DCD) are at greater risk for depression and anxiety, as well as obesity, and poor physical fitness. With regard to internalizing problems (symptoms of depression and anxiety), there is also evidence to suggest that the environment may play an important role in the etiology of psychological distress in this population. Cairney, Veldhuizen, & Szatmari, 2010 used the phrase "environmental stress hypothesis" to highlight the role that negative exposure to personal and interpersonal stressors might play in accounting for higher rates of internalizing symptoms in children with DCD. In this paper, we elaborate further on this basic premise, offering a model linking DCD to internalizing problems based on Pearlin's stress process framework. In addition to stressors (risk) and protective factors, we incorporate both physical activity and obesity into our stress model. Next, we review the existing literature to see if there is evidence supporting specific components (pathways) of the model. In doing so, areas in need of further research are identified. Implications for intervention are also provided. (PsycINFO Database Record (c) 2013 APA, all rights reserved) (journal abstract)

SN - 0273-2297

AD - Cairney, John: Department of Family Medicine, McMaster University, Hamilton, ON, Canada Rigoli, Daniela: School of Psychology and Speech Pathology, Curtin Health Innovation Research Institute (CHIRI), Curtin University, Perth, WAU, Australia Piek, Jan: School of Psychology and Speech Pathology, Curtin Health Innovation Research Institute (CHIRI), Curtin University, Perth, WAU, Australia

ER -

TY - JOUR

ID - 517

T1 - Examining the etiology of depression in adolescents: Exploring cognitive and intrapersonal vulnerability models

A1 - McWhinnie,Chad M.

Y1 - 2013///

N1 - Dissertation Abstract: 2013-99140-172

English

Dissertation Abstract

KW - PsycInfo

KW - Adolescent Psychiatry

KW - Cognitive Processes

KW - Etiology

KW - Major Depression

KW - Mental Health

RP - NOT IN FILE

SP - No

JF - Dissertation Abstracts International: Section B: The Sciences and Engineering

VL - 74:

IS - 1-B(E)

N2 - Recent epidemiological studies suggest that the rates of depressive disorders are increasing among Chinese adolescents, and are now comparable to Western samples of adolescents. An estimated 16-26 million of Mainland Chinese children and adolescents suffer from depression, prompting increased public concern. As societal and cultural changes play a profound role in the development of mental health problems in adolescence, researchers have recently begun to examine how such changes have influenced the etiology of depression amongst Chinese adolescents. However, given profound cultural, social, political, and economic differences, Western theoretical models of depression cannot automatically be extended to Chinese adolescents. At the same time, there are several reasons why Western theoretical models of depression may be relevant to Chinese youth, including: (1) an influx of individualistic values may challenge long-standing collectivistic values; (2) similar epidemiological increases in the prevalence of depression among adolescents have occurred across cultures; and (3) Chinese adolescents experience similar stressors to those of Western adolescents. The purpose of the dissertation is to examine vulnerability factors to depression among Chinese adolescents within a stress generation framework using a multi-wave longitudinal design. The research described in Chapter 2 investigates the role that autonomy and stress play in the development of depressive symptoms. More specifically, the research examines whether dependent interpersonal stressors mediate the relationship between lower levels of perceived choice in one's actions or awareness of oneself, and subsequent increases in depressive symptoms. Additionally, we examine model specificity to better discriminate etiological risk factors for depression and anxiety, and the results of hierarchical linear modeling indicate that the relationship between lower levels of self-awareness and higher levels of depressive symptoms is mediated by a greater occurrence of dependent, but not independent, interpersonal stress. The results also indicate non-specificity. Overall, findings suggest that lack of autonomy in Chinese adolescents generates stress, and increases one's vulnerability to develop depressive and anxious symptoms. The research described in Chapter 3 examines underlying mechanisms that mediate the prospective relationship between self-concept clarity, stress, and depressive symptoms. Main effect analyses indicate that lower self-concept clarity predicted higher levels of depressive symptoms over time. Further, multilevel analyses reveal that stress mediates the relationship between self-concept clarity and subsequent depressive symptoms. At the same time, gender analyses indicate that the mediation effect may be driven by boys as opposed to girls indicating that there may be other pathways that contribute to depression among adolescent girls. The research presented in the current dissertation has important implications. Results from Chapters 2 and 3 suggest the etiological models developed in Western contexts may be relevant to understanding psychopathology among Chinese youth. Such insight may, ultimately, provide insight about which vulnerability factors to target when developing prevention, intervention, and treatment programs for adolescents in mainland China. (PsycINFO Database Record (c) 2013 APA, all rights reserved)

SN - 0419-4217

AD - McWhinnie, Chad M.: McGill U., Canada

ER -

TY - JOUR

ID - 518

T1 - An auditory-perceptual intervention program for fricatives: Effects and implications for toddlers without fricatives

A1 - Bandaranayake, Dakshika W.

Y1 - 2013///

N1 - Dissertation Abstract: 2013-99120-104

English

Dissertation Abstract

KW - PsycInfo

KW - Age Differences

KW - Childhood Development

KW - Intervention

KW - Program Development

KW - Auditory Perception

RP - NOT IN FILE

SP - No

JF - Dissertation Abstracts International: Section B: The Sciences and Engineering

VL - 73:

IS - 12-B(E)

N2 - Purpose. Fricatives are a class of sounds that is considered difficult to produce, and are generally developed later than stops, nasals and glides in speech sound development. Current understanding of fricative development suggests that children who develop fricatives at an early age may have better expressive language skills than children who do not develop fricatives early. The purpose of this study was to investigate the changes in fricative production, overall consonant production, and vocabulary growth in a group of toddlers who participated in a short-term, intensive auditory-perceptual intervention program. Methods. The study sample consisted of eight typically developing 18-month-old toddlers with half (n=4) in the treatment group and half (n=4) on the control group. Each toddler in both groups was visited 3 days a week for a period of 3 weeks. During each visit, a 15-minute session with a book-reading activity with a specially designed book and a play activity using selected toys and a play-script was conducted. The treatment group toddlers participated in an auditory-perceptual intervention with the book and the script designed to provide stimulation for the sounds /s/ and /z/. The control group toddlers participated in similar activities, however with materials designed to avoid stimulation of /s/ and /z/ sounds. Children's performance was assessed with speech samples and the vocabulary scores obtained at pre-treatment, post-treatment, and when the child reached 20 months of age (follow-up). A speech sample was also collected from each child before every treatment session. The assessment data were statistically analyzed to look at the differences in speech sound production and vocabulary over time for both groups of toddlers. Results. The number of fricative /s/ and /z/ productions, number of fricatives, number of fricative types, percentage of fricative types and vocabulary raw scores significantly changed over time for toddlers of both groups combined from pre-treatment to post-treatment and/or follow-up sessions. No significant group effects or interactions between group and time were found for any of the outcome measures. Individual data revealed that 7/8 participants produced fricatives and all 8 of the toddlers increased their vocabulary raw scores from pre-treatment to post-treatment and/or follow-up session. Conclusions. All toddlers enrolled in the intervention completed the intervention as planned. Fricative production and overall vocabulary changed over the study period of 2 months (between 18-20 months) for toddlers of both groups, regardless of stimulated for fricatives or not. There is no evidence from this study that targeting fricatives using an auditory-perceptual method was helpful in phonological and vocabulary development. The lack of differences between the groups suggests that general language stimulation rather than specific fricative stimulation may result in the development of fricatives. Hence, early intervention programs with more general rather than specific stimulation may be appropriate and beneficial for toddlers identified with or at-risk for speech and language delay. The evidence that toddlers as young as 18 months of age are able to participate in a structured intervention program suggests that such programs might be viable for children who are at risk for speech and language delay.

(PsycINFO Database Record (c) 2013 APA, all rights reserved)

SN - 0419-4217

AD - Bandaranayake, Dakshika W.: U Cincinnati, US

ER -

TY - JOUR

ID - 519

T1 - Assessing problematic video gaming using the Theory of Planned Behavior: A longitudinal study of Dutch young people. [References]

A1 - Haagsma, Maria C.

Y1 - 2013///

N1 - Peer Reviewed Journal: 2013-10061-004

English

Journal; Peer Reviewed Journal

KW - PsycInfo

KW - Adolescent Attitudes

KW - Computer Games

KW - Pathological Gambling

KW - Planned Behavior

KW - Reasoned Action

KW - Age Differences

KW - Human Sex Differences

KW - Self Control

RP - NOT IN FILE

SP - 172

EP - 185

JF - International Journal of Mental Health and Addiction

VL - 11:

IS - 2

N2 - Although excessive video gaming has been linked to a range of psychological problems in young people, there have been few systematic attempts to conceptualize problem gaming using established psychological theory. The aim of this study was to examine problematic game use (PGU) using the Theory of Planned Behavior (TPB). A two-wave, six-month longitudinal study examined relationships between core components of the TPB model, video gaming activity and problematic video-game play. Respondents were recruited from nine pre-vocational and senior vocational schools in the western region of the Netherlands. The sample consisted of 810 video game-playing adolescents and young adults (72.8 % boys) aged 12 to 22 years. The results showed that TPB predictors, including subjective norm, perceived behavioral control (PBC) and descriptive norm, explained 13 % of the variance in video gaming intention. Although TBP variables accounted for a significant amount of variance in PGU scores at baseline, the TPB model was less useful in predicting future gaming behavior and PGU. Perceived behavioral control was found to be the most important factor in predicting problem video-gaming behavior, this has some practical implications with regard to the treatment of problem video-gaming among young people. For example, assessing a client's perceived lack of control over gaming may be a simple but useful screening measure to evaluate risk of future problem play. Furthermore, treatment strategies may be aimed at helping the client to rebuild self-control. (PsycINFO Database Record (c) 2013 APA, all rights reserved) (journal abstract)

SN - 1557-1874

AD - Haagsma, Maria C.: Department of Psychology, Health & Technology, Faculty of Behavioral Sciences, University of Twente, Enschede, Netherlands King, Daniel L.: School of Psychology, University of Adelaide, Adelaide, SA, Australia Pieterse, Marcel E.: Department of Psychology, Health & Technology, Faculty of Behavioral Sciences, University of Twente, Enschede, Netherlands Peters, Oscar: Department of Media, Communication & Organization, Faculty of Behavioral Sciences, University of Twente, Enschede, Netherlands ER -

TY - JOUR

ID - 520

T1 - Wigs, disguises and child's play: Solidarity in teacher education. [References]

A1 - Heilbronn, Ruth

Y1 - 2013///

N1 - Peer Reviewed Journal: 2013-22161-004

English

Journal; Peer Reviewed Journal

KW - PsycInfo

KW - Educational Psychology

KW - Ethics

KW - Teacher Education

KW - Social Support

RP - NOT IN FILE

SP - 31

EP - 41

JF - Ethics and Education

VL - 8:

IS - 1

N2 - It is generally acknowledged that much contemporary education takes place within a dominant audit culture, in which accountability becomes a powerful driver of educational practices. In this culture, both pupils and teachers risk being configured as a means to an assessment and target-driven end: pupils are schooled within a particular paradigm of education. The article discusses some ethical issues raised by such schooling, particularly the tensions arising for teachers, and by implication, teacher educators who prepare and support teachers for work in situations where vocational aims and beliefs may be in conflict with instrumental aims. The article offers De Certeau's concept of la perruque to suggest an opening to playful engagement for human ends

in education, as a way of contending with and managing the tensions generated. I use the concept to recover an idea of solidarity for teacher educators and teachers to enable ethical teaching in difficult times. (PsycINFO Database Record (c) 2013 APA, all rights reserved) (journal abstract)

SN - 1744-9642

AD - Heilbronn, Ruth: Institute of Education, University of London, London, United Kingdom

ER -

TY - JOUR

ID - 521

T1 - Childhood sexual abuse and sexual risk-taking among men who have sex with women: The roles of alcohol, mental health symptoms, and sex motives

A1 - Schraufnagel, Trevor J.

Y1 - 2013///

N1 - Dissertation Abstract: 2013-99180-283

English

Dissertation Abstract

KW - PsycInfo

KW - Child Abuse

KW - Mental Health

KW - Sexual Abuse

KW - Sexual Risk Taking

KW - Symptoms

KW - Human Females

KW - Sexual Intercourse (Human)

KW - Sexual Partners

RP - NOT IN FILE

SP - No

JF - Dissertation Abstracts International: Section B: The Sciences and Engineering

VL - 74:

IS - 3-B(E

N2 - Several studies have suggested that those who have experienced childhood sexual abuse (CSA) are at greater risk for sexually-transmitted infections later in life than are their non-abused counterparts. For the most part, the populations investigated to date have consisted of women, men who have sex with men, and high-risk clinical or homeless populations. As such, little is known in this domain about men who have sex with women (MSW). Furthermore, even among the most frequently studied populations, research that has been devoted to identifying and examining potential mediators in the CSA - sexual risk relationship is scarce. To address these gaps, the current studies evaluated the presence and possible mediators of the CSA - sexual risk relationship among a community sample of MSW. Paper I reviews the research on CSA and sexual risk-taking that has been conducted to date among MSW and highlights the role that alcohol consumption may play as a mediator in such a relationship. Paper I goes on to present a longitudinal study that examined the effect of CSA on several later sexual risk indices and evaluates the extent to which alcohol-related variables factor into this relationship. Paper I also presents findings related to idiosyncratic CSA characteristics and how such characteristics may affect alcohol- and sexual risk-related outcomes. Paper II extends Paper I by introducing and reviewing additional, non-alcohol-related variables that may play a mediational role in the CSA - sexual risk relationship. Paper II then proceeds to present a longitudinal study that examined mood and anxiety symptoms and sex motives as mediators in the relationship between CSA and number of sexual partners. The results from these studies extend previous findings concerning the relationship between one's history of CSA and one's subsequent sexual risk-related behaviors. Furthermore, the current studies underscore the importance of ongoing research to further refine our understanding of sexual risk-taking in the wake of sexual abuse. (PsycINFO Database Record (c) 2013 APA, all rights reserved)

SN - 0419-4217

AD - Schraufnagel, Trevor J.: U Washington, US

ER -

TY - JOUR

ID - 523

T1 - The effects of alcohol advertising on college students' behaviors: Using family communication as a protective factor against heavy drinking and risky sexual behaviors

A1 - Radanielina-Hita,Marie Louise

Y1 - 2013///

N1 - Dissertation Abstract: 2013-99090-390

English

Dissertation Abstract

KW - PsycInfo

KW - Advertising

KW - Alcohols

KW - Family Relations

KW - Sexual Risk Taking

KW - Student Attitudes

KW - Alcohol Drinking Attitudes

KW - College Students

KW - Communication

KW - Decision Making

RP - NOT IN FILE

SP - No

JF - Dissertation Abstracts International Section A: Humanities and Social Sciences

VL - 73:

IS - 11-A(E)

N2 - An online survey of undergraduates explored the effects of recalled parent-child interaction regarding media on their critical thinking skills, beliefs about alcohol and sex and current reports of risky behaviors. Students completed the questionnaire three times during fall 2011. The SEM analyses were based on 676 students. The longitudinal data set was used to model a latent trajectory of drinking and risky behaviors. Students whose parents critiqued media content reported a higher level of critical thinking toward media sources and media content. More critical thinking toward media sources decreased the effects of advertising on alcohol-related expectancies. More critical thinking toward media content decreased the effects of advertising on sex-related expectancies, alcohol-related behaviors and risky sexual behaviors. Parents' mediation served as protective factor against the effects of advertising on drinking via their effects on critical thinking toward media sources and alcohol-related expectancies. Negative mediation decreased risky sexual behaviors via its prior effects on critical thinking toward media content and sex-related expectancies. On the other hand, students whose parents endorsed media portrayal reported lower levels of critical thinking. Positive mediation predicted more risky sexual behaviors. Therefore, critical thinking toward media directly and consistently affected risky behaviors. Alcohol-related expectancies were related to sex-related expectancies. At time 1, more drinking predicted more risky sexual behaviors. However, the relationship did not stand the test of time. The analyses also revealed a linear decrease of drinking from time 1 to time 3. Developing critical thinking toward media is an effective approach to helping young people make good decision about their health. Although students' understanding of advertising intent may be biased by the emotional aspect of decision making, critical thinking decreased the appeal of advertising on risky behaviors. Parents play an important role in developing their children's critical thinking skills. As the positive effect of parent-child communication influenced current behaviors, prevention programs targeting college students may still benefit from an inclusion of family communication practices. Although preliminary, the non-significant association between alcohol-related behaviors and risky sexual behaviors across time buttressed previous research, which established a more correlational nature rather than directional relationship. (PsycINFO Database Record (c) 2013 APA, all rights reserved)

SN - 0419-4209

AD - Radanielina-Hita, Marie Louise: Washington State U., US

ER -

TY - JOUR

ID - 524

T1 - Exploring individual trajectories of social communicative development in toddlers at risk for autism spectrum disorders. [References]

A1 - Dereu,Mieke; Roeyers,Herbert; Raymaekers,Ruth; Warreyn,Petra

Y1 - 2012///

N1 - Peer Reviewed Journal: 2012-13564-011

English

Journal; Peer Reviewed Journal

KW - PsycInfo

KW - Autism

KW - Communication

KW - Risk Factors

RP - NOT IN FILE

SP - 1038

EP - 1052

JF - Research in Autism Spectrum Disorders

VL - 6:

IS - 3

N2 - Whilst impairments in joint attention, imitation, and pretend play are well documented in children with autism spectrum disorder (ASD), the developmental trajectories of these symptoms remain unknown. The main objective was to explore these trajectories in a sample of children at risk for ASD between the ages of 2 and 4 years. After screening positive for ASD, 17 children were prospectively followed with 6-monthly assessments of social communicative skills and general development. During this study, 9 children were diagnosed with ASD. Results showed that there was growth in imitation skills and in pretend play ability. Also, a slightly increased amount of initiation of joint attention was noted. However, the quality of joint attention behaviours did not significantly improve and growth rates did not significantly differ between children with ASD and non-ASD cases. There was a great intra-individual variability, especially in the performances on the imitation tasks. Also interindividual variability was apparent: some children with ASD showed a delayed development of imitation or pretend play, whereas others had a more clearly deviant developmental profile. The importance of looking at individual trajectories and variability in the study of social communicative development in children with ASD is discussed. (PsycINFO Database Record (c) 2013 APA, all rights reserved) (journal abstract)

SN - 1750-9467

AD - Dereu, Mieke: Research Group Developmental Disorders, Department of Experimental Clinical and Health Psychology, Ghent University, Ghent, Belgium Roeyers, Herbert: Research Group Developmental Disorders, Department of Experimental Clinical and Health Psychology, Ghent University, Ghent, Belgium Raymaekers, Ruth: Research Group Developmental Disorders, Department of Experimental Clinical and Health Psychology, Ghent University, Ghent, Belgium Warreyn, Petra: Research Group Developmental Disorders, Department of Experimental Clinical and Health Psychology, Ghent University, Ghent, Belgium  
ER -

TY - JOUR

ID - 527

T1 - Romeo and Juliet and dramatic distancing: Chaos and anger contained for inner-city adolescents in multicultural schools. [References]

A1 - Carr, Mandy

Y1 - 2012///

N1 - Book: 2012-04044-009

English

Book; Edited Book

KW - PsycInfo

KW - Pervasive Developmental Disorders

KW - Psychodrama

KW - School Based Intervention

KW - Theatre

KW - Bullying

KW - Adolescent Development

KW - Anger

KW - Coping Behavior

KW - Education

KW - Mental Confusion



KW - Multicultural Education

KW - Parents

KW - Resilience (Psychological)

KW - Schools

KW - Urban Environments

RP - NOT IN FILE

SP - 91

EP - 97

JF - Leigh, Lauraine [Ed]; Gersch, Irvine [Ed]; Dix, Ann [Ed]; Haythorne, Deborah [Ed]

VL - :

IS - 2012

N2 - (from the chapter) Adolescence can be viewed as a time of transition from child to adulthood, where a cocktail of hormones and changes to body and mind can create anger and confusion. Although this may seem a modern problem, teenagers through the ages in different ways have shared the same fears and difficulties. In this chapter I intend to examine how *Romeo and Juliet*, Shakespeare's play about teenage love and family tensions, may be used in dramatherapy sessions to help reflect issues in the twenty-first century. I will examine how Shakespeare reaches out to troubled young people whose unexpressed anger may be impeding their educational and emotional development. Karkou (2010: 13) notes that children at risk of developing mental health problems can have their initial contact with qualified professionals in school. Difficulties can thus be identified and addressed early, without resorting to specialized services outside the school environment. This chapter aims to show the impact of the work on the resilience of young people from a variety of cultures as well as the importance of providing therapeutic interventions within a school context. Two case studies are used to demonstrate how issues in the play *Romeo and Juliet* can support teenagers in expressing and processing their anger in a therapeutic context, enabling them to develop the coping skills and emotional resilience to function and fulfil their educational potential. The first case study will explore the use of parental themes from *Romeo and Juliet* with an adolescent boy on the autistic spectrum, in a special school. The second will describe a story devised by a 12-year-old girl to process bullying issues in an inner-city secondary school, following her engagement with the theme of tension between the Montagues and Capulets. Whilst these cases are fictitious, they are based on an amalgam of young people's experiences within dramatherapy. (PsycINFO Database Record (c) 2013 APA, all rights reserved)

AD - Carr, Mandy: British Association of Dramatherapists, Equality and Diversity Sub-Committee, United Kingdom

ER -

TY - JOUR

ID - 528

T1 - Increased corticosterone in peripubertal rats leads to long-lasting alterations in social exploration and aggression. [References]

A1 - Veenit, Vandana

Y1 - 2013///

N1 - Peer Reviewed Journal: 2013-15009-001

English

Journal; Peer Reviewed Journal

KW - PsycInfo

KW - Animal Aggressive Behavior

KW - Animal Social Behavior

KW - Corticosterone

KW - Stress

KW - Rats

RP - NOT IN FILE

JF - *Frontiers in Behavioral Neuroscience*

VL - 7 Apr 2013, ArtID 26.

N2 - Stress during childhood and adolescence enhances the risk of psychopathology later in life. We have previously shown that subjecting male rats to stress during the peripubertal period induces long-lasting effects on emotion and social behaviors. As corticosterone is increased by stress and known to exert important programming effects, we reasoned that increasing corticosterone might mimic the effects of peripubertal stress.

To this end, we injected corticosterone (5mg/kg) on 7 scattered days during the peripuberty period (P28-P30, P34, P36, P40, and P42), following the same experimental schedule as for stress administration in our peripubertal paradigm. We measured play behavior in the homecage and, at adulthood, the corticosterone response to novelty and behavioral responses in tests for anxiety- and depression-like behaviors, aggression, and social exploration. As compared to vehicle, corticosterone-treated animals exhibit more aggressive play behavior during adolescence, increased aggressive behavior in a resident-intruder (RI) test while reduced juvenile exploration and corticosterone reactivity at adulthood. Whereas the corticosterone treatment mimicked alterations induced by the peripuberty stress protocol in the social domain, it did not reproduce previously observed effects of peripuberty stress on increasing anxiety-like and depression-like behaviors, respectively evaluated in the elevated plus maze (EPM) and the forced swim tests. Our findings indicate that increasing corticosterone levels during peripuberty might be instrumental to program alterations in the social domain observed following stress, whereas other factors might need to be recruited for the programming of long-term changes in emotionality. Our study opens the possibility that individual differences on the degree of glucocorticoid activation during peripuberty might be central to defining differences in vulnerability to develop psychopathological disorders coursing with alterations in the social realm. (PsycINFO Database Record (c) 2013 APA, all rights reserved) (journal abstract)

SN - 1662-5153

AD - Veenit, Vandana: Laboratory of Behavioral Genetics, School of Life Sciences, Brain Mind Institute, Ecole Polytechnique Federale de Lausanne, Lausanne, Switzerland Cordero, Maria I.: Laboratory of Behavioral Genetics, School of Life Sciences, Brain Mind Institute, Ecole Polytechnique Federale de Lausanne, Lausanne, Switzerland Tzanoulinou, Stamatina: Laboratory of Behavioral Genetics, School of Life Sciences, Brain Mind Institute, Ecole Polytechnique Federale de Lausanne, Lausanne, Switzerland Sandi, Carmen: Laboratory of Behavioral Genetics, School of Life Sciences, Brain Mind Institute, Ecole Polytechnique Federale de Lausanne, Lausanne, Switzerland

ER -

TY - JOUR

ID - 529

T1 - Cul-de-sac kids. [References]

A1 - Hochschild, Thomas R.J.

Y1 - 2013///

N1 - Peer Reviewed Journal: 2013-14643-007

English

Journal; Peer Reviewed Journal

KW - PsycInfo

KW - Childhood Development

KW - Childhood Play Development

KW - Neighborhoods

KW - Safety

KW - Social Interaction

RP - NOT IN FILE

SP - 229

EP - 243

JF - Childhood: A Global Journal of Child Research

VL - 20:

IS - 2

N2 - Previous research indicates that adults who live on cul-de-sac streets are more likely to have positive experiences with neighbors than residents of other street types (Brown and Werner, 1985; Hochschild Jr, 2011; Mayo Jr, 1979; Willmott, 1963). The present research ascertains whether street design has an impact on children's neighborhood experiences. The author interviewed 73 adults who live on cul-de-sacs and 37 adults who live on through-streets (N = 110) to determine adults' understandings of children's neighborhood experiences. The data reveal three primary benefits for children raised on cul-de-sacs. First, because cul-de-sacs tend to be territorial streets, parents are more likely to let their children play outside unattended under the watchful eyes of neighbors. These neighbors provide a social safety net for cul-de-sac children and their friends. Second, because they are aware that they are likely being watched, cul-de-sac children are less likely to partake in deviant activities while on their street. The author refers to this internalized form of self-discipline as street

panopticism. Third, the low traffic levels on cul-de-sacs create greater opportunity for uninterrupted play, thus drawing cul-de-sac kids outside for individual and group recreation. The author argues that cul-de-sacs, as well as other low-traffic streets, can enhance children's neighborhood experiences and create more vibrant neighborhoods. (PsycINFO Database Record (c) 2013 APA, all rights reserved) (journal abstract)

SN - 0907-5682

AD - Hochschild, Thomas R.: Valdosta State University, Valdosta, GA, US

ER -

TY - JOUR

ID - 530

T1 - Developmental changes in the free play and programmed play of children at risk for developmental disabilities in an early child-parent support group. [Japanese]. [References]

A1 - Saita, Yasuaki

Y1 - 2012///

N1 - Peer Reviewed Journal: 2012-23397-004

Japanese

Journal; Peer Reviewed Journal

KW - PsycInfo

KW - At Risk Populations

KW - Childhood Development

KW - Childhood Play Behavior

KW - Developmental Disabilities

KW - Parent Child Relations

RP - NOT IN FILE

SP - 31

EP - 43

JF - Japanese Journal of Special Education

VL - 50:

IS - 1

N2 - The present study examined effects of an early treatment group for parents and children through a longitudinal assessment of the children's behavior. The group's purpose was for developmental support and child-care support for parents and their children who had delays in communication skills or behavior problems. The parent-child pairs (N = 30) were assessed at the beginning and end of a 6-month period. Assessment sheets were used to record their behavior in free play and programmed play; other domains assessed included understanding skills, expression skills, activity, behavior problems, and the parent-child relationship. The mean age of the children at the first assessment was 30.9 months (SD = 8.6). Assessments of both types of play and all the domains were higher in the second assessment than in the first. Structural equation modeling (SEM) analysis revealed the following: (a) the growth in expression skills and in the relations between the parents and their children was related to the children's growth in free play and programmed play, but (b) the children's growth in understanding skills was related only to their growth in free play. It was concluded that important skills for the two types of play are different. These findings and other findings from follow-up done after the group and case studies suggest that early group activities can be useful for assessment and early treatment. (PsycINFO Database Record (c) 2013 APA, all rights reserved) (journal abstract)

SN - 0387-3374

AD - Saita, Yasuaki: Faculty of Humanities, University of Kitakyushu, Kitakyushu-Shi, Japan

ER -

TY - JOUR

ID - 531

T1 - Adhd symptoms and risk for alcohol use and cigarette smoking among college students: What role do social-cognitive factors play?

A1 - Glass, Kerrie

Y1 - 2013///

N1 - Dissertation Abstract: 2013-99060-295

English

Dissertation Abstract

KW - PsycInfo

KW - Alcohols

KW - Attention Deficit Disorder with Hyperactivity

KW - Risk Factors

KW - Tobacco Smoking

KW - Social Cognition

RP - NOT IN FILE

SP - No

JF - Dissertation Abstracts International: Section B: The Sciences and Engineering

VL - 73:

IS - 9-B(E

N2 - Attention-deficit/hyperactivity disorder (ADHD) is a common childhood disorder which often persists into adulthood and has been associated with an increased risk for substance use. Although more college students with high levels of ADHD symptoms are attending college, little research has examined whether ADHD symptoms are associated with substance use or whether social and cognitive factors help to explain whether ADHD symptoms are linked to this increased substance use risk. The aims of the current study were: (1) To examine whether ADHD symptoms were associated with increasing trajectories of cigarette smoking, alcohol use, and alcohol-related problems among first-year college students, and (2) To examine whether constructs related to Social Cognitive Theory-perceived social norms, positive outcome expectancies, or self-efficacy-mediated the proposed relation between ADHD symptoms and cigarette smoking, alcohol use, and alcohol-related problems trajectories. It was hypothesized that greater ADHD symptomatology would be related to increasing levels of cigarette smoking, alcohol use, and alcohol problems during the study. Further, it was hypothesized that perceived social norms, positive outcome expectancies, and self-efficacy would partially mediate these relations. Participants were 449 college freshmen who completed three online surveys during their first year of college. Hypotheses were largely unsupported, but results suggested that ADHD symptoms were positively associated with baseline alcohol problems after controlling for conduct disorder (CD) symptoms. ADHD was not significantly associated with changes in any of the substance use trajectories, and there was no evidence for the proposed social cognitive factors mediating the relation between ADHD and changes in substance use. Possible reasons for the null findings are discussed. Future directions and clinical implications are also presented. (PsycINFO Database Record (c) 2013 APA, all rights reserved)

SN - 0419-4217

AD - Glass, Kerrie: U South Carolina, US

ER -

TY - JOUR

ID - 533

T1 - Temperament and risk: Resilient and vulnerable responses to adversity. [References]

A1 - Lengua, Lilianna J.

Y1 - 2012///

N1 - Book: 2012-22484-025

English

Book; Edited Book

KW - PsycInfo

KW - Personality

KW - Resilience (Psychological)

KW - Risk Factors

KW - Stress Reactions

KW - Childhood Development

KW - Individual Differences

RP - NOT IN FILE

SP - 519

EP - 540

JF - Zentner, Marcel [Ed]; Shiner, Rebecca L [Ed]

VL - :

IS - 2012

N2 - (from the chapter) In a bioecological model it is posited that individuals develop within multiple contexts, and that development is affected by transactions and interactions of factors at many levels, including distal and proximal influences (Bronfenbrenner & Morris, 1998). Distal factors, such as cultural-, socioeconomic-, and community-level influences provide the contexts in which proximal factors, such as family relationships and parenting, influence individual development. Risk factors present at these varying contextual levels can result in children developing cognitive, social-emotional or behavioral problems. However, individual-level factors also play a critical role, both directly by contributing to developmental outcomes, and indirectly by filtering or altering the impact of contextual risk on development. One essential individual difference factor is temperament, which is a key contributor to children's vulnerable or resilient responses to the experience of adversity or risk. The conceptual model shown in Figure 25.1, on which this chapter is based, posits that risk and promotive factors shape the biological underpinnings and behavioral manifestations of temperament. In turn, temperament influences the degree to which a child is exposed to risk and promotive factors in a bioecological model it is posited that individuals develop within multiple contexts, and that development is affected by transactions and interactions of factors at many levels, including distal and proximal influences (Bronfenbrenner & Morris, 1998). Distal factors, such as cultural-, socioeconomic-, and community-level influences provide the contexts in which proximal factors, such as family relationships and parenting, influence individual development. Risk factors present at these varying contextual levels can result in children developing cognitive, social-emotional or behavioral problems. However, individual-level factors also play a critical role, both directly by contributing to developmental outcomes, and indirectly by filtering or altering the impact of contextual risk on development. One essential individual difference factor is temperament, which is a key contributor to children's vulnerable or resilient responses to the experience of adversity or risk. The conceptual model shown in Figure 25.1, on which this chapter is based, posits that risk and promotive factors shape the biological underpinnings and behavioral manifestations of temperament. In turn, temperament influences the degree to which a child is exposed to risk and promotive factors, and contributes to the likelihood of children developing problems. Temperament also moderates experiences of adversity or risk. This chapter first provides a brief overview of the conceptual frameworks of risk, resilience, and temperament employed in our discussion. We then present evidence for risk and promotive factors shaping temperament, the role of temperament in influencing exposure to risk and promotive factors, and the moderating effects of temperament on experiences of adversity or risk. (PsycINFO Database Record (c) 2013 APA, all rights reserved)

AD - Lengua, Liliana J.: Department of Psychology, University of Washington, Seattle, WA, US  
 Wachs, Theodore D.: Department of Psychological Sciences, Purdue University, West Lafayette, IN, US

ER -

TY - JOUR

ID - 534

T1 - Facilitating prosocial behavior in at-risk children through cooperative media-based play with peers

A1 - Lichtenberg, Jesse D.

Y1 - 2013///

N1 - Dissertation Abstract: 2013-99020-138

English

Dissertation Abstract

KW - PsycInfo

KW - Peers

KW - Prosocial Behavior

KW - Recreation

KW - Media Exposure

KW - At Risk Populations

RP - NOT IN FILE

SP - No

JF - Dissertation Abstracts International: Section B: The Sciences and Engineering

VL - 73:

IS - 7-B(E

N2 - The study sought to combine the benefits of both the play of children and the use of interactive media in an effort to increase comradery and prosocial behavior between pairs of participants composed of typically developing students and those deemed at-risk concerning social development. Over the course of a four-week intervention emphasizing cooperative video game play, an increased presence of effective, appropriate social

interaction within participant pairs was observed in addition to a pattern regarding devotion to certain recess activities by those participants observed on multiple occasions. Considerations regarding study results, methodology, and resources are discussed. (PsycINFO Database Record (c) 2013 APA, all rights reserved)

SN - 0419-4217

AD - Lichtenberg, Jesse D.: U Nebraska at Omaha, US

ER -

TY - JOUR

ID - 535

T1 - A hop, skip, and a jump: A case study examining playground safety practices and policies within a mid-size school district

A1 - Thorsen,Lisa

Y1 - 2013///

N1 - Dissertation Abstract: 2013-99010-368

English

Dissertation Abstract

KW - PsycInfo

KW - Playgrounds

KW - Safety

KW - Schools

KW - Best Practices

KW - Occupational Safety

KW - Health Care Policy

RP - NOT IN FILE

SP - No

JF - Dissertation Abstracts International Section A: Humanities and Social Sciences

VL - 73:

IS - 7-A(E)

N2 - Although national playground safety standards and guidelines exist, more than 200,000 children are injured on playgrounds each year seriously enough to warrant emergency medical treatment. The most frequent site for these injuries is on the school playground. This qualitative case study discusses the schools conformance to national playground safety standards and guidelines and discusses the factors that affect alignment to these standards. Limited stakeholder knowledge and accountability for playground safety, and splintered communication processes within the school create unsafe play environments for children. Through the comprehensive formulation and implementation of playground safety policy, schools can take proactive roles in keeping children safe. (PsycINFO Database Record (c) 2013 APA, all rights reserved)

SN - 0419-4209

AD - Thorsen, Lisa: Hofstra U., US

ER -

TY - JOUR

ID - 536

T1 - Observing young children's creative thinking: Engagement, involvement and persistence. [References]

A1 - Robson,Sue

Y1 - 2012///

N1 - Peer Reviewed Journal: 2012-33766-005

English

Journal; Peer Reviewed Journal

KW - PsycInfo

KW - Creativity

KW - Involvement

KW - Persistence

KW - Student Engagement

KW - Thinking

RP - NOT IN FILE

SP - 349

EP - 364

JA - International Journal of Early Years Education

VL - 20:

IS - 4

N2 - This paper looks at young children's creative thinking as inferred through observations of their activities. A total of 52 episodes of child-initiated and adult-initiated activities in 3- to 4-year-olds in an English Children's Centre were analysed using the Analysing Children's Creative Thinking (ACCT) Framework. Results showed that activities such as gardening and construction were as valuable for supporting creative thinking as ones traditionally associated with creativity, for example, music and painting. Outdoor play of all kinds and sociodramatic play were particularly effective contexts. All adults played a significant role in facilitating children's initial engagement in activities, and at supporting their speculative thinking and use of prior knowledge. Teachers were often more successful than other adults in supporting the acquisition of new knowledge. Child-initiated activities featured the highest levels of involvement, and were associated with trying out and analysing ideas, flexibility and originality, imagining and hypothesising. This was particularly evident in group or pair play. Children were also more persistent in child-initiated activities. Evidence of risk-taking behaviour was low, although more apparent in child-initiated activities than adult-initiated activities, or activities in which adults were present. (PsycINFO Database Record (c) 2013 APA, all rights reserved) (journal abstract)

SN - 0966-9760

AD - Robson, Sue: School of Education, University of Roehampton, London, United Kingdom Rowe, Victoria: School of Education, University of Roehampton, London, United Kingdom

ER -

TY - JOUR

ID - 537

T1 - Typology of dangerous games among middle and high school students: Towards a study of the psychological profiles. [French]. [References]

A1 - Bernadet,Sabrina; Purper-Ouakil,Diane; Michel,Gregory

Y1 - 2012///

N1 - Peer Reviewed Journal: 2012-31226-011

French

Journal; Peer Reviewed Journal

KW - PsycInfo

KW - Adolescent Psychopathology

KW - Childhood Play Behavior

KW - Dangerousness

KW - Games

KW - Risk Taking

KW - Aggressive Behavior

KW - Anoxia

KW - Competition

KW - Coping Behavior

KW - High School Students

KW - Middle School Students

KW - Risk Factors

RP - NOT IN FILE

SP - 654

EP - 658

JF - Annales Medico-Psychologiques

VL - 170:

IS - 9

N2 - Twelve percent of seven to 17 year-old children have been involved in a dangerous game [23]. Nowadays, it distinguishes non-oxygenation games, aggression games and challenge games. Often mixed together, they are part of the broad spectrum of risk taking behaviors. The objective of this research is to identify psychological factors associated with each type of dangerous games. A multisource assessment (832 adolescents and 416 parents) found that asphyxial games could become addictive; challenge games would be the response to a high

novelty-seeking and that aggression games could be the indicator of an emotional detachment. (PsycINFO Database Record (c) 2013 APA, all rights reserved) (journal abstract)  
SN - 0003-4487

AD - Bernadet, Sabrina: Laboratoire Psychologie Sante et Qualite de Vie, EA 4139, Universite Bordeaux-Segalen, UFR Sciences de l'Homme, Bordeaux, France Purper-Ouakil, Diane: Centre Hospitalier Universitaire Saint-Eloi, Montpellier, France Michel, Gregory: Laboratoire Psychologie Sante et Qualite de Vie, EA 4139, Universite Bordeaux-Segalen, UFR Sciences de l'Homme, Bordeaux, France  
ER -

TY - JOUR

ID - 538

T1 - Using a play intervention to improve the play skills of children with a language delay. [References]

A1 - Sualy,Abbey; Yount,Sara; Kelly-Vance,Lisa; Ryalls,Brigette

Y1 - 2011///

N1 - Peer Reviewed Journal: 2012-03151-006

English

Journal; Peer Reviewed Journal

KW - PsycInfo

KW - At Risk Populations

KW - Childhood Development

KW - Childhood Play Behavior

KW - Language Disorders

KW - Social Skills

KW - Language Delay

RP - NOT IN FILE

SP - 105

EP - 122

JF - International Journal of Psychology: A Biopsychosocial Approach / Tarptautinis psichologijos zurnalas: Biopsichosocialinis poziuris

VL - 9 2011, pp. 105-122.

N2 - Background: Children with language delays are at risk for difficulty with social skills because their play skill repertoire may be limited. Early interventions can help students learn play skills and prevent future social difficulties. Purpose: Minimal studies have addressed the impact of a play intervention, but the few that exist have found positive effects on typically developing and at-risk children. The effect of a play intervention on the play skills of preschool age children verified with a language delay was examined in this study because of the importance in improving play skills for this group. Materials and method: Children's free play skills were assessed using the PIECES and then they were assigned to either an intervention or comparison group. The intervention consisted of short-term facilitated play instruction from adults and took place in the early intervention classroom. A pretest posttest design was used to evaluate the effect of the intervention, also using the PIECES. Results: Five of six children in the intervention group improved their play skills while the five children in the comparison group remained at or below their pretest levels. Conclusions: The children's play increased in complexity by moving from exploratory to complex pretend play. Prompting, modeling and reinforcement are methods which effectively encourage play skill development. (PsycINFO Database Record (c) 2013 APA, all rights reserved) (journal abstract)

SN - 1941-7233

AD - Sualy, Abbey: University of Nebraska at Omaha, Omaha, NE, US Yount, Sara: University of Nebraska at Omaha, Omaha, NE, US Kelly-Vance, Lisa: University of Nebraska at Omaha, Omaha, NE, US Ryalls, Brigitte: University of Nebraska at Omaha, Omaha, NE, US

ER -

TY - JOUR

ID - 539

T1 - Association of maternal scaffolding to maternal education and cognition in toddlers born preterm and full term. [References]

A1 - Lowe,Jean R.

Y1 - 2013///



N1 - Peer Reviewed Journal: 2012-33680-015

English

Journal; Peer Reviewed Journal

KW - PsycInfo

KW - At Risk Populations

KW - Educational Attainment Level

KW - Parental Characteristics

KW - Premature Birth

KW - Scaffolding

KW - Cognitive Development

KW - Neonatal Development

RP - NOT IN FILE

SP - 72

EP - 77

JF - Acta Paediatrica

JA - Acta Paediatr

VL - 102:

IS - 1

N2 - Aim: Parental behaviour described as 'scaffolding' has been shown to influence outcomes in at-risk children. The purpose of this study was to compare maternal verbal scaffolding in toddlers born preterm and full term. Methods: The scaffolding behaviour of mothers of toddlers born preterm and healthy full term was compared during a 5-min videotaped free play session with standardized toys. We compared two types of scaffolding and their associations with socio-demographic, neonatal medical factors and cognition. Results: The mothers of toddlers born full term used more complex scaffolding. Maternal education was associated with complex scaffolding scores for the preterm children only. Specifically, the preterm children who were sicker in the neonatal period, and whose mothers had higher education, used more complex scaffolding. In addition, children born preterm, who had less days of ventilation, had higher cognitive scores when their mothers used more complex scaffolding. Similarly, cognitive and scaffolding scores were higher for children born full term. Conclusion: Our findings highlight early differences in mother-child interactive styles of toddlers born preterm compared with full term. Teaching parents play methods that support early problem-solving skills may support a child's method of exploration and simultaneously their language development. (PsycINFO Database Record (c) 2013 APA, all rights reserved) (journal abstract)

SN - 0803-5253

AD - Lowe, Jean R.: School of Medicine, University of New Mexico, Albuquerque, NM, US Erickson, Sarah J.: Department of Psychology, University of New Mexico, Albuquerque, NM, US MacLean, Peggy: School of Medicine, University of New Mexico, Albuquerque, NM, US Schrader, Ron: Clinical and Translational Science Center, University of New Mexico, Albuquerque, NM, US Fuller, Janell: School of Medicine, University of New Mexico, Albuquerque, NM, US

ER -

TY - JOUR

ID - 540

T1 - Head start early mental health intervention: Effects of child-centered play therapy on disruptive behaviors.

[References]

A1 - Bratton, Sue C.

Y1 - 2013///

N1 - Peer Reviewed Journal: 2012-32334-001

English

Journal; Peer Reviewed Journal

KW - PsycInfo

KW - Behavior Problems

KW - Client Centered Therapy

KW - Play Therapy

KW - Project Head Start

KW - Intervention

KW - Mental Health

KW - Preschool Students

RP - NOT IN FILE

SP - 28

EP - 42

JF - International Journal of Play Therapy

VL - 22:

IS - 1

N2 - This pilot study examined the effectiveness of child-centered play therapy (CCPT) with 54 low income preschool children (42% African American, 39% Hispanic, and 18% Caucasian) identified with clinical levels of disruptive behaviors. Children were assigned to the experimental treatment, CCPT, or to the active control, reading mentoring (RM), through block randomization. Results from a 2 (group) x 3 (measures) split plot analysis of variance indicated that according to teachers blinded to children's treatment group assignment, experimental group children demonstrated a statistically significant decrease ( $p < .05$ ) in disruptive behaviors compared with the RM group across 3 points of measurement. Post hoc analysis showed that children receiving CCPT demonstrated statistically significant decreases ( $p < .025$ ) in aggression and attention problems.

Regarding practical significance of the findings, CCPT demonstrated large  $p^2$  treatment effects ranging from .17 to .34. Of the 27 children receiving CCPT, 21 children moved from clinical levels of behavioral concern at pretest to more normative levels of functioning following treatment, thus establishing the clinical significance of CCPT as an early mental health intervention for at-risk children in Head Start. (PsycINFO Database Record (c) 2013 APA, all rights reserved) (journal abstract)

SN - 1555-6824

AD - Bratton, Sue C.: Department of Counseling and Higher Education, University of North Texas, Denton, TX, US Ceballos, Peggy L.: Department of Counseling, University of North Carolina at Charlotte, Charlotte, NC, US Sheely-Moore, Angela I.: Department of Counseling and Educational Leadership, Montclair State University, Upper Montclair, NJ, US Meany-Walen, Kristin: Clinical Mental Health and School Counseling Program, University of Northern Iowa, Cedar Falls, IA, US Pronchenko, Yulia: Department of Counseling and Higher Education, University of North Texas, Denton, TX, US Jones, Leslie D.: Department of Counseling and Higher Education, University of North Texas, Denton, TX, US

ER -

TY - JOUR

ID - 542

T1 - New reference values must be established for the Alberta Infant Motor Scales for accurate identification of infants at risk for motor developmental delay in Flanders

A1 - De Keghel, A.

Y1 - 2013///

N1 - Peer Reviewed Journal: 2013-02675-014

English

Journal; Peer Reviewed Journal

KW - PsycInfo

KW - At Risk Populations

KW - Infant Development

KW - Motor Development

KW - Test Construction

KW - Test Validity

RP - NOT IN FILE

SP - 260

EP - 267

JF - Child: Care, Health and Development

VL - 39:

IS - 2

N2 - Background: The Alberta Infant Motor Scales (AIMS) is a reliable and valid assessment tool to evaluate the motor performance from birth to independent walking. This study aimed to determine whether the Canadian reference values on the AIMS from 1990-1992 are still useful to Flemish infants, assessed in 2007-2010.

Additionally, the association between motor performance and sleep and play positioning will be determined.

Methods: A total of 270 Flemish infants between 0 and 18 months, recruited by formal day care services, were

assessed with the AIMS by four trained physiotherapists. Information about sleep and play positioning was collected by mean of a questionnaire. Results: Flemish infants perform significantly lower on the AIMS compared with the reference values ( $P < 0.001$ ). Especially, infants from the age groups of 4, 5, 6, 7, 8, 9, 10, 11, 12, 13 and of 15 months showed significantly lower scores. From the information collected by parental questionnaires, the lower motor scores seem to be related to the sleep position, the amount of play time in prone, in supine and in a sitting device. Infants who are exposed often to frequently to prone while awake showed a significant higher motor performance than infants who are exposed less to prone ( $<6$  m:  $P = 0.002$ ;  $>6$  m:  $P = 0.013$ ). Infants who are placed often to frequently in a sitting device in the first 6 months of life ( $P = 0.010$ ) and in supine after 6 months ( $P = 0.001$ ) performed significantly lower than those who are placed less in it. Conclusion: Flemish infants recruited by formal day care services, show significantly lower motor scores than the Canadian norm population. New reference values should be established for the AIMS for accurate identification of infants at risk. Prevention of sudden infant death syndrome by promoting supine sleep position should go together with promotion of tummy time when awake and avoiding to spent too much time in sitting devices when awake. (PsycINFO Database Record (c) 2013 APA, all rights reserved) (journal abstract)  
SN - 0305-1862

AD - De Kegel, A.: Department of Rehabilitation Sciences and Physiotherapy Ghent, Artevelde University College - Ghent University, Ghent, Belgium Peersman, W.: Department of Rehabilitation Sciences and Physiotherapy Ghent, Artevelde University College - Ghent University, Ghent, Belgium Onderbeke, K.: Department of Rehabilitation Sciences and Physiotherapy Ghent, Artevelde University College - Ghent University, Ghent, Belgium Baetens, T.: Department of Rehabilitation Sciences and Physiotherapy Ghent, Artevelde University College - Ghent University, Ghent, Belgium Dhooge, I.: Faculty of Medicine and Health Sciences, Department of Oto-rhino-laryngology, Ghent University, Ghent, Belgium Van Waelvelde, H.: Department of Rehabilitation Sciences and Physiotherapy Ghent, Artevelde University College - Ghent University, Ghent, Belgium  
ER -

TY - JOUR

ID - 543

T1 - Pedometers, accelerometers, and observational methods: A comparison of measurements of physical activity in fourth-grade students

A1 - Greene,Amanda

Y1 - 2012///

N1 - Dissertation Abstract: 2012-99210-063

English

Dissertation Abstract

KW - PsycInfo

KW - Exercise

KW - Methodology

KW - Observation Methods

KW - Physical Activity

KW - Schools

KW - Activity Level

KW - Grade Level

KW - Measurement

RP - NOT IN FILE

SP - 1726

JF - Dissertation Abstracts International Section A: Humanities and Social Sciences

VL - 73:

IS - 5-A

N2 - In recent years physical inactivity among students has become a matter of great concern. Nearly 65% of students do not meet the daily recommended level of physical activity, which is 60 minutes or more of moderate to vigorous physical activity each day, with 50% of that time being spent in moderate to vigorous levels of activity (CDC, 2010b). As a result, the 21 st century has shown to be a time of many health problems such as, obesity, diabetes, and heart disease. In fact, nearly one third of all children are considered obese or overweight (Slawta & DeNeui, 2009). Researchers suggest that these health problems are directly related to students' sedentary lifestyles (Pate et al., 2006). Schools play a pivotal role in addressing and increasing physical activity

during the school day. The purpose of this research study was to measure levels of physical activity in elementary students during school hours. Specifically, the study sought to discover if there were increased levels of physical activity while students were using a cross-curricular adventure playground, as compared to when they were engaged in free play or physical education class. The study also compared the different measurement types (pedometers, accelerometers, and the observational method) used to assess physical activity, to indicate which measurement types were most feasible in the elementary school setting. Schools are ideal locations for assessing levels of physical activity, as 95% of all children are enrolled in these learning institutions (National Center for Educational Statistics, 2005). The data indicate that physical education provided for the highest levels of moderate to vigorous activity, while both free play and cross-curricular activity still rendered adequate levels of physical activity. After studying the different measurement protocols (pedometers, accelerometers, and the observational method) used in this study, results suggested the pedometer to be the most feasible device to use for measuring children in these types of physical activity settings. One implication for practice was implementing cross-curricular physical activity as a supplement to other physical activities or as an addition to physical education classes in an effort to allow more time for academic instruction while having students engaged in physical activity. Another recommendation for practice was to use pedometers as a cost-effective physical activity measurement device for elementary students. (PsycINFO Database Record (c) 2013 APA, all rights reserved)

SN - 0419-4209

AD - Greene, Amanda: East Tennessee State U., US

ER -

TY - JOUR

ID - 544

T1 - Product-based television and young children's pretend play in Australia. [References]

A1 - Fletcher,Renee

Y1 - 2012///

N1 - Peer Reviewed Journal: 2012-32006-002

English

Journal; Peer Reviewed Journal

KW - PsycInfo

KW - Childhood Development

KW - Pretend Play

KW - Product Design

KW - Television

RP - NOT IN FILE

SP - 5

EP - 17

JF - Journal of Children and Media

VL - 6:

IS - 1

N2 - Product-based television refers to programming that implicitly promotes toys to children in the guise of a television show. The aim of the present study was to examine how exposure to such programs might impact on one of the most important domains of young children's development: pretend play. Thirty-six preschoolers in Australia watched 1 of 3 different types of television program (product-based with action-adventure themes; product-based with educational themes; or non-product-based) and were given a range of product-based and non-product-based toys to play with. Contrary to expectation, program type had minimal impact on the overall frequency of pretend play children engaged in. However, compared to educational product-based programs and non-product-based programs, children who watched action-adventure product-based programs exhibited significantly less acts of novel pretense and significantly more acts of imitative pretense. Findings such as this are critical to the ongoing debate surrounding the regulation of television content aimed at children. (PsycINFO Database Record (c) 2013 APA, all rights reserved) (journal abstract)

SN - 1748-2798

AD - Fletcher, Renee: University of Queensland, St Lucia, QLD, Australia

ER -

TY - JOUR

ID - 545

T1 - Evaluating the healing power of art and play: A cross-cultural investigation of psychosocial resilience in child and adolescent survivors of the 2008 Sichuan, China earthquake

A1 - Fu,Christine Yu-Heng

Y1 - 2012///

N1 - Dissertation Abstract: 2012-99200-557

English

Dissertation Abstract

KW - PsycInfo

KW - Art Therapy

KW - Cross Cultural Differences

KW - Natural Disasters

KW - Play Therapy

KW - Survivors

KW - Mental Health

KW - Resilience (Psychological)

RP - NOT IN FILE

SP - 2152

JF - Dissertation Abstracts International: Section B: The Sciences and Engineering

VL - 73:

IS - 4-B

N2 - This dissertation builds upon an evaluation that was conducted at the end of a psychosocial intervention that was implemented to improve mental health and foster resilience among child and adolescent survivors after the 2008 Sichuan, China earthquake. First, a comprehensive review was conducted of universal interventions conducted with children and adolescents after a disaster to examine theoretical and empirical findings. Of the 27 studies identified, only seven were informed by theory. Twenty-five studies demonstrated evidence that the intervention decreased distress symptoms and improved multiple functioning domains. However, the lack of theory creates a black box and presents challenges to program fidelity and replication as well as measurement of specific program component effects and cost-effectiveness. Second, exploratory factor analysis of the Connor-Davidson Resilience Scale (CD-RISC) among a sample of 2,132 students in the control group found two resilience factors termed by Chinese scholars as: Rational Thinking: logic based on socially accepted cultural norms and Self-Awareness: rooted in an interdependent view of the self in relation to others and environmental factors. Consistent with previous studies, the CD-RISC demonstrated strong construct validity and adequate internal consistency. The stability of the model was tested using confirmatory factor analysis with data from 1,988 intervention participants. Lastly, direct and indirect effects of the intervention were examined. Mean scores in CD-RISC did not differ between groups ( $p=0.67$ ). Mean Rational Thinking was marginally higher ( $p=0.05$ ) but lower for Self-Awareness ( $p=0.02$ ) intervention versus controls. Mean PTSD was lower in the intervention than controls ( $p<0.001$ ). The log odds of PTSD did not differ between groups (OR: 1.16,  $p=0.09$ ). Rational Thinking and PTSD had similar parameter estimates that were negatively related in both groups. Self-Awareness was positively related with PTSD in both groups, but was larger in the intervention. The program focused mainly on strengthening individual traits, which may have heightened perceived variability of external forces that supersede internal capacities. The relationship between Risk Exposure and PTSD was negative for the intervention group. This may be attributed to attachment relationships with intervention caregivers and peers. Findings support the need for more cross-cultural approaches to understanding resilience and adaptive outcomes. (PsycINFO Database Record (c) 2012 APA, all rights reserved)

SN - 0419-4217

AD - Fu, Christine Yu-Heng: The Johns Hopkins U., US

ER -

TY - JOUR

ID - 546

T1 - Variables associated with children's physical activity levels during recess: The A-CLASS project.

[References]

A1 - Ridgers,Nicola D.

Y1 - 2010///

N1 - Peer Reviewed Journal: 2012-32493-001

English

Journal; Peer Reviewed Journal

KW - PsycInfo

KW - Activity Level

KW - Childhood Play Behavior

KW - Health Behavior

KW - Physical Activity

KW - School Environment

KW - Playgrounds

KW - Risk Factors

RP - NOT IN FILE

JF - The International Journal of Behavioral Nutrition and Physical Activity

VL - 7 Oct 2010, ArtID 74.

N2 - Background: School recess provides a daily opportunity for children to engage in physically active behaviors. However, few studies have investigated what factors may influence children's physical activity levels in this context. Such information may be important in the development and implementation of recess interventions. The aim of this study was to investigate the association between a range of recess variables and children's sedentary, moderate and vigorous physical activity in this context. Methods: One hundred and twenty-eight children (39% boys) aged 9-10 years old from 8 elementary schools had their physical activity levels observed during school recess using the System for Observing Children's Activity and Relationships during Play (SOCARP). Playground variables data were also collected at this time. Multilevel prediction models identified variables that were significantly associated with children's sedentary, moderate and vigorous physical activity during recess. Results: Girls engaged in 13.8% more sedentary activity and 8.2% less vigorous activity than boys during recess. Children with no equipment provision during recess engaged in more sedentary activity and less moderate activity than children provided with equipment. In addition, as play space per child increased, sedentary activity decreased and vigorous activity increased. Temperature was a significant negatively associated with vigorous activity. Conclusions: Modifiable and unmodifiable factors were associated with children's sedentary, moderate and vigorous physical activity during recess. Providing portable equipment and specifying areas for activities that dominate the elementary school playground during recess may be two approaches to increase recess physical activity levels, though further research is needed to evaluate the short and long-term impact of such strategies. (PsycINFO Database Record (c) 2012 APA, all rights reserved) (journal abstract)

SN - 1479-5868

AD - Ridgers, Nicola D.: Centre for Physical Activity and Nutrition Research, Deakin University, Burwood, VIC, Australia Fairclough, Stuart J.: Faculty of Education, Community and Leisure, Liverpool John Moores University, Liverpool, United Kingdom Stratton, Gareth: Research Institute for Sport and Exercise Sciences, Liverpool John Moores University, Liverpool, United Kingdom

ER -

TY - JOUR

ID - 547

T1 - Features and amenities of school playgrounds: A direct observation study of utilization and physical activity levels outside of school time. [References]

A1 - Colabianchi, Natalie

Y1 - 2011///

N1 - Peer Reviewed Journal: 2012-32528-001

English

Journal; Peer Reviewed Journal

KW - PsycInfo

KW - Activity Level

KW - Physical Activity

KW - Playgrounds

KW - Recreation Areas

KW - School Facilities

KW - Safety

RP - NOT IN FILE

JF - The International Journal of Behavioral Nutrition and Physical Activity

VL - 8 Apr 2011, ArtID 32.

N2 - Background: A significant amount of research has examined whether park or playground availability is associated with physical activity. However, little research has examined whether specific features or amenities of parks or playgrounds, such as the number of unique types of playground equipment or the safety of the equipment is associated with utilization of the facility or physical activity levels while at the facility. There are no studies that use direct observation and a detailed park assessment to examine these associations. Methods: Twenty urban schoolyards in the Midwest, ten of which were renovated, were included in this study. Using a detailed environmental assessment tool (i.e., Environmental Assessment of Public Recreation Spaces), information on a variety of playground attributes was collected. Using direct observation (i.e., System for Observing Play and Leisure Activity in Youth), the number of adults, girls and boys attending each schoolyard and their physical activity levels were recorded. Each schoolyard was observed ten times for 90 minutes each time outside of school hours. Clustered multivariable negative binomial regressions and linear regressions were completed to examine the association between playground attributes and utilization of the schoolyard and the proportion active on the playground, respectively. Effect modification by renovation status was also examined. Results: At renovated schoolyards, the total number of play features was significantly associated with greater utilization in adults and girls; overall cleanliness was significantly associated with less utilization in girls and boys; and coverage/ shade for resting features was significantly associated with greater utilization in adults and boys. At unrenovated schoolyards, overall safety was significantly associated with greater utilization in boys. No playground attribute was associated with the proportion active on the playground after adjusting for all other significant playground attributes. Conclusions: Having a large quantity of play features and shade at renovated playgrounds were positively associated with utilization of the schoolyard. Modifying playgrounds to have these features may increase the utilization of these facilities outside of school time. Additional research should explore what features and amenities are associated with increased physical activity levels of children and adults who utilize the facilities. (PsycINFO Database Record (c) 2012 APA, all rights reserved) (journal abstract)

SN - 1479-5868

AD - Colabianchi, Natalie: Department of Epidemiology and Biostatistics, Arnold School of Public Health, University of School Carolina, Columbia, SC, US Maslow, Andrea L.: R. Stuart Dickson Institute for Health Studies, Carolinas HealthCare System, Charlotte, NC, US Swayampakala, Kamala: Department of Epidemiology and Biostatistics, Arnold School of Public Health, University of School Carolina, Columbia, SC, US

ER -

TY - JOUR

ID - 548

T1 - A multi-level examination of school programs, policies and resources associated with physical activity among elementary school youth in the PLAY-ON study. [References]

A1 - Leatherdale, Scott T.

Y1 - 2010///

N1 - Peer Reviewed Journal: 2012-31438-001

English

Journal; Peer Reviewed Journal

KW - PsycInfo

KW - Elementary School Students

KW - Physical Activity

KW - Policy Making

KW - School Based Intervention

KW - School Environment

RP - NOT IN FILE

JF - The International Journal of Behavioral Nutrition and Physical Activity

VL - 7 Jan 2010, ArtID 6.

N2 - Background: Given the decline in physical activity (PA) levels among youth populations it is vital to understand the factors that are associated with PA in order to inform the development of new prevention programs. Many studies have examined individual characteristics associated with PA among youth yet few have studied the relationship between the school environment and PA despite knowing that there is variability in

student PA levels across schools. Methods: Using multi-level logistic regression analyses we explored the school- and student-level characteristics associated with PA using data from 2,379 grade 5 to 8 students attending 30 elementary schools in Ontario, Canada as part of the PLAY-Ontario study. Results: Findings indicate that there was significant between-school random variation for being moderately and highly active; school-level differences accounted for 4.8% of the variability in the odds of being moderately active and 7.3% of the variability in the odds of being highly active. Students were more likely to be moderately active if they attended a school that used PA as a reward and not as discipline, and students were more likely to be highly active if they attended a school with established community partnerships. Important student characteristics included screen time sedentary behavior, participating in team sports, and having active friends. Conclusion: Future research should evaluate if the optimal population level impact for school-based PA promotion programming might be achieved most economically if intervention selectively targeted the schools that are putting students at the greatest risk for inactivity. (PsycINFO Database Record (c) 2012 APA, all rights reserved) (journal abstract)

SN - 1479-5868

AD - Leatherdale, Scott T.: Department of Population Studies and Surveillance, Cancer Care, Ontario, Toronto, ON, Canada Manske, Steve: Propel Centre for Population Health Impact, Canadian Cancer Society and the University of Waterloo, Waterloo, ON, Canada Faulkner, Guy: Faculty of Physical Education and Health, University of Toronto, Toronto, ON, Canada Arbour, Kelly: Faculty of Physical Education and Health, University of Toronto, Toronto, ON, Canada Bredin, Chad: Propel Centre for Population Health Impact, Canadian Cancer Society and the University of Waterloo, Waterloo, ON, Canada

ER -

TY - JOUR

ID - 549

T1 - Time spent playing outdoors after school and its relationship with independent mobility: A cross-sectional survey of children aged 10-12 years in Sydney, Australia. [References]

A1 - Wen, Li Ming; Kite, James; Merom, Dafna; Rissel, Chris

Y1 - 2009///

N1 - Peer Reviewed Journal: 2012-30462-001

English

Journal; Peer Reviewed Journal

KW - PsycInfo

KW - Childhood Play Behavior

KW - Health

KW - Leisure Time

KW - Physical Activity

KW - Physical Mobility

KW - At Risk Populations

KW - Obesity

KW - Prevention

RP - NOT IN FILE

JF - The International Journal of Behavioral Nutrition and Physical Activity

VL - 6 Mar 2009, ArtID 15.

N2 - Background: Time spent outdoors is positively associated with physical activity and has been suggested as a proxy for physical activity of children. The role of children's independence in physical activity and time spent outdoors is less understood. This study aimed to assess how much time children spent playing outdoors after school, and to explore the relationship between outdoor play and independence among children aged 10-12 years. Method: Children recorded how much time they spent playing outdoors or watching TV/videos or playing computer games after school using a five-day diary, and also reported whether they were allowed to walk on their own in their neighbourhood as an indicator of their independent mobility. Parents were surveyed on family demographics and perception of neighbourhood safety. The surveys were conducted in late 2006 as part of the Central Sydney Walk to School program which involved 1975 children and their parents from 24 primary schools. Factors associated with time spent playing outdoors were determined by logistic regression modelling. Results: Thirty-seven per cent of children spent less than half an hour a day playing outdoors after school, and 43% spent more than 2 hours a day watching TV, videos or playing computer games. Forty-eight per cent of children were allowed to walk on their own near where they lived. Children's independent mobility was



significantly associated with outdoor play after adjusting for other confounders. Compared with those who were never allowed to walk on their own near where they lived, students who were allowed to walk on their own were significantly more likely to spend more than half an hour a day playing outdoors after school with an adjusted odds ratio of 2.6, 95% CI 1.84-3.58,  $P < 0.001$ . Conclusion: The findings that a significant proportion of children spend less than half an hour a day playing outdoors after school and have excessive screen time have important implications for physical activity promotion and obesity prevention. The study also suggests that children's independent mobility should be considered in research and evaluation into children's play and physical activity. Environments that promote greater independent mobility in children may increase their physical activity levels and hence reduce their risk of overweight/obesity. (PsycINFO Database Record (c) 2012 APA, all rights reserved) (journal abstract)

SN - 1479-5868

AD - Wen, Li Ming: Health Promotion Service, Sydney South West Area Health Service, Sydney, NSW, Australia Kite, James: Health Promotion Service, Sydney South West Area Health Service, Sydney, NSW, Australia Merom, Dafna: School of Public Health, University of Sydney, Sydney, NSW, Australia Rissel, Chris: Health Promotion Service, Sydney South West Area Health Service, Sydney, NSW, Australia

ER -

TY - JOUR

ID - 550

T1 - Review of Sexual sabotage: How one mad scientist unleashed a plague of corruption and contagion on America. [References]

A1 - Janssen,Diederik F.

Y1 - 2012///

N1 - Peer Reviewed Journal: 2012-28578-026

English

Journal; Peer Reviewed Journal

KW - PsycInfo

KW - Communities

KW - Contagion

KW - Family

KW - Sexuality

RP - NOT IN FILE

SP - 1315

EP - 1318

JF - Archives of Sexual Behavior

JA - Arch.Sex Behav

VL - 41:

IS - 5

N2 - Reviews the book, Sexual Sabotage: How One Mad Scientist Unleashed a Plague of Corruption and Contagion on America by Judith A. Reisman (2010). Reisman's recent work, with 1,103 footnotes, is a recapitulation of her 35-year anti-Kinsey campaign, already featuring book-length studies published in 1990, 1998, and 2006, as well as documentary appearances in 1995, 1998, and 2009. Reisman's ever more repetitive polemic, attacking, for instance, each and every contributor daring to appear in The Kinsey Institute's books on childhood, clearly aspires to spearhead American ultra-conservative resentment of sexology as a field "led by mad sexual psychopaths" who "sexualize everything-as the lugubrious child-harming front piece of an entire "postmodern" degeneration of Family and Nation. Reisman's book makes perfect sense where she engages this familiar calculus, in fact honoring Kinsey's own solicitation to play truth games. But the predicament of American sexologists must be clear: not to play taboo's game of generalizations and proclamations will make of you a sufferer of precisely qualified "distorted cognitions". In today's regime of fear, American sexologists will typically end up "uncovering" and soliciting the sour evidence American populists, eerily, seem to crave. Reisman can afford to be honest at sporadic junctures in her text, where she does not attempt to hide her moral concerns behind "35 years" of scientific posturing. To dismiss on an empirical basis her pitching of value, in any case, will risk complicity with her darker, precisely her "scientific," moments: exactly the scientific cover-up of moral dilemmas she accuses her nemesis Kinsey of. There's nothing wrong with moral conventions, obviously: incest taboos have ranked among the few universal traits of Man, and their particular, late modern transcriptions have convinced a whole generation of Child-savers, Woman-liberators, Family-protectors, Community-

guardians, and Nation-builders. Conversely: the moment taboos begin to require scientific (medical) approval, their days may be numbered. (PsycINFO Database Record (c) 2012 APA, all rights reserved)

SN - 0004-0002

ER -

TY - JOUR

ID - 552

T1 - Do theory and pedagogy have an impact on provisions for outdoor learning? A comparison of approaches in Australia and Norway. [References]

A1 - Sandseter, Ellen Beate Hansen; Little, Helen; Wyver, Shirley

Y1 - 2012///

N1 - Peer Reviewed Journal: 2012-22833-003

English

Journal; Peer Reviewed Journal

KW - PsycInfo

KW - Cross Cultural Differences

KW - Curriculum

KW - Learning Environment

KW - Teaching

KW - Early Childhood Development

KW - Education

KW - Theories

RP - NOT IN FILE

SP - 167

EP - 182

JF - Journal of Adventure Education and Outdoor Learning

VL - 12:

IS - 3

N2 - In this paper, we contrast the early childhood education and care aims and curriculum in Norway and Australia and the theoretical underpinnings of Norwegian and Australian pedagogy in an attempt to partially explain the different approaches to (risky) outdoor play in these two countries. We argue that Norwegian pedagogical approaches may allow teachers to theorize more about, and place greater emphasis on, physical and motor development than teachers in countries such as Australia. Evidence includes reference to theories typically used in Norwegian and Australian writing. Additionally, we examine interview data from teachers, which reveals that both groups of teachers share similar understandings of the importance of risk-taking in play, but there is more consistency between belief and practice for Norwegian than Australian teachers. We argue that the differences in alignment of belief and practice in the two countries are partly attributable to the differing theoretical bases of teachers' pedagogical approaches in each country. These findings have implications for theorizing about outdoor play and learning. In particular, we argue that early childhood teacher training programmes should include approaches based on Gibsonian and Dynamic Systems theories. (PsycINFO Database Record (c) 2012 APA, all rights reserved) (journal abstract)

SN - 1472-9679

AD - Sandseter, Ellen Beate Hansen: Queen Maud University College of Early Childhood Education (DMMH), Trondheim, Norway Little, Helen: Macquarie University, Macquarie Park, NSW, Australia Wyver, Shirley: Macquarie University, Macquarie Park, NSW, Australia

ER -

TY - JOUR

ID - 553

T1 - Temporal processing in children with language disorders. [References]

A1 - Burns, Martha

Y1 - 2011///

N1 - Book: 2010-22258-017

English

Book; Edited Book

KW - PsycInfo

KW - Auditory Perception

KW - Language Development

KW - Language Disorders

KW - Psycholinguistics

KW - Cognition

KW - Cognitions

KW - Cognitive Science

KW - Language

RP - NOT IN FILE

SP - 361

EP - 372

JF - Guendouzi, Jackie [Ed]; Loncke, Filip [Ed]; Williams, Mandy J [Ed]

VL - :

IS - 2011

N2 - (from the chapter) Noam Chomsky's theories ultimately led to the emergence of a new scientific discipline, psycholinguistics, which focused the fields of cognitive science and psychology on the importance of language to human cognition. This in turn, provided an enormous boost to the field of speech pathology by emphasizing the need for identification and remediation of language problems in children; ultimately leading in 1978 to the addition of Language in the name of the professional organization ASHA (from the American Speech and Hearing Association to the American Speech-Language-Hearing Association), and resulting in an approximate fivefold increase in certified ASHA members during the same time period. Yet, because of the profound influence of Chomsky during the period and the prevailing viewpoint that language was an innate human capacity, many psycholinguists originally dismissed the findings of other scientists, maintaining that nonverbal processing could not play a significant part in a neurological faculty innately derived through a "language acquisition device". Today, although some controversy persists regarding the importance of auditory processing in language acquisition, the prevalence of interdisciplinary research involving developmental psycholinguistics, clinicians and neuroscientists has led to a resurgence of interest in causal mechanisms of language disturbance and recognition of the importance of timing and synchrony in neurological cognitive systems. In this regard, what is now often referred to as the "temporal processing hypothesis," stemming from the research of Tallal and Piercy in the 1970s, has been refined and studied extensively in recent years. Essentially the hypothesis asserts that some language impaired children have difficulty processing rapidly changing acoustic details, which interferes with their ability to adequately parse incoming language signals into phonemes and thereby have an increased risk of developing speech, language, and/or reading problems. This explanation essentially views the capacity to process rapidly changing sensory inputs as a probable core neurological component of phonological processing. How this core capacity is understood by neuroscience and the role it may play in language acquisition is an unfolding scientific inquiry. This chapter will attempt to review and clarify the current state of neuroscience research that led to and supports the temporal processing hypothesis and will review research on assessment and the remediation value to auditory training of temporal processing skills. However, the viewpoint of this chapter is that the consideration of the role of temporal processing in language learning does not necessitate rejecting Chomsky or the vast accumulation of psycholinguistic research on language learning and language disorders. Rather, it is the perspective of this author, that understanding temporal processing adds to what some might consider the top-down influence of language and conceptual knowledge on learning by specifying co-occurring bottom-up processes that influence language learning as well. (PsycINFO Database Record (c) 2012 APA, all rights reserved)

AD - Burns, Martha: Department of Communication Sciences and Disorders, Northwestern University, Evanston, IL, US

ER -

TY - JOUR

ID - 554

T1 - Correlates of pupils' sense of futility in primary education in Flanders: The role of the teacher.

[References]

A1 - Van Houtte, Mieke; Van Maele, Dimitri; Agirdag, Orhan

Y1 - 2012///

N1 - Book: 2012-25935-008

English

Book; Edited Book

KW - PsycInfo

KW - Elementary School Students

KW - Elementary School Teachers

KW - Hopelessness

KW - Roles

KW - Student Attitudes

KW - Academic Achievement

KW - Elementary Education

KW - Elementary Schools

KW - Parent Child Relations

KW - School Environment

KW - Social Support

KW - Socioeconomic Status

KW - Trust (Social Behavior)

RP - NOT IN FILE

SP - 149

EP - 170

JF - DiPaola, Michael F [Ed]; Forsyth, Patrick B [Ed]

VL - :

IS - 2012

N2 - (from the chapter) Pupils' sense of futility with respect to school is an important predictor of lower achievement, lower study involvement, and school misconduct. Feelings of futility regarding school are particularly prevalent among pupils from lower socioeconomic status (SES) backgrounds. The present study examines which school and pupil features are associated with pupils' sense of futility. Furthermore, it aims to investigate the role teachers might play in either enhancing or buffering these feelings of futility, especially in low SES pupils, by taking into account the effect of faculty trust and pupils' perceived teacher support. By means of multilevel analysis of data collected during the 2008-2009 school year from 2,845 pupils and 706 teachers across a sample of 68 primary schools in Flanders (Belgium), this study confirms that higher feelings of futility associate with pupils' low SES background, low ability, and low perceived parental support. These associations result in higher levels of sense of futility in low SES and low ability schools. The findings also indicate the crucial role teachers might play. Although neither faculty trust nor perceived teacher support seem able to buffer the development of feelings of futility in low SES and low ability pupils, having trusting and supportive teachers lowers the risk of strong feelings of futility. An important policy implication of this study is therefore that it might be rewarding to improve faculty trust in pupils in order to fight pupils' feelings of futility. Other strategies are, however, advisable in order to buffer the higher feelings of futility in low SES pupils in particular. (PsycINFO Database Record (c) 2012 APA, all rights reserved)

AD - Van Houtte, Mieke: Ghent University, Department of Sociology, Research Group CuDOS, Belgium Van Maele, Dimitri: Ghent University, Department of Sociology, Research Group CuDOS, Belgium Agirdag, Orhan: Ghent University, Department of Sociology, Research Group CuDOS, Belgium

ER -

TY - JOUR

ID - 555

T1 - A dynamic systems approach to co-emotion regulation in preschoolers and mothers in the context of strange situation: Predictors and developmental consequences

A1 - Guo, Yuqing

Y1 - 2012///

N1 - Dissertation Abstract: 2012-99160-397

English

Dissertation Abstract

KW - PsycInfo

KW - Childhood Development

KW - Emotional Regulation

KW - Mother Child Relations

KW - Affective Valence

KW - Developmental Psychology

RP - NOT IN FILE

SP - 876

JF - Dissertation Abstracts International: Section B: The Sciences and Engineering

VL - 73:

IS - 2-B

N2 - Co-emotion regulation has been recognized as playing a crucial role in the developmental outcomes of young children. Despite many fruitful studies in this area, measuring the process of change within co-emotion regulation remains challenging. This study applied dynamic systems to define co-emotion regulation and introduced the State Space Grid to quantify its process of change. The study combined new behavioral coding of existing video archives of Strange Situation with secondary Seattle data from NICHD Study of Early Child Care and Young Development. Affect was coded in preschoolers and mothers in the first play and the second reunion episodes of Strange Situation. Repeated measure analysis mixed models were used to describe how co-emotion regulation changed between secure and insecure dyads from the first play to the second reunion. The results show that secure dyads had a stable affective regulation structure and were thus not prone to being impacted by separation of Strange Situation. Conversely, insecure dyads had an unstable affective regulation structure and were vulnerable to influence by the separation. The difference of co-emotion regulation between secure and insecure dyads existed before the separation and remained after the separation. Hierarchical multiple regression analyses were used to explore predictors of shared positive affect and its developmental outcomes after controlling for child, mother, and family covariates. Results found that maternal sensitivity mediated family risks and shared positive affect in the second reunion, but not in the first play, suggesting that history of maternal sensitivity plays a greater role in maintaining mutual positive affect under stressful situations than it does in non-stress or low-stress situations. Results also revealed that shared positive affect within a non-stressful context promotes cognitive competency and self-regulation development, while maintaining or quickly resuming shared positive affect after a stressful context is a protective factor for internalizing problems. Findings provide evidence that dynamic systems is a promising theoretical paradigm for conceptualizing co-emotion regulation and that State Space Grid is a valid method to operationalize its process of change. Applications for early prevention or intervention are discussed, as well as implications for nursing science. (PsycINFO Database Record (c) 2012 APA, all rights reserved)

SN - 0419-4217

AD - Guo, Yuqing: U Washington, US

ER -

TY - JOUR

ID - 556

T1 - Adult opinions about the age at which children can be left home alone, bathe alone, or bike alone: Second Injury Control and Risk Survey (ICARIS-2). [References]

A1 - Mack, Karin A.

Y1 - 2012///

N1 - Peer Reviewed Journal: 2012-19793-001

English

Journal; Peer Reviewed Journal

KW - PsycInfo

KW - Child Self Care

KW - Childhood Development

KW - Parental Attitudes

KW - Injuries

KW - Prevention

RP - NOT IN FILE

SP - 223

EP - 226

JF - Journal of Safety Research

JA - J Safety Res.

VL - 43:

IS - 3

N2 - Problem: This study describes adult opinions about child supervision during various activities. Methods: Data come from a survey of U.S. adults. Respondents were asked the minimum age a child could safely: stay home alone; bathe alone; or ride a bike alone. Respondents with children were asked if their child had ever been allowed to: play outside alone; play in a room at home for more than 10 minutes alone; bathe with another child; or bathe alone. Results: The mean age that adults believed a child could be home alone was 13.0 years (95% CI=12.9-13.1), bathe alone was 7.5 years (95% CI=7.4-7.6), or bike alone was 10.1 years (95% CI=10.0-10.3). There were significant differences by income, education, and race. Discussion: Assessing adult's understanding of the appropriate age for independent action helps set a context for providing guidance on parental supervision. Guidelines for parents should acknowledge social norms and child development stages. Impact on Industry: Knowledge of social norms can help guide injury prevention messages for parents. (PsycINFO Database Record (c) 2012 APA, all rights reserved) (journal abstract)

SN - 0022-4375

AD - Mack, Karin A.: Division of Unintentional Injury Prevention, National Center for Injury Prevention and Control, Centers for Disease Control and Prevention, Atlanta, GA, US Dellinger, Ann: National Center for Injury Prevention and Control, Centers for Disease Control and Prevention, Atlanta, GA, US West, Bethany A.: Division of Unintentional Injury Prevention, National Center for Injury Prevention and Control, Centers for Disease Control and Prevention, Atlanta, GA, US

ER -

TY - JOUR

ID - 557

T1 - A diathesis-stress model of victimization: Relations among temperament, peer victimization, psychopathology, and health problems

A1 - Biebl, Sara J.

Y1 - 2012///

N1 - Dissertation Abstract: 2012-99140-347

English

Dissertation Abstract

KW - PsycInfo

KW - Life Experiences

KW - Personality

KW - Psychopathology

KW - Stress

KW - Victimization

KW - Health

KW - Mathematical Modeling

KW - Peers

RP - NOT IN FILE

SP - 608

JF - Dissertation Abstracts International: Section B: The Sciences and Engineering

VL - 73:

IS - 1-B

N2 - Youth who are victimized by their peers are more likely to develop symptoms of psychopathology and health problems in adolescence and adulthood. Also, temperamental traits of behavioral inhibition and emotional reactivity have been found to be significant risk factors for the development of mental and physical health problems. Diathesis-stress models of psychopathology indicate that the interaction between temperament and experiences of trauma may lead an individual to develop psychopathology. Most studies using a biosocial model of psychopathology, however, have focused more on experiences of physical and sexual abuse rather than experiences of peer abuse. No studies to date have examined how experiences of peer victimization moderate the relationship between temperament and later experiences of psychopathology and health problems, which was the primary focus of the present study. A second aim of the present study was to examine how the stability of victimization throughout childhood related to health problems in adolescence. Seventy 12- to 20-year-old youth participated in the present longitudinal study. This longitudinal study included three specific time points. At time 1, when participants were five years of age, they engaged in a 20-minute peer play interaction and their parents completed temperament measures. Tapes of the peer play interaction were rated by trained

coders for instances of peer victimization. During time 2, these same youth were between the ages of 10 and 18 and were contacted again and asked to complete measures related to peer victimization. Finally, at time 3, which was the present study, participants were between the ages of 12 and 20 and completed a 1-hour telephone interview which was used to obtain information about experiences of peer victimization as well as mental and physical health outcomes. Results from the present study indicated that youth with specific early temperamental traits (behaviorally inhibited and difficult) and who experienced peer victimization that is impairing appeared to be at multiplicatively greater risk for developing mental and physical health problems in adolescence compared to youth who did not have these same biological vulnerabilities and environmental experiences. Additionally, youth who chronically experienced peer victimization had significantly more mental and physical health problems than youth who experienced less stable victimization. This study adds to the current research on peer victimization by using a diathesis-stress model to examine the interactive effects of peer victimization and temperament on negative mental health and physical health outcomes. Moreover, findings from this study will provide researchers and professionals with information that can aide in the development of interventions for children who experience peer victimization and who suffer from different types of health problems and symptoms of psychopathology. More specifically, by understanding how innate factors such as temperament interact with a child's experience of peer victimization, researchers and clinicians may be able to design more specialized interventions for children based on the patterns of their victimization experiences and temperamental traits. (PsycINFO Database Record (c) 2012 APA, all rights reserved)

SN - 0419-4217

AD - Biebl, Sara J. W.: Southern Illinois U Carbondale, US

ER -

TY - JOUR

ID - 558

T1 - Orangutans (*Pongo abelii*) "play the odds": Information-seeking strategies in relation to cost, risk, and benefit. [References]

A1 - Marsh, Heidi L.

Y1 - 2012///

N1 - Peer Reviewed Journal: 2011-24369-001

English

Journal; Peer Reviewed Journal

KW - PsycInfo

KW - Information Seeking

KW - Metacognition

KW - Primates (Nonhuman)

KW - Animal Cognition

RP - NOT IN FILE

SP - 263

EP - 278

JF - Journal of Comparative Psychology

JA - J Comp Psychol.

VL - 126:

IS - 3

N2 - Recent research has examined whether animals possess metacognition, or the ability to monitor their knowledge states. However, the extent to which animals actively control their knowledge states is still not well delineated. Although organisms might be capable of seeking information when it is lacking, it does not mean that it is always adaptive to do so. In the present set of experiments, we examined the flexibility of this behavior in captive orangutans (*Pongo abelii*; two adults and one juvenile) in a foraging task, by varying the necessity of information-seeking, the cost associated with it, the likelihood of error, and the value of the reward. In Experiment 1, subjects searched for information most often when it was "cheapest" energetically. In Experiment 2, subjects searched for information most often when the odds of making an error were the greatest. In Experiment 3, subjects searched for information more when the reward was doubled in value. In Experiment 4, adult subjects adapted to risk/benefit trade-offs in their searching behavior. In every experiment, subjects sought information more often when they needed it than when they already knew the solution to the problem. Therefore, the current research suggests that information-seeking behavior in orangutans shows a sophisticated level of flexibility, comparable to that seen in human children, as they appear to "play the odds" when making

the decision to seek information or not. (PsycINFO Database Record (c) 2012 APA, all rights reserved) (journal abstract)

SN - 0735-7036

AD - Marsh, Heidi L.: Department of Psychology, York University, Toronto, ON, Canada MacDonald, Suzanne E.: Department of Psychology, York University, Toronto, ON, Canada

ER -

TY - JOUR

ID - 559

T1 - Parents as HIV/AIDS educators. [References]

A1 - Krauss, Beatrice J.

Y1 - 2012///

N1 - Book: 2012-15887-004

English

Book; Edited Book

KW - PsycInfo

KW - AIDS Prevention

KW - Education

KW - HIV

KW - Parent Training

KW - Parents

KW - AIDS

KW - Caregivers

KW - Evidence Based Practice

KW - Intervention

KW - Parent Child Communication

RP - NOT IN FILE

SP - 97

EP - 120

JF - Pequegnat, Willo [Ed]; Bell, Carl C [Ed]

VL - :

IS - 2012

N2 - (from the chapter) Parents and caregivers play a special role in HIV prevention efforts for youth. Parents are able to reach youth early and in a non-controversial way. Parents can engage in continuous discussions about sex and sexuality, HIV, substance use, and sexual risk prevention. Having frequent contact with their children allows them to provide sequential and time-sensitive information that is immediately responsive to the child's questions and anticipated needs. Parents and caregivers help youth shape and form healthy attitudes and behaviors, and support youth with supervision, positive reinforcement and skills building. Given the proper tools to harness their parenting and communication skills, parents and caregivers are a force to be reckoned with. There is a growing literature that highlights the important role parents and caregivers play in addressing teen substance use and sexual risk behavior; however, evidence-based interventions to strengthen parents' role in HIV prevention or even in reproductive health promotion are rare and not widely disseminated. This chapter describes two evidence-based interventions. Parents Matter! and the Parent/Preadolescent Training for HIV (PATH) Prevention. Both are based on research addressing the need to intervene early, child-parent communication, and risk reduction science and strategies. Data on outcomes and description of the dissemination of these interventions are presented. Among the intriguing findings are that both projects were easily accepted by communities, both led to reported risk reduction or intention to reduce risk, and that improved communication may have generalized to create positive outcomes for risks other than those associated with HIV. Each intervention has found new audiences, through formal and informal pathways. A continuing challenge is to maintain and update interventions as new risks emerge and as new populations are at risk as the HIV epidemic changes. (PsycINFO Database Record (c) 2012 APA, all rights reserved)

AD - Krauss, Beatrice J.: City University of New York, School of Public Health, Hunter College, New York, NY, US Miller, Kim S.: Centers for Disease Control and Prevention, Center for Global Health, Division of Global HIV/AIDS Prevention, US

ER -



TY - JOUR

ID - 560

T1 - The development of self-representations across the life span. [References]

A1 - Diehl, Manfred

Y1 - 2011///

N1 - Book: 2011-03366-024

English

Book; Edited Book

KW - PsycInfo

KW - Developmental Psychology

KW - Life Span

KW - Adaptive Behavior

KW - Cognitive Development

KW - Culture (Anthropological)

KW - Life Expectancy

KW - Meaning

KW - Psychosocial Development

KW - Psychosocial Factors

KW - Resilience (Psychological)

KW - Self Concept

KW - Self Regulation

RP - NOT IN FILE

SP - 611

EP - 646

JF - Fingerman, Karen L [Ed]; Berg, Cynthia A [Ed]; Smith, Jacqui [Ed]; Antonucci, Toni C [Ed]

VL - :

IS - 2011

N2 - (from the chapter) This chapter focuses on the development of self-representations across the life span. The main questions addressed in this chapter are as follows: How do individuals develop an understanding of their own person and what are the developmental milestones in this process? How does the content and structural organization of self-representations change across the life span? How is individuals' development of self-representations linked to basic developmental processes in cognitive and social-emotional functioning? Are there qualitative differences in the organization and the functions of self-representations at different parts of the life span? What role do different social and cultural contexts play in the development of self-representations across the life span? These questions will be addressed within the meta-theoretical framework of life-span developmental psychology and from a perspective that conceives individuals as producers of their own development. These perspectives are chosen as guiding frameworks for several reasons. First, self-representations constitute what James defined as the self-concept, the Me-self, the self as object, or the self as known. Second, since the mid-1980s theory and research have conceptualized the self concept as a contextualized and dynamic knowledge structure with adaptive and self-regulatory functions. Third, life-span psychologists have emphasized that the self-concept gives individuals a sense of continuity and permanence, allows them to distinguish themselves and their developmental history from others, and gives their experiences meaning within a larger biography. For purposes of terminological clarity, it is important to provide a working definition of the key construct. Specifically, in this chapter the terms self-representations and self-concept are used interchangeably to refer to those attributes that are (1) part of a person's self-understanding and self-knowledge; (2) the focus of self-awareness and self-reflection; and (3) consciously acknowledged by the person through language or other means of communication. This chapter has three major parts. The first major part focuses on the development of self-representations in childhood and adolescence. Specifically, this section describes the developmental milestones from early childhood to late adolescence, the part of the life span for which the greatest amount of research exists. The second major part addresses the development of self-representations across the adult years, describing findings that cover the life span from early adulthood to late life. The third major section focuses on several key issues in the study of self-representations across the life span. These issues address to what extent and under what circumstances self-representations may serve as risk or resilience factors, what role social and cultural contexts play vis-a-vis self-representations, and whether psychosocial interventions can optimize the adaptive function of self-representations. This section also identifies

the major gaps in our current knowledge and outlines future directions for the study of self-representations.  
(PsycINFO Database Record (c) 2012 APA, all rights reserved)

AD - Diehl, Manfred: Department of Human Development and Family Studies, Colorado State University, Fort Collins, CO, US Youngblade, Lise M.: Department of Human Development and Family Studies, Colorado State University, Fort Collins, CO, US Hay, Elizabeth L.: Department of Human Development and Family Studies, Colorado State University, Fort Collins, CO, US Chui, Helena: Department of Human Development and Family Studies, Colorado State University, Fort Collins, CO, US

ER -

TY - JOUR

ID - 561

T1 - Sociodramatic play, family socioeconomic risk, and emotional competence in urban, preschool children

A1 - Muljat Bailey,Alesha

Y1 - 2012///

N1 - Dissertation Abstract: 2012-99100-550

English

Dissertation Abstract

KW - PsycInfo

KW - Competence

KW - Family

KW - Preschool Students

KW - Socioeconomic Status

KW - Urban Environments

KW - Literacy

KW - Peers

KW - Pretend Play

KW - Risk Factors

KW - Social Skills

RP - NOT IN FILE

SP - 7092

JF - Dissertation Abstracts International: Section B: The Sciences and Engineering

VL - 72:

IS - 11-B

N2 - Children's sociodramatic play (also known as make-believe or pretend play with peers) is positively related to numerous aspects of their cognitive and social competence, however, few studies have investigated its role in emotional competence. Family socioeconomic risk is associated with greater overall socioemotional and behavioral problems yet few studies have examined its relation to specific aspects of emotional competence. Further, the relation between family risk and sociodramatic play is equivocal. The present study investigated relations among children's frequency of sociodramatic play, children's emotional competence (emotional understanding and empathy), and family risk. Data were collected from 81 children, aged 4 to 5 years, and their primary parent/guardian and teacher. Participants were recruited from preschool classrooms in the greater Pacific Northwest serving families from diverse socioeconomic and ethnic backgrounds. Evidence was found for significant relations between children's sociodramatic play and emotional competence, as well as family risk and emotional competence. Children who engaged in more sociodramatic play had higher levels of anger attribution bias but not higher levels of emotion knowledge or empathy. Children with higher family risk had lower levels of emotion knowledge. No evidence was found for the relation between family risk and sociodramatic play. Further, the hypothesis that family risk would moderate the relation between sociodramatic play and emotional competence was partially supported. Family risk moderated the relation between sociodramatic play and anger attribution bias and showed a trend for moderating the relation between risk and emotion knowledge. Children with high levels of both family risk and sociodramatic play had higher levels of anger bias and lower levels of overall emotion knowledge than children with high risk and low levels of sociodramatic play. Conversely, the emotion knowledge of children with low levels of family risk was higher when they engaged in more sociodramatic play. These results suggest the benefits of sociodramatic play may differ for children from different risk backgrounds. There may be important qualitative differences in the play of children with varying risk levels. Future research should explicate these relations further and examine in more

detail the qualitative nature of play of children from different risk backgrounds. (PsycINFO Database Record (c) 2012 APA, all rights reserved)

SN - 0419-4217

AD - Muljat Bailey, Alesha: Seattle Pacific U., US

ER -

TY - JOUR

ID - 562

T1 - Adolescent motherhood and developmental outcomes of children in early Head Start: The influence of maternal parenting behaviors, well-being, and risk factors within the family setting. [References]

A1 - Rafferty, Yvonne

Y1 - 2011///

N1 - Peer Reviewed Journal: 2012-11012-011

English

Journal; Peer Reviewed Journal

KW - PsycInfo

KW - Adolescent Mothers

KW - Developmental Stages

KW - Mother Child Relations

KW - Risk Factors

KW - Well Being

KW - Cognitive Ability

KW - Family

KW - Language

KW - Lower Income Level

KW - Project Head Start

KW - Parenting

RP - NOT IN FILE

SP - 228

EP - 245

JF - American Journal of Orthopsychiatry

JA - Am J Orthopsychiatry

VL - 81:

IS - 2

N2 - This longitudinal study examined the influence of parenting behaviors, well-being, and risk factors of low-income adolescent mothers on the cognitive and language abilities of children from infancy to age 3.

Participants consisted of 1,240 mother-child dyads enrolled in the Early Head Start Research and Evaluation Project. Data were collected using structured interviews with the mothers and from videotaped mother-child interactions during play activities when children were approximately 14 months old and again at 36 months of age. Positive parenting behaviors exhibited toward the 14-month-old children predicted gains in both cognitive and language abilities more so than did maternal well-being, risk factors within the family setting, and demographic risk factors. Gains in cognitive abilities from infancy to age 3 were predicted by supportive parenting, higher family resources, and lower family conflict when children were infants. Gains in language abilities were predicted by supportive parenting, support for language and learning in the home environment, and higher family resources when children were infants. Finally, path analyses showed that maternal age had an indirect effect on child cognitive and language abilities at age 3 through effects on parenting behaviors. Older mothers were more likely to be supportive during play at age 14 months, which in turn promoted enhanced developmental outcomes at age 3. Implications for intervention and future research are discussed. (PsycINFO Database Record (c) 2012 APA, all rights reserved) (journal abstract)

SN - 0002-9432

AD - Rafferty, Yvonne: Pace University, New York, NY, US Griffin, Kenneth W.: Cornell University, Ithaca, NY, US Lodise, Michelle: Pace University, New York, NY, US

ER -

TY - JOUR

ID - 564

T1 - Directive and responsive behaviors of mothers in familiar and unfamiliar toy play with and without a single message voice output communication aid

A1 - Medeiros, Kara F.

Y1 - 2012///

N1 - Dissertation Abstract: 2012-99090-100

English

Dissertation Abstract

KW - PsycInfo

KW - Dyads

KW - Mother Child Communication

KW - Mother Child Relations

KW - Toys

KW - Messages

KW - Mothers

RP - NOT IN FILE

SP - 4000

JF - Dissertation Abstracts International Section A: Humanities and Social Sciences

VL - 72:

IS - 11-A

N2 - Twenty-five mother-child dyads participated in three types of toy play both with and without a BIGmack, a single-message voice-output communication aid (VOCA). Participants were mothers of children who were considered at-risk for being nonspeaking. A quantitative within-group research design was used for this project comparing maternal directive and responsive behaviors across toy play activities. The mothers were asked to play with their children using three types of toys: a) familiar, b) unfamiliar, and c) complex toys, both with and without a BIGmack VOCA that had been programmed to say "more" when pressed. Dyads participated in two experimental sessions in their home. During the first home visit, dyads were asked to "play and have fun" and asked to play with all three types of toys without the BIGmack, allowing for collection of baseline data of responsive and directive maternal behaviors in each type of toy play. At the next home visit, children and mothers were separated within the house and then children were taught to activate the BIGmack to request "more" in play. Children and mothers were then reunited and again asked to "play and have fun" with the same three types of toys with the BIGmack present. The dyad's play was recorded for a target of 10 minutes for each type of toy, and the mother's interactions using each type of toy were coded for responsive and directive behaviors. Rate-per-minute of maternal directive and responsive behaviors was analyzed using a repeated measures analysis of variance (ANOVA). Results indicated that mothers used significantly more responsive behaviors when playing with their own toys than with unfamiliar or complex toys. (PsycINFO Database Record (c) 2012 APA, all rights reserved)

SN - 0419-4209

AD - Medeiros, Kara F.: U Nebraska - Lincoln, US

ER -

TY - JOUR

ID - 566

T1 - Primary care management of child & adolescent depressive disorders. [References]

A1 - Wren, Frances J.

Y1 - 2012///

N1 - Peer Reviewed Journal: 2012-11600-015

English

Journal; Peer Reviewed Journal

KW - PsycInfo

KW - epidemiology

KW - Health Care Services

KW - Major Depression

KW - Primary Health Care

KW - Risk Factors

RP - NOT IN FILE

SP - 401

EP - 419

JF - Child and Adolescent Psychiatric Clinics of North America

VL - 21:

IS - 2

N2 - Depressive disorders are a problem with profound societal impact, whether measured by prevalence, burden of disability and suffering across the life span, mortality, or financial costs for health care and for society at large. As such, they merit strategic public health intervention. The World Health Organization estimates that 120 million people live with depressive disorders, of whom fewer than 25% receive any treatment. Integrating mental health services into primary care has been cited by World Health Organization as the most viable way of closing the treatment gap in mental health care. With this in mind, we discuss how recent work on the primary care management of mental health and psychosocial problems might be applied to pediatric depressive disorders. The general clinical effectiveness of the collaborative care approach is now viewed as established, at least compared with usual care in the integrated US health care settings, where the dominant model was developed. The task of preparing primary care providers to play an effective role in the management of pediatric depressive disorders is not small. The American Academy of Pediatrics (AAP) has acknowledged that it represents systemic change that will take time and involve transformational changes in pediatric primary care practice, requiring new knowledge and skills, payment structures, collaborative relationships, office systems, and resources. Less overtly acknowledged is that this will involve complementary changes in child mental health practice. Pediatric primary care providers have the potential to play powerful roles in reducing the burden of depression in further areas, outside the scope of this paper. We have mentioned the potential for using the longitudinal and early established relationship with the primary care clinician to identify and intervene early with conditions that are risk factors for later depressive disorders. In addition, primary care clinicians often see new mothers more than any other professional during the first year of a child's life. Finally, there are no data on how primary care clinicians will actually use the newly developed tools and on what impact any such changes in practice will have on the likelihood that depressed youth will receive treatment, on the types and adequacy of treatment provided and on clinical or cost outcomes. Dissemination must be accompanied by evaluation.

(PsycINFO Database Record (c) 2012 APA, all rights reserved)

SN - 1056-4993

AD - Wren, Frances J.: Department of Psychiatry and Behavioral Sciences, Stanford University School of Medicine, Stanford, CA, US Foy, Jane Meschan: Department of Pediatrics, Wake Forest University School of Medicine, Medical Center Boulevard, Winston-Salem, NC, US Ibeziako, Patricia I.: Harvard Medical School, Boston, MA, US

ER -

TY - JOUR

ID - 568

T1 - Focused attention, heart rate deceleration, and cognitive development in preterm and full-term infants.

[References]

A1 - Thomas, Julianne H.

Y1 - 2012///

N1 - Peer Reviewed Journal: 2012-09177-003

English

Journal; Peer Reviewed Journal

KW - PsycInfo

KW - Attention

KW - Cognitive Development

KW - Heart Rate

KW - Infant Development

KW - Premature Birth

RP - NOT IN FILE

SP - 383

EP - 400

JF - Developmental Psychobiology

VL - 54:

IS - 4

N2 - The majority of children who are born very preterm escape major impairment, yet more subtle cognitive and attention problems are very common in this population. Previous research has linked infant focused attention during exploratory play to later cognition in children born full-term and preterm. Infant focused attention can be indexed by sustained decreases in heart rate (HR). However there are no preterm studies that have jointly examined infant behavioral attention and concurrent HR response during exploratory play in relation to developing cognition. We recruited preterm infants free from neonatal conditions associated with major adverse outcomes, and further excluded infants with developmental delay (Bayley Mental Development Index [MDI < 70]) at 8 months corrected age (CA). During infant exploratory play at 8 months CA, focused attention and concurrent HR response were compared in 83 preterm infants (born 23-32 weeks gestational age [GA]) who escaped major impairment to 46 fullterm infants. Focused attention and HR response were then examined in relation to Bayley MDI, after adjusting for neonatal risk. MDI did not differ by group, yet full-term infants displayed higher global focused attention ratings. Among the extremely preterm infants born < 29 weeks, fewer days on mechanical ventilation, mean longest focus, and greater HR deceleration during focused attention episodes, accounted for 49% of adjusted variance in predicting concurrent MDI. There were no significant associations for later-born gestational age (29-32 weeks) or full-term infants. Among extremely preterm infants who escape major impairment, our findings suggest unique relationships between focused attention, HR deceleration, and developing cognition. (PsycINFO Database Record (c) 2012 APA, all rights reserved) (journal abstract)

SN - 0012-1630

AD - Thomas, Julianne H. Petrie: Neonatal Follow-Up Program, Children's and Women's Health Centre of British Columbia, Vancouver, BC, Canada Whitfield, Michael F.: Neonatal Follow-Up Program, Children's and Women's Health Centre of British Columbia, Vancouver, BC, Canada Oberlander, Tim F.: Neonatal Follow-Up Program, Children's and Women's Health Centre of British Columbia, Vancouver, BC, Canada Synnes, Anne R.: Neonatal Follow-Up Program, Children's and Women's Health Centre of British Columbia, Vancouver, BC, Canada Grunau, Ruth E.: Neonatal Follow-Up Program, Children's and Women's Health Centre of British Columbia, Vancouver, BC, Canada

ER -

TY - JOUR

ID - 569

T1 - Restorative magical adventure or warcrack? Motivated MMO play and the pleasures and perils of online experience. [References]

A1 - Snodgrass,Jeffrey G.

Y1 - 2012///

N1 - Peer Reviewed Journal: 2012-08438-001

English

Journal; Peer Reviewed Journal

KW - PsycInfo

KW - Computer Games

KW - Experiences (Events)

KW - Internet

KW - Motivation

KW - Online Social Networks

KW - Addiction

RP - NOT IN FILE

SP - 3

EP - 28

JF - Games and Culture: A Journal of Interactive Media

VL - 7:

IS - 1

N2 - Combining perspectives from the new science of happiness with discussions regarding "problematic" and "addictive" play in multiplayer online games, the authors examine how player motivations pattern both positive and negative gaming experiences. Specifically, using ethnographic interviews and a survey, the authors explore the utility of Yee's three-factor motivational framework for explaining the positive or negative quality of experiences in the popular online game World of War-craft (2004-2012). The authors find that playing to Achieve is strongly associated with distressful play, results that support findings from other studies. By contrast,

Social and Immersion play lead more typically to positive gaming experiences, conclusions diverging from those frequently reported in the literature. Overall, the authors suggest that paying attention to the positive as well as negative dimensions of inhabiting these online worlds will provide both for more balanced portraits of gamers' experiences and also potentially clarify pathways toward problematic and addictive play. (PsycINFO Database Record (c) 2012 APA, all rights reserved) (journal abstract)

SN - 1555-4120

AD - Snodgrass, Jeffrey G.: Colorado State University, Fort Collins, CO, US Dengah, H. J. Francois: University of Alabama, Tuscaloosa, AL, US Lacy, Michael G.: Colorado State University, Fort Collins, CO, US Fagan, Jesse: Colorado State University, Fort Collins, CO, US Most, David: Colorado State University, Fort Collins, CO, US Blank, Michael: Colorado State University, Fort Collins, CO, US Howard, Lahoma: Colorado State University, Fort Collins, CO, US Kershner, Chad R.: Colorado State University, Fort Collins, CO, US Krambeer, Gregory: Colorado State University, Fort Collins, CO, US Leavitt-Reynolds, Alissa: Colorado State University, Fort Collins, CO, US Reynolds, Adam: Colorado State University, Fort Collins, CO, US Vyvial-Larson, Jessica: Colorado State University, Fort Collins, CO, US Whaley, Josh: Colorado State University, Fort Collins, CO, US Wintersteen, Benjamin: Colorado State University, Fort Collins, CO, US

ER -

TY - JOUR

ID - 571

T1 - Restrictive safety or unsafe freedom? Norwegian ECEC practitioners' perceptions and practices concerning children's risky play. [References]

A1 - Sandseter, Ellen Beate Hansen

Y1 - 2012///

N1 - Peer Reviewed Journal: 2011-28752-006

English

Journal; Peer Reviewed Journal

KW - PsycInfo

KW - Child Care

KW - Childhood Play Behavior

KW - Professional Personnel

KW - Risk Taking

KW - Safety

KW - Education

RP - NOT IN FILE

SP - 83

EP - 101

JF - Child Care in Practice

VL - 18:

IS - 1

N2 - Many countries face a growing debate on the balance between ensuring children's safety and allowing children to play in physically and emotionally stimulating and challenging environments. This study is theoretically and conceptually situated within this debate, focusing on how early childhood education and care (ECEC) practitioners perceive the risk in children's play, and how they handle children's physical risk-taking given their dual responsibilities to keep children safe and to provide enough developmental challenges. Qualitative semi-structured interviews were conducted with seven ECEC practitioners with the goal of gaining insight into their opinions and reflections on children's risky play in kindergarten. The results show that Norwegian ECEC practitioners assess children's opportunities to engage in risky play in kindergarten as good: play environments provide opportunities for risky play, and practitioners allow and encourage children's risky play. The practitioners have a positive attitude toward risky play and state that they think it is important for children's development. The interviews show that the strategies for handling risky play are adapted instinctively in the play situation, considering each child individually, and common boundaries or rules are rare. The results of this study are a contribution to the discussion on children's play safety and how to handle risk-taking play in ECEC settings, and would hopefully be inspiring to ECEC practitioners and politicians in countries other than Norway. (PsycINFO Database Record (c) 2012 APA, all rights reserved) (journal abstract)

SN - 1357-5279

AD - Sandseter, Ellen Beate Hansen: Queen Maud University College of Early Childhood Education, Trondheim, Norway

ER -

TY - JOUR

ID - 572

T1 - Childcare practices among construction workers in Chira Chas, Jharkhand. [References]

A1 - Dhar,Rajib

Y1 - 2012///

N1 - Peer Reviewed Journal: 2011-28752-003

English

Journal; Peer Reviewed Journal

KW - PsycInfo

KW - Blue Collar Workers

KW - Child Care

KW - Lower Income Level

KW - Parents

RP - NOT IN FILE

SP - 23

EP - 50

JF - Child Care in Practice

VL - 18:

IS - 1

N2 - This study aims at examining the childcare practices and issues experienced by the low-income construction workers in India. It is concerned with understanding varied aspects relating to problems that construction workers, as parents, face while bringing up their children in one of the small construction companies of eastern India, in the state of Jharkhand. Qualitative methods have been used in order to collect the data based upon phenomenological principles. Ethnography and photo-elicitation were used as a primary method of data collection. Apart from this, in-depth interviews were also conducted with the workers of the construction company. Discussion with the participants led to the emergence of four themes: children left alone; playing at risky site areas; poor health of children; and children working along with parents. The research findings indicate that infants are taken by their parents to their place of work whereas children between five and 10 years had to be left alone at home. It was also found that acute poverty was a major cause leading to the consumption of inadequate and low nutritional food, leading to poor health of the children. Based on the study findings, there is an imperative that societal forerunners and philanthropists continue to use research findings to understand the childcare practices amongst the low-income workers and draft strategies accordingly, to improve the situation. (PsycINFO Database Record (c) 2012 APA, all rights reserved) (journal abstract)

SN - 1357-5279

AD - Dhar, Rajib: Symbiosis International University, India

ER -

TY - JOUR

ID - 574

T1 - Reviews of Risk and adventure in early years outdoor play: Learning from forest schools and Forest schools for all. [References]

A1 - Huggins,Valerie

Y1 - 2012///

N1 - Peer Reviewed Journal: 2012-03732-009

English

Journal; Peer Reviewed Journal

KW - PsycInfo

KW - Childhood Play Behavior

KW - Education

KW - Learning

KW - Schools

KW - Wilderness Experience



RP - NOT IN FILE

SP - 99

EP - 100

JF - Early Years: An International Journal of Research and Development

VL - 32:

IS - 1

N2 - Reviews the books, Risk and adventure in early years outdoor play: Learning from forest schools by Sara Knight (2011) and Forest schools for all by Sara Knight (2011). The first book draws on the author's experience as a lead forest school practitioner to argue the necessity for young children to have adventurous, challenging outdoor activities, whilst recognizing that many early years workers lack expertise in this area and are nervous about providing what they see as dangerous play activities outdoors. So, the focus of the book is reassuringly practical, and discussion about the management of any risks involved is prominent throughout. The book has considerable strengths as a resource for early years practitioners, and the staff of a setting could well use it to support the systematic development of their outdoor provision, discussing and using the activities and points for practice incorporated into each chapter. The second book extends the focus in a most interesting and helpful way by analyzing how forest schools in the UK have developed and shows how, through the forest schools for all approach, their innovative provision and practice in outdoor learning are being adopted within later stages of education. So, in both books the focus is very practical. (PsycINFO Database Record (c) 2012 APA, all rights reserved)

SN - 0957-5146

AD - Huggins, Valerie: Plymouth University, Plymouth, United Kingdom

ER -

TY - JOUR

ID - 576

T1 - Participation in play activities of children with cerebral palsy

A1 - Malkawi,Somaya H.

Y1 - 2011///

N1 - Dissertation Abstract: 2011-99220-040

English

Dissertation Abstract

KW - PsycInfo

KW - ABILITY

KW - Cerebral Palsy

KW - Childhood Play Behavior

KW - Motor Processes

KW - At Risk Populations

RP - NOT IN FILE

SP - 2715

JF - Dissertation Abstracts International: Section B: The Sciences and Engineering

VL - 72:

IS - 5-B

N2 - The aim of this study was to describe the overall play participation of children with cerebral palsy (CP) aged 9-13 years by measuring what activities they participate in using the Preteen Play Profile (Henry, 2000); and to explore variations in participation in different play categories based on each child's manual ability, gross motor function, CP distribution, age and gender. A mail-based survey was conducted of children with CP from three facilities in the United States. Of 252 surveys mailed, 15 were undeliverable because of the wrong addresses and 93 completed surveys were returned (39.2%). The children (58 males, 35 females) were aged between 9 and 13 years (mean age 11 years 1 month, SD= 1.06). Findings showed that children with CP participated in a wide range of activities in the past year. The majority of play activities were indoor rather than outdoor, sedentary rather than active, and lack structure. Watching television and listening to music was by far the children's major play activity. Play categories were ranked from highest to lowest in play participation as follows: indoor, creative, social, summer, outdoor, winter, sports and lessons. It was found that children with quadriplegia who are in Levels IV and V on both the MACS and GMFCS are the most at risk groups of decreased play participation. The children's manual ability and gross motor function were the main predictors of play participation indicating the need for using both classification systems in practice and research. Children of

both genders participated in similar play activities but when analyzing separate play categories, females achieved significantly higher scores than males in creative, lessons and social activities. The results of this study pointed to the need for integration of more outdoor, sports, and social play into the daily routines and curricula of centers, and schools that serve children with CP. The study concluded with some recommendations on how deficiencies and gaps in play participation can be filled through several proactive approaches that pediatric occupational therapists can take in conjunction with caregivers and community members to improve the lives of children with CP. (PsycINFO Database Record (c) 2012 APA, all rights reserved)

SN - 0419-4217

AD - Malkawi, Somaya H.: U Kentucky, US

ER -

TY - JOUR

ID - 577

T1 - Young children and educators engagement and learning outdoors: A basis for rights-based programming. [References]

A1 - Blanchet-Cohen, Natasha; Elliot, Enid

Y1 - 2011///

N1 - Peer Reviewed Journal: 2011-23994-006

English

Journal; Peer Reviewed Journal

KW - PsycInfo

KW - Early Childhood Development

KW - Learning Environment

KW - Student Engagement

KW - Teachers

RP - NOT IN FILE

SP - 757

EP - 777

JF - Early Education and Development

VL - 22:

IS - 5

N2 - Research Findings: This article reports on a study undertaken with 4 early childhood programs in a medium-size city in Canada investigating young children's and educators' perspectives on engagement and learning possibilities outdoors. A rights-based methodology including participant observations and interactive activities with children as well as focus groups and discussion groups with educators reveals the diversity and richness of young children's learning opportunities in the natural outdoor space. Educators also talk about forming more egalitarian and fulfilling relationships with children in outdoor activities. The value educators placed on play in natural spaces led to the creation of opportunities for play outside and motivated educators to support children's interactions outdoors by mediating policy and societal fear of the risk of outdoor play.

Practice or Policy: The results of the study highlight the value of a learning community for early childhood educators so that they might support children's full use of outdoor space and the critical role of adult allies in advocating for rights-based programming. (PsycINFO Database Record (c) 2012 APA, all rights reserved) (journal abstract)

SN - 1040-9289

AD - Blanchet-Cohen, Natasha: Department of Applied Human Sciences, Concordia University, Montreal, PQ, Canada Elliot, Enid: School of Child and Youth Care, University of Victoria, Victoria, BC, Canada

ER -

TY - JOUR

ID - 579

T1 - Exploring the effects of a social communication intervention on the interactive play of young at-risk children

A1 - Denning, Christopher B.

Y1 - 2011///

N1 - Dissertation Abstract: 2011-99230-165

English

Dissertation Abstract

KW - PsycInfo

KW - At Risk Populations

KW - Childhood Development

KW - Communication Skills Training

KW - School Based Intervention

RP - NOT IN FILE

SP - 1958

JF - Dissertation Abstracts International Section A: Humanities and Social Sciences

VL - 72:

IS - 6-A

N2 - The purpose of this study was to provide a retrospective analysis of data collected during a series of single subject design studies of a social communication intervention targeting skills such as initiations, responses, turn-takes, and name use (Stanton-Chapman, Denning, & Jamison, 2008; Stanton-Chapman, Denning, & Jamison, in review; Stanton-Chapman, Jamison, & Denning, 2008). The present study investigated the children's interactive play exhibited throughout a 10-minute period of free-play during a social communication intervention that consisted of five baseline and fifteen intervention sessions. Additionally, the play behaviors of the children were examined using percent non-overlapping data (PND) and multilevel modeling (MLM). To achieve these purposes the following research questions were addressed: (a) whether solitary play (e.g., solitary, onlooker, parallel) and interactive play differed across measurement occasions (e.g., baseline, intervention)? And whether children differed in their response to the intervention based upon presence of an identified disability? The children in the study were preschool students ( $n = 34$ ) enrolled in Head Start and collaborative classrooms and kindergarten students. Their ages ranged from 44 months to 70 months. Participants had poor language skills, poor social skills, problem behavior, or all of the above. The results indicated that children's parallel play decreased and their interactive play increased as a result of the intervention based upon PND values and MLM analysis. In addition, children with SLI had better outcomes than other children in the study, and children with DD had poorer outcomes than other children in the study. Males and all male dyads appeared to outperform females and all female dyads, and mixed dyads appeared to have the poorest results based upon PND and visual analysis. Implications from the present study include the following. When planning centers in preschool classrooms teachers may need to consider the purpose of the center and how children respond to different themes. Second, the present study highlighted that teachers should attend to the gender pairings of children during a social skill intervention. Future research needs to examine whether the effects of treatment diminish over time. Lastly, additional research is needed to understand how different groups respond to social communication interventions. (PsycINFO Database Record (c) 2012 APA, all rights reserved)

SN - 0419-4209

AD - Denning, Christopher B.: U Virginia, US

ER -

TY - JOUR

ID - 580

T1 - Football pitches and Barbie dolls: Young children's perceptions of their school playground. [References]

A1 - Pearce, Gemma

Y1 - 2011///

N1 - Peer Reviewed Journal: 2011-25781-006

English

Journal; Peer Reviewed Journal

KW - PsycInfo

KW - Childhood Development

KW - Childhood Play Behavior

KW - Playgrounds

KW - Football

RP - NOT IN FILE

SP - 1361

EP - 1379

JF - Early Child Development and Care

VL - 181:

IS - 10

N2 - Playgrounds and play times offer valuable contexts for children to explore and learn about themselves and their social lives. This study sought to gather evidence of children's perceptions of their playgrounds and play times, specifically whether the playgrounds were seen positively or negatively and the types of activities in which they engaged. Child-oriented methods were adopted inspired by the Mosaic approach. The main themes from the focus group interviews were social play (friendship, loneliness/solitude and fair play); physical activity play (activities and rationale); risk (injuries and bullying); and gender (action/stillness and gendered roles). Research suggests that segregation declines when adult supervision supports shared play, and our experiences suggest that such intervention is the most likely solution to the 'problem' of gender play in this setting. (PsycINFO Database Record (c) 2012 APA, all rights reserved) (journal abstract)

SN - 0300-4430

AD - Pearce, Gemma: School of Sport and Exercise Sciences, University of Birmingham, Birmingham, United Kingdom Bailey, Richard P.: RBES Ltd., Birmingham, United Kingdom

ER -

TY - JOUR

ID - 581

T1 - Using a framework to explore associations between parental substance use and the health outcomes of their adolescent children. [References]

A1 - Francis, Shelley A.

Y1 - 2011///

N1 - Peer Reviewed Journal: 2010-26854-001

English

Journal; Peer Reviewed Journal

KW - PsycInfo

KW - Adolescent Development

KW - Drug Abuse

KW - Parental Characteristics

KW - Risk Taking

KW - Health

KW - Sexual Risk Taking

RP - NOT IN FILE

SP - 1

EP - 14

JF - Journal of Child & Adolescent Substance Abuse

VL - 20:

IS - 1

N2 - Risk-taking behavior plays a significant role in the lives of adolescents. Adolescents engaging in risk behaviors such as substance use and risky sexual activity are at increased risk for contracting STDs, unplanned pregnancy, and other health problems. Consequently, children of substance abusers are at even greater risk for engaging in maladaptive behaviors given their social environment and the potential exposure to parental substance use/abuse. Although the empirical literature on adolescent risk-taking behavior is vast, less empirical research has examined how parental substance use is associated with the health outcomes of adolescent children of substance abusers, especially children of parents who use illicit substances. This study proposes a framework to synthesize the research on the health outcomes of adolescent children of substance abusers and provides recommendations for future study. (PsycINFO Database Record (c) 2012 APA, all rights reserved) (journal abstract)

SN - 1067-828X

AD - Francis, Shelley A.: Ohio State University, Columbus, OH, US

ER -

TY - JOUR

ID - 582

T1 - Children's choices and strategies in video games. [References]

A1 - Hamlen, Karla R.

Y1 - 2011///

N1 - Peer Reviewed Journal: 2010-24267-059

English

Journal; Peer Reviewed Journal

KW - PsycInfo

KW - Computer Games

KW - Decision Making

KW - Learning Environment

KW - Schools

RP - NOT IN FILE

SP - 532

EP - 539

JF - Computers in Human Behavior

VL - 27:

IS - 1

N2 - It is important to develop an understanding of children's engagement and choices in learning experiences outside of school as this has implications for their development and orientations to other learning environments. This mixed-methods study examines relationships between the genres of video games children choose to play and the learning strategies they employ to improve at these games. It also explores students' motivations for playing the games they choose to play. One hundred eighteen fourth- and fifth-grade students participated in this study. Qualitative analyses of student responses resulted in a model for classifying motivation for game choices. Children primarily cite reasons that can be classified as psychological or cognitive reasons for choosing to play certain video games, and are motivated by the challenge and thinking required in the games. Analyses using Chi-square tests of association demonstrated significant relationships between video game genre and learning strategy used for two of the six learning strategies ( $p < .05$ ). Children playing action games are more likely to use repetition to learn the game and children playing adventure games are more likely to use their imaginations to take on the role of the character in the game and think the way the character would to make decisions in the game. There were also several gender differences in learning preferences. (PsycINFO Database Record (c) 2012 APA, all rights reserved) (journal abstract)

SN - 0747-5632

AD - Hamlen, Karla R.: Department of Curriculum & Foundations, Cleveland State University, Cleveland, OH, US

ER -

TY - JOUR

ID - 583

T1 - Measuring safety levels in playgrounds using environment assessment scales: The issue of playground safety in Greece. [References]

A1 - Botsoglou, Kafenia; Hrisikou, Spyridoula; Kakana, Domna Mika

Y1 - 2011///

N1 - Peer Reviewed Journal: 2011-10247-003

English

Journal; Peer Reviewed Journal

KW - PsycInfo

KW - Playgrounds

KW - Safety

KW - Risk Assessment

RP - NOT IN FILE

SP - 749

EP - 760

JF - Early Child Development and Care

VL - 181:

IS - 6

N2 - Playgrounds beget an unrivalled context which, through play activity, can foster children's growth. The foremost function of all playgrounds is to provide for safety. In the present study, our primary focus is to

determine the degree of adequacy as far as playground equipment is concerned, including estimates of imminent dangers and the level of compliance with the Greek safety standards. Thus, a relevant assessment scale was constructed based on the standards of the US National Program for Playground Safety and the Consumer Product Safety Commission that include all criteria relevant to safety. Our observations were rated as 'adequate' or 'inadequate' according to predetermined characteristics, and they were subsequently recoded into 'yes' or 'no', respectively, stating the existence or the absence of danger imminence, and finally each kind of equipment was measured in numbers. Results show that approximately all of our sample playgrounds failed to meet current specification requirements for playground safety. The practical implications of the present study entail that a plan for the supervision and upkeep of playground quality should be developed at a national level. In this way, playgrounds in Greece would guarantee for a safer context and foster entertainment, learning and general well-being. (PsycINFO Database Record (c) 2012 APA, all rights reserved) (journal abstract)

SN - 0300-4430

AD - Botsoglou, Kafenia: Special Education Department, University of Thessaly, Volos, Greece Hrisikou, Spyridoula: Early Childhood Education Department, University of Thessaly, Volos, Greece Kakana, Domna Mika: Early Childhood Education Department, University of Thessaly, Volos, Greece

ER -

TY - JOUR

ID - 584

T1 - Promoting turn-taking skills in preschool children with disabilities: The effects of a peer-based social communication intervention. [References]

A1 - Stanton-Chapman, Tina L.

Y1 - 2011///

N1 - Peer Reviewed Journal: 2010-25929-001

English

Journal; Peer Reviewed Journal

KW - PsycInfo

KW - Communication Skills Training

KW - Developmental Disabilities

KW - Interpersonal Communication

KW - Peers

KW - Social Interaction

RP - NOT IN FILE

SP - 303

EP - 319

JF - Early Childhood Research Quarterly

VL - 26:

IS - 3

N2 - The current study evaluated the turn-taking skills of preschoolers with disabilities who participated in a social communication intervention that targeted initiations, responses, and turn-taking skills, and taught children to repair and revise and to avoid interruptions and overlaps. Ten children who enrolled in an inclusive at-risk classroom met the inclusion criteria. A multiple baseline design across two dyads replicated across three additional dyads was used to determine the effects of the intervention. The social communication intervention was highly effective for five children, moderately effective for three children, and mildly effective for two children in increasing the rate of initiations with an immediate peer response from baseline to intervention. The social communication intervention was highly effective for one child, moderately effective for three children, mildly effective for two children, and ineffective for four children in improving turn-taking skills.

Generalization results showed that nine out of ten participants demonstrated increased peer play following the intervention, increased levels of child-initiated interactions with a positive peer response, and decreased levels of solitary play. Several implications for practice were derived from the findings. By teaching children turn-taking strategies, the quality of social interactions that children have with their peers is likely to improve. The intervention offers a more systematic technique for teaching social communication and play skills than do informal strategies commonly used by teachers. Social validity assessments indicated that teachers found the intervention acceptable and produced important changes in behavior. (PsycINFO Database Record (c) 2012 APA, all rights reserved) (journal abstract)

SN - 0885-2006

AD - Stanton-Chapman, Tina L.: University of Virginia, Charlottesville, VA, US Snell, Martha E.: University of Virginia, Charlottesville, VA, US

ER -

TY - JOUR

ID - 585

T1 - Playing with the elephant in the room: A group play therapy treatment manual for young children of parents with alcoholism

A1 - Shores, Jessica Sunny

Y1 - 2011///

N1 - Dissertation Abstract: 2011-99060-125

English

Dissertation Abstract

KW - PsycInfo

KW - Alcoholism

KW - Group Psychotherapy

KW - Mental Health

KW - Parents

KW - Play Therapy

RP - NOT IN FILE

SP - 5805

JF - Dissertation Abstracts International: Section B: The Sciences and Engineering

VL - 71:

IS - 9-B

N2 - Due to the increase in the large numbers of children growing up in homes with parents who struggle with alcoholism, more attention has recently been given to the physical and mental health of children of alcohol-dependent parents. Even though the substance abuse, family, and child development research have more recently begun to notice and understand the psychopathology of children of parents with alcoholism, there continues to be a lack in evidence based approaches to treating these children's specific problems. An extensive review of the literature reveals that children of parents with alcoholism suffer from a variety of emotional, behavioral, and social problems due to the increased chance of abuse, neglect, and chaos provided by the family environment impacted by alcoholism. Research supports that the family dynamics, behaviors of parents with alcoholism, and the parent-child relationship are all major factors in determining how a child might develop specific characteristics for relating to others and develop particular problematic thought processes, behavioral issues, and difficulty regulating emotion evident at both home and school. Young children of parents living with alcoholism are at risk for developing substance abuse and other unhealthy ways for coping as a result of their chaotic and dysfunctional home environment. These children are observed in schools, extracurricular activities, and home environments as typically insecure, fearful, anxious, sad, aggressive, withdrawn, or overachieving. While these characteristics have been noted throughout the literature, mental health professionals continue to lack specialized treatment programs targeting children affected by alcoholism. The current dissertation offers professionals the opportunity to gain knowledge regarding the psychosocial functioning of children of parents suffering from alcoholism in relation to their family and peer relationships, while also providing information on the small number of treatment modalities described in the literature today. The included manual provides practitioners with a step-by-step group play therapy program designed for young children of parents with alcoholism. The goals of this intervention are: improving social functioning, increasing trust, security, and self-esteem, enhancing coping skills for emotion regulation, and facilitating disclosure of trauma and distress. Additional benefits include decreasing aggression, secrecy, shame, and guilt that may be associated with the family's struggle with alcoholism. (PsycINFO Database Record (c) 2012 APA, all rights reserved)

SN - 0419-4217

AD - Shores, Jessica Sunny: U Hartford, US

ER -

TY - JOUR

ID - 586

T1 - Maternal scaffolding and preterm toddlers' visual-spatial processing and emerging working memory.

[References]

A1 - Dilworth-Bart, Janean; Poehlmann, Julie; Hilgendorf, Amy E; Miller, Kyle; Lambert, Heather

Y1 - 2010///

N1 - Peer Reviewed Journal: 2010-03981-014

English

Journal; Peer Reviewed Journal

KW - PsycInfo

KW - Infant Development

KW - Neonatal Period

KW - Premature Birth

KW - Short Term Memory

KW - Visuospatial Ability

KW - At Risk Populations

KW - Mothers

KW - Scaffolding

KW - Socioeconomic Status

RP - NOT IN FILE

SP - 209

EP - 220

JF - Journal of Pediatric Psychology

JA - J Pediatr Psychol.

VL - 35:

IS - 2

N2 - Objective: We examined longitudinal associations among neonatal and socioeconomic risks, maternal scaffolding behaviors, and 24-month visual-spatial processing and working memory in a sample of 73 toddlers born preterm or low birthweight (PT LBW). Methods: Risk data were collected at hospital discharge and dyadic play interactions were observed at 16-months postterm. Abbreviated IQ scores, verbal/nonverbal working memory, and verbal/nonverbal visual-spatial processing data were collected at 24-months postterm. Results: Higher attention scaffolding and lower emotion scaffolding during 16-month play were associated with 24-month verbal working memory scores. A joint significance test revealed that maternal attention and emotion scaffolding during 16-month play mediated the relationship between socioeconomic risk and 24-month verbal working memory. Conclusions: These findings suggest areas for future research and intervention with children born PT LBW who also experience high socioeconomic risk. (PsycINFO Database Record (c) 2013 APA, all rights reserved) (journal abstract)

SN - 0146-8693

AD - Dilworth-Bart, Janean: University of Wisconsin, Madison, WI, US Poehlmann, Julie: University of Wisconsin, Madison, WI, US Hilgendorf, Amy E.: University of Wisconsin, Madison, WI, US Miller, Kyle: University of Wisconsin, Madison, WI, US Lambert, Heather: University of Wisconsin, Madison, WI, US  
ER -

TY - JOUR

ID - 589

T1 - Long-term effects of interparental violence and child physical maltreatment experiences on PTSD and behavior problems: A national survey of Taiwanese college students. [References]

A1 - Shen, April Chiung-Tao

Y1 - 2009///

N1 - Peer Reviewed Journal: 2009-06228-004

English

Journal; Peer Reviewed Journal

KW - PsycInfo

KW - Behavior Problems

KW - Child Abuse

KW - Domestic Violence

KW - Physical Abuse

KW - Posttraumatic Stress Disorder

KW - Parents

RP - NOT IN FILE



SP - 148

EP - 160

JF - Child Abuse &amp; Neglect

JA - Child Abuse Negl.

VL - 33:

IS - 3

N2 - Objectives: This study investigated the joint long-term impact of witnessing interparental violence and experiencing child physical maltreatment on young adults' trauma symptoms and behavior problems. It also explored Chinese traditional beliefs as a possible contributor to young adults' trauma and behavior. Methods: This study used self-reporting measures to collect data from a national proportionate stratified sample of 1,924 college students in Taiwan. The sample was divided into four groups: no violence; interparental violence only; child physical maltreatment only and dual violence, to compare the combined effect of dual violence on long-term outcome with the no violence group and the one type of violence group. Results: The results indicated a significant association of interparental violence and child physical maltreatment, and 11.3% of participants reported witnessing partner violence between parents and experiencing physical maltreatment during childhood. Participants experiencing dual violence reported more trauma symptoms and behavior problems than did those experiencing only one form of violence or none at all. Exposure to both interparental violence and child physical maltreatment during childhood is a significant predictor of young adults' trauma symptoms and behavior problems, after controlling for other potentially confounding risk factors. Cultural factors also play a significant role in predicting young adults' trauma symptoms and internalizing behavior problems, after accounting for control variables and violence-related variables. Moreover, cultural factors interact significantly with dual violence experiences in predicting young adults' externalizing behavior problems. Conclusions: This study extended Western co-occurrence study findings with large Taiwanese community samples. The results demonstrated that dual violence experiences during childhood have long-term detrimental impact on young adults' trauma symptoms and behavior problems. Cultural beliefs and their interaction with dual violence experiences play a significant role in young adults' trauma symptoms and behavior problems as well. Practice implications: The present findings underscore the need for interventions for young adults exposed to childhood dual violence. Moreover, the findings highlight the need for culturally sensitive interventions to address the cultural factor impact on young adults' trauma symptoms and behavior problems. (PsycINFO Database Record (c) 2013 APA, all rights reserved) (journal abstract)

SN - 0145-2134

AD - Shen, April Chiung-Tao: National Taiwan University, Department of Social Work, Taipei, Taiwan

ER -

TY - JOUR

ID - 590

T1 - Individual differences in children's risk perception and appraisals in outdoor play environments.

[References]

A1 - Little,Helen

Y1 - 2010///

N1 - Peer Reviewed Journal: 2010-26649-004

English

Journal; Peer Reviewed Journal

KW - PsycInfo

KW - Childhood Play Behavior

KW - Individual Differences

KW - Risk Perception

KW - SENSATION seeking

KW - Risk Taking

RP - NOT IN FILE

SP - 297

EP - 313

JA - International Journal of Early Years Education

VL - 18:

IS - 4

N2 - Child characteristics including age, gender, risk-taking behaviour and sensation seeking are thought to influence children's ability to appraise risks. The present study investigated children's risk perceptions and appraisals in the context of common outdoor physical play activities. Risk perceptions and appraisal of four- and five-year olds were assessed using a pictorial risk appraisal measure and through individual semi-structured interviews examining children's decision-making. Sensation seeking and risk-taking behaviour were assessed using self-and parent-report measures. Results revealed that the children were able to identify injury risk behaviours however differentiating the severity of the potential injury was less accurate. Furthermore, the children appeared to use these judgements in their play to inform their behaviour whilst using playground equipment. Whilst they actively sought out those activities that offered challenge and excitement, they were aware of their abilities and showed caution in engaging in activities that were beyond their current capabilities. The results have implications for the provision of calculated risk-taking in outdoor play and for adult responses to the risk-taking behaviour of children. (PsycINFO Database Record (c) 2013 APA, all rights reserved) (journal abstract)

SN - 0966-9760

AD - Little, Helen: Institute of Early Childhood, Macquarie University, Sydney, NSW, Australia Wyver,

Shirley: Institute of Early Childhood, Macquarie University, Sydney, NSW, Australia

ER -

TY - JOUR

ID - 591

T1 - High school students as therapeutic agents with young children. [References]

A1 - Jones,Leslie

Y1 - 2010///

N1 - Book: 2010-05340-021

English

Book; Edited Book

KW - PsycInfo

KW - Family Therapy

KW - Kindergarten Students

KW - Peer Counseling

KW - Peer Relations

KW - Play Therapy

KW - At Risk Populations

KW - Behavior Problems

KW - High School Students

KW - Leadership

KW - Preschool Students

KW - School Adjustment

KW - School Based Intervention

RP - NOT IN FILE

SP - 373

EP - 387

JF - Baggerly, Jennifer N [Ed]; Ray, Dee C [Ed]; Bratton, Sue C [Ed]

VL - :

IS - 2010

N2 - (from the chapter) This chapter examines whether the use of a filial therapy model adapted to train high school students in a peer assistance program in developmentally appropriate methods could enhance their skills when working with children. A pre-test-post-test control group design was used to measure the adjustment of pre-kindergarten and kindergarten children identified as at risk. The experimental group children received 20-minute structured play sessions for an average of 20 weeks over seven months. Play sessions were facilitated by 32 high school juniors and seniors in a Peer Assistance and Leadership (PALs) class trained in child-centered play therapy skills and procedures. Comparison group high school students were trained in traditional PALs curriculum during their class time. The students were assigned to treatment group by their classroom assignment. There were two regularly scheduled PALS classes in the participating school. One class was randomly drawn to participate in the experimental treatment, and the other class was drawn to participate in the control treatment. Children in the experimental group demonstrated a significant reduction in their total

behavior problems. Filial-trained PALSs students demonstrated a significant increase in empathy play behaviors and interactions during playtimes with children. The results of this study prove that using a filial therapy model to train high school students as therapeutic agents is effective with prekindergarten and kindergarten children experiencing school adjustment difficulties and suggest the use of a filial therapy training model as an effective method of training peer helpers. (PsycINFO Database Record (c) 2012 APA, all rights reserved)

AD - Jones, Leslie: Private Practice, Prosper, TX, US

ER -

TY - JOUR

ID - 592

T1 - Impact of school-based child-centered play therapy on academic achievement, self-concept, and teacher-child relationships. [References]

A1 - Blanco, Pedro J.

Y1 - 2010///

N1 - Book: 2010-05340-007

English

Book; Edited Book

KW - PsycInfo

KW - Academic Achievement

KW - Client Centered Therapy

KW - Play Therapy

KW - Self Concept

KW - Teacher Student Interaction

KW - At Risk Populations

KW - Childhood Development

KW - Mental Health Programs

KW - Schools

RP - NOT IN FILE

SP - 126

EP - 144

JF - Baggerly, Jennifer N [Ed]; Ray, Dee C [Ed]; Bratton, Sue C [Ed]

VL - :

IS - 2010

N2 - (from the chapter) This chapter discusses a study, the purpose of which was to concentrate improving academic progress by using a mental health program intended to address the developmental needs of children. Child-centered play therapy (CCPT) is one possibility for providing a mental health program in public schools. The study investigated the effectiveness of CCPT on at-risk first-grade students' academic achievement, self-concept, and student-teacher relationships. Specifically, the study examined the effect of CCPT on increasing the child's early achievement composite as measured by the Young Children's Achievement Test (YCAT), the global self-concept scale of the Pictorial Scale of Perceived Competence and Social Acceptance for Young Children (PSPCSAYC), and the total scale of the Student-Teacher Relationship Scale (STRS). (PsycINFO Database Record (c) 2012 APA, all rights reserved)

AD - Blanco, Pedro J.: Delta State University, Cleveland, MS, US

ER -

TY - JOUR

ID - 593

T1 - Child-centered play therapy research: The evidence base for effective practice. [References]

A1 - Baggerly, Jennifer N.

Y1 - 2010///

N1 - Book: 2010-05340-000

English

Book; Edited Book

(Created by PsycINFO) Foreword [by] Garry L. Landreth Preface About the editors Contributors Section I: Overview of play therapy research \* What the research shows about play therapy: Twenty-first century update / Dee C. Ray and Sue C. Bratton / 3-33 Section II: Research in play therapy \* Increased self-efficacy: One reason

for play therapy success / Marijane Fall / 37-50 \* The efficacy of intensive individual child-centered play therapy for chronically ill children / Elizabeth Murphy Jones and Kara Carnes-Holt / 51-67 \* Intensive sibling group play therapy with child witnesses of domestic violence / Ashley Tyndall-Lind / 69-83 \* Effects of postearthquake group play therapy with Chinese children / Yih-Jiun Shen / 85-103 \* Play therapy effect on relationship stress / Dee C. Ray and Natalya A. Edwards / 105-123 \* Impact of school-based child-centered play therapy on academic achievement, self-concept, and teacher-child relationships / Pedro J. Blanco / 126-144 \* Play therapy with children exhibiting ADHD / Dee C. Ray / 145-162 \* A school-based group activity therapy intervention with learning-disabled preadolescents exhibiting behavior problems / Jill Packman and Ireon Lebeauf / 163-176 \* School-based child-centered play therapy with Hispanic children / Yvonne Garza / 177-191 \* Effectiveness of child-centered play therapy for children referred for aggression / Brandy Schumann / 193-208 \* Effectiveness of child-centered play therapy and person-centered teacher consultation on ADHD: A single-case study design / April Schottelkorb / 209-230 \* Child-centered play therapy and child development: A single-case analysis / April Garofano-Brown / 231-248 \* Children's perceptions of play therapy / Eric J. Green / 249-263 Section III: Research in filial therapy \* Child parent relationship therapy: A review of controlled-outcome research / Sue C. Bratton, Garry L. Landreth and Yung-Wei Dennis Lin / 267-293 \* Filial therapy with parents of chronically ill children / Kristi Tew / 295-309 \* Filial therapy with Native Americans on the Flathead Reservation / Geri Glover / 311-321 \* Filial therapy with Chinese parents / Tom Yuen / 323-337 \* Child parent relationship therapy with African American parents / Angela I. Sheely-Moore / 339-353 \* Child Parent Relationship Therapy with Hispanic parents / Peggy Ceballos / 355-372 \* High school students as therapeutic agents with young children / Leslie Jones / 373-387 \* Filial therapy with teachers of deaf and hard of hearing preschool children / D. Michael Smith / 389-407 \* Child-centered kinder training for teachers of preschool children deemed at risk / Phyllis Post / 409-426 \* An early mental health intervention for disadvantaged preschool children / Mary O. Morrison and Wendy P. Helker / 427-446 \* A qualitative study of parents' perceptions of filial therapy in a public school / Yuehong Chen Foley / 447-464 Section IV: Future research directions for play therapy \* Evidence-based standards and tips for play therapy researchers / Jennifer N. Baggerly / 467-479 Author index Subject index

KW - PsycInfo

KW - Client Centered Therapy

KW - Evidence Based Practice

KW - Experimentation

KW - Play Therapy

KW - Chronic Illness

KW - Clinicians

KW - Domestic Violence

KW - Empirical Methods

KW - History

KW - Natural Disasters

KW - Witnesses

KW - Best Practices

RP - NOT IN FILE

SP - Hoboken, NJ, US

JF - (2010)

VL - Child-centered play therapy research: The evidence base for effective practice. xxiii, 502 pp. Hoboken, NJ, US: John Wiley & Sons Inc; US.

N2 - (from the jacket) This book offers mental health professionals, school district administrators, community agency administrators, judges, lawyers, child protection caseworkers, and medical professionals a comprehensive discussion of play therapy research studies. Guidance is provided on evidence-based methods, as well as on how future play therapy research should be conducted. Edited by experts in the field of play therapy, this compilation features contributions by child-centered play therapy researchers, with relevant discussion of: the history of play therapy research; a synopsis of current empirical support; and play therapy research on chronically ill children, child witnesses of domestic violence, and victims of natural disasters, among many other topics. With coverage of important practice guidelines, this book identifies the most prominent and current play therapy research studies, as well as research directions for clinicians to design evidence-based research studies of their own. (PsycINFO Database Record (c) 2012 APA, all rights reserved)

AD - Baggerly, Jennifer N.: University of South Florida, Tampa, FL, US Ray, Dee C.: Counseling Program, University of North Texas, Denton, TX, US Bratton, Sue C.: Center for Play Therapy, University of North Texas, Denton, TX, US

ER -

TY - JOUR

ID - 594

T1 - Emotion regulation, language ability, and the stability of preschool children's peer play behavior.

[References]

A1 - Cohen,Jeremy S; Mendez,Julia

Y1 - 2009///

N1 - Peer Reviewed Journal: 2009-24145-008

English

Journal; Peer Reviewed Journal

KW - PsycInfo

KW - Childhood Play Behavior

KW - Emotional Development

KW - Language Development

KW - Preschool Students

KW - Peer Relations

KW - Social Skills

KW - Vocabulary

RP - NOT IN FILE

SP - 1016

EP - 1037

JF - Early Education and Development

VL - 20:

IS - 6

N2 - Research Findings: This study examined the stability of preschoolers' peer play behavior across the school year and the relations between emotion regulation, receptive vocabulary, and the trajectory of social competence deficits. Participants were 331 preschool children attending Head Start; they were primarily African American and from a low-SES background. Peer play behavior was moderately stable from fall to spring. Analyses revealed that emotional lability in the fall was associated with consistently maladaptive and declining social competence. Furthermore, children who exhibited stable maladaptive behavior had lower receptive language skills and emotion regulation in the fall than children who exhibited consistently adaptive behavior. Preschool children with comorbid externalizing and internalizing behaviors during peer play were at the greatest risk for consistent peer play difficulties or declining social competence over the course of the year compared to their peers. Practice: The present study informs practices for identifying at-risk preschoolers shortly after entry into an early education experience. Moreover, the findings suggest that without effective interventions, those at-risk children are likely to exhibit consistently poor social competence over time. Implications for the use of early intervention and prevention targeting specific behavioral and peer problems are discussed. (PsycINFO Database Record (c) 2012 APA, all rights reserved) (journal abstract)

SN - 1040-9289

AD - Cohen, Jeremy S.: Department of Psychology, Temple University, Philadelphia, PA, US Mendez, Julia

L.: Department of Psychology, University of North Carolina at Greensboro, Greensboro, NC, US

ER -

TY - JOUR

ID - 596

T1 - Infant symbolic play as an early indicator of fetal alcohol-related deficit. [References]

A1 - Molteno,Christopher D.

Y1 - 2010///

N1 - Peer Reviewed Journal: 2011-06687-002

English

Journal; Peer Reviewed Journal

KW - PsycInfo

KW - Fetal Alcohol Syndrome

KW - Infant Development

KW - Prenatal Exposure

KW - Recreation

KW - Family Background

KW - Milieu Therapy

KW - Sociocultural Factors

RP - NOT IN FILE

SP - 586

EP - 607

JF - Infancy

VL - 15:

IS - 6

N2 - Infant symbolic play was examined in relation to prenatal alcohol exposure and socioenvironmental background and to predict which infants met criteria for fetal alcohol syndrome (FAS) at 5 years. A total of 107 Cape-Colored, South African infants born to heavy drinking mothers and abstainers/light drinkers were recruited prenatally. Complexity of play, sociodemographic and psychological correlates of maternal alcohol use, and quality of parenting were assessed at 13 months, and intelligence quotient and FAS diagnosis at 5 years. The effect of drinking on spontaneous play was not significant after control for social environment. In contrast, prenatal alcohol and quality of parenting related independently to elicited play. Elicited play predicted 5-year Digit Span and was poorer in infants subsequently diagnosed with FAS/ partial FAS and in nonsyndromal heavily exposed infants, compared with abstainers/light drinkers. Thus, symbolic play may provide an early indicator of risk for alcohol-related deficits. The independent effects of prenatal alcohol and quality of parenting suggest that infants whose symbolic play is adversely affected by alcohol exposure may benefit from stimulation from a responsive caregiver. (PsycINFO Database Record (c) 2012 APA, all rights reserved) (journal abstract)

SN - 1525-0008

AD - Molteno, Christopher D.: Department of Psychiatry and Mental Health, University of Cape Town, Faculty of Health Sciences, Cape Town, South Africa Jacobson, Sandra W.: Department of Psychiatry and Behavioral Neurosciences, Wayne State University School of Medicine, Detroit, MI, US Carter, R. Colin: Department of Pediatrics, Children's Hospital Boston, Boston, MA, US Jacobson, Joseph L.: Department of Psychiatry and Behavioral Neurosciences, Wayne State University School of Medicine, Detroit, MI, US

ER -

TY - JOUR

ID - 597

T1 - Cognitive correlates in toddlers born very low birth weight and full-term. [References]

A1 - Lowe, Jean

Y1 - 2010//

N1 - Peer Reviewed Journal: 2010-25362-026

English

Journal; Peer Reviewed Journal

KW - PsycInfo

KW - Birth Weight

KW - Cognitive Development

KW - Infant Development

KW - Mother Child Communication

KW - Premature Birth

RP - NOT IN FILE

SP - 629

EP - 634

JF - Infant Behavior &amp; Development

JA - Infant behav

VL - 33:

IS - 4

N2 - Understanding what contributes to children's cognitive development can improve our ability to identify those children at risk for later developmental disorders. We hypothesized that cognition would be more strongly associated with child and mother interaction variables such as communication, sensitivity and affect during play in contrast to medical variables in preterm children, and that these same variables would also be correlates of cognition in children born full-term. Cognition was measured by the Bayley Scales of Infant Development-II Mental Developmental Index and mother-toddler play interactions were coded with the Caregiver-Child Affect, Responsiveness and Engagement Scales (C-CARES) for child and mother affect, communication, and sensitivity in 40 very low birth weight (VLBW) and 54 full-term toddlers at 18-22 months of age, adjusted for gestational age. Two different multivariate models were identified that best predicted cognition in the two sets of toddlers. For the toddlers born VLBW, days on ventilation, maternal education and the three C-CARES Child Play scales (sensitivity, affect and communication) were the best predictors of cognition. In contrast, the multivariate model that best correlated with cognition for the children born full-term included the Maternal Communication scale of the C-CARES. The different multivariate models identified for toddlers born preterm compared to those born full-term emphasizes the importance of using identification and cognitive intervention techniques that are uniquely tailored for children born very low birth weight. Findings highlight the importance of investigating beyond more traditional measures of cognition by incorporating play-based socio-emotional measures. (PsycINFO Database Record (c) 2012 APA, all rights reserved) (journal abstract)

SN - 0163-6383

AD - Lowe, Jean: University of New Mexico Children's Hospital, Department of Pediatrics, Division of Neonatology, Albuquerque, NM, US Erickson, Sarah J.: University of New Mexico, Department of Psychology, Albuquerque, NM, US MacLean, Peggy: University of New Mexico, Department of Psychology, Albuquerque, NM, US

ER -

TY - JOUR

ID - 598

T1 - Obesity in early childhood and working in pre-school settings. [References]

A1 - de Silva-Sanigorski, Andrea M.

Y1 - 2010///

N1 - Book: 2010-10942-029

English

Book; Edited Book

KW - PsycInfo

KW - Childhood Development

KW - Health Promotion

KW - Obesity

KW - Prevention

KW - Weight Gain

KW - Critical Period

KW - Preschool Education

KW - Risk Factors

RP - NOT IN FILE

SP - 253

EP - 262

JF - Waters, Elizabeth [Ed]; Swinburn, Boyd [Ed]; Seidell, Jacob [Ed]; Uauy, Ricardo [Ed]

VL - :

IS - 2010

N2 - (from the chapter) This chapter examines several issues on obesity in early childhood that have direct practical relevance to supporting healthy weight gain in this critical period of life. The first fundamental issue for child health nursing practice is the definition of normal growth in early childhood, which leads directly into an examination of the assessment of at-risk growth patterns and other risk factors for later childhood (and adult) obesity. Appropriate feeding practices are fundamental to healthy weight gain in early childhood and these recommendations are reviewed as well as the importance of active play, motor skill development and reduced television viewing time. Patterns for all human behaviors are highly influenced by environments, and this is most true in the early childhood years. Thus, the many preschool settings outside the home environment are also

examined as opportunities for implementing the policies and practices needed to promote healthy eating and active play. (PsycINFO Database Record (c) 2012 APA, all rights reserved)

AD - de Silva-Sanigorski, Andrea M.: WHO Collaborating Centre for Obesity Prevention, Deakin University, Geelong, VIC, Australia Corvalan, Camila: School of Public Health, Faculty of Medicine, University of Chile, Santiago, Chile Uauy, Ricardo: London School of Hygiene and Tropical Medicine, London, England  
ER -

TY - JOUR

ID - 599

T1 - Infant physiological response to the still-face paradigm: Contributions of maternal sensitivity and infants' early regulatory behavior. [References]

A1 - Conradt, Elisabeth

Y1 - 2010///

N1 - Peer Reviewed Journal: 2010-10509-002

English

Journal; Peer Reviewed Journal

KW - PsycInfo

KW - Facial Expressions

KW - Mother Child Relations

KW - Physiological Arousal

KW - Self Regulation

KW - Sensitivity (Personality)

KW - Emotional Regulation

KW - Environmental Effects

KW - Infant Development

KW - Poverty

KW - Risk Factors

KW - Social Stress

RP - NOT IN FILE

SP - 251

EP - 265

JF - Infant Behavior & Development

JA - Infant behav

VL - 33:

IS - 3

N2 - The current study examined the independent and additive contributions of maternal sensitivity measured prior to and following a social stressor, and infant behaviors to infants' physiological response to the still-face paradigm (SFP) in a sample characterized by poverty-related environmental risk. Ninety-one mother/infant dyads participated in the SFP when their infants were 5 months old. Maternal sensitivity was coded during the play and reunion episodes. Infant behaviors were coded during the reunion episode of the SFP while measures of heart rate (HR) and Respiratory Sinus Arrhythmia (RSA) were collected from the infants at baseline and across the SFP. Maternal sensitivity during the reunion episode predicted infants' biobehavioral reactivity and regulation, over and above maternal sensitivity during the play episode. Infants' HR decreased, and RSA increased, with greater levels of maternal sensitivity during the reunion episode. Infants also exhibited greater attentional engagement and fewer resistant behaviors with greater levels of maternal sensitivity during the reunion episode. Finally, infant behaviors predicted change in HR and RSA from the still-face to the reunion episode, above and beyond that of maternal behaviors. These findings further our understanding of the dyadic basis for the development of emotion regulation in infancy. (PsycINFO Database Record (c) 2012 APA, all rights reserved) (journal abstract)

SN - 0163-6383

AD - Conradt, Elisabeth: Psychology Department, University of Oregon, Eugene, OR, US Ablow, Jennifer: Psychology Department, University of Oregon, Eugene, OR, US

ER -

TY - JOUR

ID - 600



T1 - In reply: "Nutritional-assistance programs play a critical role in reducing food insecurity." [References]

A1 - Melchior, Maria; Caspi, Avshalom; Belsky, Daniel; Moffitt, Terrie

Y1 - 2010///

N1 - Peer Reviewed Journal: 2011-14269-035

English

Journal; Peer Reviewed Journal

KW - PsycInfo

KW - Food

KW - Lower Income Level

KW - Mental Health

KW - Nutritional Deficiencies

KW - Socioeconomic Status

KW - Alcoholism

KW - At Risk Populations

KW - Domestic Violence

KW - Drug Abuse

KW - Family

KW - Major Depression

KW - Mothers

RP - NOT IN FILE

SP - e1267

EP - e1268

JA - Pediatrics

VL - 125:

IS - 5

N2 - Reply by the current authors to the comments made by Deborah A. Frank et al. (see record 2011-14269-034) on the original article (see record 2010-00879-002). Frank et al. point out that food assistance programs are not sufficiently accessible to eligible families and argue that such programs are key in eliminating food insecurity. We agree that programs that provide income supports or food assistance to deprived families should be strengthened. However, the results of our study indicate that these interventions may not reach children of families in which the mother suffers from mental illness. Mothers with mental health problems may not apply for assistance, may do so incorrectly, or may struggle to translate assistance into a healthy diet for their children. Safety net policies that protect children from food insecurity depend on parents, and in many cases mothers, to seek out resources and to effectively pass them on to their children. Mothers, therefore, are the key conduit link between government policies and children, and mental health problems can weaken this link. If mothers' mental health is neglected, then there will always be a substantial segment of the population of poor children whose nutritional needs are left unmet by even the best government-assistance programs. Why not do whatever it takes to enable every child to benefit? (PsycINFO Database Record (c) 2012 APA, all rights reserved)

SN - 0031-4005

AD - Melchior, Maria: Inserm U1018, Centre for Research in Epidemiology and Population Health, Epidemiology of Occupational and Social Determinants of Health, Villejuif, France Caspi, Avshalom: Department of Psychology, Duke University, Durham, NC, US Belsky, Daniel: Department of Health Policy and Management, Gillings School of Global Public Health, University of North Carolina, Chapel Hill, NC, US Moffitt, Terrie E.: Department of Psychology, Duke University, Durham, NC, US

ER -

TY - JOUR

ID - 601

T1 - The influence of parent attributional style and family structure on adolescent adjustment to chronic illness

A1 - Guion, Kimberly

Y1 - 2010///

N1 - Dissertation Abstract: 2010-99240-423

English

Dissertation Abstract

KW - PsycInfo

KW - Attribution

KW - Chronic Illness

KW - Coping Behavior

KW - Family Structure

KW - Parents

KW - Adjustment

KW - Chronicity (Disorders)

RP - NOT IN FILE

SP - 3934

JF - Dissertation Abstracts International: Section B: The Sciences and Engineering

VL - 71:

IS - 6-B

N2 - Adolescents diagnosed with a variety of chronic diseases are at increased risk for developing internalizing and externalizing problems. Various family factors may play an important role in adolescent adjustment, particularly in the chronic illness population given the important role that family members play in medical care and coping. Previous literature has demonstrated the separate contributions of parental attributions and adolescent attributions to adolescent adjustment. However, it is unknown whether parental coping affects adolescent mental health outcomes directly or indirectly by influencing children's attributional style. Further, there is a dearth of research examining the role of family structure in coping in pediatric populations. The current project examined the relationships between parental coping style and family structure to adolescent adjustment. Adolescents (N=123; M= 14.4 yrs.) diagnosed with cystic fibrosis, diabetes, or muscular dystrophy and a caregiver completed measures of attributional style and adolescent adjustment. Mediation analyses indicated that adolescent attributions did not mediate the relationship between parent attributions and adolescent adjustment. However, both adolescent and parent attributions predicted teen externalizing problems, and adolescent attributions predicted depression and anxiety. Regression analyses indicated the number of active caregivers reported, but not family structure, was related to adolescent externalizing problems. Age and parental distress were also significant predictors of adolescent outcomes. These data represent a novel look at complex relations between family factors and adolescent adjustment. Results suggest that a key entry point for intervention may relate to parental mental health and adolescent coping. (PsycINFO Database Record (c) 2012 APA, all rights reserved)

SN - 0419-4217

AD - Guion, Kimberly: U Alabama at Birmingham, US

ER -

TY - JOUR

ID - 602

T1 - Should children with Down's syndrome who have asymptomatic atlantoaxial instability avoid horse riding? [References]

A1 - Rao,Srinidhi J.

Y1 - 2010///

N1 - Peer Reviewed Journal: 2011-00914-016

English

Journal; Peer Reviewed Journal

KW - PsycInfo

KW - Down's Syndrome

KW - epidemiology

KW - Physical Activity

KW - Spinal Cord

KW - Horses

KW - Schools

RP - NOT IN FILE

SP - 774

EP - 776

JF - Journal of Paediatrics and Child Health

VL - 46:

IS - 12

N2 - A 5-year-old girl with Down's syndrome wishes to take horse riding lessons and was asked by the riding school to be screened for atlantoaxial instability (AAI). AAI is a known association with Down's syndrome with a prevalence of 10-30% depending on the criteria used to define it. In children with Down's syndrome and asymptomatic AAI, do strenuous physical activities like horse riding increase the risk of symptomatic AAI or spinal cord compression? We searched Medline from 1950 to January week 2 2010 for the key words: (Atlantoaxial instability OR Atlantoaxial joint) AND Down Syndrome, and limited the studies to children 0-18 years and written in the English language. A total of 86 articles were found, of which four were relevant. Among the relevant articles identified by the search, there was one randomised controlled trial and three observational studies. The paper that best answers the question was by Cremers et al. While the authors conclude that it is safe for children with Down's syndrome and AAI to play risky sport, we do not think that the evidence presented in the study is sufficient to reach that conclusion. Hence, we would advise the parents of our patient with an atlanto dens interval of 6.5 mm that there is insufficient information to determine whether horse riding may increase the risk for symptomatic AAI in her situation. The decision to participate in horse riding is to be based on the balance of the risks of suffering the rare chance of spinal cord compression to the benefits of engaging in a rewarding outdoor activity. (PsycINFO Database Record (c) 2012 APA, all rights reserved)

SN - 1034-4810

AD - Rao, Srinidhi J. V.: Department of Paediatrics, Children's Hospital at Westmead, Westmead, NSW, Australia Caldwell, Patrina: Discipline of Paediatrics and Child Health, University of Sydney, Sydney, NSW, Australia

ER -

TY - JOUR

ID - 603

T1 - Incorporating divergent thinking training into play interventions for preschool children with developmental risk factors. [References]

A1 - Mallory, Jessica M.

Y1 - 2010//

N1 - Peer Reviewed Journal: 2010-23177-005

English

Journal; Peer Reviewed Journal

KW - PsycInfo

KW - Cognitive Development

KW - Divergent Thinking

KW - Preschool Students

KW - Recreation

KW - School Based Intervention

KW - Risk Factors

RP - NOT IN FILE

SP - 57

EP - 71

JF - The International Journal of Creativity & Problem Solving

VL - 20:

IS - 2

N2 - Cognitive development and play development are mutually reinforcing. The present study measured the effect of an intervention intended to address both play skills and cognitive skills directly by incorporating divergent thinking prompts into a play-based intervention. The play of six at-risk children was observed and video recorded during independent pretend play. Qualitative and quantitative aspects of this play were recorded. Three at-risk children participated in six week divergent thinking intervention, while three comparison children participated in the general preschool curriculum. Children's play was observed and recorded pre- and postintervention. Results indicated that children who participated in the intervention did improve on measures of play quality, quantity, or both more than children who did not participate in the intervention. Implications for educators are discussed. (PsycINFO Database Record (c) 2012 APA, all rights reserved) (journal abstract)

SN - 1598-723X

AD - Mallory, Jessica M.: University of Nebraska at Omaha, Omaha, NE, US Kelly-Vance, Lisa: University of Nebraska at Omaha, Omaha, NE, US Ryalls, Brigitte: University of Nebraska at Omaha, Omaha, NE, US

ER -

TY - JOUR

ID - 604

T1 - Temperament and maternal emotion socialization beliefs as predictors of early childhood social behavior in the laboratory and classroom. [References]

A1 - Root,Amy Kennedy; Stifter,Cynthia

Y1 - 2010///

N1 - Peer Reviewed Journal: 2010-24343-001

English

Journal; Peer Reviewed Journal

KW - PsycInfo

KW - Early Childhood Development

KW - Psychosocial Development

KW - Risk Factors

KW - Social Behavior

KW - SOCIALIZATION

KW - Classrooms

KW - Emotional States

KW - Mother Child Relations

RP - NOT IN FILE

SP - 241

EP - 257

JF - Parenting: Science and Practice

VL - 10:

IS - 4

N2 - Objective: The authors examined the roles of children's approach behavior and maternal emotion socialization practices in the development of social behavior in unfamiliar and familiar contexts from preschool to early childhood years. Design: At 4.5 years of age, children were observed, and an assessment of approach behavior was obtained; at this time, mothers reported about their emotion socialization beliefs. Two years later, children returned to the laboratory to participate in a peer play paradigm. When children were 7 years of age, teachers completed a questionnaire about children's social behaviors in the classroom. Results: Mothers' emotion socialization beliefs contribute to the developmental outcomes of approach behavior. For instance, observations of approach behaviors predicted a greater proportion of group play in the unfamiliar peer group when mothers reported highly supportive emotion socialization beliefs. Conclusion: Mothers' emotion socialization beliefs appear to play an important role in modifying the developmental course of approach behavior during early childhood. (PsycINFO Database Record (c) 2012 APA, all rights reserved) (journal abstract)

SN - 1529-5192

AD - Root, Amy Kennedy: Department of Technology, Learning and Culture, Morgantown, WV, US Stifter, Cynthia: Pennsylvania State University, PA, US

ER -

TY - JOUR

ID - 605

T1 - Review of Playing outdoors, spaces and places, risk and challenge. [References]

A1 - Garrick,Ros

Y1 - 2010///

N1 - Peer Reviewed Journal: 2010-21379-012

English

Journal; Peer Reviewed Journal

KW - PsycInfo

KW - Childhood Play Behavior

KW - Early Childhood Development

KW - Learning

KW - Social Environments

RP - NOT IN FILE

SP - 283

EP - 285

JF - Early Years: An International Journal of Research and Development

VL - 30:

IS - 3

N2 - Reviews the book, *Playing outdoors, spaces and places, risk and challenge* by Helen Tovey (2007). This book has been written as part of a series of books in the 'Debating Play' series, edited by Tina Bruce. The series sets out to promote critical reflection on young children's play across a wide range of contexts, and to support those working with children to provide play opportunities with rich learning potential. Tovey's book focuses on the opportunities for outdoor play in settings for young children, primarily children from one to five years, in the UK. The book begins, as some similar books have done, with an evocation of the rich sensory experience of outdoor play in a previous era when free play in natural environments was a relatively common experience. Tovey then considers some broad issues for young children today that have led to diminished opportunities for outdoor play, and she examines the unintended, negative consequences that flow from this. This challenge leads to the heart of the book and to the chapter where Tovey sets out what she sees as the key design principles of outdoor spaces and places. Like the rest of the book, this chapter is richly informed by a range of research, drawing for example on the research of landscape architects, sociologists and geographers as well as educationists. (PsycINFO Database Record (c) 2012 APA, all rights reserved)

SN - 0957-5146

AD - Garrick, Ros: Sheffield Hallam University, Sheffield, United Kingdom

ER -

TY - JOUR

ID - 606

T1 - The effects of information sharing and modeling on teacher talk and children's language during dramatic play

A1 - Combs, Sandra Genevieve Patterson

Y1 - 2010//

N1 - Dissertation Abstract: 2010-99040-016

English

Dissertation Abstract

KW - PsycInfo

KW - Childhood Development

KW - Language Development

KW - Project Head Start

KW - Simulation

KW - Teachers

KW - Language

RP - NOT IN FILE

SP - 4800

JF - Dissertation Abstracts International: Section B: The Sciences and Engineering

VL - 70:

IS - 8-B

N2 - The goal of preschool is to prepare children for later schooling. In the case of Head Start, the goal is, more specifically, to prepare children at-risk for later language and academic difficulties due to poverty for school. Children with strong language skills enter school able to handle the input from teachers and are more likely to do well in school. The quality of language interactions a teacher and child have in preschool is important to Head Start children. Teachers can have a positive impact on the language development of preschool children, thereby increasing these children's chances of later academic success. One possible means of supporting children in Head Start is supporting teachers in development and use of effective language enhancement strategies. Speech-language pathologists (SLPs) have knowledge of effective strategies for increasing the language skills of young children. It would therefore be helpful for SLPs to collaborate in trainings with teachers in Head Start. This project was a quasi-experimental study of an SLP professional development program involving teachers, children and two SLPs in two urban Head Start centers. This study examined the changes in teachers' use of language enhancement strategies following ongoing, in class information sharing and modeling by an SLP during play in the dramatic play center. This study also examined the subsequent changes

in the language of specific children in these classrooms following their teachers' participation in the program. The specific aims were to determine: (1) if teachers' use of language enhancement strategies during play in a dramatic play center increased immediately following ongoing, information sharing and modeling by an SLP, (2) if teachers continued to use the strategies longitudinally, (3) if there was a difference between the number of strategies used by the experimental group and control group at baseline and final taping, (4) if children's language complexity changed as a result of changes in their teachers' language use, and (5) if there was a difference between the language complexity of the children in the experimental group and control group at baseline and final taping. The results of this study indicated that teachers significantly increased the number of open-ended questions and expansions/extensions immediately following information sharing and modeling by the SLP. The teachers did not significantly increase the number of targeted and specific vocabulary they used immediately following the modeling by the SLP. The teachers did not demonstrate maintenance of changes for either variable at final follow-up taping. The children's language complexity was not significantly different on any of the measures throughout the project. One of the implications of this project is that SLPs may consider using short informational meetings and modeling of specific targeted language strategies as a means of supporting teachers in providing a language rich classroom. (PsycINFO Database Record (c) 2012 APA, all rights reserved)

SN - 0419-4217

AD - Combs, Sandra Genevieve Patterson: U Cincinnati, US

ER -

TY - JOUR

ID - 607

T1 - Case study: Parent-implemented prelinguistic milieu teaching with a high risk dyad. [References]

A1 - McCathren, Rebecca B.

Y1 - 2010///

N1 - Peer Reviewed Journal: 2010-16284-005

English

Journal; Peer Reviewed Journal

KW - PsycInfo

KW - Developmental Disabilities

KW - Linguistics

KW - Parents

KW - Dyads

KW - Intentional Learning

KW - Interpersonal Communication

KW - Poverty

KW - Teaching

RP - NOT IN FILE

SP - 243

EP - 252

JF - Communication Disorders Quarterly

VL - 31:

IS - 4

N2 - The purpose of this study was twofold. The first purpose was to determine if a mother with mild developmental disabilities living in poverty was able to implement Prelinguistic Milieu Teaching (PMT) strategies. The strategies included following the child's lead, arranging the environment to increase opportunities for communication, imitating the child's play and communication behaviors, modeling play and communication, and using words to map the child's experience and actions. The second purpose was to see if using these strategies resulted in increased intentional communication in her daughter. Intentional communication is when the young child coordinates the use of eye gaze, vocalizations, and/or gestures to achieve a particular communication outcome. The child is demonstrating intentional communication when she persistently alternates gaze between the adult and the object or event of interest or includes attention to both the adult and object in an interaction. For example, a child might reach toward an out-of-reach toy and look back and forth between the toy and the parent, communicating that she wants her parent to get the toy for her. The results indicated that the mother was able to implement the PMT strategies, and the use of these strategies increased her daughter's intentional communication. (PsycINFO Database Record (c) 2012 APA, all rights reserved) (journal abstract)

SN - 1525-7401

AD - McCathren, Rebecca B.: University of Missouri-Columbia, Columbia, MO, US

ER -

TY - JOUR

ID - 608

T1 - An activating mechanism of aggressive behaviour in disorganised attachment: A moment-to-moment case analysis of a three-year-old. [References]

A1 - Kim,Eun Young

Y1 - 2010///

N1 - Peer Reviewed Journal: 2010-15394-005

English

Journal; Peer Reviewed Journal

KW - PsycInfo

KW - Aggressive Behavior

KW - Attachment Behavior

KW - Cognitive Ability

KW - Risk Factors

KW - Therapeutic Processes

RP - NOT IN FILE

SP - 152

EP - 167

JF - Journal of Child Psychotherapy

VL - 36:

IS - 2

N2 - This study examines an activating mechanism of aggressive behaviour in young children. Many studies on attachment theories have indicated disorganised attachment as a significant risk factor for externalising problems and have explained the aetiology of disorganised attachment in terms of deficits in affect, behaviour and cognitive functions from a traumatic or inconsistent environment. Via the moment-to-moment analysis of the play therapy process with a three-year-old, this paper attempts to identify how these emotional, behavioural and cognitive factors interact in actual situations and can lead to an observable behaviour: aggressive behaviour. The findings from this study indicate that the child with disorganised attachment was going through a dual process, one with her therapist and the other with her internalised caregivers. When anxiety and an ambiguous social cue from an unpredictable situation were added to the child's repetition of previous attachment experience, this 'click' lowered the threshold of regulation of affect, behaviour and cognition. The child turned to disorganised and aggressive behaviour, relying on her physiological signals regarding the perceived threat. Finally, this paper describes how these difficulties can be channelled by symbolic play via displacement and containment. (PsycINFO Database Record (c) 2012 APA, all rights reserved) (journal abstract)

SN - 0075-417X

AD - Kim, Eun Young: Portia Bell Hume Center, Fremont, CA, US

ER -

TY - JOUR

ID - 609

T1 - Assessment and diagnosis of autism and spectrum disorders in children. [References]

A1 - Rojahn,Johannes

Y1 - 2010///

N1 - Peer Reviewed Journal: 2010-13545-001

English

Journal; Peer Reviewed Journal

KW - PsycInfo

KW - Adaptive Behavior

KW - Autism

KW - Comorbidity

KW - Diagnosis

KW - Measurement

RP - NOT IN FILE

SP - 313

EP - 315

JF - Journal of Developmental and Physical Disabilities

VL - 22:

IS - 4

N2 - This special issue of the Journal of Developmental and Physical Disabilities, which includes both comprehensive review papers as well as data based papers can be grouped into three categories: (1) identification and assessment of ASD core symptoms, (2) diagnosis and assessment of comorbidity in children with ASD, and (3) assessment of adaptive behavior (play skills and verbalizations) in children with ASD. In light of the stunning increase in reported prevalence rates in most countries the authors of the review paper conclude the most widely used and intensively scrutinized measures at present (ADI-R, ADOS, CHAT and its variants, and the BISCUIT, Social and Communication Questionnaire). Three papers of this Special Issue focus on the assessment of concurrent behavioral and psychiatric conditions in children with ASD. These are Validity of Comorbid Psychiatric Disorders in Youngsters with Autism Spectrum Disorders, Emergent Comorbidity in At Risk Children with and without Autism Spectrum Disorder-A Cross-Sectional Study, and Assessment of Feeding Problems in Children with Autism Spectrum Disorders. Last paper presents an assessment method for play skills and verbalizations in a study that explored the efficacy of video modeling for teaching play skills to two four-year-old boys with ASD. (PsycINFO Database Record (c) 2012 APA, all rights reserved)

SN - 1056-263X

AD - Rojahn, Johannes: George Mason University, Fairfax, VA, US Matson, Johnny L.: Louisiana State University, Baton Rouge, LA, US

ER -

TY - JOUR

ID - 610

T1 - Temperament at 5 years of age predicts amygdala and orbitofrontal volume in the right hemisphere in adolescence. [References]

A1 - Hill, Shirley Y.

Y1 - 2010///

N1 - Peer Reviewed Journal: 2010-06509-005

English

Journal; Peer Reviewed Journal

KW - PsycInfo

KW - Amygdala

KW - Brain Size

KW - Inhibition (Personality)

KW - Personality

KW - Prefrontal Cortex

KW - Adolescent Development

KW - Childhood Development

KW - Magnetic Resonance Imaging

KW - Right Hemisphere

RP - NOT IN FILE

SP - 14

EP - 21

JF - Psychiatry Research: Neuroimaging

VL - 182:

IS - 1

N2 - It was of interest to determine if hemispheric differences in orbitofrontal cortex (OFC) volume would be related to behavioral inhibition observed in a peer-play setting. Magnetic resonance imaging (MRI) was carried out in 23 individuals (19 males and 4 females) at an average age of 14.87 +/- 1.14 years who were either at high or low risk for alcohol dependence. All subjects had previously been evaluated in a preschool peer play paradigm (5.03 +/- 0.78 years) assessing behavioral inhibition. Region of interest measures were traced for the OFC and the amygdala, and confirmed with voxel based morphometry. Behavioral inhibition, a behavioral tendency that often occurs in a novel setting in reaction to strangers, includes the following: greater time spent



next to the mother, greater time staring at another child, and longer latency to begin play with another child. A significant relationship was seen between greater right OFC volume and indicators of behavioral inhibition including greater time spent proximal to their mother and greater time staring at the other child. Also, larger amygdala volume was associated with more time spent proximal to the mother. Behavioral control, including both over- and under-control, is likely to be subserved by neural circuitry associated with emotion regulation including the right OFC and the amygdala. (PsycINFO Database Record (c) 2012 APA, all rights reserved)

(journal abstract)

SN - 0925-4927

AD - Hill, Shirley Y.: Department of Psychiatry, University of Pittsburgh School of Medicine, Pittsburgh, PA, US

Tessner, Kevin: Department of Psychiatry, University of Pittsburgh School of Medicine, Pittsburgh, PA, US

Wang, Shuhui: Department of Psychiatry, University of Pittsburgh School of Medicine, Pittsburgh, PA, US

Carter, Howard: Department of Psychiatry, University of Pittsburgh School of Medicine, Pittsburgh, PA, US

McDermott, Michael: Department of Psychiatry, University of Pittsburgh School of Medicine, Pittsburgh, PA, US

US

ER -

TY - JOUR

ID - 611

T1 - Family-focused trauma intervention: Using metaphor and play with victims of abuse and neglect.

[References]

A1 - Pernicano,Pat

Y1 - 2010///

N1 - Book: 2010-06089-000

English

Book; Authored Book

(Created by PsycINFO) (Abbreviated) Acknowledgments Introduction Impact of trauma and overview of treatment Establishing appropriate roles and boundaries in families The fight of fight or flight: Self-control and modulation of affect Reducing hyperactivity and agitation Flight: Avoidance, withdrawal, and dissociation Reducing worry, fear, and anxiety Disrupted attachment: Coping with loss and renewing trust Changing depressed mood Empathy: Caring for yourself and others Responsibility and accountability Safety and protection The family journey: Pathways to change Coming to terms with out-of-home care Self-acceptance and hope Appendix: Squiggles stories References Index About the Author

KW - PsycInfo

KW - Child Abuse

KW - Child Neglect

KW - Family Intervention

KW - Trauma

KW - Victimization

KW - At Risk Populations

KW - Attachment Behavior

KW - Relapse (Disorders)

KW - Transgenerational Patterns

RP - NOT IN FILE

SP - Lanham, MD, US

JF - (2010)

VL - Family-focused trauma intervention: Using metaphor and play with victims of abuse and neglect. xi, 199 pp. Lanham, MD, US: Jason Aronson; US.

N2 - (from the cover) Treatment of abuse and neglect needs to be family-focused in order to reduce troubling symptoms, address family risk and relapse potential, treat cross-generational patterns, and remediate attachment deficits. Family-Focused Trauma Intervention translates issues central to abuse and neglect recovery into metaphorical stories and family-based interventions. Each chapter provides a summary of an issue or theme; one or more pertinent stories; and examples of parallel family, group, and individual interventions. These stories and family-focused interventions, which may be used within any theoretical framework, provide a wide variety of practitioners with a needed bridge between theory and practice. (PsycINFO Database Record (c) 2012 APA, all rights reserved)

AD - Pernicano, Pat: Providence Self Sufficiency Ministries, Georgetown, IN, US

ER -

TY - JOUR

ID - 612

T1 - Maternal anxiety, mother-infant interactions, and infants' response to challenge. [References]

A1 - Kaitz,Marsha; Maytal,Hilla Rubin; Devor,Noa; Bergman,Liat; Mankuta,David

Y1 - 2010///

N1 - Peer Reviewed Journal: 2010-05773-004

English

Journal; Peer Reviewed Journal

KW - PsycInfo

KW - Anxiety

KW - Emotional Regulation

KW - Mother Child Relations

KW - Stress

KW - Infant Development

KW - Mothers

RP - NOT IN FILE

SP - 136

EP - 148

JF - Infant Behavior & Development

JA - Infant behav

VL - 33:

IS - 2

N2 - Children of anxious mothers are at risk for social-emotional difficulties and disturbed, early interactions with their mother may account for some of the risk. This study evaluated the association between maternal anxiety, features of mother-infant interactions, and infants' emotion regulation during stressful situations (still-face, play with a stranger). Thirty-four anxiety-disordered mothers of 6-month-old infants and 59 typical dyads comprised the sample. Dyads were filmed during free play, teaching, care giving, and face-to-face play; and monadic (e.g., maternal sensitivity, infant affect) and dyadic measures (e.g., synchrony) were derived by global or time-event coding of the films. Results indicate that, compared to controls, more anxious mothers showed exaggerated behavior with their infant during free play and teaching, and infants of anxious mothers were less likely to show negative affect during the still-face and stranger challenges. We conclude that anxious maternal behavior reflects the hyperarousal that is characteristic of most anxiety disorders; and infants of anxious mothers and controls show differences in the manner in which they cope with social challenges. (PsycINFO Database Record (c) 2012 APA, all rights reserved) (journal abstract)

SN - 0163-6383

AD - Kaitz, Marsha: Department of Psychology, Hebrew University, Jerusalem, Israel Maytal, Hilla Rubin: Department of Psychology, Hebrew University, Jerusalem, Israel Devor, Noa: Department of Psychology, Hebrew University, Jerusalem, Israel Bergman, Liat: Department of Psychology, Hebrew University, Jerusalem, Israel Mankuta, David: Hadassah Hospital-Hebrew University Medical School, Jerusalem, Israel

ER -

TY - JOUR

ID - 613

T1 - Problematic dyadic interaction among toddlers and their polydrug-cocaine-using mothers. [References]

A1 - Molitor,Adriana

Y1 - 2010///

N1 - Peer Reviewed Journal: 2010-05689-001

English

Journal; Peer Reviewed Journal

KW - PsycInfo

KW - Cocaine

KW - Dyads

KW - Mother Child Relations

KW - Mothers

KW - Polydrug Abuse

KW - Early Childhood Development

KW - Social Interaction

RP - NOT IN FILE

SP - 121

EP - 140

JF - Infant Mental Health Journal

VL - 31:

IS - 2

N2 - Dyadic interactions between 84 at-risk toddlers and their nondrug-, polydrug-non-cocaine-, or polydrug-cocaine-using mothers were examined during unstructured play. Coded videotaped behaviors revealed two maternal constructs (interactive competence, maladaptive engagement) and three toddler constructs (responsiveness, active positive initiation, play). Cocaine-using mothers displayed more maladaptive engagement than did prenatal nondrug users; however, poorer interactive competence further distinguished them from polydrug-but-noncocaine users. Toddlers of cocaine-using mothers displayed less responsiveness and positive initiation than non-drug-group peers; however, these behaviors did not reliably differ from polydrug-non-cocaine counterparts. Play interest remained relatively similar across groups. Results suggest that difficulties in social interaction appear to continue among cocaine-using mothers during dyadic exchanges with their offspring in the second year; however, toddler deficits do not appear to be greater than those experienced by polydrug-non-cocaine counterparts. (PsycINFO Database Record (c) 2012 APA, all rights reserved) (journal abstract)

SN - 0163-9641

AD - Molitor, Adriana: University of San Diego, San Diego, CA, US Mayes, Linda C.: Yale University Child Study Center, New Haven, CT, US

ER -

TY - JOUR

ID - 614

T1 - Play therapy for anger management in the schools. [References]

A1 - Fischetti, Barbara A.

Y1 - 2010///

N1 - Book: 2010-04666-014

English

Book; Edited Book

KW - PsycInfo

KW - Anger Control

KW - Play Therapy

KW - Psychotherapeutic Techniques

KW - School Based Intervention

KW - Group Counseling

KW - Individual Psychotherapy

RP - NOT IN FILE

SP - 283

EP - 305

JF - Drewes, Athena A [Ed]; Schaefer, Charles E [Ed]

VL - :

IS - 2010

N2 - (from the chapter) This chapter reviewed play therapy techniques and approaches useful for anger management issues. Individual counseling techniques suggested for therapeutic intervention included client-centered play therapy, release play therapy, cognitive-behavioral play therapy, and developing an individual treatment approach incorporating play therapy techniques based on individual student treatment goals. Group counseling techniques included client-centered play therapy, cognitive-behavioral play therapy, structured social games and adventure play, therapeutic games, and the use of specific programs designed to ameliorate anger management difficulties that incorporate play techniques. A prescriptive approach to play therapy was recommended for addressing a student's needs specific to anger management difficulties. Interventions may include individual play therapy, group play therapy, and family counseling. Additionally, special play sessions

between parent and child were discussed to assist with anger management difficulties at home. Specific case examples were shared to illustrate the play techniques. Finally, specific play therapy techniques were identified for potential inclusion in a treatment program. (PsycINFO Database Record (c) 2012 APA, all rights reserved)

AD - Fischetti, Barbara A.: Westport Public Schools, Westport, CT, US

ER -

TY - JOUR

ID - 615

T1 - Play therapy for preschool children. [References]

A1 - Schaefer, Charles E [Ed]

Y1 - 2010//

N1 - Book: 2009-08925-000

English

Book; Edited Book

(Created by PsycINFO) Contributors Introduction I. Play-based prevention programs \* Clinical and developmental issues in psychotherapy with preschool children: Laying the groundwork for play therapy / Julie Blundon Nash and Charles E. Schaefer / 15-28 \* Evidence supporting the benefit of play for mild to moderate behavior problems of preschool children / Charles E. Schaefer / 31-45 \* Play therapy for insecurely attached preschool children / Helen E. Benedict and Diana Schofield / 47-66 II. Play interventions for internalizing disorders \* Posttraumatic parenting: A parent-child dyadic treatment for young children's posttraumatic adjustment / Janine Shelby, Claudia Avina, and Heather Warnick / 69-87 \* Filial play therapy for grieving preschool children / Hilda R. Glazer / 89-105 \* Strategic play therapy techniques for anxious preschoolers / Paris Goodyear-Brown / 107-129 \* Use of play in child-parent psychotherapy with preschoolers traumatized by domestic violence / Manuela A. Diaz and Alicia F. Lieberman / 131-156 \* Cognitive-behavioral play therapy for preschoolers: Integrating play and cognitive-behavioral interventions / Susan M. Knell and Meena Dasari / 157-178 III. Play interventions for externalizing disorders \* Role of sociodramatic play in promoting self-regulation / Katherine A. Gioia and Renee M. Tobin / 181-198 \* Parent-child interaction therapy / Corissa L. Callahan, Monica L. Stevens, and Sheila Eyberg / 199-221 \* Jungian sandplay therapy for preschoolers with disruptive behavior problems / Eric J. Green and Kristi Gibbs / 223-244 \* Parents, teachers, and therapists using child-directed play therapy and coaching skills to promote children's social and emotional competence and build positive relationships / Carolyn Webster-Stratton and M. Jamila Reid / 245-273 IV. Play interventions for developmental disorders \* From novice to expert: Guiding children on the autism spectrum in integrated play groups / David Neufeld and Pamela Wolfberg / 277-299 \* Teaching social skills to developmentally delayed preschoolers / Johnny L. Matson and Jill C. Fodstad / 301-322 Index About the editor

KW - PsycInfo

KW - At Risk Populations

KW - Disorders

KW - Play Therapy

KW - Prevention

KW - Developmental Disabilities

KW - Mental Disorders

RP - NOT IN FILE

SP - Washington, DC, US

JF - (2010)

VL - Play therapy for preschool children. x, 333 pp. Washington, DC, US: American Psychological Association; US.

N2 - (from the jacket) Play Therapy for Preschool Children is a comprehensive sourcebook of play interventions for preventing and resolving the most common disorders of children ages 3 to 5 years. Leading clinicians and researchers present both the research background and recent advances in play therapy adapted for use with children who exhibit a variety of internalizing, externalizing, and developmental disorders as well as prevention programs for at-risk children. Case illustrations are used to demonstrate interventions for children with mild to moderate behavior problems, preschool children with insecure attachment, and children with posttraumatic issues. Contributors demonstrate how to use play therapy in conjunction with parent psychotherapy and cognitive-behavioral therapy, discuss interventions for autistic and developmentally delayed children, and illustrate the use of play interventions in classroom and parent-child settings. Throughout, chapter authors provide practical guidance for the full implementation of clinical ideas, from intake through termination.

Clearly written and comprehensive in scope, this book is a must-have for any student or mental health professional who seeks a foil understanding of the latest theory and practice of play therapy with this uniquely vulnerable and often misunderstood population. (PsycINFO Database Record (c) 2012 APA, all rights reserved)

AD - Schaefer, Charles E.: Fairleigh Dickinson University, Teaneck, NJ, US

ER -

TY - JOUR

ID - 617

T1 - Characteristics of risky play. [References]

A1 - Sandseter, Ellen Beate Hansen

Y1 - 2009///

N1 - Peer Reviewed Journal: 2010-11391-002

English

Journal; Peer Reviewed Journal

KW - PsycInfo

KW - Childhood Play Behavior

KW - Injuries

KW - Risk Taking

RP - NOT IN FILE

SP - 3

EP - 21

JF - Journal of Adventure Education and Outdoor Learning

VL - 9:

IS - 1

N2 - This paper explores what makes children's risky play risky. Risky play can generally be defined as thrilling and exciting forms of play that involve a risk of physical injury. Few, if any, studies have been conducted to explore what identifies play activity as risky. The present study aims to determine what characteristics to judge risky play by. Risky play in two Norwegian preschools was observed and videotaped during 18 observation days over five months. The results reveal two categories of risk characteristics in children's play: (1) environmental characteristics (features of the play environment), and (2) individual characteristics (how the play was carried out by the child). These two categories include several different risk characteristics that identify the risk in risky play. The results indicate that both features of the play environment as well as children's risk-taking actions based on their subjective risk perception influence the objective risk present in the play situation. The study contributes to an increased focus on children's natural urge for risky play, and to what characterizes such play. (PsycINFO Database Record (c) 2012 APA, all rights reserved) (journal abstract)

SN - 1472-9679

AD - Sandseter, Ellen Beate Hansen: Department Physical Education, Queen Maud University, College of Early Childhood Education (DMMH), Trondheim, Norway

ER -

TY - JOUR

ID - 618

T1 - Pretend play, emotional processes, and developing narratives. [References]

A1 - Russ, Sandra W.

Y1 - 2009///

N1 - Book: 2010-05424-015

English

Book; Edited Book

KW - PsycInfo

KW - Creative Writing

KW - Emotions

KW - Narratives

KW - Pretend Play

KW - Creativity

KW - Imagination

KW - Writers

RP - NOT IN FILE

SP - 247

EP - 263

JF - Kaufman, Scott Barry [Ed]; Kaufman, James C [Ed]

VL - :

IS - 2009

N2 - (from the chapter) Pretend play sets the stage for the creative writer. So many processes that are important in creative writing occur in the play of childhood and are developed in the arena of pretend play. Pretend play involves imagination, fantasy, storytelling, emotional expression, becoming absorbed in the moment, being spontaneous, taking risks, understanding the perspectives of others, and experiencing the joy of creation. Individuals who are able to engage in pretend play as children should be able to access these processes as adults during the writing process. This chapter reviews processes in pretend play that are important in creativity, with a specific focus on emotional processes and creative writing. Although pretend play in children is a long way from creative writing in adults, nevertheless basic elements of the creative process occur in play. We can study these processes and learn about how play can help foster these elements. As in many areas of creativity, both case studies of creative writers (Wallace, 1989) and research studies offer valuable information. This chapter includes theory, research, and case examples that illustrate creative processes in creative authors. (PsycINFO Database Record (c) 2012 APA, all rights reserved)

AD - Russ, Sandra W.: Department of Psychology, Case Western Reserve University, Cleveland, OH, US

ER -

TY - JOUR

ID - 619

T1 - Child-centered play therapy for children with low vision: A multiple case study

A1 - Filaccio, MaryLynn D.

Y1 - 2009///

N1 - Dissertation Abstract: 2009-99180-016

English

Dissertation Abstract

KW - PsycInfo

KW - Childhood Development

KW - Play Therapy

KW - Risk Factors

KW - Social Isolation

KW - Vision

RP - NOT IN FILE

SP - 1941

JF - Dissertation Abstracts International: Section B: The Sciences and Engineering

VL - 70:

IS - 3-B

N2 - This qualitative study was designed to explore the impact of child-centered play therapy for children with low vision. Because children with low vision are at risk for social isolation and misperceptions by others about their abilities, the current study sought to understand the impact of participation in play therapy on self-confidence and self-efficacy in children with low vision. The current study used qualitative methods including participant observation, narrative, and expert check-in/supervision to track the progress of three children, ages 4, 6, and 9 years, with low vision. Each child participated in six sessions of child-centered play therapy in their school settings. A mobile play therapy room supplied with toys appropriate for children with visual impairment was created and established for each session in the schools. Transcripts (videotape and audiotape) of each session were analyzed for themes, and cross-case analyses were conducted. Classroom teachers and visual impairment teachers were consulted weekly regarding their observations on behavior change during the course of therapy. In addition, classroom teachers and visual impairment teachers were asked to complete a survey to assess their perception of the child's self-efficacy before therapy and after therapy. The findings suggest that children with low vision may benefit from play therapy as evidenced by their progress in therapy and teacher reports. The findings also suggest that children with low vision seem to be capable of engaging in a wide variety of play behaviors including exploratory, functional/manipulative, make-believe, and games with rules. Further,

the findings remind us that the development of children with disabilities are also influenced by many of the same factors as children without disability, that is, age, gender, family characteristics, and socioeconomic status. Implications and suggestions for future research are provided. (PsycINFO Database Record (c) 2012 APA, all rights reserved)

SN - 0419-4217

AD - Filaccio, MaryLynn D.: U Northern Colorado, US

ER -

TY - JOUR

ID - 620

T1 - The relationship between individual differences in cognitive, social and personality development and the increase in complexity of children's alcohol expectancies

A1 - Bekman, Nicole M.

Y1 - 2009///

N1 - Dissertation Abstract: 2009-99160-142

English

Dissertation Abstract

KW - PsycInfo

KW - Cognitive Complexity

KW - Cognitive Development

KW - Individual Differences

KW - Personality Development

KW - Psychosocial Development

KW - Alcohols

RP - NOT IN FILE

SP - 1333

JF - Dissertation Abstracts International: Section B: The Sciences and Engineering

VL - 70:

IS - 2-B

N2 - The current study aimed to simultaneously examine cognitive, social and personality development in a cross-sectional sample of 3rd, 4th and 5th grade children to explore the interplay among these processes and how they relate to changes in children's understanding of alcohol. To replicate previous work, this study comprehensively examined relative increases in types of expectancies as a function of development. Results demonstrated that children in higher grades held more positive, negative and sedating expectancies of alcohol and positive alcohol expectancies increased more than negative alcohol expectancies. Improved performance on cognitive measures were associated with positive alcohol expectancy endorsement, indicating that children's ability to incorporate positive beliefs about alcohol, which are conflicting with information typically taught to children in this age range, may be related to their ability to form and articulate concepts with age. Among male participants, sensation seeking increased with age and was strongly associated with positive ideas about alcohol use, such as wanting to experiment with alcohol or planning to drink as an adult. Social influences on alcohol expectancies included exposure to drinking. When children's parents drank more, they had higher positive, negative and sedating alcohol expectancies, indicating that they had a greater understanding of all potential consequences of drinking, while children whose friends drank had higher positive but not other types of expectancies. Additionally, children who turned to adults for advice held increasing levels of negative and sedating alcohol expectancies across age, while children who sought support from their peers showed higher levels of positive and arousing expectancies across age groups. The interplay between cognitive development and risk factors such as social awareness of alcohol, source of social influence, and sensation seeking personality begins to demonstrate key relationships to alcohol expectancies in late childhood. These social and personality risk factors are likely to play an even greater role in early adolescence as children move to middle school and experience puberty. This study provides a basis for future elaboration of the roles these constructs play in an individual's ability to understand the multifaceted expectations that are held in our society about the effects of alcohol on human behavior. (PsycINFO Database Record (c) 2012 APA, all rights reserved)

SN - 0419-4217

AD - Bekman, Nicole M.: U South Florida, US

ER -

TY - JOUR

ID - 621

T1 - The communicative accomplishment of mutuality during father-son play in early childhood

A1 - Sweet,Dawn M.

Y1 - 2009///

N1 - Dissertation Abstract: 2009-99070-101

English

Dissertation Abstract

KW - PsycInfo

KW - Childhood Play Behavior

KW - Father Child Communication

KW - Father Child Relations

KW - Fathers

KW - Sons

KW - Individual Differences

RP - NOT IN FILE

SP - 3803

JF - Dissertation Abstracts International Section A: Humanities and Social Sciences

VL - 69:

IS - 10-A

N2 - This dissertation reports a three-study investigation of mutuality within self-directed play sessions of four African-American father-son dyads at two points in time. These three studies use multiple methods for systematically analyzing face-to-face interaction occurring within a finite space, namely a play area of a daycare center, during a fixed period of time, approximately 15 minutes. This dissertation develops a systematic approach for studying mutuality as it links to well-being as a quality of every day life and individual development. This research offers communication explanations for how relationships in the early stages of life are formed and a way of thinking about well-being across psychological, cognitive, emotional, and social domains from a communication perspective. Study 1 uses exploratory microanalytic techniques (Mokros, 2003) to identify units of decision making during father-son play. Through its in-depth and systematic examination of decision making, Study 1 provides a vocabulary for talking about decision making from a communication perspective and ultimately provides a conceptual framework and coding system for identifying features of mutuality within father-son interaction. From insights gleaned from this first study, the research in Study 2 reports a comparative study that focuses on understanding individual differences in the amount and quality of mutuality exhibited within and across four father-son dyads at two points in time. This research concludes with Study 3, a comparative study designed to link Interaction States identified in Study 2 with Command Sequences identified by using the Dyadic Parent-Child Interaction Coding System (DPICS) (Eyeberg & Robinson, 1983). This study contributes to communication theory and research because it examines the moment-to-moment child-rearing practices in families at risk and speaks to how through communicative practices, fathers and sons are able to construct and sustain moments of mutual focus on a task or each other and what this says about not only how relationships in the early stages of life are developed but also about well-being as a quality of everyday life and individual development. (PsycINFO Database Record (c) 2012 APA, all rights reserved)

SN - 0419-4209

AD - Sweet, Dawn M.: Rutgers The State U New Jersey - New Brunswick, US

ER -

TY - JOUR

ID - 622

T1 - Beyond the words of a storyteller: The cine-semiotic play of the abject, terror and community in the anti-hunting trilogy of Thornton W. Burgess

A1 - Connor,Kathleen Marie

Y1 - 2009///

N1 - Dissertation Abstract: 2009-99030-028

English

Dissertation Abstract

KW - PsycInfo

KW - Communities



KW - Language

KW - Semiotics

KW - Terrorism

RP - NOT IN FILE

SP - 3073

JF - Dissertation Abstracts International Section A: Humanities and Social Sciences

VL - 69:

IS - 8-A

N2 - Thornton W. Burgess (b. 1874, d. 1965) was a children's writer who attained great popularity and commercial success, with stories such as *Old Mother West Wind* (1910) and *The Adventures of Peter Cottontail* (1914) published by Little, Brown and Company, and with reprinted titles now published by Dover Press. His stories have been read from their initial publication in the early 1900s until the present day, and numerous titles have been translated to languages such as Japanese, French, Italian, and Gaelic. However, at times his works were not well-reviewed by children's literary critics, and so his mixed reception creates a mystery around "What is it about Burgess that readers either loved or hated?" My conceptual framework grounded in ideas of New Historicism and cultural studies draws upon psychoanalytic concepts (after Kristeva, others) and film theory (after Bordwell, others) to explore the narrative appeal of three related Burgess works: *The Adventures of Poor Mrs. Quack* (1917), *The Adventures of Bob White* (1919), and *Lightfoot the Deer* (1921). I was able to trace how Mr. Burgess conveyed his inner-most thoughts of primal drama (after Freud, Kristeva and Adler) of the lived and imagined stories of family and domestic affairs of friends and family, co joined with a political message of the early 20th century show-down between nature and encroaching urbanization. I found that Burgess practiced an economy of story-telling known for cinema and film (after Heath). The result in his well-known stories was an emergent aesthetic experience of seeing/feeling/meaning I term the cine-semiotic, evoking notions of *le semiotique* = psychoanalytic semiotics and *la semiotique* = filmic or sign operation semiotics (Rosen, 1986). It seems that Burgess shares a visual aesthetic with other children's writers such as Beatrix Potter, the English creator of *Peter Cottontail* (Carpenter, 1989). Through a close reading, documentation, and interpretation of three selected stories of Burgess which I term his *Anti-Hunting Trilogy*, this study seeks to understand the enigmatic nature of his mixed reception in early 20th century children's literature. I have used archival-historical primary research materials along with readings of his stories to provide data around the nature of his popularly appealing narrative aesthetic. I became aware of a mode of address to the reader that I have termed the "cine-semiotic," which speaks to the language of Mr. Burgess's stories based in deep renditions of psychic dynamics which emanate through: (a) scripted movements of the abject and abjection, terror and anxiety, and community and wholeness; and (b) telling and showing aspects of narrative that play out through visual iconicity and other cinematic operations of the story language (after Bordwell, 1985). The results of my study provide a new means for interpreting, understanding and expressing the social, cultural and psychic effects resident within three stories written and published by Mr. Burgess from 1917 to 1921, and republished into the 21st century by Dover Publications for an avid and devoted contemporary readership. The implications of the study are that, under the conditions of language looking in at language, scholars looking in at children's stories can begin to discern meaningful patterns of cultural discourse that may otherwise go undiscerned.

(PsycINFO Database Record (c) 2012 APA, all rights reserved)

SN - 0419-4209

AD - Connor, Kathleen-Marie: U Ottawa, Canada

ER -

TY - JOUR

ID - 623

T1 - Yoplay: Yoga based play therapy as a model of early intervention for inner city children at risk

A1 - Price, Shannon

Y1 - 2009///

N1 - Dissertation Abstract: 2009-99020-341

English

Dissertation Abstract

KW - PsycInfo

KW - At Risk Populations

KW - Early Intervention

KW - Play Therapy

KW - Urban Environments

KW - Yoga

RP - NOT IN FILE

SP - 4439

JF - Dissertation Abstracts International: Section B: The Sciences and Engineering

VL - 69:

IS - 7-B

N2 - Our nation is filled with countless children who are at-risk and in need of support, yet are not getting the help that is required for them to succeed. One fifth of young children in the United States live in poverty (National Center for Children in Poverty, 2004). Children living in low-income neighborhoods are known to have a high incidence of behavioral problems, trauma exposure and stress (Brown, McQuaid, Farina & Winnick-Gelles, 2006; Stein et al., 2003; Ackerman, Brown, & Izard, 2004; Lengua, 2002). This paper proposes an early intervention strategy using a yoga-based play therapy model for inner city, economically disenfranchised children. The intention is that through secondary prevention, the YoPlay training program will help to mitigate the adverse impact of poverty, trauma and stress on the developing child by encouraging the use of movements that incorporate the mind and the body to improve self-regulation, self-esteem, coping strategies, social skills and socio-emotional growth. By educating early childcare providers, this program will provide the training, resources and support needed for teachers to help strengthen their children through play and yoga in the classroom. This paper reviews research literature that documents the devastating impact of poverty, trauma and stress on the healthy development of young children. In addition, research literature is presented that shows how, with proper support, children can be taught the skills necessary to become resilient in the face of overwhelming adversity. This literature outlines the importance of physical play, dance and yoga in enhancing social and emotional development as well as resilience. In particular, yoga designed specifically for young children is proposed as an effective way for children to build self-confidence and learn about self-regulation. A teacher-training manual is included in the methods section as a product of this project. During the training, teachers spend an entire day on their own personal development, and spend the next day learning body-based interventions targeting pre-school children. Research on the YoPlay training indicated an increased enthusiasm, playfulness and invigoration in the teachers. In addition, teachers reported that the YoPlay program helped children calm down, re-group, and get in touch with their bodies and emotions. By partnering with key childcare providers, the YoPlay program aims to foster the healthy development of young, at-risk children so they may reach their full potential and become productive, joyful adults with big dreams and the resilience to pursue them. (PsycINFO Database Record (c) 2012 APA, all rights reserved)

SN - 0419-4217

AD - Price, Shannon: Massachusetts School Of Professional Psychology, US

ER -

TY - JOUR

ID - 624

T1 - An exploration of the links between qualities of the parent-child relationship and romantic relational aggression

A1 - Melniker,Rachael F.

Y1 - 2009///

N1 - Dissertation Abstract: 2009-99020-337

English

Dissertation Abstract

KW - PsycInfo

KW - Aggressive Behavior

KW - Attachment Behavior

KW - Mother Child Relations

KW - Parental Attitudes

KW - Romance

KW - Relational Aggression

RP - NOT IN FILE

SP - 4433

JF - Dissertation Abstracts International: Section B: The Sciences and Engineering

VL - 69:

IS - 7-B

N2 - The purpose of this study is to explore the relationships between attachment style, parental behaviors and attitudes, and romantic relational aggression. A review of the literature underscored the continuity between the quality of one's early attachment relationships with parents/caregivers and the quality of subsequent relationships with both peers and romantic partners. Insecure attachment relationships have consistently been associated with a variety of negative outcomes, though the current study focuses exclusively on the development of aggressive behavior. Research conducted on the relationship between attachment and aggression has found that insecurely attached individuals are more likely to aggress against peers and romantic partners than their secure counterparts. Parental psychological control or overprotection has similarly been identified within the literature as a risk factor for the development of aggressive behavior. The current study explored the role that both attachment to parents and parental attitudes and behaviors play in the development of relationally aggressive behavior in romantic relationships. Participants in the current study were 154 heterosexual males and females, all 18 years of age and older, each of whom completed a survey based upon their relationships with both parents/caregivers and romantic partners. Statistical analyses revealed that relationships with fathers early in life play an important role in the development of relationally aggressive behavior in romantic relationships, while relationships with mothers did not emerge as significant predictors of romantic relational aggression. Individuals with more secure attachments to their fathers were less likely to aggress relationally against a romantic partner than were insecurely attached individuals. Similarly, fathers who demonstrated more warmth and caring had children who engaged in less romantic relational aggression than those with fathers who were colder and less supportive. This study provides additional insight into the antecedents of relationally aggressive behavior in romantic relationships and highlights the legacy even the earliest relationships leave. (PsycINFO Database Record (c) 2012 APA, all rights reserved)

SN - 0419-4217

AD - Melniker, Rachael F.: Massachusetts School Of Professional Psychology, US

ER -

TY - JOUR

ID - 625

T1 - Infant coping and maternal interactive behavior predict attachment in a Portuguese sample of healthy preterm infants. [References]

A1 - Fuertes,Marina; Lopes-dos-Santos,Pedro; Beeghly,Marjorie; Tronick,Ed

Y1 - 2009///

N1 - Peer Reviewed Journal: 2009-24481-007

English

Journal; Peer Reviewed Journal

KW - PsycInfo

KW - Attachment Behavior

KW - Coping Behavior

KW - Infant Development

KW - Mother Child Relations

KW - Premature Birth

RP - NOT IN FILE

SP - 320

EP - 331

JF - European Psychologist

VL - 14:

IS - 4

N2 - In this longitudinal study of a Portuguese sample of healthy preterm infants, the aim was to identify specific, independent predictors of infant-mother attachment status from a set of variables including maternal education, maternal representations' of infant temperament, infant regulatory behavior (coping), and mothers' interactive behavior in free play. The sample consisted of 48 medically low-risk preterm infants and their mothers who varied in education. When infants were 1 and 3 months (corrected age), mothers described their infants' temperament using a Portuguese temperament scale (Escala de Temperamento do Bebe). At 3 months (corrected age), infants' capacity to regulate stress (coping) was evaluated during Tronick's Face-to-Face Still-Face paradigm (FFSF). At 9 months (corrected age), mothers' interactive behaviors were evaluated during free play using the Crittenden's Child-Adult Relationship Experimental Index (CARE-Index). At 12 months

(corrected age), infants' attachment security was assessed during Ainsworth's strange situation. Sixteen (33.3%) infants were classified as securely attached, 17 (35.4%) as insecure-avoidant, and 15 (31.3%) as insecure-resistant. In bivariate analyses, multiple factors were significantly associated with attachment status. However, in hierarchical regression analyses, only infant coping and maternal responsiveness were significant predictors of attachment status. These findings suggest that both infant characteristics identifiable early in the first year, such as coping, and maternal characteristics such as sensitivity influence the process of attachment formation. (PsycINFO Database Record (c) 2012 APA, all rights reserved) (journal abstract)

SN - 1016-9040

AD - Fuertes, Marina: Child Development Unit, Boston, MA, US Lopes-dos-Santos, Pedro: University of Porto, Porto, Portugal Beeghly, Marjorie: Child Development Unit, Boston, MA, US Tronick, Ed: Child Development Unit, Boston, MA, US

ER -

TY - JOUR

ID - 626

T1 - Ethical issues relating to the banking of umbilical cord blood in Mexico. [References]

A1 - Serrano-Delgado, V.

Y1 - 2009///

N1 - Peer Reviewed Journal: 2009-21282-001

English

Journal; Peer Reviewed Journal

KW - PsycInfo

KW - Bioethics

KW - Biotechnology

KW - Laws

KW - Neural Regeneration

RP - NOT IN FILE

JF - BMC Medical Ethics

VL - 10 Aug 2009, ArtID 12.

N2 - Background: Umbilical cord banks are a central component, as umbilical cord tissue providers, in both medical treatment and scientific research with stem cells. But, whereas the creation of umbilical cord banks is seen as successful practice, it is perceived as a risky style of play by others. This article examines and discusses the ethical, medical and legal considerations that arise from the operation of umbilical cord banks in Mexico. Discussion: A number of experts have stated that the use of umbilical cord goes beyond the mere utilization of human tissues for the purpose of treatment. This tissue is also used in research studies: genetic studies, studies to evaluate the effectiveness of new antibiotics, studies to identify new proteins, etc. Meanwhile, others claim that the law and other norms for the functioning of cord banks are not consistent and are poorly defined. Some of these critics point out that the confidentiality of donor information is handled differently in different places. The fact that private cord banks offer their services as "biological insurance" in order to obtain informed consent by promising the parents that the tissue that will be stored insures the health of their child in the future raises the issue of whether the consent is freely given or given under coercion. Another consideration that must be made in relation to privately owned cord banks has to do with the ownership of the stored umbilical cord. Summary: Conflicts between moral principles and economic interests (non-moral principles) cause dilemmas in the clinical practice of umbilical cord blood storage and use especially in privately owned banks. This article presents a reflection and some of the guidelines that must be followed by umbilical cord banks in order to deal with these conflicts. This reflection is based on the fundamental notions of ethics and public health and seeks to be a contribution towards the improvement of umbilical cord banks' performance. (PsycINFO Database Record (c) 2012 APA, all rights reserved) (journal abstract)

SN - 1472-6939

AD - Serrano-Delgado, V. Moises: Obstetrics and Gynaecology Hospital with Family Medicine, Mexican Institute of Social Security, Mexico City, Mexico Novello-Garza, Barbara: Direccion de Prestaciones Medicas, Mexican Institute of Social Security, Mexico City, Mexico Valdez-Martinez, Edith: Health Research Council, Mexican Institute of Social Security, Mexico City, Mexico

ER -

TY - JOUR

ID - 628

T1 - Childhood body mass index in community context: Neighborhood safety, television viewing, and growth trajectories of BMI. [References]

A1 - Cecil-Karb,Rebecca; Grogan-Kaylor,Andrew

Y1 - 2009///

N1 - Peer Reviewed Journal: 2009-11363-001

English

Journal; Peer Reviewed Journal

KW - PsycInfo

KW - Childhood Play Behavior

KW - Neighborhoods

KW - Obesity

KW - Parental Attitudes

KW - Television Viewing

KW - Body Mass Index

KW - Safety

RP - NOT IN FILE

SP - 169

EP - 177

JF - Health & Social Work

VL - 34:

IS - 3

N2 - The United States is currently experiencing an epidemic of children who are overweight or obese.

Recently, research on child obesity has begun to examine the relationship between neighborhood environments and the health behaviors of youths. The current study used growth curve analysis based on multilevel modeling to examine the relationship between parents' perceptions of neighborhood safety and children's body mass index (BMI). Parents' perceptions of neighborhood safety had a significant association with children's BMI, and this relationship was fully mediated by television viewing. The results of this study suggest that when parents perceive their neighborhood to be unsafe, they will restrict their children's outdoor activities and increase the likelihood of sedentary indoor activity. Policies aimed at reducing overweight and obesity in children should take into account the neighborhood contexts in which children live. (PsycINFO Database Record (c) 2012 APA, all rights reserved) (journal abstract)

SN - 0360-7283

AD - Cecil-Karb, Rebecca: School of Social Work, University of Michigan, Ann Arbor, MI, US Grogan-Kaylor, Andrew: School of Social Work, University of Michigan, Ann Arbor, MI, US

ER -

TY - JOUR

ID - 630

T1 - Reclaiming science: Evidence and truth in the age of persuasion. [References]

A1 - de,St

Y1 - 2009///

N1 - Electronic Collection: 2009-08971-001

English

Electronic Collection

KW - PsycInfo

KW - Childhood Development

KW - Fear

KW - Parenting Style

KW - Protective Factors

KW - Society

KW - Childhood Play Development

KW - Life Experiences

KW - Safety

KW - Social Deprivation

RP - NOT IN FILE

JF - PsycCRITIQUES

VL - 54:

IS - 43

N2 - Reviews the book, Reclaiming childhood: Freedom and play in an age of fear by Helene Guldberg (see record 2008-17614-000). In this book, the author addresses topics that are of great interest to parents, educators, and researchers. The take-home message of the book is that children in the United Kingdom and the United States today are worse off than were children from the last two generations because of societal shifts toward overprotection. Helicopter parenting, unreasonable safety requirements, and out-of-proportion fears regarding stranger danger, bullying, and Internet predators have led to a "cocooning" of children that deprives them of experiences that foster resiliency, curiosity, and self-efficacy. It is peculiar that we, both parents and developmental psychologists, were more likely to agree with this statement before we read the book than after reading the book. We chose to review this book, in part, so that we could become aware of the science that undergirds this claim. While it does, indeed, seem that children today are being partially paralyzed by fear-based parenting and overprotective policies, this book fails to convince us of that. The misuse of science and the clumsy attempt at persuasion leave us wondering whether and how children today are faring, given the changing sociohistorical realities they face. (PsycINFO Database Record (c) 2012 APA, all rights reserved)

SN - 1554-0138

ER -

TY - JOUR

ID - 631

T1 - The risk is that there is 'no risk': A simple, innovative intervention to increase children's activity levels.

[References]

A1 - Bundy, Anita C.

Y1 - 2009///

N1 - Peer Reviewed Journal: 2009-06491-004

English

Journal; Peer Reviewed Journal

KW - PsycInfo

KW - Childhood Play Behavior

KW - Early Childhood Development

KW - Physical Activity

KW - Playgrounds

KW - Social Interaction

KW - Activity Level

KW - Creativity

KW - Safety

RP - NOT IN FILE

SP - 33

EP - 45

JA - International Journal of Early Years Education

VL - 17:

IS - 1

N2 - School playgrounds offer everyday opportunities for physically active and social play that combats obesity, develops skills, and promotes well-being. However, teachers' fear of the legal consequences of injury can elicit over-zealous risk reduction with the result that playgrounds lack challenge, and the potential benefits of play become limited. In this research, we trialled a simple, cost-effective strategy to encourage children to be more active and social on a school playground. Over 11 weeks, we made available materials with no fixed purpose (e.g. car tires, boxes) to a playground of children aged five to seven. Accelerometers showed children became significantly more active. Interviews with teachers suggested children also became more social, creative, and resilient. However, despite no incidence of injuries, teachers perceived an increased risk and encountered dilemmas regarding duty of care. We conclude that future interventions should address issues of 'surplus safety' at individual, school, system, and policy levels. (PsycINFO Database Record (c) 2012 APA, all rights reserved) (journal abstract)

SN - 0966-9760

AD - Bundy, Anita C.: Faculty of Health Sciences, University of Sydney, Lidcombe, NSW, Australia Lockett, Tim: Faculty of Health Sciences, University of Sydney, Lidcombe, NSW, Australia Tranter, Paul J.: University of New South Wales, Canberra, NSW, Australia Naughton, Geraldine A.: Australian Catholic University, Melbourne, VIC, Australia Wyver, Shirley R.: Macquarie University, Sydney, NSW, Australia Ragen, Jo: Faculty of Health Sciences, University of Sydney, Lidcombe, NSW, Australia Spies, Greta: Faculty of Health Sciences, University of Sydney, Lidcombe, NSW, Australia

ER -

TY - JOUR

ID - 632

T1 - Affordances for risky play in preschool: The importance of features in the play environment. [References]

A1 - Sandseter, Ellen Beate Hansen

Y1 - 2009///

N1 - Peer Reviewed Journal: 2009-05876-009

English

Journal; Peer Reviewed Journal

KW - PsycInfo

KW - Childhood Play Behavior

KW - Playgrounds

KW - Preschool Education

KW - Preschool Students

KW - Risk Taking

RP - NOT IN FILE

SP - 439

EP - 446

JF - Early Childhood Education Journal

VL - 36:

IS - 5

N2 - The purpose of this article is to qualitatively explore the affordances for risky play in two different preschool outdoor environments, an ordinary preschool playground and a nature playground, based on Gibson (The ecological approach to visual perception, 1979) theory of affordances and Heft's and Kyttea's (Heft in Children's Environ Qual 5(3) 29-37, 1988; Kytta in J Environ Psychol 22:109-123, 2002, Kytta in J Environ Psychol 24:179-198, 2004) extended work on this theory. Observations of risky play in two Norwegian preschools, one ordinary preschool (where play took place on an ordinary playground) and one nature and outdoor preschool (where play took place in a nature area) were conducted. In addition, the children were interviewed about their actualized affordances of risky play, their mobility license, and the constraints on risky play. The results show that both play environments afford an extensive amount of risky play among the children, and that the degree of mobility license tolerated by the staff is an important factor for the children to actualize these affordances. Differences in the qualities and features in the two play environments were found to have an impact on the degree of riskiness in the play situations. As such, the nature playground afforded a higher degree of risk in children's risky play. (PsycINFO Database Record (c) 2012 APA, all rights reserved) (journal abstract)

SN - 1082-3301

AD - Sandseter, Ellen Beate Hansen: Department of Physical Education, Queen Maud University, College of Early Childhood Education, Trondheim, Norway

ER -

TY - JOUR

ID - 633

T1 - Playful strategies to manage frustration: The turtle technique and beyond. [References]

A1 - Feindler, Eva L.

Y1 - 2009///

N1 - Book: 2009-04903-019

English

Book; Edited Book

KW - PsycInfo

KW - Aggressive Behavior  
 KW - Behavior Problems  
 KW - Frustration  
 KW - Play Therapy  
 KW - Anger Control  
 KW - Child Psychotherapy  
 KW - Clinicians  
 KW - Expressive Psychotherapy  
 RP - NOT IN FILE  
 SP - 401  
 EP - 422  
 JF - Drewes, Athena A [Ed]  
 VL - :

IS - 2009

N2 - (from the chapter) Aggressive behavior problems in young children are one of the most frequent referral issues for clinicians, and since early patterns may predict later antisocial behaviors, early interventions seem fundamental. Contextual risk factors have focused on parents who provide harsh discipline, poor monitoring, and inconsistent contingency management. Emotion regulation, in particular, the regulation of anger and frustration, influences the occurrence of cognitive and social skills necessary for prosocial functioning. Turtle Magic is a short children's story designed to highlight several main components of anger management for young children. Children's pretend play has long been proposed as a mode of social interaction that enhances the development of emotion regulation. Parent Child Interaction Therapy teaches parents behavior management strategies along with problem solving and play skills for enhancing the positive connections between parents and their children. Most likely, effective treatment would incorporate a number of play therapy strategies as they are quite effective in general for preschool children, would be disseminated in an individual or small-group format for children who are clinically referred, and would include a parent training component specific to anger management. Further, such strategies will help newly learned arousal management skills generalize across natural environments and will be better adapted to interactions with both peers and adults in those settings. Finally, parents and teachers play a crucial role in the implementation and maintenance of any therapeutic program for young children. (PsycINFO Database Record (c) 2012 APA, all rights reserved)

AD - Feindler, Eva L.: Long Island University, Brookville, NY, US

ER -

TY - JOUR

ID - 634

T1 - Parenting of 7-month-old infants at familial risk for ADHD during infant's free play, with restrictions on interaction. [References]

A1 - Landau,Rivka; Amiel-Laviad,Riki; Berger,Andrea; Atzaba-Poria,Naama; Auerbach,Judith

Y1 - 2009///

N1 - Peer Reviewed Journal: 2009-04272-006

English

Journal; Peer Reviewed Journal

KW - PsycInfo

KW - Attention Deficit Disorder with Hyperactivity

KW - Childhood Play Behavior

KW - Father Child Relations

KW - Mother Child Relations

KW - Parenting Style

KW - Risk Factors

RP - NOT IN FILE

SP - 173

EP - 182

JF - Infant Behavior & Development

JA - Infant behav

VL - 32:

IS - 2



N2 - Patterns of interaction of 34 mothers and fathers with their 7-month-old boys at familial risk for ADHD and 25 comparison families were studied during infant play with blocks. The parents were instructed to refrain from intervening as much as possible. Infants in the risk group did not differ from those in the comparison group in frequency of needing help or involving parents in play. Nonetheless, they received adequate responsiveness from their mothers less often than infants in the comparison group. Mothers in the risk group were also more likely not to respond to these needs at all. Mothers in the comparison group were more physically intrusive. No group difference was found for maternal rebuilding of the infant's play. No group differences were found for any of father's behaviors. However, fathers in both groups rebuilt their infant's play more frequently than mothers, infants looked at them more often, and a larger number of infants involved the father in their play. (PsycINFO Database Record (c) 2012 APA, all rights reserved) (journal abstract)

SN - 0163-6383

AD - Landau, Rivka: Department of Psychology, Ben-Gurion University of the Negev, Beer Sheva, Israel

Amiel-Laviad, Riki: Department of Psychology, Ben-Gurion University of the Negev, Beer Sheva, Israel

Berger, Andrea: Department of Psychology, Ben-Gurion University of the Negev, Beer Sheva, Israel

Atzaba-Poria, Naama: Department of Psychology, Ben-Gurion University of the Negev, Beer Sheva, Israel

Auerbach, Judith G.: Department of Psychology, Ben-Gurion University of the Negev, Beer Sheva, Israel

ER -

TY - JOUR

ID - 636

T1 - Reclaiming childhood: Freedom and play in an age of fear. [References]

A1 - Guldberg, Helene

Y1 - 2009///

N1 - Book: 2008-17614-000

English

Book; Authored Book

(Created by PsycINFO) Acknowledgements Introduction Part I: The good, the bad, and the history: A balance sheet of modern childhood A childish panic about the next generation Cocooning children Childhood in historical perspective Part II: Freedom and child development Growing up: Why risk-taking is good for kids Play: What is it good for? The bullying bandwagon Virtual lives? Media, brands and the MySpace generation Part III: Taking real responsibility: The role of adult society Let parents be parents: The myth of infant determinism Let teachers be teachers-Not social workers and 'happiness counsellors' Let strangers be friends: How the 'stranger danger' panic is creating a hostile adult world Afterword Bibliography Index

KW - PsycInfo

KW - Childhood Development

KW - Childhood Play Behavior

KW - Early Experience

KW - Freedom

KW - Sociocultural Factors

KW - Expectations

KW - Fear

KW - Safety

KW - Uncertainty

RP - NOT IN FILE

SP - New

JF - (2009)

VL - Reclaiming childhood: Freedom and play in an age of fear. ix, 205 pp. New York, NY, US:

Routledge/Taylor & Francis Group; US.

N2 - (from the book) Children are cooped up, passive, apathetic and corrupted by commerce ... or so we are told. Reclaiming Childhood confronts the dangerous myths spun today about childhood. Yes, modern children are losing out on many experiences past generations took for granted, but their lives have improved in so many other ways. Helene Guldberg exposes the stark consequences on child development of both our low expectations of fellow human beings and our safety-obsessed culture. She argues that, rather than projecting fears and uncertainties on to children, we need to allow them to grow and flourish, to balance sensible guidance with youthful independence. Reclaiming Childhood suggests ways we can work to improve a child's experience, as well as that of parents, teachers and 'strangers', simply by taking a step back from panic and doom-

mongering. (from the introduction) Unsupervised play is very important for children's social, emotional, cognitive, and physical development. Children need to be given space away from adults' watchful eyes-in order to play, experiment, take risks (within a sensible framework provided by adults), test boundaries, have arguments, fight, and learn how to resolve conflicts. (PsycINFO Database Record (c) 2012 APA, all rights reserved)

AD - Guldberg, Helene: Open U, Milton Keynes, England

ER -

TY - JOUR

ID - 641

T1 - Brief report: Behavioral risk factors for youth soccer (football) injury. [References]

A1 - Schwebel,David C.

Y1 - 2007///

N1 - Peer Reviewed Journal: 2007-06453-003

English

Journal; Peer Reviewed Journal

KW - PsycInfo

KW - Adolescent Attitudes

KW - Injuries

KW - Risk Factors

KW - Soccer

KW - Sports

RP - NOT IN FILE

SP - 411

EP - 416

JF - Journal of Pediatric Psychology

JA - J Pediatr Psychol.

VL - 32:

IS - 4

N2 - Objectives: By most reports, soccer (football) is among the most played and most popular sports in the world. This study prospectively examined behavioral risk factors for youth soccer injury. Method: Sixty 11- and 12-year-old boys who played on six teams in a suburban recreational soccer league were followed over the course of a season. Six predictors were assessed prior to the start of the season via self-report measures from coaches, parents, and the players themselves: inhibition, aggression, risk-taking, skill, experience playing soccer, and physical size. All games were videotaped, and tapes were reviewed to record players' collisions with other players, fouls, falls during the course of play, and injuries. Results: Greater skill and less experience playing soccer best predicted injury risk. Inhibition, aggression, and risk-taking did not emerge as predictors. Conclusion: Results are discussed with respect to previous research in youth sport and general pediatric injury risk. (PsycINFO Database Record (c) 2013 APA, all rights reserved) (journal abstract)

SN - 0146-8693

AD - Schwebel, David C.: Department of Psychology, University of Alabama at Birmingham, Birmingham, AL, US Banaszek, Mark M.: Department of Psychology, University of Alabama at Birmingham, Birmingham, AL, US McDaniel, McCall: Department of Psychology, University of Alabama at Birmingham, Birmingham, AL, US

ER -

TY - JOUR

ID - 645

T1 - The role of child temperament on head start preschoolers' social competence in the context of cumulative risk. [References]

A1 - Corapci,Feyza

Y1 - 2008///

N1 - Peer Reviewed Journal: 2007-19863-002

English

Journal; Peer Reviewed Journal

KW - PsycInfo

KW - Child Attitudes

KW - Personality

KW - Preschool Students

KW - Project Head Start

KW - Social Skills

KW - Childhood Play Behavior

KW - Peers

KW - Risk Factors

KW - Teachers

RP - NOT IN FILE

SP - 1

EP - 16

JF - Journal of Applied Developmental Psychology

VL - 29:

IS - 1

N2 - This study examined the main and interactive effects of cumulative risk and child temperament on teacher ratings of social competence and observer ratings of peer play in a sample of Head Start preschoolers. A cumulative risk index (CRI) was computed by summing the total number of risk factors for each family. There was a difference in the predictive power of the CRI when it consisted of 10 (including child temperament) versus 8 possible risk factors (excluding child temperament) for teacher ratings of social competence. The CRI based on 10 risk factors was related significantly and negatively to social competence. A significant interaction between inhibited child temperament and cumulative environmental risk revealed that highly inhibited children were perceived by their teachers as equally competent under both high- and low-risk, whereas less inhibited children received lower ratings as environmental risk increased. Less inhibited and less impulsive temperament emerged as promotive factors associated with high levels of interactive peer play and teacher ratings of social competence, respectively, regardless of the risk level. (PsycINFO Database Record (c) 2013 APA, all rights reserved) (journal abstract)

SN - 0193-3973

AD - Corapci, Feyza: Department of Psychological Sciences, Purdue University, West Lafayette, IN, US

ER -

TY - JOUR

ID - 646

T1 - Parent and teacher ratings of peer interactive play and social-emotional development of preschool children at risk. [References]

A1 - Gagnon,Sandra Glover; Nagle,Richard

Y1 - 2007///

N1 - Peer Reviewed Journal: 2007-07556-003

English

Journal; Peer Reviewed Journal

KW - PsycInfo

KW - Childhood Development

KW - Childhood Play Behavior

KW - Emotional Development

KW - Peer Relations

KW - Preschool Students

KW - Interpersonal Interaction

KW - Parental Attitudes

KW - Teacher Attitudes

RP - NOT IN FILE

SP - 228

EP - 242

JF - Journal of Early Intervention

VL - 29:

IS - 3

N2 - Estimates of agreement and consistency between parent and teacher ratings of peer-interactive play and social emotional development were examined in a sample of preschool children at risk for academic difficulties. Eighty-three pairs of parents and teachers of 4-year-old children completed the Penn Interactive Peer Play Scale (PIPPS) and 69 of these pairs also were interviewed with the Vineland Social-Emotional Early Childhood Scales (SEEC). Significant mean differences were found between parent and teacher scores on the PIPPS, but not on the SEEC. No noteworthy correlations were found between raters on the PIPPS, though low to moderate correlations were revealed between parent and teacher responses on the SEEC. Multivariate techniques revealed statistically significant and noteworthy correlations between parent and teacher responses on the SEEC but not on the PIPPS. Results are discussed within the context of conducting multifaceted, ecological assessments with preschool children. Implications for early childhood educators and interventionists are noted regarding the importance of gathering and interpreting multiple sources of information that contribute to an understanding of young children's behavior. (PsycINFO Database Record (c) 2012 APA, all rights reserved) (journal abstract)  
SN - 1053-8151

AD - Gagnon, Sandra Glover: Department of Psychology, Appalachian State University, Boone, NC, US  
Nagle, Richard J.: Appalachian State University, Boone, NC, US  
Nickerson, Amanda B.: University at Albany, Albany, NY, US  
ER -

TY - JOUR

ID - 647

T1 - Research to Reality: Applying Findings to Practice

A1 - Canham, Daryl L.

Y1 - 2006///

N1 - Peer Reviewed Journal: 2006-12946-009

English

Journal; Peer Reviewed Journal

KW - PsycInfo

KW - Attention Deficit Disorder with Hyperactivity

KW - Case Management

KW - Obesity

KW - Parental Attitudes

KW - School Nurses

KW - Early Intervention

KW - Family

KW - Health

KW - Preschool Students

RP - NOT IN FILE

SP - 296

EP - 298

JF - The Journal of School Nursing

VL - 22:

IS - 5

N2 - Presents two studies which apply findings to improve the practices of school nurses. The first study explored service use patterns and services needed for children with attention deficit/hyperactivity disorder (ADHD). This study presents several pertinent outcomes related to the school nurse role. School nurses need to target single-parent families and families with boys with ADHD, because these families may have a higher need for services. Development of case management models in the school setting is a major recommendation of this research study. The second study examined parental perceptions related to health status and play activities of a group of overweight toddlers and preschoolers. The purpose of this study was to examine parents' perceptions regarding their children's current health status; parental perceptions and understanding of the relationship between obesity and current and future health risks. School nurses play a major role in prevention and early intervention. School nurses who are associated with child care centers can screen preschoolers, identify those at risk for overweight and obesity, and refer families to appropriate resources. (PsycINFO Database Record (c) 2012 APA, all rights reserved)

SN - 1059-8405

AD - Canham, Daryl L.: School of Nursing, San Jose State University, San Jose, CA, US

ER -

TY - JOUR

ID - 648

T1 - Panic Symptoms and Disorder in Youth: What Role Does Anxiety Sensitivity Play? [References]

A1 - Hale,Lisa R.

Y1 - 2006///

N1 - Book: 2006-09562-005

English

Book; Edited Book

KW - PsycInfo

KW - Anxiety

KW - Panic Disorder

KW - Symptoms

KW - Anxiety Sensitivity

KW - Etiology

KW - Panic

RP - NOT IN FILE

SP - 131

EP - 162

JF - Velotis, Calvin M [Ed]

VL - :

IS - 2006

N2 - (from the chapter) There is growing recognition that panic symptoms and panic disorder are important clinical problems in youth, although there has been limited study and the developmental origins of these problems are largely unknown. Because little is know about the etiology of panic symptoms or panic disorder in children and adolescents, researchers have begun to investigate several processes. Anxiety sensitivity (AS), the fear of common anxiety symptoms and a possible cognitive risk factor for panic disorder, has been extensively studied in adults and has more recently been evaluated in adolescents and children. In investigations with clinical and nonclinical populations, AS has correlated with panic symptoms and panic severity. In an initial longitudinal investigation, increases in AS over time best predicted panic symptoms in youth. The developmental etiology of AS is largely unknown, but parent behavior has been implicated. AS may function as a cognitive risk factor for child and adolescent panic disorder and further study is warranted. (PsycINFO Database Record (c) 2012 APA, all rights reserved)

AD - Hale, Lisa R.: Department of Psychiatry and Behavioral Sciences, University of Kansas Medical Center, Kansas City, KS, US Calamari, John E.: Rosalind Franklin University of Medicine and Science, North Chicago, IL, US

ER -

TY - JOUR

ID - 649

T1 - PLAYSPACE: A preventive intervention for infants and young children at risk from postnatal depression. [References]

A1 - Kurzweil,Sonya

Y1 - 2008///

N1 - Peer Reviewed Journal: 2008-03761-002

English

Journal; Peer Reviewed Journal

KW - PsycInfo

KW - Childhood Play Behavior

KW - Childhood Play Development

KW - Group Psychotherapy

KW - Postpartum Depression

KW - Psychoanalysis

KW - At Risk Populations

KW - Intervention

KW - Prevention

KW - Socioeconomic Status

RP - NOT IN FILE

SP - 5

EP - 15

JF - International Journal of Mental Health Promotion

VL - 10:

IS - 1

N2 - Postnatal depression is known to have deleterious effects on child emotional, social and cognitive development, and yet there are few prevention programs and little research on prevention of psychopathology in populations of middle socio-economic status (SES). This paper presents a preventive intervention for this population of women, infants and young children. The intervention, referred to as PLAYSPACE, combines an ongoing, relational-developmental, psychoanalytically oriented therapy group for the women, with a teacher-led concurrent psychosocial play group in an engaging playspace for the children and, in addition for some women, individual relational-developmental psychotherapy with a concurrent individual child care option in the playspace. A previous article presented the adult group component and outcome research. In this article, the focus is child outcomes, the psychosocial play group and the individual child care component. (PsycINFO Database Record (c) 2012 APA, all rights reserved) (journal abstract)

SN - 1462-3730

AD - Kurzweil, Sonya: Department of Psychiatry, Harvard Medical School, Boston, MA, US

ER -

TY - JOUR

ID - 650

T1 - Examining resource and protective factors in the adjustment of Latino youth in low income families: What role does maternal acculturation play? [References]

A1 - Loukas,Alexandra; Suizzo,Marie-Anne; Prelow,Hazel

Y1 - 2007///

N1 - Peer Reviewed Journal: 2008-01922-010

English

Journal; Peer Reviewed Journal

KW - PsycInfo

KW - Acculturation

KW - Adjustment

KW - Parental Characteristics

KW - Protective Factors

KW - Risk Factors

KW - Internalization

KW - Juvenile Delinquency

KW - Lower Income Level

KW - Mother Child Relations

KW - Latinos/Latinas

RP - NOT IN FILE

SP - 489

EP - 501

JF - Journal of Youth and Adolescence

VL - 36:

IS - 4

N2 - This longitudinal study examined whether the risk and positive factors contributing to the delinquent behaviors and internalizing problems of 454 Latino adolescents varied across maternal linguistic acculturation and adolescent gender. Although the level of cumulative risk to which the 10-to-14-year old adolescents were exposed did not vary by maternal linguistic acculturation, the factors contributing to their subsequent adjustment 16 months later varied substantially. Multiple regression analyses showed that for boys, maternal monitoring offset cumulative risk effects in the high acculturation group, but was unrelated to adjustment in the low acculturation group. Social competence served a protective function for boys in the high acculturation group, but was detrimental for boys in the low acculturation group and mother-son relationship quality directly

predicted more subsequent delinquent behaviors among boys in the low acculturation group. Maternal monitoring was the only positive factor contributing to girls' adjustment, directly predicting fewer delinquent behaviors for all girls. (PsycINFO Database Record (c) 2012 APA, all rights reserved) (journal abstract)

SN - 0047-2891

AD - Loukas, Alexandra: Department of Kinesiology and Health Education, University of Texas at Austin, Austin, TX, US Suizzo, Marie-Anne: Department of Educational Psychology, University of Texas at Austin, Austin, TX, US Prelow, Hazel M.: Department of Psychology, University at Albany, State University of New York, Albany, NY, US

ER -

TY - JOUR

ID - 652

T1 - An ecological and developmental perspective on dropout risk factors in early adolescence: Role of school social workers in dropout prevention efforts. [References]

A1 - Jozefowicz-Simbeni, Debra M.

Y1 - 2008///

N1 - Peer Reviewed Journal: 2009-08088-006

English

Journal; Peer Reviewed Journal

KW - PsycInfo

KW - Childhood Development

KW - School Based Intervention

KW - School Dropouts

KW - Social Workers

KW - Ecology

KW - Prevention

KW - Risk Factors

RP - NOT IN FILE

SP - 49

EP - 62

JF - Children & Schools

VL - 30:

IS - 1

N2 - The role school social workers play within schools, the training they receive, and whether they are present in junior high schools are all factors that pose barriers and opportunities for school social workers' involvement in dropout prevention efforts during the middle school years. Such efforts are necessary because the unique challenges of early adolescence can bring about increased academic and behavioral problems and can eventually lead to school dropout. Unfortunately, few studies have examined dropout prevention in middle schools or junior high schools, and there has been little discussion of the role school social workers can play in dropout prevention efforts during this time of life. To highlight the ways that school social workers are needed and can be involved in dropout prevention in the middle schools, this article examines student and ecological risk factors associated with school dropout, the early adolescent life stage, dropout prevention approaches, and the role school social workers can play in multilevel dropout prevention efforts aimed at the middle school years. (PsycINFO Database Record (c) 2012 APA, all rights reserved) (journal abstract)

SN - 1532-8759

AD - Jozefowicz-Simbeni, Debra M. Hernandez: School of Social Work, Wayne State University, Detroit, MI, US

ER -

TY - JOUR

ID - 653

T1 - Preschoolers' heart rate and physical activity response to three different motivational climates: Mastery, performance, and unplanned free play

A1 - Parish, Loraine Elizabeth

Y1 - 2008///

N1 - Dissertation Abstract: 2008-99230-493

English

Dissertation Abstract

KW - PsycInfo

KW - Heart Rate

KW - Motivation

KW - Performance

KW - Physical Activity

KW - Physical Education

KW - Teachers

RP - NOT IN FILE

SP - 2198

JF - Dissertation Abstracts International Section A: Humanities and Social Sciences

VL - 69:

IS - 6-A

N2 - Although people of all ages benefit from regular, moderate intensity physical activity (U.S. Department of Health and Human Services, 1996) many children are showing less interest and participation in physical education and are adopting sedentary lifestyles (Sallis et al., 1992; U.S. Department of Health and Human Services, 1996). Incorporating regular, planned physical programs, as opposed to unplanned free play, into early childhood and preschool education programs may provide an effective means by which to engage young children in physical activity. In order to develop curricula that maximize engagement in physical activity it is important to identify teaching approaches that motivate young children to be physically active. The purpose of the current study was to investigate the influence of three motivational environments (mastery-oriented climate [MC], performance-oriented climate [PC], and unplanned free play [FP] [i.e., high autonomy with limited instruction and equipment]), on the physical activity behaviors of 27 preschoolers (11 boys, 16 girls) between the ages of 3- and 5-years-old (M age = 4.5, SD = 1.1 years) and at risk for developmental delay and poor health. The physical activity environment was manipulated according to Ames' (1992a, 1992b) guidelines for creating a mastery-oriented and a performance-oriented climate. Participants engaged in six, 30-minute physical activity sessions for each of the three conditions during which physical activity was measured via heart rate monitoring and accelerometers and physical activity intensity level was categorized using PAHR > 50. As shown by the manipulation check results, the physical activity teachers created three different motivational physical activity climates. Analyses of the physical activity data indicated that heart rate and PAHR > 50 were not significantly different across the three conditions. Although accelerometer count did not differ between the MC and PC conditions, both conditions were significantly higher compared to the FP condition. Heart rate and accelerometer count did not change over the six physical activity sessions of each condition. Although PAHR > 50 differed between sessions during the MC and PC conditions, there was no clear trend of change over the six physical activity sessions for the FP condition. The results of this study provide preliminary insight into young children's physical activity engagement during different motivational climates. In conclusion, future research should be conducted to better understand the impact of motivational climate on young children's physical activity. (PsycINFO Database Record (c) 2012 APA, all rights reserved)

SN - 0419-4209

AD - Parish, Loraine Elizabeth: Auburn U., US

ER -

TY - JOUR

ID - 654

T1 - "Will you play with me?": The relation of early aspects of maternal parenting to the later school social competence of children with disabilities

A1 - Young, Jessica Mercer

Y1 - 2008///

N1 - Dissertation Abstract: 2008-99080-160

English

Dissertation Abstract

KW - PsycInfo

KW - Developmental Disabilities

KW - Mother Child Relations



KW - Parenting Style

KW - Pediatrics

KW - Social Skills

RP - NOT IN FILE

SP - 7005

JF - Dissertation Abstracts International: Section B: The Sciences and Engineering

VL - 68:

IS - 10-B

N2 - This study seeks to extend knowledge of the relation between aspects of maternal parenting in early childhood to the later school social competence of children with disabilities. Children with developmental disabilities (DD) have more difficulty with social competence and exhibit more behavior problems than typically developing children. The question of which aspects of maternal parenting promote social competence is approached through a developmental-contextual systems model. Two key aspects of maternal parenting are posited to relate to the social competence and behavior problems of children with disabilities: (1) mother-child interaction and (2) maternal parenting-stress. The sample consisted of 146 families participating in the Early Intervention Collaborative Study, a longitudinal investigation of children with developmental disabilities (Down syndrome, motor impairment, or developmental delay) and their families. When the children were ages 2 and 3 mothers reported their levels of parenting-stress and mother-child dyads were observed during a teaching interaction. At age 5 children were observed in their classroom during peer-interaction. Teachers also reported on the children's classroom social competence. The findings reveal that mother-child dyads are at risk for less positive interactive styles as compared to typically developing dyads, as mothers of children with DD were found to interact with their children on average less positively and less contingently than mothers of children without disabilities. Despite this, mother-child interaction was important to the social competence of children with DD. The main findings indicate that at age 3 the quality of mother-child interaction was a key determinant of classroom social competence and behavior problems at age 5 predicting unique variance beyond the child's cognitive performance, type of disability, family socio-economic status, and parenting-stress. In contrast, no aspect of maternal parenting related to children's peer-related social competence. Collectively the findings suggest that interventions aimed at fostering positive mother-child interaction will target a relative weakness in parent-child interactions and simultaneously promote later classroom social competence and decrease behavior problems for children with developmental disabilities. (PsycINFO Database Record (c) 2012 APA, all rights reserved)

SN - 0419-4217

AD - Young, Jessica Mercer: Boston Coll., US

ER -

TY - JOUR

ID - 655

T1 - Play therapy techniques with very young at-risk children in child care settings. [References]

A1 - Robinson, Jane

Y1 - 2008///

N1 - Book: 2008-14952-009

English

Book; Edited Book

KW - PsycInfo

KW - At Risk Populations

KW - Attachment Behavior

KW - Early Intervention

KW - Mental Health

KW - Play Therapy

KW - Child Care

KW - Childhood Development

KW - Experimentation

KW - Program Evaluation

KW - Resilience (Psychological)

KW - Well Being

RP - NOT IN FILE

SP - 199

EP - 247

JF - Schaefer, Charles E [Ed]; Kelly-Zion, Sophronia [Ed]; McCormick, Judy [Ed]; Ohnogi, Akiko [Ed]

VL - :

IS - 2008

N2 - (from the chapter) At-risk children under the age of five are a large population, often forgotten, whose mental health needs are seldom met. Early intervention and prevention that focuses on attachment, resiliency, and play would help to strengthen their growth and development into functioning adults. This chapter will provide an overview of our All 'Bout Children, Inc. (ABC) multi-faceted intervention program, which focuses on at-risk young children, their families, and child care center staff. We will begin with a portrayal of a population of at-risk children, then move to a discussion of attachment, resiliency, and infant mental health and social emotional wellbeing. We will describe the program interventions, highlight child-centered play therapy and the rationale for its use, and conclude with discussion of program evaluation and research. (PsycINFO Database Record (c) 2012 APA, all rights reserved)

AD - Robinson, Jane: All 'Bout Children, West Palm Beach, FL, US Grobbel, Roxanne: All 'Bout Children, West Palm Beach, FL, US

ER -

TY - JOUR

ID - 656

T1 - Play therapy for very young children

A1 - Schaefer, Charles E [Ed]

Y1 - 2008///

N1 - Book: 2008-14952-000

English

Book; Edited Book

(Created by PsycINFO) Preface Part I: Major theoretical approaches \* Dynamic play with very young children / Steve Harvey / 3-23 \* Child-centered play therapy for very young children / Virginia Ryan and Sue Bratton / 25-66 \* Filial play therapy for infants and toddlers / Hilda R. Glazer / 67-83 \* Caregiver-toddler play therapy: An attachment-based approach / Helen E. Benedict / 85-102 \* Ecosystemic play therapy with infants and toddlers and their families / Beth Limberg and Sue Ammen / 103-124 \* Parent-child attunement therapy for toddlers: A behaviorally oriented, play-based parent training model / Stefan C. Dombrowski, Susan G. Timmer, and Nancy Zebell / 125-155 \* Theraplay with zero- to three-year-olds / Evangeline Munns / 157-170 Part II: Applications to specific populations \* Situational and story-stem scaffolding in psychodynamic play therapy with very young children / Theodore J. Gaensbauer and Kim Kelsay / 173-198 \* Play therapy techniques with very young at-risk children in child care settings / Jane Robinson and Roxanne Grobbel / 199-247 \* Issue-specific guided play to support infants, toddlers, and their families in health care settings: Rationale and interventions / Joy Goldberger and Anne Luebering Mohl / 249-277 \* Watch, wait, and wonder: Infants as agents of change in a play-based approach to mother-infant psychotherapy / Mirek Lojkasek, Elisabeth Muir, and Nancy J. Cohen / 279-305 \* Transdisciplinary play-based intervention with young children with disabilities / Toni W. Under, Keri Linos, and Kim Stokka / 307-337 \* Dyadic play therapy for homeless parents and children / Ruth P. Newton / 339-365 \* Developmental play therapy for very young children / Glenda F. Lester Short / 367-377 \* Play-based intervention for very young children with autism: The PLAY Project / Richard Solomon / 379-401 Index About the editors and contributors

KW - PsycInfo

KW - Early Intervention

KW - Mental Health

KW - Play Therapy

KW - Parent Training

KW - Therapists

RP - NOT IN FILE

SP - Lanham, MD, US

JF - (2008)

VL - Play therapy for very young children. x, 424 pp. Lanham, MD, US: Jason Aronson; US.

N2 - (from the preface) Regardless of the theoretical orientation of the play therapist, Play Therapy for Very Young Children can help the clinician in conceptualizing an infant's or toddler's world and the specific play

therapy interventions that can be effectively utilized with these children that would benefit from professional support. The book weaves together play therapy and infant mental health, which seems to be a natural marriage of two disciplines. It is exciting to see two fields come together to share expertise with each other. A further goal is to provide a comprehensive guideline of the most beneficial effects of play therapy and play for the very young. These chapters are based on current research and practice, and on the solid foundation of knowledge that each author has, related to what is important for infants and toddlers and their families in the field of play therapy as an optimal form of early intervention. The book includes extensive discussions of developmental play therapy, attachment-based caregiver-toddler play therapy, filial play therapy, mother-infant play, behaviorally oriented play-based parent training, Theraplay, play-based interventions with young children with disabilities, child centered play therapy, Ecosystemic Play Therapy, Dynamic Play, play therapy with children in care settings, issue-specific guided play, Psychodynamic Play Therapy, play therapy with the young homeless, and play-based interventions with young children with autism. Professionals in the field of mental health, especially play therapists, will find this book useful for increase of knowledge, as well as for clinical intervention. Multiple leading professionals in the field of early intervention and play therapy have contributed the various chapters. Although many are based in the United States, some are from other countries, and the client populations vary. Thus, this book should have helpful play therapy interventions that can be adapted for use with very young children from different cultures around the world. (PsycINFO Database Record (c) 2012 APA, all rights reserved)

AD - Schaefer, Charles E.: Fairleigh Dickinson University, Teaneck, NJ, US Kelly-Zion, Sophronia: Judson Independent School District, San Antonio, TX, US McCormick, Judy: Health Services Executive, Limerick, Ireland Ohnogi, Akiko: Private Practice, Tokyo, Japan

ER -

TY - JOUR

ID - 657

T1 - So sexy so soon: The new sexualized childhood and what parents can do to protect their kids. [References]

A1 - Levin,Diane E; Kilbourne,Jean

Y1 - 2008///

N1 - Book: 2008-13706-000

English

Book; Authored Book

(Created by PsycINFO) Introduction: Changing times, changing needs, changing responses Never too young to be sexy: Living with children in today's sexualized world From Barbie to Bratz and beyond: Sexy sells Sexual development derailed: The toll on children The toll on parents, families, and schools Helping children through the minefields: What parents, families, and schools can do Working it out together: The power of connecting deeply with children The sexualized child enters adolescence: The floodgates open Helping teenagers through the minefields Creating a new cultural environment Acknowledgments Resources Notes Index

KW - PsycInfo

KW - Childhood Development

KW - Childrearing Practices

KW - Parent Child Relations

KW - Psychosexual Behavior

KW - Sexuality

KW - Communications Media

KW - Popular Culture

KW - Technology

RP - NOT IN FILE

SP - New

JF - (2008)

VL - So sexy so soon: The new sexualized childhood and what parents can do to protect their kids. x, 226 pp. New York, NY, US: Ballantine Books; US.

N2 - (from the jacket) Thong panties, padded bras, and risqué Halloween costumes for young girls. T-shirts that boast "Chick Magnet" for toddler boys. Sexy content on almost every television channel, as well as in books, movies, video games, and even cartoons. Hot young female pop stars wearing provocative clothing and dancing suggestively while singing songs with sexual and sometimes violent lyrics. These products are marketed aggressively to our children; these stars are held up for our young daughters to emulate--and for our sons to see

as objects of desire. Popular culture and technology inundate our children with an onslaught of mixed messages at earlier ages than ever before. Corporations capitalize on this disturbing trend, and without the emotional sophistication to understand what they are doing and seeing, kids are getting into increasing trouble emotionally and socially; some may even engage in precocious sexual behavior. Parents are left shaking their heads, wondering: How did this happen? What can we do? So Sexy So Soon is an invaluable and practical guide for parents who are fed up, confused, and even scared by what their kids--or their kids' friends--do and say. Diane E. Levin, Ph.D., and Jean Kilbourne, Ed.D., internationally recognized experts on early childhood development and the impact of the media on children and teens, understand that saying no to commercial culture--TV, movies, toys, Internet access, and video games--isn't a realistic or viable option for most families. Instead, they offer parents essential, age-appropriate strategies to counter the assault. For instance: 1) help your children expand their imaginations by suggesting new ways for them to play with toys--for example, instead of "playing house" with dolls, they might send their toys on a backyard archeological adventure; 2) Counteract the narrow gender stereotypes in today's media: ask your son to help you cook; get your daughter outside to play ball; 3) Share your values and concerns with other adults--relatives, parents of your children's friends--and agree on how you'll deal with TV and other media when your children are at one another's houses. Filled with savvy suggestions, helpful sample dialogues, and poignant true stories from families dealing with these issues. So Sexy So Soon provides parents with the information, skills, and confidence they need to discuss sensitive topics openly and effectively so their kids can just be kids. (PsycINFO Database Record (c) 2012 APA, all rights reserved)

AD - Levin, Diane E.: Wheelock College, Boston, MA, US Kilbourne, Jean: Wellesley Centers for Women, MA, US

ER -

TY - JOUR

ID - 661

T1 - A multicomponent intervention to increase peer-directed communication in Head Start children.

[References]

A1 - Stanton-Chapman, Tina L.

Y1 - 2008///

N1 - Peer Reviewed Journal: 2008-07241-002

English

Journal; Peer Reviewed Journal

KW - PsycInfo

KW - Peers

KW - Project Head Start

KW - Reading

KW - Social Skills

KW - Language

KW - Pragmatics

KW - Vocabulary

RP - NOT IN FILE

SP - 188

EP - 212

JF - Journal of Early Intervention

VL - 30:

IS - 3

N2 - The effects of a multicomponent intervention strategy to increase peer-directed social communication in eight Head Start children at risk for poor language and social skill development were examined. The intervention consisted of three components: (a) a planning period, including reading a storybook that illustrated the play theme and use of the social pragmatic communication strategies, practice using vocabulary to be used in play, and choosing roles for the thematic activity; (b) a 10-min play session in which the interventionist coached children to interact while they played with the thematic related toys; and (c) a brief reporting period in which children reviewed their use of the social pragmatic strategies and specific vocabulary. A multiple-baseline design across dyads with pre- and postgeneralization probes was employed. Children increased their use of peer-directed communication over baseline levels, target vocabulary words, and other social pragmatic skills. (PsycINFO Database Record (c) 2012 APA, all rights reserved) (journal abstract)

SN - 1053-8151

AD - Stanton-Chapman, Tina L.: Vanderbilt University, Nashville, TN, US Kaiser, Ann P.: Vanderbilt University, Nashville, TN, US Vijay, Prathibha: Vanderbilt University, Nashville, TN, US Chapman, Carol: Vanderbilt University, Nashville, TN, US  
ER -

TY - JOUR

ID - 662

T1 - Is exposure to media violence a public-health risk?

A1 - No,authorship indicated

Y1 - 2008///

N1 - Peer Reviewed Journal: 2008-04585-001

English

Journal; Peer Reviewed Journal

KW - PsycInfo

KW - Computer Games

KW - Mass Media

KW - Violence

KW - Public Health

RP - NOT IN FILE

SP - 1137

JF - The Lancet

VL - 371:

IS - 9619

N2 - For video game fans in the UK, this month sees the release of the much anticipated Manhunt 2 and Grand Theft Auto IV. The earlier versions of these so-called video nasties hit the headlines when their makers were taken to task over whether the violent nature of their games provoked real-life killings. The effects of violence in video games on negative behaviour in children and adolescents have been intensely studied and debated. There is a need for observational studies on what children actually play and how they play. Given that violence has different cultural contexts in the way it is portrayed, studies in children from ethnic minorities would be valuable in increasing our knowledge. Attention to identifying higher-risk groups, such as children with depression and behavioural and mental health problems, and those exposed to real-world violence, could yield possible markers for abnormal behaviour. (PsycINFO Database Record (c) 2012 APA, all rights reserved)

SN - 0140-6736

ER -

TY - JOUR

ID - 663

T1 - Play, aggression, the preschool child, and the family: A review of literature to guide empirically informed play therapy with aggressive preschool children. [References]

A1 - Davenport,Becky R.

Y1 - 2008///

N1 - Peer Reviewed Journal: 2008-04333-002

English

Journal; Peer Reviewed Journal

KW - PsycInfo

KW - Aggressive Behavior

KW - Behavior Problems

KW - Childhood Development

KW - Childhood Play Behavior

KW - Play Therapy

KW - Family

RP - NOT IN FILE

SP - 2

EP - 23

JF - International Journal of Play Therapy

VL - 17:

IS - 1

N2 - Preschool-aged children displaying high levels of aggression repeatedly have been shown to be at significant risk for continued behavior problems and other social and emotional challenges throughout their lifetimes. The present literature review seeks to summarize and integrate findings across the fields of developmental psychology, family studies, child development, and play therapy to inform play therapists' practices with this population. Specifically, findings from research in these fields hold substantial implications for empirically informed ways in which play therapists can include parents within play therapy processes. Affective quality of parent- child interactions emerges as the common theme across all existing literature and is emphasized as a critical focus for play-based therapeutic intervention. Topics for future research by play therapists focusing on this population are suggested. (PsycINFO Database Record (c) 2012 APA, all rights reserved) (journal abstract)

SN - 1555-6824

AD - Davenport, Becky R.: Department of Counseling and Human Services, St. Mary's University, San Antonio, TX, US

ER -

TY - JOUR

ID - 666

T1 - A "multitude" of solitude: A closer look at social withdrawal and nonsocial play in early childhood.

[References]

A1 - Coplan,Robert J.

Y1 - 2007///

N1 - Peer Reviewed Journal: 2009-06146-006

English

Journal; Peer Reviewed Journal

KW - PsycInfo

KW - Childhood Play Behavior

KW - Early Childhood Development

KW - Social Isolation

KW - Timidity

RP - NOT IN FILE

SP - 26

EP - 32

JF - Child Development Perspectives

VL - 1:

IS - 1

N2 - It has long been argued that social withdrawal in early childhood is a risk factor for later socioemotional difficulties. However, in recent years, researchers have begun to make distinctions between types of social withdrawal in young children, including shyness, social disinterest, and social avoidance. In this article, we review the literature on multiple forms of social withdrawal in early childhood. In particular, we focus on (a) theoretical and empirical distinctions between shyness, social disinterest, and social avoidance; (b) links between these constructs and children's social and nonsocial play behaviors with peers; and (c) implications for children's psychosocial adjustment. As well, we provide suggestions for future research, particularly on the relatively understudied construct of social disinterest and the virtually unexplored phenomenon of social avoidance. (PsycINFO Database Record (c) 2012 APA, all rights reserved) (journal abstract)

SN - 1750-8592

AD - Coplan, Robert J.: Carleton University, Ottawa, ON, Canada Armer, Mandana: Carleton University, Ottawa, ON, Canada

ER -

TY - JOUR

ID - 667

T1 - Changes in parenting and mental health among mothers in early head start

A1 - Berkule,Samantha Brooke

Y1 - 2007///

N1 - Dissertation Abstract: 2007-99018-050

English

Dissertation Abstract

KW - PsycInfo

KW - Mental Health

KW - Mother Child Relations

KW - Parenting Skills

KW - Project Head Start

KW - Mothers

RP - NOT IN FILE

SP - 1958

JF - Dissertation Abstracts International: Section B: The Sciences and Engineering

VL - 68:

IS - 3-B

N2 - This study examined maternal mental health and dimensions of mother-child interaction in 46 low-income, Latino mothers who participated in a relationship-based Early Head Start (EHS) program with their infants and toddlers over the course of 1 years. Children were approximately 1-year-old at enrollment in EHS and the beginning of the study, and were approximately 2.5 years of age at the conclusion of the study. Observed dimensions of parenting behaviors were assessed during structured play interactions of mothers with their children. Maternal depressive symptoms were measured using the Center for Epidemiological Studies - Depression Scale (CES-D; Radloff, 1977). Parental stress and depression, and perceptions about social support were collected during self-report interview measures, using the Short Form of the Parenting Stress Index (PSI-SF; Abidin, 1986) and the Vaux Social Support Record (SSR; Vaux, 1985) respectively. Observational play measures and interview measures were collected at the time of enrollment in EHS (baseline) and again after 18 months of participation in EHS (outcome). Results showed significant increases in positive dimensions of parenting from enrollment to outcome, as reflected in maternal sensitivity, flexibility, autonomy support, positive affect, and significant decreases in maternal intrusiveness. In addition, changes in dimensions of mothers' positive parenting and intrusiveness during structured play with their children differed depending on the level of mental health risk of mothers at the time of enrollment in EHS, with depressed mothers showing more significant decreases in intrusiveness. In addition, after 18 months of participation in EHS, maternal depression and stress related to parenting were significantly reduced, and mothers reported a significant increase in the number of individuals who gave them advice. Despite a lack of detailed information concerning participants' attendance of EHS and utilization of its services, and a small participant sample size, these results are noteworthy. These findings highlight the importance of offering relationship-based interventions in order to improve parenting behaviors. These findings also illuminate the importance of screening mothers for depression, as well as offering mental health services and prevention models which address mental health issues, within the context of relationships. (PsycINFO Database Record (c) 2012 APA, all rights reserved)

SN - 0419-4217

AD - Berkule, Samantha Brooke: Yeshiva U., US

ER -

TY - JOUR

ID - 669

T1 - A review of the effects of sleep position, play position, and equipment use on motor development in infants. [References]

A1 - Pin,Tamis; Eldridge,Beverley; Galea,Mary

Y1 - 2007///

N1 - Peer Reviewed Journal: 2007-18585-014

English

Journal; Peer Reviewed Journal

KW - PsycInfo

KW - Childhood Play Behavior

KW - Infant Development

KW - Motor Development

KW - Sleep

RP - NOT IN FILE

SP - 858

EP - 867

JF - Developmental Medicine &amp; Child Neurology

JA - Dev.Med Child Neurol.

VL - 49:

IS - 11

N2 - Since 1992, parents have been urged to place their infants on their back when asleep. The resulting lack of experience in a prone position appears to cause developmental delay in infants. Use of various infant equipment, except baby walkers, has not been examined thoroughly to establish their influence on the motor development of infants. The aim of this systematic review was to evaluate the effects of sleep and play positions, and use of infant equipment, on motor development. Nineteen studies with evidence at level II were selected against the selection criteria and scored against the Physiotherapy Evidence Database scale. Despite the generally poor methodological quality, the studies have consistently shown that there was transient delay in motor development for healthy term and low-risk preterm infants who were not exposed to the prone position or who did not use infant equipment. However, most of these infants walked unaided within a normal time frame. Limited evidence was found for the effect on more vulnerable infants. More rigorous longitudinal studies using outcome measures focusing on movement quality are recommended to understand any long-lasting influence on the motor skills in these infants. (PsycINFO Database Record (c) 2012 APA, all rights reserved) (journal abstract)

SN - 0012-1622

AD - Pin, Tamis: School of Physiotherapy, University of Melbourne, Melbourne, VIC, Australia Eldridge, Beverley: Physiotherapy Department, Royal Children's Hospital, Melbourne, VIC, Australia Galea, Mary P.: School of Physiotherapy, University of Melbourne, Melbourne, VIC, Australia

ER -

TY - JOUR

ID - 670

T1 - Affective disorders during childhood and adolescence. [German]. [References]

A1 - von Klitzing,Kai

Y1 - 2007///

N1 - Peer Reviewed Journal: 2007-17658-002

German

Journal; Peer Reviewed Journal

KW - PsycInfo

KW - Adolescent Development

KW - Affective Disorders

KW - Childhood Development

KW - Etiology

KW - Psychopathology

KW - Symptoms

RP - NOT IN FILE

SP - 287

EP - 304

JF - Kinderanalyse

VL - 15:

IS - 4

N2 - The role of emotional symptoms (depression, anxiety) in different phases of childhood and adolescent development are discussed from a developmental psychopathology perspective. Infants can become depressive as a result of a relational environment which is not good enough. Whether they can have primary depression is still an open question. On the other hand, feelings of depression and anxiety play an important role also in normal development. In preschool and early school children, play inhibition is a central symptom which can indicate the presence of depression and anxiety. In empirical studies, we found a tendency to exaggerated empathy in combination with rigid defence mechanisms and avoidance being prominent in many depressed children, especially girls. In adolescence, the decreasing cathexis of the primary objects and the insecure body concepts enhance the risk of becoming depressed. The role of interpersonal, intrapsychic, and biological factors as well as their interaction among each other in the aetiology of affective disorders in childhood and adolescence is discussed. (PsycINFO Database Record (c) 2012 APA, all rights reserved) (journal abstract)



SN - 0942-6051

AD - von Klitzing, Kai: Universitätsklinikum Leipzig, Klinik und Poliklinik für Psychiatrie, Psychotherapie und Psychosomatik des Kindes- und Jugendalters, Leipzig, Germany

ER -

TY - JOUR

ID - 671

T1 - Teaching skills to second and third grade children to prevent gun play: A comparison of procedures.

[References]

A1 - Kelso, Pamela D.

Y1 - 2007///

N1 - Peer Reviewed Journal: 2007-11879-002

English

Journal; Peer Reviewed Journal

KW - PsycInfo

KW - Childhood Play Behavior

KW - Firearms

KW - Injuries

KW - Teaching

KW - Behavior Modification

KW - Safety

KW - Self Report

RP - NOT IN FILE

SP - 29

EP - 48

JF - Education & Treatment of Children

VL - 30:

IS - 3

N2 - A posttest only control group design was used to investigate the effects of two programs to teach firearm injury prevention skills to second and third grade children. Children were taught the safety skills "Stop. Don't touch. Leave the area. Tell an adult." should they ever find a firearm. The effectiveness of the National Rifle Association's Eddie Eagle GunSafe Program (Level Two) was compared to a Behavioral Skills Training (BST) procedure in reducing gunplay behaviors. Participants were trained according to either the Eddie Eagle program or the BST procedure in one session lasting forty-five minutes to an hour. Self-report, role-play, and in-situ assessments were used to determine the effects of each treatment. Those children not demonstrating the target skills at assessment received an additional in-situ training session and a second assessment. Findings showed that (a) both programs were successful in teaching children to verbally state the target behaviors as compared to the control group; (b) the Behavioral Skills Training program and the Eddie Eagle program were equally effective in teaching children to role-play the skills, and the Behavioral Skills Training group was superior to the control group; (c) there were no differences among any of the conditions in regards to measures of in-situ assessment; and (d) children in each group varied on the amount of in-situ training sessions needed before displaying the target behavior. (PsycINFO Database Record (c) 2012 APA, all rights reserved) (journal abstract)

SN - 0748-8491

AD - Kelso, Pamela D.: North Dakota State University, Fargo, ND, US Miltenberger, Raymond G.: North Dakota State University, Fargo, ND, US Waters, Marit A.: North Dakota State University, Fargo, ND, US Egemo-Helm, Kristin: North Dakota State University, Fargo, ND, US Bagne, Angela G.: North Dakota State University, Fargo, ND, US

ER -

TY - JOUR

ID - 673

T1 - One-year internal consistency of the infant/toddler Home Inventory in a low risk infant group of Mexico City and its metropolitan zone. [Spanish]. [References]

A1 - Zanabria-Salcedo, Martha; Marquez-Caraveo, Maria Elena; Perez-Martinez, Antonio; Mendez-Ramirez, Ignacio

Y1 - 2007///

N1 - Peer Reviewed Journal: 2007-08665-009

Spanish

Journal; Peer Reviewed Journal

KW - PsycInfo

KW - Home Care

KW - Infant Development

KW - Psychometrics

KW - Risk Factors

KW - Test Reliability

KW - Inventories

RP - NOT IN FILE

SP - 67

EP - 73

JF - Salud Mental

VL - 30:

IS - 2

N2 - Summary: As the environment is a crucial source in an infant's development, it is important to assess the proximal environment where a variety of social relationships take place. The home concept and its influence on development led to the discovery and interrelations of several dimensions and today's emphasis relies on identifying the mechanisms of the variability of environment that exert an influence on the variability of development. The purpose of this investigation was to establish the internal consistency of the Infant/Toddler HOME Inventory in the version adapted by Cravioto through the assessment of the precision of its scoring in terms of internal consistency. Cohort: 62 infants and their mothers were contacted in the first 72 hours after delivery through a Research Program. Instrument: The Infant/Toddler HOME Inventory, version adapted by Cravioto, with 62 items in a binary format response was used. Subscale VII, Play Materials, asked about color, size, consistency or texture and type of toys. Results showed that alpha coefficient's values higher than 0.60 throughout the 12 months were observed in the VII Play Materials shoed a range of 0.64 and 0.84, and 0.60 and 0.83 for the Total Scale. Results showed the Infant/Toddler HOME Inventory had high internal consistency values in the Total Scale. Limitations in this study are not only this modification, but the size sample, and future research efforts should overcome this fact by trying to sample infants from different Mexican regions. This study points out the need to adapt, develop and evaluate psychometrically instruments that measure specific aspects of the environment of infant's homes. (PsycINFO Database Record (c) 2012 APA, all rights reserved)

SN - 0185-3325

AD - Zanabria-Salcedo, Martha: Departamento de Educacion y Comunicacion, Universidad Autonoma Metropolitana, Unidad Xochimilco, Tlalpan, Mexico Marquez-Caraveo, Maria Elena: Division de Investigacion, Hospital Psiquiatrico Infantil Dr. Juan N. Navarro, SSA, Mexico Perez-Martinez, Antonio: Egresado de la Maestria en Rehabilitacion Neurologica, Universidad Autonoma Metropolitana, Unidad Xochimilco, Tlalpan, Mexico Mendez-Ramirez, Ignacio: Instituto de Investigaciones en Matematicas Aplicadas y en Sistemas, Universidad Nacional Autonoma de Mexico, Mexico, Mexico

ER -

TY - JOUR

ID - 674

T1 - Parents-child role reversal in trilogue play: Case studies of trajectories from pregnancy to toddlerhood.

[References]

A1 - Fivaz-Depeursinge,E; Frascarolo,

Y1 - 2007///

N1 - Peer Reviewed Journal: 2007-03646-002

English

Journal; Peer Reviewed Journal

KW - PsycInfo

KW - Childhood Development

KW - Parent Child Relations

KW - Role Taking

KW - Needs

KW - Risk Factors

RP - NOT IN FILE

SP - 17

EP - 31

JF - Attachment & Human Development

JA - Attach.Hum.Dev.

VL - 9:

IS - 1

N2 - Role reversal, whereby a child attempts to meet her parent's adult needs for parenting, intimacy, or companionship, has been identified as a risk factor for developmental disturbances. It has been defined from diverse perspectives as a child attachment strategy, a parent-toddler relational disturbance, and a boundary disturbance between parents and child. The recently discovered infant's triangular capacity, namely the sharing of her attention and affects with both parents, allows one to analyse the infant's contribution to early family dynamics. Role reversal was detected in 4 out of 45 father-mother-infant interactions observed in triologue play from pregnancy to toddlerhood. The developmental trajectories towards role reversal are explored by means of case analyses. Results are compared with cases of problematic triangulation encountered in die same sample. In role reversal, family interactions are rigidly organized around a "two against one" coalition, whereby the normative hierarchy between parents and child is reversed. The child's triangular capacity is overactivated, controlling the tension between her parents by provocation-animation strategies. (PsycINFO Database Record (c) 2012 APA, all rights reserved) (journal abstract)

SN - 1461-6734

AD - Fivaz-Depeursinge, E.: University of Lausanne, Lausanne, Switzerland Frascarolo, F.: University of Lausanne, Lausanne, Switzerland Lopes, F.: University of Lausanne, Lausanne, Switzerland Dimitrova, N.: University of Lausanne, Lausanne, Switzerland Favez, N.: University of Lausanne, Lausanne, Switzerland

ER -

TY - JOUR

ID - 675

T1 - In Defense of Child's Play. [References]

A1 - Hawes,David J.

Y1 - 2007///

N1 - Electronic Collection: 2007-01907-001

English

Electronic Collection

KW - PsycInfo

KW - Child Psychology

KW - Childhood Development

KW - Childhood Play Behavior

KW - Educational Psychology

KW - Learning

RP - NOT IN FILE

JF - PsycCRITIQUES

VL - 52:

IS - 19

N2 - Reviews the book, *Play = Learning: How Play Motivates and Enhances Children's Cognitive and Social-Emotional Growth*, edited by Dorothy G. Singer, Roberta Michnick Golinkoff, and Kathy Hirsh-Pasek (see record 2006-10812-000). Play has been the subject of some of the most influential writings in child psychology, with iconic texts from figures such as Jean Piaget and Donald Winnicott establishing it as a major theme in both the developmental and clinical child literature. The volume essentially follows two broad premises. The first is that play for the sake of play is disappearing from childhood, much to the detriment of children's development and mental health. The second is that children's play has the potential to greatly inform early childhood practice and to be used more effectively in meeting academic and therapeutic needs both at the population level and with at-risk groups. A running theme throughout the book is the popular tendency (past and present) to dichotomize play and what has been termed the "real work" of learning. The book begins by examining the ways in which this conceptualization has shaped current practices in education and child rearing. An opening chapter by Edward Zigler, a founder of Head Start, provides an insightful backdrop for this discussion. The succeeding chapters of the book examine empirical evidence for the importance of play to specific cognitive and affective

domains of development, especially competencies key to school readiness and achievement. (PsycINFO Database Record (c) 2012 APA, all rights reserved)

SN - 1554-0138

ER -

TY - JOUR

ID - 676

T1 - Outdoor play spaces in Canada: The safety dance of standards as policy. [References]

A1 - Herrington,Susan

Y1 - 2007///

N1 - Peer Reviewed Journal: 2007-01307-006

English

Journal; Peer Reviewed Journal

KW - PsycInfo

KW - Childhood Play Development

KW - Government Policy Making

KW - Playgrounds

KW - Safety

KW - Child Day Care

RP - NOT IN FILE

SP - 128

EP - 138

JF - Critical Social Policy

VL - 27:

IS - 1

N2 - Over the past decade the outdoor play spaces designed for children in Canada have been largely shaped by fear and profit, rather than by what we know about children's play and development. Since the early 1980s the Canadian Standards Association (CSA) has played an increasingly important role in this transformation as their technical standards for children's outdoor play spaces have been gradually adapted as policy by local and regional agencies. While the CSA has historically regulated industrial and commercial projects that enable international trade and harmonization with countries such as the United States, their extension of influence to early childhood is problematic; particularly when applied to childcare centres. The following describes some of the issues that arise from the use of safety standards as policy, and the problems these standards cause when applied to childcare centres. (PsycINFO Database Record (c) 2012 APA, all rights reserved) (journal abstract)

SN - 0261-0183

AD - Herrington, Susan: School of Architecture and Landscape Architecture, University of British Columbia, Vancouver, BC, Canada Nicholls, Jamie: School of Architecture and Landscape Architecture, University of British Columbia, Vancouver, BC, Canada

ER -

TY - JOUR

ID - 677

T1 - Superheroes in play therapy with an attachment disordered child. [References]

A1 - Wenger,Carmela

Y1 - 2007///

N1 - Book: 2007-00887-010

English

Book; Edited Book

KW - PsycInfo

KW - Attachment Disorders

KW - Diagnosis

KW - Heroes

KW - Measurement

KW - Play Therapy

KW - Fantasy

RP - NOT IN FILE

SP - 193

EP - 211

JF - Rubin, Lawrence C [Ed]

VL - :

IS - 2007

N2 - (create) Carmela Wenger explores and demonstrates the usefulness of superheroes in the assessment, diagnosis, and treatment of a young male client with reactive attachment disorder. The focus of treatment was on improving the quality of interaction between Damien and his adoptive parents and siblings. The stages of play therapy with Damien paralleled the course of healthy development, moving from the establishment of trust to exploration, risk taking, and ultimately more mature levels of cognitive and affective processing. (PsycINFO Database Record (c) 2012 APA, all rights reserved)

ER -

TY - JOUR

ID - 678

T1 - The Play Paradox: Can Scientists Study Play Playfully? [References]

A1 - Ault,Ruth L.

Y1 - 2007///

N1 - Electronic Collection: 2006-22676-001

English

Electronic Collection

KW - PsycInfo

KW - Childhood Play Behavior

KW - Childhood Play Development

KW - Games

KW - Fantasy

KW - Toys

RP - NOT IN FILE

JF - PsycCRITIQUES

VL - 52:

IS - 2

N2 - Reviews the book, *The Development of Play* (3rd ed.) by David Cohen (see record 2006-06577-000). The chapters at the heart of the book cover traditional play topics. After the introductory chapter, Cohen briefly reviews historical writers' ideas about play, beginning with Aristotle, Plato, and Rousseau. Chapter 3, "Playing With Objects," gives an overview of Piaget's (1962) seminal work on imitation and the beginning of pretend play during the sensorimotor and preoperational periods and takes potshots at various empirical studies of how children play with toys (mostly as adjuncts to pretend play), because "the whole dynamics of the game are out of the children's control: adults run it" (p. 44). Chapter 4, "Playing With Other Children," likewise covers pretend play, with or without others; rough and tumble play among boys; and preschoolers' performance on appearance-reality and false belief tasks, which abilities children can learn through play (as well as through other types of interactions). Chapter 5, titled "Pretending," repeats many of the earlier themes. Throughout these early chapters, Cohen indicates how most play research follows three major traditional directions in ascribing cognitive, emotional (therapeutic), and social functions to play. He identifies additional aspects that ought to receive more research attention: cultural aspects of play, play among adults, and how television and the toy industry affect children's toy selection and play. In chapter 6 Cohen presents extended examples of the play of his sons at home when they were under age six. Apparently, this material formed much of his doctoral work and closely resembles the presentation in the previous two editions of *The Development of Play*. The first half of Chapter 7 reviews play therapy from the psychoanalytic perspective, which Cohen criticizes for not being empirically supported and for not enhancing the parent-child bond, because therapists routinely exclude parents from therapy sessions. The second half of Chapter 7 concerns the well-documented findings that children with autism play predominantly with objects, often in rigid, stereotyped ways, and lack pretend play. Cohen's examination of adult games in Chapter 8 starts with historical reasons why psychologists have neglected the topic. The four subsequent areas of Cohen's focus are sports (especially risky ones), computer and fantasy games, functionless knickknacks or consumer toys, and personal growth games. (PsycINFO Database Record (c) 2012 APA, all rights reserved)

SN - 1554-0138

ER -

TY - JOUR

ID - 679

T1 - Wanna play: Friendship skills for preschool and elementary grades

A1 - Ross,Ruth Herron; Roberts-Pacchione,Beth

Y1 - 2007///

N1 - Book: 2006-20765-000

English

Book; Authored Book

(Created by PsycINFO) (Abbreviated) Acknowledgments About the Authors Introduction: Welcome to the Wanna Play Program Guidelines for Curriculum Success How to Use This Book Social Interaction Checklist

Unit 1: Discovering Friendship Unit 2: Making Eye Contact for Interaction Unit 3: Being a Friend Unit 4: Appropriate Body Behavior Unit 5: Interacting in a Group Unit 6: Playing Games Appendix A: Friendship Cards Appendix B: Worksheets

KW - PsycInfo

KW - Developmental Disabilities

KW - Friendship

KW - Individual Education Programs

KW - Social Skills

KW - Teaching

RP - NOT IN FILE

SP - Thousand

JF - (2007)

VL - Wanna play: Friendship skills for preschool and elementary grades. vii, 205 pp. Thousand Oaks, CA, US: Corwin Press; US.

N2 - (from the cover) Youngsters at risk or with developmental delays or disabilities may experience considerable difficulty in learning how to make friends. This practical teacher resource presents the Wanna Play Program, a curriculum devoted specifically to helping PreK-3 students develop the social skills they need to interact appropriately with individuals and groups. This parent- and teacher-friendly handbook provides over 60 lesson plans involving more than 300 games and activities. With dozens of reproducibles, it offers many instructional options for teachers, including: lesson plans outlining teaching concepts, objectives, and attitudinal approaches; links to Individual Education Program (IEP) goals and reporting categories; practical, flexible methods of engaging young students in developing friendship skills; and constructive advice for teaching children who exhibit difficult behavior but may not have been diagnosed with a disability. (PsycINFO Database Record (c) 2012 APA, all rights reserved)

AD - Ross, Ruth Herron: Wanna Play program, PA, US Roberts-Pacchione, Beth: Wanna Play program, PA, US

ER -

TY - JOUR

ID - 680

T1 - Examinations of social and non-social factors in the neurodevelopment of autism

A1 - Mccleery,Joseph Paul

Y1 - 2006///

N1 - Dissertation Abstract: 2006-99024-212

English

Dissertation Abstract

KW - PsycInfo

KW - Autism

KW - Brain

KW - Neural Development

KW - Social Processes

RP - NOT IN FILE

SP - 3484

JF - Dissertation Abstracts International: Section B: The Sciences and Engineering

VL - 67:

IS - 6-B

N2 - Autism is a pervasive developmental disorder characterized by deficits in social and communication skills, as well as restricted interests and repetitive behaviors, with symptom onset by 3 years of age. Recent studies have documented structural and functional abnormalities in a variety of brain regions associated with social processing and perception in this population. As a result, there is a growing belief that autism can be explained by impairment in social brain systems, and several neurodevelopmental models have been proposed to explain the social and communicative impairments of individuals with autism. The current research explores the role social and non-social factors play in the neurodevelopmental basis of autism in three studies of functional brain development. Study 1 examines social and non-social semantic integration in young children with autism by analyzing event-related potentials recorded during the processing of word and environmental sound meaning within a picture context. Results suggest that the neural integration of word, but not environmental sound, meaning is impaired in these children, providing support for a social/non-social distinction in this area of functioning. Experiments 2 and 3 explore the early functional development of brain systems involved in face and object processing in the first year of life in autism by studying neurodevelopmental risk in infant siblings of children diagnosed with autism. Specifically, experiment 2 employs event-related potentials to examine the neural correlates of early stages of face and object processing in 10-month old infants, and experiment 3 employs visual psychophysical measures to assess the integrity of the magnocellular and parvocellular visual pathways in 6-month old infants. The results of experiment 2 suggest that familial risk for autism is associated with abnormalities in face and object processing in the first year of life. The results of experiment 3 suggest that familial risk for autism is also associated with abnormalities in the subcortical magnocellular visual pathway, which is believed to provide critical input for face processing in the first several months of life. Together, these results provide new insight into the roles social and non-social factors may play in the neurodevelopment bases of autism. (PsycINFO Database Record (c) 2012 APA, all rights reserved)

SN - 0419-4217

AD - Mccleery, Joseph Paul: U California, San Diego, US

ER -

TY - JOUR

ID - 681

T1 - Violence exposure, play characteristics, and behavior in a sample of six-year-old children

A1 - Weigand Michener, Kristen Elizabeth

Y1 - 2006///

N1 - Dissertation Abstract: 2006-99014-233

English

Dissertation Abstract

KW - PsycInfo

KW - Behavior Problems

KW - Childhood Play Behavior

KW - Lower Income Level

KW - Violence

KW - Emotional States

KW - Imagination

KW - Parents

KW - Teachers

RP - NOT IN FILE

SP - 565

JF - Dissertation Abstracts International: Section B: The Sciences and Engineering

VL - 67:

IS - 1-B

N2 - Violence exposure is a prevalent problem, especially in low-income, urban communities. Children are at risk for exposure and the negative psychological and behavioral sequelae. Several studies have shown that victims of violent acts display more externalizing behavior problems whereas witnesses to violence display more internalizing behavior problems. In young children, play reflects a child's emotional state and behavioral strategies. In the present study, play characteristics, defined by aggressive affective themes, organization, and imagination were examined in the fantasy play of children exposed to violence. The purposes of the present

study were to: (1) examine aggressive affective themes, organization, and imagination of children exposed to violence utilizing a formalized measure of play; and (2) to examine the relationship between behavior observed during a standardized play assessment and child behavior as rated by parents and teachers; and (3) explore the relative strength of aggressive affective themes, organization, and imagination in play in predicting behavior problems. Contrary to initial hypotheses, there were few significant group differences on several of the constructs of play, including aggressive affect, organization and imagination. Significant findings included that the interaction of violence exposure type and severity of exposure predicted mean differences in organization of play. Higher frequencies of aggressive affect and total negative affect were significantly positively correlated with externalizing behavior problems, as reported by teachers. As in many previous studies, boys demonstrated significantly more aggressive affect than girls during the play task. Finally, neither gender, aggressive affect, quality of play organization, or their interactions accounted for significant, independent variance for any behavioral problems reported by caregivers or teachers. The study had several limitations, with the most salient being lack of sample variance. Future studies should address that as well as measure limitations. In a clinical context, the use of play to assess a child's ability to express and modulate different affective states in an imaginative, organized story in order to bolster coping and adjustment, emotional understanding, and interpersonal functioning can offer mechanisms to reduce symptoms and increase psychological wellness. (PsycINFO Database Record (c) 2012 APA, all rights reserved)

SN - 0419-4217

AD - Weigand Michener, Kristen Elizabeth: Kent State U., US

ER -

TY - JOUR

ID - 682

T1 - Parental stress, parenting behavior and observed parent-child interaction

A1 - Adams, Katrina L.

Y1 - 2006///

N1 - Dissertation Abstract: 2006-99012-084

English

Dissertation Abstract

KW - PsycInfo

KW - Dyads

KW - Parent Child Communication

KW - Parental Role

KW - Parents

KW - Stress

KW - Social Support

RP - NOT IN FILE

SP - 6911

JF - Dissertation Abstracts International: Section B: The Sciences and Engineering

VL - 66:

IS - 12-B

N2 - This study investigated the relationship between parental stress, social support, and directly observed parenting behavior and dyadic interaction in a non-clinical sample of 26 parent-child dyads, in which the child was age five or younger. This study also explored the differential impact of various types of stress on parenting behavior and dyadic interaction, including life stress as measured by the Social Readjustment Rating Scale - Revised (SRRS-R), parenting stress as measured by the Parenting Stress Index - Short Form (PSI-SF), and event stress as measured by the Impact of Event Scale - Revised (IES-R). Parenting behavior and dyadic interaction were assessed with selected variables from the Early Relational Assessment (ERA). Exploratory research questions addressed age and developmental trends, the relationship between parental stress and Parent Role Questionnaire (PRQ) ratings, and contextual differences in observed behavior. The findings of this research indicate that various types of stress differentially impact parent, child and dyadic behavior. Specifically, life stress was associated with decreased parental enjoyment, child positive affect, and mutual enjoyment/enthusiasm in both free and structured play. Contrary to expectations, higher event stress was related to more optimal parenting in this "low risk" sample, including increased mirroring, sensitivity/responsivity, flexibility and appropriate structuring of the interaction, as well as improved dyadic reciprocity and organization in free play, perhaps due to activation of an underlying parental reflective-self functioning variable. Parenting



stress was not found to be a strong predictor of parent, child or dyadic behavior. Further, higher social support was related to decreased life stress and better parenting behavior (i.e., enjoyment, positive affect, intrusiveness). The results of this study also suggest that even minimally structured play situations influence a dyad's interactive style. In this study, the PRQ was not significantly related to stress levels or parenting due to the extremely restricted range of ratings. Finally, this study found some evidence of gender and developmental trends in structured play. Clinical implications for work with parents-child dyads and families, limitations of this study, and directions for future research were also discussed. (PsycINFO Database Record (c) 2012 APA, all rights reserved)

SN - 0419-4217

AD - Adams, Katrina L.: Pace U., US

ER -

TY - JOUR

ID - 683

T1 - 'You can't wrap them up in cotton wool!' Constructing risk in young people's access to outdoor play.

[References]

A1 - Jenkins,N.

Y1 - 2006///

N1 - Peer Reviewed Journal: 2006-23168-003

English

Journal; Peer Reviewed Journal

KW - PsycInfo

KW - Parental Attitudes

KW - Risk Factors

KW - Social Desirability

KW - Uncertainty

KW - Risk Assessment

KW - Accidents

KW - Family

KW - Injuries

KW - Judgment

KW - Morale

KW - Morality

RP - NOT IN FILE

SP - 379

EP - 393

JA - Health, Risk & Society

VL - 8:

IS - 4

N2 - Policy approaches towards risk in relation to young people's leisure activities are characterized by uncertainty. While some organizations have sought to emphasize the need to reduce or even eliminate the risk of 'unintentional injuries' in outdoor play, others highlight the dangers in excessively restricting young people's access to the outside world. Drawing on semi-structured interviews with families in the South Wales area, this paper argues that while parents are not in the grips of 'paranoia' (Furedi 2001) they are wrestling with competing sets of social expectations, as well as their own rational and emotive judgments. Young people tended to respond to their parents' concerns by demonstrating their street-wisdom, claiming sanctuary behind the notion of 'accident' and asserting their moral right to access the outside world. (PsycINFO Database Record (c) 2012 APA, all rights reserved) (journal abstract)

SN - 1369-8575

AD - Jenkins, N. E.: Glasgow University, Glasgow, United Kingdom

ER -

TY - JOUR

ID - 684

T1 - Review of Creative Play with Children at Risk

A1 - Hairsine,Jill

Y1 - 2006///

N1 - Peer Reviewed Journal: 2006-20720-010

English

Journal; Peer Reviewed Journal

KW - PsycInfo

KW - At Risk Populations

KW - Childhood Play Behavior

KW - Creativity

KW - Play Therapy

RP - NOT IN FILE

SP - 224

EP - 226

JF - Practice

VL - 18:

IS - 3

N2 - Reviews the book, *Creative Play with Children at Risk* by Sue Jennings (2005). Jennings uses the ideas of embodiment, projection and role to describe different kinds of play, and provides references to her earlier expositions of these ideas for those who wish to explore these more fully. The book presents itself in user-friendly format, spiral bound for ease of use, especially helpful for using the numerous photocopyable worksheets - a bonus for all busy practitioners - and with an end cover flap to more easily mark a page. This book could be used by natural and foster families, as well as by professional children's workers of all kinds, indeed for anyone who spends time with children in their daily lives, and is not solely relevant for children acknowledged to be especially at risk. The principles and ideas are important for all of us, young and old alike, in a world where childhood gets shorter every year and we are organized into so many formal activities we have no space to let our imaginations soar. It is easy to read and its tone is encouraging throughout. The author's passion for healthy and healing play seems quite contagious, prompting her readers to expand their repertoire of direct work skills and let their imaginations fly. (PsycINFO Database Record (c) 2012 APA, all rights reserved)

SN - 0950-3153

AD - Hairsine, Jill: *Children and Lifelong Learning*, STS, United Kingdom

ER -

TY - JOUR

ID - 685

T1 - My Magic Story Car: Video-Based Play Intervention to Strengthen Emergent Literacy of At-Risk Preschoolers. [References]

A1 - Bellin,Harvey F.

Y1 - 2006///

N1 - Book: 2006-10812-006

English

Book; Edited Book

KW - PsycInfo

KW - At Risk Populations

KW - Childhood Play Behavior

KW - Early Intervention

KW - Literacy Programs

KW - Preschool Students

KW - Early Childhood Development

KW - Imagination

KW - Lower Income Level

KW - Videotapes

RP - NOT IN FILE

SP - 101

EP - 123

JF - Singer, Dorothy G [Ed]; Golinkoff, Roberta Michnick [Ed]; Hirsh-Pasek, Kathy [Ed]

VL - :

IS - 2006

N2 - (from the chapter) This chapter focuses on My Magic Story Car, a video-based program that strengthens emergent literacy skills of at-risk preschool children from low-income families through one of the most effective available modalities--make-believe play. The program addresses its objective by interweaving three elements: (a) make-believe play as an intrinsically motivating modality for engaging preschoolers in learning activities, (b) empirical studies of the requisite skills of emergent literacy, and (c) video-based programs as an effective medium for empowering parents and caregivers of poor children with easily replicated, reliable interventions for implementation in any childcare setting. The approaches at the heart of the program outlined in this chapter have proven effective in democratizing and leveling the emergent literacy playing field for at-risk, disadvantaged preschoolers. (PsycINFO Database Record (c) 2012 APA, all rights reserved)

AD - Bellin, Harvey F.: Media Group of Connecticut, Inc., CT, US Singer, Dorothy G.: Department of Psychology, Yale University, New Haven, CT, US

ER -

TY - JOUR

ID - 686

T1 - Safety on the Playground: Mechanisms Through Which Adult Supervision Might Prevent Child Playground Injury. [References]

A1 - Schwebel, David C.

Y1 - 2006///

N1 - Peer Reviewed Journal: 2006-08533-005

English

Journal; Peer Reviewed Journal

KW - PsycInfo

KW - Accident Prevention

KW - Childhood Play Behavior

KW - Injuries

KW - Playgrounds

KW - Safety

RP - NOT IN FILE

SP - 141

EP - 149

JF - Journal of Clinical Psychology in Medical Settings

VL - 13:

IS - 2

N2 - Over 200,000 American children visit the emergency room annually after a playground injury. Among the most promising means to reduce playground injuries is through increased quantity and quality of playground supervision by adults. To implement empirically supported playground supervision interventions, it is essential to understand how supervision prevents injuries. Recent research suggests supervision likely prevents injuries through several different mechanisms; this paper discusses six: (a) Supervisors repetitively teach children playground rules; (b) supervisors recognize and stop children's dangerous behavior; (c) supervisors prevent children from behaving impulsively; (d) the presence of a supervisor causes children to behave differently; (e) supervisors change children's attribution of risk; and (f) supervisors have influence as modelers and persuaders of safe behavior. Theoretical implications for future work and applied implications for the development of playground safety interventions are discussed. (PsycINFO Database Record (c) 2012 APA, all rights reserved) (journal abstract)

SN - 1068-9583

AD - Schwebel, David C.: Department of Psychology, University of Alabama at Birmingham, Birmingham, AL, US

ER -

TY - JOUR

ID - 687

T1 - Sustained Withdrawal Behavior in Clinic-referred and Nonreferred Infants. [References]

A1 - Dollberg, Daphna; Feldman, Ruth; Keren, Miri; Guedeney, Antoine

Y1 - 2006///

N1 - Peer Reviewed Journal: 2006-07569-004

English

Journal; Peer Reviewed Journal

KW - PsycInfo

KW - Infant Development

KW - Mental Health

KW - Mother Child Relations

KW - Withdrawal (Defense Mechanism)

RP - NOT IN FILE

SP - 292

EP - 309

JF - Infant Mental Health Journal

VL - 27:

IS - 3

N2 - To examine the relations between infants' sustained withdrawal behavior and children's mental health status and maternal and child relational behavior, 36 clinic-referred and 43 control infants were evaluated. Families were visited at home, mother-child free play and feeding interactions were videotaped, and mothers completed self-report measures. Interactions were coded for sustained withdrawal using the Alarm Distress Baby Scale (ADBB; Guedeney and Fermanian, 2001) and for global relational patterns with the Coding of Interactive Behavior (CIB; Feldman, 1998). Higher ADBB scores were found for the referred group, with many infants (38.9%) scoring above the clinical cutoff (vs. 11.6% in the control group). More negative relational patterns were found for the withdrawn group in terms of higher maternal intrusiveness, lower reciprocity, and lower child involvement. Associations were found between maternal and child behavior during play and feeding and child sustained withdrawal behavior at play. Sustained withdrawal also was associated with unpredictable child temperament and lower sense of parental self-efficacy. Maternal depressive symptoms were higher in the referred group and correlated with maternal and child relational patterns. The findings contribute to the construct and discriminant validity of the CIB and the ADBB coding systems, and suggest that sustained withdrawal may serve as a risk indicator for early socioemotional disorders. (PsycINFO Database Record (c) 2012 APA, all rights reserved) (journal abstract)

SN - 0163-9641

AD - Dollberg, Daphna: Bar-Ilan University, Ramat-Gan, Israel Feldman, Ruth: Bar-Ilan University, Ramat-Gan, Israel Keren, Miri: Geha Psychiatric Hospital, Israel Guedeney, Antoine: Hospital Bichat-Claude Bernard, AP/HP Paris, Paris, France

ER -

TY - JOUR

ID - 688

T1 - Language Development Subcontexts in Head Start Classrooms: Distinctive Patterns of Teacher Talk During Free Play, Mealtime, and Book Reading. [References]

A1 - Gest,Scott D.

Y1 - 2006///

N1 - Peer Reviewed Journal: 2006-06160-005

English

Journal; Peer Reviewed Journal

KW - PsycInfo

KW - Childhood Play Behavior

KW - Classrooms

KW - Language Development

KW - Project Head Start

KW - Teachers

KW - Mealtimes

KW - Reading

RP - NOT IN FILE

SP - 293

EP - 315

JF - Early Education and Development

VL - 17:

IS - 2

N2 - Research findings. Language development subcontexts within 20 Head Start classrooms were studied by observing teachers' child-directed talk during free play, mealtime, and book reading. In each context, observers coded all child-directed statements, directives, and questions, noted instances of pretend talk and decontextualized talk, and rated the richness and sensitivity-responsiveness of teachers' talk. Rates of child-directed talk were similar across contexts, but the challenging features of teachers' talk varied substantially across contexts: pretend talk occurred almost exclusively during free play, decontextualized talk was most common during mealtime, and ratings of richness were greatest during book reading. Higher rates of pretend talk and decontextualized talk and higher ratings of richness were associated with higher ratings of sensitivity-responsiveness. Rates of child-directed talk did not differ reliably for Lead Teachers and Assistant Teachers. Implications for practice. Professional development efforts may focus productively on helping Head Start teachers to recognize natural opportunities for different types of challenging talk in different classroom contexts. In the majority of classrooms, encouraging teachers to engage in more child-directed talk carries little risk of reducing the quality of sensitive-responsive caregiving. Assistant Teachers play a major role in Head Start classroom language environments and should be included in professional development activities focused on children's language skills. (PsycINFO Database Record (c) 2012 APA, all rights reserved) (journal abstract)

SN - 1040-9289

AD - Gest, Scott D.: Department of Human Development and Family Studies, Pennsylvania State University, University Park, PA, US Holland-Coviello, Rebecca: Department of Human Development and Family Studies, Pennsylvania State University, University Park, PA, US Welsh, Janet A.: Prevention Research Center, Pennsylvania State University, PA, US Eicher-Catt, Deborah L.: Department of Communication Arts and Sciences, Pennsylvania State University, York, PA, US Gill, Sukhdeep: Department of Human Development and Family Studies, Pennsylvania State University, York, PA, US

ER -

TY - JOUR

ID - 689

T1 - Playful "Moments" in Psychotherapy. [References]

A1 - Terr, Lenore C.

Y1 - 2006///

N1 - Peer Reviewed Journal: 2006-05706-012

English

Journal; Peer Reviewed Journal

KW - PsycInfo

KW - Child Psychotherapy

KW - Psychotherapeutic Processes

KW - Childhood Play Behavior

KW - Creativity

KW - Imagination

KW - Psychiatrists

RP - NOT IN FILE

SP - 604

EP - 613

JF - Journal of the American Academy of Child &amp; Adolescent Psychiatry

JA - J Am Acad. Child Adolesc Psychiatry

VL - 45:

IS - 5

N2 - A group of us previously published an article in this journal (Terr et al., 2005) exploring the reasons why some of our child patients dramatically turned around in their psychotherapies. We concluded that the realities of the doctor-patient relationship made a crucial contribution to youthful changes in treatment (how well the psychiatrist followed the child's lead, for example, how willing the psychiatrist was to be "real" when appropriate, and how thoroughly the doctor played out or discussed the child's facts and/or fantasies). In this article, a different group of us once again consider climactic "moments" in children's therapy; this time, we look specifically at how play, playfulness, and creative imagination affect the course of events in treatment. When the doctor's energies are purposefully put to playful pursuits, the young patient may almost instantly become

amenable to treatment. In the cases we present here, no matter what age the child was (three of these young people were teenagers and three were preschoolers), the psychiatrist's attention to play was immediately, implicitly appreciated. Each young patient willingly entered into the game, inside joke, or mutual adventure--no matter how lightly frolicking or darkly ironic it was. (PsycINFO Database Record (c) 2012 APA, all rights reserved)

SN - 0890-8567

AD - Terr, Lenore C.: U California, San Francisco, Fresno, CA, US Deeney, John M.: Oregon Health & Sciences U, Portland, OR, US Drell, Martin: Louisiana State U Medical School, New Orleans, LA, US Gaensbauer, Theodore J.: U Colorado, CO, US Massie, Henry: U California, San Francisco, Fresno, CA, US Minde, Klaus: McGill U, Montreal, PQ, Canada Stewart, George: U California, Berkeley, Berkeley, CA, US Teal, Stewart: U California, Davis, CA, US Winters, Nancy C.: Oregon Health & Sciences U, Portland, OR, US ER -

TY - JOUR

ID - 690

T1 - The Educator's Role in Child and Adolescent Mental Health. [References]

A1 - Waller, Raymond J.

Y1 - 2006//

N1 - Book: 2006-03928-001

English

Book; Edited Book

KW - PsycInfo

KW - Adolescent Development

KW - Childhood Development

KW - Mental Health

KW - Roles

KW - School Based Intervention

KW - Classroom Management

KW - Mental Disorders

KW - Resilience (Psychological)

KW - Teachers

RP - NOT IN FILE

SP - 3

EP - 13

JF - Waller, Raymond J [Ed]

VL - :

IS - 2006

N2 - (from the chapter) Teachers face more challenges today than during any other time. Students present with more challenges than ever before, particularly in the area of mental health needs. Clear evidence suggests that a variety of mental problems are increasing in frequency, and access to and availability of services for students with mental health needs have not improved for decades. In the face of such need, it is easy for educators to accept the responsibility of this burden borne by so many of today's students. But teachers should resist the propensity to shoulder a burden that is outside the purview of their professional training and focus. Educators should acknowledge, however, that they can have a positive impact on children's mental health. Teachers can play an incalculable role in fostering psychological resilience in children, which can serve to protect them from exposure to a variety of risk factors. The strategies suggested in this chapter are classroom techniques that can assist in the development of these protective factors. They are techniques that have been found to be effective, while actually tending to decrease, rather than increase, one's workload. In addition, the impact of protective factors seems to be cumulative so that the more of these strategies a teacher implements, the more protection a student may cultivate. Teachers are among the most involved adults in the lives of children. In our society, physicians maintain a high level of professional prestige, whereas teaching has lost credibility. Ironically, a child may go through life and rarely, if ever, see a physician. The same cannot be said of educators. If a child begins to show symptoms of a mental health problem, teachers are likely to be the first professionals to see them. Thus, teachers can also play an indispensable role in recognition of problems, referral, participation in interdisciplinary planning, advocacy, and monitoring of their students and can do so without making a difficult job impossible. To assist in this, and to fill a void in most teacher training programs, this book is devoted to

helping teachers recognize the most common mental health issues seen in children and adolescents and to offer strategies on how they can help encourage and support all their students. (PsycINFO Database Record (c) 2012 APA, all rights reserved)

AD - Waller, Raymond J.: Piedmont College, Demorest, GA, US Bresson, Diane J.: J. H. House Elementary School, Conyers, GA, US Waller, Katherine S.: Piedmont College, Demorest, GA, US

ER -

TY - JOUR

ID - 691

T1 - Possible relations among congenital blindness, autistic features and maternal interaction style.

[Portuguese]. [References]

A1 - de Sousa, Ana Delias; Bosa, Cleonice Alves; Hugo, Cristina Neves

Y1 - 2006///

N1 - Peer Reviewed Journal: 2006-02868-002

Portuguese

Journal; Peer Reviewed Journal

KW - PsycInfo

KW - Autism

KW - Blind

KW - Childhood Play Behavior

KW - Congenital Disorders

KW - Mother Child Relations

KW - Attention

KW - Stereotyped Behavior

RP - NOT IN FILE

SP - 355

EP - 364

JF - Estudos de Psicologia

VL - 22:

IS - 4

N2 - This study has examined the occurrence of autistic features in children with congenital blindness. Joint attention and symbolic play deficits, and stereotyped body movements were focused. Mother's interaction style was also investigated during playing episodes, while they were trying to engage their children. Eight child-mother dyads, 4 with congenital blindness and 4 sighted children were studied. A home-based interview about child's development and socio-demographic data has been performed, and a free-play session was conducted. Free-play sessions were used for coding both maternal and infant behaviors. The results, that are out of the literature expectations, have brought up only two blind children showed higher play deficits frequencies, and only one mother from the congenital blindness children group who had presented more maternal directive posture compared to the sighted children's mothers. It was also noted the presence of symbolic play in the congenital blindness group. These results suggest that children with congenital blindness may not be at risk, considering the autistic features development, as long as they are properly stimulated by their caregivers who are sensible to their cues and needs. (PsycINFO Database Record (c) 2012 APA, all rights reserved) (journal abstract)

SN - 0103-166X

AD - de Sousa, Ana Delias: Instituto de Psicologia, Universidade Federal do Rio Grande do Sul, Porto Alegre, Brazil Bosa, Cleonice Alves: Programa de Pos-Graduacao em Psicologia, Universidade Federal do Rio Grande do Sul, Porto Alegre, Brazil Hugo, Cristina Neves: Mestranda em Psicologia, Programa de Pos-Graduacao em Psicologia, Universidade Federal do Rio Grande do Sul, Porto Alegre, Brazil

ER -

TY - JOUR

ID - 692

T1 - Understanding Toddlers' In-Home Injuries: I. Context, Correlates, and Determinants. [References]

A1 - Morrongiello, Barbara A.

Y1 - 2004///

N1 - Peer Reviewed Journal: 2004-16924-002

English

Journal; Peer Reviewed Journal

KW - PsycInfo

KW - Child Attitudes

KW - Childhood Play Behavior

KW - Home Accidents

KW - Injuries

KW - Parent Child Relations

KW - Behavior

KW - Parental Attitudes

KW - Risk Taking

KW - SENSATION seeking

RP - NOT IN FILE

SP - 415

EP - 431

JF - Journal of Pediatric Psychology

JA - J Pediatr Psychol.

VL - 29:

IS - 6

N2 - Multimethod strategies (i.e., questionnaires, parents' observations, injury-event recording diaries, telephone and home interviews) were used to study in-home injuries experienced by toddlers over a 3-month period. Cuts, scrapes, and puncture wounds were the most common injuries. The majority of injuries affected children's limbs, and injuries most often occurred in the morning. Boys were injured most often in rooms designated for play, and a majority of their injuries followed from misbehavior. Girls were most often injured in nonplay areas of the home, with the majority of injuries occurring during play activities. Boys experienced more frequent and severe injuries than girls, although girls reacted more than boys to their injuries. Child factors relevant to injury included: risk taking, sensation seeking, and ease of behavior management. Temperament factors did not relate to child injury. Parent factors relevant to child injury included parents' beliefs about control over their child's health, protectiveness, and beliefs about child supervision. Regression analyses revealed that both child (i.e., risk taking) and parent (i.e., protectiveness) factors were significant determinants of child injury. (PsycINFO Database Record (c) 2013 APA, all rights reserved) (journal abstract)

SN - 0146-8693

AD - Morrongiello, Barbara A.: University of Guelph, Guelph, ON, Canada Ondejko, Lisa: University of Guelph, Guelph, ON, Canada Littlejohn, Amanda: University of Guelph, Guelph, ON, Canada

ER -

TY - JOUR

ID - 693

T1 - The influence of child attributes and social-situational context on school-age children's risk taking behaviors that can lead to injury. [References]

A1 - Morrongiello, Barbara A.

Y1 - 2005///

N1 - Peer Reviewed Journal: 2005-07129-006

English

Journal; Peer Reviewed Journal

KW - PsycInfo

KW - Emotions

KW - Interpersonal Influences

KW - Personality Traits

KW - Social Environments

KW - Elementary School Students

KW - Emotional Responses

KW - Fear

KW - Injuries

KW - Peer Relations



KW - SENSATION seeking

KW - Single Sex Environments

RP - NOT IN FILE

SP - 347

EP - 361

JF - Journal of Applied Developmental Psychology

VL - 26:

IS - 3

N2 - Many injuries occur to school-age children when they are allowed independence in decisions about risk taking during play. The present study examined the influence of child attributes (sensation seeking, typical emotional responses in risk situations) and social-situational context (peer presence) on risk taking. Children in the Experimental Group made decisions about risk taking with an unknown same-sex peer present and watching, while those in an age and sex-matched Control Group made decisions without a peer present. Results revealed that children who were high in sensation seeking and typically experienced excitement more than fear in risk situations engaged in greater risk taking. The presence of an observing peer, even though the peer was unknown to the child and said nothing, also was associated with greater risk taking. A regression analysis indicated that risk taking was predicted both from child attributes (sensation seeking) and emotion-based (fear) factors. Theoretical and practical implications of these findings are discussed. (PsycINFO Database Record (c) 2013 APA, all rights reserved) (journal abstract)

SN - 0193-3973

AD - Morrongiello, Barbara A.: Psychology Department, University of Guelph, Guelph, ON, Canada Sedore, Lisa: Psychology Department, University of Guelph, Guelph, ON, Canada

ER -

TY - JOUR

ID - 694

T1 - Impact of Fathers' Alcoholism and Associated Risk Factors on Parent-Infant Attachment Stability From 12 to 18 Months. [References]

A1 - Edwards, Ellen P.

Y1 - 2004///

N1 - Peer Reviewed Journal: 2004-22436-004

English

Journal; Peer Reviewed Journal

KW - PsycInfo

KW - Alcoholism

KW - Attachment Behavior

KW - Children of Alcoholics

KW - Parent Child Relations

KW - Risk Factors

RP - NOT IN FILE

SP - 556

EP - 579

JF - Infant Mental Health Journal

VL - 25:

IS - 6

N2 - This study examined short-term attachment stability and sought to identify predictors of stability and change within a sample characterized by fathers' alcoholism. Results suggest moderate stability of attachment classifications (60% for mothers, 53% for fathers) from 12 to 18 months. Higher paternal and maternal alcohol symptoms, maternal depression, and maternal antisocial behavior were found in families with stable insecure mother-infant attachment compared to those who were stable secure. Mother-infant stable insecurity was associated with higher levels of maternal negative affect expression during play. Father-infant stable insecurity was associated with lower levels of paternal positive affect expression and decreased sensitivity during play. Stable insecure children also had higher levels of negative affect during parent-infant interactions and higher negative emotionality during other episodes compared to stable secure children. Results indicate that infants who were insecure at both time points had the highest constellation of family risk characteristics. (PsycINFO Database Record (c) 2013 APA, all rights reserved) (journal abstract)

SN - 0163-9641

AD - Edwards, Ellen P.: Research Institute on Addictions, University at Buffalo, State University of New York, Buffalo, NY, US Eiden, Rina D.: Research Institute on Addictions, University at Buffalo, State University of New York, Buffalo, NY, US Leonard, Kenneth E.: Research Institute on Addictions, University at Buffalo, State University of New York, Buffalo, NY, US

ER -

TY - JOUR

ID - 696

T1 - Evaluation of behavioral skills training to prevent gun play in children. [References]

A1 - Miltenberger, Raymond G.

Y1 - 2004///

N1 - Peer Reviewed Journal: 2005-00038-008

English

Journal; Peer Reviewed Journal

KW - PsycInfo

KW - Childhood Development

KW - Childhood Play Behavior

KW - Firearms

KW - Prevention

KW - Safety

RP - NOT IN FILE

SP - 513

EP - 516

JF - Journal of Applied Behavior Analysis

JA - J Appl. Behav Anal.

VL - 37:

IS - 4

N2 - This study evaluated behavioral skills training (BST), in a multiple baseline across subjects design, for teaching firearm safety skills to 6 6- and 7-year-old children. Similar to previous research with 4- and 5-year-olds, half of the children acquired the safety skills following BST and half acquired the skills following BST plus in situ training. (PsycINFO Database Record (c) 2013 APA, all rights reserved) (journal abstract)

SN - 0021-8855

AD - Miltenberger, Raymond G.: North Dakota State University, Fargo, ND, US Flessner, Christopher: North Dakota State University, Fargo, ND, US Gatheridge, Brian: North Dakota State University, Fargo, ND, US Johnson, Brigitte: North Dakota State University, Fargo, ND, US Satterlund, Melisa: North Dakota State University, Fargo, ND, US Egemo, Kristin: North Dakota State University, Fargo, ND, US

ER -

TY - JOUR

ID - 698

T1 - Self-efficacy and parenting of high-risk infants: The moderating role of parent knowledge of infant development. [References]

A1 - Hess, Christine Reiner; Teti, Douglas

Y1 - 2004///

N1 - Peer Reviewed Journal: 2004-17945-002

English

Journal; Peer Reviewed Journal

KW - PsycInfo

KW - At Risk Populations

KW - Infant Development

KW - Knowledge Level

KW - Parenting Skills

KW - Self Efficacy

KW - Competence

KW - Mothers

RP - NOT IN FILE

SP - 423

EP - 437

JF - Journal of Applied Developmental Psychology

VL - 25:

IS - 4

N2 - The present study examined the independent and joint relations of parental self-efficacy beliefs and parent knowledge of child development to maternal behavioral competence among mothers of high-risk infants. Sixty-five mothers completed questionnaires regarding parental self-efficacy and knowledge of child development and were assessed for behavioral competence during a 10-min free-play session with their infants. There were no independent contributions of parental self-efficacy or parent knowledge of development in predicting parenting competence. However, the relation between parental self-efficacy and parenting competence was moderated by parent knowledge of development. Consistent with Bandura's [Psychol. Rev. 84 (1977) 191; Am. Psychol. 44 (1989) 1175] formulations, parental self-efficacy and parenting competence were positively associated when parental knowledge of development was high. By contrast, parental self-efficacy beliefs and parenting competence were inversely associated when knowledge of development was low. Mothers reporting high parental self-efficacy, but low knowledge of development, were the least sensitive with their infants in play interactions, suggesting that these mothers were naively confident about their parenting abilities. Implications for designing interventions for naively confident mothers are discussed. (PsycINFO Database Record (c) 2012 APA, all rights reserved) (journal abstract)

SN - 0193-3973

AD - Hess, Christine Reiner: Department of Psychology, University of Maryland, Baltimore County, Baltimore, MD, US Teti, Douglas M.: Human Development and Family Studies, Pennsylvania State University, University Park, PA, US Hussey-Gardner, Brenda: Division of Neonatology, Department of Pediatrics, University of Maryland, Baltimore, MD, US

ER -

TY - JOUR

ID - 700

T1 - Relationships between peer interactive play and social competence in at-risk preschool children.

[References]

A1 - Gagnon,Sandra Glover; Nagle,Richard

Y1 - 2004///

N1 - Peer Reviewed Journal: 2004-10477-001

English

Journal; Peer Reviewed Journal

KW - PsycInfo

KW - Academic Failure

KW - At Risk Populations

KW - Childhood Play Behavior

KW - Psychosocial Development

KW - Social Interaction

KW - Childhood Development

KW - Emotional Development

KW - Peers

KW - Social Skills

RP - NOT IN FILE

SP - 173

EP - 189

JF - Psychology in the Schools

VL - 41:

IS - 2

N2 - Relationships between peer interactive play and social competence in a sample of preschool children (N = 85) considered at risk for academic difficulties were examined. Ratings of peer interactive play and social emotional development were collected from parents and teachers on the Penn Interactive Peer Play Scale and Vineland Social-Emotional Early Childhood Scale. Multivariate techniques revealed significant correlations

between parent and teacher ratings on the measures. Results are discussed within the context of conducting multifaceted, ecological assessments of preschool children. Implications for school psychologists are noted with regard to the important associations between peer interactive play and social-emotional development. The psychometric integrity of the PIPPS is further validated and extended beyond the initial standardization sample to include a sample of primarily Caucasian children living in a more rural area. (PsycINFO Database Record (c) 2012 APA, all rights reserved) (journal abstract)

SN - 0033-3085

AD - Gagnon, Sandra Glover: Appalachian State University, Boone, NC, US Nagle, Richard J.: U South Carolina, Columbia, SC, US

ER -

TY - JOUR

ID - 702

T1 - Identifying Factors that Relate to Children's Risk-Taking Decisions. [References]

A1 - Morrongiello, Barbara A.

Y1 - 2004///

N1 - Peer Reviewed Journal: 2004-19581-001

English

Journal; Peer Reviewed Journal

KW - PsycInfo

KW - Childhood Play Behavior

KW - Decision Making

KW - Friendship

KW - Risk Factors

KW - Risk Taking

KW - Dangerousness

KW - Dyads

KW - Human Sex Differences

KW - Parental Attitudes

KW - Peer Pressure

KW - Pleasure

RP - NOT IN FILE

SP - 255

EP - 266

JF - Canadian Journal of Behavioural Science/Revue canadienne des sciences du comportement

VL - 36:

IS - 4

N2 - Identified factors related to risk decisions and examined risk-taking in the context of best-friend dyads. Children were individually shown drawings of play situations, with different risk-level paths depicted. They gave ratings of their experience with the activities, provided fun and danger ratings for all paths, indicated the path they would take and why, and answered questions about the choice their best friend would make, and the path each parent would want them to take. Subsequently, a peer-influence session was contrived in which their best friend attempted to persuade them to select another path. Then, children made their final path choices. Greater experience with an activity was associated with greater risk-taking. Perceptions of danger negatively correlated with risk-taking decisions. For boys, fun ratings positively correlated with risk-taking decisions. Girls selected paths consistent with what they believed their parents would favour. Best friends were highly similar in risk-taking. When differences emerged, best friends were successful about half the time in their persuasion efforts. Rate of success positively correlated with friendship quality. (PsycINFO Database Record (c) 2012 APA, all rights reserved) (journal abstract)

SN - 0008-400X

AD - Morrongiello, Barbara A.: University of Guelph, Guelph, ON, Canada Dawber, Tess: University of Guelph, Guelph, ON, Canada

ER -

TY - JOUR

ID - 705

T1 - Chronicity of Maternal Depressive Symptoms, Maternal Sensitivity, and Child Functioning at 36 Months

Y1 - 2005///

N1 - Book: 2005-07172-010

English

Book; Edited Book

KW - PsycInfo

KW - Ability Level

KW - Major Depression

KW - Mother Child Relations

KW - Parental Characteristics

KW - Risk Factors

RP - NOT IN FILE

SP - 151

EP - 162

JF - The NICHD Early Child Care Research Network

VL - :

IS - 2005

N2 - (from the chapter) For this report we examine the link between maternal depression and mother-child interaction and their relations with children's functioning at 36 months. Specifically, we test a model that includes the chronicity of maternal depressive symptoms assessed from the birth of the study child to 36 months, and common co-occurring risk/protective factors such as household income, education, partner presence, and social support. We hypothesize that mothers who report more chronic symptoms of depression across this 3-year period will be less sensitive and responsive to their infants during play, and that the effects of the chronicity of depressive symptoms on mother-child interaction will be moderated by other risk/protective factors. Thus, women with chronic depressive symptoms who also have substantial resources and few psychosocial risks will be more sensitive with their babies than women who report chronic symptoms but also have few resources and little support from others. We also test the hypothesis that children whose mothers report chronic symptoms of depression will display more negative and less positive mood during play. Finally, our longitudinal data permit us to explore whether sensitive and responsive mother-child interaction changes over the first 36 months of life as a function of the chronicity of symptoms and other risk factors. (PsycINFO Database Record (c) 2012 APA, all rights reserved)

ER -

TY - JOUR

ID - 706

T1 - Home environments of 10-month-old infants selected by the WILSTAAR screen for pre-language difficulties. [References]

A1 - Alston,Enid; St James-Roberts,Ian

Y1 - 2005///

N1 - Peer Reviewed Journal: 2005-04988-002

English

Journal; Peer Reviewed Journal

KW - PsycInfo

KW - Home Environment

KW - Infant Development

KW - Language Disorders

KW - Screening Tests

RP - NOT IN FILE

SP - 123

EP - 136

JF - International Journal of Language & Communication Disorders

VL - 40:

IS - 2

N2 - Background and Aims: The Ward Infant Language Screening Test, Assessment, Acceleration and Remediation (WILSTAAR) comprises a programme for identifying and helping 8-10-month-old infants showing early signs of language and communication difficulty. The study addresses one of the queries raised by

critics of the programme by providing evidence about the backgrounds and home environments of infants who fail the WILSTAAR screening assessment. Methods and Procedures: Thirty 10-month-old infants who failed the screen ('at-risk' infants) and 30 gender- and age-matched infants who passed the screen ('not-at-risk' infants) were visited at home by a trained observer who collected information about the infants' physical and social environment and families' demographic features. Outcomes and Results: Parents of both groups were well educated, in stable relationships, and had no evidence of social or economic disadvantage. Measures of ambient sound level and television exposure did not support the hypothesis that the at-risk infants' environments involved high levels of noise. However, observations of spontaneous behaviour and a standardized Mother-Infant Play Task identified low amounts of social interaction in at-risk cases. During the play task, mothers of at-risk infants spent twice as much time without interacting with their infants. At-risk infants babbled one-third less than not-at-risk infants during 150-min observations of spontaneous behaviour. Conclusions: The findings point to deficiencies in social interaction and communication, involving both infant and parental contributions, as maintaining the infants' difficulties at this age. The core of the WILSTAAR intervention, of encouraging social communication between parents and infants, is not complex and does not need to be confined to at-risk cases. How this is best accomplished in the general community, and whether it should be included in national schemes such as Sure Start in the UK, are important topics for practitioners and policy-makers. (PsycINFO Database Record (c) 2012 APA, all rights reserved) (journal abstract)

SN - 1368-2822

AD - Alston, Enid: Thomas Coram Research Unit, Institute of Education, University of London, London, United Kingdom St James-Roberts, Ian: Thomas Coram Research Unit, Institute of Education, University of London, London, United Kingdom

ER -

TY - JOUR

ID - 709

T1 - The Use of Play and Narrative Story Stems in Assessing the Mental Health Needs of Foster Children.

[References]

A1 - Hudd,Sheila

Y1 - 2005///

N1 - Book: 2005-07318-006

English

Book; Edited Book

KW - PsycInfo

KW - Foster Children

KW - Narratives

KW - Play Therapy

KW - Psychological Needs

KW - Psychotherapeutic Techniques

KW - Attachment Behavior

KW - Measurement

KW - Mental Health

KW - Storytelling

KW - Interpersonal Relationships

RP - NOT IN FILE

SP - 113

EP - 132

JF - Schaefer, Charles [Ed]; McCormick, Judy [Ed]; Ohnogi, Akiko [Ed]

VL - :

IS - 2005

N2 - (from the chapter) Attachment theory is a theory of personality development in close relationships and helps us understand why children who have suffered adverse relationships in their early years go on to find relationships difficult in the future. It is no surprise when parents of foster children consider some to be resistant to all efforts and attempts at closeness in any relationships and/or experience their behavior as extremely difficult to manage when they demonstrate a desperate need to manipulate and control their environments. While the use of narrative and story stems is not the only tool used in assessment, story stems are a useful tool as part of assessment and during any brief intervention which aims to gain clues to a child's functioning and

difficulties which will provide indications as to what type of care the child may need, and what type of support the foster parent may need. Once assessment has been completed, if the child's support systems are deemed to be secure, then play therapy can be offered. Play therapy goes on to continue to use story formats, actively help the child develop more adaptive coping strategies, challenge cognitive distortions, and rely less on negative behavior to communicate distress. This chapter in particular sets out to describe how play therapy techniques were used to assess and assist with understanding the difficulties of three foster children who were experiencing problems with their current placement, in school and relationships generally, to the extent that the placement was at severe risk of breakdown. (PsycINFO Database Record (c) 2012 APA, all rights reserved)

AD - Hudd, Sheila: William Harvey Child, Adolescent, and Family Clinic, Putney, England

ER -

TY - JOUR

ID - 710

T1 - The Developmental Psychopathology of Personality Disorders. [References]

A1 - Johnson, Jeffrey G.

Y1 - 2005///

N1 - Book: 2006-04904-015

English

Book; Edited Book

KW - PsycInfo

KW - Developmental Psychology

KW - Personality Disorders

KW - Psychopathology

KW - Susceptibility (Disorders)

RP - NOT IN FILE

SP - 417

EP - 464

JF - Hankin, Benjamin L [Ed]; Abela, John R

VL - Z [Ed]. :

IS - 2005

N2 - (from the chapter) A substantial body of research evidence has indicated that individuals with personality disorders (PDs) are more likely than other individuals to report a history of childhood adversities. Retrospective studies have also provided considerable evidence suggesting that specific combinations of childhood adversities may be differentially associated with risk for the development of specific types of PDs. Although strong inferences regarding causality are not possible based on retrospective data, prospective longitudinal studies have provided additional evidence supporting the hypothesis that specific combinations of childhood adversities are differentially associated with risk for specific PDs. These results dovetail with an accumulating body of evidence from genetic and neurobiological studies supporting the overall hypothesis that childhood abuse contributes to elevated risk for the development of PDs. However, many questions regarding the association between the childhood adversities and risk for PDs remain unanswered. Although there have been noteworthy advances in recent years, scientific understanding of the role that childhood adversities may play in the development of PDs remains somewhat limited. The evidence that is currently available suggests that childhood adversities may play an important role in the development of PDs and that certain combinations of childhood adversities may be differentially associated with risk for specific types of PDs. Increasingly, it will be important for future studies to investigate how childhood adversities may interact with genetic, prenatal, and other vulnerability factors to promote the development of PD symptoms. In addition to investigating the interaction of genetic and environmental factors, it will be important to investigate the three-way interaction of genetic, prenatal, and environmental factors. Such studies hold the promise of improving our understanding of the etiology of PDs and promoting advances in the prevention and treatment of these chronic and debilitating disorders. (PsycINFO Database Record (c) 2012 APA, all rights reserved)

AD - Johnson, Jeffrey G.: Columbia U, Coll of Physicians & Surgeons, Dept of Psychiatry, New York, NY, US

McGeoch, Pamela G.: New School U, NY, US Caskey, Vanessa P.: Long Island U, Brooklyn, NY, US

Abhary, Sotoodeh G.: Flinders Medical Ctr, Adelaide, SA, Australia Sneed, Joel R.: Columbia U, New York, NY, US

Bornstein, Robert F.: Gettysburg Coll, Gettysburg, PA, US

ER -

TY - JOUR

ID - 711

T1 - Does lipreading help word reading: An investigation of the relationship between visible speech and early reading achievement

A1 - Hiramatsu,Sandra

Y1 - 2005///

N1 - Dissertation Abstract: 2005-99023-017

English

Dissertation Abstract

KW - PsycInfo

KW - Childhood Development

KW - Lipreading

KW - Reading Ability

KW - Reading Achievement

KW - Speech Perception

KW - Oral Communication

RP - NOT IN FILE

SP - 2153

JF - Dissertation Abstracts International Section A: Humanities and Social Sciences

VL - 66:

IS - 6-A

N2 - Numerous studies have acknowledged the importance of speech perception, phonological representation, phonological memory, phonological recall, and phonological awareness to reading. However, the role that visual articulatory cues (VAC) may play in these processes has rarely been investigated even though VAC are an integral aspect of speech perception. Watching a speaker's mouth and tongue enhances speech perception, particularly when hearing is challenged by noise, unfamiliar words, accents, or abstract listening situations, such as early classroom reading instruction. Word decoding requires accurate perception of phonemes and systematic mapping of phonemes to written representations. The more accurate these perceptions are, the greater the probability that what is "sounded out" will match recognizable spoken words. The purpose of this study was to explore the role that visible articulatory cues might play in the early reading achievement of normally functioning children. Specifically, this study investigated whether the availability of visible articulatory cues improved letter-sound perception and whether the ability to lipread had a relationship with children's identification of letter sounds, phonological awareness, pseudoword reading, and real word reading. Seventy-five kindergarten, first, and second grade students from at-risk socio-economic backgrounds responded to tests of the preceding attributes. Repeated measures ANOVA found that the presence of visible articulatory cues significantly contributed to subjects' accuracy in repeating letter sounds heard in the presence of noise. Multiple regression analyses revealed that lipreading helped to uniquely explain the variance in phonological awareness beyond the effects of print letter knowledge. Further regression analyses indicated that phonological awareness mediated the relationship between lipreading and pseudoword reading and real word reading. Study results supported a critical role for visible articulatory cues in the accuracy of letter sound perception and phonological awareness in an at-risk sample. Further investigation into the role of visible articulatory cues in early reading achievement and instruction is warranted. Findings also suggested that cognitive models of reading might be enhanced by the addition of visible articulatory cues. (PsycINFO Database Record (c) 2012 APA, all rights reserved)

SN - 0419-4209

AD - Hiramatsu, Sandra: U Washington, US

ER -

TY - JOUR

ID - 712

T1 - An examination of parent-child play as influenced in the development of aggression in preschool boys

A1 - Davenport,Becky Renae

Y1 - 2005///

N1 - Dissertation Abstract: 2005-99011-080

English

Dissertation Abstract



KW - PsycInfo

KW - Aggressive Behavior

KW - Behavior Problems

KW - Home Environment

KW - Preschool Students

KW - Parent Child Relations

KW - Recreation

RP - NOT IN FILE

SP - 4739

JF - Dissertation Abstracts International Section A: Humanities and Social Sciences

VL - 65:

IS - 12-A

N2 - Children displaying high levels of aggression have repeatedly been shown to be at significant risk for continued behavior problems and other social and emotional challenges throughout their lifetimes. The current project includes two papers that examine factors contributing to the development and maintenance of aggression in preschool-aged children, especially focusing on preschool boys. The first paper reviews theoretical and empirical literature addressing the development of aggressive behavior problems. Specific attention is given to influences within the child's family environment, including positive parental involvement, harsh discipline practices, and play activities of the child both individually and jointly with his or her parent or caregiver. The second paper presents results of an empirical investigation of the relationship between parent behaviors during parent-child interactions and teacher-reported problem behaviors in preschool boys. A stratified sample of 34 three- to five-year old boys and their primary caregivers were observed in their homes engaged in unstructured free-play and a problem-solving task. Behaviors of primary caregivers in each interaction were examined in relationship to teachers' ratings of the boys' externalizing behaviors in a child care setting. Parenting characteristics in the play, but not problem-solving, interaction were found to have a statistically significant relationship with boys' externalizing scores. Positive characteristics of the caregiver in play, such as warmth and sensitivity to the child, accounted for a statistically significant amount of variance in boys' teacher-reported externalizing scores beyond that accounted for by the negative characteristics, such as intrusiveness and hostility. The findings are discussed in relation to previous literature that has addressed both the development of behavior problems in young children and the role of parent-child play interactions in child development. Clinical implications for this population are also discussed. (PsycINFO Database Record (c) 2012 APA, all rights reserved)

SN - 0419-4209

AD - Davenport, Becky Renae: Iowa State U., US

ER -

TY - JOUR

ID - 714

T1 - Emotion regulation and adherence in children with diabetes

A1 - Dasari, Meena

Y1 - 2005///

N1 - Dissertation Abstract: 2005-99002-033

English

Dissertation Abstract

KW - PsycInfo

KW - Behavior

KW - Diabetes

KW - Emotional Control

KW - Emotional Responses

KW - Treatment Compliance

RP - NOT IN FILE

SP - 3702

JF - Dissertation Abstracts International: Section B: The Sciences and Engineering

VL - 65:

IS - 7-B

N2 - Emotion regulation refers to the ability to manage negative emotions in order to adaptively engage in one's environment. In school-age and clinical populations, better emotion regulation relates to important behavioral outcomes such as lower aggression levels and decreased risk of developing clinical disorders. However, little is known about the relationship of emotion regulation to behavioral functioning in pediatric populations. In particular, emotion regulation in children with diabetes may be a link to understanding adherence, an important behavioral outcome in pediatric populations. The primary purpose of the present study was to develop and to test a theoretical model examining the relationship of emotion regulation to adherence in school-age children with diabetes. A secondary purpose was to adapt existing measures to assess emotion regulation as a multi-dimensional construct. Participants included 83 children ages 6 to 12, their parents, and their nurse providers recruited from a diabetes clinic in a pediatric hospital. Multiple methods were used to assess emotion regulation (i.e., behavioral observations and ratings scales) and adherence (i.e., rating scales and electronic monitor readings). Each child was administered both a disappointment task and a play task. Parents completed rating scales on their child's emotion regulation and their treatment adherence, while nurses rated each child's adherence and collected electronic monitor readings. Using simultaneous and stepwise multiple regressions to analyze the proposed model, parent report of children's emotion regulation emerged as the best predictor of treatment adherence, independent of age and disease duration. Children who were perceived to have better emotion regulation ability were also more compliant with their diabetes regimen. Both disappointment task and play task variables did not consistently relate to adherence measures. Overall, the multiple measures of emotion regulation were reliable and factor analyses revealed several dimensions that underlie the construct of emotion regulation. Results of this study have clinical implications for children with diabetes as well as implications for future research examining emotion regulation in school-age pediatric populations. (PsycINFO Database Record (c) 2012 APA, all rights reserved)

SN - 0419-4217

AD - Dasari, Meena: Case Western Reserve U., US

ER -

TY - JOUR

ID - 717

T1 - Risk factors for alcohol and other drug disorders: A review. [References]

A1 - Marsh,A.

Y1 - 2005///

N1 - Peer Reviewed Journal: 2005-08137-003

English

Journal; Peer Reviewed Journal

KW - PsycInfo

KW - Alcohol Abuse

KW - Drug Abuse

KW - Mental Disorders

KW - Risk Factors

KW - Comorbidity

RP - NOT IN FILE

SP - 73

EP - 80

JF - Australian Psychologist

VL - 40:

IS - 2

N2 - The role of comorbid psychological disorders in alcohol and other drug disorders is considered in the context of other individual, family, peer and broader environmental risk factors. Although peer and environmental factors play an important role in all drug use, family factors, psychological difficulties and emotional distress play a crucial role in the transition from controlled to excessive drug use. Essentially, dysfunctional parent-child relationships and severe family disruption contribute to emotional distress and to a sense of alienation from conventional sources of reward (family, school, work, and intimate relationships). For people who are distressed or alienated, heavy drug involvement can be a way to manage negative affect, bond with others, and/or experience alternative source of reward. Even people who use drugs to manage negative affect, however, are also likely to use them in some circumstances such as to have fun and be social. Excessive

substance use also results in emotional distress, and it can be difficult to distinguish cause and consequence. (PsycINFO Database Record (c) 2012 APA, all rights reserved) (journal abstract)

SN - 0005-0067

AD - Marsh, A.: School of Psychology, Curtin University, Perth, WAU, Australia Dale, A.: School of Psychology, Curtin University, Perth, WAU, Australia

ER -

TY - JOUR

ID - 718

T1 - The Play's the Thing: A Clinical-Developmental Perspective on Video Games. [References]

A1 - Gelfond,Holly S; Saloni-Pasternak,Dorothy

Y1 - 2005///

N1 - Peer Reviewed Journal: 2005-07326-009

English

Journal; Peer Reviewed Journal

KW - PsycInfo

KW - Cognitive Development

KW - Computer Games

KW - Emotional Development

RP - NOT IN FILE

SP - 491

EP - 508

JF - Child and Adolescent Psychiatric Clinics of North America

VL - 14:

IS - 3

N2 - In this article, computer and video games are discussed as electronic play. Major perspectives on play and salient developmental issues are presented, along with similarities and differences between electronic play and other types of play. The authors consider possible benefits and risks associated with this type of play, with particular attention paid to cognitive and socioemotional development. Recommendations for clinicians in their work with children, adolescents, and parents are discussed, as are future directions for research. (PsycINFO Database Record (c) 2012 APA, all rights reserved) (journal abstract)

SN - 1056-4993

AD - Gelfond, Holly S.: Harvard Medical School, Center for Mental Health and Media, Waltham, MA, US Saloni-Pasternak, Dorothy E.: Department of Psychiatry, Massachusetts General Hospital, Boston, MA, US

ER -

TY - JOUR

ID - 719

T1 - Gaze-Shift Patterns of Young Children with Developmental Disabilities who are at Risk for being Nonspeaking. [References]

A1 - Arens,Kelli

Y1 - 2005///

N1 - Peer Reviewed Journal: 2005-06044-006

English

Journal; Peer Reviewed Journal

KW - PsycInfo

KW - Childhood Development

KW - Communication Skills

KW - Developmental Disabilities

KW - Eye Fixation

KW - Visual Attention

KW - At Risk Populations

RP - NOT IN FILE

SP - 158

EP - 170

JF - Education and Training in Developmental Disabilities

VL - 40:

IS - 2

N2 - Children with developmental disabilities often have difficulty with joint attention that can affect more advanced communication skills. This study evaluated the complexity of child engagement behaviors demonstrated by twenty-five pre-intentional children (age 9 to 25 months), who had developmental disabilities and were at risk for being nonspeaking. During free play with their parents, these children demonstrated infrequent and simple gaze shifts and focused more on individual objects or people than shared attention with parents during play. These children seldom engaged in coordinated attention behaviors such as shifting gaze back and forth between people and objects during their play with parents. Type and frequency of engagement behaviors are discussed relative to understanding the unique challenges for children with developmental disabilities that include motor and visual impairments. (PsycINFO Database Record (c) 2012 APA, all rights reserved) (journal abstract)

SN - 1547-0350

AD - Arens, Kelli: University of Nebraska, Lincoln, NE, US Cress, Cynthia J.: University of Nebraska, Lincoln, NE, US Marvin, Christine A.: University of Nebraska, Lincoln, NE, US

ER -

TY - JOUR

ID - 721

T1 - Role of Childhood Experiences in the Development of Maladaptive and Adaptive Personality Traits.

[References]

A1 - Johnson, Jeffrey G.

Y1 - 2005///

N1 - Book: 2005-05013-013

English

Book; Edited Book

KW - PsycInfo

KW - Early Experience

KW - Personality Development

KW - Personality Disorders

KW - Personality Traits

RP - NOT IN FILE

SP - 209

EP - 221

JF - Oldham, John M [Ed]; Skodol, Andrew E [Ed]; Bender, Donna S [Ed]

VL - :

IS - 2005

N2 - (from the chapter) During the past century, clinical experience and research have provided considerable support for the hypothesis that interpersonal experiences during childhood and adolescence play an important role in personality development (e.g., Erikson 1963). Childhood adversities such as maladaptive parenting and childhood abuse and neglect may be likely to have an adverse impact on personality development because they interfere with or alter the trajectory of normative socialization processes during childhood and adolescence (Cohen 1999; Johnson et al. 2001a). Positive experiences during childhood and adolescence, such as parental warmth and support, may be likely to promote the development of adaptive traits such as trust, altruism, and optimism, due to social learning processes and development of a secure attachment style during childhood (e.g., Erikson 1963; Sroufe et al. 1999). This chapter presents a summary of research findings that are currently available regarding the role that childhood experiences may play in the development of maladaptive and adaptive personality traits. We begin by summarizing the evidence that is currently available from retrospective and prospective studies regarding the hypothesized association between childhood adversities and personality disorders. The association of childhood abuse and neglect with risk for the development of personality disorders is examined in particular depth because this association is of considerable interest to clinicians and because comparatively little information is available regarding other adversities that may contribute to the development of maladaptive traits. The chapter concludes with an examination of the available evidence regarding the association of positive childhood experiences with the development of adaptive traits. (PsycINFO Database Record (c) 2012 APA, all rights reserved)

AD - Johnson, Jeffrey G.: Columbia U, Coll of Physicians & Surgeons, Dept of Psychiatry, New York, NY, US  
Bromley, Elizabeth: West Los Angeles VA Mental Illness Research, Education, & Clinical Ctr (MIRECC), CA,  
US McGeoch, Pamela G.: The New School U, Dept of Psychology, New York, NY, US  
ER -

TY - JOUR

ID - 722

T1 - The Primary Mental Health Project: A Play Intervention for School-Age Children. [References]

A1 - Johnson,Deborah B.

Y1 - 2005///

N1 - Book: 2005-02330-002

English

Book; Edited Book

KW - PsycInfo

KW - Adjustment Disorders

KW - Play Therapy

KW - Primary Mental Health Prevention

KW - School Adjustment

KW - School Based Intervention

RP - NOT IN FILE

SP - 13

EP - 30

JF - Reddy, Linda A [Ed]; Files-Hall, Tara M [Ed]; Schaefer, Charles E [Ed]

VL - :

IS - 2005

N2 - (from the book) In this chapter, the authors discuss a well-researched school-based preventative play intervention program, the Primary Mental Health Project (PMHP). PMHP, established in 1957, targets primary school-age children at risk for adjustment difficulties and has been implemented in over 2,000 schools worldwide. Under supervision, paraprofessionals are trained in child-centered play therapy principles and skills so they can conduct individual play sessions. Outcome evaluations of PMHP reveal that the children demonstrate significant improvements in adjustment in both the short and the long term. (PsycINFO Database Record (c) 2012 APA, all rights reserved)

AD - Johnson, Deborah B.: Children's Institute, Inc., US Pedro-Carroll, JoAnne L.: Children's Institute, Inc.,  
US Demanchick, Stephen P.: University of Rochester, Rochester, NY, US

ER -

TY - JOUR

ID - 723

T1 - Responsiveness and attention during picture-book reading in 18-month-old to 24-month-old toddlers at risk. [References]

A1 - Fletcher,Kathryn L.

Y1 - 2005///

N1 - Peer Reviewed Journal: 2004-22506-005

English

Journal; Peer Reviewed Journal

KW - PsycInfo

KW - At Risk Populations

KW - Attention

KW - Childhood Development

KW - Language Development

KW - Reading Skills

KW - Literacy

RP - NOT IN FILE

SP - 63

EP - 81

JF - Early Child Development and Care

VL - 175:

IS - 1

N2 - The purpose of this research was to examine the spontaneous responsiveness and attention during picture-book reading in 18-month-old to 24-month-old children from at-risk backgrounds. Twenty-five, 18-month-old children in an early intervention program were randomly assigned to a read condition or play condition for six months. At each seventh session, all children, regardless of condition, were videotaped during reading. Videotapes were scored for children's spontaneous responses such as pointing and labeling as well as mean duration of joint attention. Primary caregivers completed language measures for children at 18 and 24 months of age. Overall, there was large variability in the level of children's spontaneous responses and attention during reading. Responsiveness increased from observation 3 to observation 4, whereas joint attention increased from observation 1 to observation 2. There were no differences in responsiveness and joint attention measures for the children in the read and play conditions. Measures of joint attention during reading from 18 to 24 months of age were related to language measures at 24 months. Implications for this research include a closer examination of individual differences in young children's participation in picture-book reading. (PsycINFO Database Record (c) 2012 APA, all rights reserved) (journal abstract)

SN - 0300-4430

AD - Fletcher, Kathryn L.: Ball State University, Muncie, IN, US Perez, Andreina: Research Triangle Institute, Research Triangle Park, NC, US Hooper, Corrie: University of Miami, Coral Gables, FL, US Claussen, Angelika H.: University of Miami, Coral Gables, FL, US

ER -

TY - JOUR

ID - 724

T1 - Rejection sensitivity and girls' aggression. [References]

A1 - Downey, Geraldine; Irwin, Lauren; Ramsay, Melissa; Ayduk, Ozlem

Y1 - 2004///

N1 - Book: 2005-15189-002

English

Book; Edited Book

KW - PsycInfo

KW - Aggressive Behavior

KW - Human Females

KW - Psychosocial Development

KW - Self Regulation

KW - Social Acceptance

KW - Adolescent Psychology

KW - Hostility

KW - Interpersonal Interaction

KW - Models

KW - Retaliation

KW - Self Concept

RP - NOT IN FILE

SP - 7

EP - 25

JF - Moretti, Marlene M [Ed]; Odgers, Candice L [Ed]; Jackson, Margaret A [Ed]

VL - :

IS - 2004

N2 - (from the chapter) Given the central importance of close relationships in women's lives (Gilligan, 1982; see Cross & Madson, 1997, for review), issues of acceptance and rejection appear to play a particularly salient role in women's interpersonal interactions (Purdie & Downey, 2000). It has been posited that maintaining harmonious intimate relationships is integral to women's self-concept (Baumeister & Sommer, 1997; Cross & Madson, 1997). Yet, some women react aggressively towards important others when the threat of rejection is perceived. Such reactions threaten the security and stability of the relationship, and, in turn, the woman's self-concept. What cognitive-affective processes might account for this distinctive pattern of female hostility? Our efforts to address this question have focused on the role that Rejection Sensitivity (RS) may play in helping explain why some women show high levels of relational, and even physical, aggression against the very people

they care about most. Our model also takes into account a resilience-generating process (i.e., self-regulation) that may play a potentially crucial role in breaking the link between RS and maladaptive behavior. Self-regulatory competency appears to protect RS women from the maladaptive consequences of the RS disposition. However, women who show a combination of both high RS and poor self-regulatory abilities appear to be particularly vulnerable to aggressive behavior toward significant others, as well as other personal and interpersonal difficulties. Although the mechanisms of the RS model hold true for both male and female populations, we have found that the context and resultant behavior can differ for women and men. In this chapter, our theoretical interpretation of RS and aggression, as well as our findings, refer to women. However, we want to clarify at the outset that most of these results also apply to men, but we have found that the results for men have generally been weaker and less consistent than for women. In this chapter, we first describe the RS model and the evidence that we have in support of the links in the model. We next describe the role of self-regulatory competency in moderating the maladaptive effects of RS. Whereas our focus is primarily on the links between RS and aggression, we also discuss how RS may place women at risk for other forms of harmful behavior. Specifically, we propose that, whereas the perception of the occurrence of rejection may unleash hostile retaliation, the threat of rejection may also prompt behavior that is intended to prevent rejection but instead puts the self or others in harm's way. For example, women may put themselves at risk for personal harm, as when they tolerate abusive behavior or engage in unprotected sex in order to maintain a relationship (Purdie & Downey, 2000). Furthermore, women may engage in antisocial behavior to maintain a relationship, such as concealing weapons or drugs for a romantic partner (Bedell, 1999). (PsycINFO Database Record (c) 2012 APA, all rights reserved)

AD - Downey, Geraldine: Dept of Psychology, Columbia U, New York, NY, US  
 Irwin, Lauren: Dept of Psychology, Columbia U, New York, NY, US  
 Ramsay, Melissa: Dept of Psychology, Columbia U, New York, NY, US  
 Ayduk, Ozlem: Psychology Dept, U California, Berkeley, CA, US

ER -

TY - JOUR

ID - 725

T1 - Mothers' Child Abuse Potential as a Predictor of Maternal and Child Behaviors During Play-Time Interactions. [References]

A1 - Wilson, Steven R.

Y1 - 2004///

N1 - Peer Reviewed Journal: 2005-02140-002

English

Journal; Peer Reviewed Journal

KW - PsycInfo

KW - Child Abuse

KW - Childhood Play Behavior

KW - Mother Child Communication

KW - Mother Child Relations

RP - NOT IN FILE

SP - 395

EP - 421

JF - Communication Monographs

VL - 71:

IS - 4

N2 - This paper explores the effect of mothers' child abuse potential on maternal and child behaviors during play-time interactions. Forty-two mothers participated in a 10-min play period followed by a clean-up task along with one of their children (range = 3-8 years old), after which they completed Milner's (1994) Child Abuse Potential (CAP) Inventory. Mothers' behaviors were coded using a 21-category scheme, which was collapsed into five behavioral clusters: describing, directing, criticizing, soliciting/affirming, and silent play. Children were rated for levels of involvement (activity) and cooperation. Mothers' child abuse potential scores were inversely associated with their own rate of soliciting/affirming behaviors during the play period. Children of higher-risk mothers displayed higher levels of involvement combined with lower levels of cooperation compared children of lower-risk mothers. Implications for understanding and responding to child physical abuse are discussed. (PsycINFO Database Record (c) 2012 APA, all rights reserved) (journal abstract)

SN - 0363-7751

AD - Wilson, Steven R.: Purdue University, West Lafayette, IN, US Morgan, Wendy M.: Purdue University, West Lafayette, IN, US Hayes, Javette: California State University, Fullerton, CA, US Bylund, Carma: University of Iowa, Iowa City, IA, US Herman, Andrew: State University of New York, Geneseo, NY, US  
ER -

TY - JOUR

ID - 727

T1 - Guest Editorial: On Behalf of Children

A1 - Chenfeld,Mimi Brodsky

Y1 - 2004///

N1 - Peer Reviewed Journal: 2004-21463-001

English

Journal; Peer Reviewed Journal

KW - PsycInfo

KW - Childhood Play Behavior

KW - Creativity

KW - Early Childhood Development

KW - Learning

KW - School Learning

RP - NOT IN FILE

SP - 141

EP - 142

JF - Early Childhood Education Journal

VL - 32:

IS - 3

N2 - On those rare occasions when I'm not running late to my movement sessions at the early childhood program where I've been hanging out for over thirty-three years, I love to poke around and watch kids at the start of their busy days. The lessons from today's early morning snoop-around are old, clear messages. They remind us that when children are given many opportunities to follow their own interests, they are excited! They are empowered! They share! Enthusiasm is contagious. All over this great land of ours, a land in the midst of tumultuous times-a high-pressured, test driven, statistics-centered culture, (education at a crossroads) there are teachers who breathe life into theories and terminology such as "language immersion," "integrated learning," "emergent curriculum"... While so many misguided folks advocate the downplaying of play, these educators value the vital place play holds in the natural and joyful ways children best learn. How lucky for those children whose teachers help keep them WHOLE, guiding, sharing, and celebrating the creative process, honoring their uniqueness, making room in their rooms for free spirited, cooperative, open-minded and open-ended adventures in learning. (PsycINFO Database Record (c) 2012 APA, all rights reserved)

SN - 1082-3301

ER -

TY - JOUR

ID - 728

T1 - Descriptive Analysis of Parent-Child Interactions in Young Children with or at Risk for Developmental Delay. [References]

A1 - Passey,Jennifer

Y1 - 2004///

N1 - Peer Reviewed Journal: 2004-20797-001

English

Journal; Peer Reviewed Journal

KW - PsycInfo

KW - Adaptive Behavior

KW - Behavior Problems

KW - Delayed Development

KW - Parent Child Relations

KW - Reinforcement

KW - At Risk Populations



RP - NOT IN FILE

SP - 233

EP - 246

JF - Behavioral Interventions

VL - 19:

IS - 4

N2 - Children with developmental delay (DD) are at risk for behavior problems, but little is known about natural contingencies of reinforcement that these children experience. The present study used descriptive analysis (antecedent-behavior-consequence observations) to study parent-child interactions of forty-seven, 2-3 year-old children with or at risk for DD. Child adaptive and inappropriate behavior as well as their antecedents and consequences were observed across four conditions (free play, parent-directed play, mealtimes, parental distraction). When parents were engaged in another task (distraction), child appropriate behavior occurred less frequently than in the other conditions, and child inappropriate behavior occurred 63% of the time. A lack of parental attention and no activity were the most frequent antecedents for inappropriate behavior. Potential positive reinforcers appeared as consequences of inappropriate child behavior 77% of the time. These findings have implications for the development and prevention of serious behavior disorders. (PsycINFO Database Record (c) 2012 APA, all rights reserved) (journal abstract)

SN - 1072-0847

AD - Passey, Jennifer: Queen's University, Kingston, ON, Canada Feldman, Maurice: Brock University, St. Catharines, ON, Canada

ER -

TY - JOUR

ID - 729

T1 - Theorizing the Father-Child Relationship: Mechanisms and Developmental Outcomes. [References]

A1 - Paquette, Daniel

Y1 - 2004///

N1 - Peer Reviewed Journal: 2004-18780-001

English

Journal; Peer Reviewed Journal

KW - PsycInfo

KW - Childhood Development

KW - Father Child Communication

KW - Father Child Relations

KW - Mother Child Relations

KW - Parental Role

RP - NOT IN FILE

SP - 193

EP - 219

JF - Human Development

VL - 47:

IS - 4

N2 - The aim of this article is to propose a theorization of the father-child relationship based on our current understanding of attachment, interactions between fathers and their young children, and human-specific adaptations. The comparison of mother-child and father-child interactions suggests that fathers play a particularly important role in the development of children's openness to the world. Men seem to have a tendency to excite, surprise, and momentarily destabilize children; they also tend to encourage children to take risks, while at the same time ensuring the letter's safety and security, thus permitting children to learn to be braver in unfamiliar situations, as well as to stand up for themselves. But this dynamic can only be effective in the context of an emotional bond between father and child; this relationship is termed the father-child activation relationship, in contrast to the mother-child attachment relationship aimed at calming and comforting children in times of stress. The activation relationship is developed primarily through physical play. It is postulated, in particular, that father-child rough-and-tumble play encourages obedience and the development of competition skills in children. (PsycINFO Database Record (c) 2012 APA, all rights reserved) (journal abstract)

SN - 0018-716X

AD - Paquette, Daniel: Centre jeunesse de Montreal, University of Montreal, Montreal, PQ, Canada

ER -

TY - JOUR

ID - 731

T1 - Childhood obesity and consumption of fizzy drinks: Play outside to reduce childhood obesity.

[References]

A1 - Sutton,Alan

Y1 - 2004///

N1 - Peer Reviewed Journal: 2004-16071-015

English

Journal; Peer Reviewed Journal

KW - PsycInfo

KW - Activity Level

KW - Exercise

KW - Obesity

KW - Public Health

KW - Risk Management

KW - Childhood Play Behavior

KW - Health Behavior

KW - Parent Child Relations

RP - NOT IN FILE

SP - 54

JF - BMJ: British Medical Journal

VL - 329:

IS - 7456

N2 - This letter to the editor comments on the 2004 article "Preventing childhood obesity by reducing consumption of carbonated drinks: cluster randomised controlled trial," by J. James et al. The rise in childhood obesity is paralleled by the rise in parental fears of the risks to children of being unaccompanied outdoors. I find it strange that the simple solution, to let children play outside more, is dismissed as impossible in our modern society. Stranger-danger is largely a myth promoted by the mass media, yet mere are few voices raised against it. Parents' refusal to allow free play for their children is now becoming embedded in a system of parental peer pressure whereby parents are afraid to allow children out for fear of being labeled uncaring (or worse) by their peers. (PsycINFO Database Record (c) 2012 APA, all rights reserved)

SN - 0959-8138

AD - Sutton, Alan: Westminster Play Association, London, United Kingdom

ER -

TY - JOUR

ID - 732

T1 - Social Play of Young Children At-Risk of Learning Difficulties: A situated performance? [References]

A1 - Van der Aalsvoort,Geerdina M.

Y1 - 2004///

N1 - Peer Reviewed Journal: 2004-15659-003

English

Journal; Peer Reviewed Journal

KW - PsycInfo

KW - At Risk Populations

KW - Childhood Play Behavior

KW - Learning Disabilities

RP - NOT IN FILE

SP - 151

EP - 169

JF - International Journal of Disability, Development and Education

VL - 51:

IS - 2

N2 - The question asked by this study was whether information on play behaviour of young children at-risk of learning difficulties could act as a diagnostic means of investigating emerging learning difficulties. A sociocultural perspective was taken to examine the role of interaction during the play of students in a regular primary school and in a special primary school using a multimethod approach. Groups of students from both schools were studied during eight 30-minute sessions over a period of 3 weeks. The groups were matched with respect to age and language development and then divided into 2 further groups of 3 students each per school. Each group was invited to build a zoo using toy animals and wooden blocks. The 32 sessions were videotaped, transcribed, and analysed microgenetically with measures involving the types of collaboration during play and metaplay. The results showed that the number of episodes and the most elaborate type of collaboration occurred more often in the regular primary school than in the special school, whereas the frequency of metaplay did not differ significantly between the schools. Fragments of discourse obtained during the sessions are presented and discussed. It is concluded from the findings that social play may emerge as a situated performance. (PsycINFO Database Record (c) 2012 APA, all rights reserved)

SN - 1034-912X

AD - Van der Aalsvoort, Geerdina M.: Leiden University, Leiden, Netherlands Van Tol, Annemarie M.: Leiden University, Leiden, Netherlands Karemaker, Arjette M.: Leiden University, Leiden, Netherlands

ER -

TY - JOUR

ID - 734

T1 - The development of symbolic play and language in toddlers with cleft palate. [References]

A1 - Snyder,Lynn E; Scherer,Nancy

Y1 - 2004///

N1 - Peer Reviewed Journal: 2004-13759-007

English

Journal; Peer Reviewed Journal

KW - PsycInfo

KW - Childhood Play Behavior

KW - Childhood Play Development

KW - Cleft Palate

KW - Gestures

KW - Language Development

RP - NOT IN FILE

SP - 66

EP - 80

JF - American Journal of Speech-Language Pathology

VL - 13:

IS - 1

N2 - This study compared the longitudinal performance of two groups of toddlers with palatal clefts and an age-matched group of children without palatal clefts on measures of elicited symbolic play at 18, 24, and 30 months. The results indicated that the group with isolated cleft palate differed significantly from both the cleft lip and palate group and the noncleft group on all but 1 play measure. Correlational analyses for each group indicated significant positive correlations between a number of the play variables at 18 months and productive vocabulary and MLU at 24 and 30 months of age. The findings suggest that assessment of early play gestures may assist clinicians in identifying children with clefts who are at risk for later language impairment.

(PsycINFO Database Record (c) 2012 APA, all rights reserved) (journal abstract)

SN - 1058-0360

AD - Snyder, Lynn E.: University of Colorado, Boulder, CO, US Scherer, Nancy: East Tennessee State University, Johnson City, TN, US

ER -

TY - JOUR

ID - 735

T1 - Maternal support for play and language across early childhood. [References]

A1 - Hebert,Heather; Swank,Paul; Smith,Karen; Landry,Susan

Y1 - 2004///

N1 - Peer Reviewed Journal: 2004-10281-006

English

Journal; Peer Reviewed Journal

KW - PsycInfo

KW - Childhood Play Behavior

KW - Childrearing Practices

KW - Language Development

KW - Mother Child Relations

KW - Psychosocial Development

KW - At Risk Populations

KW - Parental Characteristics

KW - Premature Birth

RP - NOT IN FILE

SP - 93

EP - 113

JF - Early Education and Development

VL - 15:

IS - 1

N2 - Patterns of development in language and play for full term and preterm children from 6 to 54 months and the effects of maternal parenting strategies (i.e., maintaining attentional focus, use of directiveness) were examined. Significant risk differences in the growth of both language and play were found. The high risk children were more likely to show delays in both these skills. Maintaining had a positive influence on children's skills, while directiveness had a largely negative influence, especially at older ages. The relation between growth in play and language was stronger for the high risk, preterm, when compared to the low risk and full term, children, but only during the infancy and toddler period. Given that play and language development is more likely to be delayed for preterm, high-risk children and the relation between the development of these skills is stronger for high risk preterm children, particularly early, it would be important to provide the parents and educators with information about play and language development. For example, communicating the need to be consistent in using some interactive behaviors (e.g., maintaining) as children develop while modifying other behaviors (e.g., directiveness) would be essential. (PsycINFO Database Record (c) 2012 APA, all rights reserved) (journal abstract)

SN - 1040-9289

AD - Hebert, Heather: University of Texas Health Science Center, Houston, TX, US Swank, Paul: University of Texas Health Science Center, Houston, TX, US Smith, Karen: University of Texas Medical Branch, Galveston, TX, US Landry, Susan: University of Texas Health Science Center, Houston, TX, US

ER -

TY - JOUR

ID - 736

T1 - Sandplay, Art, and Play Therapy to Promote Anxiety Reduction. [References]

A1 - Carey,Lois

Y1 - 2004///

N1 - Book: 2004-00199-010

English

Book; Edited Book

KW - PsycInfo

KW - Anxiety Disorders

KW - Art Therapy

KW - Emotional Trauma

KW - Play Therapy

KW - Family Therapy

KW - Migraine Headache

KW - Separation Anxiety

KW - Terrorism

RP - NOT IN FILE

SP - 216

EP - 233

JF - Webb, Nancy Boyd [Ed]

VL - :

IS - 2004

N2 - (from the chapter) This chapter discusses creative techniques that are helpful in resolving disturbing responses to many situations of trauma. The case presented in this chapter is that of an anxious child whose symptom of migraine headaches was exacerbated by the events of 9/11. Alexander (age 10) was at risk because of several factors: (1) his history of migraine headaches; (2) his father's role in the World Trade Center search and rescue operations; (3) the exacerbation of a separation anxiety disorder. Art therapy, sandplay therapy, and family therapy were all employed in this child's treatment. Improvement was noted after the first few months, signified by the lessened frequency of his migraines and confirmed by what was revealed in the sand pictures. Alexander's resistance to attending therapy was ameliorated by decreasing the frequency of the sessions and by his recognition that his symptoms, though not fully resolved, were abating. Several pictorial examples of Alexander's journey toward healing are included in this chapter. These demonstrate how, through the use of these creative milieus, he did indeed accomplish some resolution of his fears. In so doing, he was able to reduce some of his symptoms. Alexander agreed to continue therapy with the objective of addressing his remaining anxieties. (PsycINFO Database Record (c) 2012 APA, all rights reserved)

AD - Carey, Lois: Private Practice, Upper Grandview, NY, US

ER -

TY - JOUR

ID - 737

T1 - Neighborhood playgrounds, fast food restaurants, and crime: Relationships to overweight in low-income preschool children. [References]

A1 - Burdette, Hillary L.

Y1 - 2004///

N1 - Peer Reviewed Journal: 2003-11128-008

English

Journal; Peer Reviewed Journal

KW - PsycInfo

KW - Lower Income Level

KW - Neighborhoods

KW - Obesity

KW - Overweight

KW - Crime

KW - Playgrounds

KW - Safety

RP - NOT IN FILE

SP - 57

EP - 63

JF - Preventive Medicine: An International Journal Devoted to Practice and Theory

VL - 38:

IS - 1

N2 - We examined the relationship between overweight in preschool children and three environmental factors--the proximity of the children's residences to playgrounds and to fast food restaurants and the safety of the children's neighborhoods. We hypothesized that children who lived farther from playgrounds, closer to fast food restaurants, and in unsafe neighborhoods were more likely to be overweight. This was a cross-sectional study of 7,020 low-income children, 36 through 59 months of age living in Cincinnati, OH. Overweight was defined as a measured body mass index  $\geq$ 95th percentile. Neighborhood safety was defined by the number of police-reported crimes per 1,000 residents per year in each of 46 city neighborhoods. Overall, 9.2% of the children were overweight, 76% black, and 23% white. The mean (+/-SD) distances from a child's home to the nearest playground and fast food restaurant were 0.31 miles, respectively. There was no association between child overweight and proximity to playgrounds, proximity to fast food restaurants, or level of neighborhood crime. Within a population of urban low-income preschoolers, overweight was not associated with proximity to playgrounds and fast food restaurants or with the level of neighborhood crime. (PsycINFO Database Record (c) 2012 APA, all rights reserved)

SN - 0091-7435

AD - Burdette, Hillary L.: Division of General and Community Pediatrics, Cincinnati Children's Hospital Medical Center, Cincinnati, OH, US Whitaker, Robert C.: Division of General and Community Pediatrics, Cincinnati Children's Hospital Medical Center, Cincinnati, OH, US

ER -

TY - JOUR

ID - 738

T1 - The Body Goes to the City project: Research on safe routes to school and playgrounds in Ferrara.

[References]

A1 - Balzani,Marcello

Y1 - 2003///

N1 - Book: 2004-00314-023

English

Book; Edited Book

KW - PsycInfo

KW - Playgrounds

KW - Safety

KW - Schools

KW - Urban Environments

KW - Urban Planning

RP - NOT IN FILE

SP - 313

EP - 323

JF - Garcia Mira, Ricardo [Ed]; Sabucedo Cameselle, Jose M [Ed]; Romay Martinez, Jose [Ed]

VL - :

IS - 2003

N2 - (from the chapter) The research activity presented here is the fruit of a co-operation between an association (UISP Ferrara, The Body Goes to the City project), a faculty (the Faculty of Architecture of the University of Ferrara) and local authorities (La Citta bambina [Children's City] project). The common objective--to regain the possibility of children gaining autonomy with regards their personal mobility--has stimulated common strategies of intervention. These projects started from sociological research concerning liveability as well as safety, and have involved both school children and the whole neighbourhood, and were further developed in workshops in schools. Finally, the data collected in the studies and the workshops was adopted by town planners for the elaboration of the final project. The particularities of this research action are the common long-term intervention methodology, which--also thanks to the common training of operators with different professional backgrounds--allows the conservation of similar educational approaches and critical viewpoints; the adoption of the body as an analyser of the quality of life; the particular attention that the planners pay to the perceptive and qualitative survey of the neighbourhood. The results of the sociological research, which has clearly revealed the children's lack of autonomy in their everyday movements, are in some ways similar to those obtained in other studies. However, they appear even more worrying considering that they have been gathered in Ferrara, a city considered one of the most liveable cities in Italy and a "city for cyclists" on the European level. The word that characterises the results of the study is "limit". We reckon that as the situation persists, it shall not only modify the autonomy of the children, who increasingly adopt their parents' models of behaviour and do not perceive the city as a place where they can live and play, but, in the long run, even their very desires are limited. (PsycINFO Database Record (c) 2012 APA, all rights reserved)

AD - Balzani, Marcello: University of Ferrara, Italy Borgogni, Antonio: UISP Ferrara, Italy

ER -

TY - JOUR

ID - 739

T1 - The relationship between mother-child interaction, potential child abuse, and parenting stress of adolescent mothers in substitute care

A1 - Asencio,Diana Lea

Y1 - 2003///

N1 - Dissertation Abstract: 2003-95012-287

English

Dissertation Abstract

KW - PsycInfo

KW - Adolescent Mothers

KW - Child Abuse

KW - Mother Child Communication

KW - Childhood Play Behavior

KW - Mother Child Relations

KW - Observation Methods

KW - Parenting Skills

KW - Stress

RP - NOT IN FILE

SP - 6085

JF - Dissertation Abstracts International: Section B: The Sciences and Engineering

VL - 63:

IS - 12-B

N2 - The current study investigated differences in mother-child interactions within adolescent mothers, who are in substitute care, and their children. Videotaped interactions of three different contextual situations (i.e., routine caregiving, teaching, and child-directed free play) were coded via two observational systems to determine the usefulness of the interactional data for identifying dyads in need of intervention. In addition, two self-report measures of parenting stress and potential child abuse were compared to the observational systems in order to assess any correlations. Measures utilized included a demographic questionnaire, the Child Abuse Potential Inventory (CAPI), the Parenting Stress Inventory-Short Form (PSI-SF), the Budd Interaction Evaluation (BUDDIE), and the Mother-Child Interaction Scale (MCIS). Findings showed that the two observational methods were correlated for routine caregiving and teaching, but not for child-directed free play. However, no correlation was found between either self-report measure and the observational systems. The data did support some differences between the contextual situations for both observational systems. The differences, or lack thereof, found in the BUDDIE varied depending upon the type of formula used to calculate negative and positive attention proportions. In general, more negative attention was given during the teaching situation. However, the findings suggest more positive attention was given during child-directed free play. On the MCIS, significant differences were found between routine caregiving and teaching as well as between teaching and child-directed free play. The current research provides a contribution to the literature concerning adolescent mother-child interactions, potential for child maltreatment, and parenting stress among mothers who are in substitute care. In particular, it highlights the importance of using a multi-method approach when assessing this area. In addition, the findings indicated that adolescent mothers in substitute care may be at risk and require intervention. This research suggests that the contextual situation utilized during behavioral observations, as well as the manner in which data are calculated, impacts the findings. Due to the methodological limitations of this study and the concerns raised, future research is needed to support these findings more conclusively and to add to the relatively sparse literature for this specific population. (PsycINFO Database Record (c) 2012 APA, all rights reserved)

SN - 0419-4217

AD - Asencio, Diana Lea: Depaul U., US

ER -

TY - JOUR

ID - 740

T1 - Insufficient responsiveness in ambivalent mother-infant relationships: Contextual and affective aspects.

[References]

A1 - Harel, Judith

Y1 - 2003///

N1 - Peer Reviewed Journal: 2003-07446-006

English

Journal; Peer Reviewed Journal

KW - PsycInfo

KW - Attachment Behavior

KW - Emotional Regulation

KW - Emotional States

KW - Mother Child Relations

KW - Separation Anxiety

KW - Dyads

KW - Emotional Control

KW - Mothers

RP - NOT IN FILE

SP - 371

EP - 383

JF - Infant Behavior & Development

JA - Infant behav

VL - 26:

IS - 3

N2 - The present study focused on mother-infant relationships across different situations in order to compare the ways secure and ambivalent-resistant dyads modulate positive and negative emotionality. Sixty-one Israeli mothers and their 12-month-old non-risk infants participated in a sequence of free play, Ainsworth Strange Situation, and a task involving filling out questionnaires, one of which referred to anxiety in the dyad. A comparison between the mothers of secure (n = 49) and ambivalent (n = 12) infants indicated that the latter group displayed less positive affect in play, reported more separation anxiety, but, at the same time, did not respond in a sufficient way to their child's bids for attention after experiencing a stressful separation. This pattern of results throws further light on the antecedents and correlates of ambivalent mother-child relationships. (PsycINFO Database Record (c) 2012 APA, all rights reserved) (journal abstract)

SN - 0163-6383

AD - Harel, Judith: Department of Psychology, University of Haifa, Haifa, Israel Scher, Anat: Department of Education, University of Haifa, Haifa, Israel

ER -

TY - JOUR

ID - 741

T1 - Increasing peer-directed social-communication skills of children enrolled in Head Start. [References]

A1 - Craig-Unkefer, Lesley A.

Y1 - 2003///

N1 - Peer Reviewed Journal: 2003-07280-001

English

Journal; Peer Reviewed Journal

KW - PsycInfo

KW - At Risk Populations

KW - Communication Skills

KW - Early Intervention

KW - Language Delay

KW - Social Skills

KW - Childhood Play Behavior

KW - Interpersonal Interaction

KW - Peer Relations

KW - Preschool Students

KW - Project Head Start

RP - NOT IN FILE

SP - 229

EP - 247

JF - Journal of Early Intervention

VL - 25:

IS - 4

N2 - The current study assessed the effects of an intervention to improve the social-communicative interactions of six children at-risk for delays in language and social skills enrolled in Head Start. A multiple-baseline design across three mixed-gender dyads was used to determine the effects of a three-component intervention on



children's verbal interactions and play. During the baseline, intervention, and generalization phases, children's social-communicative behaviors were videotaped, coded, and summarized. When the plan-play-report intervention was introduced in each dyad, children's social-communicative behaviors increased. Increases occurred in descriptive statements, requests, and language complexity and diversity. During the intervention, children also engaged in more complex play behaviors. Children generalized changes in social communication, interaction, and play to untrained peers from different classrooms. (PsycINFO Database Record (c) 2012 APA, all rights reserved) (journal abstract)

SN - 1053-8151

AD - Craig-Unkefer, Lesley A.: U Minnesota, Educational Psychology, Minneapolis, MN, US Kaiser, Ann P.: Vanderbilt U, Nashville, TN, US

ER -

TY - JOUR

ID - 742

T1 - Play outside! Contributions of the urban environment to the development and the well-being of the children. [French]. [References]

A1 - Jutras,Sylvie

Y1 - 2003///

N1 - Peer Reviewed Journal: 2003-07215-011

French

Journal; Peer Reviewed Journal

KW - PsycInfo

KW - Childhood Development

KW - Childhood Play Development

KW - Social Environments

KW - Urban Environments

KW - Well Being

KW - Childhood Play Behavior

KW - Intervention

KW - Neighborhoods

KW - Playgrounds

KW - Safety

KW - Social Issues

RP - NOT IN FILE

SP - 257

EP - 266

JF - Canadian Psychology/Psychologie canadienne

VL - 44:

IS - 3

N2 - This article brings together knowledge from environmental, community, developmental and health psychology for two purposes: The first is to examine the influence of the urban environment on children's wellness and on how children benefit from their environment to play and develop. The second objective presents recommendations regarding intervention, research and social policy for psychologists to follow favouring children's development within the urban environment. We focus on two urban environments: Spaces adjoining their residence provide children with stimulation, opportunities to run around, play and explore the physical and social world, develop personal identity, self-esteem and enhance their ability to deal with stress. The second urban environment we focus on are playgrounds, which can also serve children's physical, cognitive and social developmental needs. Physical, cognitive and psychological limitations make children vulnerable to traffic accidents. The article continues with the presentation of an action plan. There are a number of ways to increase place attachment and sense of belonging within the neighborhood so that children can play safely. (PsycINFO Database Record (c) 2012 APA, all rights reserved)

SN - 0708-5591

AD - Jutras, Sylvie: U Quebec a Montreal, Dept de psychologie, Montreal, PQ, Canada

ER -

TY - JOUR

ID - 743

T1 - The role of mother-child joint play in the early development of children's conduct problems: A longitudinal observational study. [References]

A1 - Gardner,Frances; Ward,Sarah; Burton,Jennifer; Wilson,Charlotte

Y1 - 2003///

N1 - Peer Reviewed Journal: 2003-06755-004

English

Journal; Peer Reviewed Journal

KW - PsycInfo

KW - Behavior Problems

KW - Mother Child Relations

KW - Psychosocial Development

KW - Recreation

KW - Early Childhood Development

RP - NOT IN FILE

SP - 361

EP - 378

JF - Social Development

VL - 12:

IS - 3

N2 - This observational study examined the relationship between mother-child spontaneous joint play and the development of conduct problems in preschoolers, using a short-term longitudinal design. The sample consisted of 60 children showing a range of levels of conduct problems, recruited at their third birthday through community health services in low SES areas. Spontaneous joint play and other mother-child activities were coded from naturalistic, unstructured observations in the home. Amount of time spent in joint play at age 3 predicted individual improvement in conduct problems at age 4, and importantly, this association was independent of initial level of child conduct problems and hyperactivity, social class, maternal depression, and frequency of negative mother-child interactions. The amount of time the child spent unoccupied and not interacting with mother independently predicted worsening conduct scores over time. However, time spent in other activities, including joint conversation and solitary play did not predict change in conduct scores over time. The results suggest that positive and proactive parenting processes such as joint play may make a unique contribution to the very early development of conduct problems, independent of other risk factors... (PsycINFO Database Record (c) 2012 APA, all rights reserved) (journal abstract)

SN - 0961-205X

AD - Gardner, Frances: U Oxford, Oxford, United Kingdom Ward, Sarah: U Oxford, Oxford, United Kingdom

Burton, Jennifer: U Oxford, Oxford, United Kingdom Wilson, Charlotte: U Oxford, Oxford, United Kingdom

ER -

TY - JOUR

ID - 744

T1 - Differentiating among insecure mother-infant attachment classifications: A focus on child-friend interaction and exploration during solitary play at 36 months. [References]

A1 - McElwain,Nancy L.

Y1 - 2003///

N1 - Peer Reviewed Journal: 2003-05401-004

English

Journal; Peer Reviewed Journal

KW - PsycInfo

KW - Attachment Behavior

KW - Childhood Play Behavior

KW - Emotional Security

KW - Friendship

KW - Mother Child Relations

KW - Avoidance

KW - Early Childhood Development

KW - Exploratory Behavior

KW - Mothers  
 KW - Resistance  
 KW - Sensitivity (Personality)  
 RP - NOT IN FILE  
 SP - 136  
 EP - 164  
 JF - Attachment & Human Development  
 JA - Attach.Hum.Dev.  
 VL - 5:  
 IS - 2

N2 - Utilizing data from the NICHD Study of Early Child Care, the primary objective of the current report was to examine how avoidant and resistant mother-infant attachment classifications at 15 months were differentially associated with children's interaction with a same-sex friend and exploration during solitary play at 36 months. The added contributions of attachment security at 36 months and maternal sensitivity from 6 to 36 months to the prediction of child outcomes were also explored. As hypothesized, an avoidant attachment history was related to more instrumental aggression during child-friend interaction, whereas a resistant attachment history was associated with less self-assertion/control among friends and less attention and pretend play during exploration. Maternal sensitivity and concurrent attachment security also made unique contributions to the prediction of child outcomes at 36 months, although associations with 15-month attachment remained significant when these subsequent measures of the mother-child relationship were considered. Few differences emerged for the disorganized mother-infant attachment category in this relatively low-risk sample. Results underscore the need to differentiate between avoidant and resistant attachment groups and illustrate how... (PsycINFO Database Record (c) 2012 APA, all rights reserved) (journal abstract)

SN - 1461-6734  
 ER -

TY - JOUR  
 ID - 746

T1 - Facilitating peer-group entry in kindergartners with impairments in social communication. [References]

A1 - Beilinson,Jill Selber; Olswang,Lesley

Y1 - 2003///

N1 - Peer Reviewed Journal: 2003-00300-005

English

Journal; Peer Reviewed Journal

KW - PsycInfo

KW - Communication Disorders

KW - Communication Skills

KW - Communication Skills Training

KW - Social Interaction

KW - Early Intervention

KW - Peer Relations

RP - NOT IN FILE

SP - 154

EP - 166

JF - Language, Speech, and Hearing Services in Schools

VL - 34:

IS - 2

N2 - This series of case studies examined the efficacy of intervention designed to teach peer-group entry skills to kindergartners with social interaction and communication deficits. The participants were 3 kindergartners at the University of Washington Experimental Educational Unit (EEU) who were selected because of difficulty with peer-group entry and cooperative play as compared to other children in the classroom. The intervention program included direct treatment of the children by the primary researcher and teachers in the classroom. The intervention was modeled on research describing a sequential peer-entry hierarchy that incorporated the children moving from low risk strategies to high-risk strategies. Specifically, the treatment focused on teaching the children to use props to facilitate the production of high-risk verbal statements. Results demonstrated increases in (a) children's use of props and verbal statements to enter peer groups, (b) cooperative play, and (c) time spent

interacting with peers. Results also indicated that following treatment, the children's behaviors more closely resembled those of their comparison peers. (PsycINFO Database Record (c) 2012 APA, all rights reserved)

SN - 0161-1461

AD - Beilinson, Jill Selber: U Washington, Seattle, WA, US Olswang, Lesley B.: U Washington, Seattle, WA, US

ER -

TY - JOUR

ID - 747

T1 - Play and creation, the risk of the affect of collapse: The chess player by Stefan Zweig. [French].

[References]

A1 - Mellier, Denis

Y1 - 2002///

N1 - Peer Reviewed Journal: 2004-16657-010

French

Journal; Peer Reviewed Journal

KW - PsycInfo

KW - Chess

KW - Object Relations

KW - Recreation

KW - Separation Anxiety

RP - NOT IN FILE

SP - 265

EP - 283

JF - Psychologie Clinique et Projective

VL - 8 2002, pp. 265-283.

N2 - Play and creation have the same function: that of containing and symbolizing affects. Following the theory of M. Milner and D.W. Winnicott, we can say that the process depends on the creation of a zone of illusion shared by the subject and the outside world, as well as associative possibilities put into action through play or creation. The author then develops the hypothesis that such a process can paradoxically give birth to an experience of collapse. The observation of play in a very young child shows how his separation anxieties are gradually contained up to a point which leads him to experience paralysing anxiety. In the last short story of Stefan Zweig, a chess player risks collapse after have played a tournament. In this ultimate creation, the author may have staged a feeling which risked submerging him and for which he was said to have committed suicide. The persecutory rise of nazism, the dissention of his passionate connections and exile may have gradually broken him from his moorings, particularly his adhesive relationship to culture, and may have endangered the stability of his internal framework. (PsycINFO Database Record (c) 2012 APA, all rights reserved) (journal abstract)

SN - 1265-5449

AD - Mellier, Denis: Centre de Recherche en Psychologie et Psychopathologie Clinique, Institut de Psychologie, Universite Lumiere Lyon 2, Bron, France

ER -

TY - JOUR

ID - 748

T1 - Portraits of emergent literacy: A Vygotskian perspective on how children become more conscious of using a repertoire of strategies as part of a 'learning community'

A1 - Meaney, Wanda Magdalena

Y1 - 2002///

N1 - Dissertation Abstract: 2002-95011-075

English

Dissertation Abstract

KW - PsycInfo

KW - Early Childhood Development

KW - Literacy

RP - NOT IN FILE

SP - 4057

JF - Dissertation Abstracts International Section A: Humanities and Social Sciences

VL - 62:

IS - 12-A

N2 - When children's preconventional attempts at reading and writing are ignored or misunderstood as 'scribbles', these early attempts may be unnecessarily sacrificed for a well-intentioned adult's overemphasis on the importance of only conventions. The ethnography of this kindergarten classroom provided a 'thick description' of how emergent literacy is mediated through complex, interactive cognitive and social processes. In turn, social contexts such as classrooms influence children's opportunities to explore and grow in strategic control of their literacy development. Towards the end of kindergarten, I decided to extend the study by following eight of these children into grade one. The resultant intensive case studies are highly informative in covering a range of early literacy development profiles over time to highlight the variability in children's emergent literacy. Vygotsky's sociocultural theory of learning has been instrumental in helping us to understand how educators play a primary role in apprenticing students into the classroom culture. Children's emergent literacy is, therefore, an integral part of how they are supported in their interactions with both learners and teachers. The direct observation and documentation of actual classroom practices over time can serve as a powerful means for understanding teaching and learning as a social-communicative process. To plan for instruction accordingly, educators need to explore what hypotheses and ideas students bring to the classroom and how these understandings play out in the classroom. Key literacy events such as the journal writing center provide a revisitable trail for both children and teachers. The growth of young children into skilled participants in society is often accomplished through children's routine, and often tacit, guided participation in ongoing cultural activities, such as emergent literacy. Risk-taking is a critical strategy for children as they learn to read and write. By having routine ways of interacting with children such as the journal writing center we are in a better position to understand their tacit-knowledge and motives. Teachers have to encourage supported risk-taking, recognizing that for some children 'overcoming dependency on conversational partners', such as teachers and parents, may present the greatest hurdle in their literacy development. (PsycINFO Database Record (c) 2012 APA, all rights reserved)

SN - 0419-4209

AD - Meaney, Wanda Magdalena: U Calgary, Canada

ER -

TY - JOUR

ID - 749

T1 - The relationships among play, language development and parenting in children born prematurely with medical complications

A1 - Hebert, Heather Martin

Y1 - 2002///

N1 - Dissertation Abstract: 2002-95010-315

English

Dissertation Abstract

KW - PsycInfo

KW - Childhood Play Development

KW - Language Development

KW - Parent Child Relations

KW - Premature Birth

KW - Complications (Disorders)

RP - NOT IN FILE

SP - 5407

JF - Dissertation Abstracts International: Section B: The Sciences and Engineering

VL - 62:

IS - 11-B

N2 - Preterm low birth weight (LBW) infants have frequently been reported to have persistent impairments in their development of language, cognitive, and social skills (Hunt Cooper, & Tooley, 1988; Landry, Fletcher, Denson, & Chapieski, 1993). Play and language development, specifically, have been shown to be related in numerous studies with normal children (e.g., Bates, Bretherton, Shore, and McNew, 1983; Bornstein, Vibbert, Tal, and O'Donnell, 1992). The purpose of the current investigation was to explore preterm (of high or low

medical risk) and fullterm children's and toddlers' play and language development, and the specific parenting strategies that may facilitate or inhibit children's acquisition of these skills (i.e., maternal maintaining and structure). The participants were 365 urban and rural, low socioeconomic status (SES) families, recruited initially during 1990 and 1991 for a longitudinal study of parenting and developmental outcomes in preterm LBW children. The data was collected across five timepoints: when the children were 6, 12, 24, 40 and 54 months of age. Statistical analyses using growth curve modeling revealed that risk status predicted the children's level of both toyplay and language skills at all timepoints. However, risk status did not predict the children's rate of growth in either domain. Higher levels of maternal maintaining facilitated both play and language level across time. Higher levels of maternal structure predicted lower language levels across all timepoints. Higher levels of maternal structure predicted higher levels of toyplay at younger ages and lower levels of toyplay at older ages. Language and play levels at two and a half years were related, but the effect was moderated by risk status and SES. Preterm children from lower SES families had less of a relation between their toyplay and language scores than did preterm children from higher SES families or fullterm children. The major implications of these findings are: (1) evaluating the risk status of children born prematurely is critical in predicting cognitive outcomes and (2) maternal maintaining and structure have an important impact on the development of toyplay and language skills over the first four years of life. (PsycINFO Database Record (c) 2012 APA, all rights reserved)

SN - 0419-4217

AD - Hebert, Heather Martin: U Houston, US

ER -

TY - JOUR

ID - 750

T1 - A study of the effect of group family play on family relations for families with children considered at-risk for educational failure

A1 - Baldus, Carmen Colleen

Y1 - 2002///

N1 - Dissertation Abstract: 2002-95007-074

English

Dissertation Abstract

KW - PsycInfo

KW - Academic Failure

KW - Family Relations

KW - Play Therapy

RP - NOT IN FILE

SP - 3587

JF - Dissertation Abstracts International Section A: Humanities and Social Sciences

VL - 62:

IS - 10-A

N2 - This study investigated the difference in family health and parenting stress between families with children identified as at-risk for educational failure who participated in Group Family Play and families who did not participate. Family health was assessed through use of the health/competence, style, and conflict scales of the Beaver's Self Report Family Inventory (SFI), while parenting stress was measured by the Parenting Stress Index-3rd Edition (PSI). A total of 174 family members from 43 families participated in the study. Families were randomly assigned to one of the four groups comprising a Solomon Four Group Design. Groups 1 and 3 participated in an informational meeting and six sessions of Group Family Play, while Groups 2 and 4 attended the informational meeting, but did not participate in Group Family Play. Of the 43 families who participated, SFI data were completed on 121 individuals. Groups 1 and 2 took both pre- and posttests to determine differences in health/competence, style, conflict, and parenting stress. Groups 3 and 4 took only the posttest. A one-way analysis of variance (ANOVA) was computed to determine if there was a significant difference between the groups. The ANOVA did not detect a statistically significant difference at the .05 level on measures of health/competence, style, or conflict between families who participated in family play and families who did not participate. The ANOVA was not applied to the data received on the PSI due to a limited parent sample. Instead, a two-tailed t test was computed to look at the difference between the mean scores of parents who participated in Group Family Play (Groups 1 and 3 combined) and parents who did not participate (Groups 2 and 4 combined). The t test did not result in a statistically significant difference at the .05 level. Further research

is recommended to look at the use of Group Family Play for more defined populations and with different instrumentation. Also recommended is study of family play as a therapeutic technique used in conjunction with therapy. Recommendations concerning the study of family play and its relationship to gender, age, and population are also discussed. (PsycINFO Database Record (c) 2012 APA, all rights reserved)

SN - 0419-4209

AD - Baldus, Carmen Colleen: Western Michigan U., US

ER -

TY - JOUR

ID - 751

T1 - Short-term group play therapy with Chinese earthquake victims: Effects on anxiety, depression and adjustment. [References]

A1 - Shen, Yih Jiun

Y1 - 2002///

N1 - Peer Reviewed Journal: 2002-17897-003

English

Journal; Peer Reviewed Journal

KW - PsycInfo

KW - Adjustment

KW - Anxiety

KW - Group Psychotherapy

KW - Natural Disasters

KW - Play Therapy

KW - Assistance (Social Behavior)

KW - Chinese Cultural Groups

KW - Elementary Schools

KW - Major Depression

RP - NOT IN FILE

SP - 43

EP - 63

JF - International Journal of Play Therapy

VL - 11:

IS - 1

N2 - Investigated the effectiveness of short-term child-centered group play therapy in elementary school settings with Chinese children in Taiwan who experienced an earthquake in 1999. 65 children (aged 8-12 yrs) were screened. Children in the experimental group scored significantly lower on anxiety level and suicide risk after play therapy than did children in the control group. The effects of the treatment support previous studies of play therapy with American children. These findings reveal the possibility of disaster intervention services adopting Western helping techniques with school children of non-Western cultures. (PsycINFO Database Record (c) 2012 APA, all rights reserved)

SN - 1555-6824

AD - Shen, Yih-Jiun: Texas Tech U, Coll of Education, Div of Educational Psychology & Leadership, Lubbock, TX, US

ER -

TY - JOUR

ID - 752

T1 - An examination of the relationship between cycle training, cycle accidents, attitudes and cycling behaviour among children. [References]

A1 - Colwell, John

Y1 - 2002///

N1 - Peer Reviewed Journal: 2002-15828-002

English

Journal; Peer Reviewed Journal

KW - PsycInfo

KW - Accidents

KW - Child Attitudes

KW - Childhood Play Behavior

KW - Ground Transportation

KW - Recreation

KW - Education

KW - Human Sex Differences

KW - Injuries

KW - Safety

KW - Social Behavior

RP - NOT IN FILE

SP - 640

EP - 648

JF - Ergonomics

VL - 45:

IS - 9

N2 - Around 40% of 10 to 11-yr-old children receive cycle training every year in the UK, but concern has been expressed over the efficacy of training courses. One argument is that accidents occur too infrequently to be a viable evaluative criterion, and attitudes and behavior have been suggested as alternatives. A questionnaire that measured a number of variables including accidents, attitudes, and behavior was completed by 336 participants (aged 13-16 yrs) from 2 schools in the London Borough of Bromley. At least 1 cycling injury had been sustained by 58.3% of respondents, requiring hospital treatment in 19.1% of cases. Girls reported fewer accidents than boys. No relationship between training and accidents was found. A principal components analysis (PCA) of the attitudes items produced a 'safe attitudes' factor. Girls displayed 'safer' attitudes, but there was no evidence that training produced safer attitudes. A PCA of the cycling behavior scales produced 2 factors, 'safe cycling' and 'showing off.' Safe cyclists who obeyed basic safety rules were less likely to sustain cycle injuries, but showing off was not related to accidents. Girls were less likely to show off, but the safe behavior gender difference did not reach significance. Training did not relate to either factor. (PsycINFO Database Record (c) 2012 APA, all rights reserved)

SN - 0014-0139

AD - Colwell, John: De Montfort U, Dept of Psychology & Speech & Language Therapy, Leicester, United Kingdom  
Culverwell, Angus: London Borough of Bromley, Civic Ctr, Road Safety Unit, Bromley, United Kingdom

ER -

TY - JOUR

ID - 754

T1 - Improving the social communication skills of at-risk preschool children in a play context. [References]

A1 - Craig-Unkefer, Lesley A.

Y1 - 2002///

N1 - Peer Reviewed Journal: 2002-12813-001

English

Journal; Peer Reviewed Journal

KW - PsycInfo

KW - At Risk Populations

KW - Childhood Play Behavior

KW - Communication Skills

KW - Social Interaction

KW - Behavior Problems

KW - Language Delay

RP - NOT IN FILE

SP - 3

EP - 13

JF - Topics in Early Childhood Special Education

VL - 22:

IS - 1



N2 - Examined the effects of a 3-component intervention on the social-communicative interactions of 6 preschool children (aged 3yrs 5mo-3yrs 11mo) at risk for language delays and behavior problems. In a multiple baseline design across 3 dyads, children were taught to (1) plan their play, (2) use conversational social interaction strategies, and (3) self-evaluate their play interactions. The number of social communicative behaviors by each child increased following introduction of the intervention condition, as did their use of descriptive and request utterances during play sessions. Increases in linguistic complexity, diversity, and play complexity also were associated with the intervention. It is suggested that this intervention holds promise for improving social, linguistic, and play behaviors in preschoolers at risk for language delays and behavior problems. (PsycINFO Database Record (c) 2012 APA, all rights reserved)

SN - 0271-1214

AD - Craig-Unkefer, Lesley A: U Illinois, Chicago, IL, US Kaiser, Ann P.: Vanderbilt U, Nashville, TN, US

ER -

TY - JOUR

ID - 755

T1 - Parent-Infant Relationship Global Assessment Scale: A study of its predictive validity. [References]

A1 - Aoki, Yutaka

Y1 - 2002///

N1 - Peer Reviewed Journal: 2002-04012-002

English

Journal; Peer Reviewed Journal

KW - PsycInfo

KW - Infant Development

KW - Mother Child Relations

KW - Prediction

KW - Psychological Assessment

KW - Statistical Validity

KW - Behavior Problems

KW - Childhood Play Behavior

KW - Interpersonal Interaction

KW - Mental Health

KW - Rating Scales

RP - NOT IN FILE

SP - 493

EP - 497

JF - Psychiatry and Clinical Neurosciences

VL - 56:

IS - 5

N2 - The Parent-Infant Relationship Global Assessment Scale (PIRGAS; Zero to Three, 1994) provides a continuously distributed scale of infant-parent relationship adaptation, ranging from "well-adapted" to "dangerously impaired." The present study examined the predictive validity of the PIRGAS in a high-risk sample by coding relationship adaptation level from a single sample of 10 min of unstructured free play between mothers (aged 19-35 yrs) and their 20-mo-old infants and examining its relationship to subsequent interaction with mothers and behavior problems at 24 mo. Relationship adaptation assessed reliably from observations of only 10 min of free play between mothers and their infants at 20 mo of age using PIRGAS predicted subsequent mother-infant interaction in a laboratory based problem-solving paradigm (Crowell procedure) at 24 mo and internalizing symptomatology of Child Behavior Checklist at age 24 mo. These results contribute to the predictive validity of the PIRGAS as a measure of mother-infant relationship adaptation. (PsycINFO Database Record (c) 2012 APA, all rights reserved)

SN - 1323-1316

AD - Aoki, Yutaka: Tokai U School of Medicine, Dept of Psychiatry & Behavioral Science, Iseharashi

Bouseidai, Japan Zeanah, Charles H.: Tulane U School of Medicine, Inst of Infant & Early Childhood Mental

Health, New Orleans, LA, US Heller, Sherryl Scott: Tulane U School of Medicine, Inst of Infant & Early

Childhood Mental Health, New Orleans, LA, US Bakshi, Sudha: Children's Hosp of Philadelphia, Philadelphia,

PA, US

ER -

TY - JOUR

ID - 756

T1 - Childhood transformed? Risk perceptions and the decline of free play. [References]

A1 - O'Brien, Jonathon

Y1 - 2002///

N1 - Peer Reviewed Journal: 2002-02777-002

English

Journal; Peer Reviewed Journal

KW - PsycInfo

KW - Childhood Play Behavior

KW - Health

KW - Parental Attitudes

KW - Risk Perception

KW - Trends

KW - Occupational Therapists

KW - Parent Child Relations

KW - Recreation

RP - NOT IN FILE

SP - 123

EP - 128

JF - The British Journal of Occupational Therapy

VL - 65:

IS - 3

N2 - Occupational therapists have been concerned with the health-promoting aspects of children's play. The evidence suggests that children's freedom to play away from adult supervision has declined in recent years and that parental perception of risk may be a factor in this. This research used a qualitative approach to explore 6 parents' views on how their fear of risk might be shaping their children's play. The parents were aged 34-46 yrs and their children were 8 yrs old. The parents stated that their children were now more likely to take part in activities supervised by adults. The article shows that these findings may be linked to national trends and that occupational therapists should be concerned about the health implications of these changes. It is suggested that further research should take into account other factors that might affect children's play. (PsycINFO Database Record (c) 2012 APA, all rights reserved)

SN - 0308-0226

AD - O'Brien, Jonathon: Walton Ctr for Neurology & Neurosurgery, Liverpool, United Kingdom Smith, Jenny: U Brighton, School of Healthcare Professions, Eastbourne, ESX, United Kingdom

ER -

TY - JOUR

ID - 758

T1 - Cultural constraints on children's play. [References]

A1 - Lancy, David F.

Y1 - 2002///

N1 - Book: 2002-00366-003

English

Book; Edited Book

KW - PsycInfo

KW - Childhood Play Behavior

KW - Cooperation

KW - Human Sex Differences

KW - Safety

KW - Sociocultural Factors

RP - NOT IN FILE

SP - 51

EP - 60

JF - Roopnarine, Jaipaul L [Ed]

VL - :

IS - 2002

N2 - (from the chapter) Rather than considering strategies to increase, channel, or promote children's play, this chapter considers the many constraints that exist to curb it. There are numerous culture constrains on children's play. Imposing limits on where and how vigorously children may play in the interest of safety. Imposing chores earlier for girls than boys. Ensuring that play is appropriate to the child's sex. Providing a finite set of scripts which children may draw on in play. Promoting an ethos of cooperation, at least where children are concerned. The sheer physical size of the community influences the composition of the play group. Failing to provide a "benign environment", the society limits children's play time. All of which suggests that the benefits of play to children must be extensive and profound in order to overcome these pervasive attempts at restraint. (PsycINFO Database Record (c) 2012 APA, all rights reserved)

AD - Lancy, David F.: Utah State U, UT, US

ER -

TY - JOUR

ID - 760

T1 - The relation of medical risk and maternal stimulation with preterm infants' development of cognitive, language and daily living skills

A1 - Smith,Karen E; Landry,Susan

Y1 - 1996///

N1 - Peer Reviewed Journal: 1996-06597-008

English

Journal; Peer Reviewed Journal

KW - PsycInfo

KW - Cognitive Development

KW - Infant Development

KW - Language Development

KW - Mother Child Relations

KW - Premature Birth

KW - At Risk Populations

KW - Longitudinal Studies

RP - NOT IN FILE

SP - 855

EP - 864

JF - Child Psychology & Psychiatry & Allied Disciplines

VL - 37:

IS - 7

N2 - 212 very low birth-weight (VLBW) high-risk (HR) and low-risk (LR) preterm infants and 128 full-term infants (FT) from low socioeconomic homes were studied with their mothers at 6 and 12 mo of age. Infants' cognitive, language and daily living skills were evaluated in relation to mothers' warm sensitivity, use of strategies which maintained the infants' attention, and directiveness. Results show that VLBW HR Ss displayed lower cognitive, receptive language, and daily living scores at 6 mo, and slower rates of change over 6-12 mo of age for cognitive skills than VLBW LR and FT Ss. Higher levels of maternal attention-maintaining (AM) were positively related to infant development for all groups. During toy play, AM was most strongly related to expressive language skills for HR infants. In addition, AM during toy play and daily activities related positively to HR and LR infants' development of cognitive and language skills. (Japanese abstract). (PsycINFO Database Record (c) 2013 APA, all rights reserved)

SN - 0021-9630

AD - Smith, Karen E.: U Texas, Medical Branch, Dept of Pediatrics, Galveston, TX, US

ER -

TY - JOUR

ID - 761

T1 - Parenting and family support in Japan for 6- to 8- year-old children weighing under 1000 grams at birth

A1 - Itoigawa,Naosuke

Y1 - 1996///

N1 - Peer Reviewed Journal: 1996-06905-001

English

Journal; Peer Reviewed Journal

KW - PsycInfo

KW - Birth Weight

KW - Childhood Development

KW - Family Structure

KW - Parental Characteristics

KW - Parental Investment

KW - Fathers

KW - Premature Birth

RP - NOT IN FILE

SP - 477

EP - 490

JF - International Journal of Behavioral Development

VL - 19:

IS - 3

N2 - Explored paternal involvement in the caregiving of extremely low-birthweight (ELBW) children, specifically sociodemographic factors related to the family and individual biological factors related to ELBW. Possible developmental effects were also investigated. 28 children 6-8 yrs old with a mean birthweight of 845.5 g and a mean gestational age of 27.4 wks were administered developmental testing. Ss' parents completed questionnaires, an interview, and other measures. Paternal involvement in caregiving is related to family composition; cooperative fathers are more likely to come from families that have no older female sibling(s) and/or grandparent(s). Individual perinatal risk variables, the child's IQ, and paternal variables (age and socioeconomic status) were not related to paternal cooperativeness. Ss with noncooperative fathers prefer to play alone at 3-5 yrs of age, while Ss with cooperative fathers prefer to play with peers. (PsycINFO Database Record (c) 2013 APA, all rights reserved)

SN - 0165-0254

AD - Itoigawa, Naosuke: Osaka U, Faculty of Human Sciences, Dept of Comparative & Developmental Psychology, Osaka, Japan

ER -

TY - JOUR

ID - 763

T1 - Assessment of preschool play interaction behaviors in young low-income children: Penn Interactive Peer Play Scale

A1 - Fantuzzo, John W.

Y1 - 1995///

N1 - Peer Reviewed Journal: 1995-39411-001

English

Journal; Peer Reviewed Journal

KW - PsycInfo

KW - Childhood Play Behavior

KW - Peer Relations

KW - Rating Scales

KW - Test Construction

KW - Test Validity

KW - Blacks

KW - Preschool Students

KW - Urban Environments

RP - NOT IN FILE

SP - 105

EP - 120

JF - Early Childhood Research Quarterly

VL - 10:

IS - 1

N2 - Developed and validated the Penn Interactive Peer Play Scale (PIPPS), a teacher-rating instrument designed to assess the interactive play behaviors of preschool children. The PIPPS was designed (1) to differentiate children who demonstrate positive play relationships with peers from those who are less successful with peers, (2) to identify play strengths of resilient preschool children living in high risk urban environments, and (3) to inform early childhood intervention. 38 teachers from 5 representative urban Head Start centers completed the measure on 312 African-American children enrolled in Head Start. Exploratory factor analyses revealed 3 reliable underlying dimensions: Play Interaction, Play Disruption, and Play Disconnection. Concurrent validity was established by comparing the factor patterns of the PIPPS and the Social Skills Rating System. (PsycINFO Database Record (c) 2013 APA, all rights reserved)

SN - 0885-2006

AD - Fantuzzo, John W.: U Pennsylvania, Graduate School of Education, Philadelphia, US

ER -

TY - JOUR

ID - 764

T1 - Linking assessment to intervention for children with developmental disabilities or at-risk for developmental delay: The Developmental Play Assessment (DPA) instrument. [References]

A1 - Lifter, Karin

Y1 - 2000///

N1 - Book: 2001-01062-008

English

Book; Edited Book

KW - PsycInfo

KW - Autism

KW - Childhood Play Behavior

KW - Diagnosis

KW - Measurement

KW - Treatment

RP - NOT IN FILE

SP - 228

EP - 261

JF - Gitlin-Weiner, Karen [Ed]; Sandgrund, Alice [Ed]; Schaefer, Charles [Ed]

VL - :

IS - 2000

N2 - (from the book) Using a developmental foundation, K. Lifter's Developmental Play Assessment scale demonstrates how play behaviors can be employed as the basis for diagnostic statements leading to specific interventions. Lifter's technique and scale are particularly geared toward the assessment of children who are classified within the autistic-spectrum disorders. It is noted that most promising about this technique is its presentation of a play-based intervention for these typically difficult-to-treat youngsters. (PsycINFO Database Record (c) 2013 APA, all rights reserved)

AD - Lifter, Karin: Northeastern U, Dept of Counseling Psychology, Rehabilitation, & Special Education, Boston, MA, US

ER -

TY - JOUR

ID - 765

T1 - The impact of child abuse on children's play: A conceptual model. [References]

A1 - Cooper, Rodney J.

Y1 - 2000///

N1 - Peer Reviewed Journal: 2005-05340-005

English

Journal; Peer Reviewed Journal

KW - PsycInfo

KW - Child Abuse

KW - Childhood Development

KW - Childhood Play Behavior

KW - Occupational Therapy

KW - Sexual Abuse

RP - NOT IN FILE

SP - 259

EP - 276

JF - Occupational Therapy International

VL - 7:

IS - 4

N2 - The purpose of this article is to examine critically the impact of child abuse on children's play, using a descriptive model of children's play as a conceptual framework for this review of the literature. Play is recognized as a primary occupation of childhood by occupational therapists. When a child is exposed to an abusive or neglectful care environment his or her play development may be disrupted. Although the detrimental effects of physical, sexual or emotional abuse and neglect are well documented, relatively few studies have investigated the play of abused children. Reported effects suggest that abused or neglected children are more likely to show developmentally delayed play skills, decreased playfulness and behavioural disturbance in their play, which may place them at greater risk for learning and social problems. Occupational therapists often use play, including play therapy, to assess and treat abused children. This analysis highlights the need for occupational therapists to evaluate how play-based therapeutic approaches can best meet the developmental and emotional needs of abused and neglected children. Recommendations are made for occupational therapists to be more knowledgeable about child abuse and to address the need for research into the specific effects of child abuse on children's play. (PsycINFO Database Record (c) 2013 APA, all rights reserved) (journal abstract)

SN - 0966-7903

AD - Cooper, Rodney J.: University of Queensland, Brisbane, QLD, Australia

ER -

TY - JOUR

ID - 766

T1 - Psychological markers in the detection of autism in infancy in a large population

A1 - Baron-Cohen,Simon; Cox,Anthony; Baird,Gillian; Sweettenham,John; Nighingale,Natasha

Y1 - 1996///

N1 - Peer Reviewed Journal: 1996-03077-005

English

Journal; Peer Reviewed Journal

KW - PsycInfo

KW - Attention

KW - Autism

KW - Childhood Play Behavior

KW - Delayed Development

KW - Gestures

KW - Followup Studies

KW - Psychodiagnosis

RP - NOT IN FILE

SP - 158

EP - 163

JF - The British Journal of Psychiatry

VL - 168:

IS - 2

N2 - 16,000 children in the southeast of England were screened for autism during their routine 18-mo-old developmental check-up, using the Checklist for Autism in Toddlers (CHAT). 12 consistently failed 3 key items (protodeclarative pointing, gaze-monitoring, and pretend play) that were predicted would identify Ss at risk for receiving a diagnosis of autism. Of these, 10 (83.3%) Ss received a diagnosis of autism. When the 10 autistic Ss were reassessed at 3.5 yrs of age, their diagnosis remained the same. Of 22 Ss who consistently failed either protodeclarative pointing and/or pretend play, none received a diagnosis of autism, but 15 (68.2%) received a diagnosis of language delay. (PsycINFO Database Record (c) 2012 APA, all rights reserved)

SN - 0007-1250

AD - Baron-Cohen, Simon: U Cambridge, Dept of Experimental Psychology, Cambridge, England

ER -

TY - JOUR

ID - 767

T1 - Can autism be detected at 18 months? The needle, the haystack, and the CHAT

A1 - Baron-Cohen,Simon; Allen,Jane; Gillberg,Christopher

Y1 - 1992///

N1 - Peer Reviewed Journal: 1993-29936-001

English

Journal; Peer Reviewed Journal

KW - PsycInfo

KW - At Risk Populations

KW - Autism

KW - Screening Tests

RP - NOT IN FILE

SP - 839

EP - 843

JF - The British Journal of Psychiatry

VL - 161 Dec 1992, pp. 839-843.

N2 - 41 toddlers (aged 17-21 mo), who were at high genetic risk for developing autism, and 50 randomly selected toddlers (aged 17-20 mo) were screened with the Checklist for Autism in Toddlers (CHAT). More than 80% of the Ss passed on all items, and none failed on more than 1 of pretend play, protodeclarative pointing, joint-attention, social interest, and social play. Four Ss in the high-risk group failed on 2 or more of these 5 key types of behavior. At follow-up at 30 mo of age, the 4 Ss who had failed on 2 or more of these key types of behavior at 18 mo received a diagnosis of autism by 30 mo. A shorter version of the CHAT is appended.

(PsycINFO Database Record (c) 2012 APA, all rights reserved)

SN - 0007-1250

AD - Baron-Cohen, Simon: U London, Inst of Psychiatry, England

ER -

TY - JOUR

ID - 768

T1 - Preschool play behavior as a predictor of risk

A1 - Gallagher,Kathleen Patricia

Y1 - 2001///

N1 - Dissertation Abstract: 2001-95024-064

English

Dissertation Abstract

KW - PsycInfo

KW - At Risk Populations

KW - Childhood Play Behavior

KW - Risk Perception

RP - NOT IN FILE

SP - 2956

JF - Dissertation Abstracts International: Section B: The Sciences and Engineering

VL - 62:

IS - 6-B

N2 - This study piloted a preschool play behavior checklist (PPBC) designed to assess domains of children's play behaviors with the goal of identifying play behaviors that might differentiate between at-risk children and non at-risk children. The Caregiver-Teacher Report Form for Ages 1-5 (ACTRF) (Achenbach, 2000) was utilized to place 51 preschool children with a mean age of 4.3922 in either an "at-risk" group or a "non at-risk" group based on their respective T-Scores (a T-Score of 65 was the cut-off score used) on three indices: (1) Total Problem Score, (2) Internalizing Score, and (3) Externalizing Score. It was the hypothesis of this researcher that children who were classified as "at-risk" by the ACTRF would exhibit different play behaviors than children who were not classified as "at-risk" by the ACTRF. Three children received scores that placed them in the "at-risk" groups and all data were converted to nominal data, thereby confining statistical analysis to conducting chi

square analyses. A total of 28 play behaviors on the PPBC reached significance with at-risk scores on the Total Problem Score, Internalizing Score, and Externalizing Score of the ACTRF/Ages 1-5. The same 28 play behaviors on the PPBC were significant ( $p < .01$ ) on all three scales of the ACTRF suggesting some reliability in their predictive utility despite inherent methodological flaws of the small at-risk group. In addition, two other items were significant ( $p < .05$ ) with at-risk T-Scores on all three scales. Implications and suggestions for future research are discussed. (PsycINFO Database Record (c) 2012 APA, all rights reserved)

SN - 0419-4217

AD - Gallagher, Kathleen Patricia: Spalding U., US

ER -

TY - JOUR

ID - 769

T1 - Relationships between peer interactive play and school success in four year-old at-risk children

A1 - Gagnon, Sandra Glover

Y1 - 2001///

N1 - Dissertation Abstract: 2001-95022-018

English

Dissertation Abstract

KW - PsycInfo

KW - At Risk Populations

KW - Childhood Play Behavior

KW - Cognitive Ability

KW - School Readiness

RP - NOT IN FILE

SP - 2530

JF - Dissertation Abstracts International: Section B: The Sciences and Engineering

VL - 62:

IS - 5-B

N2 - The purpose of this study was to examine the relationships between peer interactive play and school success in a sample of four year-old children identified as at-risk for problems in school. Forty-three males and 42 females, ranging in age from 50 to 66 months ( $M = 57.74$ ), participated in the study. Subjects were primarily Caucasian. Ratings of peer interactive play were collected from parents and teachers on the Penn Interactive Peer Play Scale (PIPPS; Fantuzzo, Coolahan, Mendez, McDermott, & Sutton-Smith, 1998; Fantuzzo, Mendez, & Tighe, 1998). Social-emotional functioning was assessed by the Vineland Social-Emotional Early Childhood Scale (SEEC; Sparrow, Balla, & Cicchetti, 1998), which was administered to parents and teachers. School success variables included measures of cognitive ability, including two subtests from the Differential Ability Scales (DAS; Elliott, 1990) and the School Readiness Composite from the Bracken Basic Concepts Scale, Revised (BBCS-R; Bracken, 1998). Simple correlations, canonical correlations, and multiple regression analyses were computed to analyze the data. Significant correlations were found between parent and teacher ratings on the PIPPS and their corresponding scores on the SEEC. Two scales on the teacher PIPPS correlated significantly with student scores on the DAS. Significant mean differences were found between parent and teacher ratings on the PIPPS. Findings are discussed with regard to situation specificity and interrater differences. Implications of these findings include the important contributions play makes to children's development of cognitive and social-emotional development. These findings provide evidence for the psychometric integrity of the PIPPS and suggest that psychologists should add measures of play to their assessment batteries with young children. Rating scales such as the PIPPS contribute to the ecological validity and multifaceted nature of preschool assessments. In addition, the utility of the PIPPS was extended beyond the initial standardization sample to include a sample of primarily Caucasian children living in a more rural area. (PsycINFO Database Record (c) 2012 APA, all rights reserved)

SN - 0419-4217

AD - Gagnon, Sandra Glover: U South Carolina, US

ER -

TY - JOUR

ID - 770



T1 - Young adolescent girls and older men: Issues of development, gender and abuse in sexual relations before the age of consent

A1 - Saul,Dale Hansen

Y1 - 2001///

N1 - Dissertation Abstract: 2001-95018-425

English

Dissertation Abstract

KW - PsycInfo

KW - Human Females

KW - Human Mate Selection

KW - Psychosexual Behavior

KW - Romance

KW - Sexual Abuse

RP - NOT IN FILE

SP - 1647

JF - Dissertation Abstracts International: Section B: The Sciences and Engineering

VL - 62:

IS - 3-B

N2 - This study explores how a history of abuse is a risk factor for early sexual experience with an older individual, of concern because of the potential for revictimization in a vulnerable population. The higher rates of STDs, pregnancy and childbearing among young abused adolescents with older sex partners indicate a need for better understanding of the psychosocial dynamics underlying this public health problem. To study these relationships, the life story narrative was selected as the method most likely to elicit context, meaning and thematic structure in participants' verbal and affective expression. Four girls, 15 and 16, identified as abused and having had a sexual relationship with an individual 4 or more years older, reflect upon their close relationships of childhood through the present and their impact on the girls' self-definition and expectations of others. As participants characterize the elements of their social world, the effects of abuse and the rationale for older partner involvement become evident through the coherence of their stories. The themes and patterns that emerge in these narratives help to delineate emotional and relational vulnerabilities in this age group and population and clarify the role romantic or sexual relationships with an older individual plays in adolescent risk-taking, self-repair and revictimization. (PsycINFO Database Record (c) 2012 APA, all rights reserved)

SN - 0419-4217

AD - Saul, Dale Hansen: The American U., US

ER -

TY - JOUR

ID - 771

T1 - Playmate selections of preschool children

A1 - Haynes,Gladys Verneal Oosting

Y1 - 2001///

N1 - Dissertation Abstract: 2001-95017-110

English

Dissertation Abstract

KW - PsycInfo

KW - Childhood Play Behavior

KW - Human Sex Differences

KW - Racial and Ethnic Differences

KW - Social Acceptance

RP - NOT IN FILE

SP - 907

JF - Dissertation Abstracts International Section A: Humanities and Social Sciences

VL - 62:

IS - 3-A

N2 - Social relationships are important in the development of young children's cognitive, language and more advanced social skills. Children who fail to develop appropriate social skills are at risk for future difficulties in interpersonal relationships, school failure and criminal behavior. Gender and race may be factors in the

development of social relationships. This study examined the selections of Caucasian and African American preschool children as they chose children "most like" them and selected playmates from photographs as well as during actual play. Overall, children were found to be more likely to identify with children of the same gender but were more likely to select familiar playmates of the same race. Children's selections of playmates from photographs predicted their selections of playmates during actual play only approximately half of the time. Findings also indicated that preschool children did not consistently prefer the same playmate but instead played with a small group of different playmates. Interventions were also implemented in an attempt to improve the status of preschool children least often chosen as playmates. Interventions used included modifications to the children's classroom environments or curriculum and peer-mediated interventions utilizing a modified peer training program. Neither intervention was found to significantly improve the number of times the least preferred children in a classroom were chosen as playmates during actual play. However, findings would suggest that interventions did result in the development of more advanced play skills. Significant correlations were found between the teacher's rankings of popularity and the number of times children were chosen as playmates during actual play as well as between teachers' rankings of popularity and the play checklist scores. Although significant, the correlation between children scores on the play checklist and the number of times they were selected as a playmate was very weak. Findings would suggest that factors other than social skills may influence children's status as a preferred playmate. (PsycINFO Database Record (c) 2012 APA, all rights reserved)

SN - 0419-4209

AD - Haynes, Gladys Verneal Oosting: U Nebraska - Lincoln, US

ER -

TY - JOUR

ID - 772

T1 - Latino mother-child dyads: Attachment, psychosocial factors, mother's perception of the child's temperament, and quality of dyadic competence

A1 - Bejarano, Anabel

Y1 - 2001///

N1 - Dissertation Abstract: 2001-95006-126

English

Dissertation Abstract

KW - PsycInfo

KW - Attachment Behavior

KW - Mother Child Relations

KW - Personality

KW - Psychosocial Factors

KW - Social Perception

KW - Dyads

KW - Latinos/Latinas

RP - NOT IN FILE

SP - 5050

JF - Dissertation Abstracts International: Section B: The Sciences and Engineering

VL - 61:

IS - 9-B

N2 - This study analyzed the mother-child relationship within a non-clinical sample of low socioeconomic status, Dominican and Puerto Rican mother-child dyads. The study examined the effects of stress, social support, maternal perception of the child's temperament, and attachment behaviors on dyadic competence for 23 dyads. Variables assessed shortly following the child's birth during the perinatal period, and at the child's age of 12 and 18 months, were used as predictors of dyadic competence in mother-child interaction during a free-play episode observed at the child's age of 18 months. The methodology included nonstandard, semi-structured stress and social support scales developed for a prior study on multi-risk mothers (Fiks, Johnson and Rosen, 1985). The stress scale measured the reported level of stress experienced in the areas of finances, living arrangements, children, family and friends. The size of the social support network was based on the number of individuals counted on by the mother, and available to help with financial, personal, and health/medical problems. The mothers' perception of her child's temperament was based on questions regarding the consistency of the child's eating and sleeping habits, activities enjoyed by the child, the degree of fussiness and ease of comforting the

child. Attachment behaviors (proximity- and contact-seeking, contact-maintaining, resistant, and avoidant behavior) and the amount of crying were assessed during two reunion episodes of a modified Strange Situation procedure at 12 months based on a 7-point dimensional rating scale (Ainsworth, Bell, Waters, and Wall, 1978). At the child's age of 18 months, the degree of mutual competence in dyadic interaction was measured by the Parent-Child Observation Guide (Bernstein, Percansky, and Hans, 1987). This scale is based on Goldberg's (1977) concept of mutual competence and rates behaviors of the mother and child that support or encourage mastery of developmental tasks. Maternal perception of the child as fussing a lot at 18 months was highly predictive of less effective maternal competence in a free play situation. This dynamic relationship was stronger than that between maternal competence and stress, social support and attachment behaviors assessed at 12 and 18 months. However, stress from living arrangements and problems with friends and family during the perinatal period were predictive of maternal competence. The relationship between social support, rates of proximity seeking and contact maintenance behaviors and maternal competence failed to yield significant results. Although the mother and child's rates of competence were not concordant, it was found that mothers who had accurate expectations of the child for the child's age, who treated the child with respect, who helped the child stay interested in a toy or activity, and remained patient with the child had higher rates of maternal competence. For the child, rates of competence were most correlated with their ability to invite an interaction or play activity with the mother, and noticing their mothers smiling at them in several situations. In addition, high rates of proximity seeking behavior during the first reunion episode was a strong predictor of the child's competence. (PsycINFO Database Record (c) 2012 APA, all rights reserved)

SN - 0419-4217

AD - Bejarano, Anabel: City U New York, US

ER -

TY - JOUR

ID - 773

T1 - Depression as a risk factor for coronary artery disease in Type I diabetes mellitus: A study of possible mechanisms

A1 - Kinder, Leslie Smithline

Y1 - 2001///

N1 - Dissertation Abstract: 2001-95004-418

English

Dissertation Abstract

KW - PsycInfo

KW - Diabetes Mellitus

KW - Heart Disorders

KW - Major Depression

KW - Risk Factors

RP - NOT IN FILE

SP - 4465

JF - Dissertation Abstracts International: Section B: The Sciences and Engineering

VL - 61:

IS - 8-B

N2 - Recent evidence has suggested that depressive symptomatology is a risk factor for the development of coronary artery disease (CAD), although little is known about mechanisms that may explain this relationship. The Pittsburgh Epidemiology of Diabetes Complications (EDC) Study is an ongoing natural history study of 658 men and women with childhood onset Type I diabetes. Previous findings from the EDC study have shown an association between baseline depressive symptoms, assessed with the Beck Depression Inventory, and new cases of CAD, defined as angina, myocardial infarction, or CAD death, at 4- and 6-year follow-up. Univariate Cox proportional hazard modeling indicates that depressive symptomatology continues to predict the development of CAD at 10-year follow-up (RR = 1.040, CI = 1.009 - .071) and that the relationship between depressive symptomatology and CAD, as defined, is stronger in women than men (men RR = 1.029, CI = 0.984 - 1.076; women RR = 1.059, CI = 1.016 - 1.104). In the full sample, having ever smoked, white blood count, fibrinogen, neuropathy, and perceived health status statistically mediate the relationship between depressive symptomatology and incidence of CAD. In women, waist-hip ratio, neuropathy, and perceived health statistically mediate the relationship. These findings suggest that smoking and inflammatory processes may account for the depression-CAD relationship in Type I diabetic men and women. In women, Insulin Resistance

Syndrome, as marked by central adiposity, may play an important role as well. Finally, it is plausible that the severity of diabetic disease, characterized by perceptions of health and neuropathy, contributes to both depressive symptoms and the development of CAD. Psychosocial factors play an important role in CAD and Type I diabetes; our data suggest that a number of mechanisms, both behavioral and physiological, may explain the relationship between depressive symptomatology and incidence of CAD in Type I diabetes. (PsycINFO Database Record (c) 2012 APA, all rights reserved)

SN - 0419-4217

AD - Kinder, Leslie Smithline: U Pittsburgh, US

ER -

TY - JOUR

ID - 774

T1 - Perceived control over caregiving: Association with mothers' and fathers' observed interactions with their 12 month old infants

A1 - Guzell, Jacqueline Rose

Y1 - 2001///

N1 - Dissertation Abstract: 2001-95004-088

English

Dissertation Abstract

KW - PsycInfo

KW - Attribution

KW - Father Child Relations

KW - Mother Child Relations

KW - Dual Careers

RP - NOT IN FILE

SP - 4447

JF - Dissertation Abstracts International: Section B: The Sciences and Engineering

VL - 61:

IS - 8-B

N2 - Research suggests that parents who believe they have little control over negative caregiving outcomes tend to regard themselves as "power disadvantaged" (Bugental, Blue, & Lewis, 1990), which may lead to their efforts to restore balance by increasing their own controlling behaviors. The risk is that this behavior may escalate over time into coercive, denigrating and abusive behavior, especially when children are regarded as "difficult" or noncompliant by their parents. While previous research has demonstrated that low perceived control may be related to highly directive/controlling behavior in mothers of preschool or older children, the present study extends those findings by focusing on the attributions and behaviors of mothers and fathers of one-year-old infants. The 66 dual-earner families were drawn from the Penn State Health and Development Project, which examined home, daycare, and health factors that affected children's development. Videotaped mother-father-infant interactions during play in the family's home were coded for directive/controlling, sensitive, and detached behaviors that were assessed for their association with infant and parent characteristics, especially parents' perception of control over negative caregiving outcomes. The a priori hypothesis that perceived control would moderate the relationship between infant difficulty and parents' directive/controlling behavior during play was confirmed for mothers, but not for fathers. The group of mothers with low perceived control averaged over 50% more instances of directive/controlling behavior than other mothers and, in addition, mothers with low perceived control who rated their infants as difficult had the highest level of directive behavior. For fathers, low perceived control was associated with more directive/controlling behavior, regardless of whether or not their infants were perceived as difficult. In the present study, parents with low perceived control did not differ from other parents on their knowledge of child development, level of education, income, or religiosity. However, mothers with low perceived control scored significantly higher on a measure of categorical thinking than other mothers.

Categorical thinking is indicative of the limited lens through which parents with low perceived control are believed to view difficult or unresponsive children, leading to script-like responses to stressful, negative parent-child caregiving situations and outcomes. (PsycINFO Database Record (c) 2012 APA, all rights reserved)

SN - 0419-4217

AD - Guzell, Jacqueline Rose: The Pennsylvania State U., US

ER -

TY - JOUR

ID - 775

T1 - Nonsocial play as a risk factor in social and emotional development. [References]

A1 - Cheah, Charissa S.

Y1 - 2001///

N1 - Book: 2001-18731-002

English

Book; Edited Book

KW - PsycInfo

KW - Childhood Play Behavior

KW - Childhood Play Development

KW - Emotional Development

KW - Psychosocial Development

KW - Risk Factors

KW - Childhood Development

KW - Cognitive Ability

KW - Emotional Control

KW - Parent Child Relations

KW - Personality Traits

KW - Problem Solving

KW - Social Skills

KW - Sociocultural Factors

RP - NOT IN FILE

SP - 39

EP - 71

JF - Goncu, Artin [Ed]; Klein, Elisa L [Ed]

VL - :

IS - 2001

N2 - (from the chapter) Examines the constructs of children's social and nonsocial play. In particular, this chapter discusses the developmental significance of social play and the potential risks associated with certain forms of nonsocial play. It is reported that social play is associated with positive markers of both social and cognitive competence. Similarly, solitary-passive behaviors were associated positively with competent problem solving, emotion regulation, and task persistence. Conversely, numerous risk factors associated with other types of nonsocial play were outlined. Next, the advantages and disadvantages of various methods used to study children's interactions and play were examined. Finally, the origins of individual and group variability found in social and nonsocial play, including dispositional factors, parental influences, and cultural contexts were discussed. The research presented suggests that cultural milieus and societal values create a framework within which these different behaviors may be evaluated. (PsycINFO Database Record (c) 2012 APA, all rights reserved)

AD - Cheah, Charissa S. L.: Yale U, Dept of Psychology, New Haven, CT, US

ER -

TY - JOUR

ID - 776

T1 - Children in play, story, and school

A1 - Goncu, Artin

Y1 - 2001///

N1 - Book: 2001-18731-000

English

Book; Edited Book

(Created by PsycINFO) Part I. Introduction \* Children in play, story, and school: A tribute to Greta G. Fein / Artin Goncu and Elisa L. Klein Part II. Children in play \* Play as improvisational rehearsal: Multiple levels of analysis in children's play / R. Keith Sawyer / 19-38 \* Nonsocial play as a risk factor in social and emotional development / Charissa S. L. Cheah, Larry J. Nelson and Kenneth H. Rubin / 39-71 \* Transforming the "play-oriented curriculum" and work in constructivist early education / Rheta DeVries / 72-106 \* The adult as a tutor in fostering children's symbolic play / Anna Bondioli / 107-131 \* Facilitating the narrative quality of

sociodramatic play / Rivka Glaubman, Gabi Kashi and Rina Koresh / 132-157 Part III. Children in story \* Emotional breaches in play and narrative / Brian Sutton-Smith / 161-176 \* "He was the best daddy": Postdivorce preschoolers' representations of loss and family life / Patricia Herman and Inge Bretherton / 177-203 \* "I'm so glad I'm glad": The role of emotions and close relationships in children's play and narrative language / A. D. Pellegrini and Lee Galda / 204-219 \* Playing "inside" stories / Lois A. Groth and Lynn Dietrich Darling / 220-237 Part IV. Children in school \* Day care and the strange situation / Alison Clarke-Stewart, Virginia Allhusen and Frits Goossens / 241-266 \* Processes in the formation of attachment relationships with alternative caregivers / Carolee Howes and Erin Oldman / 267-287 \* Conceptual gaps in the lifespan theory of attachment / Nathan A. Fox and Yair Bar-Haim / 288-308 \* Talking the talk: Constructivist teachers guiding children's problem solving / Michelle B. Patt and Artin Goncu / 309-332 \* Visions and realities of achieving partnership: Parent-school relationships at the turn of the century / Douglas R. Powell / 333-357 \* Contexts of quality: Implications for U.S. child-care policy / Elisa L. Klein and Louisa B. Tarullo Part V. Conclusions \* Suppose there was a hill in Richmond Hill / Greta G. Fein Index

KW - PsycInfo

KW - Child Care

KW - Childhood Development

KW - Childhood Play Development

KW - Classroom Environment

KW - Storytelling

KW - Childhood Play Behavior

KW - Cognitive Development

KW - Early Experience

KW - Interpersonal Influences

KW - Language Development

KW - Learning

KW - Psychosocial Development

KW - Reading Development

KW - Social Interaction

RP - NOT IN FILE

SP - New

JF - (2001)

VL - Children in play, story, and school. x, 406 pp. New York, NY, US: Guilford Press; US.

N2 - (from the cover) This volume explores what play and story mean to young children, and how these vital aspects of development can best be supported in child care and educational settings. Vital connections are drawn between children's activities, their interpersonal relationships, and their emerging cognitive and affective capacities. Topics covered include promoting social play in the classroom, storytelling and literacy development, and the influences of early caregiving experiences on attachment and learning. Theoretical and methodological issues on those areas of research are addressed, as well as social policy implications. (PsycINFO Database Record (c) 2012 APA, all rights reserved)

AD - Goncu, Artin: U Illinois, Dept of Educational Psychology, Chicago, IL, US

ER -

TY - JOUR

ID - 777

T1 - Identifying sexually abused children in play therapy. [References]

A1 - Homeyer,Linda E.

Y1 - 2001///

N1 - Book: 2001-16195-010

English

Book; Edited Book

KW - PsycInfo

KW - Child Abuse

KW - Play Therapy

KW - Screening Tests

KW - Sexual Abuse

KW - At Risk Populations

KW - Victimization

RP - NOT IN FILE

SP - 131

EP - 154

JF - Landreth, Garry L [Ed]

VL - :

IS - 2001

N2 - (from the chapter) Children who have been (or are being) sexually abused may not be able to communicate that to others. This chapter describes the Play Therapy Screening Instrument for Child Sexual Abuse (PTSI-CSA), which can be used by the play therapist both in an attempt to understand children's play in the playroom as well as to comply with legal and ethical requirement to report abuse. The PTSI-CSA is an empirically researched screening instrument. The 15 items of play therapy behavior that make up the instrument can identify children who are at high risk of being sexually abused. Once a child is identified as high risk, the child can then be referred for a more formal sexual abuse evaluation. The user should be aware of the possible false negative and false positive findings. (PsycINFO Database Record (c) 2012 APA, all rights reserved)

AD - Homeyer, Linda E.: Southwest Texas State U, Dept of Educational Administration & Psychological Services, San Marcos, TX, US

ER -

TY - JOUR

ID - 778

T1 - Language development and symbolic play in children with and without familial risk for dyslexia. [References]

A1 - Lyytinen,Paula; Poikkeus,Anna-Maija; Laakso,Marja-Leena; Eklund,Kenneth; Lyytinen,Heikki

Y1 - 2001///

N1 - Peer Reviewed Journal: 2001-11200-014

English

Journal; Peer Reviewed Journal

KW - PsycInfo

KW - Childhood Play Behavior

KW - Dyslexia

KW - Genetics

KW - Language Delay

KW - Language Development

RP - NOT IN FILE

SP - 873

EP - 885

JF - Journal of Speech, Language, and Hearing Research

VL - 44:

IS - 4

N2 - Examined (a) whether children in families with a history of dyslexia were more likely to show delays in language development and (b) whether a delayed onset of expressive language predicted later language development. The language development of 200 children was analyzed longitudinally at 14, 24, 30, and 42 mo. Symbolic play was assessed at 14 mo. Half of the children were from families with a history of dyslexia (the Dyslexia Risk [DR] group) and others served as controls. Parental reports and structured tests were used to assess children. No differences emerged between the two groups in receptive language, symbolic play, or on the Bayley MDI. The maximum sentence length at 2 yrs and object naming and inflectional morphology skills at 3.5 yrs were higher for controls. Reynell receptive score at 2.5 yrs provided the greatest unique contribution to the prediction of the children's receptive and expressive language. Children's risk status provided a significant contribution to their expressive language at 3.5 yrs. Late talkers in the DR group differed from the others in that group in receptive and expressive language at 3.5 yrs. Children with a familial risk for dyslexia and with a history of late talking are at higher risk for delays in language acquisition. (PsycINFO Database Record (c) 2012 APA, all rights reserved)

SN - 1092-4388

AD - Lyytinen, Paula: U Jyvaskyla, Dept of Psychology, Jyvaskyla, Finland

ER -

TY - JOUR

ID - 779

T1 - Children's play. [References]

A1 - McArdle,Paul

Y1 - 2001///

N1 - Peer Reviewed Journal: 2001-10020-004

English

Journal; Peer Reviewed Journal

KW - PsycInfo

KW - Childhood Play Behavior

KW - Personality Development

KW - Well Being

RP - NOT IN FILE

SP - 509

EP - 514

JF - Child: Care, Health and Development

VL - 27:

IS - 6

N2 - This paper draws upon research from a number of disciplines to examine the significance of children's play. It concludes that play may well be central to normal personality development. However, its place in contemporary Western society is not secure, perhaps risking the development and well-being of urban and disadvantaged children in particular. (PsycINFO Database Record (c) 2012 APA, all rights reserved) (journal abstract)

SN - 0305-1862

AD - McArdle, Paul: Fleming Nuffield Unit, Newcastle upon Tyne, United Kingdom

ER -

TY - JOUR

ID - 780

T1 - Play between aggressive young children and their mothers. [References]

A1 - Landy,Sarah

Y1 - 2001///

N1 - Peer Reviewed Journal: 2001-06061-003

English

Journal; Peer Reviewed Journal

KW - PsycInfo

KW - Aggressive Behavior

KW - Attachment Behavior

KW - Childhood Play Behavior

KW - Conduct Disorder

KW - Mother Child Relations

KW - At Risk Populations

KW - Preschool Students

RP - NOT IN FILE

SP - 223

EP - 240

JF - Clinical Child Psychology and Psychiatry

VL - 6:

IS - 2

N2 - There is a growing number of pre-schoolers presenting to clinics with high levels of aggression. These children are at risk of developing conduct disorder, especially when the symptoms are severe. Treatment for older children with aggressive symptoms has often relied on teaching their parents behavior management techniques and has ignored affective and relationship issues. After presenting observations of the play interactions of aggressive pre-schoolers with their mothers and other relevant research findings, this article explores important aspects of the parent-child interaction and affective relationship. These aspects include the



mother's difficulty in tolerating and modulating the child's negative affect, reluctance to enter the play metaphor and failure to gradually move aggressive play to more pro-social themes. The importance of these interactions and affective relationship aspects and their contribution to the child's difficulty are discussed in light of their implications for treatment. Also, suggestions are made for caregivers working with these children to help them self-regulate and acquire appropriate cognitive strategies to contain the negative affects. (PsycINFO Database Record (c) 2012 APA, all rights reserved)

SN - 1359-1045

AD - Landy, Sarah: U Toronto, Dept of Psychiatry, Toronto, ON, Canada

ER -

TY - JOUR

ID - 781

T1 - Counselors coaching teachers to use play therapy in classrooms: The Play And Language to Succeed (PALS) early, school-based intervention for behaviorally at-risk children. [References]

A1 - Chaloner,W.

Y1 - 2001///

N1 - Book: 2001-01223-020

English

Book; Edited Book

KW - PsycInfo

KW - At Risk Populations

KW - Classroom Environment

KW - Play Therapy

KW - School Based Intervention

KW - Teacher Education

KW - Behavior Problems

KW - Early Intervention

KW - Coaching

RP - NOT IN FILE

SP - 368

EP - 390

JF - Drewes, Athena A [Ed]; Carey, Lois J [Ed]; Schaefer, Charles E [Ed]

VL - :

IS - 2001

N2 - (from the chapter) The incidence and severity of violence in schools has increased significantly over the past 30 yrs. Research indicates that impaired caregiver-child attachment is a primary risk factor for violence. The authors Play And Language to Succeed Model (PALS) trains school counselors, play therapists, and Pre-K-2 teachers to intervene early, using the three key elements of bonding, boundaries, and language to form positive attachments and teach social skills via play and other developmentally appropriate practices. The components that are necessary for successful implementation of PALS are (1) inclusive, classroom-based interventions by teachers; (2) individual and small group play therapy; (3) initial and ongoing districtwide staff development and support, (4) ongoing administrative and staff collaboration regarding program implementation; and (5) early, proactive behavioral screening, rating, and assessment. The case study in this chapter illustrated how potent a collaborative relationship among play therapists, counselors, and teachers can be in facilitating change with severely at-risk children while maximizing service delivery. (PsycINFO Database Record (c) 2012 APA, all rights reserved)

ER -

TY - JOUR

ID - 782

T1 - Play therapy for children of alcoholics. [References]

A1 - Emshoff,James G.

Y1 - 2001///

N1 - Book: 2001-01223-011

English

Book; Edited Book

KW - PsycInfo

KW - Alcoholism

KW - At Risk Populations

KW - Behavior Problems

KW - Parental Characteristics

KW - Play Therapy

KW - Children of Alcoholics

KW - Early Experience

RP - NOT IN FILE

SP - 194

EP - 215

JF - Drewes, Athena A [Ed]; Carey, Lois J [Ed]; Schaefer, Charles E [Ed]

VL - :

IS - 2001

N2 - (from the chapter) Discusses play therapy for children with alcoholic parents. It has been estimated that 26.8 million children of alcoholics (COAs) currently live in the US. Of these, over 11 million are younger than 18. COAs have also been shown to be at an increased risk for a wide range of behavioral and emotional problems, including addiction to alcohol and other drugs, depression, anxiety, school failure, delinquency, and difficulty getting along with their peers. This chapter emphasizes the potential benefits of using play therapy with COAs. Because of the numerous responsibilities that are often associated with living in a substance-abusing household, COAs typically receive fewer opportunities to engage in this fun than do other children. Play therapy allows these children to participate in activities that not only provide them with a relief from the pressures of being a COA, but can also be designed to address many of the risk factors these children experience. (PsycINFO Database Record (c) 2012 APA, all rights reserved)

AD - Emshoff, James G.: Georgia State U, Atlanta, GA, US

ER -

TY - JOUR

ID - 783

T1 - Child-centered play therapy for at-risk elementary school children. [References]

A1 - Post,Phyllis

Y1 - 2001///

N1 - Book: 2001-01223-006

English

Book; Edited Book

KW - PsycInfo

KW - At Risk Populations

KW - Behavior Problems

KW - Client Centered Therapy

KW - Play Therapy

KW - Elementary School Students

RP - NOT IN FILE

SP - 105

EP - 122

JF - Drewes, Athena A [Ed]; Carey, Lois J [Ed]; Schaefer, Charles E [Ed]

VL - :

IS - 2001

N2 - (from the chapter) At-risk elementary school children typically come to school with attention and behavior problems. Because these problems can detract from their academic and social development, cause persistent school misconduct, and affect other children negatively, helping these children become involved and successful in school is essential. Child-centered play therapy is one way to help at-risk children. In this chapter, the following topics are addressed: play therapy with at-risk children, the referral process, goals of child-centered play therapy with at-risk children, and consultations with caregivers and teachers. All of the case illustrations are based on the author's experience conducting child-centered play therapy in schools composed predominantly of at-risk children. (PsycINFO Database Record (c) 2012 APA, all rights reserved)

AD - Post, Phyllis: U North Carolina, Dept of Counseling, Special Education, and Child Development, Charlotte, NC, US

ER -

TY - JOUR

ID - 784

T1 - The role of friendship in psychological adjustment

A1 - Nangle,Douglas W.

Y1 - 2001///

N1 - Book: 2001-00673-000

English

Book; Edited Book

(Created by PsycINFO) (Abbreviated) Editor's notes [by] Douglas W. Nangle, Cynthia A. Erdley \* Children's friendship experiences and psychological adjustment: Theory and research / Cynthia A. Erdley, Douglas W. Nangle, Julie E. Newman, Erika M. Carpenter / 5-24 \* Friendship and peer rejection as predictors of adult adjustment / Catherine L. Bagwell, Michelle E. Schmidt, Andrew F. newcomb, William M. Bukowski / 25-49 \* Children with attention-deficit/hyperactivity disorder: Peer relationships and peer-oriented interventions / Sylvie Mrug, Betsy Hoza, Alyson C. Gerdes / 51-77 \* Peer group dynamics associated with iatrogenic effects in group interventions with high-risk young adolescents / Thomas J. Dishion, Francois Poulin, Bert Burraston / 79-92 \* Friendship and the worlds of childhood / William M. Bukowski / 93-105 Index

KW - PsycInfo

KW - Childhood Development

KW - Emotional Adjustment

KW - Friendship

RP - NOT IN FILE

SP - San

EP - Bass

JF - (2001)

VL - The role of friendship in psychological adjustment. 112 pp. San Francisco, CA, US: Jossey-Bass; US.

N2 - (from the cover) The idea that children's peer relations play a critical role in their overall psychological adjustment is now assumed. As an index of popularity or status in the peer group, however, peer acceptance captures only one aspect of children's peer experiences. Friendships, close dyadic relationships, play a unique and crucial role in children's socioemotional development. The 5 chapters in this volume highlight different avenues of research aimed at deepening our understanding of the complex relationship between children's friendship experiences and psychological adjustment. This volume covers historical and conceptual issues involved in the study of friendship, as well as cutting-edge empirical research linking friendship and a range of outcome indices. (PsycINFO Database Record (c) 2012 APA, all rights reserved)

AD - Nangle, Douglas W.: U Maine, ME, US

ER -

TY - JOUR

ID - 785

T1 - Gender biases in children's appraisals of injury risk and other children's risk-taking behaviors. [References]

A1 - Morrongiello,Barbara A.

Y1 - 2000///

N1 - Peer Reviewed Journal: 2001-14627-004

English

Journal; Peer Reviewed Journal

KW - PsycInfo

KW - Child Attitudes

KW - Childhood Play Behavior

KW - Human Sex Differences

KW - Risk Perception

KW - Injuries

RP - NOT IN FILE

SP - 317

EP - 336

JF - Journal of Experimental Child Psychology

JA - J Exp. Child Psychol.

VL - 77:

IS - 4

N2 - Children ages 6, 8, and 10 yrs old were given tasks designed to assess their beliefs about risk of injury from activities. Children were asked to appraise the risk of injury for boys and girls engaging in various play behaviors and to judge the sex of the character in stories about children engaging in activities that result in injuries. Results revealed gender biases in children's appraisals of injury risk: Both boys and girls rated boys as having a lower likelihood of injury than girls even though the boys and girls were engaging in the exact same activities. Children also showed higher accuracy in identifying the sex of the character in stories of boys' injuries than girls' injuries, and accuracy improved with the participant's age. Overall, the results indicate that by the age of 6 yrs, children already have differential beliefs about injury vulnerability for boys and girls. Although boys routinely experience more injuries than girls, children rate girls as having a greater risk of injury than boys. With increasing age, school-age children develop a greater awareness of the ways in which boys and girls differ in risk-taking activities that lead to injury outcomes. (PsycINFO Database Record (c) 2012 APA, all rights reserved) (journal abstract)

SN - 0022-0965

AD - Morrongiello, Barbara A.: U Guelph, Psychology Dept, Guelph, ON, Canada

ER -

TY - JOUR

ID - 786

T1 - The effects of multiple risk factors including prenatal cocaine exposure on exploratory and symbolic play

A1 - Lundgren Kristine, Hong Tu

Y1 - 2000///

N1 - Dissertation Abstract: 2000-95018-337

English

Dissertation Abstract

KW - PsycInfo

KW - Childhood Play Behavior

KW - Childhood Play Development

KW - Cocaine

KW - Prenatal Exposure

KW - Risk Factors

KW - Exploratory Behavior

KW - Role Playing

RP - NOT IN FILE

SP - 1368

JF - Dissertation Abstracts International: Section B: The Sciences and Engineering

VL - 61:

IS - 3-B

N2 - According to the national estimates of women across socioeconomic groups, cocaine use during pregnancy affects between 10 and 20% of all children (Chasnoff, Landress & Barrett, 1990). With the growing number of children exposed to cocaine there has been a number of research studies focused on the potential developmental risks from prenatal cocaine-exposure. The results of these studies have been inconsistent and inconclusive due in part to the number of methodological difficulties encountered when investigating this population. There remains many unanswered questions regarding the overall development of children with prenatal cocaine-exposure. The purpose of this study was to provide descriptive information regarding early play development in a group of children with prenatal cocaine-exposure and associated risk factors. Their performance will be compared to an age matched control group from the same community with no history of drug exposure. The play assessment was based on a 20-minute sample of free play. The results suggest differences between the two groups as well as differences with the cocaine-exposed group. The major differences between the two groups were in the maturity of the play and the initiation of the play activities. The contribution of the multiple risk factors in the cocaine-exposed group will be discussed in relation to these

results. The findings from this study suggest that play development may be disrupted in children with cocaine-exposure and associated risk factors. (PsycINFO Database Record (c) 2012 APA, all rights reserved)

SN - 0419-4217

AD - Lundgren Kristine, Hong-Tu: Boston U., US

ER -

TY - JOUR

ID - 787

T1 - Perspective taking and adjustment in preschoolers

A1 - Pears, Katherine Chaffee

Y1 - 2000///

N1 - Dissertation Abstract: 2000-95004-152

English

Dissertation Abstract

KW - PsycInfo

KW - Adjustment

KW - Age Differences

KW - Aggressive Behavior

KW - Psychosocial Development

KW - Role Taking

KW - Childhood Development

KW - Social Skills

RP - NOT IN FILE

SP - 4244

JF - Dissertation Abstracts International: Section B: The Sciences and Engineering

VL - 60:

IS - 8-B

N2 - A number of theories attempt to explain social aggression in children. However, none of these theories satisfactorily accounts for both the development of social aggression and its maintenance across time and situations. In this dissertation, a theory positing perspective-taking as a within-child mechanism accounting for the continuity of social aggression is proposed. The theory predicts that perspective-taking (as indexed by social referencing, symbolic play, and other more traditional perspective-taking measures) should be related to social competence, particularly social aggression. The theory was tested in samples of children at risk for the development of problem behaviors and those not at-risk at three different ages: 21 months, 36 months, and 48 months. Social referencing was measured at 21 months, perceptual, motivational, cognitive and affective perspective-taking at 36 and 48 months, and symbolic play at 48 months. To assess children's social competence, and their social aggression in particular, parents and teachers rated children's externalizing, internalizing, and social behaviors at 48 months. Children's observed positive and aggressive behaviors with peers also were coded. Differences between risk groups were found on perspective-taking at 36 and 48 months but not on social referencing, symbolic play, or social competence. When longitudinal relations were examined, social referencing at 21 months predicted perspective-taking at 36 months and observed positive and aggressive behaviors at 48 months. Perspective-taking at 36 months predicted perspective-taking at 48 months but did not relate to symbolic play or social competence. However, perspective-taking at 48 months did predict symbolic play and some aspects of social competence at that same age. In particular, perspective-taking was related to social problems and internalizing behaviors, but not to externalizing behaviors. Finally, symbolic play was also correlated with social competence at 48 months, but again, the correlations were with social problems and internalizing rather than externalizing behaviors. Overall, the theory that perspective-taking is central to the continuity of social aggression received only mixed support. The implications of the findings for intervention in and prevention of social aggression are discussed. (PsycINFO Database Record (c) 2012 APA, all rights reserved)

SN - 0419-4217

AD - Pears, Katherine Chaffee: U Oregon, US

ER -

TY - JOUR

ID - 789

T1 - Just pretend: Participation in symbolic talk by children with histories of early corrective heart surgery

A1 - Ovadia,Rebecca; Hemphill,Lowry; Winner,Kendra; Bellinger,David

Y1 - 2000///

N1 - Peer Reviewed Journal: 2000-12247-002

English

Journal; Peer Reviewed Journal

KW - PsycInfo

KW - Childhood Play Behavior

KW - Heart Disorders

KW - Language Development

KW - Morphology (Language)

KW - Side Effects (Treatment)

KW - At Risk Populations

KW - Discourse Analysis

KW - Heart Surgery

KW - Language Delay

KW - Parent Child Relations

KW - Pretend Play

KW - Social Skills

KW - Syntax

KW - Vocabulary

RP - NOT IN FILE

SP - 321

EP - 340

JF - Applied Psycholinguistics

VL - 21:

IS - 3

N2 - Children with histories of early corrective heart surgery (ECHS) are at risk for language, cognitive, and motor delays. This study examined parent-child play in 30 children with ECHS (aged 4-5 yrs) and 30 typically developing children. Children were compared on basic language measures and on proportions of symbolic and nonsymbolic talk. Children with ECHS focused on concrete "here-and-now" talk and produced less symbolic talk than normative children. Only a third of the children with ECHS were able to produce story episodes. These findings reflect the ECHS children's relatively immature participation in joint pretense and their overreliance on earlier acquired strategies for pretend play. This style of participation may result from difficulty coordinating more complex social intentions with appropriate language forms. (PsycINFO Database Record (c) 2012 APA, all rights reserved)

SN - 0142-7164

AD - Ovadia, Rebecca: Harvard Graduate School of Education, Cambridge, MA, US

ER -

TY - JOUR

ID - 793

T1 - Parental influences on toddlers' injury-risk behaviors: Are sons and daughters socialized differently?

A1 - Morrongiello,Barbara A.

Y1 - 1999///

N1 - Peer Reviewed Journal: 2001-17644-002

English

Journal; Peer Reviewed Journal

KW - PsycInfo

KW - Childrearing Practices

KW - Human Sex Differences

KW - Parent Child Relations

KW - Risk Taking

KW - SOCIALIZATION

KW - Childhood Play Behavior

KW - Sex Roles

RP - NOT IN FILE

SP - 227

EP - 251

JF - Journal of Applied Developmental Psychology

VL - 20:

IS - 2

N2 - Examined mothers' and fathers' communications to sons and daughters (ages 2-4) in 48 families during both a free-play episode and their teaching the child a playground behavior (going down a firehouse-type pole) that posed some threat to safety because of the child's developmental status. The results revealed that mothers and fathers responded similarly to each other, but differently to sons and daughters. Coding of verbalizations revealed that sons received more directives, fewer explanations, and more questions communicating information about how to perform the pole task than daughters. Coding of physical contact revealed that parents applied more pressure to sons than daughters to attempt the pole task without physical assistance and provided more spontaneous physical assistance to daughters than sons, although there were no sex differences in children's playground skills or their abilities to complete the task independently. Coding of the free-play episode yielded results consistent with those from the teaching session. The results suggest that parents communicate to young children in ways that may promote greater risk taking by boys and greater perceived injury vulnerability among girls. (PsycINFO Database Record (c) 2012 APA, all rights reserved)

SN - 0193-3973

AD - Morrongiello, Barbara A.: U Guelph, Dept of Psychology, Guelph, ON, Canada

ER -

TY - JOUR

ID - 794

T1 - Impact of child-centered play therapy on the self-esteem, locus of control, and anxiety of at-risk 4th, 5th, and 6th grade students. [References]

A1 - Post,Phyllis

Y1 - 1999///

N1 - Peer Reviewed Journal: 2000-13732-001

English

Journal; Peer Reviewed Journal

KW - PsycInfo

KW - Anxiety

KW - At Risk Populations

KW - Internal External Locus of Control

KW - Play Therapy

KW - Self Esteem

KW - Academic Self Concept

RP - NOT IN FILE

SP - 1

EP - 18

JF - International Journal of Play Therapy

VL - 8:

IS - 2

N2 - Addresses the impact of child-centered play therapy on the self-esteem, locus of control, and anxiety level of at-risk 4th, 5th, and 6th grade children. The two groups of students, those who participated in play therapy and those who did not participate in play therapy, were administered the Coopersmith Self-Esteem Inventory, Intellectual Achievement Responsibility Scale-Revised, and State-Trait Anxiety Inventory for Children. While the results indicate that children participating in play therapy did not change, the students not participating in play therapy demonstrated a decrease in both self-esteem and locus of control over the course of the school year. These findings indicate that an intervention, such as play therapy, may be needed to prevent at-risk children from developing lower self esteem and from reducing their sense of responsibility for their academic successes and failures. (PsycINFO Database Record (c) 2012 APA, all rights reserved)

SN - 1555-6824

AD - Post, Phyllis: U North Carolina, Dept of Counseling, Special Education, & Child Development, Charlotte, NC, US

ER -

TY - JOUR

ID - 795

T1 - The delayed emergence of lexical morphology in preterm children: The case of verbs. [References]

A1 - Le Normand,Marie-Therese; Cohen, Henri

Y1 - 1999///

N1 - Peer Reviewed Journal: 2000-13141-005

English

Journal; Peer Reviewed Journal

KW - PsycInfo

KW - Language Delay

KW - Language Development

KW - Premature Birth

KW - Sociocultural Factors

KW - Verbs

KW - Age Differences

KW - At Risk Populations

KW - Lexical Access

KW - Morphology (Language)

RP - NOT IN FILE

SP - 235

EP - 246

JF - Journal of Neurolinguistics

VL - 12:

IS - 3-4

N2 - A linguistic analysis in low-risk preterm (PT) children was conducted to determine whether the acquisition of complex aspects of the lexicon, such as verbs, is influenced by their premature birth status and whether sociocultural factors play a modulating role in this aspect of cognitive development. 51 PT children, distributed in 3 birthweight groups-extremely low (780-1200 g), very low (1201-1500 g) and low (1501-2210 g)-were evaluated at 42 mo and 60 mo of age to assess their production of main, auxiliary, and non-finite verb types and tokens relative to that of 2 control groups of full-term children matched for age and socioeconomic level. The children's verb lexicon was collected during a 20-min controlled play context. Analyses of transcript data revealed first that the effect of sociocultural variables was independent of birth status or age. Further analyses revealed significant differences, indicating a marked increase in both verb type and token usage in the control children, whereas verb production in the 3 groups of PT children remained generally poorer. The data suggest that impaired language development is a cognitive consequence of prematurity independent of birthweight. (PsycINFO Database Record (c) 2012 APA, all rights reserved)

SN - 0911-6044

AD - Le Normand, Marie-Therese: Hopital de la Salpetriere, Neuropsychologie Clinique de l'Enfant, Batiment Pharmacie, Paris, France

ER -

TY - JOUR

ID - 796

T1 - Increasing the social-communicative skills of at-risk preschool age children in a play context.(language, intervention, head start)

A1 - Craig-Unkefer, Leslie Ann

Y1 - 1999///

N1 - Dissertation Abstract: 1999-95021-043

English

Dissertation Abstract

KW - PsycInfo

KW - At Risk Populations

KW - Childhood Play Behavior

KW - Language Delay



KW - Social Skills Training

KW - Verbal Communication

KW - Child Psychology

KW - Dyads

RP - NOT IN FILE

SP - 1445

JF - Dissertation Abstracts International Section A: Humanities and Social Sciences

VL - 60:

IS - 5-A

N2 - The purpose of the current study was to assess the effects of a social communication intervention on the peer interactions of preschool age children at-risk for delays in language and social skills. A multiple baseline design was used to determine the effects of an intervention on children's verbal interactions and play across three mixed gender dyads. The intervention was systematically and sequentially introduced to each dyad after baseline data were collected in order to demonstrate experimental control. During the baseline and intervention phases, children's social communicative behaviors were observed, recorded, and summarized. The observational data were used as the primary measure of behavioral change for the dyads; measures of language and play complexity were also observed. Generalization measures of language and play with untrained peers in another setting were assessed. Social validity was determined by comparison of baseline and intervention sessions of the participants. Results indicated an increase in use of social communicative behaviors for all of the participants and an increase in complex and interactive play. The results of the pre to post-intervention generalization measurement indicated that the participants increased in their use of social communicative behaviors to an untrained peer in another setting. There were also increases in complex and interactive play by the participants. (PsycINFO Database Record (c) 2012 APA, all rights reserved)

SN - 0419-4209

AD - Craig-Unkefer, Leslie Ann: Peabody Coll For Teachers Of Vanderbilt U., US

ER -

TY - JOUR

ID - 797

T1 - Empirical relationships between developmental competencies and peer play behaviors with African-American Head Start children

A1 - Mendez,Julia Laraine

Y1 - 1999///

N1 - Dissertation Abstract: 1999-95020-196

English

Dissertation Abstract

KW - PsycInfo

KW - Childhood Play Behavior

KW - Language Development

KW - Personality

KW - Self Management

KW - Social Skills

KW - Age Differences

KW - Blacks

KW - Childhood Development

KW - Human Sex Differences

KW - Project Head Start

RP - NOT IN FILE

SP - 1888

JF - Dissertation Abstracts International: Section B: The Sciences and Engineering

VL - 60:

IS - 4-B

N2 - School adaptation is an important national priority, particularly for children from low-income and minority backgrounds. Informing school readiness initiatives requires a detailed understanding of social competence among children at-risk for school difficulties. This study used a developmental theoretical framework and multivariate research methods to examine emerging capacities related to successful or

unsuccessful peer play interactions for African American children within their classroom setting. Social competence was investigated with 141 urban Head Start children by (a) determining the unique variance associated with each child capacity in the areas of temperament, language, and self regulation, (b) determining multivariate relationships between child capacities and peer play, and (c) exploring age and gender variability within peer play, temperament, language, and self regulation. Factor analysis showed seven out of eight child capacities could be distinctively measured, as indicated by adequate specific variance for each variable. Canonical analyses revealed two significant canonical variates, named Interactive Competence and Overactive-Disruption. The Competence variate was comprised of strong positive loadings for Play Interaction, Adaptability, Approach, and Receptive Language, and negative loadings for Activity Level and Play Disconnection. The Overactive-Disruption variate was comprised of strong positive loadings for Play Disruption and Activity Level. Repeated measures ANOVA showed an Age x Gender x Play effect, with older females receiving higher scores than younger males on the Play Interaction factor, and younger males scoring higher than older males and younger females on Play Disconnection. No significant differences were found for Play Disruption. An Age x Temperament effect revealed that younger children received higher scores for Activity than older children. Conversely, older children received higher scores for Approach than younger children. No significant age differences were found for Adaptability. A second interaction, Gender x Temperament, showed males scored higher than females on the Activity factor. No significant gender differences were found for the Adaptability or Approach factors. No significant interactions were found for language or self regulation. Implications for future research and promoting interactive peer play in the classroom were discussed. This study also informs developmentally appropriate curriculum, mental health policy, and early childhood intervention among poor preschool children. (PsycINFO Database Record (c) 2012 APA, all rights reserved)

SN - 0419-4217

AD - Mendez, Julia Laraine: U Pennsylvania, US

ER -

TY - JOUR

ID - 798

T1 - Prevention of violent behaviors through attachment via a play therapy and Montessori program

A1 - Nearing, Graciela Batista

Y1 - 1999///

N1 - Dissertation Abstract: 1999-95018-278

English

Dissertation Abstract

KW - PsycInfo

KW - Attachment Behavior

KW - Montessori Method

KW - Play Therapy

KW - Prevention

KW - Violence

RP - NOT IN FILE

SP - 1331

JF - Dissertation Abstracts International: Section B: The Sciences and Engineering

VL - 60:

IS - 3-B

N2 - A primary intervention program for preschoolers is designed with the objective of preventing the emergence of violent behaviors. By developing attachment to a play therapist and participating in a Montessori preschool program, the child at risk is helped to shape adaptive behaviors. The child born to low socio-economic and harsh family conditions is in peril of becoming aggressive, and in danger of developing pathological behaviors or behavior disorders. By designing a program that targets the ages when the child begins to make social contacts outside the home the possibility of influencing normal social skill is enhanced. This intensive program will take place for ages 3-6, during three consecutive scholastic calendar years in addition to fostering development of self-control and other positive social behaviors, the child is expected to be cognitively ready for formal school learning at the end of the intervention program. (PsycINFO Database Record (c) 2012 APA, all rights reserved)

SN - 0419-4217

AD - Nearing, Graciela Batista: Miami Inst. of Psychology of the Caribbean Ctr. For Advanced Studies, US  
ER -

TY - JOUR

ID - 800

T1 - Play therapy for children exposed to violence: Individual, family, and community interventions.

[References]

A1 - VanFleet,Rise; Lilly,John Paul; Kaduson,Heidi

Y1 - 1999///

N1 - Peer Reviewed Journal: 1999-11842-002

English

Journal; Peer Reviewed Journal

KW - PsycInfo

KW - At Risk Populations

KW - Play Therapy

KW - Violence

KW - Community Services

KW - Family Therapy

KW - Posttraumatic Stress Disorder

RP - NOT IN FILE

SP - 27

EP - 42

JF - International Journal of Play Therapy

VL - 8:

IS - 1

N2 - Outlines play therapy-related interventions that have been used to assist children who have been exposed to violence and are at risk for developing posttraumatic stress disorder (PTSD). Play therapy approaches for children exposed to violence, family play therapy for families affected by violent trauma, and a description of a community intervention that works with play therapists to ensure that children and families are empowered and supported following violence and abuse are included. (PsycINFO Database Record (c) 2012 APA, all rights reserved) (journal abstract)

SN - 1555-6824

AD - VanFleet, Rise: Family Enhancement & Play Therapy Ctr, Boiling Springs, PA, US

ER -

TY - JOUR

ID - 801

T1 - Let's talk and play: A study of poverty mothers and toddler daughters

A1 - Hess,Lucille J.

Y1 - 1999///

N1 - Peer Reviewed Journal: 1999-10710-001

English

Journal; Peer Reviewed Journal

KW - PsycInfo

KW - At Risk Populations

KW - Childhood Play Development

KW - Early Intervention

KW - Language Development

KW - Mother Child Communication

KW - Daughters

KW - Mothers

RP - NOT IN FILE

SP - 1

EP - 16

JF - Infant-Toddler Intervention

VL - 9:

IS - 1

N2 - Investigated whether early intervention initiated 0-3 mo after birth by family service workers result in facilitative play interaction for at-risk families and whether the toddlers of these families acquire early language within normal developmental expectations. The play behavior and language of 3 single mothers and their 12-18 mo old daughters from an intervention program serving an at-risk infant population was assessed. The analysis of the play and oral language came from 4 30-min verbatim transcripts of in-home videotaped sessions as each parent talked and played with her child. Mean length of utterance and the proportion of the mother's total utterances for physical, social, and symbolic play and reading were scored. The utterances used to engage the child in play and provide positive and negative comments in each session assessed the quality of the interaction. Results show that the mothers engaged in more physical play, used a directive interaction style, and needed a high number of bids to keep their child's attention. The quality of talk and play improved when the mothers engaged in symbolic play and used pictures in books to talk to their children. Strategies to teach at-risk families are presented. (PsycINFO Database Record (c) 2012 APA, all rights reserved)

SN - 1053-5586

AD - Hess, Lucille J.: Indiana U Purdue U, Audiology &amp; Speech Sciences, Ft Wayne, IN, US

ER -

TY - JOUR

ID - 802

T1 - Fear and exhilaration in response to risk: An extension of a model of injury risk in a real-world context

A1 - Cook,Scott; Peterson,Lizette; DiLillo,David

Y1 - 1999///

N1 - Peer Reviewed Journal: 1999-10598-001

English

Journal; Peer Reviewed Journal

KW - PsycInfo

KW - Childhood Play Behavior

KW - Emotional Responses

KW - Euphoria

KW - Fear

KW - Risk Taking

RP - NOT IN FILE

SP - 5

EP - 15

JF - Behavior Therapy

VL - 30:

IS - 1

N2 - Tested a model that predicts children's actual injury risk behavior from their current typical reported reactions of excitement vs fear in risky play situations. 130 4th graders were asked to report on their current typical levels of fear and excitement in response to common play situations, including those involving play in the water. A week or more later, the same children were observed during their turn at free play on the diving board of a local swimming pool. Reporting that current responses to risky play situations resulted in fear was related to lower rates of actual risky behavior and higher rates of protective behavior, whereas reporting current responses of exhilaration to risky situations was related to higher rates of some kinds of actual risky behavior. These relationships were even stronger when only water-related play situations were considered. The data are consistent with findings from observed behavior where the risk was academic, social, or sports-related failure rather than injury. This study documents that children's perceptions of their own current cognitive reactions to risky play situations predict their actual concurrent risky behavior in a potential physical injury situation. Thus, these findings have utility for injury prevention programs. (PsycINFO Database Record (c) 2012 APA, all rights reserved)

SN - 0005-7894

AD - Cook, Scott: U Missouri, Columbia, MO, US

ER -

TY - JOUR

ID - 803

T1 - Externalizing problems in two-year-olds: Implications for patterns of social behavior and peers' responses to aggression

A1 - Calkins,Susan D.

Y1 - 1999///

N1 - Peer Reviewed Journal: 1999-05699-002

English

Journal; Peer Reviewed Journal

KW - PsycInfo

KW - Aggressive Behavior

KW - At Risk Populations

KW - Behavior Problems

KW - Dyads

KW - Externalization

RP - NOT IN FILE

SP - 267

EP - 288

JF - Early Education and Development

VL - 10:

IS - 3

N2 - 48 2-yr-old children selected on the basis of parents' responses to 2 administrations of the Child Behavior Checklist for 2-3 yr olds was observed in peer interactions. 24 of these Ss displayed symptoms of aggressive/destructive (externalizing) problems that were in the borderline clinical range (labeled "high risk") and 24 Ss showed few such symptoms ("low risk"). The Ss were observed in matched dyads (1 high risk and 1 low risk child) across 4 tasks designed to vary in the degree of social participation they would elicit. Across all tasks, Ss in the high risk group displayed significantly and consistently more aggressive behavior than the Ss in the low risk group. High risk Ss did not differ from other Ss in terms of several indices of social and nonsocial play. When classified as high aggressive vs average vs low aggressive on the basis of laboratory behavior, Ss who displayed high amounts of aggression during the play sessions did not differ from less aggressive Ss on these indices of social play. The responses of non-aggressive dyad partners to aggressive acts indicated that Ss are responsive to aggression. Results are discussed in terms of the implications of early problematic behavior for later indices of maladjustment that include social competence and peer rejection. (PsycINFO Database Record (c) 2012 APA, all rights reserved)

SN - 1040-9289

AD - Calkins, Susan D.: U North Carolina, Dept of Psychology, Greensboro, NC, US

ER -

TY - JOUR

ID - 804

T1 - Early childhood assessment: A comparison of the Bayley Scales of Infant Development and play-based assessment in two-year old at-risk children

A1 - Kelly-Vance,Lisa; Needelman,Howard; Troia,Kim; Ryalls,Brigette Oliver

Y1 - 1999///

N1 - Peer Reviewed Journal: 1999-05622-001

English

Journal; Peer Reviewed Journal

KW - PsycInfo

KW - At Risk Populations

KW - Bayley Scales of Infant Development

KW - Childhood Play Behavior

KW - Cognitive Assessment

KW - Cognitive Development

RP - NOT IN FILE

SP - 1

EP - 15

JF - Developmental Disabilities Bulletin

VL - 27:

IS - 1

N2 - Practitioners are using a variety of assessment tools to measure cognitive functioning in young children. These measures are used for similar purposes yet the relationship among them is largely unknown. The purpose of this study was to analyze the relationship between two assessment approaches used to determine the cognitive functioning level in young children: the Bayley Scales of Infant Development-II and Play-Based Assessment. A sample of 38 2-yr-olds participating in a Neonatal Intensive Care Unit Follow-Up Clinic were evaluated on both measures. Results indicated a high correlation between the 2 techniques. A comparison of the 2 techniques is provided as well as recommendations as to when each might be used most effectively in early childhood assessment. (PsycINFO Database Record (c) 2012 APA, all rights reserved)

SN - 1184-0412

AD - Kelly-Vance, Lisa: U Nebraska, Psychology Dept, Omaha, NE, US

ER -

TY - JOUR

ID - 805

T1 - Persistent and chronic neglect in the context of poverty-When parents can't parent: Case of Ricky, age 3

A1 - Tonning,Louise M.

Y1 - 1999///

N1 - Book: 1999-04039-009

English

Book; Edited Book

KW - PsycInfo

KW - Child Abuse

KW - Child Neglect

KW - Play Therapy

KW - Poverty

KW - Violence

RP - NOT IN FILE

SP - 203

EP - 224

JF - Webb, Nancy Boyd [Ed]

VL - :

IS - 1999

N2 - (from the chapter) This chapter reports the case of a 3-yr-old African-American male born into chronic poverty who suffered abuse and neglect from birth, who witnessed the violent beatings of his half-brother, and whose mother was addicted to crack cocaine. Placed with his grandmother at 20 mo of age, he responded to the inconsistency of his attachment figures with resistance to contact. Treatment required the creation of a safe environment in which he could use play to work through his reactions to the violence he had witnessed and risk engaging in a new relationship, thereby developing a more versatile self. The modality used was child-centered play therapy. (PsycINFO Database Record (c) 2012 APA, all rights reserved)

AD - Tonning, Louise M.: Private Practice, Greenwich, CT, US

ER -

TY - JOUR

ID - 806

T1 - Why supportive relationships are essential

A1 - Pianta,Robert C.

Y1 - 1999///

N1 - Book: 1999-02145-001

English

Book; Authored Book

KW - PsycInfo

KW - Academic Achievement

KW - Childhood Development

KW - Classroom Environment

KW - Teacher Student Interaction

KW - At Risk Populations

KW - Psychosocial Development

KW - Risk Factors

KW - School Psychologists

RP - NOT IN FILE

SP - 7

EP - 23

JF - Pianta, Robert C

VL - :

IS - 1999

N2 - (from the book) Chapter 1 presents a conceptualization of the role that relationships can play for children, particularly for children who have the kinds of background experiences that tend to predict difficulty in school. For many children, relationships with adults are impoverished or conflictual and, in these cases, are a source of risk. Relationships with teachers are an essential part of classroom experience for all children and a potential resource for improving developmental outcomes. The concept of risk as a social process and the way in which a focus on child-teacher relationships can be used to reduce risk are introduced, as is the notion that the practice of psychology with children is closely tied to the management of contexts that provide resources for development. Schools are viewed as a central context in this respect. Psychologists working in school settings can play a major role in harnessing this potential resource for development. (PsycINFO Database Record (c) 2012 APA, all rights reserved)

AD - Pianta, Robert C.: U Virginia, Curry School of Education, Programs in Clinical & School Psychology, VA, US

ER -

TY - JOUR

ID - 807

T1 - The effects of modeling and experience on young children's persistence at a gambling game

A1 - Tremblay, George C.

Y1 - 1998///

N1 - Peer Reviewed Journal: 1999-05959-005

English

Journal; Peer Reviewed Journal

KW - PsycInfo

KW - Experience Level

KW - Gambling

KW - Observational Learning

KW - Persistence

RP - NOT IN FILE

SP - 193

EP - 210

JF - Journal of Gambling Studies

VL - 14:

IS - 2

N2 - Gambling is common among children and adolescents, but little is known about factors initiating or maintaining this behavior. 51 male and 51 female kindergarten and first grade children were invited to play a game involving repeated opportunities to select colored chips from a cup while blindfolded. Children playing for tangible incentives elected to play longer than those who were not. Seeing a videotaped model win or fail to win a large prize had no effect on persistence with the game. Playing again 1 wk later, children playing for incentives exhibited a more successful strategy, quitting sooner and with more winnings. The parameters of experiential vs observational learning are discussed, with implications for educating children about risk-taking. (PsycINFO Database Record (c) 2012 APA, all rights reserved) (journal abstract)

SN - 1050-5350

AD - Tremblay, George C.: U Missouri, Dept of Psychology, Columbia, MO, US

ER -

TY - JOUR

ID - 808

T1 - The effect of maternal depression in relation to dimensions of parenting in low income mothers

A1 - Albright, Martina Brandegee

Y1 - 1998///

N1 - Dissertation Abstract: 1998-95020-352

English

Dissertation Abstract

KW - PsycInfo

KW - Depression (Emotion)

KW - Lower Income Level

KW - Mother Child Relations

KW - Mothers

KW - Childhood Development

RP - NOT IN FILE

SP - 1909

JF - Dissertation Abstracts International: Section B: The Sciences and Engineering

VL - 59:

IS - 4-B

N2 - This study investigated the relationship between maternal depression and parenting dimensions in children's home environments in a sample of 53 poor White, African American and Latina mothers and their toddlers, 18-24 months of age. Mothers were divided into two groups, depressed and nondepressed using the CES-D depression inventory. Three aspects of the home environment that have been deemed important to children's cognitive and social development were the dependent measures: (1) Provision of Age Appropriate Play Materials, (2) Organization of the Home Environment, and (3) Quality of Mother-Child Interaction. The impact of certain risk factors, socioeconomic status, maternal IQ, and spouse support on these three dimensions were also considered. Findings indicated that maternal depression is the most significant predictor of poor quality mother-child interaction while provision of play materials and organization of the home environment were found to be uninfluenced by depression. Depressed mothers were less sensitive, less engaged, more rigid, and less affectively warm than nondepressed mothers. Children of depressed mothers were less compliant, less affectively positive, less engaged and less gentle than children of nondepressed mothers. For depressed mothers and their children the quality of the mother-child interaction showed less mutual communication, less reciprocity, and less enjoyment than dyads with a nondepressed mother. The other three risk factors: socioeconomic status, maternal IQ and spouse support did not relate to any of the dimensions of the home environment except that more risk was detrimental to the quality of the mother-child interaction, given that one of the risks was depression. This study supports previous findings that maternal depression is a powerful predictor of problematic mother-child interaction, and that other dimensions of the home environment and specific risk factors were found to be unrelated to the mother-child interaction. Interventions targeted at maternal psychological well-being would create a more optimal mother-child interaction which would in turn enhance children's cognitive, social and emotional development. (PsycINFO Database Record (c) 2012 APA, all rights reserved)

SN - 0419-4217

AD - Albright, Martina Brandegee: New York U, US

ER -

TY - JOUR

ID - 809

T1 - Extracorporeal membrane oxygenation versus conventional treatment: Neurodevelopmental and social outcomes at 24 months

A1 - Landry, Susan H.

Y1 - 1998///

N1 - Peer Reviewed Journal: 1998-12900-004

English

Journal; Peer Reviewed Journal

KW - PsycInfo

KW - Artificial Respiration

KW - Childhood Development



KW - Neurology

KW - Respiratory Distress

KW - Social Skills

RP - NOT IN FILE

SP - 118

EP - 130

JF - Child Neuropsychology

VL - 4:

IS - 2

N2 - Compared the neurodevelopmental and social outcomes at 2 years of age for 25 children treated with extracorporeal membrane oxygenation (ECMO) to those of 16 children with severe respiratory illness treated with conventionally and to 29 matched, healthy full-term (FT) children. Mothers' parenting attitudes and children's mental, motor, language, exploratory play, and social competence skills were assessed. A retrospective chart review was also undertaken to further describe the groups with respect to the results of neuroimaging, audiologic, and neuromotor examinations. The FT group had significantly higher mental, motor, and language scores as compared to the ECMO and conventional groups. Groups did not differ on measures of behavior, social competence, exploratory play skills, or parental attitudes. Specifically for the ECMO group, there was a trend toward language being more problematic than other areas of development. In general, the data demonstrate that severe respiratory complications, regardless of type of treatment, place children at increased risk for neurodevelopmental difficulties. (PsycINFO Database Record (c) 2012 APA, all rights reserved)

SN - 0929-7049

AD - Landry, Susan H.: U Texas Medical School, Dept of Pediatrics, Houston, TX, US

ER -

TY - JOUR

ID - 810

T1 - The association of childhood play and adolescent-parent interactions with German adolescent leisure participation

A1 - Meschke, Laurie L.

Y1 - 1998///

N1 - Peer Reviewed Journal: 1998-12489-005

English

Journal; Peer Reviewed Journal

KW - PsycInfo

KW - Behavior

KW - Childhood Play Behavior

KW - Cross Cultural Differences

KW - Parent Child Relations

KW - Recreation

KW - Human Sex Differences

KW - Leisure Time

KW - Psychosexual Behavior

KW - Risk Taking

KW - Social Behavior

RP - NOT IN FILE

SP - 458

EP - 486

JF - Journal of Adolescent Research

VL - 13:

IS - 4

N2 - Macrosystem (nation and gender) and microsystem (childhood play and adolescent-parent interactions) correlates of adolescent leisure activities (risky, social-romantic, and creative-introspective) were investigated by means of questionnaires. The respondents included 221 adolescents from the former East Germany and 443 from West Germany aged 15-18 yrs. The leisure activities were each significantly related to both macro- and microsystem measures. Higher levels of risky leisure were related to West Germany residency, higher levels of childhood competitive play and creative activities, and lower levels of monitoring. Higher participation in

social-romantic leisure was related to being female and reporting higher levels of childhood competitive play. Higher levels of creative-introspective leisure were associated with being female, and reporting lower levels of childhood competitive play, higher childhood participation in cultural education and creative activities, and higher levels of shared interests with parents. Some topics for further research in the area of adolescent leisure are provided. (PsycINFO Database Record (c) 2012 APA, all rights reserved)

SN - 0743-5584

AD - Meschke, Laurie L.: Ohio State U, Human Development & Family Science, Columbus, OH, US

ER -

TY - JOUR

ID - 811

T1 - Cognitive-behavioral treatment of depression, Part IX: Confronting predisposing factors

A1 - Overholser, James C.

Y1 - 1998///

N1 - Peer Reviewed Journal: 1998-12383-004

English

Journal; Peer Reviewed Journal

KW - PsycInfo

KW - At Risk Populations

KW - Cognitive Therapy

KW - Major Depression

KW - Predisposition

KW - Biological Markers

KW - Psychosocial Factors

KW - Sociocultural Factors

RP - NOT IN FILE

SP - 289

EP - 305

JF - Journal of Contemporary Psychotherapy

VL - 28:

IS - 3

N2 - This article discusses the biological, psychological, and social/cultural factors that may predispose a person toward depressive episodes, and the implications for cognitive-behavioral treatment of depression. In order to address possible biological predispositions, it is important to assess for a positive family history of depression, evaluate family members' response to previous treatments, and refer for medications when needed. In order to address possible psychological predispositions, it is useful to evaluate long-standing personality styles, identify negative events from childhood, examine the client's relationship with his or her parents, evaluate the history of abuse, and identify early loss experiences. Cultural factors may play an influential role in the etiology of depression, and can be useful to incorporate into a broad treatment plan. However, cultural factors are difficult to modify through individual psychotherapy. Hence, the author states that they are unlikely to play a central role in cognitive-behavioral therapy for depression. It is concluded that therapists working with depressed clients should be prepared to confront a broad range of biological, psychological, and environmental factors that can create or perpetuate a client's risk for depression. (PsycINFO Database Record (c) 2012 APA, all rights reserved)

SN - 0022-0116

AD - Overholser, James C.: Case Western Reserve U, Dept of Psychology, Cleveland, OH, US

ER -

TY - JOUR

ID - 812

T1 - Risk factors for infant attrition and low engagement in experiments and free-play

A1 - Oates, John

Y1 - 1998///

N1 - Peer Reviewed Journal: 1998-11927-002

English

Journal; Peer Reviewed Journal

KW - PsycInfo  
 KW - Childhood Play Behavior  
 KW - Cognitive Processes  
 KW - Experimental Attrition  
 KW - Risk Assessment  
 RP - NOT IN FILE  
 SP - 555  
 EP - 569  
 JF - Infant Behavior & Development  
 JA - Infant behav  
 VL - 21:  
 IS - 4

N2 - Forty-three 2-month-old infants participated with their mothers in a laboratory study of factors associated with variations in infants' attrition and levels of attention/engagement in a cognitive-perceptual experiment, and in free-play with their mothers. Increased risk of attrition from the experiment was strongly associated with analgesic medication having been administered during labor and with more restricted maternal perceptions of infants' capacities. Attrition rates and levels of engagement varied independently, showing different patterns of association with explanatory variables. Infants' levels of engagement in the experiment and in free-play were correlated across settings and low levels were associated with a lack of maternal identification with the fetus during early pregnancy and more limited maternal perceptions of their infants' capacities, but were not associated with analgesic medication during labor. (PsycINFO Database Record (c) 2012 APA, all rights reserved) (journal abstract)

SN - 0163-6383

AD - Oates, John: Open U, School of Education, Ctr for Human Development & Learning, Milton Keynes, England

ER -

TY - JOUR

ID - 814

T1 - Arousal modulation in cocaine-exposed infants. [References]

A1 - Bendersky, Margaret

Y1 - 1998///

N1 - Peer Reviewed Journal: 1998-01885-015

English

Journal; Peer Reviewed Journal

KW - PsycInfo

KW - Cocaine

KW - Emotional Adjustment

KW - Mother Child Relations

KW - Prenatal Exposure

KW - Stress Reactions

KW - Social Interaction

RP - NOT IN FILE

SP - 555

EP - 564

JF - Developmental Psychology

JA - Dev.Psychol.

VL - 34:

IS - 3

N2 - The ability to modulate arousal is a critical skill with wide-ranging implications for development. In this study, the authors examined arousal regulation as a function of levels of prenatal cocaine exposure in 107 infants at 4 months of age using a "still-face" procedure. Facial expressions were coded. A greater percentage of heavily cocaine-exposed infants, compared with those who were unexposed to cocaine, showed less enjoyment during en face play with their mothers and continued to show negative expressions during the resumption of play following a period when the interaction was interrupted. This finding was independent of other substance exposure, neonatal medical condition, environmental risk, maternal contingent responsivity, and concurrent

maternal sensitivity and vocalizations. (PsycINFO Database Record (c) 2012 APA, all rights reserved) (journal abstract)

SN - 0012-1649

AD - Bendersky, Margaret: U Medicine & Dentistry of New Jersey-Robert Wood Johnson Medical School, Inst for the Study of Child Development, New Brunswick, NJ, US

ER -

TY - JOUR

ID - 815

T1 - The relation of change in maternal interactive styles to the developing social competence of full-term and preterm children

A1 - Landry, Susan H.

Y1 - 1998///

N1 - Peer Reviewed Journal: 1998-00500-010

English

Journal; Peer Reviewed Journal

KW - PsycInfo

KW - At Risk Populations

KW - Birth Weight

KW - Mother Child Relations

KW - Psychosocial Development

KW - Social Skills

KW - Childhood Development

KW - Longitudinal Studies

KW - Mothers

RP - NOT IN FILE

SP - 105

EP - 123

JF - Child Development

JA - Child Dev.

VL - 69:

IS - 1

N2 - Evaluated the changing nature of mothers' interactive behaviors to understand alterations in children's social development across 6, 12, 24, and 40 mo of age. Social skills were observed during daily activities and toy play in the home for 73 medically high risk and 114 low risk very low birthweight (VLBW) preterm and 112 full-term (FT) children. Variations in mothers' responses to children's changing capabilities predicted rates of change in children's social skills. For example, mothers who showed higher levels of maintaining measured across 6 to 40 mo had children who displayed greater increases in initiating, but this was more apparent in daily activities than toy play and for the VLBW children compared to the FT children. Those VLBW children at the highest degrees of biological risk displayed faster gains in initiating than the other groups when their mothers provided even greater levels of support. Results demonstrate the importance of using methodologies that test more complex models of growth when evaluating parent-child relations. (PsycINFO Database Record (c) 2012 APA, all rights reserved)

SN - 0009-3920

AD - Landry, Susan H.: U Texas Medical School, Dept of Pediatrics, Div of Developmental Pediatrics, Houston, TX, US

ER -

TY - JOUR

ID - 816

T1 - Applying the BeSafe method to product safety evaluation

A1 - Benedyk, Rachel

Y1 - 1998///

N1 - Peer Reviewed Journal: 1997-42652-001

English

Journal; Peer Reviewed Journal

KW - PsycInfo

KW - Human Factors Engineering

KW - Playgrounds

KW - Risk Management

KW - Safety

KW - Risk Assessment

KW - Consumer Behavior

KW - Evaluation

RP - NOT IN FILE

SP - 5

EP - 13

JF - Applied Ergonomics

VL - 29:

IS - 1

N2 - The BeSafe (Behavioural Safety) Method, has been developed by International Mining Consultants Ltd for assessing and reducing risk in industrial contexts. BeSafe is an ergonomic method of risk analysis and reduction, targeted at prevention of accidents due to human errors and violations, and emphasizing management strategies for action. Using the BeSafe Method, it may be possible to structure safety assessments of the use of products and target improvement measures. The authors tested the relevant parts of the method on children's play equipment in 24 playgrounds, and questionnaires were also administered to 348 7-11 yr olds and 15 adults. Useful results were obtained, suggesting that BeSafe could be adapted for other consumer products in a similar way. (PsycINFO Database Record (c) 2012 APA, all rights reserved)

SN - 0003-6870

AD - Benedyk, Rachel: U London, University Coll, Ergonomics & HCI Unit, London, England

ER -

TY - JOUR

ID - 817

T1 - The influence of peers on children's judgments about engaging in behaviors that threaten their safety

A1 - Christensen,Sally

Y1 - 1997///

N1 - Peer Reviewed Journal: 1999-01232-008

English

Journal; Peer Reviewed Journal

KW - PsycInfo

KW - Child Attitudes

KW - Choice Behavior

KW - Peer Pressure

KW - Risk Taking

KW - Safety

KW - Judgment

RP - NOT IN FILE

SP - 547

EP - 562

JF - Journal of Applied Developmental Psychology

VL - 18:

IS - 4

N2 - Examined peer influences on children's judgments about engaging in behaviors that threaten their physical safety. 77 Ss (aged 8.2-9.1 yrs) were shown pictures depicting play situations which involved different paths of travel, each of which posed different degrees of injury risk. Ss were asked to select the path they would take, and to assign a danger rating to reflect their beliefs about the likelihood of injury. A peer-influence session followed, in which a same-sex friend attempted to persuade the S to take another path. Following exposure to the friend's arguments, Ss made their final decision about a path of travel in each play situation. A number of other measures were used to determine factors that influence Ss' risk-taking decisions. Results revealed that friends were successful in their persuasion efforts: for 2 of the 3 play situations, a significant number of Ss who initially selected low-risk paths switched to more risky paths. Appraisal of danger related to initial path

decisions, but number of hazards identified and injury history did not significantly relate to initial decisions. The implications of these results for the understanding of injury-outcome processes are discussed. (PsycINFO Database Record (c) 2012 APA, all rights reserved)

SN - 0193-3973

AD - Christensen, Sally: U Guelph, Guelph, ON, Canada

ER -

TY - JOUR

ID - 818

T1 - Symbolic talk in preschoolers who have had infant heart surgery

A1 - Ovadia, Rebecca

Y1 - 1997///

N1 - Dissertation Abstract: 1997-95021-250

English

Dissertation Abstract

KW - PsycInfo

KW - Heart Surgery

KW - Infant Development

KW - Language Development

KW - Parent Child Communication

RP - NOT IN FILE

SP - 1586

JF - Dissertation Abstracts International Section A: Humanities and Social Sciences

VL - 58:

IS - 5-A

N2 - Most infants who are born with heart defects can be cured by surgical treatment, but may suffer learning difficulties, which are often identified only when they enter school. Research suggests that these potential adverse developmental outcomes are related to brain damage incurred during infant cardiac surgery. Currently, however, studies reveal conflicting results regarding the range of cognitive, motor, and language delays in children who have had early corrective heart surgery (ECHS). Often, these learning difficulties are subtle and not easily identified using standard cognitive tests. Nevertheless, given the prevalence of congenital heart disease and the wide range of developmental outcomes in children with ECHS, clinicians need tools for the early identification of children at risk for later academic difficulties. While language abilities in the preschool period may be especially vulnerable in ECHS children, there is presently little research on language outcomes in these children. Standard language measures appear to overlook potential areas of difficulty; however, tasks examining extended discourse competence seem to identify subtle but significant language difficulties. For example, a few studies suggest that ECHS children produce fewer narrative events, evaluations, story play episodes, and overall, less symbolic play talk than a normative group. In this project, the nature of these language difficulties is investigated during parent-child pretend play in four year old children with ECHS. This project is part of a larger research project at Children's Hospital in Boston, whose primary objective is to compare developmental sequelae of two surgical support techniques, total circulatory arrest (TCA) and low-flow bypass (LFB). Results show that ECHS children use predominantly early acquired verbal strategies to participate in pretend play with parents, including focus on concrete talk, production of few, mostly fragmented story episodes, and reliance on parents to initiate or maintain symbolic talk. These participation styles suggest difficulty with discourse skills. Children who had the TCA support technique showed worse status on symbolic talk outcomes than children who had LFB, and children who had early postoperative seizures showed worse performance than children who had no seizures. (PsycINFO Database Record (c) 2012 APA, all rights reserved)

SN - 0419-4209

AD - Ovadia, Rebecca: Harvard U, US

ER -

TY - JOUR

ID - 819

T1 - Infant space, infant time: Development of infant interactions with the physical environment, from 1 to 18 months

A1 - Pierce, Doris Emma

Y1 - 1997///

N1 - Dissertation Abstract: 1997-95006-181

English

Dissertation Abstract

KW - PsycInfo

KW - Childhood Play Development

KW - Cognitive Development

KW - Infant Development

KW - Motor Development

KW - Spatial Learning

RP - NOT IN FILE

SP - 5949

JF - Dissertation Abstracts International: Section B: The Sciences and Engineering

VL - 57:

IS - 9-B

N2 - This study describes the typical development of independent infant negotiations of the spatial and temporal dimensions of the physical environment of the home. The study's design was qualitative and longitudinal, using videotapes and maternal interviews from a cross-class sample of 18 typically-developing Caucasian infants followed from ages 1 to 18 months of age. The focus of data collection was self-directed play with the objects and spaces of the home. At the broadest level, this theory highlights three central characteristics of human occupation: instrumentality, intentionality, and the interactive dynamic between individual with context. Description of the emergence of the infant's capacity to instrumentally negotiate and manipulate the space and objects of the physical environment included ranging patterns, activity maps, the motor lens, the role of gaze and visual play, and a variety of types of stationary and mobile object interactions, including previously undescribed types of play such as dancing, climbing, propelling, driving, carries, and ferries. The infant's increasing intentionality was seen in developmental changes in the temporality of infant object play across three existing sequence lengths: the infant object interaction, phases within that interaction, and series of infant object interactions. Viewing this interaction across development revealed the lengthening of interactions, strengthening of the infant's ability to conceive and complete an action over time, and the extension of the infant's temporal horizons into past and future. Contextual influences on the infant's play in the home were described within sociocultural, spatial, temporal, and physiological domains. This occupational science study provides a developmental description of a set of human occupations in their simplest infant forms. As such, it contributes to the understanding of occupation, as well as promising potential to support the play-based interventions of occupational therapists working with children at risk for developmental delays. (PsycINFO Database Record (c) 2012 APA, all rights reserved)

SN - 0419-4217

AD - Pierce, Doris Emma: U Southern California, US

ER -

TY - JOUR

ID - 820

T1 - A prospective study of prenatal cocaine exposure: Language, play, and global cognitive abilities in 2-year-olds

A1 - Toth-Sadjadi, Susan Katalin

Y1 - 1997///

N1 - Dissertation Abstract: 1997-95006-113

English

Dissertation Abstract

KW - PsycInfo

KW - Childhood Play Development

KW - Cocaine

KW - Cognitive Ability

KW - Language Development

KW - Prenatal Exposure

KW - Cognitive Development

KW - Drug Dosages

RP - NOT IN FILE

SP - 5951

JF - Dissertation Abstracts International: Section B: The Sciences and Engineering

VL - 57:

IS - 9-B

N2 - The relationship between prenatal cocaine exposure and 2-year developmental outcome was examined in a sample of 200, 2-year-old children followed prospectively from birth. Adverse cocaine effects were hypothesized to emerge in highly-exposed children, rather than the whole group, and in the specific developmental abilities of language and play, rather than global cognitive skills. Cocaine-exposed toddlers (n = 100) were successfully group-matched with non-cocaine-exposed toddlers (n = 100) on selected maternal demographics, child characteristics, and other prenatal drug exposures. Women in both groups completed 12 years of education, were in their mid-20's, primarily white, and similar on marijuana use and binge alcohol use during pregnancy (but greater parity and cigarette use for cocaine-using women). Prenatal cocaine use was gathered via self report on the day after delivery and later verified by maternal hair analysis. Productive child language was obtained from caregiver report and videotaped, caregiver-child interaction. Quality of play behaviors were coded from videotaped, child-alone play. Global cognitive skills were assessed with the Bayley. Total grams of cocaine used throughout pregnancy was the predictor in dose-response regression analyses, while group differences were compared with t-tests. Confounds not dealt with by study design (e.g., postnatal environment) were adjusted in statistical analyses. Neither dose-response nor group difference analyses revealed independent, adverse effects of prenatal cocaine exposure. For both groups, productive language was within normal age limits, global cognitive skills were in the low-average range, and the quality of most play behaviors was age- and context-appropriate. However, subtle signs of immature play behaviors (e.g., unelaborated play) were exhibited by both groups and a subset of children in both groups exhibited general cognitive delay. Findings suggest that early language, play, and general cognitive abilities are not adversely affected by cocaine, even for the most highly-cocaine-exposed children, but may be more related to moderating postnatal environmental factors. Results confirm the need to examine developmental outcome in terms of the complex interrelationships between cocaine exposure and the risk and protective factors in the postnatal environment. (PsycINFO Database Record (c) 2012 APA, all rights reserved)

SN - 0419-4217

AD - Toth-Sadjadi, Susan Katalin: U Washington, US

ER -

TY - JOUR

ID - 821

T1 - Pretense in pair play therapy: Examining the understanding of emotions in young at-risk children

A1 - Raya, Pamela Arboleda

Y1 - 1997///

N1 - Dissertation Abstract: 1997-95002-287

English

Dissertation Abstract

KW - PsycInfo

KW - At Risk Populations

KW - Comprehension

KW - Emotions

KW - Play Therapy

KW - Childhood Play Behavior

RP - NOT IN FILE

SP - 4751

JF - Dissertation Abstracts International: Section B: The Sciences and Engineering

VL - 57:

IS - 7-B

N2 - Young children who experience tremendous stresses in their lives tend to be at risk for poor interpersonal relationships. Research has shown that emotional understanding facilitates satisfactory social interactions. In this study, twelve young at-risk children's understanding of emotions is considered. All the children participated in a relational prevention-intervention program called Pair Play Therapy (PPT). To undertake this investigation, a system for examining how young children understand emotions through their pretend play, named the



Emotions in Pretense Coding Scheme (EPS), was developed first and its reliability established. Secondly, EPS was used to document the twelve children's pretend play over time and their elaborations on the Nice and Mean Interaction Scales stories. The pretense performed by these children was coded for (a) affective play themes, (b) emotions and their respective intensities, (c) the complexity of the emotion representations, and (d) the congruence between themes, emotions, and actual affective display. By compiling and comparing frequency differences between positive themes and negative themes, and frequency differences between positive emotions and negative emotions for each child, I identified three distinct groups of children. Analyses of the differences in representation preferences among the three groups were statistically significant ( $\alpha = .05$ ). Group 1 pretend play performances clearly showed a high predominance of negative themes and emotions, especially anger. Group 2 children showed an inclination towards fairly to moderately intense and frequent depictions of negative themes and emotions (except for more intense portrayals of fear compared to other emotions) in their play. Group 3 children tended to portray positive themes and positive emotions more often in their play. In the Nice and Mean Scales, the children, especially Group 1, tended to transform positive interaction stories into negative ones. In addition, the (PsycINFO Database Record (c) 2012 APA, all rights reserved)

SN - 0419-4217

AD - Raya, Pamela Arboleda: Harvard U, US

ER -

TY - JOUR

ID - 822

T1 - 101 favorite play therapy techniques

A1 - Kaduson, Heidi G.

Y1 - 1997///

N1 - Book: 1997-36793-000

English

Book; Edited Book

(Created by PsycINFO) Preface Section one: Fantasy techniques \* The playing baby game / Charles E. Schaefer \* Using guided imagery to augment the play therapy process / Kevin O'Connor \* The rosebush / Violet Oaklander \* Pretending to know how / S. Eileen Theiss Section two: Storytelling techniques \* The feeling word game / Heidi Gerard Kaduson \* The card story game / Norma Y. Leben \* Storytelling with felts / Linda Mattingly \* The box of buttons technique / Jo Ann L. Cook \* Computer storytelling / N. E. Brewer \* Using metaphors, fairy tales and storytelling in psychotherapy with children / Jamshid A. Marvasti \* Art or verbal metaphors for children experiencing loss / Glenda F. Short \* The guess my word story game / Mary Repp \* The scarf story / Steve Harvey \* Storytelling with objects / Jackie K. Frederiksen Section three: Expressive arts techniques \* The before and after drawing technique / Donna Cangelosi \* Feeling balloons / Glenda F. Short \* Magic art / Ruby Walker \* The yarn drawing game / Norma Y. Leben \* Clayscapes / Lynn B. Hadley \* Bad dreams / L. G. Agre \* The personality pie / Tara M. Sinclair \* Life maps / Glenda F. Short \* Play art / Lynn B. Hadley \* Gloop: Treating sensory deprivation / Neil Cabe \* The clay squiggle technique / Richard Frankel \* Expressive arts playdough / Lynn B. Hadley \* Inner-reference / Aimee H. Short \* Reworking / Sheri Saxe \* A line down the middle of the page / Dolores M. Conyers \* Create-a-community / Nancy H. Cochran \* Outline drawings of boys and girls / Barbara A. Turner \* The picture drawing game / Stanley Kissel \* The color-emotive brain / Sheldon Berger and Jonna L. Tyler \* Scribble art / Leslie Hartley Lowe \* The feelings tree / Joyce Meagher \* Design-a-Dad / Stazan K. Sina \* Synthetic clay in play therapy / Martha D. Young Section four: Game play techniques \* Checkers: Rules or no rules / L. G. Agre \* Beat the clock / Heidi Gerard Kaduson \* Pounding away bad feelings / Donna Cangelosi \* The pick-up-sticks game / Barbara McDowell \* The stealing game / Steve Harvey \* Consequences: Reaching the oppositional defiant adolescent / Neil Cabe \* Hide-and-seek in play therapy / John Allan and Mary Anne Pare \* The spy and the sneak / Bria Bartlett-Simpson \* Pool play: Helping children get out from behind the eight ball / Stanley Kissel \* Tumbling feelings: Easing children into the counseling relationship / Christina Mattise \* Make your own board game / Sandy Carter \* Chess playing as a metaphor for life choices / Leslie Hartley Lowe Section five: Puppet play techniques \* Battaro and the puppet house / Martha J. Harkin \* The dowel finger puppet technique / Jo Ann L. Cook \* Create-a-puppet / Anne Blackwell \* Using a puppet to create a symbolic client / Carolyn J. Narcavage \* Puppetry / Marie Boultinghouse \* On the one hand and then on the other / Christina Mattise Section Six: Play toys and objects techniques \* Bodysox / Kimberly Dye \* The me doll / Jessica Stone-Phennicie \* Tearing paper / Kathy Daves \* The mad game / Patricia Davidson \* Sculpt-it / Michael Cascio \* The magic carpet technique / Dolores M. Conyers \* The snake / Alan Lobaugh \* The baby bottle technique / Diane Murray \* The T-shirt technique /

Nancy H. Cochran \* The photo album technique / Sueanne Brown \* The angry tower / Sheri Saxe \* Balloons of anger / Tammy Horn \* The worry can technique / Debbie S. Jones \* The cardboard city / Berrell Mallery and Randall Martin \* Fortune tellers / Judith Friedman Babcock \* Jenga and a camera / Catherine G. Tierney \* The anger shield / Teresa A. Glatthorn \* Using self-made books to prepare children for predictable trauma or crisis / Kevin O'Connor \* The angry feeling scale game / Joyce Meagher \* Stomping feet and bubble popping / Cathy Wunderlich \* Knocking down the walls of anger / Jennifer Leonetti \* Figures / Sylvia Fisher Section Seven: Group play techniques \* Elastablast / Kimberly Dye \* Group building activity / Glenda F. Short \* The captains of Avatar: A space adventure for children in transition / Tara M. Sinclair \* Mr. Ugly / Mary May Schmidt \* Therapeutic puppet group / Aileen Cunliffe \* Group puppet show / Glenda F. Short \* Mutual storytelling through puppet play in group play therapy / Mitch Jacobs Section eight: Other techniques \* Using drawings of early recollections to facilitate life style analysis for children in play therapy / Harold M. Heidt \* Self figures for sand tray / L. Jean Ley and Jean Howze \* The worry list / Richard Sloves \* My baby book / Karen Pitzen \* The song flute or recorder / Robert W. Freeman \* The starting over wedding gown ceremony / Patricia B. Grigoryev \* Play therapy and pets / Mary-Lynn Harrison \* The twelve-to-one technique / Mary May Schmidt \* The therapist on the inside / Patricia B. Grigoryev \* Play-by-play / David A. Snyder \* The time line tape technique / Jo Ann L. Cook \* Terminations utilizing metaphor / Teresa A. Glatthorn \* The feelings center / Helen E. Benedict \* The disposable camera technique / Jo Ann L. Cook \* Use of animals in a play therapy setting / S. Eileen Theiss \* The popcorn walk / Allan Gonsler \* Co-play therapy / Ann C. Levinger

KW - PsycInfo

KW - Mental Disorders

KW - Play Therapy

KW - Psychotherapeutic Techniques

RP - NOT IN FILE

SP - Lanham, MD, US

JF - (1997)

VL - 101 favorite play therapy techniques. xvi, 401 pp. Lanham, MD, US: Jason Aronson; US.

N2 - (from the jacket) Building on children's natural inclinations to pretend and re-enact, play therapy is widely used in the treatment of psychological problems in childhood. This book incorporates methods developed to elicit the best responses from children by therapists representing cognitive-behavioral, psychodynamic, and other orientations, and selected for their practicality, specificity, and originality. Arranged for easy reference, each bearing a succinct description and targeted application, the interventions illustrated-including fantasy, storytelling, expressive arts, game play, puppet play, play toys and objects, and group play-have been used with success to address such common problems as low self-esteem and unresolved fear and anger as well as more serious difficulties arising from loss, abuse, and sexual trauma. (PsycINFO Database Record (c) 2012 APA, all rights reserved)

ER -

TY - JOUR

ID - 824

T1 - Family play therapy using a resiliency model. [References]

A1 - Seymour,John W.

Y1 - 1996///

N1 - Peer Reviewed Journal: 1997-05135-002

English

Journal; Peer Reviewed Journal

KW - PsycInfo

KW - Family Therapy

KW - Play Therapy

KW - Resilience (Psychological)

KW - Therapeutic Processes

KW - Treatment Planning

KW - Life Experiences

KW - Models

RP - NOT IN FILE

SP - 19

EP - 30

JF - International Journal of Play Therapy

VL - 5:

IS - 1

N2 - Children are at risk for current and future problems when they are faced with multiple life transitions. Their families are also significantly effected during these times of change and crisis. The authors describe a family play therapy approach for treating these children at risk, using M. Rutter's resiliency model as a framework for conceptualizing treatment planning and the therapeutic process. (PsycINFO Database Record (c) 2012 APA, all rights reserved)

SN - 1555-6824

AD - Seymour, John W.: East Texas State U, TX, US

ER -

TY - JOUR

ID - 825

T1 - Affect and behavior in the triadic play of parents and sons with attention deficit/hyperactivity disorder and normal comparison families: Effects of stimulant medication and predictions to peer status

A1 - Leddick, Katherine Howard

Y1 - 1996//

N1 - Dissertation Abstract: 1996-95009-267

English

Dissertation Abstract

KW - PsycInfo

KW - Attention Deficit Disorder

KW - Hyperkinesis

KW - Parent Child Relations

KW - Peer Relations

KW - Social Behavior

KW - CNS Affecting Drugs

KW - Emotional States

KW - Father Child Relations

KW - Interpersonal Interaction

KW - Mother Child Relations

RP - NOT IN FILE

SP - 6397

JF - Dissertation Abstracts International: Section B: The Sciences and Engineering

VL - 56:

IS - 11-B

N2 - Poor social adjustment in childhood is associated with negative outcomes in adolescence and adulthood ranging from continuing difficulties in social relationships to problems in occupational performance, arrests, and psychiatric status. For children with attention-deficit hyperactivity disorder (ADHD), difficulties in social relations are among the most salient aspects of their psychopathology. ADHD children engage in more negative interactions with their mothers, fathers, and peers and are more frequently rejected by peers. Little is known, however, about the playful interactions of ADHD boys with both parents or about family-peer linkages in this group of youngsters at risk. Past research indicates that family relationships, perhaps relationships with fathers in particular, may be important in understanding the course of disorder in ADHD boys. Some research also indicates that qualitative differences in parent-son relationships emerge when all three people are present. This study examines the affect and behavior of each family member in triadic, playful family interactions and children's peer status. Families (N = 70) are mothers, fathers, and boys who participated in one of two summer enrichment programs for ADHD and undiagnosed comparison boys between the ages of 6 and 12 years. Families of ADHD boys played twice on different days, and comparison families played once. Before the interactions, ADHD sons were administered stimulant medication (.3 mg/kg) in a counterbalanced, placebo-controlled, double-blind procedure. Few diagnostic group differences or medication effects emerged in family members' affect and interactive behavior in the playful context. However, strong associations were obtained between family measures and boys' peer status at the end of the 5-week summer programs. Associations were found between family measures and boys' peer acceptance, peer rejection, and social preference. Moreover,

diagnostic group differences and age effects emerged in t (PsycINFO Database Record (c) 2012 APA, all rights reserved)

SN - 0419-4217

AD - Leddick, Katherine Howard: U California, Los Angeles, US

ER -

TY - JOUR

ID - 826

T1 - The impact of low-risk prematurity on maternal behaviour and toddler outcomes

A1 - Barratt, Marguerite Stevenson; Roach, Mary

Y1 - 1996///

N1 - Peer Reviewed Journal: 1996-06905-007

English

Journal; Peer Reviewed Journal

KW - PsycInfo

KW - Infant Development

KW - Mother Child Communication

KW - Mother Child Relations

KW - Mothers

KW - Premature Birth

KW - Followup Studies

RP - NOT IN FILE

SP - 581

EP - 602

JF - International Journal of Behavioral Development

VL - 19:

IS - 3

N2 - Examined the impact of prematurity on patterns of maternal responsiveness, styles of maternal interaction, and toddlers' developmental outcomes. Mother-toddler free-play interaction and toddler developmental assessments were conducted at 12 and 20 mo of gestationally corrected age for 21 low-medical-risk preterm Ss and 21 full term Ss matched on the Social Status Index (A. B. Hollingshead, 1978). While maternal vocal and attentional responsiveness did not differ at 12 mo, mothers of full term Ss were more vocally responsive at 20 mo. Mothers of preterm Ss exhibited more control behavior when Ss were 12 and 20 mo old than did mothers of fullterm Ss. No differences in the cognitive and language performance of both groups at the ages of 12 and 20 mo were observed. In terms of play skills, the preterm Ss were more actively involved than the full term Ss. Despite the successful adjustment of these low-risk preterm Ss, maternal behavior was affected by the circumstances of preterm birth, even after 20 mo. (PsycINFO Database Record (c) 2012 APA, all rights reserved)

SN - 0165-0254

AD - Barratt, Marguerite Stevenson: U Wisconsin, Madison, WI, US

ER -

TY - JOUR

ID - 827

T1 - A play-focused intervention involving mothers of preschoolers

A1 - Esdaile, Susan A.

Y1 - 1996///

N1 - Peer Reviewed Journal: 1996-02401-005

English

Journal; Peer Reviewed Journal

KW - PsycInfo

KW - Childhood Development

KW - Childhood Play Behavior

KW - Mother Child Relations

KW - Occupational Therapy

KW - Stress

KW - Followup Studies

KW - Mothers

RP - NOT IN FILE

SP - 113

EP - 123

JA - American Journal of Occupational Therapy

VL - 50:

IS - 2

N2 - Studied the effectiveness of an occupational therapy (OT) intervention program for 35 mothers (mean age 28.4 yrs) of preschool children to enhance their interactions through play, reduce mothers' perceived stress, and increase their knowledge about child development. Ss were assigned either to a control group or to 2 intervention groups. In the interventions, Ss engaged in toy making and demonstrations, and were given information on play development and children's behavior. Maternal causal attributions for parent-child interaction outcomes, stress, self concept as educator, and children's behavior before, after, and at 18 mo followup were assessed. The program was rated positively by the mothers but did not result in major group differences. However, there was an increase in the self-concept of some mothers as educators of their children. OT can provide effective prevention programs for mothers and children at risk. (PsycINFO Database Record (c) 2012 APA, all rights reserved)

SN - 0272-9490

AD - Esdaile, Susan A.: Wayne State U, Coll of Pharmacy & Allied Health Professions, Dept of Occupational Therapy, Detroit, MI, US

ER -

TY - JOUR

ID - 829

T1 - The effects of prematurity and other perinatal factors on infants' mastery motivation

A1 - Harmon, Robert J.

Y1 - 1995///

N1 - Book: 1996-97609-009

English

Book; Edited Book

KW - PsycInfo

KW - Achievement Motivation

KW - Premature Birth

KW - Cognitive Development

KW - Literature Review

KW - Measurement

KW - Perinatal Period

RP - NOT IN FILE

SP - 237

EP - 256

JF - MacTurk, Robert H [Ed]; Morgan, George A [Ed]

VL - :

IS - 1995

N2 - (from the chapter) [reviews] recent studies of cognitive development and mastery motivation of perinatal risk infants, particularly premature infants review of cognitive development studies / review of studies of object play / review of mastery motivation studies / free play assessment / structured tasks assessment / adult report questionnaire (PsycINFO Database Record (c) 2012 APA, all rights reserved)

AD - Harmon, Robert J.: U Colorado, School of Medicine, Denver, CO, US

ER -

TY - JOUR

ID - 830

T1 - Learning to pretend: Preschoolers' use of meta-communication in sociodramatic play

A1 - Halliday-Scher, Kathy; Urberg, Kathryn

Y1 - 1995///

N1 - Peer Reviewed Journal: 1996-16930-001

English

Journal; Peer Reviewed Journal

KW - PsycInfo

KW - Age Differences

KW - Childhood Play Behavior

KW - Imagination

KW - Metacognition

KW - Verbal Communication

RP - NOT IN FILE

SP - 451

EP - 461

JF - International Journal of Behavioral Development

VL - 18:

IS - 3

N2 - Investigated the relation of children's differential use of verbal metacommunication to play theme, player's age, and episode duration, by observing the naturally occurring sociodramatic play of 30 preschoolers (aged 29-68 mo) in a university day care facility. Children's use of within-frame and out-of-frame metacommunication was unrelated to the duration of sociodramatic play. However, children's use of out-of-frame metacommunication was related to age. Older children used a greater percentage of out-of-frame metacommunication than did younger children. Furthermore, although there was no main effect of theme, there was an interaction between age and theme. Older children used less within-frame metacommunication than did younger children during adventure/fantastic episodes, but used an equivalent proportion during domestic/occupational episodes. (PsycINFO Database Record (c) 2012 APA, all rights reserved)

SN - 0165-0254

AD - Halliday-Scher, Kathy: Wayne State U, Dept of Psychology, Detroit, MI, US

ER -

TY - JOUR

ID - 831

T1 - Focused play therapy and non-directive play therapy: Can they be integrated?

A1 - Rasmussen, Lucinda A.

Y1 - 1995///

N1 - Peer Reviewed Journal: 1996-05499-001

English

Journal; Peer Reviewed Journal

KW - PsycInfo

KW - Child Abuse

KW - Play Therapy

KW - Sexual Abuse

KW - Victimization

RP - NOT IN FILE

SP - 1

EP - 20

JF - Journal of Child Sexual Abuse: Research, Treatment, & Program Innovations for Victims, Survivors, & Offenders

VL - 4:

IS - 1

N2 - Reviews the rationale for both nondirective and focused approaches to play therapy. Nondirective techniques can have some disadvantages when used with abused children. Being totally nondirective can place the child at risk for additional abuse or further inappropriate behaviors. Abuse-reactive children are unlikely to deal with the issues underlying their inappropriate sexual behaviors unless therapists confront these issues directly. A prescriptive approach is proposed that combines the rapport building component of nondirective play therapy with focused techniques (i.e., cognitive-behavioral therapy, metaphors, bibliotherapy, and art therapy). This integrated approach can meet the therapeutic needs of sexually abused and abuse-reactive children. (PsycINFO Database Record (c) 2012 APA, all rights reserved)

SN - 1053-8712

AD - Rasmussen, Lucinda A.: Primary Children's Medical Ctr, Child Protection Team, Salt Lake City, UT, US  
ER -

TY - JOUR

ID - 832

T1 - The effect of maternal psychiatric disorder on responsivity in the mother-child interaction and on the development of children's coping behavior

A1 - Hughes,Susan Maureen

Y1 - 1995///

N1 - Dissertation Abstract: 1995-95015-002

English

Dissertation Abstract

KW - PsycInfo

KW - Coping Behavior

KW - Infant Development

KW - Mental Disorders

KW - Mother Child Relations

KW - Mothers

RP - NOT IN FILE

SP - 1127

JF - Dissertation Abstracts International: Section B: The Sciences and Engineering

VL - 56:

IS - 2-B

N2 - Since the turn of the century, there has been a general awareness that children raised by parents with psychiatric disorders remain at risk for psychopathology themselves. This research investigates the mother-child responsivity and coping behavior of high risk children. Two groups of mother-infant dyads (N = 60) (mothers with and without psychiatric disorders) were coded during a videotaped, semi-structured play interaction using the CARE-Index. Results indicated that mothers with psychiatric disorders were significantly less sensitive and more unresponsive with their children than normal mothers. Mothers with psychiatric disorders who had extreme levels of psychosocial stress were significantly less sensitive and more controlling than those mothers diagnosed as living under less stressful circumstances. Children of mothers with psychiatric disorders were significantly less cooperative with their mothers in the play interaction. The results indicated that children whose mothers had chronic psychiatric disorders demonstrated significantly less effective coping behavior on all subscales of the Early Coping Inventory. Implications for the identification and treatment of children at risk for psychiatric disorder are discussed. (PsycINFO Database Record (c) 2012 APA, all rights reserved)

SN - 0419-4217

AD - Hughes, Susan Maureen: Mcgill U, Canada

ER -

TY - JOUR

ID - 833

T1 - "Interactional style of at-risk and well-adapted children observed in two play settings: Competitive and cooperative": Erratum. [Italian]

A1 - Fonzi,Ada; Menesini,Ersilia; Gentili,Cristiana

Y1 - 1994///

N1 - Peer Reviewed Journal: 1996-85757-001

Italian

Journal; Peer Reviewed Journal

KW - PsycInfo

KW - At Risk Populations

KW - Competition

KW - Cooperation

KW - Problem Solving

KW - Games

KW - Interpersonal Interaction

KW - Oral Communication

RP - NOT IN FILE

SP - 119

JF - Ricerche di Psicologia

VL - 18:

IS - 4

N2 - Reports an error in a previously published article by A. Fonzi et al (Ricerche di Psicologia, 1994, Vol 18[2], 151-265). The article omitted a graphic depiction of competitive play, which is reproduced here. (The following abstract of this article originally appeared as 32:85623.) Studied the differences in behavior in competitive and cooperative situations between normal children and children classified as being "at risk" by school and government authorities because of behavioral or family problems. Differences in game-playing strategies and in verbal interactions between the 2 groups were assessed. Ss were 10 at-risk male children and 10 normal males (all aged 9-11 yrs). Ss were observed in 4 different game-playing situations: 2 competitive games and 2 cooperative games, 1 of each with members of the same group and members of the other group. (English abstract) (PsycINFO Database Record (c) 2012 APA, all rights reserved)

SN - 0391-6081

AD - Fonzi, Ada: U degli Studi, Florence, Italy

ER -

TY - JOUR

ID - 835

T1 - Encounters with aggressive peers in early childhood: Frequency, age differences, and correlates of risk for behaviour problems

A1 - Sinclair, Jamie J.

Y1 - 1994///

N1 - Peer Reviewed Journal: 1995-20982-001

English

Journal; Peer Reviewed Journal

KW - PsycInfo

KW - Age Differences

KW - Aggressive Behavior

KW - Human Sex Differences

KW - Peer Relations

KW - Family Socioeconomic Level

KW - Parental Characteristics

KW - Social Behavior

RP - NOT IN FILE

SP - 675

EP - 696

JF - International Journal of Behavioral Development

VL - 17:

IS - 4

N2 - Describes the range, types, and quality of social activity settings in which young children have contact with peers, and whether participation in these settings varies as a function of child sex and age (2-4 vs 4-5 yrs), and family demographic characteristics. Ss were 277 preschool-aged children. Each of 7 activity settings (e.g., neighborhood, organized play groups, day care) was rated for frequency of participation and frequency of exposure to aggressive peers. Ss had the greatest amount of peer contact and were exposed to aggressive peers most often in the neighborhood setting. In contrast, Ss participated least frequently in structured play group settings, and these settings were least likely to contain aggressive peers. Ss from lower SES and single-parent families were more likely to be involved in settings (especially neighborhoods) containing aggressive peers. (PsycINFO Database Record (c) 2012 APA, all rights reserved)

SN - 0165-0254

AD - Sinclair, Jamie J.: Auburn U, AL, US

ER -

TY - JOUR



ID - 836

T1 - Preschool children with behavioral problems: Observation in instructional and free play contexts

A1 - Del'Homme, Melissa Ann; Sinclair, Esther; Kasari, Connie

Y1 - 1994///

N1 - Peer Reviewed Journal: 1994-43172-001

English

Journal; Peer Reviewed Journal

KW - PsycInfo

KW - Academic Environment

KW - At Risk Populations

KW - Behavior Problems

KW - Recreation

KW - Social Behavior

KW - Lower Income Level

KW - Minority Groups

KW - Preschool Students

KW - Project Head Start

RP - NOT IN FILE

SP - 221

EP - 232

JF - Behavioral Disorders

VL - 19:

IS - 3

N2 - Examined task-related and social behaviors of teacher-identified preschool children at risk for behavior problems in 2 school settings, a structured instructional context and an unstructured free play context. Ss were 42 preschoolers from low-income, minority families attending local Head Start programs (21 from a teacher-identified problem behavior group and 21 from a nonidentified comparison group). The problem behavior group was composed of approximately equal numbers of Ss at risk for externalizing (EBPs) and internalizing behavioral problems. While all Ss exhibited more on-task behavior in the instructional context than in the free play context, Ss with EBPs exhibited less on-task behavior. EBPs also exhibited more aggressive behavior in the free play context, and along with comparison Ss, showed a strong tendency toward exhibiting more prosocial behavior than internalizers in the instructional context. (PsycINFO Database Record (c) 2012 APA, all rights reserved)

SN - 0198-7429

AD - Del'Homme, Melissa Ann: U California, Mental Retardation Research Ctr, Los Angeles, US

ER -

TY - JOUR

ID - 837

T1 - Investigation of familial and school-based risk factors for Hispanic Head Start children. [References]

A1 - Grossman, Judy

Y1 - 1994///

N1 - Peer Reviewed Journal: 1994-43081-001

English

Journal; Peer Reviewed Journal

KW - PsycInfo

KW - Family

KW - Project Head Start

KW - School Environment

KW - Latinos/Latinas

KW - Emotional Adjustment

KW - Learning

KW - Preschool Students

KW - Social Adjustment

RP - NOT IN FILE

SP - 456

EP - 467

JF - American Journal of Orthopsychiatry

JA - Am J Orthopsychiatry

VL - 64:

IS - 3

N2 - Studied the relation of familial and school-based risk factors to socioemotional and learning problems in 69 3-yr-old Hispanic children (37 girls and 32 boys) in Head Start programs. Measures included a semistructured maternal stress interview schedule and the Miller Assessment for Preschoolers. Socioemotional problems were found to relate most strongly to school-based solitary play, negative peer interaction, and maternal reports of child temperament, while associated learning problems related most strongly to school-based attention span. Solitary play was a significant predictor of socioemotional behavior for boys than for girls, while child temperament as it relates to goodness of fit was significant only for girls. Results underscore the importance of a multidimensional approach to the assessment of child behavior. (PsycINFO Database Record (c) 2012 APA, all rights reserved)

SN - 0002-9432

AD - Grossman, Judy: New York U School of Education, Dept of Occupational Therapy, US

ER -

TY - JOUR

ID - 838

T1 - The play of angry children: A study of ego defenses in the symbolic play of preschool children at-risk for conduct problems

A1 - Spencer-Sanchez, David Michael

Y1 - 1993///

N1 - Dissertation Abstract: 1995-74857-001

English

Dissertation Abstract

KW - PsycInfo

KW - At Risk Populations

KW - Behavior Problems

KW - Childhood Play Behavior

KW - Defense Mechanisms

KW - Ego

KW - Symbolism

RP - NOT IN FILE

SP - 2773

JF - Dissertation Abstracts International

VL - 54:

IS - 5-B

SN - 0419-4217

AD - Spencer-Sanchez, David Michael: Harvard U, MA, US

ER -

TY - JOUR

ID - 839

T1 - A comparative study of observed language behaviors of prekindergarten children at risk of academic failure in the context of a literacy-enriched play environment

A1 - Setthapun, Anong

Y1 - 1993///

N1 - Dissertation Abstract: 1994-74362-001

English

Dissertation Abstract

KW - PsycInfo

KW - At Risk Populations

KW - Childhood Play Behavior

KW - Curriculum

KW - Literacy  
KW - Verbal Ability  
KW - Language  
RP - NOT IN FILE  
SP - 3440  
JF - Dissertation Abstracts International  
VL - 53:  
IS - 10-A  
SN - 0419-4217  
AD - Seththapun, Anong: Southern Illinois U, Carbondale, US  
ER -

TY - JOUR  
ID - 842  
T1 - Play activities of at-risk and non-at-risk elementary students: Is there a difference?  
A1 - Poidevant, John M.  
Y1 - 1993///  
N1 - Peer Reviewed Journal: 1994-23330-001

English

Journal; Peer Reviewed Journal

KW - PsycInfo  
KW - Academic Failure  
KW - At Risk Populations  
KW - Childhood Play Behavior  
KW - Elementary School Students  
KW - Kindergarten Students  
RP - NOT IN FILE  
SP - 173  
EP - 186  
JF - Child Study Journal  
VL - 23:  
IS - 3

N2 - Examined characteristics of play activities of 26 at-risk and 23 non-at-risk students in kindergarten through Grade 3, using the Smilansky Scale for Evaluation of Dramatic and Sociodramatic Play. Group comparisons were made using the 6 subscales of the Smilansky Scale. The 2 groups showed significant differences on 3 scales: Make-Believe with Objects, Make-Believe with Action/Situations, and Verbal Communication. (PsycINFO Database Record (c) 2012 APA, all rights reserved)

SN - 0009-4005  
AD - Poidevant, John M.: Cobb County Schools, Atlanta, GA, US  
ER -

TY - JOUR  
ID - 843  
T1 - Parent-infant play as a window on infant competence: An organizational approach to assessment  
A1 - Beeghly, Marjorie  
Y1 - 1993///  
N1 - Book: 1993-98052-003

English

Book; Edited Book

KW - PsycInfo  
KW - Childhood Play Behavior  
KW - Competence  
KW - Parent Child Relations  
KW - Infant Development  
KW - Measurement  
KW - Nutritional Deficiencies

RP - NOT IN FILE

SP - 71

EP - 112

JF - MacDonald, Kevin [Ed]

VL - :

IS - 1993

N2 - (from the chapter) parent-infant play has long been regarded by developmentalists as an important component of children's cognitive, socioemotional, and self-regulatory development / [argues] that parent-infant play also provides an excellent opportunity for assessing qualitative aspects of infant competence during the first two years of life / the theoretical framework guiding this approach to assessment is the organizational perspective to developmental psychopathology / following a brief review of this perspective, a working definition of infant competence will be provided in the context of the major developmental tasks facing infants during the first two years / selected parent-child play assessment paradigms which challenge infants and toddlers with respect to these stage-salient issues will then be described parent-toddler play in an illustrative risk population-toddlers with intrauterine growth retardation (IUGR) [resulting from maternal malnutrition]-will be examined in order to demonstrate the usefulness of parent-child play paradigms for assessing key dimensions of competence in these children (PsycINFO Database Record (c) 2012 APA, all rights reserved)

AD - Beeghly, Marjorie: Harvard Medical School, Boston, MA, US

ER -

TY - JOUR

ID - 845

T1 - Sibling play therapy with homeless children: An opportunity in the crisis

A1 - Hunter,Linda B.

Y1 - 1993///

N1 - Peer Reviewed Journal: 1993-30410-001

English

Journal; Peer Reviewed Journal

KW - PsycInfo

KW - Homeless

KW - Interpersonal Communication

KW - Play Therapy

KW - Self Esteem

KW - Siblings

KW - Development

RP - NOT IN FILE

SP - 65

EP - 75

JF - Child Welfare: Journal of Policy, Practice, and Program

VL - 72:

IS - 1

N2 - Homeless children face dangers to their development and self-esteem. Taking advantage of the opportunity offered by the gathering together in shelters of many high-risk families, an on-site social worker can make needed services accessible to parents and children. Play therapy, available on a flexible schedule to young children in small groups or individually, can address crises and long-term growth, helping to increase self-esteem, improve interpersonal skills, and restore relatedness. Empowering siblings to accept and nurture each other can help counteract isolation and interrupt destructive intergenerational cycles. Descriptions of interactions of families with different numbers of siblings illustrates how play therapy can be effective in addressing children's social and psychological needs. (PsycINFO Database Record (c) 2012 APA, all rights reserved)

SN - 0009-4021

AD - Hunter, Linda B.: Queen Lili'uokalani Children's Ctr, HI, US

ER -

TY - JOUR

ID - 846

T1 - The art of communicating with vulnerable children

A1 - Dale, Francis

Y1 - 1992///

N1 - Book: 1993-97901-010

English

Book; Edited Book

KW - PsycInfo

KW - At Risk Populations

KW - Interpersonal Communication

KW - Psychotherapeutic Processes

KW - Child Abuse

KW - Mental Disorders

KW - Play Therapy

RP - NOT IN FILE

SP - 185

EP - 209

JF - Varma, Ved Prakash [Ed]

VL - :

IS - 1992

N2 - (create) Examines the factors associated with communicating with children who are vulnerable to mental disorders and abuse, focusing on communication within the psychotherapeutic setting. Illustrates the communicative process through the case example of play therapy with a 7-yr-old boy. (from the chapter) barriers to communication / levels of communication [hearing the child, the therapeutic alliance, the initial contact, explaining and providing context, the therapeutic setting] / different forms of communication / communicating through play / primitive forms of communication (PsycINFO Database Record (c) 2012 APA, all rights reserved)

AD - Dale, Francis: Principal Child Psychotherapist, England

ER -

TY - JOUR

ID - 847

T1 - Risk-taking/gambling-like behavior in preschool children

A1 - Kearney, Christopher A.

Y1 - 1992///

N1 - Peer Reviewed Journal: 1993-05187-001

English

Journal; Peer Reviewed Journal

KW - PsycInfo

KW - Gambling

KW - Imitation (Learning)

KW - Risk Taking

KW - Social Learning

RP - NOT IN FILE

SP - 287

EP - 297

JF - Journal of Gambling Studies

VL - 8:

IS - 3

N2 - Examines social learning as a potential etiological factor of risk-taking behavior. Prior to playing a risk-taking game, 5 boys and 5 girls (aged 4-5 yrs) were exposed to a peer model who had ostensibly won a large prize, whereas 6 boys and 5 girls of similar age (controls) were exposed to a peer model who had won nothing. Ss in the experimental group initiated more risks to win the large prize in a high-risk situation than did children in the control group, indicating that modeling can enhance risk-taking behavior in young children. (PsycINFO Database Record (c) 2012 APA, all rights reserved)

SN - 1050-5350

AD - Kearney, Christopher A.: U Nevada, Las Vegas, US

ER -

TY - JOUR

ID - 848

T1 - The aggressive tendencies in small children: A checklist for determining aggressive behavior in free play situations. [Italian]

A1 - Venuti, Paola

Y1 - 1992///

N1 - Peer Reviewed Journal: 1992-88718-001

Italian

Journal; Peer Reviewed Journal

KW - PsycInfo

KW - Aggressive Behavior

KW - Behavioral Assessment

KW - Childhood Play Behavior

RP - NOT IN FILE

SP - 101

EP - 109

JF - Eta Evolutiva

VL - 41 Feb 1992, pp. 101-109.

N2 - Discusses the use of a children's behavior checklist to categorize and assess types of activity, risk situations, and aggressive behavior vs nonaggressive behavior. (PsycINFO Database Record (c) 2012 APA, all rights reserved)

SN - 0392-0658

AD - Venuti, Paola: U degli Studi Padua, Italy

ER -

TY - JOUR

ID - 849

T1 - A social partnership model for assessing early communication development: An intervention model for preconversational children

A1 - MacDonald, James D.

Y1 - 1992///

N1 - Peer Reviewed Journal: 1992-35930-001

English

Journal; Peer Reviewed Journal

KW - PsycInfo

KW - Delayed Development

KW - Early Intervention

KW - Interpersonal Communication

KW - At Risk Populations

KW - Language Delay

KW - Models

RP - NOT IN FILE

SP - 113

EP - 124

JF - Language, Speech, and Hearing Services in Schools

VL - 23:

IS - 2

N2 - Presents a model for assessing the interactive sources of communication development, which focuses on the reciprocal behaviors of adults and children as communication evolves from natural play, learning, and caregiving. The model integrates theoretical and empirical findings from a wide range of studies of the development of 1st relationships and is designed for parallel diagnostic and treatment purposes. The rationale and case illustrations are provided of the 5 developmental stages addressed by the model: social play, turn taking, nonverbal communication, language, and conversation. (PsycINFO Database Record (c) 2012 APA, all rights reserved)

SN - 0161-1461

AD - MacDonald, James D.: Ohio State U, Nisonger Ctr, Columbus, US

ER -

TY - JOUR

ID - 851

T1 - Maternal depression and locus of control orientation as predictors of dyadic play behavior

A1 - Houck,Gail M.

Y1 - 1991///

N1 - Peer Reviewed Journal: 1992-27441-001

English

Journal; Peer Reviewed Journal

KW - PsycInfo

KW - Childhood Play Behavior

KW - Internal External Locus of Control

KW - Major Depression

KW - Mother Child Relations

KW - Adolescent Mothers

KW - Mothers

RP - NOT IN FILE

SP - 347

EP - 360

JF - Infant Mental Health Journal

VL - 12:

IS - 4

N2 - Examined maternal locus of control orientation and depression in relation to joint negotiation and coordination of mother-child play at 20 mo. Ss were 51 high-social-risk mothers (aged 15-32 yrs) and children. Mothers completed Rotter's Internal-External Locus of Control Scale and the Beck Depression Inventory prenatally and at 20 mo; mother-child interaction was videotaped in a laboratory playroom at 20 mo. Tapes were coded to evaluate maternal control and sensitivity and child engagement and autonomy. Analyses of dyadic play behavior indicated that maternal controllingness was related to an external locus of control orientation. Child engagement during play was related to the resolution of mild maternal depression. (French, Spanish & Japanese abstracts) (PsycINFO Database Record (c) 2012 APA, all rights reserved)

SN - 0163-9641

AD - Houck, Gail M.: Oregon Health Sciences U, School of Nursing, Portland, US

ER -

TY - JOUR

ID - 852

T1 - Adolescent and adult mothers of handicapped children: Maternal involvement in play. [References]

A1 - Helm,James M.

Y1 - 1990///

N1 - Peer Reviewed Journal: 2001-09132-009

English

Journal; Peer Reviewed Journal

KW - PsycInfo

KW - Childhood Play Behavior

KW - Disorders

KW - Mother Child Relations

KW - Parental Attitudes

KW - Social Support

KW - Adolescent Mothers

KW - At Risk Populations

KW - Internal External Locus of Control

KW - Social Interaction

RP - NOT IN FILE

SP - 432

EP - 437

JF - Family Relations: An Interdisciplinary Journal of Applied Family Studies

VL - 39:

IS - 4

N2 - This study examines maternal involvement of adolescent (aged 14-19 yrs) and adult (aged 20-42 yrs) mothers with their handicapped and at-risk preschool children. Consistent with the literature on mothers of normally developing children, results indicate adolescent mothers of handicapped and at-risk children are rated as significantly less contingent and verbal, and provide a less positive affective climate than adult mothers. Regression techniques indicate perceived social support and locus of control were significant predictors of maternal involvement for adolescent and adult mothers respectively. (PsycINFO Database Record (c) 2012 APA, all rights reserved)

SN - 0197-6664

AD - Helm, James M.: North Carolina U, School of Medicine, NC, US

ER -

TY - JOUR

ID - 853

T1 - The Waterloo Longitudinal Project: Correlates and consequences of social withdrawal in childhood

A1 - Rubin, Kenneth H.

Y1 - 1990///

N1 - Peer Reviewed Journal: 1990-25024-001

English

Journal; Peer Reviewed Journal

KW - PsycInfo

KW - At Risk Populations

KW - Childhood Development

KW - Social Isolation

KW - Longitudinal Studies

RP - NOT IN FILE

SP - 73

EP - 90

JF - Infancia y Aprendizaje / Journal for the Study of Education and Development

VL - 49 1990, pp. 73-90.

N2 - Examined the risk status of childhood social withdrawal (CSW), using data from a longitudinal project that followed 77 children between the ages of 5 and 11 yrs. Younger Ss were observed in free play with their peers, and older Ss were evaluated using a class play method of peer assessment. CSW was relatively stable in the early school years and was associated with loneliness, nonclinical depression, and negative self-perceptions of competence in later childhood. Regarding development, children may arrive at a given "outcome" in different ways. Although some isolated and rejected children may be at risk for subsequent externalizing difficulties, others may be more at risk for later internalizing problems. (Spanish abstract) (PsycINFO Database Record (c) 2012 APA, all rights reserved)

SN - 0210-3702

AD - Rubin, Kenneth H.: U Waterloo, ON, Canada

ER -

TY - JOUR

ID - 855

T1 - Playgrounds at the crossroads: Policy and action research needed to ensure a viable future for public playgrounds in the United States

A1 - Moore, Robin C.

Y1 - 1989///

N1 - Book: 1989-97645-004

English

Book; Edited Book

KW - PsycInfo



KW - Environmental Planning

KW - Playgrounds

KW - Policy Making

KW - Childhood Development

KW - Safety

KW - Social Interaction

RP - NOT IN FILE

SP - 83

EP - 120

JF - Altman, Irwin [Ed]; Zube, Ervin H [Ed]

VL - :

IS - 1989

N2 - (from the chapter) purpose of this chapter is to provide a perspective on the current state of public playgrounds in the United States and to propose research and policy directions to support their improvement as viable places for child development main issues current in the field of practice and arising from a review of the empirical literature are discussed in depth / playground use / safety / play value of different types of setting / adventure play / site planning / characteristics of settings that support social integration (PsycINFO Database Record (c) 2012 APA, all rights reserved)

AD - Moore, Robin C.: North Carolina State U, School of Design, Raleigh, NC, US

ER -

TY - JOUR

ID - 856

T1 - Effects of group socialization procedures on the social interactions of preschool children

A1 - Brown, William H.

Y1 - 1988///

N1 - Peer Reviewed Journal: 1989-20576-001

English

Journal; Peer Reviewed Journal

KW - PsycInfo

KW - Autism

KW - Delayed Development

KW - Emotional Disturbances

KW - Group Instruction

KW - Peer Relations

KW - Preschool Students

KW - SOCIALIZATION

RP - NOT IN FILE

SP - 359

EP - 376

JF - Research in Developmental Disabilities

JA - Res.Dev.Disabil.

VL - 9:

IS - 4

N2 - Investigated the effects of group socialization procedures on the social behavior of preschoolers. Study 1 involved 20 Head Start students (aged 4 yrs 6 mo to 5 yrs 7 mo) with 2 target Ss (a developmentally delayed girl and a normally developing boy). Study 2 involved 17 Ss (aged 3 yrs 8 mo to 5 yrs 5 mo) at risk for handicapping conditions with 2 target Ss (an autistic and an emotionally disturbed boy). Group socialization procedures consisted of teachers using antecedent and consequent events to promote social interaction during children's games. Social behavior was assessed during group game periods (i.e., intervention sessions) and nonintervention play periods (i.e., generalization sessions). In both studies, during group game periods after intervention, target Ss increased their rates of both prompted and unprompted social interactions with peers. In nonintervention play periods, target Ss improved both the rate and the duration of their social responding with peers. (PsycINFO Database Record (c) 2012 APA, all rights reserved)

SN - 0891-4222

AD - Brown, William H.: Vanderbilt U George Peabody Coll for Teachers, Inst of Family & Child Development, Nashville, TN, US  
ER -

TY - JOUR

ID - 857

T1 - Issue-specific play with infants and toddlers in hospitals: Rationale and intervention

A1 - Goldberger,Joy

Y1 - 1988///

N1 - Peer Reviewed Journal: 1989-02788-001

English

Journal; Peer Reviewed Journal

KW - PsycInfo

KW - Emotional Adjustment

KW - Hospitalized Patients

KW - Play Therapy

KW - Primary Mental Health Prevention

KW - At Risk Populations

KW - Family Members

KW - Social Support

RP - NOT IN FILE

SP - 134

EP - 141

JF - Children's Health Care

JA - Child Health Care

VL - 16:

IS - 3

N2 - Discusses planned, systematic play as a necessary facet of emotional and developmental support to hospitalized children (aged from 6 mo to 3 yrs) and their families and suggests categories and methods of issue-specific play interventions. (PsycINFO Database Record (c) 2012 APA, all rights reserved)

SN - 0273-9615

AD - Goldberger, Joy: Johns Hopkins Hosp Children's Ctr, Child Life Dept, Baltimore, MD, US

ER -

TY - JOUR

ID - 858

T1 - The diagnostic and therapeutic roles of children's rough-and-tumble play

A1 - Pellegrini,Anthony D.

Y1 - 1988///

N1 - Peer Reviewed Journal: 1989-02218-001

English

Journal; Peer Reviewed Journal

KW - PsycInfo

KW - Aggressive Behavior

KW - Childhood Play Behavior

KW - Play Therapy

KW - Psychodiagnosis

KW - At Risk Populations

KW - Health Care Services

KW - Physical Contact

RP - NOT IN FILE

SP - 162

EP - 168

JF - Children's Health Care

JA - Child Health Care

VL - 16:

IS - 3

N2 - Outlines the diagnostic and therapeutic roles of children's rough-and-tumble play (R&T). The diagnostic role of R&T is explicated by discussing a study of elementary school children's R&T and aggression. It is argued that observing R&T and aggression can help health care providers in predicting and preventing antisocial behaviors. Strategies for remediating children's aggressive play that are appropriate for home- or hospital-based intervention programs are described. (PsycINFO Database Record (c) 2012 APA, all rights reserved)

SN - 0273-9615

AD - Pellegrini, Anthony D.: U Georgia, Inst for Behavioral Research, Athens, US

ER -

TY - JOUR

ID - 860

T1 - Parental involvement in play interaction and caregiving roles in families with young high risk and handicapped children: A comparison of father and mother

A1 - Comfort, Marilee

Y1 - 1987///

N1 - Dissertation Abstract: 1988-54782-001

English

Dissertation Abstract

KW - PsycInfo

KW - At Risk Populations

KW - Childhood Play Behavior

KW - Parent Child Relations

KW - Parental Attitudes

KW - Parents

KW - Intellectual Development Disorder

RP - NOT IN FILE

SP - 627

JF - Dissertation Abstracts International

VL - 48:

IS - 3-A

SN - 0419-4217

AD - Comfort, Marilee: U North Carolina, Chapel Hill, US

ER -

TY - JOUR

ID - 861

T1 - Cognitive processes of at-risk and typically developing infants: Comparison of exploration, play, and problem solving

A1 - Cannella, Gaile S; Berkeley, Terry

Y1 - 1987///

N1 - Peer Reviewed Journal: 1988-19660-001

English

Journal; Peer Reviewed Journal

KW - PsycInfo

KW - At Risk Populations

KW - Childhood Play Development

KW - Cognitive Development

KW - Exploratory Behavior

KW - Problem Solving

RP - NOT IN FILE

SP - 269

EP - 286

JF - Child Study Journal

VL - 17:

IS - 4

N2 - Observed assimilation and accommodation with novel objects for 12 infants identified as mildly at-risk and 10 intellectually average (typical) infants (aged 8-18 mo). Typical Ss exhibited greater problem solving skills, whereas play behaviors were similar for both groups. Exploration and play were positively related to problem solving for the at-risk Ss and negatively related for the typical Ss. Behavior of younger and older typical Ss revealed a developmental progression from decreasing exploration to greater amounts of play. At-risk Ss did not follow this pattern; both types of activities increased with age. It is suggested that, although at-risk infants are capable of developing higher levels of equilibrium, they need more exploration time to construct cognitive schema. (PsycINFO Database Record (c) 2012 APA, all rights reserved)

SN - 0009-4005

AD - Cannella, Gaile S.: St John's U, Jamaica, NY, US

ER -

TY - JOUR

ID - 862

T1 - Learning mathematics and science through play

A1 - Henniger, Michael L.

Y1 - 1987///

N1 - Peer Reviewed Journal: 1988-18386-001

English

Journal; Peer Reviewed Journal

KW - PsycInfo

KW - Childhood Play Behavior

KW - Mathematics Education

KW - Science Education

KW - Academic Achievement Motivation

KW - Divergent Thinking

KW - Elementary School Students

KW - Preschool Students

KW - Teaching Methods

RP - NOT IN FILE

SP - 167

EP - 171

JF - Childhood Education

VL - 63:

IS - 3

N2 - Presents examples of learning opportunities in science and mathematics available through children's play. Attitudes essential to learning in these disciplines that are developed through the opportunity to explore and create in a low-risk situation are described, including intellectual curiosity, willingness to engage in divergent thinking, and motivation to learn. (PsycINFO Database Record (c) 2012 APA, all rights reserved)

SN - 0009-4056

AD - Henniger, Michael L.: Central Washington U, Ellensburg, US

ER -

TY - JOUR

ID - 863

T1 - Impact of premature birth on the development of the infant in the family. [References]

A1 - Macey, Terri J.

Y1 - 1987///

N1 - Peer Reviewed Journal: 1988-14344-001

English

Journal; Peer Reviewed Journal

KW - PsycInfo

KW - Attachment Behavior

KW - Childrearing Practices

KW - Family Relations

KW - Mother Child Relations

KW - Premature Birth

KW - Cognitive Development

KW - Hospitalization

KW - Social Behavior

RP - NOT IN FILE

SP - 846

EP - 852

JF - Journal of Consulting and Clinical Psychology

VL - 55:

IS - 6

N2 - This article describes effects of the birth of a premature infant on the family system and focuses on how problems associated with premature birth such as infant illness, hospitalization, and immaturity can place the family at risk. New data are presented describing differences in the behavior of preterm and full-term infants and in the feelings of mothers toward their infants at 12 months. Mothers of preterm infants reported feeling overprotective toward them, were less willing to leave them with sitters, and believed that their birth had an initially negative effect on the family. Preterm infants showed less exploratory play and stayed closer to their mothers during free play. The fact that these differences are not reflected in patterns of attachment, a key measure of the mother-infant relationship, is discussed. (PsycINFO Database Record (c) 2012 APA, all rights reserved)

SN - 0022-006X

AD - Macey, Terri J.: U Colorado Health Sciences Ctr, Denver, US

ER -

TY - JOUR

ID - 864

T1 - Childhood gender identity change: Operant control over sex-typed play and mannerisms

A1 - Rekers, George A.

Y1 - 1976///

N1 - Peer Reviewed Journal: 1976-28418-001

English

Journal; Peer Reviewed Journal

KW - PsycInfo

KW - Case Report

KW - Human Males

KW - Operant Conditioning

KW - Psychosexual Behavior

KW - Transsexualism

KW - Behavior Therapy

KW - Sex Roles

RP - NOT IN FILE

SP - 51

EP - 57

JF - Journal of Behavior Therapy and Experimental Psychiatry

VL - 7:

IS - 1

N2 - Presents what is thought to be the 1st case of a successful change of childhood gender identity that is documented by pre- and postdiagnostic assessment procedures. Deviant sex-typed behaviors were modified in a 5-yr-old boy judged by an independent clinician to be a high risk for adult transsexualism. In Study 1, the child's mother was trained to reinforce "masculine" play behaviors and to extinguish "feminine" play behaviors in the clinic. This intra-S study introduced new procedures designed to maximize the generalization of the treatment effect to play in the alone condition. Study 2 was designed to modify the child's cross-gender mannerisms through the use of a response-cost and verbal prompt procedure. The cross-gender mannerism "flexed elbow" decreased as a function of the treatment. At the follow-up 25 mo after treatment, evaluation by an independent clinician indicated the therapeutic change to a male gender identity. (46 ref) (PsycINFO Database Record (c) 2013 APA, all rights reserved)

SN - 0005-7916

AD - Rekers, George A.: Fuller Theological Seminary, Graduate School of Psychology, Pasadena, CA  
ER -

TY - JOUR

ID - 865

T1 - A study of the gross motor skills of cerebral palsied children in an adventure playground for handicapped children

A1 - Levitt,Sophie

Y1 - 1975///

N1 - Peer Reviewed Journal: 1976-24356-001

English

Journal; Peer Reviewed Journal

KW - PsycInfo

KW - Cerebral Palsy

KW - Childhood Play Development

KW - Motor Skills

KW - Play Therapy

KW - Playgrounds

RP - NOT IN FILE

SP - 29

EP - 43

JF - Child: Care, Health and Development

VL - 1:

IS - 1

N2 - Studied the play of 29 handicapped children (diagnoses included spastic quadriplegia, diplegia, triplegia, hemiplegia, athetoid quadriplegia, and ataxia) in an adventure playground in order to (a) investigate the relationship between therapy and its practical application in play and (b) examine how the playground can contribute to therapy. Results show that Ss did not take advantage of the opportunities in the playground to cover the full scope of their established motor skills. The behavior of adults, attitudes of the children, and the design of the playground and equipment are discussed as possible reasons for this finding. (PsycINFO Database Record (c) 2012 APA, all rights reserved)

SN - 0305-1862

AD - Levitt, Sophie: Wolfson Ctr, London, England

ER -

TY - JOUR

ID - 866

T1 - Children in four neighborhoods: The physical environment and its effect on play and play patterns

A1 - Berg,Mary

Y1 - 1980///

N1 - Peer Reviewed Journal: 1980-32305-001

English

Journal; Peer Reviewed Journal

KW - PsycInfo

KW - Childhood Play Behavior

KW - Environmental Effects

KW - Neighborhoods

KW - Recreation Areas

KW - Urban Planning

KW - Safety

KW - Social Interaction

KW - Socioeconomic Status

KW - Topography

RP - NOT IN FILE

SP - 320

EP - 348

JF - Environment and Behavior

VL - 12:

IS - 3

N2 - Compared children's play patterns across neighborhoods of different social status, terrains, levels of access to play space, and levels of municipally provided after-school services. In a California city, 764 11-12 yr olds were interviewed in their homes, while their parents completed a questionnaire that probed socialization priorities and childrearing practices affecting aspects of out-of-school life. It is argued that few neighborhoods are designed with the needs of young people in mind. By examining how children's play patterns in 4 neighborhoods are constrained or facilitated by the terrain, by the availability of "managed" and "unmanaged" play space, and by play problems associated with questions of safety and mobility, it is possible to see how planning and land-use decisions affect the everyday experience of the young. (29 ref) (PsycINFO Database Record (c) 2012 APA, all rights reserved)

SN - 0013-9165

AD - Berg, Mary: U California Schools of Law & Education, Berkeley

ER -

TY - JOUR

ID - 867

T1 - Children's play and urban playground environments: A comparison of traditional, contemporary, and adventure playground types

A1 - Hayward,D.

Y1 - 1974///

N1 - Peer Reviewed Journal: 1975-09396-001

English

Journal; Peer Reviewed Journal

KW - PsycInfo

KW - Playgrounds

KW - Recreation

KW - Social Interaction

RP - NOT IN FILE

SP - 131

EP - 168

JF - Environment and Behavior

VL - 6:

IS - 2

N2 - Studied children's activities and interactions in 3 playgrounds: a traditional equipment playground, a contemporary-design playground, and an adventure playground (which supplies play material, not play equipment). Observation, interviews, behavioral mapping, and behavior setting records were employed. The playgrounds had different predominant user groups, different patterns of use of areas and equipment, and different roles for and participation by play setting supervisors. Adults and preschoolers predominated at the traditional and contemporary playgrounds; 6-13 yr olds predominated at the adventure play area. At the 2 prebuilt playgrounds, use focused on the equipment, whereas at the adventure playground interactive play was common. The atmosphere of the playgrounds and the activities of users were shaped by a variety of factors, including opportunities and constraints of the physical environment, social influences, and freedom to make use of available opportunities. Information on users' choices and opinions relative to opportunities and freedom is presented, and implications for research and planning are discussed. (PsycINFO Database Record (c) 2012 APA, all rights reserved)

SN - 0013-9165

AD - Hayward, D. Geoffrey: Graduate School & University Ctr, City U New York

ER -

TY - JOUR

ID - 868

T1 - Social competence and children's sociometric status: The role of peer group entry strategies

A1 - Dodge,Kenneth A.

Y1 - 1983///

N1 - Peer Reviewed Journal: 1984-01060-001

English

Journal; Peer Reviewed Journal

KW - PsycInfo

KW - Peer Relations

KW - Social Approval

KW - Social Skills

KW - Status

RP - NOT IN FILE

SP - 309

EP - 336

JF - Merrill-Palmer Quarterly

VL - 29:

IS - 3

N2 - In Study 1, 50 popular, rejected, and neglected kindergartners were asked to initiate play with 2 same-age peers. In Study 2, naturally occurring peer group entry episodes were observed among 56 popular, rejected, neglected, average, and controversial 2nd-grade boys who were involved in free play. Observations of video records of these episodes revealed that the status groups differed in the frequency of their attempts at peer group entry, the probability of success of their attempts, and the behaviors that they used during entry. The entry behaviors were conceptualized and coded as tactics used by Ss to complete the task of entry. Successful entry attempts involved sequences of tactics that progressed from the use of low-risk tactics (such as waiting and hovering) to the use of high-risk tactics (such as statements and requests), while maintaining the frame of reference of the group. Findings are integrated with previous research to generate a model of social competence in children's peer-group entry behavior. (30 ref) (PsycINFO Database Record (c) 2012 APA, all rights reserved)

SN - 0272-930X

AD - Dodge, Kenneth A.: Indiana U, Bloomington

ER -

TY - JOUR

ID - 869

T1 - Risk-taking needs in children: An accommodating play environment

A1 - Jambor, Tom

Y1 - 1986///

N1 - Peer Reviewed Journal: 1989-21891-001

English

Journal; Peer Reviewed Journal

KW - PsycInfo

KW - Childhood Play Behavior

KW - Environmental Planning

KW - Playgrounds

KW - Risk Taking

RP - NOT IN FILE

SP - 22

EP - 25

JF - Children's Environments Quarterly

VL - 3:

IS - 4

N2 - Describes a play environment designed to acknowledge children's risk-taking needs. The playground, developed in a natural setting in Norway, was intended to allow children of various ages to participate at their own levels of ability in play involving decision making and social interaction. (PsycINFO Database Record (c) 2012 APA, all rights reserved)

SN - 0886-0505

AD - Jambor, Tom: U Alabama, School of Education, Birmingham, US

ER -

TY - JOUR



ID - 870

T1 - The influence of model infant-toddler group care on parent-child interaction at home

A1 - Edwards, Carolyn P.

Y1 - 1986///

N1 - Peer Reviewed Journal: 1988-13561-001

English

Journal; Peer Reviewed Journal

KW - PsycInfo

KW - Child Day Care

KW - Childhood Play Development

KW - Parent Child Relations

KW - Safety

RP - NOT IN FILE

SP - 317

EP - 332

JF - Early Childhood Research Quarterly

VL - 1:

IS - 4

N2 - Assessed the effects of daycare participation on parent-child interaction at home using a university-based, half-day model infant-toddler program with 38 2-22 mo olds and their parents (aged 21-42 yrs). Hypotheses concerned whether child-centered features of the physical and social environment were carried over by parents to the home. 19 matched pairs of center and noncenter children were followed for 8 mo. Parents showed few group differences during the 1st half of the study period. At study end, however, center homes were more child-centered with respect to play, safety, and dinner arrangements. Center parents scored higher in proximity and warmth and lower in teacher-avoided behaviors. Noncenter parents at study end scored higher in authority (limit setting) and communicating values and labels. (PsycINFO Database Record (c) 2012 APA, all rights reserved)

SN - 0885-2006

AD - Edwards, Carolyn P.: U Massachusetts School of Education, Amherst, US

ER -

TY - JOUR

ID - 871

T1 - Age-appropriateness and safety of a home merry-go-round for young children

A1 - Ridenour, Marcella V.

Y1 - 1986///

N1 - Peer Reviewed Journal: 1987-30974-001

English

Journal; Peer Reviewed Journal

KW - PsycInfo

KW - Age Differences

KW - Home Environment

KW - Playgrounds

KW - Safety

KW - Toys

RP - NOT IN FILE

SP - 271

EP - 278

JF - Perceptual and Motor Skills

VL - 63:

IS - 1

N2 - Summarized the guidelines for age-labeling of children's toy and playgrounds and compared home and public playground standards for the design of merry-go-rounds (MGRs). An investigation of home MGRs with 120 3-6 yr olds found that Ss had the motor and social interaction skills to operate a 2-person home MGR. Although the Ss were able to rotate the MGR successfully, a potential hazard was identified. (PsycINFO Database Record (c) 2012 APA, all rights reserved)

SN - 0031-5125

AD - Ridenour, Marcella V.: Temple U, Biokinetics Research Lab  
ER -

TY - JOUR

ID - 873

T1 - Mother-child and father-child play

A1 - Roopnarine, Jaipaul L.

Y1 - 1985///

N1 - Peer Reviewed Journal: 1998-01826-004

English

Journal; Peer Reviewed Journal

KW - PsycInfo

KW - Childhood Play Behavior

KW - Fantasy

KW - Human Sex Differences

KW - Parent Child Relations

KW - Vocabulary

KW - Fathers

KW - Mothers

RP - NOT IN FILE

SP - 157

EP - 169

JF - Early Child Development and Care

VL - 20:

IS - 2-3

N2 - Examined parental initiations of fantasy with their preschool-aged sons and daughters and the relationship between the fantasy play initiations of parents and their children's receptive vocabulary skills. 36 mother-father-child triads (aged 25-45 yrs, aged 27-59 yrs, and aged 46-60 mo, respectively) participated. Parents interacted with their children for 10 minutes, and activities were coded as fantasy play (domestic or adventure themes), rough play, and joint positive. Results show that mothers were more likely to initiate fantasy and joint positive play compared to fathers, while fathers were more likely to initiate rough play compared to mothers. With one exception, mothers initiating more joint positive play with daughters than with sons, parental treatment of sons and daughters was very similar. (PsycINFO Database Record (c) 2012 APA, all rights reserved)

SN - 0300-4430

AD - Roopnarine, Jaipaul L.: Syracuse U, Dept of Child, Family & Community Studies, Syracuse, NY, US

ER -

TY - JOUR

ID - 874

T1 - A cross-setting assessment of family interaction and the prediction of school competence in children at risk

A1 - Cole, Robert E; Al-Khayyal, Manhal; Baldwin, Alfred

Y1 - 1984///

N1 - Book: 1997-36499-030

English

Book; Edited Book

KW - PsycInfo

KW - Academic Achievement

KW - At Risk Populations

KW - Family Relations

KW - Mental Disorders

KW - Offspring

KW - Childhood Play Behavior

KW - Parental Characteristics

KW - Recreation

KW - Rorschach Test

KW - Sons

RP - NOT IN FILE

SP - 388

EP - 392

JF - Watt, Norman F [Ed]; Anthony, E

VL - James [Ed]; Wynne, Lyman C [Ed]; Rolf, Jon E [Ed]. :

IS - 1984

N2 - (from the chapter) The development of a friendly, outgoing interpersonal style depends in part on behavior modeled upon and rewarded by a child's family. An examination of the frequency, reciprocity, and warmth of social interaction in families with children at risk for psychiatric disorders should help us understand why some of the children in our study of 4-, 7-, and 10-yr-old sons with 1 parent having schizophrenia, affective psychosis, or nonpsychotic mental disorders are more competent than others. The sample comes from the University of Rochester Child and Family Study (URCAFS). The URCAFS Project had a number of opportunities to observe our S families working and playing together. This includes both structured and unstructured tasks that involve various constellations of family members. This report presents some of the data from 2 of these tasks, the Free Play and the Family Rorschach. The Free Play is an unstructured task in which a subgroup of the family, the mother, father, and index child are asked to play together for 30 min as they might at home. The Consensus Rorschach is a structured task conducted in 2 phases, first with the marital pair, then with the whole family. In the first phase, the Spouse Rorschach, the parents, while alone, are given a Rorschach card and are asked to examine the card and reach a consensus about what the card looks like to them. Having completed this task, the parents are then instructed to explain the task to the children and to achieve consensus, as a family, about what a new card looks like. Thus, the Family Rorschach, the 2nd phase, includes clearly structured tasks: (1) parents teach the children; (2) family members solicit responses from 1 another; (3) family reaches consensus. The combined data from 2 such different settings provide a much more complete understanding of interaction in families than do data from only 1 setting and improve our predictions of how the children in these families will perform in school. (PsycINFO Database Record (c) 2012 APA, all rights reserved)

AD - Cole, Robert E.: U Rochester, Medical Ctr, Rochester, NY, US

ER -

TY - JOUR

ID - 875

T1 - Free Play family interaction and the behavior of the patient in Free Play

A1 - Baldwin, Clara P.

Y1 - 1984///

N1 - Book: 1997-36499-029

English

Book; Edited Book

KW - PsycInfo

KW - At Risk Populations

KW - Mental Disorders

KW - Offspring

KW - Parent Child Relations

KW - Recreation

KW - Affection

KW - Major Depression

KW - Parental Characteristics

KW - Psychosis

KW - Schizophrenia

KW - Sons

RP - NOT IN FILE

SP - 376

EP - 387

JF - Watt, Norman F [Ed]; Anthony, E

VL - James [Ed]; Wynne, Lyman C [Ed]; Rolf, Jon E [Ed]. :

IS - 1984

N2 - (from the chapter) Discussed the general features of the family interaction in the Free Play situation: the high rate of interaction with the child, and general predominance of parental initiations in the parent-child

interaction, the high correlation among all dyads on warmth. This led to the selection of 3 variables for study, rate of patient-child interaction, proportion of parental initiations to the child, and family warmth in at risk 4-, 7-, and 10-yr-old sons who have at least 1 parent with schizophrenia vs affective psychotics vs nonpsychotics. This population was taken from the University of Rochester Child and Family Study. Results suggest that: (1) there are major differences in family interaction depending on the age of the child; (2) the patient's rate of interaction with the child and proportion of interaction is lower than the spouse's rate (this holds for the 4- and 10-yr-olds separately but not for the 7-yr-olds); (3) the rate of patient-child interaction is highest for nonpsychotics, lower for affective psychotics, and least for schizophrenics; (4) patients with a low Global Assessment Score (GAS) have lower rates and lower proportions of interaction with their children and less warmth than patients with a higher GAS; and (5) patients who have been recently hospitalized have a lower rate than those hospitalized longer ago. (PsycINFO Database Record (c) 2012 APA, all rights reserved)

AD - Baldwin, Clara P.: U Rochester, Rochester, NY, US

ER -

TY - JOUR

ID - 876

T1 - Influence of inter-rung distance on self-prediction and success

A1 - Ridenour, Marcella V.

Y1 - 1983///

N1 - Peer Reviewed Journal: 1984-03735-001

English

Journal; Peer Reviewed Journal

KW - PsycInfo

KW - Jumping

KW - Motor Performance

KW - Playgrounds

KW - Prediction

KW - Safety

RP - NOT IN FILE

SP - 751

EP - 754

JF - Perceptual and Motor Skills

VL - 56:

IS - 3

N2 - 19 6-yr-old boys participated in a 2-part experiment on horizontal inter-rung distance. The 1st part was limited to self-prediction, and in the 2nd part Ss were asked to use a hanging-swing movement between pairs of horizontal rungs separated by 24-59 in. Analysis of videotapes indicated rung distance did not affect the accuracy of self-prediction, but it did influence success on the task and frequency of jumping. The percentage of successful trials decreased and the frequency of jumping movements increased with greater inter-rung distances. Results indicate that 6-yr-old boys have excellent self-prediction skills that are sometimes accompanied by poor and potentially hazardous movement choices. Implications for playground safety are discussed. (4 ref) (PsycINFO Database Record (c) 2012 APA, all rights reserved)

SN - 0031-5125

AD - Ridenour, Marcella V.: Temple U, Biokinetics Research Lab

ER -

TY - JOUR

ID - 877

T1 - Promoting social integration of young children at risk for learning disabilities

A1 - Odom, Samuel L.

Y1 - 1982///

N1 - Peer Reviewed Journal: 1983-08950-001

English

Journal; Peer Reviewed Journal

KW - PsycInfo

KW - Curriculum

KW - Mainstreaming (Educational)

KW - Predisposition

KW - Social Interaction

KW - Disorders

KW - Preschool Students

KW - Special Education

RP - NOT IN FILE

SP - 379

EP - 387

JF - Learning Disability Quarterly

VL - 5:

IS - 4

N2 - The Integrated Preschool Curriculum (IPC), designed to facilitate the social integration of young children at risk for learning disabilities into mainstreamed and integrated special education classes, was compared with a standard early childhood education model curriculum. Social interaction data during play were collected for 4 integrated and 2 nonintegrated special education classes (56 handicapped and 16 nonhandicapped Ss). Ss in the IPC classes exhibited significantly greater proportions of interactive and proximity play, while those in the contrast classes engaged in significantly greater proportions of isolate play. In the integrated classes implementing the IPC, a significantly greater proportion of the nonhandicapped Ss' interactive play involved handicapped Ss as compared to the integrated classes employing the contrast curriculum. In the IPC classes, handicapped Ss played with their nonhandicapped peers more often. Data indicate that the IPC successfully promoted social interaction between handicapped and nonhandicapped Ss in integrated special education classes. (42 ref) (PsycINFO Database Record (c) 2012 APA, all rights reserved)

SN - 0731-9487

AD - Odom, Samuel L.: U Pittsburgh School of Medicine, Western Psychiatric Inst & Clinic

ER -

TY - JOUR

ID - 878

T1 - Nonsocial play in preschoolers: Necessarily evil?

A1 - Rubin, Kenneth H.

Y1 - 1982///

N1 - Peer Reviewed Journal: 1982-27977-001

English

Journal; Peer Reviewed Journal

KW - PsycInfo

KW - Childhood Play Behavior

KW - Cognitive Ability

KW - Social Isolation

KW - Social Skills

RP - NOT IN FILE

SP - 651

EP - 657

JF - Child Development

JA - Child Dev.

VL - 53:

IS - 3

N2 - It has been suggested that children who play on their own, without interacting with peers, may be at risk for social, cognitive, and social-cognitive problems. Recently, however, the children's play literature has revealed that some forms of nonsocial activity are constructive and adaptive. The present study examined the social, cognitive, and social-cognitive correlates of nonsocial play. 122 4-yr-olds were observed for 20 min during free play. They were also administered a role-taking test, the Preschool Interpersonal Problem-Solving Test, and the Social Problem-Solving Task. Sociometric popularity and social competence (as rated by teachers using the Sociometric Rating Scale and the Preschool Behavior Questionnaire) were also assessed. Analyses indicated that nonsocial-functional (sensorimotor) and dramatic activities generally correlated negatively with

the measures of competence; parallel-constructive activities generally correlated positively with them. (26 ref) (PsycINFO Database Record (c) 2012 APA, all rights reserved)

SN - 0009-3920

AD - Rubin, Kenneth H.: U Waterloo, Canada

ER -

TY - JOUR

ID - 879

T1 - Development of symbolic play: Implications for the language specialist

A1 - McCune-Nicolich, Lorraine; Carroll, Shelley

Y1 - 1981///

N1 - Peer Reviewed Journal: 1982-25495-001

English

Journal; Peer Reviewed Journal

KW - PsycInfo

KW - Childhood Play Development

KW - Early Intervention

KW - Language Development

KW - Language Disorders

KW - Predisposition

RP - NOT IN FILE

SP - 1

EP - 15

JF - Topics in Language Disorders

VL - 2:

IS - 1

N2 - Discusses the development of symbolic play and language in preschool children in terms of the Piagetian transition from sensorimotor to representational thought. The development of early symbolization is reflected by the gradual separation of meaning from action and the integration of symbolic behaviors or meanings in sequences. The next step of this development is the ability to extend pretending beyond the child's own actions and experience. The symbolic play and language skills developed in the last 2 yrs form the basis of the more sophisticated sociodramatic play of the preschool and school-age child. Each of these stages is described in terms of the use of objects, prelanguage and language communication, and themes and roles. Child-centered play can provide both the context and the material for assessment and intervention with language-impaired and at-risk children as old as 5 yrs. Sociodramatic play with older children can lead to gains in both linguistic and social competence and can be adapted to various language intervention goals. (43 ref) (PsycINFO Database Record (c) 2012 APA, all rights reserved)

SN - 0271-8294

AD - McCune-Nicolich, Lorraine: Rutgers U Graduate School of Education, Graduate Faculty of Psychology, New Brunswick

ER -

TY - JOUR

ID - 880

T1 - The Children's Developmental Play Program: Physical activity designed to facilitate the growth and development of mildly handicapped children

A1 - Roswal, Glenn

Y1 - 1980///

N1 - Peer Reviewed Journal: 1981-31304-001

English

Journal; Peer Reviewed Journal

KW - PsycInfo

KW - Individualized Instruction

KW - Motor Skills

KW - Physical Activity

KW - Risk Taking

KW - Self Concept

KW - Disorders

KW - Physical Education

KW - Special Education

RP - NOT IN FILE

SP - 322

EP - 324

JF - Education & Training of the Mentally Retarded

VL - 15:

IS - 4

N2 - Describes a program that utilizes a fun approach to individualizing physical activities for developmentally disabled children. The fundamental concept is predicated on encouraging such children to master fine and gross motor skills while simultaneously improving their self-concept and optimizing risk-taking behaviors. The efficacy and significance of such a program is addressed. (12 ref) (PsycINFO Database Record (c) 2012 APA, all rights reserved)

SN - 0013-1237

AD - Roswal, Glenn: Jacksonville State U

ER -

TY - JOUR

ID - 881

T1 - The effects of a children's developmental play program on the self-concept, risk-taking, and motor proficiency of exceptional children

A1 - Roswal, Glenn M.

Y1 - 1979///

N1 - Dissertation Abstract: 1980-72861-001

English

Dissertation Abstract

KW - PsycInfo

KW - Childhood Play Behavior

KW - Gifted

KW - Psychomotor Development

KW - Risk Taking

KW - Self Concept

KW - Educational Programs

KW - Special Education

RP - NOT IN FILE

SP - 3189

JF - Dissertation Abstracts International

VL - 40:

IS - 6-A

SN - 0419-4217

AD - Roswal, Glenn M.: U Maryland

ER -

TY - JOUR

ID - 882

T1 - Games parents play with normal and high-risk infants

A1 - Field, Tiffany M.

Y1 - 1979///

N1 - Peer Reviewed Journal: 1979-33971-001

English

Journal; Peer Reviewed Journal

KW - PsycInfo

KW - Games

KW - Parent Child Relations

KW - Parents

KW - Predisposition

RP - NOT IN FILE

SP - 41

EP - 48

JF - Child Psychiatry and Human Development

VL - 10:

IS - 1

N2 - Game playing during early infant-parent interactions provided a context for learning conversational turntaking and contingent responsivity. The types and frequency of "universally" recognized infant games were observed during face-to-face interactions of 20 normal (i.e., term delivery) and 40 high risk (i.e., 20 preterm and 20 postterm) infant-parent dyads when the infants were 4 mo old. Approximately 6 different games were played for approximately 31% of the interaction time. Except during interactions with normal male infants mothers and fathers played games equally often. The high-risk infant-parent dyads engaged in game playing less frequently than the normal infant-parent dyads. These differences are discussed in the context of the high-risk infants being "difficult" babies and relatively less responsive. (16 ref) (PsycINFO Database Record (c) 2012 APA, all rights reserved)

SN - 0009-398X

AD - Field, Tiffany M.: U Miami School of Medicine, Mailman Ctr for Child Development, FL

ER -

TY - JOUR

ID - 883

T1 - Infant day care as a treatment intervention: A follow-up comparison study

A1 - Resch,Ruth C.

Y1 - 1977///

N1 - Peer Reviewed Journal: 1978-08397-001

English

Journal; Peer Reviewed Journal

KW - PsycInfo

KW - Child Day Care

KW - Childhood Play Development

KW - Infant Development

KW - Predisposition

KW - Psychopathology

KW - Followup Studies

KW - Primary Mental Health Prevention

KW - Separation Anxiety

KW - SOCIALIZATION

RP - NOT IN FILE

SP - 147

EP - 155

JF - Child Psychiatry and Human Development

VL - 7:

IS - 3

N2 - Evaluated the effects of early day care intervention for young children at risk for psychiatric and/or developmental pathology by comparing 2 groups of children: (a) 10 3-yr-olds entering regular day care who had been in an infant day care treatment from ages ranging from 3 to 18 mo, and (b) 14 normal matched 3-yr-old controls entering regular day care for the first time. All Ss were assessed for general pathology, play, socialization, and separation variables in arrival, play, and mealtime situations, and were naturalistically observed in the day centers. No significant differences between groups were found on any of the variables within situations or across situations, supporting the hypothesis that the treatment intervention supported major positive emotional developments and that the early separations were not detrimental in effect. Significant differences between the 2 groups on clusters of variables suggest patterns in coping and disturbance style specific to the control group. (PsycINFO Database Record (c) 2012 APA, all rights reserved)

SN - 0009-398X



AD - Resch, Ruth C.: State U New York, Downstate Medical Ctr  
ER -

TY - JOUR

ID - 884

T1 - An empirical study of children's competitive play

A1 - Levy, Joseph

Y1 - 1976///

N1 - Peer-Reviewed Status-Unknown: 1978-03375-001

English

Journal; Peer-Reviewed Status-Unknown

KW - PsycInfo

KW - Achievement Motivation

KW - Childhood Play Behavior

KW - Competition

KW - Risk Taking

RP - NOT IN FILE

SP - 35

EP - 41

JF - Ontario Psychologist

VL - 8:

IS - 2

N2 - Examined the effect of high and low levels of achievement needs on risk-taking (RT) behavior in a competitive play situation. 144 boys in Grades 4-6 were divided into groups oriented toward high achievement (HA) and low achievement (LA) on the basis of the Children's Achievement Scale. RT was operationalized by the number of shots the S selected from 3 difficulty levels in a "ray gun" shooting contest and by the ability of the opponent selected by the S based on their viewing opponents of 3 different levels (trained confederates). As predicted, the LAs took more shots from the easy and hard categories, the HAs from the medium category. The expected similar differentiation in opponent selection was not found. Both groups tended to choose opponents of equal ability. (PsycINFO Database Record (c) 2012 APA, all rights reserved)

SN - 0030-3054

AD - Levy, Joseph: U Waterloo, Canada

ER -

TY - JOUR

ID - 885

T1 - Understanding child development through group techniques and play

A1 - Kernberg, Paulina F.

Y1 - 1975///

N1 - Peer Reviewed Journal: 1976-13183-001

English

Journal; Peer Reviewed Journal

KW - PsycInfo

KW - Childhood Development

KW - Empathy

KW - Group Counseling

KW - Recreation

KW - Teaching

RP - NOT IN FILE

SP - 409

EP - 419

JF - Bulletin of the Menninger Clinic

VL - 39:

IS - 5

N2 - Discusses the details of sessions and the results of a workshop on empathy with children, designed as an application of the Tavistock model. The workshop served as a laboratory where the following individual

differences were explored: coping mechanisms (including mechanisms of defense); aspects of socialization in different phases; and the crucial role of the teacher in a large group, as experienced by the participants in their workshop roles as "young students" under the consultant-teacher. A glimpse of what was necessary for empathic understanding of children was provided: i.e., to get in touch with the child within oneself. In the workshop climate, regressive phenomena could be expressed and the individual could risk a response. (15 ref) (PsycINFO Database Record (c) 2012 APA, all rights reserved)

SN - 0025-9284

AD - Kernberg, Paulina F.: Albert Einstein Coll of Medicine, Bronx Municipal Hosp Ctr, Yeshiva U

ER -

TY - JOUR

ID - 886

T1 - Predictions from play

A1 - Hutt, Corinne

Y1 - 1972///

N1 - Peer Reviewed Journal: 1972-31308-001

English

Journal; Peer Reviewed Journal

KW - PsycInfo

KW - Childhood Development

KW - Exploratory Behavior

KW - Personality

KW - Prediction

KW - Social Behavior

RP - NOT IN FILE

SP - 171

EP - 172

JF - Nature

VL - 237:

IS - 5351

N2 - Reexamined 48 7-10 yr. old Ss (from an original sample of 100 nursery schoolers) to determine the present manifestations of earlier-observed characteristics of curiosity and exploration. The earlier study showed that failure to explore was related to lack of adventure in boys and to difficulties in personality and social adjustment in girls. Results of the present tests indicate that failure to explore novelty was not necessarily associated with convergent thinking in girls, and that inventive play was positively associated with the propensity for divergent and creative thinking, particularly in boys. (17 ref.) (PsycINFO Database Record (c) 2012 APA, all rights reserved)

SN - 0028-0836

AD - Hutt, Corinne: U. Oxford, England

ER -

TY - JOUR

ID - 887

T1 - The importance of creative play

A1 - Michelman, Shirley

Y1 - 1971///

N1 - Peer Reviewed Journal: 1972-25390-001

English

Journal; Peer Reviewed Journal

KW - PsycInfo

KW - Adjustment

KW - Childhood Development

KW - Cognitive Processes

KW - Learning

KW - Social Behavior

RP - NOT IN FILE

SP - 285

EP - 290

JA - American Journal of Occupational Therapy

VL - 25

IS - 6

N2 - Discusses creative play as promoting problem-solving behavior which leads to learning, coping, and adaptation to change. The positive yields of the creative process are identified as curiosity, flexibility, improvisation, commitment, and the courage to risk. Developmental stages of creative play are described, as well as factors influencing creative behavior in both normal and handicapped children. (21 ref.) (PsycINFO Database Record (c) 2012 APA, all rights reserved)

SN - 0272-9490

AD - Michelman, Shirley: U. California, Center for Health Sciences, Los Angeles

ER -

TY - JOUR

ID - 888

T1 - Hysterical psychosis: Psychopathological aspects

A1 - Siomopoulos, V.

Y1 - 1971///

N1 - Peer Reviewed Journal: 1972-05275-001

English

Journal; Peer Reviewed Journal

KW - PsycInfo

KW - Case Report

KW - Fantasies (Thought Disturbances)

KW - Fantasy (Defense Mechanism)

KW - Hysteria

KW - Psychosis

RP - NOT IN FILE

SP - 95

EP - 100

JF - British Journal of Medical Psychology

VL - 44:

IS - 2

N2 - Hysterical psychosis represents regression to the specific form of thought activity involved in children's play. Reality testing in hysterical psychosis is not impaired, yet fantasy diffuses into reality. The 2 states, acted-out fantasy and reality, exist side by side, functioning in their own right and obeying their own rules of discourse. Play and the delusional ideas of hysterical psychosis constitute a microscopic picture in the area of thought processes of the massive splitting of consciousness that is identified, usually as a variant of conversion hysteria, as personality dissociation. Descriptions of auditory or visual hallucinations by hysterical psychotic patients represent not perceptualization of thought contents, but a linguistic shift from the frame of reference of thought content to that of sensory experience. Included are the case histories of a 33-yr-old female whose premorbid personality structure was considered to be of the hysterical type, and a 21-yr-old female with severe characterological difficulties who was considered to be a suicide risk. (PsycINFO Database Record (c) 2012 APA, all rights reserved)

SN - 0007-1129

AD - Siomopoulos, V.: U. Illinois, Medical School

ER -

TY - CHAP

ID - 889

T1 - Special guidance problems with migrant children. [References]

A1 - Wagoner, Lovisa C.

Y1 - 1947///

N1 - Book: 2009-00070-033

English

Book; Edited Book

KW - PsycInfo

KW - At Risk Populations

KW - Human Migration

KW - Psychosocial Development

KW - Risk Factors

KW - School Counseling

KW - Social Adjustment

KW - Sociocultural Factors

RP - NOT IN FILE

SP - 599

EP - 619

JF - Harms, Ernest [Ed]

N2 - (from the chapter) This chapter, incomplete as it is, bears out the findings of previous studies. The migrant child's position in the school is closely related to the position of his family in the community. Problems of social adjustment and emotional stability are temporary ones except in cases in which such difficulties are chronic and antedate the migration. Moving about may augment such inherent conditions, certainly it offers no cure.

Delinquency always is greater in less favored areas. As yet it seems not to be increasing in proportion to population in spite of inadequate opportunities for play, bad housing conditions, too much money to spend. Of course, contact with different ways of life, acquaintance with different parts of the country have their value.

Whether this equals that of a settled home, continuous schooling is certainly given to question. It must be remembered, however, that some families have bettered their condition; many children attend schools superior to any they have known heretofore. One significant fact that stands out is the general incooperation of child guidance procedures in the management of children. Another is the reiterated appreciation of family solidarity as the bulwark of the child's emotional and social stability. Generally speaking, the picture of the migrant child and his particular difficulties is an extremely complicated one, full of contradictory elements. Certain factors affecting the child are inevitably accompaniments of the way of life; others stem out of the particular family situation. The problems of the migrant child are not peculiar to his migratory status, but are those common to poverty, bad housing, lack of opportunity for play, and broken homes. (PsycINFO Database Record (c) 2012 APA, all rights reserved)

ER -

TY - JOUR

ID - 890

T1 - Playgrounds can be risky for children

Y1 - 2002/10//

N1 - Accession Number: 2003036288. Language: English. Entry Date: 20030221. Publication Type: journal article; brief item. Journal Subset: Biomedical; Online/Print; USA. NLM UID: 8303523

KW - Child Safety

KW - Play and Playthings

KW - Wounds and Injuries -- Prevention and Control -- In Infancy and Childhood

KW - Child

KW - CINAHL

RP - NOT IN FILE

SP - 23

EP - 23

JA - Orthopedics Today

VL - 22

IS - 10

SN - 0279-5647

UR - <http://search.ebscohost.com/login.aspx?direct=true&db=cin20&AN=2003036288&site=ehost-live>

ER -

TY - JOUR

ID - 891

T1 - Safeguarding kids from environmental hazards

Y1 - 2007/03//

N1 - Accession Number: 2009565037. Language: English. Entry Date: 20070720. Publication Type: journal article; CEU; pictorial; tables/charts. Journal Subset: Biomedical; Blind Peer Reviewed; Editorial Board Reviewed; Expert Peer Reviewed; Online/Print; Peer Reviewed; USA. Special Interest: Pediatric Care. No. of Refs: 29 ref. NLM UID: 8702030

KW - Child Safety

KW - Environmental Health

KW - Environmental Pollution -- Prevention and Control

KW - Hazardous Materials -- Adverse Effects

KW - Adolescence

KW - Asbestos -- Adverse Effects

KW - Carbon Monoxide Poisoning -- Prevention and Control

KW - Child

KW - Child Health -- Trends

KW - Child Safety -- Trends

KW - Child,Preschool

KW - Diagnosis,Differential

KW - Eating Behavior -- In Infancy and Childhood

KW - Education,Continuing (Credit)

KW - Environmental Exposure -- Adverse Effects

KW - Fish -- Adverse Effects

KW - Household Products -- Adverse Effects

KW - Lead Poisoning -- Prevention and Control

KW - Lead Poisoning -- Risk Factors

KW - Lung Diseases,Fungal -- Prevention and Control

KW - Mercury Poisoning -- Risk Factors

KW - Occupational Exposure -- Adverse Effects

KW - Passive Smoking -- Adverse Effects

KW - Passive Smoking -- Prevention and Control

KW - Play and Playthings -- Adverse Effects

KW - Radon -- Adverse Effects

KW - Seasons

KW - Skin Neoplasms -- Etiology

KW - Skin Neoplasms -- Prevention and Control

KW - Ultraviolet Rays -- Adverse Effects

KW - United States Environmental Protection Agency -- Standards

KW - Water Pollution -- Adverse Effects

KW - Water Pollution -- Prevention and Control

KW - CINAHL

RP - NOT IN FILE

SP - 64

EP - 78

JA - Contemporary Pediatrics

VL - 24

IS - 3

N2 - Pediatricians need to know how environmental toxicants affect kids' health, and where to turn for help

SN - 8750-0507

UR - <http://search.ebscohost.com/login.aspx?direct=true&db=cin20&AN=2009565037&site=ehost-live>

ER -

TY - JOUR

ID - 892

T1 - Chapter 5: Culturally Based Health and Illness Beliefs and Practices Across the Life Span

A1 - Anderson,N.L.R.

A1 - Andrews,M.

A1 - Bent,K.N.

A1 - Douglas,M.K.

A1 - Elhammoumi,C.V.

A1 - Keenan,C.

A1 - Kemppainen,J.K.

A1 - Lipson,J.G.

A1 - Thompson Martin,C.

A1 - Mattson,S.

Y1 - 2010/10/02/

N1 - Accession Number: 2010851439. Language: English. Entry Date: 20110107. Revision Date: 20130809.

Publication Type: journal article; glossary; tables/charts. Supplement Title: Supplement. Journal Subset:

Nursing; Peer Reviewed; USA. Special Interest: Nursing Education; Obstetric Care; Pediatric Care; Women's Health. NLM UID: 9001407

KW - Transcultural Nursing -- Education

KW - Education,Nursing

KW - Curriculum

KW - Health Beliefs

KW - Symptoms

KW - Medicine,Traditional

KW - Models,Theoretical

KW - Sick Role

KW - Transcultural Care

KW - Stigma

KW - Rituals and Ceremonies

KW - Religion and Religions

KW - Spiritual Care

KW - Health Services Accessibility

KW - Cultural Diversity

KW - Access to Information

KW - Health Information

KW - Health Status

KW - Childbirth

KW - Pregnancy

KW - Infant Care

KW - Child Rearing

KW - Parent-Child Relations

KW - Play and Playthings

KW - Child Care

KW - Child Health

KW - Ethnic Groups

KW - Hereditary Diseases

KW - Infant,Newborn

KW - Infant

KW - Child,Preschool

KW - Child

KW - Adolescence

KW - Sexuality

KW - Gender Identity

KW - Circumcision

KW - Female

KW - Male

KW - Child Abuse

KW - Anemia,Sickle Cell

KW - Risk Taking Behavior

KW - Acculturation

KW - Adult  
KW - Middle Age  
KW - GLBT Persons  
KW - Reproductive Health  
KW - Sexual Health  
KW - Reproduction  
KW - Acute Disease  
KW - Trauma  
KW - Family  
KW - Sexually Transmitted Diseases  
KW - Disabled  
KW - Aged  
KW - Chronic Disease  
KW - Death  
KW - Family Role  
KW - Organ Procurement  
KW - Organ Transplantation  
KW - Culture  
KW - Advance Care Planning  
KW - Life Support Care  
KW - Terminal Care  
KW - Communication  
KW - Discipline  
KW - Human Rights  
KW - Human Development  
KW - CINAHL  
RP - NOT IN FILE  
SP - 152S  
EP - 235s  
JA - Journal of Transcultural Nursing  
VL - 21  
IS - 4  
SN - 1043-6596  
AD - University of California at Los Angeles, Los Angeles, CA USA  
UR - <http://search.ebscohost.com/login.aspx?direct=true&db=cin20&AN=2010851439&site=ehost-live>  
ER -

TY - JOUR

ID - 893

T1 - Affection workshop -- an intervention in primary health care and the contribution to the psycho-dramatic theory [Portuguese]

A1 - Araujo,J.S.

Y1 - 2005/01//

N1 - Accession Number: 2009151656. Language: Portuguese. Entry Date: 20060428. Revision Date: 20091218. Publication Type: journal article; research. Journal Subset: Biomedical; Double Blind Peer Reviewed; Editorial Board Reviewed; Expert Peer Reviewed; Mexico & Central/South America; Online/Print; Peer Reviewed. Special Interest: Pediatric Care; Public Health. No. of Refs: 8 ref

KW - Family Services

KW - Health Promotion

KW - Primary Health Care

KW - Psychodrama

KW - Adolescence

KW - Adult

KW - Brazil

KW - Child

KW - Child,Preschool

KW - Health Resource Utilization

KW - Play and Playthings

KW - Support, Psychosocial

KW - Human

KW - CINAHL

RP - NOT IN FILE

SP - 74

EP - 79

JA - Revista de Atencao Primaria a Saude

VL - 8

IS - 1

N2 - This study relates the experience of the Family Health Team (FHT) of the Jardim de Ala neighborhood in the city of Juiz de Fora, MG (1), beginning in February 2001, which covered micro-areas and population groups of higher social risk. The study was conducted by the Community Health Agents (CHA), under the supervision of the team's doctor and nurse, and was carried out using monthly meetings with children from the ages of 3 to 14, involving bingo games and snacks. The objective was to build a social support resource for these population groups that are submitted to greater social risk, in addition to improving the team/family link. The findings were an improvement in the link between the FHT and the families, and the perception, on the part of the FHT, that the users of the health services improved their utilization of preventive health activities. When we looked for theoretical support, we found reinforcement in J.L. Moreno's cluster theory for the proposal and the findings. We thus concluded: 1) games and play activities, applied by the CHAs are important tools to improve the link between the FHT and families under greater social risk; and 2) in addition to the theoretical propositions, the experience of the FHT at the Jardim de Ala demonstrated the need to study games as indirect facilitating tools of preventive health activities and also as psycho-social support

SN - 1516-7704

UR - <http://search.ebscohost.com/login.aspx?direct=true&db=cin20&AN=2009151656&site=ehost-live>

ER -

TY - JOUR

ID - 894

T1 - Children at risk: forensic nurses play a key role in caring for children living in methamphetamine labs

A1 - Bell, K.L.

Y1 - 2002/12//

N1 - Accession Number: 2009125793. Language: English. Entry Date: 20060324. Publication Type: journal article; pictorial. Journal Subset: Expert Peer Reviewed; Nursing; Online; Online/Print; Peer Reviewed; USA.

No. of Refs: 19 ref

KW - Child Abuse

KW - Child Abuse -- Nursing

KW - Forensic Nursing

KW - Methamphetamine

KW - Substance Abuse

KW - Adult

KW - Child

KW - Child Development

KW - Child, Foster

KW - Child, Preschool

KW - Documentation

KW - Dopamine -- Metabolism

KW - Foster Home Care

KW - Home Environment

KW - Infant

KW - Methamphetamine -- Adverse Effects

KW - Methamphetamine -- Pharmacodynamics

KW - Methamphetamine -- Pharmacokinetics

KW - Nursing Assessment

KW - Parents



KW - Street Drugs  
 KW - Substance Abusers  
 KW - Substance Dependence  
 KW - United States  
 KW - CINAHL  
 RP - NOT IN FILE  
 SP - 1  
 JA - On the Edge  
 VL - 8  
 IS - 4  
 UR - <http://search.ebscohost.com/login.aspx?direct=true&db=cin20&AN=2009125793&site=ehost-live>  
 ER -

TY - THES

ID - 895

T1 - The emergence of purposeful reaching: developmental changes and constraints in hand and joint kinematics of early arm movements

A1 - Bhat,A.N.

Y1 - 2005///

N1 - Accession Number: 2009560967. Language: English. Entry Date: 20070427. Revision Date: 20091218.

Publication Type: doctoral dissertation; research

KW - Arm -- In Infancy and Childhood

KW - Infant Development

KW - Movement -- In Infancy and Childhood

KW - Reaching -- In Infancy and Childhood

KW - Cross Sectional Studies

KW - Infant

KW - Infant Behavior

KW - Kinematics

KW - Play and Playthings

KW - Prospective Studies

KW - Shoulder

KW - Human

KW - CINAHL

RP - NOT IN FILE

EP - 138

PB - University of Delaware

N2 - Infants consistently reach for objects at three to five months of age. In the months before reaching, infants produce a variety of arm movements. The relationship between early arm movements and reaching is still unclear. The purpose of the present research was to determine changes in hand and joint kinematics of arm movements in the presence of a toy, in the weeks before reaching emerged. I conducted two different studies: a cross-sectional and a longitudinal study. During both the experiments, infants' arm movements were compared across two conditions: with and without a toy present. Kinematic analyses examined 3D hand, shoulder, and elbow motions. Infants showed multiple toy-oriented changes that were classified into three developmental phases. During the early phase infants scaled down their hand and joint motions in the presence of a toy and appeared to spend time visually exploring the toy. During the mid phase infants showed discontinuous and continuous toy-oriented changes. Discontinuous changes were limited to the mid phase and included an increase in movement number, speed, and smoothness. In general, infants scaled up their hand and joint motions and showed an "active period" wherein they explored their various joint motion combinations. Continuous changes existed across the mid and late phases and included an increase in hand's midline and forward positions and a decrease in distance between the hand and the toy. In addition, infants' ability to move closer to the toy was a result of toy-oriented changes in shoulder orientation and not the elbow or forearm. During the late phase infants moved closer to the toy and showed inconsistent or consistent toy contacts. The emergence of reaching showed increase in magnitude of continuous changes and additional increase in upward hand position and shoulder internal rotation orientation. These results suggest that there exists a systematic developmental trajectory for early arm movements. Early shoulder changes contribute to the emergence of reaching. Moreover, purposeful

reaching does not emerge de novo but is shaped from early arm movements. Together, these findings provide a normative database for future studies to identify patterns of infants at risk for reaching delays

SN - 0-542-29255-6

AV - UMI Order AAI3187605.

M1 - Ph.D.

UR - <http://search.ebscohost.com/login.aspx?direct=true&db=cin20&AN=2009560967&site=ehost-live>

ER -

TY - JOUR

ID - 896

T1 - Investigation of toy-noise exposure in children

A1 - Bittel,S.N.

A1 - Freeman,B.A.

A1 - Kemker,B.E.

Y1 - 2008/02//

N1 - Accession Number: 2009905511. Language: English. Entry Date: 20080627. Revision Date: 20091218. Publication Type: journal article; research; tables/charts. Journal Subset: Allied Health; Editorial Board Reviewed; Expert Peer Reviewed; Peer Reviewed; USA. Special Interest: Pediatric Care; Speech-Language Pathology/Audiology. No. of Refs: 17 ref. NLM UID: 8413380

KW - Environmental Exposure -- In Infancy and Childhood

KW - Hearing Loss,Noise-Induced -- Risk Factors

KW - Noise -- Standards

KW - Play and Playthings -- Standards

KW - Auditory Threshold -- Evaluation

KW - Child

KW - Child Safety -- Standards

KW - Hearing Loss,Noise-Induced -- Education

KW - Parents -- Education

KW - Product Labeling

KW - Product Surveillance

KW - Sound Spectrography -- Equipment and Supplies

KW - United States Occupational Safety and Health Administration

KW - Human

KW - CINAHL

RP - NOT IN FILE

SP - 10

EP - 18

JA - Seminars in Hearing

VL - 29

IS - 1

N2 - This study analyzed ear canal and open-field sound-pressure level measurements of 24 commercially available toys from five national retail stores. Only toys manufactured after creation of the American Society for Testing and Materials International (ASTM International) noise standard in 2003 were included. Sound-pressure level measurements were compared with the ASTM International standard to determine if toys put children at risk for acquiring noise-induced hearing loss (NIHL). The efficacy of this standard also was assessed. Results of this study indicate that many children's toys exceed the current recommended standards for safe noise levels. Children may be at risk for acquiring NIHL if exposed to these toys. A checks-and-balances system might encourage toy manufacturers to better adhere to the standard. Use of probe-microphone measurements in the creation of a new standard might be helpful. In addition to limiting maximum output levels, it might be prudent to require warning labels on all toys that produce noise at an intensity over a specified level. Current efforts to educate parents on the dangers of NIHL should be continued and expanded

SN - 0734-0451

AD - Nova Southeastern University, Fort Lauderdale, Florida

UR - <http://search.ebscohost.com/login.aspx?direct=true&db=cin20&AN=2009905511&site=ehost-live>

ER -

TY - JOUR

ID - 897

T1 - Readers panel. Risks and rewards

A1 - Brown,J.

A1 - Humm,C.

A1 - John,M.

A1 - Weeks,S.

Y1 - 2007/07/11/

N1 - Accession Number: 2009627945. Language: English. Entry Date: 20070831. Revision Date: 20080328. Publication Type: journal article; pictorial. Journal Subset: Double Blind Peer Reviewed; Europe; Expert Peer Reviewed; Nursing; Peer Reviewed; UK & Ireland. Special Interest: Pediatric Care. NLM UID: 8508427

KW - Child

KW - Child Safety

KW - Parent-Child Relations

KW - Play and Playthings

KW - CINAHL

RP - NOT IN FILE

SP - 26

EP - 27

JA - Nursing Standard

VL - 21

IS - 44

N2 - Should parents allow their children to play outdoors unsupervised, or is it too risky? We asked our readers panel

SN - 0029-6570

AD - Senior Clinical Governance Facilitator, Worcestershire Acute NHS Trust

UR - <http://search.ebscohost.com/login.aspx?direct=true&db=cin20&AN=2009627945&site=ehost-live>

ER -

TY - JOUR

ID - 898

T1 - Risky business: : dangerous games children play

A1 - Cartwright,C.

Y1 - 2009/03//

N1 - Accession Number: 2010270921. Language: English. Entry Date: 20090515. Revision Date: 20091204. Publication Type: journal article; abstract. Journal Subset: Canada; Editorial Board Reviewed; Nursing; Peer Reviewed. NLM UID: 101321312

KW - Games -- Adverse Effects -- In Adolescence

KW - Play and Playthings -- Adverse Effects -- In Adolescence

KW - Risk Taking Behavior -- In Adolescence

KW - Adolescence

KW - Neuroscience Nursing

KW - CINAHL

RP - NOT IN FILE

SP - 16

EP - 16

JA - Canadian Journal of Neuroscience Nursing

VL - 31

IS - 1

SN - 1913-7176

UR - <http://search.ebscohost.com/login.aspx?direct=true&db=cin20&AN=2010270921&site=ehost-live>

ER -

TY - JOUR

ID - 900

T1 - Language intervention and AAE-speaking children: issues and preliminary data

A1 - Craig-Unkefer,Lesley

A1 - Camarata,Stephen

Y1 - 2010/07//

N1 - Accession Number: 2010893077. Language: English. Entry Date: 20110114. Revision Date: 20110114. Publication Type: journal article; research; tables/charts. Journal Subset: Allied Health; Peer Reviewed; USA. Special Interest: Pediatric Care; Speech-Language Pathology/Audiology. Instrumentation: Peabody Picture Vocabulary Test (PPVT-3); Preschool Language Scale-3 (PLS-3) (Zimmerman et al); Expressive Vocabulary Test (EVT); Test for Auditory Comprehension of Language (TACL) (Carrow and Woolfolk). Grant Information: Grant 5P50DC003282-05 from the National Institute on Deafness and Other Communication Disorders of the National Institutes of Health. No. of Refs: 47 ref. NLM UID: 8201220

KW - Accents and Dialects

KW - Blacks

KW - Language Disorders -- In Infancy and Childhood

KW - Language Therapy -- Methods

KW - Child,Preschool

KW - Conversation

KW - Cultural Sensitivity

KW - Funding Source

KW - Grammar

KW - Human

KW - Illinois

KW - Interrater Reliability

KW - Language Tests

KW - Play and Playthings

KW - Pretest-Posttest Design

KW - Project Head Start -- Illinois

KW - Repeated Measures

KW - Role Models

KW - Speech and Language Assessment -- Methods

KW - Vocabulary

KW - CINAHL

RP - NOT IN FILE

SP - 205

EP - 222

JF - Topics in Language Disorders

VL - 30

IS - 3

N2 - Purpose: Facilitating language development in children with specific language impairment (SLI) who are learning African American English (AAE) as their first dialect requires clinicians to consider grammatical, lexical, and cultural differences. The purpose of this article is to examine 2 intervention methods that have an extensive history of validation for general American English -- imitation using discrete trials and conversational recast -- for use with children who speak AAE. Methods: Participants in the preliminary study were 4 pre-school-aged AAE-speaking children, who were at-risk for language delays and who used AAE forms. A within-participants design was employed. Results: Both interventions were associated with growth in contrastive and noncontrastive target structure use. All children increased production of specific language targets that were not observed in baseline samples in AAE or general American English forms, and language scores on posttreatment assessments increased in all participants. Discussion: Considerations include individualizing interventions on the basis of level of support and understanding the relationship between language learning and culture

SN - 0271-8294

AD - Vanderbilt University, Nashville, TN, USA

UR - <http://search.ebscohost.com/login.aspx?direct=true&db=cin20&AN=2010893077&site=ehost-live>

ER -

TY - JOUR

ID - 901

T1 - Parent directiveness in free play with young children with physical impairments

A1 - Cress,C.J.

A1 - Moskal,L.

A1 - Hoffmann,A.

Y1 - 2008/02//

N1 - Accession Number: 2009934097. Language: English. Entry Date: 20080711. Revision Date: 20120309. Publication Type: journal article; research; tables/charts. Journal Subset: Allied Health; Blind Peer Reviewed; Editorial Board Reviewed; Expert Peer Reviewed; Online/Print; Peer Reviewed; USA. Special Interest: Pediatric Care; Speech-Language Pathology/Audiology. Grant Information: Supported in part by Grant Number K08 DC00102-01A1 from the National Institute on Deafness and other Communicative Disorders, NIH. No. of Refs: 39 ref

KW - Alternative and Augmentative Communication

KW - Child Development Disorders

KW - Parental Behavior

KW - Parents of Disabled Children

KW - Age Factors

KW - Coding

KW - Communicative Disorders

KW - Correlational Studies

KW - Descriptive Statistics

KW - Female

KW - Funding Source

KW - Infant

KW - Male

KW - Mental Status

KW - Motor Skills Disorders

KW - Parent-Child Relations

KW - Play and Playthings

KW - Random Sample

KW - Human

KW - CINAHL

RP - NOT IN FILE

SP - 99

EP - 108

JF - Communication Disorders Quarterly

VL - 29

IS - 2

N2 - Children with disabilities are reported to experience a high degree of directive parent interaction compared to typically developing children because of poor communicative or task skills. This study examines relationships between parent behaviors (directiveness and contingency) and child skills (language and motor) for children with physical or neuromotor impairments at risk for being nonspeaking during undirected incidental play. The only correlation between parent behavior and child developmental status was between physical directiveness and child motor scores. Previous reports of high directiveness that increase with degree of disability might be attributable to task instructions during object play, in which high physical directiveness would be required for this population

SN - 1525-7401

AD - University of Nebraska-Lincoln

UR - <http://search.ebscohost.com/login.aspx?direct=true&db=cin20&AN=2009934097&site=ehost-live>

ER -

TY - JOUR

ID - 902

T1 - A positive behavioural intervention for toddlers: parent-child attunement therapy

A1 - Dombrowski,S.C.

A1 - Timmer,S.G.

A1 - Blacker,D.M.

A1 - Urquiza,A.J.

Y1 - 2005/03//

N1 - Accession Number: 2009130869. Language: English. Entry Date: 20070126. Revision Date: 20091218. Publication Type: journal article; research; tables/charts. Journal Subset: Allied Health; Europe; Online/Print; Peer Reviewed; UK & Ireland. Special Interest: Pediatric Care; Social Work. Instrumentation: Eyberg Child Behavior Inventory (ECBI)(Eyberg and Robinson); Emotional Availability Scales (EA)(Biringen et al); Child Behavior Checklist (CBCL) (Achenbach and Edelbrock); Parenting Stress Index (PSI-sf). No. of Refs: 45 ref. NLM UID: 9301476. Email: sdombrowski@rider.edu

KW - Child Abuse

KW - Child Behavior Disorders -- Therapy

KW - Mother-Infant Relations

KW - Parenting Education

KW - Adult

KW - California

KW - Checklists

KW - Child Behavior Checklist

KW - Child Behavior Disorders -- Complications

KW - Clinical Assessment Tools

KW - Communication

KW - Emotions

KW - Female

KW - Infant

KW - Infant Behavior

KW - Interrater Reliability

KW - Interviews

KW - Intraclass Correlation Coefficient

KW - Male

KW - Marriage -- Psychosocial Factors

KW - Nonparticipant Observation

KW - One-Shot Case Study

KW - Outcome Assessment

KW - Parenting

KW - Play and Playthings

KW - Reflection

KW - Reinforcement (Psychology)

KW - Repeated Measures

KW - Scales

KW - Human

KW - CINAHL

RP - NOT IN FILE

SP - 132

EP - 151

JA - Child Abuse Review

VL - 14

IS - 2

N2 - Parent-child attunement therapy (PCAT) is a promising intervention for toddlers (aged 12-30 months) who have experienced maltreatment. PCAT has two overall purposes: (1) to strengthen caregivers' relationship with their children; and (2) to facilitate caregivers' learning of appropriate child management techniques. PCAT represents an adaptation of parent-child interaction therapy (PCIT), which has been empirically documented in preschool and early elementary schoolchildren to improve behavioural adjustment and engender a stronger bond between caregiver and child. There is, however, a noted paucity of intervention research for toddlers, specifically maltreated toddlers. As toddlerhood represents a critical period for enhancing the relationship between caregivers and children and is a stage when youngsters are at increased risk for maltreatment, the objectives of PCAT become even more salient during the toddler years. The purpose of this study, therefore, is to introduce PCAT and then examine its effectiveness through a single case study of a 23-month-old maltreated toddler and his biological mother. Pre- and post-assessment measures included the Parenting Stress Index, the Dyadic Parent-Child Interaction Coding System (DPICS), the Achenbach Child Behavior Checklist (CBCL), the

Emotional Availability (EA) Scales and the Eyberg Child Behavior Inventory (ECBI). The results of this study demonstrate the effectiveness of PCAT in increasing the number of positive caregiver-toddler interactions and enhancing the overall quality of the caregiver-toddler relationship. Practitioners will be able to use the techniques described in this manuscript to improve the parent-toddler relationship and ameliorate many commonly experienced behavioural difficulties found among maltreatment-prone parent-toddler dyads. Therapeutic progress is easily charted so that effectiveness may be documented and termination of therapy may be easily discerned. Copyright - ©2005 John Wiley & Sons, Ltd

SN - 0952-9136

AD - 202 Memorial Hall, Rider University Lawrenceville, New Jersey

UR - <http://search.ebscohost.com/login.aspx?direct=true&db=cin20&AN=2009130869&site=ehost-live>

ER -

TY - JOUR

ID - 903

T1 - Physical activity, adiposity and urbanization level in children: results for the Italian cohort of the IDEFICS study

A1 - Donatiello,E.

A1 - Dello,Russo

A1 - Formisano,A.

A1 - Lauria,F.

A1 - Nappo,A.

A1 - Reineke,A.

A1 - Sparano,S.

A1 - Barba,G.

A1 - Russo,P.

A1 - Siani,A.

Y1 - 2013/08//

N1 - Accession Number: 2012366402. Language: English. Entry Date: 20131122. Publication Type: journal article; research; tables/charts. Journal Subset: Biomedical; Europe; Peer Reviewed; Public Health; UK & Ireland. Special Interest: Pediatric Care; Public Health. Grant Information: European Community, within the Sixth RTD Framework Programme Contract No. 016181 (FOOD).. NLM UID: 0376507

KW - Physical Activity -- In Infancy and Childhood

KW - Adipose Tissue -- In Infancy and Childhood

KW - Urban Population -- Italy

KW - Geographic Factors -- Italy

KW - Life Style -- Classification

KW - Human

KW - Funding Source

KW - Prospective Studies -- Italy

KW - Italy

KW - Obesity -- Risk Factors -- In Infancy and Childhood

KW - Child

KW - Child,Preschool

KW - Questionnaires

KW - Body Weights and Measures

KW - COMPARATIVE studies

KW - Rural Population

KW - Suburban Population

KW - Natural Environment

KW - Descriptive Statistics

KW - Play and Playthings -- Classification

KW - CINAHL

RP - NOT IN FILE

SP - 761

EP - 765

JA - Public Health (Elsevier)

VL - 127

IS - 8

SN - 0033-3506

AD - Epidemiology and Population Genetics, Institute of Food Sciences, CNR, Avellino, Italy

BIPS -- Institute for Epidemiology and Prevention Research GmbH, Bremen, Germany

UR - <http://search.ebscohost.com/login.aspx?direct=true&db=cin20&AN=2012366402&site=ehost-live>

ER -

TY - JOUR

ID - 904

T1 - As they grow. 4-5 years: little daredevil

A1 - Durocher,H.J.

Y1 - 2006/11//

N1 - Accession Number: 2009571647. Language: English. Entry Date: 20070525. Publication Type: journal article; pictorial. Journal Subset: Consumer Health; USA. Special Interest: Consumer Health; Pediatric Care.

NLM UID: 9891378

KW - Child Behavior

KW - Parenting

KW - Play and Playthings -- In Infancy and Childhood

KW - Risk Taking Behavior -- In Infancy and Childhood

KW - Adult

KW - Child,Preschool

KW - CINAHL

RP - NOT IN FILE

SP - 219

EP - 220

JA - Parents (10836373)

VL - 81

IS - 11

SN - 1083-6373

UR - <http://search.ebscohost.com/login.aspx?direct=true&db=cin20&AN=2009571647&site=ehost-live>

ER -

TY - JOUR

ID - 905

T1 - Tales from the road: memorable experiences at work or play. Of fairs, fires, and family fun... this article originally appeared in Healthcare Traveler

A1 - Eason,J.A.

Y1 - 2007/03//

N1 - Accession Number: 2009546266. Language: English. Entry Date: 20070504. Revision Date: 20091030.

Publication Type: journal article; pictorial. Journal Subset: Core Nursing; Nursing; Peer Reviewed; USA. NLM UID: 20010080R

KW - Careers in Nursing

KW - Traveling Health Professionals

KW - Adolescence

KW - California

KW - Family

KW - Female

KW - Male

KW - Registered Nurses

KW - CINAHL

RP - NOT IN FILE

SP - 55

EP - 55

JA - RN

VL - 70



IS - 3

N2 - When Robert Gilman, RN, received a wedding invitation from his cousin, he never realized it would turn into an opportunity to share an amazing adventure with his children

SN - 0033-7021

UR - <http://search.ebscohost.com/login.aspx?direct=true&db=cin20&AN=2009546266&site=ehost-live>

ER -

TY - JOUR

ID - 906

T1 - DataBase: research and evaluation results. A national study of neighborhood safety, outdoor play, television viewing, and obesity in preschool children

A1 - Evenson,K.

A1 - Aytur,S.

Y1 - 2006/09//

N1 - Accession Number: 2009338782. Language: English. Entry Date: 20061208. Revision Date: 20091218. Publication Type: journal article; abstract; commentary; research. Original Study: Burdette HL and Whitaker RC. A national study of neighborhood safety, outdoor play, television viewing, and obesity in preschool children. PEDIATRICS 2005 Sep; 116(3): 657-62 (research) . Journal Subset: Blind Peer Reviewed; Double Blind Peer Reviewed; Editorial Board Reviewed; Expert Peer Reviewed; Health Promotion/Education; Peer Reviewed; USA. Special Interest: Pediatric Care. NLM UID: 8701680

KW - Obesity -- Epidemiology -- In Infancy and Childhood

KW - Obesity -- Risk Factors -- In Infancy and Childhood

KW - Physical Activity

KW - Residence Characteristics

KW - Television

KW - Child,Preschool

KW - Human

KW - CINAHL

RP - NOT IN FILE

SP - 59

EP - 59

JF - American Journal of Health Promotion

JA - Am J Health Promot

VL - 21

IS - 1

SN - 0890-1171

UR - <http://search.ebscohost.com/login.aspx?direct=true&db=cin20&AN=2009338782&site=ehost-live>

ER -

TY - JOUR

ID - 907

T1 - Unsettling Representational Practices: Inhabiting Relational Becomings in Early Childhood Education

A1 - Fikile,Nxumalo

Y1 - 2012/07//

N1 - Accession Number: 2011887239. Language: English. Entry Date: 20130621. Revision Date: 20130621. Publication Type: journal article; pictorial. Journal Subset: Biomedical; Blind Peer Reviewed; Editorial Board Reviewed; Online/Print; Peer Reviewed; USA. Special Interest: Pediatric Care. No. of Refs: 59 ref. NLM UID: 7801928

KW - Cultural Diversity

KW - Education -- In Infancy and Childhood

KW - Race Relations

KW - Social Identity -- In Infancy and Childhood

KW - Social Justice

KW - Child

KW - Child Welfare

KW - Child,Preschool

KW - Play and Playthings

KW - Politics

KW - Schools,Nursery

KW - Stigma

KW - Students,Elementary

KW - Teaching Methods

KW - CINAHL

RP - NOT IN FILE

SP - 281

EP - 302

JA - Child & Youth Services

VL - 33

IS - 3-4

N2 - This article seeks to unsettle representational practices enacted through dominant multicultural pedagogical approaches in the early childhood classroom. Drawing from a research study in early childhood centers that investigated practitioners' and children's negotiations of racial difference, I explore how multicultural pedagogical approaches in early childhood spaces present a risk through the potential for static representations of difference and diversity. I argue that these approaches potentially reproduce inequalities and delimit ways of engaging with difference and diversity through prescribing identity and dampening capacities for certain bodies in certain spaces. I offer possibilities for movements away from pre-defined and prescriptive approaches toward complexified approaches that require close attunement to the emergence of material-discursive assemblages. Attention to relational becomings has the potential to open possibilities for socially just early childhood pedagogies that enact a micropolitical engagement with the material-discursive entanglements of everyday encounters

SN - 0145-935X

UR - <http://search.ebscohost.com/login.aspx?direct=true&db=cin20&AN=2011887239&site=ehost-live>

ER -

TY - JOUR

ID - 909

T1 - Medical malpractice and its consequences: does physician gender play a role?

A1 - Freeborn,D.K.

A1 - Levinson,W.

A1 - Mullooly,J.P.

Y1 - 1999/09//

N1 - Accession Number: 2000017878. Language: English. Entry Date: 20000301. Revision Date: 20091218. Publication Type: journal article; research; tables/charts. Journal Subset: Peer Reviewed; USA. Instrumentation: Tedium Index (Pines et al). No. of Refs: 40 ref. NLM UID: 9889882. Email: Don.Freeborn@kp.org

KW - Physicians

KW - Sex Factors

KW - Malpractice -- Legislation and Jurisprudence -- United States

KW - United States

KW - Risk Factors

KW - Health Maintenance Organizations

KW - Malpractice -- Psychosocial Factors

KW - SURVEYS

KW - Physicians,Women

KW - Burnout,Professional

KW - Hypothesis

KW - Ohio

KW - Northwestern United States

KW - Evaluation Research

KW - Professional Practice -- Methods

KW - Questionnaires

KW - Self Report

KW - Workload

KW - Summated Rating Scaling

KW - Coefficient Alpha

KW - Chi Square Test

KW - Analysis of Variance

KW - Independent Variable

KW - Logistic Regression

KW - Multiple Regression

KW - Descriptive Statistics

KW - P-Value

KW - Specialties,Medical

KW - Time Factors

KW - Odds Ratio

KW - Confidence Intervals

KW - Job Satisfaction

KW - Psychological Tests

KW - Child

KW - Aged

KW - Pregnancy

KW - Female

KW - Male

KW - Human

KW - CINAHL

RP - NOT IN FILE

SP - 201

EP - 214

JA - Journal of Gender, Culture, & Health

VL - 4

IS - 3

N2 - Research suggests that female physicians have a more patient-centered communication style, characterized by more collaboration with the patient and discussion of treatment options. These same communication characteristics have been associated with patient satisfaction and malpractice prevention. Few empirical studies, however, have examined whether gender affects malpractice risk. The primary objective of this study was to determine whether gender was associated with malpractice among health maintenance organization (HMO) physicians. A secondary objective was to examine how malpractice affected physicians' psychological well-being. Data came from mail surveys of physicians practicing in two group model HMOs. The average response rate was 80% (N = 608). Female physicians were significantly less likely than male physicians to have been sued. Only 26% of the female physicians had been sued compared with 49% of the male physicians. These differences remained after adjusting for physician age, time in practice, specialty, workload, and characteristics of physicians' patient panels. Sued physicians were significantly more at risk for burnout than never-sued physicians and were less satisfied with the HMO. These findings did not differ by gender

SN - 1087-3201

AD - Kaiser Center for Health Research, 3800 N. Interstate Avenue, Portland, Oregon 97227

UR - <http://search.ebscohost.com/login.aspx?direct=true&db=cin20&AN=2000017878&site=ehost-live>

ER -

TY - JOUR

ID - 911

T1 - Are children attending child play areas at risk of infectious diseases? What can be done?

A1 - Gauci,C.

A1 - Borg,D.

Y1 - 2007///

N1 - Accession Number: 2009521814. Language: English. Entry Date: 20070525. Revision Date: 20100409. Publication Type: journal article; research; tables/charts. Journal Subset: Europe; Health Promotion/Education; Online/Print; Peer Reviewed; Public Health; UK & Ireland. Special Interest: Public Health. No. of Refs: 14 ref.

Email: [charmaine.gauci@gov.mt](mailto:charmaine.gauci@gov.mt)

KW - Communicable Diseases -- Prevention and Control -- In Infancy and Childhood

KW - Infection Control  
KW - Microbial Contamination  
KW - Play and Playthings  
KW - Accreditation  
KW - Child  
KW - Descriptive Statistics  
KW - Environmental Monitoring  
KW - Food Handling  
KW - Health Knowledge  
KW - Interviews  
KW - Mediterranean Islands  
KW - Parental Attitudes  
KW - Parents  
KW - Questionnaires  
KW - Risk Assessment  
KW - Sterilization and Disinfection  
KW - SURVEYS  
KW - Human  
KW - CINAHL  
RP - NOT IN FILE

SP - 22

EP - 28

JF - Journal of the Royal Society for the Promotion of Health

JA - J R SOC PROMOT HEALTH

VL - 127

IS - 1

N2 - Aims: Child play areas can pose a risk to children of infectious diseases. The prolonged presence of micro-organisms in the environment has already been established. In order to quantify this risk, specific studies are required when carrying out a risk assessment

Methods: In order to assess the microbiological hazard in play areas in Malta, a study was performed during 2005, which consisted of an examination of the hygienic practices carried out in play areas by means of face-to-face interviews; inspections of the premises; environmental sampling and testing, and a study on the awareness and attitudes of parents to risk factors (face-to-face interviews). Follow up studies were performed after recommendations on risk management were provided

Results: Overall, the hygienic practices in play areas were satisfactory. Of the premises 66% were licensed, 55% of the food handlers were registered, appropriate cooking and cooling facilities were available for most of the premises, temperature control records were available at 80% of premises, 60% were using disinfectant for cleaning play area surfaces and monitoring of refrigerated vehicles was carried out by 60%. There was an overall improvement after recommendations were given

At the first inspection, 67% of the premises were categorized as being fair and 33% as being good. On repeat inspection, after recommendations were made, the grading of the premises were: excellent 7%, satisfactory 33%, good 53% and fair 7%

The results of the environmental swabs taken had low counts of indicator organisms indicating a good overall hygienic condition

Parents stated that 58% of the areas were in good hygienic condition but lacked adequate hand-washing facilities for children. All parents agreed with the importance of hand hygiene and that infectious diseases can be transmitted via contaminated objects and from one person to another

Conclusion: An effective control strategy needs to be implemented involving all stakeholders to ensure that effective hygienic practices in play areas are available to protect children from infectious diseases

SN - 1466-4240

AD - Head of Disease Surveillance Unit, Disease Surveillance Unit, 37-39 Rue D'Argens, Msida, Malta

UR - <http://search.ebscohost.com/login.aspx?direct=true&db=cin20&AN=2009521814&site=ehost-live>

ER -

TY - JOUR

ID - 912

T1 - Interventions for childhood overweight and obesity: a place for parenting skills

A1 - Gibbons,K.

Y1 - 2007/09//

N1 - Accession Number: 2009657268. Language: English. Entry Date: 20080125. Publication Type: journal article; commentary. Original Study: GOLLEY RK, PERRY RA, MAGAREY A, and DANIELS L. Family-focused weight management program for five- to nine-year-olds incorporating parenting skills training with healthy lifestyle information to support behaviour modification. NUTR DIET 2007 Sep; 64(3): 144-50 . Journal Subset: Allied Health; Australia & New Zealand; Blind Peer Reviewed; Online/Print; Peer Reviewed. Special Interest: Nutrition; Pediatric Care. No. of Refs: 17 ref

KW - Obesity -- Therapy -- In Infancy and Childhood

KW - Parenting

KW - Weight Reduction Programs

KW - Australia

KW - Behavioral Changes

KW - Child

KW - Child Nutrition

KW - Obesity -- Risk Factors

KW - Parenting Education

KW - Play and Playthings

KW - Sleep

KW - Television

KW - CINAHL

RP - NOT IN FILE

SP - 142

EP - 143

JA - Nutrition & Dietetics

VL - 64

IS - 3

SN - 1446-6368

UR - <http://search.ebscohost.com/login.aspx?direct=true&db=cin20&AN=2009657268&site=ehost-live>

ER -

TY - JOUR

ID - 913

T1 - Myofascial Structural Integration: A Promising Complementary Therapy for Young Children With Spastic Cerebral Palsy

A1 - Hansen,Alexis

A1 - Price,Karen

A1 - Feldman,Heidi

Y1 - 2012/04//

N1 - Accession Number: 2011495669. Language: English. Entry Date: 20120420. Revision Date: 20120824. Publication Type: journal article; research; tables/charts. Journal Subset: Alternative/Complementary Therapies; Nursing; Online/Print; Peer Reviewed; USA. Special Interest: Pediatric Care; Physical Therapy.

Instrumentation: Child Behavior Checklist (CBCL) (Achenbach and Edelbrock); Gross Motor Function Classification System (GMFCS); Gross Motor Function Measure (GMFM)-66; International Classification of Functioning, Disability, and Health. Grant Information: This study was conducted with support from Stanford University Medical School Medical Scholars funding program.. No. of Refs: 20 ref

KW - Muscle Spasticity -- Therapy

KW - Manual Therapy -- Psychosocial Factors

KW - Cerebral Palsy -- Complications

KW - Myofascial Release -- Methods

KW - Motor Skills Disorders -- Classification -- In Infancy and Childhood

KW - Rolfing -- Methods

KW - Funding Source

KW - Child

KW - Pilot Studies

KW - Human  
KW - Male  
KW - Female  
KW - Child,Preschool  
KW - Scales  
KW - Play and Playthings  
KW - Random Assignment  
KW - Crossover Design  
KW - Professional-Family Relations  
KW - Muscle Relaxation -- Physiology  
KW - Contracture -- Risk Factors  
KW - Students,Medical  
KW - Videorecording  
KW - Child Behavior Checklist  
KW - Descriptive Statistics  
KW - Range of Motion  
KW - International Classification of Functioning,Disability,and Health  
KW - Treatment Outcomes  
KW - CINAHL  
RP - NOT IN FILE  
SP - 131  
EP - 135  
JA - Journal of Evidence-Based Complementary & Alternative Medicine  
VL - 17  
IS - 2  
SN - 2156-5872  
AD - School of Medicine, Stanford University, Stanford, CA, USA  
School of Medicine, Stanford University, Stanford, CA, USA hfeldman@stanford.edu  
UR - <http://search.ebscohost.com/login.aspx?direct=true&db=cin20&AN=2011495669&site=ehost-live>  
ER -

TY - JOUR

ID - 915

T1 - Can I Play? A Concept Analysis of Participation in Children with Disabilities

A1 - Hoogsteen,L.

A1 - Woodgate,R.L.

Y1 - 2010/11//

N1 - Accession Number: 2010828509. Language: English. Entry Date: 20101119. Revision Date: 20120727.

Publication Type: journal article; case study; research; systematic review; tables/charts. Journal Subset: Allied

Health; Double Blind Peer Reviewed; Editorial Board Reviewed; Expert Peer Reviewed; Online; Peer

Reviewed; USA. Special Interest: Evidence-Based Practice; Occupational Therapy; Pediatric Care; Physical

Therapy. No. of Refs: 84 ref. NLM UID: 8109120

KW - Play and Playthings -- In Infancy and Childhood

KW - Social Behavior -- Classification -- In Infancy and Childhood

KW - Child,Disabled

KW - Child

KW - Human

KW - Concept Analysis

KW - Social Alienation

KW - Skill Acquisition

KW - Psychological Well-Being

KW - Canada

KW - Models,Theoretical

KW - Conceptual Framework

KW - International Classification of Functioning,Disability,and Health

KW - Occupational Therapy Practice,Evidence-Based

KW - Physical Therapy Practice,Evidence-Based

KW - CINAHL Database

KW - Cochrane Library

KW - Medline

KW - Male

KW - Paraplegia

KW - Adolescence

KW - Female

KW - Interpersonal Relations

KW - Autonomy

KW - Quality of Life

KW - Occupation (Human)

KW - CINAHL

RP - NOT IN FILE

SP - 325

EP - 339

JA - Physical & Occupational Therapy in Pediatrics

VL - 30

IS - 4

N2 - Participation is essential to children's development. Children with disabilities are at risk for restricted participation. Despite wide use of the word participation, the definition remains vague. The eight steps of analysis by Walker and Avant (2005) were used to guide the concept analysis. The uses and defining attributes of participation were identified and cases formulated within the context of children with disabilities and health care professions. In order to participate, a child with disabilities must take part in something or with someone, they must have a sense of inclusion, control over what they are taking part in, and be working toward obtaining a goal or enhanced quality of life. Through participation children acquire new skills, have increased physical, emotional and social well-being and enhanced quality of life. It is hoped that health care professionals can use this definition to address the shortcomings of existing programs and develop measures to assess the attributes of participation

SN - 0194-2638

AD - Faculty of Nursing, University of Manitoba, Winnipeg, Manitoba R3T 2N2, Canada (E-mail: umhoogsl@cc.umanitoba.ca)

UR - <http://search.ebscohost.com/login.aspx?direct=true&db=cin20&AN=2010828509&site=ehost-live>

ER -

TY - JOUR

ID - 917

T1 - New Adventures with the Fire Ants

A1 - Huhtanen,Shelly

Y1 - 2011/11//

N1 - Accession Number: 2011401413. Language: English. Entry Date: 20120113. Revision Date: 20120224.

Publication Type: journal article; anecdote; pictorial. Journal Subset: Consumer Health; USA. Special Interest:

Consumer Health; Pediatric Care. NLM UID: 7702637

KW - Child,Disabled

KW - Autistic Disorder

KW - Play and Playthings

KW - Child

KW - Male

KW - Interpersonal Relations

KW - Teamwork

KW - CINAHL

RP - NOT IN FILE

SP - 28

EP - 28

JA - Exceptional Parent

VL - 41

IS - 11

SN - 0046-9157

UR - <http://search.ebscohost.com/login.aspx?direct=true&db=cin20&AN=2011401413&site=ehost-live>

ER -

TY - JOUR

ID - 918

T1 - Effect of sleep and play positions on infant development: reconciling developmental concerns with SIDS prevention

A1 - Hunter,J.G.

A1 - Malloy,M.H.

Y1 - 2002/03//

N1 - Accession Number: 2004030370. Language: English. Entry Date: 20040206. Revision Date: 20080725.

Publication Type: journal article; case study; pictorial; tables/charts. Journal Subset: Nursing; Online/Print;

USA. No. of Refs: 65 ref. NLM UID: 101126037

KW - Infant Development

KW - Infant Development Disorders -- Etiology

KW - Motor Skills Disorders -- Etiology -- In Infancy and Childhood

KW - Patient Positioning -- In Infancy and Childhood

KW - Play and Playthings -- In Infancy and Childhood

KW - Sleep -- In Infancy and Childhood

KW - Sudden Infant Death -- Prevention and Control

KW - Cranial Molding

KW - Infant

KW - Infant,Newborn

KW - Infant,Premature

KW - Male

KW - Posture -- In Infancy and Childhood

KW - Prone Position -- Adverse Effects -- In Infancy and Childhood

KW - Sudden Infant Death -- Epidemiology -- United States

KW - Sudden Infant Death -- Risk Factors

KW - Supine Position -- In Infancy and Childhood

KW - United States

KW - CINAHL

RP - NOT IN FILE

SP - 9

EP - 16

JA - Newborn & Infant Nursing Reviews

VL - 2

IS - 1

N2 - Preterm infants have traditionally been considered at risk for positional deformities and delayed or atypical development. During the last decade, however, similar problems have increasingly been documented in normal infants born at term gestation, with recommendations of supine sleeping for prevention of sudden infant death syndrome often implicated as a causal factor. This article seeks to inform and educate neonatal and pediatric nurses on positional and postural influences in normal and delayed infant development, including the relationship of sleep and play positions to developmental issues. An observant nurse who understands normal development, can recognize atypical postures, and is knowledgeable about potential developmental consequences is in a position to intervene at the earliest interaction with the family. The American Academy of Pediatrics (AAP) sleep position guidelines, however, must not be compromised in the process. Current AAP rationale and guidelines for prevention of sudden infant death syndrome are summarized to facilitate nursing efforts to correctly model and teach infant caregivers. Common-sense suggestions for hospital and community-based nurses to help parents avoid preventable developmental delay while reinforcing current sleep position guidelines are presented. Copyright 2002, Elsevier Science (USA). All rights reserved

SN - 1527-3369

AD - Department of Rehabilitation Services, Infant Special Care Unit, University of Texas Medical Branch, Galveston, TX



UR - <http://search.ebscohost.com/login.aspx?direct=true&db=cin20&AN=2004030370&site=ehost-live>  
ER -

TY - JOUR

ID - 919

T1 - MINERVA

A1 - Jamal-Hanjani, Mariam

A1 - Beharry, Nigel

A1 - Samol, Jens

Y1 - 2011/07/02/

N1 - Accession Number: 2011244555. Language: English. Entry Date: 20110902. Revision Date: 20111111.

Publication Type: journal article; diagnostic images. Journal Subset: Biomedical; Blind Peer Reviewed;

Editorial Board Reviewed; Europe; Expert Peer Reviewed; Online/Print; Peer Reviewed; UK & Ireland. NLM

UID: 101090866

KW - Stress Disorders, Post-Traumatic

KW - Dementia -- Risk Factors

KW - Cerebral Edema -- Complications

KW - Neoplasms -- Therapy

KW - Nanomedicine

KW - Spinal Fractures -- Surgery

KW - Domestic Violence -- Complications

KW - Child Behavior Disorders -- Etiology

KW - Play and Playthings -- Evaluation

KW - Arthroplasty, Replacement, Knee -- Evaluation

KW - Creutzfeldt-Jakob Syndrome -- Diagnosis

KW - Cardiovascular Diseases -- Mortality

KW - Physicians -- Evaluation

KW - Infant

KW - Child

KW - CINAHL

RP - NOT IN FILE

SP - 50

EP - 50

JA - BMJ: British Medical Journal (Overseas & Retired Doctors Edition)

VL - 343

IS - 7813

SN - 1759-2151

AD - Special registrar in medical oncology, St George+, ++ Hospital Healthcare NHS Trust, London SW17 0QT

Consultant radiologist, St George+, ++ Hospital Healthcare NHS Trust, London SW17 0QT

Consultant medical oncologist, St George+, ++ Hospital Healthcare NHS Trust, London SW17 0QT

UR - <http://search.ebscohost.com/login.aspx?direct=true&db=cin20&AN=2011244555&site=ehost-live>

ER -

TY - JOUR

ID - 920

T1 - Group intervention as one facet of a multi-component intervention with high risk mothers and their babies

A1 - Jarrett, M.H.

A1 - Diamond, L.T.

A1 - El-Mohandes, A.

Y1 - 2000/07//

N1 - Accession Number: 2000055477. Language: English. Entry Date: 20000901. Revision Date: 20091218.

Publication Type: journal article; research; tables/charts. Journal Subset: Biomedical; Peer Reviewed; USA.

Grant Information: Grants (U18-HD30445, U18-HD30447, U18-HD30454, U18-HD30458, U18-HD30463, and U18-HD31206) from the NICHD and the NIH ORMH. No. of Refs: 36 ref. NLM UID: 8915767

KW - Support, Psychosocial

KW - Poverty  
KW - Early Childhood Intervention  
KW - Parenting Education  
KW - Random Assignment  
KW - Experimental Studies  
KW - Support Groups  
KW - Infant Development  
KW - Research Subject Recruitment  
KW - Mothers  
KW - Play and Playthings  
KW - Interviews  
KW - Consumer Satisfaction -- Evaluation  
KW - Adult  
KW - Female  
KW - Funding Source  
KW - Human  
KW - CINAHL  
RP - NOT IN FILE  
SP - 15  
EP - 24  
JA - Infants & Young Children: An Interdisciplinary Journal of Special Care Practices  
VL - 13  
IS - 1  
N2 - The relationship between infants and parents is affected by the larger social system, including the correlates of poverty. Group intervention services have proven to be an effective means of informing and supporting parents of infants and young children. The Pride in Parenting Group Intervention Curriculum was developed as part of a multicomponent intervention with a population of indigent African American women and their infants. In exit interviews with 57 mothers, parent satisfaction was high for developmental and parenting information and for the support of the group and the intervention professionals. Copyright - <sup>a</sup>2000 by Aspen Publishers, Inc  
SN - 0896-3746  
AD - Associate Professor, George Washington University, Washington, EC  
UR - <http://search.ebscohost.com/login.aspx?direct=true&db=cin20&AN=2000055477&site=ehost-live>  
ER -  
  
TY - JOUR  
ID - 922  
T1 - Child and mother variables in the development of stuttering among high-risk children: a longitudinal study  
A1 - Kloth,S.  
A1 - Janssen,P.  
A1 - Kraaimaat,F.  
A1 - Bruten,G.J.  
Y1 - 1998/11//  
N1 - Accession Number: 1999027043. Language: English. Entry Date: 19990401. Revision Date: 20091218. Publication Type: journal article; research; tables/charts. Journal Subset: Allied Health; Peer Reviewed; USA. Instrumentation: Reynell Developmental Language Scales (RDLS) Dutch Version; Peabody Picture Vocabulary Test (PPVT) Dutch Version. Grant Information: Dutch Organization of Scientific Research (NWO-Psychon No. 560-268-038). No. of Refs: 31 ref. NLM UID: 7601744  
KW - Fluency Disorders -- In Infancy and Childhood  
KW - Fluency Disorders -- In Adulthood  
KW - Mother-Child Relations  
KW - Funding Source  
KW - Parental Role  
KW - Child,Preschool  
KW - Risk Factors  
KW - Case Control Studies

KW - Prospective Studies  
KW - Adult  
KW - Language Tests  
KW - Videorecording  
KW - Play and Playthings  
KW - Speech Rate  
KW - Analysis of Variance  
KW - Descriptive Statistics  
KW - Analysis of Covariance  
KW - Repeated Measures  
KW - Human  
KW - CINAHL  
RP - NOT IN FILE  
SP - 217  
EP - 230  
JA - Journal of Fluency Disorders  
VL - 23  
IS - 4  
SN - 0094-730X  
AD - University of Utrecht, Utrecht, The Netherlands  
UR - <http://search.ebscohost.com/login.aspx?direct=true&db=cin20&AN=1999027043&site=ehost-live>  
ER -

TY - JOUR

ID - 923

T1 - Persistence and remission of incipient stuttering among high-risk children

A1 - Kloth,S.A.

A1 - Kraaimaat,F.W.

A1 - Janssen,P.

A1 - Brutten,G.J.

Y1 - 1999/12//

N1 - Accession Number: 2000025062. Language: English. Entry Date: 20000401. Revision Date: 20091218.

Publication Type: journal article; research; tables/charts. Journal Subset: Allied Health; Peer Reviewed; USA.

Instrumentation: Dutch Version of the Reynell Language Development Scale; Peabody Picture Vocabulary Test (PPVT). Grant Information: Dutch Organisation of Scientific Research (NWO-Psychon No.: 560-268-038). No. of Refs: 42 ref. NLM UID: 7601744

KW - Fluency Disorders -- In Infancy and Childhood

KW - Funding Source

KW - Risk Factors

KW - Prevalence

KW - Recovery

KW - Prospective Studies

KW - Child,Preschool

KW - Child

KW - Parental Attitudes

KW - Pretest-Posttest Design

KW - Language Tests

KW - Play and Playthings

KW - Mother-Child Relations

KW - Female

KW - Male

KW - Two-Way Analysis of Variance

KW - Repeated Measures

KW - Mean Length of Utterance

KW - Human

KW - CINAHL

RP - NOT IN FILE

SP - 253

EP - 265

JA - Journal of Fluency Disorders

VL - 24

IS - 4

SN - 0094-730X

AD - University of Utrecht, Dept of Phoniatics, The Netherlands

UR - <http://search.ebscohost.com/login.aspx?direct=true&db=cin20&AN=2000025062&site=ehost-live>

ER -

TY - JOUR

ID - 924

T1 - Expressive Language Skills in Finnish Two-Year-Old Extremely- and Very-Low-Birth-Weight Preterm Children

A1 - Kunnari,Sari

A1 - Yliherva,Anneli

A1 - Paavola,Leila

A1 - Peltoniemi,Outi

Y1 - 2011/12//

N1 - Accession Number: 2011399577. Language: English. Entry Date: 20120127. Revision Date: 20120217.

Publication Type: journal article; research; tables/charts. Journal Subset: Allied Health; Biomedical; Continental Europe; Editorial Board Reviewed; Europe; Expert Peer Reviewed; Online/Print; Peer Reviewed. Special Interest: Pediatric Care; Speech-Language Pathology/Audiology. Grant Information: Partly supported by a research grant from the Academy of Finland.. No. of Refs: 40 ref. NLM UID: 9422792

KW - Speech -- In Infancy and Childhood

KW - Communication Skills -- In Infancy and Childhood

KW - Language Development -- In Infancy and Childhood

KW - Child,Preschool

KW - Infant,Premature

KW - Infant,Very Low Birth Weight

KW - Human

KW - Finland

KW - Videorecording

KW - Play and Playthings

KW - Nonparametric Statistics

KW - Mann-Whitney U Test

KW - Funding Source

KW - Male

KW - Female

KW - Child

KW - CINAHL

RP - NOT IN FILE

SP - 5

EP - 11

JA - Folia Phoniatica et Logopaedica

VL - 64

IS - 1

N2 - Objective: Preterm children with low birth weight are at greater risk of experiencing speech and language difficulties than full-term children. The aim of the current study was to investigate expressive language skills of Finnish-speaking preterm children with low birth weight [extremely-low-birth-weight (ELBW) children: n = 8; very-low-birth-weight (VLBW) children: n = 10] at 2 years of corrected age and to compare their language results with full-term controls (n = 18), using spontaneous speech samples. Methods: The children were video recorded in semistructured free-play sessions with their mothers. From these video samples, expressive vocabulary size and maximum sentence length (MSL) were analyzed. In addition, the possible effect of children's gender on language measures as well as associations between different language measures were

examined. Results: The results showed that there was no statistically significant difference between the preterm and full-term groups in the size of expressive vocabulary. In contrast, the MSL, which measures morphosyntactic skills, was significantly shorter in preterm children. A positive correlation was found between MSL and expressive vocabulary. Children's gender was not associated with language skills measured. Conclusion: The findings indicate that Finnish-speaking preterm children, especially ELBW children, experience difficulties in morphosyntactic skills. Copyright - ©2011 S. Karger AG, Basel

SN - 1021-7762

AD - Logopedics, Faculty of Humanities

Department of Pediatrics, University of Oulu, Oulu, Finland

UR - <http://search.ebscohost.com/login.aspx?direct=true&db=cin20&AN=2011399577&site=ehost-live>

ER -

TY - JOUR

ID - 925

T1 - Does a history of sexual abuse in childhood play a role in women's medical problems? A review

A1 - Laws,A.

Y1 - 1993/06//

N1 - Accession Number: 1993167699. Language: English. Entry Date: 19930901. Revision Date: 20090313. Publication Type: journal article; review; tables/charts. Journal Subset: Biomedical; Peer Reviewed; USA. No. of Refs: 72 ref. NLM UID: 9208978

KW - Child Abuse,Sexual

KW - WOMEN

KW - Health Status

KW - Adult Children

KW - Eating Disorders

KW - Pelvis

KW - Chronic Pain

KW - Substance Abuse

KW - Risk Taking Behavior

KW - Adult

KW - Middle Age

KW - Female

KW - CINAHL

RP - NOT IN FILE

SP - 165

EP - 172

JA - Journal of Women's Health

VL - 2

IS - 2

N2 - Purpose: To examine possible relations between childhood sexual abuse and women's medical problems. Data sources: Potential articles were retrieved by searching Medline and Psychlit databases using keywords which included incest, sexual abuse and assault, pain, alcohol and substance abuse, eating disorders, anorexia, bulimia, and obesity. Additional references were identified from bibliographies of these articles, from textbooks on child sexual abuse, and by experts in these fields. Study selection: Only those case series, case-control studies, and population-based surveys that were published in peer-reviewed journals were included. Results: Although available literature is sparse and many studies lack methodologic rigor, data suggest that a history of sexual abuse in childhood is common in women with a history of chronic pain (especially pelvic pain), functional bowel disorders, eating disorders, obesity, and alcohol abuse. Conclusions: Given the high prevalence of sexual abuse of girls and its possible relation to common medical problems often refractory to treatment, further research is needed both to substantiate associations and to guide therapies

SN - 1059-7115

AD - Dept Med, Stanford Univ School Med, Stanford, CA

UR - <http://search.ebscohost.com/login.aspx?direct=true&db=cin20&AN=1993167699&site=ehost-live>

ER -

TY - JOUR

ID - 926

T1 - Violence in bipolar disorder: what role does childhood trauma play?

A1 - Lee,A.M.R.

A1 - Galynker,I.I.

Y1 - 2010/11//

N1 - Accession Number: 2010918182. Language: English. Entry Date: 20110204. Revision Date: 20130614.

Publication Type: journal article; tables/charts. Journal Subset: Biomedical; Online/Print; Peer Reviewed; USA.

Special Interest: Psychiatry/Psychology. NLM UID: 9014543

KW - Child Abuse

KW - Trauma -- In Infancy and Childhood

KW - Violence -- Complications

KW - Bipolar Disorder -- Risk Factors

KW - Bipolar Disorder -- Therapy

KW - Risk Assessment

KW - Crisis Intervention

KW - Child

KW - CINAHL

RP - NOT IN FILE

SP - 32

EP - 34

JA - Psychiatric Times

VL - 27

IS - 11

SN - 0893-2905

AD - ECRIP research fellow

UR - <http://search.ebscohost.com/login.aspx?direct=true&db=cin20&AN=2010918182&site=ehost-live>

ER -

TY - THES

ID - 927

T1 - The effect of early intensive postural and movement training on head control, pre-reaching movements and early reaching behaviors

A1 - Lee,Hui Min

Y1 - 2010///

N1 - Accession Number: 2011284346. Language: English. Entry Date: 20110930. Revision Date: 20121005.

Publication Type: doctoral dissertation; research. Special Interest: Pediatric Care; Physical Therapy

KW - Functional Training -- In Infancy and Childhood

KW - Movement

KW - Posture

KW - Reaching

KW - Treatment Outcomes

KW - Arm

KW - COMPARATIVE studies

KW - Head

KW - Human

KW - Infant,Newborn

KW - Kinematics

KW - Orientation

KW - Play and Playthings

KW - Prospective Studies

KW - Skill Acquisition

KW - Skill Retention

KW - Spatial Perception

KW - CINAHL

RP - NOT IN FILE

EP - 246

PB - University of Delaware

N2 - The current project investigated the effects of early postural and movement experiences on young infants' head control, pre-reaching movements and early reaching behaviors through multi-level measurements beginning when infants were 1 month old through when they were 4 months old. Results from the current project revealed that infants with training demonstrated more advanced head control and early reaching behaviors. Infants with training also displayed different control in pre-reaching movements which led to earlier successful reaching. Specifically, the training effects (1) were rapid; (2) widely spread across multiple variables and contexts; (3) continued months after training ended; and (4) displayed interesting sequential patterns. In head control, results showed that infants with training kept demonstrated better head control through out the period of investigation and used more advanced movement strategies for active head control after training stopped. In pre-reaching movements, results showed that infants with training had faster and smoother movements during training, different joint orientation from infants without training leading to successful reaching after training stopped, and continued moving hands more forward and closer to a midline toy from training period to reach onset. The training also displayed effects with temporal to spatial and proximal to distal patterns in arm kinematics. In addition, the training showed effects on both movements with and without the presence of a midline toy. These findings suggested that with training, infants further adapted pre-reaching movements that resulted in more advanced early reaching behaviors with earlier reaching onset, more toy contacts and longer contact duration. Results from the current project strongly support the importance of early experiences on the development of head control and reaching. Future work will quantify the effect of early postural and movement experiences on infants born at high risk for lifelong movement impairments such as those born preterm and with brain injuries

SN - 978-1-124-24096-1

AV - UMI Order AAI3423344.

M1 - Ph.D.

UR - <http://search.ebscohost.com/login.aspx?direct=true&db=cin20&AN=2011284346&site=ehost-live>

ER -

TY - JOUR

ID - 928

T1 - Differentiating Maternal Sensitivity to Infant Distress and Non-Distress

A1 - Leerkes, Esther

A1 - Weaver, Jennifer

A1 - O'Brien, Marion

Y1 - 2012/04//

N1 - Accession Number: 2011581737. Language: English. Entry Date: 20130913. Revision Date: 20131004. Publication Type: journal article; research; tables/charts. Commentary: Atkinson, Leslie. Strategic Decisions: Life History, Interpersonal Relations, Intergenerational Neurobiology, and Ethics in Parenting and Development. PARENTING SCI PRACT 2012 Apr-Sep; 12(2/3): 185-91 (commentary) . Journal Subset: Biomedical; Blind Peer Reviewed; Editorial Board Reviewed; Expert Peer Reviewed; Online/Print; Peer Reviewed; USA. Special Interest: Pediatric Care. Grant Information: Data collection for the NICHD SECCYD was supported by the Eunice Kennedy Shriver National Institute of Child Health and Human Development (NICHD) through a cooperative agreement (U10) calling for scientific collaboration between the grantees and NICHD staff. Data collection for the Infant Parent Project was supported by NICHD also (R03 HD048691) and by a New Faculty Grant and Summer Excellence Award from the Office of Sponsored Programs and seed money from the Human Environmental Sciences Center for Research at The University of North Carolina at Greensboro.. NLM UID: 101093743

KW - Maternal Behavior

KW - Stress

KW - Infant Behavior

KW - Parenting

KW - Human

KW - Secondary Analysis

KW - Cues

KW - Psychological Well-Being

KW - Prospective Studies

KW - Socioeconomic Factors

KW - Female  
 KW - Structural Equation Modeling  
 KW - Descriptive Statistics  
 KW - Emotions  
 KW - Infant  
 KW - Audiorecording  
 KW - Interviews  
 KW - Kappa Statistic  
 KW - Interrater Reliability  
 KW - Play and Playthings  
 KW - Funding Source  
 KW - CINAHL  
 RP - NOT IN FILE  
 SP - 175  
 EP - 184  
 JA - Parenting: Science & Practice  
 VL - 12  
 IS - 2/3

N2 - Drawing from a domain specificity perspective, we assert that maternal sensitivity to infant distress cues is distinct from maternal sensitivity to non-distress cues. We review evidence from prior research demonstrating that the two constructs have more unshared than shared variance and that sensitivity to infant distress is a unique predictor of infants' early emotional well-being when both types of sensitivity are examined as simultaneous predictors. In addition, we present new evidence to test the hypothesis that maternal sensitivity to infant distress and non-distress have different origins. We draw on data from a subset of mothers and infants who participated in Phase I of the National Institute of Child Health and Human Development Study of Early Child Care (Study 1) and from 101 mother-infant dyads who participated in a longitudinal study of the origins of maternal sensitivity (Study 2). In both studies, maternal sensitivity to distress and non-distress were rated when infants were six months old. In both studies, socio-demographic risk (i.e., young, unmarried, low income mothers) was a stronger predictor of sensitivity to non-distress than of sensitivity to distress. In Study 2, mothers' emotional and cognitive responses to videotapes of crying infants during the prenatal period predicted maternal sensitivity during tasks designed to elicit infant fear and frustration but were unrelated to maternal sensitivity in a non-arousing free play context. Maternal sensitivity during infancy can be further divided into specific sub-types that have unique origins and unique effects on subsequent child well-being. Methodological, theoretical, and applied implications of such an approach are discussed

SN - 1529-5192

AD - Human Development and Family Studies, University of North Carolina, PO Box 26170, Greensboro, NC, 27402-6170, USA

Boise State University

The University of North Carolina, Greensboro

UR - <http://search.ebscohost.com/login.aspx?direct=true&db=cin20&AN=2011581737&site=ehost-live>

ER -

TY - JOUR

ID - 929

T1 - Early Intervention in a Child Care Setting Using Play and Family Therapy

A1 - Matte,Rebecca

A1 - Messmore,Carol

Y1 - 2013/07//

N1 - Accession Number: 2012196916. Language: English. Entry Date: 20130809. Revision Date: 20131011.

Publication Type: journal article; case study; pictorial. Journal Subset: Biomedical; USA. Special Interest:

Pediatric Care. NLM UID: 9879031

KW - Early Childhood Intervention

KW - Disruptive Behavior

KW - Behavior Therapy -- Methods

KW - Play Therapy

KW - Child,Preschool



KW - Male  
KW - Florida  
KW - Professional-Family Relations  
KW - Family Therapy  
KW - CINAHL  
RP - NOT IN FILE  
SP - 43  
EP - 47  
JA - Zero to Three  
VL - 33  
IS - 6  
N2 - At an alarming rate, preschoolers are being expelled from child care centers because of disruptive behavior, and elementary schools are dealing with social-emotional behaviors that affect the entire classroom. The authors share the story of a child who would have been one of those expelled from child care and at risk in the elementary school classroom if he had not been referred to an early intervention program. Through the use of individual play therapy, group play therapy, and in-home family therapy, the child and his family were able to learn coping skills, improve the parent-child interaction, and increase self-awareness, all which benefited the family system as a whole  
SN - 0736-8038  
AD - Housing Partnership, Inc., Riviera Beach, Florida  
Capella University  
UR - <http://search.ebscohost.com/login.aspx?direct=true&db=cin20&AN=2012196916&site=ehost-live>  
ER -

TY - JOUR  
ID - 931  
T1 - Playing it safe  
A1 - Murphy,M.  
Y1 - 2007/07//  
N1 - Accession Number: 2009642191. Language: English. Entry Date: 20071019. Revision Date: 20100409. Publication Type: journal article; pictorial. Journal Subset: Europe; Health Promotion/Education; Online/Print; Peer Reviewed; Public Health; UK & Ireland. Special Interest: Pediatric Care; Public Health  
KW - Child Safety  
KW - Health Promotion  
KW - Play and Playthings -- Adverse Effects -- In Infancy and Childhood  
KW - Wounds and Injuries -- Etiology -- In Infancy and Childhood  
KW - Wounds and Injuries -- Prevention and Control -- In Infancy and Childhood  
KW - Adolescence  
KW - Child  
KW - Male  
KW - Risk Taking Behavior  
KW - Shoes  
KW - Skating  
KW - United Kingdom  
KW - United States  
KW - CINAHL  
RP - NOT IN FILE  
SP - 156  
EP - 157  
JF - Journal of the Royal Society for the Promotion of Health  
JA - J R SOC PROMOT HEALTH  
VL - 127  
IS - 4  
N2 - Every year over 35,000 children under 15 in the UK are admitted to hospital with injuries caused by toys. Accidents will happen, but are recent, potentially dangerous crazes such as Heelys, trampolines, scooters and even Nintendo Wiis contributing too much to the statistics? And how can we get the balance right by keeping

kids safe at play without wrapping them in cotton wool and discouraging physical activity? JRSH's Mandy Murphy finds out  
SN - 1466-4240  
UR - <http://search.ebscohost.com/login.aspx?direct=true&db=cin20&AN=2009642191&site=ehost-live>  
ER -

TY - JOUR

ID - 932

T1 - Everyday uncertainty: parents' risk perceptions and children's free play... Occupational Therapy Australia, 24th National Conference and Exhibition, 29 June - 1 July 2011

A1 - Niehues,A.

A1 - Bundy,A.

Y1 - 2011/06/02/

N1 - Accession Number: 2011278281. Language: English. Entry Date: 20111209. Revision Date: 20111209.

Publication Type: journal article; abstract; research. Supplement Title: Supplement. Journal Subset: Allied Health; Australia & New Zealand; Peer Reviewed. Special Interest: Occupational Therapy; Pediatric Care.

NLM UID: 15420200R

KW - Child Safety

KW - Fear -- In Adulthood

KW - Health Promotion

KW - Obesity -- In Infancy and Childhood

KW - Parenting

KW - Play and Playthings

KW - Adult

KW - Child

KW - Constant Comparative Method

KW - Coping

KW - Human

KW - Perception

KW - Qualitative Studies

KW - Semi-Structured Interview

KW - Thematic Analysis

KW - CINAHL

RP - NOT IN FILE

SP - 42

EP - 42

JF - Australian Occupational Therapy Journal

JA - Aust Occup Ther J

VL - 58

SN - 0045-0766

UR - <http://search.ebscohost.com/login.aspx?direct=true&db=cin20&AN=2011278281&site=ehost-live>

ER -

TY - JOUR

ID - 934

T1 - Parent-child activity group treatment in preventive psychiatry

A1 - Olson,L.

A1 - Heaney,C.

A1 - Soppas-Hoffman,B.

Y1 - 1989/05//

N1 - Accession Number: 1989098474. Language: English. Entry Date: 19891101. Publication Type: journal article; case study. Journal Subset: Allied Health; Peer Reviewed; USA. No. of Refs: 31 ref. NLM UID: 8309883

KW - Pediatric Occupational Therapy

KW - Preventive Health Care

KW - Mental Disorders -- Prevention and Control

KW - Parent-Child Relations

KW - Child Development

KW - Play and Playthings

KW - Child,Preschool

KW - Adult

KW - Female

KW - CINAHL

RP - NOT IN FILE

SP - 29

EP - 43

JA - Occupational Therapy in Health Care

VL - 6

IS - 1

N2 - This article describes the role that occupational therapy played in a community outreach program instituted collaboratively by a major teaching hospital and a local day care center. The program focused on preschool children at risk for developing psychiatric disorders. A parent-child activity group was introduced and developed by an occupational therapist who was a member of the hospital staff. The frame of reference, the parent-child intervention including the use of play and group process, and the method of monitoring change in families are explained. A case study is also provided

SN - 0738-0577

UR - <http://search.ebscohost.com/login.aspx?direct=true&db=cin20&AN=1989098474&site=ehost-live>

ER -

TY - JOUR

ID - 935

T1 - Narrative production by children who are deaf or hard of hearing: the effect of role-play

A1 - Pakulski,L.A.

A1 - Kaderavek,J.N.

Y1 - 2003/06//

N1 - Accession Number: 2003134822. Language: English. Entry Date: 20031017. Revision Date: 20100402. Publication Type: journal article; research; tables/charts. Journal Subset: Allied Health; Blind Peer Reviewed; Editorial Board Reviewed; Expert Peer Reviewed; Peer Reviewed; USA. Special Interest: Pediatric Care; Speech-Language Pathology/Audiology. Instrumentation: Story Grammar Analysis Protocol. No. of Refs: 28 ref. NLM UID: 0417476

KW - Hearing Disorders -- In Infancy and Childhood

KW - Narratives -- In Infancy and Childhood

KW - Role Playing

KW - Adolescence

KW - Child

KW - Content Analysis

KW - Descriptive Statistics

KW - Female

KW - Grammar

KW - Male

KW - Nonparametric Statistics

KW - Quasi-Experimental Studies

KW - Questionnaires

KW - Storytelling

KW - Wilcoxon Signed Rank Test

KW - Human

KW - CINAHL

RP - NOT IN FILE

SP - 127

EP - 139

JA - Volta Review

VL - 103

IS - 3

N2 - Narrative ability is one of the best predictors of school success for children with a language impairment or learning disability. Much less is known about the development of narrative performance in children who are deaf or hard of hearing. Studies involving the development of text structure knowledge in children who are deaf or hard of hearing often focus on written or signed narrative productions. Children who are learning to listen and talk (auditory/oral or Auditory-Verbal approaches) are capable of benefitting from an auditory representation of the printed text. However, these children are at risk for language problems with respect to narrative productivity, fluency, lexical diversity, and grammatical complexity and accuracy. Repeated reading and role-playing are ways of targeting these skills explicitly in academically appropriate and contextually relevant situations. Story retellings were elicited from 14 children who are deaf or hard of hearing and are oral communicators following repeated readings of two stories and role-playing of one of the two stories. Results showed that children who are deaf or hard of hearing are capable of narrative production (story retelling) and that the sophistication and complexity of those retellings improve with role-play.

SN - 0042-8639

AD - Assistant Professor of Audiology, University of Toledo, Toledo, OH

UR - <http://search.ebscohost.com/login.aspx?direct=true&db=cin20&AN=2003134822&site=ehost-live>

ER -

TY - THES

ID - 936

T1 - If I cry less I can fit in more play dates: mothers' experiences with time famine

A1 - Pontes,N.M.H.

Y1 - 2003///

N1 - Accession Number: 2005073993. Language: English. Entry Date: 20050506. Revision Date: 20091218.

Publication Type: doctoral dissertation; research. Special Interest: Women's Health

KW - Family Health

KW - Health Status

KW - Mothers -- Psychosocial Factors

KW - Stress,Psychological

KW - Time

KW - Conceptual Framework

KW - Family Relations

KW - Female

KW - Interviews

KW - Maternal Role

KW - Participant Observation

KW - Phenomenological Research

KW - Role Stress

KW - Social Isolation

KW - Thematic Analysis

KW - Human

KW - CINAHL

RP - NOT IN FILE

EP - 235

PB - Columbia University

N2 - As time has become an increasingly valued resource of our postmodern world, many individuals are experiencing a phenomenon called "time famine," the chronic perceived shortage of time. Mothers are especially vulnerable to time famine as they assume multiple roles. Previous researchers hypothesized that these mothers are at increased risk for sickness and death. However, epidemiological studies do not support this premise primarily because these women tend to be younger and relatively free of chronic diseases.

The purpose of this qualitative research was to explore six mothers' lived experiences of time famine and how it impacts their family health within a broad context of health and wellbeing. A multi-method approach using in-depth interviews, participant observations, and space activity profiles were used.

Six themes emerged from these data: The women felt that their lives were characterized by (1) all work and no fun; they expressed feelings of being (2) rundown, (3) stressed, and (4) disconnected. They (5) consumed numerous goods and services in order to maintain a standard of living beyond their means. Their energies were

spent on (6) managing and concealing their psychological distress. Despite appearing healthy, in reality, they had significant problems with insomnia, sleep deprivation, depression, anxiety, disordered eating, chronic pain, and headaches

These participants purposed to provide a "better" childhood for their children than they themselves had experienced. Paradoxically, while giving the appearance of intense involvement with their children these mothers were frequently emotionally distant from both their children and spouse

The study concludes that (1) the participants lead lives that are consumed by the excessive consumption of goods and services to the extent that (2) they confuse dwelling with doing. Although they participate in many activities, they are often disconnected from the people and things around them. (3) As a society, our time has become increasingly privatized, whereby there is a disengagement from community and relationships that could otherwise function to buffer time famine. The resulting social isolation has far-reaching implications for society at large. A conceptual framework for time famine is described based on these phenomena and related literature about personal strivings, demoralization, and phenomenological geography

AV - UMI Order AAI3088407.

M1 - D.N.Sc.

UR - <http://search.ebscohost.com/login.aspx?direct=true&db=cin20&AN=2005073993&site=ehost-live>

ER -

TY - JOUR

ID - 937

T1 - The Active City of Liverpool, Active Schools and Sportslinx (A-CLASS) project

A1 - Ridgers,N.

A1 - Stratton,G.

A1 - Foweather,L.

A1 - Henaghan,J.

A1 - McWhannell,N.

A1 - Stone,M.R.

Y1 - 2006/04//

N1 - Accession Number: 2009244481. Language: English. Entry Date: 20070209. Revision Date: 20091218.

Publication Type: journal article; algorithm; research. Journal Subset: Biomedical; Editorial Board Reviewed;

Europe; Expert Peer Reviewed; Online/Print; Peer Reviewed; UK & Ireland. Special Interest: Pediatric Care.

No. of Refs: 21 ref. NLM UID: 8805809

KW - Health Promotion

KW - Physical Activity -- In Infancy and Childhood

KW - Physical Education and Training

KW - Schools,Elementary

KW - Sports -- In Infancy and Childhood

KW - Body Composition

KW - Cardiovascular Risk Factors

KW - Child

KW - Child Development

KW - England

KW - Evaluation Research

KW - Interpersonal Relations

KW - Obesity

KW - Play and Playthings

KW - Program Development

KW - Students,Elementary

KW - Human

KW - CINAHL

RP - NOT IN FILE

SP - 26

EP - 29

JA - Education & Health

VL - 24

IS - 2

N2 - The A-CLASS Project is a unique multi-disciplinary project, which consists of multi-sports activity coaches who will be responsible for running after school and community sports clubs, and four research coaches who will analyse the effects of these programmes on the physical activity levels of Liverpool school children  
SN - 0265-1602

AD - Research Institute for Sport and Exercise Sciences, Liverpool John Moores University, UK

UR - <http://search.ebscohost.com/login.aspx?direct=true&db=cin20&AN=2009244481&site=ehost-live>

ER -

TY - JOUR

ID - 938

T1 - Play hard, breathe easy: managing asthma in the camp setting

A1 - Rodriguez, Jodie

Y1 - 2012/06//

N1 - Accession Number: 2011588350. Language: English. Entry Date: 20120928. Revision Date: 20130322.

Publication Type: journal article; tables/charts. Journal Subset: Double Blind Peer Reviewed; Expert Peer Reviewed; Nursing; Peer Reviewed; USA. Special Interest: Pediatric Care. No. of Refs: 4 ref

KW - Asthma -- Nursing -- In Infancy and Childhood

KW - Camp Nursing

KW - Nursing Role

KW - Administration, Inhalation

KW - Adrenal Cortex Hormones -- Therapeutic Use

KW - Adrenergic Beta-Agonists -- Therapeutic Use

KW - Asthma -- Diagnosis

KW - Asthma -- Drug Therapy

KW - Asthma -- Education

KW - Asthma -- Prevention and Control

KW - Bronchodilator Agents -- Therapeutic Use

KW - Child

KW - Disease Exacerbation -- Prevention and Control

KW - Drug Administration -- Nursing

KW - Nebulizers and Vaporizers

KW - Staff Development

KW - CINAHL

RP - NOT IN FILE

SP - 10

EP - 13

JA - CompassPoint

VL - 22

IS - 2

N2 - Because asthma affects one out of 10 children in the US, it is imperative that camp nurses be knowledgeable and well equipped to manage asthma. Clinical assessment, trigger management, and medication administration are components in the daily care of an asthmatic child. Further, it is critical that health center staff know the early and late signs of an asthma exacerbation and be able to manage those episodes, especially those which are emergent in nature. While kids with asthma can be fully active and participate in all camp activities if managed correctly, children with asthma are at risk for serious consequences, even death, if not assessed and managed correctly

UR - <http://search.ebscohost.com/login.aspx?direct=true&db=cin20&AN=2011588350&site=ehost-live>

ER -

TY - JOUR

ID - 940

T1 - Emotional availability, parental self-efficacy beliefs, and child development in caregiver-child relationships with buprenorphine-exposed 3-year-olds

A1 - Salo, S.

A1 - Kivistik, K.

A1 - Korja, R.

A1 - Biringen,Z.

A1 - Tupola,S.

A1 - Kahila,H.

A1 - Kivitie-Kallio,S.

Y1 - 2009/07//

N1 - Accession Number: 2010362200. Language: English. Entry Date: 20090911. Revision Date: 20120309. Publication Type: journal article; research; tables/charts. Journal Subset: Biomedical; Blind Peer Reviewed; Editorial Board Reviewed; Expert Peer Reviewed; Online/Print; Peer Reviewed; USA. Special Interest: Pediatric Care. Instrumentation: Emotional Availability Scales (EAS); Self-Efficacy for Parenting Tasks Index-Toddler Scale (SEPTI-TS); Bayley Scales of Infant and Toddler Development, Third Edition (Bayley-III). No. of Refs: 50 ref. NLM UID: 101093743

KW - Child Development

KW - Maternal Behavior

KW - Parent-Child Relations

KW - Self-Efficacy

KW - Buprenorphine -- Adverse Effects

KW - Caregivers

KW - Child,Preschool

KW - Coefficient Alpha

KW - COMPARATIVE studies

KW - Descriptive Statistics

KW - Female

KW - Finland

KW - Interrater Reliability

KW - Multiple Regression

KW - One-Way Analysis of Variance

KW - Play and Playthings

KW - Pregnancy

KW - Prenatal Exposure Delayed Effects

KW - Scales

KW - Substance Use Disorders

KW - Videorecording

KW - Human

KW - CINAHL

RP - NOT IN FILE

SP - 244

EP - 259

JA - Parenting: Science & Practice

VL - 9

IS - 3-4

N2 - Objective. The purpose was to compare emotional availability, maternal self-efficacy beliefs, and child developmental status in caregiver-child relationships with prenatally buprenorphineexposed and nonexposed 3-year-old children. Design. We compared prenatally buprenorphineexposed children living either with the biological mother (n = 7) or in foster care (n = 14) to nonexposed participants (n = 13). Emotional availability was coded from videotaped parentchild free-play interactions. Results. After controlling for covariates, buprenorphine-exposed children scored lower on maternal Sensitivity and Nonhostility and child Responsiveness and Involvement as well as lower on the Bayley Cognitive and Language scales than did nonexposed children. As compared to foster mothers, biological mothers scored lower on Sensitivity and Nonhostility and self-efficacy beliefs, and their children scored lower on Responsiveness and the Bayley Cognitive Scale. Regardless of group status, the parenting variables were meaningfully related to child socioemotional variables. Conclusions. Buprenorphine-exposed children experienced more environmental risks in emotional availability and parental self-efficacy and performed worse on the Bayley as compared to nonexposed children

SN - 1529-5192

UR - <http://search.ebscohost.com/login.aspx?direct=true&db=cin20&AN=2010362200&site=ehost-live>

ER -

TY - JOUR

ID - 941

T1 - Reliability and validity of a new instrument to measure tolerance of everyday risk for children...  
Occupational Therapy Australia, 24th National Conference and Exhibition, 29 June - 1 July 2011

A1 - Smith,A.

A1 - Bundy,A.

Y1 - 2011/06/02/

N1 - Accession Number: 2011277486. Language: English. Entry Date: 20111209. Revision Date: 20111209.  
Publication Type: journal article; abstract; research. Supplement Title: Supplement. Journal Subset: Allied  
Health; Australia & New Zealand; Peer Reviewed. Special Interest: Occupational Therapy; Pediatric Care.  
NLM UID: 15420200R

KW - Clinical Assessment Tools -- Evaluation

KW - Health Beliefs -- In Adulthood

KW - Instrument Validation

KW - Occupational Therapy

KW - Play and Playthings

KW - Risk Taking Behavior -- In Infancy and Childhood

KW - Adult

KW - Child

KW - Clinical Assessment Tools

KW - Coefficient Alpha

KW - Goodness of Fit Chi Square Test

KW - Human

KW - Questionnaires

KW - Reliability

KW - SURVEYS

KW - Validation Studies

KW - Validity

KW - CINAHL

RP - NOT IN FILE

SP - 8

EP - 8

JF - Australian Occupational Therapy Journal

JA - Aust Occup Ther J

VL - 58

SN - 0045-0766

UR - <http://search.ebscohost.com/login.aspx?direct=true&db=cin20&AN=2011277486&site=ehost-live>

ER -

TY - JOUR

ID - 943

T1 - Keeping the hospital environment safe for children

A1 - Stower,S.

Y1 - 2000/07//

N1 - Accession Number: 2001015657. Language: English. Entry Date: 20010223. Revision Date: 20110916.  
Publication Type: journal article; CEU; exam questions. Journal Subset: Double Blind Peer Reviewed; Editorial  
Board Reviewed; Europe; Expert Peer Reviewed; Nursing; Peer Reviewed; UK & Ireland. No. of Refs: 9 ref.  
NLM UID: 9013329

KW - Health Facility Environment

KW - Child Safety

KW - Pediatric Nursing

KW - Child

KW - Education,Continuing (Credit)

KW - Play and Playthings

KW - Security Measures



KW - Fires -- Prevention and Control

KW - Risk Assessment

KW - CINAHL

RP - NOT IN FILE

SP - 37

EP - 43

JA - Paediatric Nursing

VL - 12

IS - 6

N2 - This article is aimed at all healthcare staff working within a paediatric environment or environment where children are cared for. The purpose of the article is to heighten awareness of hazards that exist in a paediatric unit and how these can be managed effectively, and therefore, safely

SN - 0962-9513

AD - Senior Nurse Manager for Children's Services, Queen's Medical Centre, University Hospital, Nottingham

UR - <http://search.ebscohost.com/login.aspx?direct=true&db=cin20&AN=2001015657&site=ehost-live>

ER -

TY - JOUR

ID - 944

T1 - The role of occupational therapy within interdisciplinary pressure care in a Ukraine orphanage...  
Occupational Therapy Australia, 24th National Conference and Exhibition, 29 June - 1 July 2011

A1 - Swaine,J.

A1 - Nguyen,V.

A1 - Luong,A.

A1 - Safe,B.

A1 - Mawson,A.

Y1 - 2011/06/02/

N1 - Accession Number: 2011279782. Language: English. Entry Date: 20111209. Revision Date: 20111209. Publication Type: journal article; abstract. Supplement Title: Supplement. Journal Subset: Allied Health; Australia & New Zealand; Peer Reviewed. Special Interest: Occupational Therapy; Physical Therapy; Speech-Language Pathology/Audiology. NLM UID: 15420200R

KW - Child,Disabled

KW - Pressure Ulcer -- Prevention and Control -- In Infancy and Childhood

KW - Risk Assessment -- Methods

KW - Student Placement

KW - Students,Occupational Therapy

KW - Students,Physical Therapy

KW - Students,Speech-Language Pathology

KW - Child

KW - Conceptual Framework

KW - Multidisciplinary Care Team

KW - Needs Assessment

KW - Orphans and Orphanages -- Ukraine

KW - Play and Playthings

KW - Ukraine

KW - CINAHL

RP - NOT IN FILE

SP - 108

EP - 108

JF - Australian Occupational Therapy Journal

JA - Aust Occup Ther J

VL - 58

SN - 0045-0766

UR - <http://search.ebscohost.com/login.aspx?direct=true&db=cin20&AN=2011279782&site=ehost-live>

ER -

TY - JOUR

ID - 946

T1 - Advanced practice. Adolescent experimentation -- risky business or child's play?

A1 - Sweeney,C.T.

Y1 - 2002/02/25/

N1 - Accession Number: 2003082937. Language: English. Entry Date: 20030613. Revision Date: 20110916.

Publication Type: journal article; case study. Journal Subset: Nursing; USA. No. of Refs: 9 ref. NLM UID: 9892045

KW - Risk Taking Behavior -- In Adolescence

KW - Risk Taking Behavior -- Prevention and Control -- In Adolescence

KW - Peer Pressure

KW - Pediatric Nursing

KW - Male

KW - Female

KW - Adolescence

KW - CINAHL

RP - NOT IN FILE

SP - 6

EP - 7

JA - Nursing Spectrum -- Philadelphia Tri -- State Edition

VL - 11

IS - 4

SN - 1074-858X

AD - Clinical Director, Urban Solutions, Philadelphia

UR - <http://search.ebscohost.com/login.aspx?direct=true&db=cin20&AN=2003082937&site=ehost-live>

ER -

TY - JOUR

ID - 947

T1 - RESEARCH NEWS

A1 - Tonks,Alison

Y1 - 2012/06/30/

N1 - Accession Number: 2011615485. Language: English. Entry Date: 20120727. Revision Date: 20121005.

Publication Type: journal article; tables/charts. Journal Subset: Biomedical; Blind Peer Reviewed; Editorial Board Reviewed; Europe; Expert Peer Reviewed; Online/Print; Peer Reviewed; UK & Ireland. NLM UID: 101090866

KW - Female

KW - Vaginal Vault Prolapse -- Surgery

KW - Urinary Incontinence -- Epidemiology

KW - Loneliness

KW - Mortality -- Epidemiology

KW - Magnetism -- Adverse Effects

KW - Play and Playthings -- Adverse Effects

KW - Child Safety

KW - Atrial Fibrillation -- Drug Therapy

KW - Flecainide Acetate -- Therapeutic Use

KW - Tissue Plasminogen Activator -- Therapeutic Use

KW - Stroke -- Drug Therapy

KW - Warfarin -- Administration and Dosage

KW - Pregnancy

KW - Pregnancy,Ectopic -- Risk Factors

KW - Dietary Carbohydrates -- Administration and Dosage

KW - Energy Metabolism -- Evaluation

KW - CINAHL

RP - NOT IN FILE

SP - 14

EP - 15

JA - BMJ: British Medical Journal (Overseas & Retired Doctors Edition)

VL - 344

IS - 7863

SN - 1759-2151

UR - <http://search.ebscohost.com/login.aspx?direct=true&db=cin20&AN=2011615485&site=ehost-live>

ER -

TY - JOUR

ID - 948

T1 - The Early Start Denver Model: a case study of an innovative practice

A1 - Vismara,L.A.

A1 - Rogers,S.J.

Y1 - 2008/12//

N1 - Accession Number: 2010125265. Language: English. Entry Date: 20090116. Revision Date: 20120309. Publication Type: journal article; case study; research; tables/charts. Journal Subset: Allied Health; Blind Peer Reviewed; Editorial Board Reviewed; Peer Reviewed; USA. Special Interest: Evidence-Based Practice; Pediatric Care; Psychiatry/Psychology. Instrumentation: Mullen Scales of Early Learning (MSEL); Autism Diagnostic Observation Schedule (ADOS); Child Behavior Rating Scale (CBRS). Grant Information: Postdoctoral Training Award NIMH T32 MH073124; National Institute of Child Health and Human Development (No. U19HD35468), Collaborative Programs of Excellence in Autism; National Institute of Mental Health STAART Center No. U54 MH66399. No. of Refs: 41 ref. NLM UID: 8910748. Email: laurie.vismara@ucdmc.ucdavis.edu

KW - Autistic Disorder -- Therapy

KW - Communication -- Education

KW - Early Childhood Intervention

KW - Parenting Education

KW - Attention

KW - Autistic Disorder -- Symptoms

KW - Case Studies

KW - Child,Disabled

KW - Child,Preschool

KW - Fathers

KW - Female

KW - Funding Source

KW - Infant

KW - Male

KW - Mothers

KW - Outcomes of Education

KW - Parents

KW - Play and Playthings

KW - Psychological Tests

KW - Scales

KW - Social Behavior

KW - Summated Rating Scaling

KW - Human

KW - CINAHL

RP - NOT IN FILE

SP - 91

EP - 108

JF - Journal of Early Intervention

VL - 31

IS - 1

N2 - Intervention was implemented with an infant identified at 9 months of age with a behavioral profile consistent with autistic spectrum disorder. The intervention approach, the Early Start Denver model, consisted of a 12-week, 1.5-hr-per-week individualized parent-child education program. Results of this case study

demonstrated that the parent acquired multiple teaching tactics that were associated with growth in the infant's social communication behaviors. Improvements were also noted with respect to the severity of behavioral indicators related to autism between 18 and 24 months of age. Findings are discussed in relation to providing an intervention model that may equip parents with the necessary intervention skills to engage, communicate with, and teach their very young children with or at risk for autism

SN - 1053-8151

AD - Dept of Psychiatry and Behavioral Sciences, MIND Institute, 2825 50th Street, Sacramento, CA 95817

UR - <http://search.ebscohost.com/login.aspx?direct=true&db=cin20&AN=2010125265&site=ehost-live>

ER -

TY - JOUR

ID - 949

T1 - Toddlers with autism: developmental perspectives

A1 - Watson,L.R.

A1 - Baranek,G.T.

A1 - DiLavore,P.C.

Y1 - 2003/07//

N1 - Accession Number: 2009032387. Language: English. Entry Date: 20051007. Publication Type: journal article; review; tables/charts. Journal Subset: Biomedical; Peer Reviewed; USA. Special Interest: Pediatric Care. No. of Refs: 64 ref. NLM UID: 8915767. Email: Linda\_Watson@med.unc.edu

KW - Autistic Disorder -- Diagnosis

KW - Child Behavior

KW - Child Development

KW - Affect

KW - Autistic Disorder -- Risk Factors

KW - Child,Preschool

KW - Communication

KW - Facial Expression

KW - Health Screening

KW - Parents -- Psychosocial Factors

KW - Play and Playthings

KW - Self Regulation

KW - SOCIALIZATION

KW - CINAHL

RP - NOT IN FILE

SP - 201

EP - 214

JA - Infants & Young Children: An Interdisciplinary Journal of Special Care Practices

VL - 16

IS - 3

N2 - Recent research has greatly expanded our knowledge about the early development of children with autism and related disorders. Familiarity with this literature will improve the ability of professionals to appropriately diagnose and intervene with young children with autism. This article reviews the literature pertaining to the development of children with autism under the age of 3 years. We examine findings on affective development, sensory processing and attention, praxis and imitation, communication, play, and motor features and stereotyped behaviors, and discuss the interrelationships among these different aspects of development. Screening and diagnostic tools with specific applicability to young children with autism are reviewed as well

SN - 0896-3746

AD - Division of Speech and Hearing Sciences, Department of Allied Health Sciences, CB # 7190, Medical School, Wing D, University of North Carolina at Chapel Hill, NC 27599-7120

UR - <http://search.ebscohost.com/login.aspx?direct=true&db=cin20&AN=2009032387&site=ehost-live>

ER -

TY - JOUR

ID - 950

T1 - Treating conduct problems and strengthening social and emotional competence in young children: the Dina Dinosaur treatment program

A1 - Webster-Stratton,C.

A1 - Reid,M.J.

Y1 - 2003/09//

N1 - Accession Number: 2004055023. Language: English. Entry Date: 20040409. Revision Date: 20060504. Publication Type: journal article; tables/charts. Journal Subset: Biomedical; Blind Peer Reviewed; Editorial Board Reviewed; Expert Peer Reviewed; Online/Print; Peer Reviewed; USA. Special Interest: Pediatric Care; Psychiatry/Psychology. No. of Refs: 57 ref. NLM UID: 9306047

KW - Behavior Therapy -- In Infancy and Childhood

KW - Child Behavior Disorders -- Therapy

KW - Social Skills Training -- In Infancy and Childhood

KW - Teaching Methods -- In Infancy and Childhood

KW - Aggression

KW - Anger

KW - Child

KW - Child,Preschool

KW - Emotions

KW - Fantasy

KW - Female

KW - Group Processes

KW - Male

KW - Play and Playthings -- Utilization

KW - Problem Solving

KW - Program Evaluation

KW - Reinforcement (Psychology)

KW - Role Playing

KW - Social Behavior

KW - Videorecording -- Utilization

KW - CINAHL

RP - NOT IN FILE

SP - 130

EP - 143

JA - Journal of Emotional & Behavioral Disorders

VL - 11

IS - 3

N2 - Young preschool and early-school-age children with early onset conduct problems are at high risk for school dropout, substance abuse, violence, and delinquency in later years. Consequently, developing treatment strategies for reducing conduct problems when aggression is in its more malleable form prior to age 8, and thus interrupting its progression, is of considerable benefit to families and society. This article describes a treatment program - the Dina Dinosaur Social, Emotional and Problem Solving Child Training Program - that was designed specifically with developmentally appropriate teaching methods for young children (ages 4 to 8 years) and based on theory related to the types of social, emotional, and cognitive deficits or excesses exhibited by children with conduct problems. The program emphasizes training children in skills such as emotional literacy, empathy or perspective taking, friendship and communication skills, anger management, interpersonal problem solving, school rules, and how to be successful at school. Emphasis is placed on ways to promote cross-setting generalization of the behaviors that are taught by involving parents and teachers in the treatment. A review of two randomized trials with this treatment approach and long-term results are provided

SN - 1063-4266

AD - Professor of Nursing, Clinical Child Psychologist, Director, Parenting Clinic, University of Washington

UR - <http://search.ebscohost.com/login.aspx?direct=true&db=cin20&AN=2004055023&site=ehost-live>

ER -

TY - JOUR

ID - 951

T1 - Older people as grandparents: how public policy needs to broaden its view of older people and the role they play within families

A1 - Wellard,Sarah

Y1 - 2012/12//

N1 - Accession Number: 2011784123. Language: English. Entry Date: 20130104. Revision Date: 20130510.

Publication Type: journal article. Journal Subset: Allied Health; Europe; Nursing; Online/Print; Peer Reviewed; UK & Ireland. Special Interest: Gerontologic Care. No. of Refs: 28 ref

KW - Grandparents

KW - Intergenerational Relations

KW - Child Care

KW - Family

KW - Employment

KW - Psychological Well-Being

KW - Public Policy -- United Kingdom

KW - Quality of Life

KW - Caregivers

KW - United Kingdom

KW - Aged

KW - Public Assistance

KW - Child

KW - Grandchildren

KW - CINAHL

RP - NOT IN FILE

SP - 257

EP - 263

JA - Quality in Ageing & Older Adults

VL - 13

IS - 4

N2 - Purpose “ The purpose of this paper is to provide a new perspective on the importance of grandparenting relationships and to highlight the continuing importance of intergenerational exchange across the life course. Design/methodology/approach “ The paper draws on research from diverse fields including child welfare, gerontology and demography and journalistic sources, presenting an evidenced argument of the importance of grandparenting in contemporary families. Findings “ The paper argues that the role of grandparents in family life is becoming more important as a result of demographic changes, and that grandparents offer a huge resource to families. Older people generally find their role as grandparents rewarding and that this contributes to wellbeing and reduced risk of loneliness. Originality/value “ The paper provides a new perspective on the role of older people as grandparents

SN - 2044-1827

UR - <http://search.ebscohost.com/login.aspx?direct=true&db=cin20&AN=2011784123&site=ehost-live>

ER -

TY - JOUR

ID - 952

T1 - Helping families find a bright tomorrow

A1 - Wessling,S.

Y1 - 2006/07//

N1 - Accession Number: 2009282619. Language: English. Entry Date: 20061110. Revision Date: 20090313.

Publication Type: journal article; pictorial. Journal Subset: Nursing; USA

KW - Early Childhood Intervention

KW - Family -- Psychosocial Factors

KW - Multidisciplinary Care Team

KW - Child,Preschool

KW - Developmental Disabilities -- Rehabilitation

KW - Home Visits

KW - Infant

KW - Massachusetts

KW - Play and Playthings

KW - CINAHL

RP - NOT IN FILE

SP - 18

EP - 21

JA - On Call

VL - 9

IS - 4

N2 - Early intervention focuses on young children who either have or are at risk for developmental delays while providing valuable support and assistance to the child's family

UR - <http://search.ebscohost.com/login.aspx?direct=true&db=cin20&AN=2009282619&site=ehost-live>

ER -

TY - JOUR

ID - 953

T1 - Play therapy with emotionally damaged adolescents

A1 - Wilson,K.

A1 - Ryan,V.

Y1 - 2002/08//

N1 - Accession Number: 2003105670. Language: English. Entry Date: 20030815. Revision Date: 20040123.

Publication Type: journal article. Journal Subset: Biomedical; Blind Peer Reviewed; Europe; Peer Reviewed;

UK & Ireland. No. of Refs: 31 ref. NLM UID: 9616901. Email: kate.wilson@nottingham.ac.uk

KW - Counseling -- Methods -- In Adolescence

KW - Parent-Child Relations

KW - Play Therapy -- In Adolescence

KW - Sexual Abuse -- Therapy -- In Adolescence

KW - Adult

KW - Female

KW - Male

KW - Professional-Client Relations

KW - Rehabilitation,Psychosocial -- Methods

KW - Treatment Outcomes

KW - Trust

KW - Adolescence

KW - CINAHL

RP - NOT IN FILE

SP - 178

EP - 192

JA - Emotional & Behavioural Difficulties

VL - 7

IS - 3

N2 - Adolescence is a critical period of development for all individuals, but particularly for those who have suffered earlier emotional difficulties or abuse. If these problems go unresolved, patterns of behaviour which become established during this period may be more difficult to change later on. However, more traditional talk therapies may be resisted by adolescents. This article argues that non-directive play therapy, given age-appropriate adaptations, offers an approach which, since it encompasses both play and verbal communication, is well suited to addressing adolescent concerns, particularly those of early adolescence. This argument is illustrated by two accounts of therapy with a boy and a girl, both in early adolescence, which show how a more traditional non-directive counselling approach was combined with play therapy by the adolescents themselves, allowing exploration of emotional difficulties on all levels of mental functioning. The cases show how traumatic or painful early memories may be reworked on a bodily and emotional level, without the feeling of over-intrusion risked by a directive or interpretive stance

SN - 1363-2752

AD - Professor of Social Work, Centre for Social Work, University of Nottingham, University Park, Nottingham NG7 2RD, UK

UR - <http://search.ebscohost.com/login.aspx?direct=true&db=cin20&AN=2003105670&site=ehost-live>

ER -

TY - GEN

ID - 954

T1 - Care of the Health of Boys in Girard, College, Philadelphia, Pennsylvania. Bulletin, 1914, No. 40. Whole Number 614

Y1 - 1914///

N1 - Last updated - 2013-06-04

KW - Pennsylvania

KW - ERIC,Resources in Education (RIE)

KW - At Risk Persons

KW - Play

KW - Dietetics

KW - MALES

KW - Lighting

KW - Nutrition

KW - Child Welfare

KW - Water

KW - Health Promotion

KW - Dental Health

KW - Sanitation

KW - Playgrounds

KW - Poverty

KW - Social Services

KW - Physicians

KW - Hygiene

KW - Physical Health

KW - ERIC

RP - NOT IN FILE

PB - United States Bureau of Education, Department of the Interior.

N2 - Girard College was founded and endowed by Stephen Girard, mariner and merchant, a native of France, who came to Philadelphia in 1776. After a long life of service to his adopted city, State, and country, he died in 1831, leaving the bulk of his estate in trust to the city of Philadelphia for the erection and maintenance of what is now known as Girard College. On a recent visit to Girard College, Philadelphia, the Secretary of the Interior, Commissioner P. P. Claxton, was so impressed with the evident good health of the boys in that institution and with the attention and care given to this important phase of the institution's work that he requested Dr.

Cheesman A. Herrick, president of the college, to have prepared for the Bureau of Education some account of the health work of the college. President Herrick has very kindly complied with his request and has forwarded this manuscript to the bureau. Commissioner Claxton recommends that it be published as a bulletin of the Bureau of Education for distribution among the officers of orphanages, home schools, so-called industrial and reform schools, schools for the feeble-minded, State schools for the deaf and the blind, and other institutions in which children are detained and on which they depend for the care of physical health as well as for education. Sections of the bulletin include: (1) Girard College (Frank O. Zesinger); (2) Statement of the visiting physician; (3) Statement of the chief of nose, throat, and ear department; (4) Statement of the ophthalmologist; and (5) The dental department. (Contains 4 footnotes and 18 plates.) [Best copy available has been provided.]

UR - <http://search.proquest.com/docview/1361846549?accountid=14701>

ER -

TY - GEN

ID - 955

T1 - Zero to Three: Bulletin of the National Center for Clinical Infant Programs. Volume VII, Nos. 1-5, September, 1986-June 1987

Y1 - 1987/06//

N1 - Availability - Level 1 - Available online, if indexed January 1993 onward

SuppNotes - For volumes 8 and 9, see EC 221 095-096

Last updated - 2012-12-14



KW - ERIC,Resources in Education (RIE)

KW - Practitioners

KW - Preschool Education

KW - Parent Education

KW - Low Income Groups

KW - Play

KW - High Risk Persons

KW - Therapy

KW - Crisis Intervention

KW - Federal Legislation

KW - Psychotherapy

KW - Individual Differences

KW - Parent Child Relationship

KW - Disabilities

KW - Day Care

KW - Early Intervention

KW - Child Neglect

KW - Child Development

KW - Child Abuse

KW - Autism

KW - Infants

KW - ERIC

RP - NOT IN FILE

SP - 150

VL - 7

IS - 1

PB - National Center for Clinical Infant Programs, 733 15th St., N.W., Suite 912, Washington, DC 20005 (\$18.00 per year).

N2 - Five bulletins of the National Center for Clinical Infant Programs include articles with the following titles and authors: "Infant Day Care: A Cause for Concern?" (Jay Belsky); "Model versus Modal Child Care for Children from Low-Income Families (Donna Wittmer); "Therapeutic Childcare at Merrywood School" (Maxine Siegel); "Individual Differences in Infants" (Lois Murphy et al.); "The 'Gourmet Baby' and the 'Little Wildflower'" (Edward Zigler and Mary Lang); "Infant-Parent Psychotherapy with an Autistic Toddler" (Barbara Kalmanson and Judith Pekarsky); "Parent Training with Young Autistic Children: A Report on the LEAP Model" (Philip Strain); "Point of View: Commenting on P.L. 99-457" (Linda Gilkerson et al.); "Selective Review of Infant Day Care Research: A Cause for Concern!" (Deborah Phillips et al.); "Risks Remain" (Jay Belsky); "Infant Mental Health and Child Abuse and Neglect: Reflections from an Infant Mental Health Practitioner" (Jeree Pawl); "Doll Play of Failure to Thrive Toddlers: Clues to Infant Experience" (Claire Haynes-Seman and Joan Suzuki Hart); "Abuse and Neglect in the Earliest Years: Groundwork for Vulnerability" (Brandt Steele); "Psychotherapy of the Violent Offender: A Recapitulation of Infant Development" (H. Joseph Horacek); "The Effectiveness of Crisis Intervention in Working with a Young Mother and Her Four Preschool Children" (Sarah Landy); "The Application of a Transactional Risk Model to Intervention with Multi-risk, Maltreating Families" (Dante Cicchetti and Sherre Toth); and "Toward Tenacity of Commitment: Understanding and Modifying Institutional Practices and Individual Responses that Impede Work with Multi-problem Families" (Barbara Fields). Issues typically also include publication reviews, program notes, and conference information. (DB)

UR - <http://search.proquest.com/docview/63019921?accountid=14701>

ER -

TY - GEN

ID - 956

T1 - Children and the Arts: A Source Book of Arts Experiences for School Age Child Care Programs Developed for Florida's At-Risk Children

Y1 - 1990/07/24/

N1 - Availability - Level 1 - Available online, if indexed January 1993 onward

SuppNotes - For a source book for pre-kindergarten programs, see PS 019 466

Last updated - 2012-12-14

KW - ERIC,Resources in Education (RIE)

KW - Teachers

KW - Administrators

KW - Practitioners

KW - Elementary Education

KW - Music Activities

KW - Dance

KW - At Risk Persons

KW - Dramatic Play

KW - Lesson Plans

KW - After School Programs

KW - School Age Day Care

KW - Learning Activities

KW - Elementary School Curriculum

KW - Art Activities

KW - ERIC

RP - NOT IN FILE

SP - 139

PB - Florida Department of Education, c/o Melvyn Lord, Educational Materials, Collins Building, Room B1, Tallahassee, FL 32399-0400 (\$2.00; Florida residents must add 7% sales tax).

N2 - Designed to assist administrators and teachers conducting child care programs for school-age at-risk children, this curriculum guide outlines age-appropriate, process-oriented arts experiences. Content focuses on learning activities in the visual arts, dance/creative movement, drama, and music. Each section includes all or several of the following subsections: (1) comments on age-appropriate activities; (2) guidelines for implementing activities; (3) outlines of lessons; (4) suggestions concerning community resources; (5) guidelines on creating a space for activities; (6) recommendations on supplies; (7) lists of materials and bibliographic resources; and (8) sheet music. Lesson plans state objectives, list materials, advise on the preparation and demonstration of the activity, and discuss motivating children to participate. Individual sections also intermittently include suggestions on organizing an activity center and/or elaborating the activity in subsequent lessons. (RH)

UR - <http://search.proquest.com/docview/62989970?accountid=14701>

ER -

TY - GEN

ID - 957

T1 - Children and the Arts: A Source Book of Arts Experiences for Pre-Kindergarten Early Intervention Programs Developed for Florida's At-Risk Children

Y1 - 1990///

N1 - Availability - Level 1 - Available online, if indexed January 1993 onward

SuppNotes - For a source book for school age programs, see PS 019 467

Last updated - 2012-12-14

KW - Florida

KW - ERIC,Resources in Education (RIE)

KW - Teachers

KW - Administrators

KW - Practitioners

KW - Preschool Education

KW - Preschool Curriculum

KW - Music Activities

KW - Dance

KW - At Risk Persons

KW - Dramatic Play

KW - Lesson Plans

KW - Learning Activities

KW - Art Activities

KW - ERIC

RP - NOT IN FILE

SP - 101

PB - Florida Department of Education, c/o Melvyn Lord, Educational Materials, Collins Building, Room B1, Tallahassee, FL 32399-0400 (\$2.00; Florida residents must add 7% sales tax).

N2 - Designed to assist administrators and teachers conducting prekindergarten early intervention programs for at-risk children, this curriculum guide outlines age-appropriate arts experiences that are process-oriented rather than product-oriented. After introductory statements, content focuses on learning activities in the visual arts, dance/creative movement, drama, and music. Each section includes all or several of the following subsections: (1) comments on age-appropriate activities; (2) guidelines for implementing activities; (3) outlines of lessons; (4) suggestions concerning community resources; (5) guidelines for creating a space for activities; (6) recommendations on supplies; (7) lists of materials and bibliographic resources; and (8) sheet music. Lesson plans provide objectives, list materials, advise on preparation and demonstration of the activity, and suggest methods to increase children's participation. Individual sections also intermittently include suggestions on modifying the lesson for older children, organizing an activity center, and/or elaborating the activity in subsequent lessons. (RH)

UR - <http://search.proquest.com/docview/62975858?accountid=14701>

ER -

TY - GEN

ID - 958

T1 - International High/Scope Registry Conference Proceedings (Ypsilanti, Michigan, May 8-11, 1996)

Y1 - 1996///

N1 - Availability - Level 2 - Produced in microfiche (1966-2003)

SuppNotes - For 1994 proceedings, see ED 383 406

Last updated - 2012-12-14

KW - China

KW - High Scope Model

KW - Project Head Start

KW - Romania

KW - ERIC,Resources in Education (RIE)

KW - Early Childhood Education

KW - Teacher Student Relationship

KW - High Risk Students

KW - Motor Development

KW - Motion

KW - Multicultural Education

KW - Professional Development

KW - Multiple Intelligences

KW - Conflict Resolution

KW - Student Centered Curriculum

KW - Classroom Techniques

KW - Curriculum Development

KW - Music

KW - Emergent Literacy

KW - Play

KW - Parent Teacher Cooperation

KW - Special Needs Students

KW - Painting (Visual Arts)

KW - Language Arts

KW - Foreign Countries

KW - Parent Student Relationship

KW - Freehand Drawing

KW - Behavior Modification

KW - Story Telling

KW - Active Learning

KW - ERIC

RP - NOT IN FILE

SP - 244

PB - High/Scope Educational Research Foundation, 600 North River Street, Ypsilanti, MI 48198-2898.

N2 - These conference proceedings provide summaries of 66 presentations on various aspects of the High/Scope active learning approach for high-risk students, as well as related topics. Topics addressed include: (1) real-life problem solving; (2) songs in daily routines; (3) open-ended art materials; (4) transition strategies; (5) recall ideas for special young learners; (6) adapting child interests into classroom activities; (7) outside play; (8) active learning and High/Scope approach for children with disabilities; (9) plan-do-review process; (10) proposal writing; (11) conflict resolution; (12) infant and toddler temperaments and exploration; (13) meeting parents' educational expectations; (14) integrating language arts; (15) developing emerging literacy goals; (16) using children's perceptions in center evaluation; (17) play; (18) computerized Child Observation Record (COR); (19) High/Scope program beyond grade three; (20) adult-child interaction; (21) painting and drawing; (22) storytelling; (23) new activity possibilities; (24) motor control; (25) behavior modification; (26) classroom transition; (27) parent child and parent teacher roles; (28) multicultural perspective in education; (29) Chinese and Romanian cultural activities; (30) Training of Trainers (TOT) project; (31) High/Scope Program Implementation Profile (PIP); (32) High/Scope at home; (33) Head Start staff development; (34) curriculum models; (35) observation/feedback; (36) multiple intelligences; (37) re-endorsement assessment strategies; (38) positive reinforcement; (39) movement and music series; and (40) small group activities. (SD)

UR - <http://search.proquest.com/docview/62570640?accountid=14701>

ER -

TY - RPRT

ID - 959

T1 - Full-Day Kindergarten: The Need for Quality

Y1 - 2008/08//

N1 - Last updated - 2013-03-04

KW - Colorado

KW - ERIC,Resources in Education (RIE)

KW - Early Childhood Education

KW - Kindergarten

KW - Preschool Education

KW - Vocabulary Development

KW - Program Effectiveness

KW - Play

KW - Cognitive Development

KW - State Legislation

KW - Young Children

KW - Cooperation

KW - School Schedules

KW - Vocabulary Skills

KW - Conflict Resolution

KW - Emotional Development

KW - Peer Relationship

KW - At Risk Students

KW - Early Intervention

KW - Social Development

KW - standards

KW - Learning Activities

KW - School Readiness

KW - Teaching Methods

KW - Educational Quality

KW - ERIC

RP - NOT IN FILE

SP - 4

PB - Colorado Children's Campaign. 1580 Lincoln Street Suite 420, Denver, CO 80203.

N2 - Because of the substantial impact on outcomes for children, states and school districts across the country are addressing issues surrounding early learning opportunities and school readiness for young children. Full-day kindergarten plays an important role in both. Colorado has made significant investments in full-day kindergarten as a means of providing high-quality education opportunities to young children, and better preparing them for success throughout their academic careers. Colorado has made a strong commitment to early learning opportunities through the Colorado Preschool Program (CPP) and, with House Bill 08-1388, a substantial investment in full-day kindergarten. CPP provides high-quality learning opportunities for preschool and kindergarten children who have the greatest social and economic need. As the Colorado Preschool Kindergarten Program (CPKP) shifts its full-day kindergarten slots to preschool, once again becoming the CPP, and CPKP standards are no longer required for full-day kindergarten, it is important for districts to consider the design and implementation of high-quality full-day kindergarten programs. Full-day kindergarten is also a key element of the commitment Colorado Governor Bill Ritter has made to the development of a preschool through postsecondary, or P-20, education system. A report from the National Institute for Early Education Research (NIEER) indicates children in full-day kindergarten programs spend more time engaged in valuable learning activities than children in half-day kindergarten programs. Results from empirical research suggest children in full-day kindergarten programs spend: (1) 57 minutes per day in self-selected activities, as opposed to 32 minutes per day for half-day kindergarten students; and (2) 16 percent less time in large-group, teacher-directed activities, and seven percent more time in child-initiated learning activities than half-day kindergarten children. Research has shown that both self-selected and child-initiated activities have long-term benefits on children's learning by promoting cognitive and social-emotional development. Center-based and child-directed play time helps children develop vocabulary skills, increase cooperation with peers, practice handling conflict and develop positive approaches to learning. (Contains 7 footnotes.)

UR - <http://search.proquest.com/docview/1314311150?accountid=14701>

ER -

TY - RPRT

ID - 960

T1 - WWC Quick Review of the Article "Promoting Broad and Stable Improvements in Low-Income Children's Numerical Knowledge Through Playing Number Board Games"

Y1 - 2008/08//

N1 - Last updated - 2012-12-14

KW - ERIC,Resources in Education (RIE)

KW - Early Childhood Education

KW - High Risk Students

KW - Play

KW - Family Influence

KW - Low Income

KW - Numeracy

KW - Improvement

KW - Correlation

KW - Number Concepts

KW - Computation

KW - Educational Games

KW - Disadvantaged Youth

KW - Preschool Children

KW - ERIC

RP - NOT IN FILE

SP - 1

PB - What Works Clearinghouse. P.O. Box 2393, Princeton, NJ 08543-2393.

N2 - This review examined a study designed to evaluate whether playing number board games improved numeracy skills of low-income preschoolers. The study included 136 pre-school children from 10 urban Head Start centers: 72 children were randomly selected to play a number board game with a trained experimenter; the remaining 64 children played a different version of the game using colors instead of numbers. Numeracy skills were assessed at the end of a two-week period and again nine weeks later. Study authors reported that children

who played the number game had better counting and number identification skills than children who played the color game. Children who played the number game were also better at picking the highest number from a pair of numbers and identifying positions on a number line. The effects persisted nine weeks after the game sessions ended. The review reports that the research described in the study is consistent with What Works Clearinghouse (WWC) evidence standards with reservations. The study was recognized as a well implemented randomized control trial. Cautionary statements regarding results are included. Twelve children from the initial sample of 136 were dropped from the analysis, including four who were assigned to play the number game and eight who were assigned to play the color game. In addition, children who played the number game had higher baseline scores on most outcome measures. Although these differences were not statistically significant, they may contribute to the higher scores reported in the follow-up period for children who played the number game. [The following report was the focus of this "Quick Review": Promoting Broad and Stable Improvements in Low-Income Children's Numerical Knowledge Through Playing Number Board Games. "Child Development," 79(2), 375-394. Geetha B. Ramani and Robert S. Siegler (EJ789398).]

UR - <http://search.proquest.com/docview/61985338?accountid=14701>

ER -

TY - GEN

ID - 961

T1 - Playgrounds & Toxic Threats

Y1 - 2010///

N1 - Last updated - 2012-12-14

KW - ERIC,Resources in Education (RIE)

KW - Parents

KW - Play

KW - Public Health

KW - Federal Legislation

KW - State Legislation

KW - Hazardous Materials

KW - Playgrounds

KW - Neighborhoods

KW - Risk Management

KW - School Safety

KW - Child Safety

KW - Laws

KW - ERIC

RP - NOT IN FILE

SP - 6

PB - Healthy Schools Network, Inc. 773 Madison Avenue 1st Floor, Albany, NY 12208. Tel: 518-462-0632:

Fax: 518-462-0433; Web site: <http://www.healthyschools.org>

N2 - Neighborhood and school playgrounds are places that kids play, get fit and make friends. Individuals expect playgrounds to be safe and clean environments for children to play in. However, too many playgrounds across America have unsafe play equipment and are not well-maintained. Some may pose environmental health hazards such as the ones discussed in this guide. Children are more vulnerable to environmental health hazards because their bodies are still growing. Proportionally, they eat, drink, and breathe more per pound of body weight than adults. Children like to explore, which can expose them to more environmental threats than adults. But, they also do not know how to identify and protect themselves from these hazards. This guide discusses the following: what parents and schools can do to ensure safety in playgrounds; current federal and state laws governing toxic playground materials; and health concerns associated with each type of risk

UR - <http://search.proquest.com/docview/815957889?accountid=14701>

ER -

TY - GEN

ID - 962

T1 - Proceedings of the International Association for Development of the Information Society (IADIS)

International Conference on Cognition and Exploratory Learning in Digital Age (CELDA) (Madrid, Spain,

October 19-21, 2012)

Y1 - 2012/10//

N1 - Last updated - 2013-07-02

ER -

TY - JOUR

ID - 963

T1 - Students' Attitudes toward an After-School Physical Activity Programme

A1 - Agbuga,Bulent

A1 - Xiang,Ping

A1 - McBride,Ron

Y1 - 2013/02//

N1 - Last updated - 2013-07-02

SubjectsTermNotLitGenreText - 7840 126; 10181 730; 8033 730; 3736 9146 126; 309 8331; 728 6447; 3363

10278 8016 4542; 8535 6447; 5472 3629 6582; 7940 126; 4270 126; 715; 695 694 8016 4542

KW - Texas

KW - ERIC,Current Index to Journals in Education (CIJE)

KW - Grade 3

KW - Grade 4

KW - Grade 5

KW - Grade 6

KW - Elementary School Students

KW - Play

KW - Questionnaires

KW - After School Programs

KW - Attendance

KW - At Risk Students

KW - Physical Activities

KW - Positive Attitudes

KW - Student Attitudes

KW - Games

KW - Interviews

KW - Attitude Measures

KW - Extracurricular Activities

KW - ERIC

RP - NOT IN FILE

SP - 91

EP - 109

JF - European Physical Education Review

VL - 19

IS - 1

PB - SAGE Publications. 2455 Teller Road, Thousand Oaks, CA 91320.

N2 - Though considerable research on student attitudes has been conducted in physical education, little information exists concerning student attitudes toward after-school physical activity programmes. This study assessed students' attitudes toward their after-school physical activity programme located in southwest Texas, USA. Participants included 158 students in grades three to six, with ages ranging from eight to 12 years. They completed a five-item attitude questionnaire drawn from the attitude literature. Twenty students were also randomly selected and interviewed individually. Both the questionnaire and interview data indicated students in this study had positive attitudes toward their after-school physical activity programme. The interview data further revealed that students had positive attitudes primarily because they had fun, played a variety of games, and benefited from participation in the physical activities. Students' attitudes were also examined in relation to their attendance of the programme. No significant relationship was found between the two variables. (Contains 2 tables and 1 figure.)

SN - 1356-336X, 1356-336X

UR - <http://search.proquest.com/docview/1373086109?accountid=14701>

ER -

TY - BOOK

ID - 965

T1 - Improving Your Reflective Practice through Stories of Practitioner Research. Pen Green Books for Early Years Educators

A1 - Arnold,Cath

Y1 - 2012/05/21/

N1 - Last updated - 2012-12-14

KW - ERIC,Resources in Education (RIE)

KW - Practitioners

KW - Researchers

KW - Adult Education

KW - Early Childhood Education

KW - Preschool Education

KW - Teacher Researchers

KW - Preschool Teachers

KW - Play

KW - Young Children

KW - Teacher Improvement

KW - Research Projects

KW - Classroom Techniques

KW - Teacher Effectiveness

KW - Risk

KW - Adult Learning

KW - Imagination

KW - Leadership Effectiveness

KW - Physical Environment

KW - Video Technology

KW - Parent Participation

KW - Reflective Teaching

KW - Interpersonal Relationship

KW - Child Care Centers

KW - Educational Technology

KW - Photography

KW - Educational Research

KW - Teaching Methods

KW - ERIC

RP - NOT IN FILE

SP - 216

PB - Routledge, Taylor & Francis Group. 7625 Empire Drive, Florence, KY 41042.

N2 - "Improving Your Reflective Practice through Stories of Practitioner Research" shows how research has informed and created effective and valuable reflective practice in early years education, and offers depth to the arguments for a research-orientated stance to this vital field of study. This thought-provoking text explores and documents a variety of small-scale practitioner research projects from the home and early years settings. The stories are centred around real life for children, families and workers and offer practical ideas and support for early years students around the world. They engage in some of the most current debates in early childhood education today, such as: (1) how to support children as individuals; (2) how young children learn and how parents support their learning; (3) how to lead and facilitate change in a way that does not take power away from children, parents or workers; (4) how to support children in taking risks; and (5) how to support parents in returning to learning. Throughout this book, the "Pen Green" attitude to practitioner research is actively encouraged. This involves fostering curiosity, being open to the views of others, questioning the "taken for granted," making the implicit explicit and reflecting on one's daily work. Any practitioner research in early years education and care will draw inspiration from this accessible and supportive text. This book begins with an introduction by Cath Arnold. Chapters include: (1) Treasuring Millie: Millie's Use of Treasure Baskets (Elaine Grant); (2) One Child's Use of a Story as a Transitional Object (Gina Goody); (3) Young Children's Use of Digital Cameras to Share Home at Nursery: Bridges of Shared Understanding (Clare Knight); (4) "Is Breaking a Leg just Another Experience?"--Using Video to gain a Bi-cultural Perspective of Risk-Taking in the



Natural Environment (Suzanne Taylor); (5) How can we provide an optimal learning environment for young children's imaginative play? (David Westmore); (6) Knowing Individual Children Through Involving Their Parents (Janette Harcus); (7) Acorns to Oaks: Growing Leadership in Community Nurseries (Ana Sevilla); (8) Effective Leadership, Effective Learning--It's All About Relationships (Gill Allen); and (9) Learning to return: What supports adults to return to learning? (Anne Gladstone). Conclusion by Cath Arnold

SN - 9780415697293

UR - <http://search.proquest.com/docview/1031154437?accountid=14701>

ER -

TY - JOUR

ID - 966

T1 - Extending Classwide Social Skills Interventions to At-Risk Minority Students: A Preliminary Application of Randomization Tests Combined with Single-Subject Design Methodology

A1 - Bardon,Lisa A.

A1 - Dona,Daria Paul

A1 - Symons, Frank J.

Y1 - 2008/05//

N1 - Last updated - 2012-12-14

SubjectsTermNotLitGenreText - 278 1474 316 8016 4542 293 7160; 7940 126; 5470; 8721; 6716 8016 4542; 9925 3150; 5446 1970 1; 2941 2700 9804 9351 5964; 4420 5264; 2221 909; 695 694 8016 4542; 4954

KW - ERIC,Current Index to Journals in Education (CIJE)

KW - Elementary Education

KW - Grade 3

KW - Special Education

KW - Play

KW - Cooperation

KW - Intervention

KW - Referral

KW - Identification

KW - At Risk Students

KW - Minority Groups

KW - African American Children

KW - Interpersonal Competence

KW - Disproportionate Representation

KW - ERIC

RP - NOT IN FILE

SP - 141

EP - 152

JF - Behavioral Disorders

VL - 33

IS - 3

PB - Council for Children with Behavioral Disorders. Council for Exceptional Children, 1110 North Glebe Road, Arlington, VA 22201-5704.

N2 - Disproportionate representation of minority students in special education programs is a continuing issue of concern. A social emotional curriculum, the Promoting Alternative Thinking Strategies (PATHS), was implemented in a classwide and curricular-integrated format with initial effects evaluated for 3 third-grade African American children identified as at risk for special education referral. Effects were examined using direct observations of each target child's cooperative play in a multiple-baseline design across subjects with intervention onset randomized. Visual and randomization test analyses showed increased cooperative play associated with the PATHS intervention. The combined design and analysis may serve as a viable response-to-intervention approach for reducing referral assessment bias of at-risk minority students. Benefits and limitations of the analysis methods and the PATHS intervention are discussed. (Contains 1 figure.)

SN - 0198-7429, 0198-7429

UR - <http://search.proquest.com/docview/742864174?accountid=14701>

ER -

TY - JOUR

ID - 967

T1 - Is Attachment at Ages 1, 6 and 16 Related to Autonomy and Relatedness Behavior of Adolescents in Interaction towards Their Mothers?

A1 - Becker-Stoll,Fabienne

A1 - Fremmer-Bombik,Elisabeth

A1 - Wartner,Ulrike

A1 - Zimmermann,Peter

A1 - Grossmann,Klaus E.

Y1 - 2008///

N1 - Last updated - 2012-12-14

SubjectsTermNotLitGenreText - 6823 3932 8016 4542 7577 3816; 5118 11655 1474 316 8016 4542; 8996; 714 909; 197 316 8016 4542; 5348 8768; 11205; 312 5054 2842; 7736; 7537 3851 5449 8768; 1474 316 8016 4542; 694 8016 4542; 2267 10087 2574 3629 6582; 7940 126; 1443 5053 2787; 4109 4335; 7921; 7147 1849

KW - Adult Attachment Interview

KW - Germany

KW - ERIC,Current Index to Journals in Education (CIJE)

KW - At Risk Persons

KW - Interaction

KW - Play

KW - Mothers

KW - Correlation

KW - CHILDREN

KW - Vacations

KW - Risk

KW - Nonverbal Communication

KW - Foreign Countries

KW - Parent Child Relationship

KW - Planning

KW - Child Development

KW - Personal Autonomy

KW - Age Differences

KW - Adolescents

KW - Attachment Behavior

KW - Infants

KW - ERIC

RP - NOT IN FILE

SP - 372

EP - 380

JF - International Journal of Behavioral Development

VL - 32

IS - 5

PB - SAGE Publications. 2455 Teller Road, Thousand Oaks, CA 91320.

N2 - This study investigates whether attachment quality at ages 1, 6 and 16 is related to autonomy and relatedness behavior in adolescence. In a follow-up of the Regensburg Longitudinal Study, forty-three 16-year-old adolescents and their mothers were assessed in a revealed differences task and a planning a vacation task. Attachment was assessed during infancy using the Ainsworth Strange Situation and at age six with the reunion procedure. Adolescent attachment representation was assessed using the Adult Attachment Interview. Results provided no evidence for significant continuity between infant or childhood attachment behavior and adolescent attachment representation. Instability of attachment organization, however, was linked to a higher number of experienced risk factors. Substantial relations between adolescent attachment representation and adolescent autonomy and relatedness behavior were found in both interaction tasks with their mothers. Further, significant relations between attachment qualities at ages 1 and 6 and adolescent interaction behavior during the planning a vacation task at age 16 were found. Thus, independent of attachment stability or instability, both early attachment in infancy and childhood and concurrent attachment representation were significantly related to autonomy and relatedness behavior in adolescence. (Contains 4 tables.)

SN - 0165-0254, 0165-0254

UR - <http://search.proquest.com/docview/61969486?accountid=14701>

ER -

TY - JOUR

ID - 968

T1 - Practice Makes Poorer: Practice Gambling Modes and Their Effects on Real-Play in Simulated Roulette

A1 - Bednarz, Jana

A1 - Delfabbro, Paul

A1 - King, Daniel

Y1 - 2013/06//

N1 - Last updated - 2013-07-02

SubjectsTermNotLitGenreText - 141 9458 909 913 2877; 7729 909; 7940 126; 2035 4270 126; 2057 9651 6582; 8996

KW - ERIC, Current Index to Journals in Education (CIJE)

KW - Addictive Behavior

KW - Risk

KW - Computer Simulation

KW - Play

KW - Persistence

KW - Computer Games

KW - ERIC

RP - NOT IN FILE

SP - 381

EP - 395

JF - International Journal of Mental Health and Addiction

VL - 11

IS - 3

PB - Springer. 233 Spring Street, New York, NY 10013.

N2 - The aim of this study was to examine the role of free-play modes on gambling behaviour in computer-based roulette. Eighty participants were randomly allocated to one of four pre-exposure conditions: no exposure (control group), a loss condition, a break-even and a profit condition in which the return to player was greater than 100%. Behavioural persistence and betting behaviour was subsequently monitored in a period of regular roulette play. The results showed that players given opportunities for free-play sessions bet significantly more per spin and wagered more credits in total than the control group, although no significant group differences in behavioural persistence were observed. The results suggest that the role of free-play modes, as they commonly appear on some Internet gaming sites, may need to be investigated further because of their potential role in altering player perceptions of the activity and their influence on risk-taking behaviour

SN - 1557-1874, 1557-1874

UR - <http://search.proquest.com/docview/1373083546?accountid=14701>

ER -

TY - GEN

ID - 969

T1 - Among the Periodicals

A1 - Bell, Michael J.

Y1 - 1994///

N1 - Last updated - 2012-12-14

KW - Journal Articles

KW - Not at Risk Persons

KW - Outcome Based Education

KW - Story Problems

KW - Vygotsky (Lev S)

KW - ERIC, Current Index to Journals in Education (CIJE)

KW - At Risk Persons

KW - Elementary School Students

KW - Deafness

KW - Play

KW - Creative Thinking

KW - Periodicals

KW - Parent Child Relationship

KW - Childrens Literature

KW - Outcomes of Education

KW - ERIC

RP - NOT IN FILE

SP - 53

EP - 54

JF - Childhood Education

VL - 71

IS - 1

N2 - Reviews four journal articles on the following topics: (1) children's creative solutions to realistic and fanciful story problems; (2) Vygotskian perspectives on deafness and mother-child interaction; (3) outcomes-based education; and (4) the differences in play activities of at-risk and not-at-risk elementary school children. (TJQ)

UR - <http://search.proquest.com/docview/62728970?accountid=14701>

ER -

TY - THES

ID - 970

T1 - The Effects of the Project Approach on Children in Inclusive Early Childhood Classrooms

A1 - Beneke,Sallee Jean

Y1 - 2010///

N1 - Last updated - 2012-12-14

SubjectsTermNotLitGenreText - 11655 1474 316 8016 4542; 2877; 8299; 695 694 8016 4542; 5449 8768; 5748 11228 1703 5053 2787; 916 8234; 5015; 7940 126; 11325; 5072 9937 8331; 6734 8852 6582; 7234; 5472 3629 6582

IdentKeywords - Mean Length of Utterance

KW - Mean Length of Utterance

KW - ERIC,Resources in Education (RIE)

KW - Early Childhood Education

KW - Program Effectiveness

KW - Play

KW - Language Acquisition

KW - Young Children

KW - Mixed Methods Research

KW - Vocabulary

KW - Observation

KW - Behavior Problems

KW - At Risk Students

KW - Disabilities

KW - Inclusion

KW - Interviews

KW - Individualized Education Programs

KW - Interpersonal Relationship

KW - ERIC

RP - NOT IN FILE

SP - 240

N2 - Research on the impact of the Project Approach on young children with disabilities or children who are at-risk is limited. Mixed methods were used to study the impact of the Project Approach on the social interactions, challenging behaviors, and language development of eight focal children in two inclusive classrooms. Child participants were two children with IEPs and two children identified as at-risk from each class. Adult participants were six professionals who received high quality supports to implement the Project Approach.

Adults were interviewed prior to the beginning of the study and again mid-, and post-implementation. Choice time observations were videotaped twice per week over 14 weeks to assess the impact of the Project Approach on play levels and MLU[subscript m]. Results revealed that social interactions, challenging behaviors, vocabulary, MLU[subscript m], were positively impacted following implementation of the Project Approach. Limitations of the study and suggestions for research and practice are discussed. [The dissertation citations contained here are published with the permission of ProQuest LLC. Further reproduction is prohibited without permission. Copies of dissertations may be obtained by Telephone (800) 1-800-521-0600. Web page: <http://www.proquest.com/en-US/products/dissertations/individuals.shtml>.]

SN - 9781124636009

UR - [https://www.ideals.illinois.edu/bitstream/handle/2142/18283/Beneke\\_Sallee.pdf?sequence=1](https://www.ideals.illinois.edu/bitstream/handle/2142/18283/Beneke_Sallee.pdf?sequence=1)

ER -

TY - GEN

ID - 971

T1 - Play as the Vehicle for Early Intervention with At-Risk Infants and Toddlers

A1 - Bergen,Doris

Y1 - 1991/04//

N1 - Availability - Level 1 - Available online, if indexed January 1993 onward

SuppNotes - Paper presented at the Annual Conference of the American Educational Research Association (Chicago, IL, April 3-7, 1991)

Last updated - 2012-12-14

KW - Developmental Delays

KW - Developmental Sequences

KW - Play Based Assessment

KW - ERIC,Resources in Education (RIE)

KW - Preschool Education

KW - Developmental Disabilities

KW - At Risk Persons

KW - Toddlers

KW - Special Education

KW - Play

KW - Young Children

KW - Evaluation Methods

KW - Prevention

KW - Parent Child Relationship

KW - Perceptual Motor Learning

KW - Early Intervention

KW - Child Development

KW - Pretend Play

KW - Infants

KW - ERIC

RP - NOT IN FILE

SP - 48

N2 - This paper reviews the current literature on the suggested uses of play for assessment, prevention, and intervention with special needs children. The paper also uses case studies to illustrate the ways play is being used to facilitate achievement of early intervention goals and discusses advantages and disadvantages of these uses of play. The play-based model of assessment involves observation of children's sensorimotor, symbolic, and social play by a transdisciplinary team. Parents are taught directive or playful techniques that minimize problems that arise from dysfunctional parent-child interaction patterns, and thus prevent developmental delays on the part of at-risk children. The use of play for educational intervention involves the development of play skills as a planned part of a curriculum and the incorporation of playful approaches for mastery of skills in other domains, such as language or social skills. This paper defines play and addresses questions about what constitutes play in play-based assessment, in parent-child social interaction, and in play intervention. Appendix 1 describes the three assessments used as examples in the text, and Appendix 2 presents additional examples of prevention and intervention through play. (BC)

UR - <http://search.proquest.com/docview/63004775?accountid=14701>

ER -

TY - JOUR

ID - 973

T1 - Play Therapy in Elementary Schools: A Best Practice for Improving Academic Achievement

A1 - Blanco, Pedro J.

A1 - Ray, Dee C.

Y1 - 2011///

N1 - Last updated - 2012-12-14

SubjectsTermNotLitGenreText - 3698 4542 8852 6582; 2207 4542 8852 6582; 7940 126; 28 96; 107 10789 6447; 4413 5264; 7941 10836 10839 8699; 3363 10278 8016 4542; 695 694 8016 4542; 8299; 7455; 98 4999; 1955 3629 6582; 5470

KW - ERIC, Current Index to Journals in Education (CIJE)

KW - Elementary Education

KW - Grade 1

KW - Program Effectiveness

KW - Elementary School Students

KW - Play

KW - Academic Achievement

KW - Intervention

KW - Experimental Groups

KW - Achievement Gains

KW - Outcomes of Treatment

KW - Comparative Analysis

KW - Play Therapy

KW - At Risk Students

KW - Control Groups

KW - Achievement Tests

KW - ERIC

RP - NOT IN FILE

SP - 235

EP - 243

JF - Journal of Counseling & Development

VL - 89

IS - 2

PB - American Counseling Association. 5999 Stevenson Avenue, Alexandria, VA 22304.

N2 - This pilot study of 1st graders who are academically at risk examined the effectiveness of child-centered play therapy (CCPT). The experimental group received biweekly, 30-minute play therapy sessions for 8 weeks. Findings indicated that these 1st graders participating in CCPT (n = 21) demonstrated a statistically significant increase on the Early Achievement Composite of the Young Children's Achievement Test (Hresko, Peak, Herron, & Bridges, 2000) when compared with children in the control group (n = 20). Results support using CCPT as an intervention for academic achievement

SN - 0748-9633, 0748-9633

UR - <http://search.proquest.com/docview/881453660?accountid=14701>

ER -

TY - GEN

ID - 974

T1 - Risk and Reality: Teaching Preschool Children Affected by Substance Abuse

A1 - Brady, Joanne P.

A1 - Grollman, Sharon

Y1 - 1994///

N1 - Availability - Level 1 - Available online, if indexed January 1993 onward

SuppNotes - For a related research review, see ED 397 986. Companion videotape not available from ERIC.

Also funded by the Office of the Assistant Secretary for Elementary and Secondary Education (ED)

Last updated - 2012-12-14

- KW - Risk Factors
- KW - ERIC,Resources in Education (RIE)
- KW - Practitioners
- KW - Teachers
- KW - Preschool Education
- KW - Teacher Student Relationship
- KW - High Risk Students
- KW - Family Environment
- KW - Parent Teacher Cooperation
- KW - Classroom Environment
- KW - Dramatic Play
- KW - Cooperation
- KW - Developmental Delays
- KW - Educational Improvement
- KW - Behavior Problems
- KW - Classroom Techniques
- KW - Learning Problems
- KW - Fetal Alcohol Syndrome
- KW - Student Needs
- KW - Portfolio Assessment
- KW - Student Evaluation
- KW - Student Behavior
- KW - ERIC
- RP - NOT IN FILE
- SP - 79
- PB - Head Start Information and Publication Center, 1133 15th St., N.W., Suite 450, Washington, DC 20005 (guide: \$2.50; videotape: \$5).
- N2 - In recent years, preschool and elementary school teachers have noted increases in behavior concerns and developmental delays, possibly caused by prenatal drug or alcohol exposure. This document notes that it is more important to ascertain the children's challenges than the causes. It describes the most promising practices identified for improving the learning of children at risk, whatever the reason. These are: (1) creating a nurturing classroom environment; (2) encouraging cooperative play; (3) facilitating classroom transitions and minimizing distractions; (4) helping children manage their behaviors; (5) conducting ongoing classroom assessment; and (6) building strong ties with families. The guide features a companion videotape. (Contains 43 resources.) (HTH)
- UR - <http://search.proquest.com/docview/62237343?accountid=14701>
- ER -
  
- TY - GEN
- ID - 975
- T1 - How to Nurture Early Literacy
- A1 - Britsch,Susan
- Y1 - 1993///
- N1 - Last updated - 2012-12-14
- KW - ERIC,Current Index to Journals in Education (CIJE)
- KW - Teachers
- KW - Practitioners
- KW - Early Childhood Education
- KW - Teacher Role
- KW - Teacher Student Relationship
- KW - High Risk Students
- KW - Play
- KW - Language Acquisition
- KW - Language Skills
- KW - Language Arts
- KW - Early Reading
- KW - Prereading Experience

KW - Beginning Reading

KW - Freehand Drawing

KW - Emergent Literacy

KW - Early Experience

KW - ERIC

RP - NOT IN FILE

SP - 47

EP - 51

JF - Instructor

VL - 103

IS - 4

N2 - Presents some suggestions for nurturing and supporting emergent readers and writers (e.g., recognize drawing as an important step in early literacy, engage children in conversations about their daily experiences). Also presents an interview with two authors on the special literacy needs of students with major instabilities in their lives. (SM)

UR - <http://search.proquest.com/docview/62795602?accountid=14701>

ER -

TY - JOUR

ID - 977

T1 - Guided Dramatization: Fostering Social Development in Children with Disabilities

A1 - Brown,Mac H.

Y1 - 1993///

N1 - Last updated - 2012-12-14

SubjectsTermNotLitGenreText - 1375 7054 7848 2877 2118; Disabilities 2877; Dramatic Play 3005 9021 9651 6582; 3085 3150; 4723; 5449 8768; 5727 9306 5241; Mainstreaming 6250 7912; 7676 5449 8768; Preschool Children 8127 11655 1474 316 8016 4542; 8295; Social Development 9753 5053 2787; 9934 10278 8016 4542; Teacher Guidance 10522 4552

KW - Normal Children

KW - South Carolina

KW - ERIC,Current Index to Journals in Education (CIJE)

KW - Early Childhood Education

KW - Program Descriptions

KW - High Risk Students

KW - Teacher Guidance

KW - Special Needs Students

KW - Dramatic Play

KW - Mainstreaming

KW - Peer Relationship

KW - Laboratory Schools

KW - Cerebral Palsy

KW - Disabilities

KW - Social Development

KW - Preschool Children

KW - Interpersonal Relationship

KW - ERIC

RP - NOT IN FILE

SP - 68

EP - 71

JF - Young Children

VL - 48

IS - 2

N2 - Describes and illustrates a technique for using guided dramatization in intervention with special needs or at-risk children. Discusses social benefits of the technique. Maintains that the technique is useful for helping mainstreamed children socially integrate into the regular classroom. (BG)

SN - 0044-0728, 0044-0728



UR - <http://search.proquest.com/docview/62872392?accountid=14701>

ER -

TY - JOUR

ID - 978

T1 - Relations between Behavior Problems in Classroom Social and Learning Situations and Peer Social Competence in Head Start and Kindergarten

A1 - Bulotsky-Shearer, Rebecca J.

A1 - Dominguez, Ximena

A1 - Bell, Elizabeth R.

A1 - Rouse, Heather L.

A1 - Fantuzzo, John W.

Y1 - 2010/12//

N1 - Last updated - 2012-12-14

SubjectsTermNotLitGenreText - 916 8234; 7940 126; 2888 2883 8016 4542 11658 316; 7635 6886 10087 2574 3629 6582; 5649 5264; 5446 1970 1; 695 694 8016 4542; 7676 5449 8768; 3386 5053 2787; 1443 5053 2787; 11182 9306 5241; 8127 11655 1474 316 8016 4542; 312 5054 2842; 8099

KW - ERIC, Current Index to Journals in Education (CIJE)

KW - Early Childhood Education

KW - Kindergarten

KW - Preschool Education

KW - Play

KW - Urban Schools

KW - Behavior Problems

KW - Emotional Development

KW - Peer Relationship

KW - At Risk Students

KW - Interpersonal Competence

KW - Child Development

KW - Disadvantaged Youth

KW - Preschool Children

KW - Path Analysis

KW - Age Differences

KW - Predictor Variables

KW - ERIC

RP - NOT IN FILE

SP - 195

EP - 210

JF - Journal of Emotional and Behavioral Disorders

VL - 18

IS - 4

PB - SAGE Publications and Hammill Institute on Disabilities. 2455 Teller Road, Thousand Oaks, CA 91320.

N2 - The relations between early emotional and behavioral problems in classroom situations and peer social competence were examined for a representative sample of urban Head Start children. Behavior problems were assessed within the context of routine peer, teacher, and structured learning classroom situations early in the preschool year. Two path models were tested: (a) direct effects of preschool situational problems on peer social competence at the end of preschool and (b) direct and indirect effects of preschool situational problems on peer social competence at the end of kindergarten, accounting for preschool peer social competence and child demographic variables. Early problems in peer and socially mediated learning situations consistently predicted lower peer social competence in preschool and kindergarten. Problems in preschool peer situations directly and indirectly predicted greater disruptive play at the end of kindergarten, and problems in structured learning situations predicted lower interactive play at both time points. Implications for policy and practice are discussed. (Contains 1 note, 2 tables, and 2 figures.)

SN - 1063-4266, 1063-4266

UR - <http://search.proquest.com/docview/822507674?accountid=14701>

ER -

TY - JOUR

ID - 980

T1 - Designing a Children's Water Garden as an Outdoor Learning Lab for Environmental Education

A1 - Byrd,Renee K.

A1 - Haque,Mary Taylor

A1 - Tai,Lolly

A1 - McLellan,Gina K.

A1 - Knight,Erin Jordan

Y1 - 2007///

N1 - Last updated - 2012-12-14

SubjectsTermNotLitGenreText - 11421; 3521 3150; 1806 10278 8016 4542; 9552 3692 5882; 5895 3199 3760 5719; 4274 359 10669; 7458 3150; 5719 3760; 3692 5882; 7940 126; 4848 359 10669; 11416; 309 8331; 3363 10278 8016 4542; 695 694 8016 4542; 4070

KW - South Carolina

KW - ERIC,Current Index to Journals in Education (CIJE)

KW - Elementary Education

KW - Grade 3

KW - Grade 4

KW - Grade 5

KW - Higher Education

KW - Elementary School Students

KW - Floriculture

KW - Play

KW - Environmental Education

KW - After School Programs

KW - Laboratories

KW - Water Quality

KW - Horticulture

KW - Learning Laboratories

KW - Water

KW - Gardening

KW - At Risk Students

KW - Experiential Learning

KW - Service Learning

KW - College Students

KW - Outdoor Education

KW - ERIC

RP - NOT IN FILE

SP - 39

EP - 47

JF - Applied Environmental Education and Communication

VL - 6

IS - 1

PB - Routledge. , 325 Chestnut Street Suite 800, Philadelphia, PA 19106.

N2 - A Clemson University introductory landscape design class collaborated with South Carolina Botanical Gardens (SCBG) staff and coordinators of Sprouting Wings to design an exploratory Children's Garden within the SCBG. Service learning provides students with invaluable real-world experiences solving problems and interacting with clients while contributing to the local community. Project methodology included research, site selection and analysis, conceptual diagrams, preliminary designs, and full-color renderings of final designs. Based on children's desire for water play and on current issues in water quality and the need for environmental education, clients and students designed a Wonders of Water Garden that can be used as a model at other institutions. The design celebrates the beauty of water, and showcases the integral relationships among plants, wildlife, and water. The interactive garden will create awareness of current water quality issues, promote environmental stewardship, and serve as a model to teach visitors of all ages the vital role water plays in the environment. (Contains 1 table and 2 figures.)

SN - 1533-015X, 1533-015X

UR - <http://search.proquest.com/docview/742883768?accountid=14701>

ER -

TY - JOUR

ID - 982

T1 - Resilient Youths Use Humor to Enhance Socioemotional Functioning during a "Day in the Life"

A1 - Cameron,Leslie E.

A1 - Fox,Janice D.

A1 - Anderson,Michelle S.

A1 - Cameron,Catherine Ann

Y1 - 2010/09//

N1 - Last updated - 2012-12-14

SubjectsTermNotLitGenreText - 3967 5746 6111; 3083 316 8016 4542; 4923; 8901; 694 8016 4542; 8852 6582; 3990 7119 6362 11302; 9761 3518; 7940 126; 9015; 5445 1849; 4203 5449 8768; 3851 5449 8768

KW - ERIC,Current Index to Journals in Education (CIJE)

KW - At Risk Persons

KW - Play

KW - Research Methodology

KW - Early Adolescents

KW - Family Relationship

KW - Figurative Language

KW - Friendship

KW - Humor

KW - Resilience (Psychology)

KW - Interpersonal Communication

KW - Role

KW - Social Environment

KW - Films

KW - ERIC

RP - NOT IN FILE

SP - 716

EP - 742

JF - Journal of Adolescent Research

VL - 25

IS - 5

PB - SAGE Publications. 2455 Teller Road, Thousand Oaks, CA 91320.

N2 - In order to extend previous early years humor research into early adolescence, the authors adapted an innovative ecological research method such that at-risk adolescents could be filmed during an entire waking day in their life. Community youth advocates nominated one 15-year-old female and one 14-year-old male as doing well despite adverse circumstances. We examined the types and functions of these youths' humor within their social contexts. Their humor included joking, teasing, physical play, light tones, irony, sarcasm, and mocking/parody. Humor served many socioemotional roles, such as navigating complex socially sensitive topics and situations, and facilitating affiliation with friends and family. Humor assists in traversing challenging social terrain and can serve as a protective factor under risky circumstances. (Contains 3 tables.)

SN - 0743-5584, 0743-5584

UR - <http://search.proquest.com/docview/754911578?accountid=14701>

ER -

TY - GEN

ID - 984

T1 - Baby Talk. First Years Together. Project Enlightenment

A1 - Carothers,Linda

A1 - Wilson,Val

Y1 - 1986///

N1 - Availability - Level 2 - Produced in microfiche (1966-2003)

SuppNotes - For related documents, see EC 202 488-497. Document printed on colored paper

Last updated - 2012-12-14

KW - Early Intervention

KW - First Years Together (Project)

KW - ERIC,Resources in Education (RIE)

KW - Parents

KW - Parent Education

KW - Play

KW - High Risk Persons

KW - Discipline

KW - Pregnancy

KW - Hospitalized Children

KW - Safety Education

KW - Self Esteem

KW - Premature Infants

KW - Parent Child Relationship

KW - Infant Behavior

KW - Developmental Stages

KW - Child Development

KW - Activities

KW - ERIC

RP - NOT IN FILE

SP - 43

PB - Project Enlightenment, 501 S. Boylan Ave., Raleigh, NC 27603 (\$3.00).

N2 - This series of 19 newsletters is designed to be distributed monthly to parents of premature or high risk infants on their child's adjusted age birthday from birth through 18 months. Each newsletter describes activities and behaviors of infants and toddlers appropriate to the month of age and discusses issues of concern to the parents. Regular topics include safety, discipline, and "premie notes," a section that addresses the particular characteristics or problems associated with prematurity and its effect on later development. For ages 3-12 months activities typical of infant behavior or which the baby will enjoy having the parent initiate are listed under the headings of moving, playing, thinking, and communicating. Other topics covered for specific ages include going home from the hospital (newborn), when to call the doctor (2 months), settling into a routine (3 months), the father's role (6 months), communicating (11 months), and imitation (12 months). Additional newsletters focus on such topics as thinking about another pregnancy, play as learning, setting limits for toddlers, and encouraging self-esteem. (VW)

UR - <http://search.proquest.com/docview/63144819?accountid=14701>

ER -

TY - RPRT

ID - 985

T1 - Prekindergarten Program Process Evaluation Report, 1990-91

A1 - Claus,Richard N.

A1 - Quimper,Barry E.

Y1 - 1991/02//

N1 - Availability - Level 1 - Available online, if indexed January 1993 onward

SuppNotes - For 1988-89 report, see ED 305 180; for 1989-90 report, see ED 316 317

Last updated - 2012-12-14

KW - Education Consolidation Improvement Act Chapter 1

KW - Saginaw City School System MI

KW - ERIC,Resources in Education (RIE)

KW - Preschool Education

KW - Program Effectiveness

KW - High Risk Students

KW - Play

KW - Cognitive Development

KW - Language Skills  
KW - Program Improvement  
KW - Classroom Observation Techniques  
KW - Parent Participation  
KW - Program Evaluation  
KW - Compensatory Education  
KW - Check Lists  
KW - Psychomotor Skills  
KW - Preschool Children  
KW - School Readiness  
KW - ERIC  
RP - NOT IN FILE  
SP - 30

N2 - During the first half of the 1990-91 school year, 446 children were served by the Chapter 1 Prekindergarten Program of the Saginaw, Michigan school district. A process evaluation was conducted to monitor the program and assess whether it was being implemented as planned. This year, the process evaluation consisted of half-day classroom observations of the classes of each of 5 new kindergarten teachers in 13 buildings. An activity checklist and observation instrument focused primarily on the implementation of the cognitive, psychomotor, and parent participation and education activities of the program, and secondarily on object labeling and language enhancement techniques in the classroom. Observations revealed that: (1) except for grouping and regrouping, and activities related to properties of objects, activities to meet daily objectives were taking place in all classrooms; (2) a record of parent participation was maintained in all classrooms; (3) labels were posted on objects throughout the classrooms in an effort to assist in word recognition; (4) teachers used language enhancement techniques, but with wide variation in frequency; and (5) a wide variation of methods for scheduling free play was observed. The program is operating as planned, but some areas could be improved. Recommendations for addressing these areas are suggested. Appendices provide a list of participants, a sample activity observation checklist, and a table displaying frequency of teachers' use of language enhancement techniques. (BC)

UR - <http://search.proquest.com/docview/63003249?accountid=14701>

ER -

TY - RPRT

ID - 986

T1 - Prekindergarten Program Process Evaluation Report, 1992-93

A1 - Claus, Richard N.

A1 - Quimper, Barry E.

Y1 - 1992/12//

N1 - Availability - Level 1 - Available online, if indexed January 1993 onward

SuppNotes - For the 1991-92 report, see ED 343 673

Last updated - 2012-12-14

KW - Education Consolidation Improvement Act Chapter 1

KW - Saginaw City School System MI

KW - ERIC, Resources in Education (RIE)

KW - Preschool Education

KW - Program Effectiveness

KW - High Risk Students

KW - Play

KW - Cognitive Development

KW - Language Skills

KW - Emotional Development

KW - Formative Evaluation

KW - Program Improvement

KW - Classroom Observation Techniques

KW - Parent Participation

KW - Program Evaluation

KW - Compensatory Education

KW - Check Lists

KW - Psychomotor Skills

KW - Preschool Children

KW - School Readiness

KW - ERIC

RP - NOT IN FILE

SP - 33

N2 - By December of the 1992-93 school year, 433 children were being served by the Chapter 1 Prekindergarten Program of the Saginaw, Michigan school district. A process evaluation was conducted to monitor the program and assess whether the program was being implemented as planned. The process evaluation consisted of a half-day classroom observation in 14 classrooms. An activity checklist and observation instrument were used to determine whether cognitive, psychomotor, parent participation, and education activities were being carried out and to explore classroom practices and teacher behaviors for encouraging pupils' language behavior. Observations revealed that: (1) activities to meet the program's daily objectives took place in all classrooms; (2) a record of parent participation was maintained in all classrooms; (3) labels were posted on objects throughout the classrooms to assist in word recognition; and (4) teachers used language production and enhancement techniques. Overall, the program was operating as planned. Suggestions for improving some areas of the program are offered. Appendixes include a list of program participants, copies of the activity checklist and observation instrument, and a table listing teachers' use of language production and enhancement techniques. (MM)

UR - <http://search.proquest.com/docview/62869843?accountid=14701>

ER -

TY - RPRT

ID - 987

T1 - Prekindergarten Program Process Evaluation Report, 1991-92

A1 - Claus, Richard N.

A1 - Quimper, Barry E.

Y1 - 1992/02//

N1 - Availability - Level 1 - Available online, if indexed January 1993 onward

SuppNotes - For 1988-89 report, see ED 305 180; for 1989-90 report, see ED 316 317, for 1990-91 report, see ED 330 449

Last updated - 2012-12-14

KW - Education Consolidation Improvement Act Chapter 1

KW - Saginaw City School System MI

KW - ERIC, Resources in Education (RIE)

KW - Preschool Education

KW - Program Effectiveness

KW - High Risk Students

KW - Play

KW - Cognitive Development

KW - Language Skills

KW - Emotional Development

KW - Formative Evaluation

KW - Program Improvement

KW - Classroom Observation Techniques

KW - Parent Participation

KW - Program Evaluation

KW - Compensatory Education

KW - Check Lists

KW - Psychomotor Skills

KW - Preschool Children

KW - School Readiness

KW - ERIC

RP - NOT IN FILE

SP - 30

N2 - By January of the 1991-92 school year, 428 children were being served by the Chapter 1 Prekindergarten Program of the Saginaw, Michigan school district. A process evaluation was conducted to monitor the program and assess whether the program was being implemented as planned. The process evaluation for this year consisted of a half-day classroom observation in 13 classrooms. An activity checklist and observation instrument were used to determine whether cognitive, psychomotor, parent participation, and education activities were being carried out and to explore classroom practices and teacher behaviors for encouraging pupils' language behavior. Observations revealed that: (1) activities to meet the program's daily objectives took place in all classrooms; (2) a record of parent participation was maintained in all classrooms; (3) labels were placed on objects throughout the classrooms to assist in word recognition; and (4) teachers used language enhancement techniques. Overall, the program was operating as planned. Suggestions for improving some areas of the program are offered. Appendixes include a list of program participants, copies of the activity checklist and observation instrument, and a table listing teachers' use of language enhancement techniques. (BC)

UR - <http://search.proquest.com/docview/62929931?accountid=14701>

ER -

TY - JOUR

ID - 988

T1 - Second-Impact Syndrome

A1 - Cobb,Sarah

A1 - Battin,Barbara

Y1 - 2004///

N1 - Last updated - 2012-12-14

SubjectsTermNotLitGenreText - 7940 126; 9241 9247 3417 8016 4542 5703 4908 8917 7207 4657 8267; 4630 5183 2877; 197 316 8016 4542; 4566; 1132 4890; 694 8016 4542; 704 7840 126; 698 8016 4542; 9015; 4659 4635 126; 8168; 4738 9419 10278 8016 4542; 1806 10278 8016 4542

KW - ERIC,Current Index to Journals in Education (CIJE)

KW - High Schools

KW - Higher Education

KW - Athletics

KW - At Risk Persons

KW - Play

KW - Guidelines

KW - Brain

KW - Head Injuries

KW - Health Promotion

KW - Prevention

KW - College Students

KW - Role

KW - High School Students

KW - School Nurses

KW - Adolescents

KW - Athletes

KW - ERIC

RP - NOT IN FILE

SP - 262

EP - 267

JF - Journal of School Nursing

JA - J Sch Nurs

VL - 20

IS - 5

PB - SAGE Publications. 2455 Teller Road, Thousand Oaks, CA 91320.

N2 - Sports-related injuries are among the more common causes of injury in adolescents that can result in concussion and its sequelae, postconcussion syndrome and second-impact syndrome (SIS). Students who experience multiple brain injuries within a short period of time (hours, days, or weeks) may suffer catastrophic or fatal reactions related to SIS. Adolescents are particularly susceptible to the dangers of SIS, and current return-to-play guidelines may be too lenient to protect a student from SIS. Any student with signs of a

concussion should receive medical evaluation and not be allowed to return to play in the current game or practice. The role of the school nurse includes being knowledgeable about management of head injuries and return-to-play guidelines, providing follow-up for athletes who have concussions, and providing education on prevention and management of head injuries. (Contains 5 tables.)

SN - 1059-8405, 1059-8405

UR - <http://search.proquest.com/docview/742876358?accountid=14701>

ER -

TY - JOUR

ID - 989

T1 - Outcomes and Stages of Child-Centered Play Therapy for a Child with Highly Disruptive Behavior Driven by Self-Concept Issues

A1 - Cochran,Jeff L.

A1 - Cochran,Nancy H.

A1 - Fuss,Angela

A1 - Nordling,William J.

Y1 - 2010//

N1 - Last updated - 2012-12-14

SubjectsTermNotLitGenreText - 1404 8697; 7940 126; 9466 9469 9451; 1432 909; 914 2094; 7941 10836 10839 8699; 916 8234; 9451; 7676 5449 8768; 5470; 694 8016 4542; 2302 6582; 7455; 6265 8016 4542; 2293

KW - Child Behavior Checklist

KW - ERIC,Current Index to Journals in Education (CIJE)

KW - At Risk Persons

KW - Play

KW - Child Behavior

KW - MALES

KW - Intervention

KW - Behavior Problems

KW - Outcomes of Treatment

KW - Peer Relationship

KW - Play Therapy

KW - Counseling Techniques

KW - Self Concept

KW - Behavior Modification

KW - Counseling Effectiveness

KW - Self Efficacy

KW - Check Lists

KW - ERIC

RP - NOT IN FILE

SP - 231

EP - 246

JF - Journal of Humanistic Counseling, Education and Development

VL - 49

IS - 2

PB - American Counseling Association. 5999 Stevenson Avenue, Alexandria, VA 22304.

N2 - Children with highly disruptive behavior present problems for their peers and are often a heavy burden to the schools, teachers, counselors, and other adults who care for them. Without successful intervention, such children certainly face lives of high risk, emotional pain, and ever-increasing difficulty; from a humanistic perspective, such an outcome would present the loss of personal, social, and academic potential. Aggressive disruptive behavior of children is the most common presenting problem area for psychotherapists, including play therapists. Play therapy, especially child-centered play therapy (CCPT), has demonstrated effectiveness across a wide range of children's mental health and behavioral problems, from developing self-efficacy to recovering from trauma and major clinical concerns. Descriptions in this case study of child-centered play therapy (CCPT) for a boy referred for highly disruptive behavior include observations of his process through stages of CCPT, teacher and parent ratings on the Child Behavior Checklist, and explanations of how CCPT worked for him. (Contains 2 tables.)



SN - 0735-6846, 0735-6846

UR - <http://search.proquest.com/docview/762466740?accountid=14701>

ER -

TY - GEN

ID - 992

T1 - Fool's Gold: A Critical Look at Computers in Childhood

A1 - Cordes, Colleen

A1 - Miller, Edward

Y1 - 2000//

N1 - Availability - Level 1 - Available online, if indexed January 1993 onward

Last updated - 2012-12-14

KW - Brain Development

KW - ERIC, Resources in Education (RIE)

KW - Early Childhood Education

KW - Elementary Education

KW - At Risk Persons

KW - Play

KW - Cognitive Development

KW - Computers

KW - Child Health

KW - Brain

KW - Childhood Needs

KW - Creativity

KW - CHILDREN

KW - Moral Development

KW - Computer Uses in Education

KW - Emotional Development

KW - Social Development

KW - Early Experience

KW - Educational Technology

KW - ERIC

RP - NOT IN FILE

SP - 105

PB - Alliance for Childhood, P.O. Box 444, College Park, MD 20741; Tel: 301-513-1777; Fax: 301-513-1777; e-mail: [info@allianceforchildhood.net](mailto:info@allianceforchildhood.net); Web Site: <http://www.allianceforchildhood.net> (\$8.50).

N2 - Noting that computers are reshaping children's lives in profound and unexpected ways, this report examines potential harms and promised benefits of these changes, focusing on early childhood and elementary education. Chapter 1 argues that popular attempts to hurry children intellectually are at odds with the natural pace of human development. Chapter 2 presents information on the risks of using computers to children's physical health (including musculoskeletal injuries, vision problems, and obesity), emotional and social development (isolation, shifts toward computer-centered education, detachment from community, and the commercialization of childhood), creativity and intellectual development (impaired language and literacy, poor concentration, inability to tolerate frustration, plagiarism, and distraction from meaning), and moral development. Chapter 3 urges families and schools to recommit themselves to providing young children with the essentials of a healthy childhood, including strong bonds with caring adults, hands-on experiences with the physical world, time for unstructured play, exposure to the arts, and literacy activities. Chapter 4 discusses ways parents and teachers can help children achieve a technology literacy that also involves the capacity to think critically and use technology to serve personal, social, and ecological goals. Chapter 5 focuses on the costs of technology and argues that the national infatuation with computers in early childhood and elementary education is diverting scarce resources from children's real unmet needs. Chapter 6 concludes with recommendations, including a refocus on the essentials of a healthy childhood and an immediate moratorium on further introduction of computers in early childhood and elementary education. Each chapter contains reference notes.

(KB)

UR - <http://search.proquest.com/docview/62320480?accountid=14701>

ER -

TY - RPRT

ID - 993

T1 - Early Intervention: Examples of Practice. Averroes Programmes for Children - An Experience to be Shared. Action Research in Family and Early Childhood Series. UNESCO Education Section Monograph No. 8

A1 - Cordus,Joyce

A1 - van Oudenhoven,Nico

Y1 - 1997/10//

N1 - Availability - Level 1 - Available online, if indexed January 1993 onward

Last updated - 2012-12-14

KW - Averroes Foundation (Netherlands)

KW - High Scope Model

KW - Netherlands

KW - UNESCO

KW - ERIC,Resources in Education (RIE)

KW - Early Childhood Education

KW - Preschool Education

KW - Program Descriptions

KW - Parent Education

KW - Caregiver Child Relationship

KW - Parenting Skills

KW - At Risk Persons

KW - Reading

KW - Play

KW - Action Research

KW - CHILDREN

KW - Foreign Countries

KW - Home Programs

KW - Transitional Programs

KW - Parent School Relationship

KW - Child Rearing

KW - Parent Participation

KW - Early Intervention

KW - ERIC

RP - NOT IN FILE

SP - 21

VL - ED-97/WS/55

PB - Early Childhood and Family Education Unit, ED/BAS/ECF, UNESCO, 7 Place de Fontenoy, 75352, Paris 07 SP, France.

N2 - Since 1995, UNESCO and the Averroes Foundation have collaborated to develop early childhood education programs. This report describes Averroes intervention programs currently used in the Netherlands with young at-risk children. Following a Foreword which describes various UNESCO early childhood activities, the report is divided into six parts. Part 1 provides background on early intervention program development in the Netherlands. Part 2 describes how intermediary agencies can connect effectively with researchers, policymakers, practitioners, and families. Part 3 describes the Averroes programs: (1) "Instapje," to improve the quality of caregiver-child interactions; (2) "Klimrek," a home-visit program to stimulate verbal interaction between parents and children; (3) "Spel ann Huis," a home-based program to stimulate play development in 1- to 4-year-olds; (4) "Opstapje," to facilitate transitions from home to elementary school for disadvantaged 2- to 4-year-olds; (5) "Opstap Opnieuw," a home-based extra-curriculum for disadvantaged 4- to 6-year-old children and their parents; (6) "Overstap," focusing on collaboration between school, parents, and children during the process of learning to read; (7) "Stap door," a continuation of the Overstap program for second and fifth graders; (8) "Stap rond," a parent education program for caregivers of children from birth to 6 years of age; and (9) "Kaleidoscoop," the Dutch version of the American High/Scope program. Part 4 discusses the limited value in using educational models as the basis for program development and presents key principles for developing intervention programs. Part 5 concerns lessons Averroes has learned in disseminating programs to large numbers. Part 6 discusses the relationship between home-based and center-based intervention strategies. (KB)

UR - <http://search.proquest.com/docview/62542880?accountid=14701>

ER -

TY - JOUR

ID - 995

T1 - What Happened to Kindergarten?

A1 - Curwood,Jen Scott

Y1 - 2007/08//

N1 - Last updated - 2012-12-14

SubjectsTermNotLitGenreText - 5649 5264; 11655 1474 316 8016 4542; 1443 5053 2787; 60 10031; 4723; 8233 1710; 7940 126; 10227 6996

KW - ERIC,Current Index to Journals in Education (CIJE)

KW - Teachers

KW - Kindergarten

KW - High Risk Students

KW - Play

KW - Young Children

KW - Student Needs

KW - Child Development

KW - Problem Solving

KW - Academic Standards

KW - ERIC

RP - NOT IN FILE

SP - 28

EP - 30

JF - Instructor

VL - 117

IS - 1

PB - Scholastic. 557 Broadway, New York, NY 10012.

N2 - This article deals with the increasing academic pressure facing five-year-old children who are in kindergarten schools in the U.S. Part of the reason kindergarten is becoming more and more academic is a growing understanding of the importance of early learning and the capabilities of young children. Proponents of ramping up standards in early elementary education tend to focus on the numbers: more children learning to read or do math sooner must be good. These achievements, however, may come at the expense of other skills children need to learn, such as self-reliance, problem-solving, and spatial thinking. According to Anne Stoudt, a kindergarten teacher, the risk is children who are already burned out on school by the time they reach third grade. Play is how children learn, so, there should be more of it in the upper grades, not less in the lower

SN - 1049-5851, 1049-5851

UR - <http://search.proquest.com/docview/61957264?accountid=14701>

ER -

TY - JOUR

ID - 996

T1 - Exposure to Media Violence and Other Correlates of Aggressive Behavior in Preschool Children

A1 - Daly,Laura A.

A1 - Perez,Linda M.

Y1 - 2009///

N1 - Last updated - 2012-12-14

SubjectsTermNotLitGenreText - 7940 126; 8372 9738 909; 11282 545 9738 909; 324 545 9738 909; 695 694 8016 4542; 8127 11655 1474 316 8016 4542; 8292; 6878 8751 10087 2574 3629 6582; 6363; 2267 10087 2574 3629 6582; 545 9738 909; 10717 126; 9457 909; 7546 5127; 312 5054 2842; 6823 3932 8016 4542 7577 3816; 3830 3518; 4290; 3896 7577 3816 8016 4542 6265; 11227 1849; 7234

KW - California

KW - Early Childhood Environment Rating Scale (Revised)

KW - ERIC,Current Index to Journals in Education (CIJE)

KW - Family Environment

KW - Play  
KW - Multiple Regression Analysis  
KW - Gender Differences  
KW - Parent Influence  
KW - Mothers  
KW - Observation  
KW - Correlation  
KW - Fathers  
KW - Violence  
KW - Antisocial Behavior  
KW - Mass Media Effects  
KW - Verbal Communication  
KW - At Risk Students  
KW - Television Viewing  
KW - Program Content  
KW - Preschool Children  
KW - Aggression  
KW - Self Control  
KW - Prosocial Behavior  
KW - Age Differences  
KW - ERIC  
RP - NOT IN FILE  
SP - 13  
JF - Early Childhood Research & Practice  
VL - 11  
IS - 2  
PB - Clearinghouse on Early Education and Parenting, University of Illinois at Urbana-Champaign. 51 Gerty Drive, Champaign, IL 61820.  
N2 - This article examines the play behavior of 70 preschool children and its relationship to television violence and regulatory status. Linear regression analysis showed that violent program content and poor self-regulation were independently and significantly associated with overall and physical aggression. Advanced maternal age and child age and better self-regulation were independently and significantly associated with prosocial behavior. According to t-test analysis, two other statistically significant factors associated with overall aggression were gender and the lack of a father figure in the home. Analysis of t-tests showed a statistically significant relationship between children who watched violent content alone and verbal aggression. Multiple regression analysis established that poor self-regulation was the biggest predictor of overall aggression and that overall aggression was significantly related to gender. Results suggest limiting the amount of violent programming that preschool children see. Results also indicate that children benefit from interactive regulatory support. (Contains 5 tables.)  
SN - 1524-5039, 1524-5039  
UR - <http://search.proquest.com/docview/61806862?accountid=14701>  
ER -  
  
TY - JOUR  
ID - 997  
T1 - Relationships among Private Speech and Creativity in Head Start and Low-Socioeconomic Status Preschool Children  
A1 - Daugherty, Martha  
A1 - White, Stephen C.  
Y1 - 2008///  
N1 - Last updated - 2012-12-14  
SubjectsTermNotLitGenreText - 2388 8409 5051; 2888 2883 8016 4542 11658 316; 11655 1474 316 8016 4542; 2391 10789 6447; 8127 11655 1474 316 8016 4542; 2385 1710; 10197 2472 2842 10187; 694 8016 4542; 7940 126; 2177 5127; 9960 1849; 9465 2898; 1710; 9835 10103; 6186 5019  
KW - ERIC, Current Index to Journals in Education (CIJE)  
KW - Early Childhood Education

KW - Context Effect  
KW - At Risk Persons  
KW - Play  
KW - Speech Communication  
KW - Young Children  
KW - Low Income  
KW - Socioeconomic Status  
KW - Student Diversity  
KW - Creativity  
KW - Cognitive Processes  
KW - Creative Thinking  
KW - Creativity Tests  
KW - Disadvantaged Youth  
KW - Self Disclosure (Individuals)  
KW - Preschool Children

KW - ERIC  
RP - NOT IN FILE

SP - 30  
EP - 39  
JF - Gifted Child Quarterly  
VL - 52

IS - 1  
PB - SAGE Publications. 2455 Teller Road, Thousand Oaks, CA 91320.

N2 - The purpose of this study was to explore Vygotsky's notion of private speech as a cognitive self-regulatory process and how it related to creativity measures among at-risk children. Thirty-two Head Start and state-funded Pre-K children completed the Torrance creativity test Thinking Creatively in Action and Movement (TCAM). The children's private speech was collected in an open play context and while children completed structured logical--mathematical activities. Results revealed that both originality and fluency creativity were related to self-direction private speech and grand total private speech. Findings support that cognitive self-regulating private speech may be related to creative thinking and that private speech may offer a method for assessing early creative thinking in children from various cultural and economic backgrounds. (Contains 4 tables.)

SN - 0016-9862, 0016-9862  
UR - <http://search.proquest.com/docview/61971185?accountid=14701>  
ER -

TY - JOUR  
ID - 1000

T1 - Rodent ultrasonic communication: Male prosocial 50-kHz ultrasonic vocalizations elicit social approach behavior in female rats (*Rattus norvegicus*)

A1 - Willadsen,M.  
A1 - Seffer,D.  
A1 - Schwarting,R.K.  
A1 - Wohr,M.

Y1 - 2014/02//  
N1 - Willadsen, Maria. Seffer, Dominik. Schwarting, Rainer K W. Wohr, Markus  
Journal of comparative psychology (Washington, D.C. : 1983)  
0414613, 8309850, dmq

IM  
Journal Article  
English  
KW - Medline  
KW - Rough and Tumble  
RP - NOT IN FILE

SP - 56  
EP - 64  
JF - Journal of Comparative Psychology

JA - J Comp Psychol.

VL - 128

IS - 1

CY - United States

N2 - Rats emit distinct types of ultrasonic vocalizations (USV), which serve as situation-dependent affective signals with important communicative functions. Low-frequency 22-kHz USV typically occur in aversive situations, such as social defeat, whereas high-frequency 50-kHz USV can be observed in appetitive situations, like rough-and-tumble-play in juveniles or mating in adults. The 2 main USV types serve distinct communicative functions and induce call-specific behavioral responses in the receiver. While 22-kHz USV probably serve as alarm calls, 50-kHz USV appear to serve a prosocial communicative function in the sexual and the nonsexual context. In the sexual context, however, this view has recently been challenged by playback studies where only very limited behavioral changes were observed in response to prosocial 50-kHz USV. The aim of the present study was therefore to test whether female rats display social approach behavior in response to male prosocial 50-kHz USV by means of our established playback paradigm. To this aim, we exposed female rats to playback of the following 2 acoustic stimuli: (a) natural male 50-kHz USV and (b) time- and amplitude-matched white noise, with the latter serving as acoustic control for novelty-induced changes in behavior not linked to the communicative function of male prosocial 50-kHz USV. Our present findings show that female rats display high levels of social approach behavior in response to male prosocial 50-kHz USV, but not time- and amplitude-matched white noise, supporting the conclusion that male prosocial 50-kHz USV are likely to play an important role in establishing social proximity and possibly regulate mating behavior. (PsycINFO Database Record (c) 2014 APA, all rights reserved)

SN - 1939-2087

AD - Behavioral Neuroscience, Experimental and Biological Psychology, Philipps-University of Marburg., Behavioral Neuroscience, Experimental and Biological Psychology, Philipps-University of Marburg., Behavioral Neuroscience, Experimental and Biological Psychology, Philipps-University of Marburg., Behavioral Neuroscience, Experimental and Biological Psychology, Philipps-University of Marburg

UR - 24188619

ER -

TY - JOUR

ID - 1001

T1 - First Step to Success Early Intervention Program: A Study of Effectiveness with Native-American Children

A1 - Diken,Ibrahim H.

A1 - Rutherford,Robert B.

Y1 - 2005/11//

N1 - Last updated - 2012-12-14

SubjectsTermNotLitGenreText - 8299; 3090 5470; 10183 909; 7940 126; 4723; 465 10278 8016 4542 467 5046 3602; 916 8234; 914 2094; 10486 909; 7676 5449 8768

KW - ERIC,Current Index to Journals in Education (CIJE)

KW - Students

KW - Early Childhood Education

KW - Program Effectiveness

KW - High Risk Students

KW - Teacher Behavior

KW - Play

KW - Behavior Modification

KW - Early Intervention

KW - American Indian Students

KW - Student Behavior

KW - Behavior Problems

KW - Peer Relationship

KW - ERIC

RP - NOT IN FILE

SP - 444

EP - 465

JF - Education & Treatment of Children

VL - 28

IS - 4

PB - The Roscoe Ledger, P.O. Box 536, Chester & Latta Streets, Roscoe, PA 15477.

N2 - This study examined the effectiveness of the First Step to Success (FSS) early intervention program with four Native-American students, their teachers, and their parents on (a) targeted students' problem behaviors, (b) class-wide student behaviors, and (c) teacher behaviors. Participant teachers and parents were also interviewed to gather their perceptions of the FSS program. The results of direct observations of targeted students' play behaviors on the playground revealed that the FSS program had a significant positive affect on all participant students' social play behaviors. As soon as the intervention started, all participant students' social play behaviors significantly increased and their nonsocial behaviors decreased. All participant students showed higher levels of social play behaviors as soon as the intervention was initiated. Substantial decreases in problem behaviors were also reported by two teachers. Some positive changes in class-wide student behaviors and teacher behaviors were reported by the participant teachers. All but one parent reported significant changes in problem behaviors of targeted students. They all were highly satisfied with the program and rated it as easy to use. Limitations of the study and directions for future research are discussed

SN - 0748-8491, 0748-8491

UR - <http://search.proquest.com/docview/62084121?accountid=14701>

ER -

TY - JOUR

ID - 1002

T1 - Some Misunderstandings of School Readiness

A1 - Elkind,David

Y1 - 2008///

N1 - Last updated - 2012-12-14

SubjectsTermNotLitGenreText - 9261 8620; 5649 5264; 4413 5264; 7196; 6101; 2798; 6725; 7940 126; 4723; 8661 8623 11225 1 5792 9690; 6421 9690 1; 1443 5053 2787

KW - ERIC,Current Index to Journals in Education (CIJE)

KW - Elementary Education

KW - Grade 1

KW - Kindergarten

KW - High Risk Students

KW - Play

KW - Numeracy

KW - Reading Skills

KW - Mathematics Skills

KW - Misconceptions

KW - Developmental Stages

KW - Child Development

KW - Literacy

KW - School Readiness

KW - ERIC

RP - NOT IN FILE

SP - 49

EP - 52

JF - Exchange: The Early Childhood Leaders' Magazine Since 1978

IS - 180

PB - Exchange Press, P.O. Box 3249, Redmond, WA 98073-3249.

N2 - The phrase "school readiness" was, until recently, most often used in connection with a child's preparedness to meet the demands of a first grade classroom. With the contemporary push down of the curriculum, readiness is now taken to mean the child's preparedness to meet the demands of kindergarten. Whether in regard to first grade or kindergarten, this way of thinking assumes that school readiness resides entirely in the child's head. It also assumes that readiness is primarily academic, namely, knowing one's letters and numbers. In addition, readiness is often taken to mean that a child has acquired his or her knowledge of numbers and letters through one or another form of academic instruction. Finally, another interpretation of

readiness is that it is a matter of maturation and is related to age. While all of these ideas about readiness are understandable, they happen to be incorrect. In this article, the author discusses these misunderstandings of what readiness is all about

SN - 0164-8527, 0164-8527

UR - <http://search.proquest.com/docview/61967371?accountid=14701>

ER -

TY - GEN

ID - 1003

T1 - Every Child: The Magazine of the Australian Early Childhood Association, Inc., 2000

A1 - Elliott, Alison

Y1 - 2000///

N1 - Availability - Level 2 - Produced in microfiche (1966-2003)

SuppNotes - Published quarterly

Last updated - 2012-12-14

KW - Australia

KW - Brain Development

KW - Phonological Skills

KW - ERIC, Resources in Education (RIE)

KW - Early Childhood Education

KW - Teacher Student Relationship

KW - Motor Development

KW - Childhood Attitudes

KW - Physical Education

KW - Childhood Interests

KW - Parent School Relationship

KW - Emergent Literacy

KW - Work Environment

KW - Augmentative and Alternative Communication

KW - Enrichment

KW - Teaching Methods

KW - Teacher Researchers

KW - Preschool Teachers

KW - At Risk Persons

KW - Play

KW - Young Children

KW - Brain

KW - Adult Child Relationship

KW - Childhood Needs

KW - Physical Activities

KW - Foreign Countries

KW - Periodicals

KW - Games

KW - ERIC

RP - NOT IN FILE

SP - 146

VL - 6

IS - 1

PB - Publications Section, Australian Early Childhood Association, P.O. Box 105, Watson, ACT 2602, Australia (\$47.20 Australian domestic per year; \$50 Australian, overseas per year). Tel: +(02)-6241-6900; Fax: +(02)-6241-5547; e-mail: [publishing@acea.org](mailto:publishing@acea.org); Web site: <http://www.acea.org.au> (\$47.20, Australia; \$50, Overseas).

N2 - This document is comprised of the four 2000 issues of a periodical published by the Australian Early Childhood Association focusing on the needs of children from birth to 8 years and on issues related to child care and early childhood education in Australia. Each issue features articles focusing on a particular theme along with editorials and regular columns related to research, child health, legal issues, ethics, and professional



development. The Autumn 2000 issue focuses on using brain research in the classroom and includes the following articles: (1) "Infant Brain Research: What Is It and What Does It Mean?" (Pam Linke); and (2) "Stress-Free Environments: Promoting Healthy Brain Development" (Heather Lawrence). The Winter 2000 issue has an Olympics and child health theme and includes the following articles: (1) "Young Children's Views of Australia and Australians" (Sue Dockett); and (2) "The Olympic Games: A Critical Look at What We Teach Children" (Sally Barnes). The Spring 2000 issue highlights visions for children, families, and communities and includes the following articles: (1) "Teaching Young Children: Specialist or Not?" (Glenda MacNaughton); and (2) "Visions of Children and Childhood" (Alison Elliott). The Summer 2000 issue focuses on current issues in early childhood research and practice and includes the following articles: (1) "Should We Teach Young Children To Read?" (Mimi Wellisch); and (2) "Augmentative Communication: Assisting Special Needs Children" (Lynette Duffy). Also part of each issue are a profile of a program providing services for children, book reviews, summaries of recent events in each of the Australian states, and information for use in parent newsletters. (KB)

UR - <http://search.proquest.com/docview/62248533?accountid=14701>

ER -

TY - JOUR

ID - 1004

T1 - Sexual Play: When Should You Be Concerned?

A1 - Essa,Eva L.

A1 - Murray,Colleen I.

Y1 - 1999///

N1 - Last updated - 2012-12-14

SubjectsTermNotLitGenreText - 694 8016 4542; 1432 909; 3085 3150; Play 7940 126; Preschool Children 8127 11655 1474 316 8016 4542; Preschool Teachers 8135 10591 8267 3417 8016 4542 5703 4908 8917; 9588; Sexuality 9591; 10482 730

KW - ERIC,Current Index to Journals in Education (CIJE)

KW - Early Childhood Education

KW - Sexuality

KW - Preschool Teachers

KW - At Risk Persons

KW - Play

KW - Child Behavior

KW - Teacher Attitudes

KW - Preschool Children

KW - Sexual Identity

KW - ERIC

RP - NOT IN FILE

SP - 231

EP - 234

JF - Childhood Education

VL - 75

IS - 4

N2 - Discusses the ambivalence felt by early-childhood teachers about young children's sexual behaviors. Focuses on the importance of context in understanding normal sexual development in young children and specific behaviors that might signal an underlying problem. Presents a continuum of young children's sexual behaviors, ranging from normal to pathological and provides tips for distinguishing inappropriate from normal sexual behavior. (KB)

SN - 0009-4056, 0009-4056

UR - <http://search.proquest.com/docview/62484229?accountid=14701>

ER -

TY - JOUR

ID - 1005

T1 - Adolescent opiate exposure in the female rat induces subtle alterations in maternal care and transgenerational effects on play behavior

A1 - Johnson,N.L.

A1 - Carini,L.

A1 - Schenk,M.E.

A1 - Stewart,M.

A1 - Byrnes,E.M.

Y1 - 2011///

N1 - Johnson, Nicole L. Carini, Lindsay. Schenk, Marian E. Stewart, Michelle. Byrnes, Elizabeth M  
Frontiers in psychiatry

101545006

Journal Article

English

KW - Medline

KW - Rough and Tumble

RP - NOT IN FILE

SP - 29

JF - Frontiers in psychiatry Frontiers Research Foundation

JA - Front Psychiatr

VL - 2

CY - Switzerland

N2 - The non-medical use of prescription opiates, such as Vicodin() and MSContin(), has increased dramatically over the past decade. Of particular concern is the rising popularity of these drugs in adolescent female populations. Use during this critical developmental period could have significant long-term consequences for both the female user as well as potential effects on her future offspring. To address this issue, we have begun modeling adolescent opiate exposure in female rats and have observed significant transgenerational effects despite the fact that all drugs are withdrawn several weeks prior to pregnancy. The purpose of the current set of studies was to determine whether adolescent morphine exposure modifies postpartum care. In addition, we also examined juvenile play behavior in both male and female offspring. The choice of the social play paradigm was based on previous findings demonstrating effects of both postpartum care and opioid activity on play behavior. The findings revealed subtle modifications in the maternal behavior of adolescent morphine-exposed females, primarily related to the amount of time females' spend nursing and in non-nursing contact with their young. In addition, male offspring of adolescent morphine-exposed mothers (MOR-F1) demonstrate decreased rough and tumble play behaviors, with no significant differences in general social behaviors (i.e., social grooming and social exploration). Moreover, there was a tendency toward increased rough and tumble play in MOR-F1 females, demonstrating the sex-specific nature of these effects. Given the importance of the postpartum environment on neurodevelopment, it is possible that modifications in maternal-offspring interactions, related to a history of adolescent opiate exposure, plays a role in the observed transgenerational effects. Overall, these studies indicate that the long-term consequences of adolescent opiate exposure can impact both the female and her future offspring

SN - 1664-0640

AD - Department of Biomedical Science, Cummings School of Veterinary Medicine, Tufts University North Grafton, MA, USA

UR - 21713113

ER -

TY - JOUR

ID - 1006

T1 - The Relation Between Social Support, Infant Risk Status and Mother-Infant Interaction

A1 - Feiring,Candice

Y1 - 1987///

N1 - Last updated - 2012-12-14

SubjectsTermNotLitGenreText - 265 909; High Risk Persons 4722; Infants 5118 11655 1474 316 8016 4542; 5350 8852 6582; 5472 3629 6582; 6823 3932 8016 4542 7577 3816; Parent Child Relationship 7537 3851 5449 8768; 7940 126; Premature Infants 8112 5118 11655 1474 316 8016 4542; Social Networks 9783 7051; Social Support Groups 9813 4542

KW - ERIC,Current Index to Journals in Education (CIJE)

KW - Researchers

KW - Play  
KW - High Risk Persons  
KW - Premature Infants  
KW - Parent Child Relationship  
KW - Mothers  
KW - Affective Behavior  
KW - Social Support Groups  
KW - Social Networks  
KW - Interaction Process Analysis  
KW - Interviews  
KW - Infants  
KW - ERIC  
RP - NOT IN FILE  
SP - 400  
EP - 405  
JF - Developmental Psychology  
JA - Dev.Psychol.  
VL - 23  
IS - 3  
N2 - Mothers from inner-city, poor families with high-risk infants were interviewed when their infants were three months of age concerning sources of support (e.g., fathers, relatives, friends) and types of support received (e.g., goods, services, advice, financial support). Observations of the mother-infant interaction in a free-play setting were also conducted.(Author/BN)  
UR - <http://search.proquest.com/docview/63278193?accountid=14701>  
ER -  
  
TY - JOUR  
ID - 1007  
T1 - Posttraumatic Stress Disorder in Infants and Young Children Exposed to War-Related Trauma  
A1 - Feldman,Ruth  
A1 - Vengrober,Adva  
Y1 - 2011/07//  
N1 - Last updated - 2012-12-14  
SubjectsTermNotLitGenreText - 9813 4542; 6823 3932 8016 4542 7577 3816; 8050 548 6531 2877; 5118 11655 1474 316 8016 4542; 714 909; 4109 4335; 2746 8415; 11405 2112; 10411; 8996; 8901; 2207 4542 8852 6582; 1651 4954; 1474 316 8016 4542; 7940 126; 9697; 11511 8415; 547 8415; 2452 909; 2267 10087 2574 3629 6582; 11465 8522; 5470  
KW - Israel  
KW - ERIC,Current Index to Journals in Education (CIJE)  
KW - Play  
KW - Anxiety  
KW - Clinical Diagnosis  
KW - Depression (Psychology)  
KW - Well Being  
KW - Mothers  
KW - Intervention  
KW - Crying  
KW - Social Support Groups  
KW - Correlation  
KW - CHILDREN  
KW - Risk  
KW - Symptoms (Individual Disorders)  
KW - Control Groups  
KW - Foreign Countries  
KW - Resilience (Psychology)  
KW - War

KW - Sleep

KW - Withdrawal (Psychology)

KW - Posttraumatic Stress Disorder

KW - Attachment Behavior

KW - Infants

KW - ERIC

RP - NOT IN FILE

SP - 645

EP - 658

JF - Journal of the American Academy of Child & Adolescent Psychiatry

JA - J Am Acad.Child Adolesc Psychiatry

VL - 50

IS - 7

PB - Elsevier. 6277 Sea Harbor Drive, Orlando, FL 32887-4800.

N2 - Objective: Although millions of the world's children are growing up amidst armed conflict, little research has described the specific symptom manifestations and relational behavior in young children exposed to wartime trauma or assessed factors that chart pathways of risk and resilience. Method: Participants included 232 Israeli children 1.5 to 5 years of age, 148 living near the Gaza Strip and exposed to daily war-related trauma and 84 controls. Children's symptoms were diagnosed, maternal and child attachment-related behaviors observed during the evocation of traumatic memories, and maternal psychological symptoms and social support were self-reported. Results: PTSD was diagnosed in 37.8% of war-exposed children (n = 56). Children with PTSD exhibited multiple posttraumatic symptoms and substantial developmental regression. Symptoms observed in more than 60% of diagnosed children included nonverbal representation of trauma in play; frequent crying, night waking, and mood shifts; and social withdrawal and object focus. Mothers of children with PTSD reported the highest depression, anxiety, and posttraumatic symptoms and the lowest social support, and displayed the least sensitivity during trauma evocation. Attachment behavior of children in the Exposed-No-PTSD group was characterized by use of secure-base behavior, whereas children with PTSD showed increased behavioral avoidance. Mother's, but not child's, degree of trauma exposure and maternal PTSD correlated with child avoidance. Conclusions: Large proportions of young children exposed to repeated wartime trauma exhibit a severe posttraumatic profile that places their future adaptation at significant risk. Although more resilient children actively seek maternal support, avoidance signals high risk. Maternal well-being, sensitive behavior, and support networks serve as resilience factors and should be the focus of interventions for families of war-exposed infants and children. (Contains 3 figures and 2 tables.)

SN - 0890-8567, 0890-8567

UR - <http://search.proquest.com/docview/964174678?accountid=14701>

ER -

TY - JOUR

ID - 1008

T1 - Delivery Pain and the Development of Mother-Infant Interaction

A1 - Ferber,Sari Goldstein

A1 - Feldman,Ruth

Y1 - 2005///

N1 - Last updated - 2012-12-14

SubjectsTermNotLitGenreText - 7763 8409 5051; 7940 126; 6823 3932 8016 4542 7577 3816; 5118 11655 1474 316 8016 4542; 8996; 6447; 5348 8768; 2746 8415; 547 8415; 7537 3851 5449 8768; 1013; 7496; 8415; 312 5054 2842; 3170 28 96; 4109 4335

KW - Israel

KW - ERIC,Current Index to Journals in Education (CIJE)

KW - Interaction

KW - Measures (Individuals)

KW - Play

KW - Anxiety

KW - Depression (Psychology)

KW - Mothers

KW - Pain

KW - Educational Attainment  
KW - Birth  
KW - Risk  
KW - Personality Traits  
KW - Foreign Countries  
KW - Psychological Patterns  
KW - Parent Child Relationship  
KW - Age Differences  
KW - Infants  
KW - ERIC  
RP - NOT IN FILE  
SP - 43  
EP - 62  
JF - Infancy  
VL - 8  
IS - 1

PB - Psychology Press. , 325 Chestnut Street Suite 800, Philadelphia, PA 19106.

N2 - This study examined delivery pain as a possible risk factor for the development of mother-infant interaction. Eighty-one mothers completed the Pain Catastrophizing Scale, the State-Trait Anxiety Inventory, and the Edinburgh Postnatal Depression Scale. A retrospective evaluation of labor pain was performed using the Visual Analog Scale at 2 days postpartum. Six weeks after birth the mothers were visited at home, completed measures of anxiety and depression, and were observed during a free play session with the infant. The mother's tendency to catastrophize pain predicted lower levels of mother-infant reciprocity at 6 weeks, controlling for maternal age, education, parity, epidural analgesia, pain perception, anxiety, and depression. Trait anxiety was related to lower maternal sensitivity. The mother's tendency to catastrophize pain was discussed in relation to the personality trait of exaggerated emotional perception of pain and its potential interference with the formation of the mother-infant relationship. (Contains 4 tables.)

SN - 1525-0008, 1525-0008

UR - <http://search.proquest.com/docview/61871480?accountid=14701>

ER -

TY - JOUR

ID - 1009

T1 - Parent Training: Can Intervention Improve Parent-Child Interactions?

A1 - Fleming,Darcy

A1 - McDonald,Linda

A1 - Drummond,Jane

A1 - Kysela,Gerald M.

A1 - Watson,Shelley L.

Y1 - 2005///

N1 - Last updated - 2012-12-14

SubjectsTermNotLitGenreText - 2888 2883 8016 4542 11658 316; 10621 3227 6582; 7940 126; 8127 11655 1474 316 8016 4542; 3090 5470; 7540 210 3150; 7537 3851 5449 8768; 8299; 1432 909; 5348 8768; 8058 3132 10103; 4109 4335; 7576 909; 4723

KW - Canada

KW - ERIC,Current Index to Journals in Education (CIJE)

KW - Early Childhood Education

KW - Parent Education

KW - Interaction

KW - Program Effectiveness

KW - High Risk Students

KW - Play

KW - Child Behavior

KW - Parenting Styles

KW - Foreign Countries

KW - Poverty

KW - Parent Child Relationship

KW - Early Intervention

KW - Disadvantaged Youth

KW - Preschool Children

KW - Teaching Methods

KW - ERIC

RP - NOT IN FILE

SP - 77

EP - 100

JF - Exceptionality Education Canada

VL - 15

IS - 2

PB - Exceptionality Education Canada. University of Alberta, Department of Educational Psychology, 6-102 Education North, Edmonton, AB T6G 2G5, Canada.

N2 - The aim of the present study was to determine the effect of the Natural Teaching Strategies (NTS) parent training intervention on parent and child behaviour during free play. A pretest/posttest experimental design was used with families recruited from Head Start programs. Measures of observed behaviour were used to determine the use of contingent responsive and scaffolding strategies by parents during free play with their preschooler. After six months of NTS training, it was found that parents were more positive and responsive to their children and episodes of joint engagement were longer, involving more reciprocity. Therefore, there is evidence that the NTS intervention has potential to support parents to engage their preschool aged children in longer more positive play interactions. (Contains 3 tables and 1 footnote.)

SN - 1183-322X, 1183-322X

UR - <http://search.proquest.com/docview/62008064?accountid=14701>

ER -

TY - JOUR

ID - 1010

T1 - Father Beliefs as a Mediator between Contextual Barriers and Father Involvement

A1 - Freeman, Harry

A1 - Newland, Lisa A.

A1 - Coyl, Diana D.

Y1 - 2008///

N1 - Last updated - 2012-12-14

SubjectsTermNotLitGenreText - 3090 5470; 2888 2883 8016 4542 11658 316; 7576 909; 1459; 8996; 8535 6447; 3896 7577 3816 8016 4542 6265; 7531 730; 874 8234; 7550 7615 909; 11655 1474 316 8016 4542; 9466 9469 9451; 7575 9690 1; 7552 8931; 10866 153 4398; 3864 8768; 7537 3851 5449 8768; 7940 126; 9822

KW - ERIC, Current Index to Journals in Education (CIJE)

KW - Early Childhood Education

KW - Parenting Skills

KW - Play

KW - Barriers

KW - Questionnaires

KW - Family Work Relationship

KW - Young Children

KW - Fathers

KW - SOCIALIZATION

KW - Risk

KW - Parent Responsibility

KW - Parenting Styles

KW - Parent Child Relationship

KW - Child Rearing

KW - Parent Participation

KW - Disadvantaged Youth

KW - Early Intervention

KW - Parent Attitudes

KW - Self Efficacy

KW - Time Management

KW - ERIC

RP - NOT IN FILE

SP - 17

JF - Early Child Development and Care

VL - 178

IS - 7

PB - Routledge. , 325 Chestnut Street Suite 800, Philadelphia, PA 19106.

N2 - Fathers' beliefs were examined as mediators between multiple risk factors and involvement practices with children age zero to five enrolled in Head Start or Early Head Start. A diverse sample of 101 fathers, living in rural Midwestern communities of the USA completed questionnaires assessing "mediators" (i.e. parenting efficacy, role beliefs, and responsibility to an intervention program), "barriers" (e.g. lack of time, energy, work constraints), and "father involvement" (i.e. physical play, didactic engagement, caregiving, socialisation, involvement in the program, and accessibility). In each of the regression models, father efficacy and beliefs reduced the influence of barriers and were significant unique predictors of father involvement. Findings suggest that fathers' beliefs are more proximal to parenting practices than is family context, which have implications for early intervention programs serving children in at-risk families. (Contains 2 tables and 1 note.)

SN - 0300-4430, 0300-4430

UR - <http://search.proquest.com/docview/61957429?accountid=14701>

ER -

TY - JOUR

ID - 1011

T1 - Double helix: reciprocity between juvenile play and brain development. [Review]

A1 - Cooke,B.M.

A1 - Shukla,D.

Y1 - 2011/10//

N1 - Cooke, Bradley M. Shukla, Deep

Developmental cognitive neuroscience

101541838

IM

Journal Article. Review

English

KW - Medline

KW - Rough and Tumble

KW - Adolescent

KW - Adolescent Behavior/ph [Physiology]

KW - Adolescent Behavior/px [Psychology]

KW - Animals

KW - Brain/gd [Growth & Development]

KW - Female

KW - Humans

KW - Male

KW - Nerve Net/gd [Growth & Development]

KW - Play and Playthings/px [Psychology]

KW - Sex Characteristics

KW - Social Behavior

RP - NOT IN FILE

SP - 459

EP - 470

JF - Developmental Cognitive Neuroscience

JA - Dev.Cogn Neurosci

VL - 1

IS - 4

CY - Netherlands

N2 - This review summarizes what is presently known about the function, sexual differentiation, and neural circuitry of juvenile rough-and-tumble play. Juvenile rough-and-tumble play is a unique motivated behavior that is widespread throughout the mammalian order and usually occurs more often in males. Immediate early gene studies indicate that cortical and subcortical circuits, many of which are sensitive to sex steroid hormones, mediate juvenile play. Sex differences in rough-and-tumble play are controlled in part by neonatal exposure to androgens or their estrogenic metabolites. Studies indicate that testicular androgens during play are also necessary to stimulate male-like levels of play initiation. The resemblance of rough-and-tumble play to aggression and sexual behavior has led some to question whether male-typical adult behavior is contingent upon the experience of play. Attempts to control the amount of play through social isolation show that social experience during adolescence is critical for male-typical adult behaviors to be expressed. This well-established finding, together with evidence that play induces neural plasticity, supports the hypothesis that juvenile play contributes to male-typical brain development that ultimately enables the expression of adult social and reproductive behavior. Copyright 2011 Elsevier Ltd. All rights reserved

SN - 1878-9307

AD - Neuroscience Institute, Georgia State University, Atlanta, GA 30303, United States. bcooke@gsu.edu

UR - 22436567

ER -

TY - JOUR

ID - 1012

T1 - Closing the circle between perceptions and behavior: a cybernetic view of behavior and its consequences for studying motivation and development. [Review]

A1 - Pellis,S.M.

A1 - Bell,H.C.

Y1 - 2011/10//

N1 - Pellis, Sergio M. Bell, Heather C

Developmental cognitive neuroscience

101541838

IM

Journal Article. Research Support, Non-U.S. Gov't. Review

English

KW - Medline

KW - Rough and Tumble

KW - Animals

KW - Behavior

KW - Animal/ph [Physiology]

KW - Humans

KW - Motivation/ph [Physiology]

KW - Perception/ph [Physiology]

KW - Play and Playthings/px [Psychology]

KW - Social Behavior

RP - NOT IN FILE

SP - 404

EP - 413

JF - Developmental Cognitive Neuroscience

JA - Dev.Cogn Neurosci

VL - 1

IS - 4

CY - Netherlands

N2 - The dynamic aspect of behavior is exaggerated during social interactions such as sex, combat and rough-and-tumble play where the movements of the two animals involved continually influence one another. The behavioral 'markers' abstracted from this stream can greatly influence the conclusions drawn about the effects of experimental procedures and how changes during development are interpreted. By using methods of analysis that treat behaving systems as being dynamic and governed by negative feedback processes, the behavioral markers that are abstracted can more accurately reflect the underlying mechanisms. Using examples from rats engaged in play fighting, serious fighting and food defense, it is shown that motivational from non-motivational



contributions to behavioral output and changes in that output with age can be discerned. For example, while sex differences in the frequency of initiating play by juvenile rats are shown to reflect differences in the motivation to engage in this behavior, sex differences in preferred motor patterns used during play do not. Rather, they reflect differences in perceptual and motor systems. Although an issue that is often neglected, we show that behavioral description, and the theoretical underpinnings of that description, is critical for the study of the mechanisms that produce and regulate behavior. Copyright 2011 Elsevier Ltd. All rights reserved

SN - 1878-9307

AD - Department of Neuroscience, University of Lethbridge, Lethbridge, Alberta, Canada. pellis@uleth.ca

UR - 22436563

ER -

TY - JOUR

ID - 1013

T1 - The Decline of Play and the Rise of Psychopathology in Children and Adolescents

A1 - Gray, Peter

Y1 - 2011///

N1 - Last updated - 2013-02-26

SubjectsTermNotLitGenreText - 8427 7637 6506 10669 8422 926 9351 5964; 197 316 8016 4542; 2746 8415; 7940 126; 4696; 1474 316 8016 4542; 10324 9458 909 2635; 694 8016 4542; 8415; 1443 5053 2787; 5449 8768; 8233 1710; 6532 4634

KW - ERIC, Current Index to Journals in Education (CIJE)

KW - At Risk Persons

KW - Play

KW - Depression (Psychology)

KW - Suicide

KW - Mental Health

KW - CHILDREN

KW - Helplessness

KW - Problem Solving

KW - Psychological Patterns

KW - Child Development

KW - Psychopathology

KW - Interpersonal Relationship

KW - Adolescents

KW - ERIC

RP - NOT IN FILE

SP - 443

EP - 463

JF - American Journal of Play

VL - 3

IS - 4

PB - The Strong. One Manhattan Square, Rochester, NY 14607.

N2 - Over the past half century, in the United States and other developed nations, children's free play with other children has declined sharply. Over the same period, anxiety, depression, suicide, feelings of helplessness, and narcissism have increased sharply in children, adolescents, and young adults. This article documents these historical changes and contends that the decline in play has contributed to the rise in the psychopathology of young people. Play functions as the major means by which children (1) develop intrinsic interests and competencies; (2) learn how to make decisions, solve problems, exert self-control, and follow rules; (3) learn to regulate their emotions; (4) make friends and learn to get along with others as equals; and (5) experience joy. Through all of these effects, play promotes mental health. (Contains 48 notes and 1 figure.)

SN - 1938-0399, 1938-0399

UR - <http://search.proquest.com/docview/1312420929?accountid=14701>

ER -

TY - JOUR

ID - 1014

T1 - Frequency-modulated 50 kHz ultrasonic vocalizations: a tool for uncovering the molecular substrates of positive affect. [Review]

A1 - Burgdorf, J.

A1 - Panksepp, J.

A1 - Moskal, J.R.

Y1 - 2011/10//

N1 - Burgdorf, Jeffrey. Panksepp, Jaak. Moskal, Joseph R

Neuroscience and biobehavioral reviews

oa7, 7806090

IM

Journal Article. Research Support, Non-U.S. Gov't. Review

English

KW - Medline

KW - Rough and Tumble

KW - Affect/ph [Physiology]

KW - Animals

KW - Brain/ph [Physiology]

KW - Breeding

KW - Humans

KW - Male

KW - Molecular Biology

KW - Pleasure/ph [Physiology]

KW - Rats

KW - Long-Evans

KW - Social Isolation

KW - Ultrasonics

KW - Vocalization

KW - Animal/ph [Physiology]

RP - NOT IN FILE

SP - 1831

EP - 1836

JF - Neuroscience & Biobehavioral Reviews

JA - Neurosci Biobehav.Rev

VL - 35

IS - 9

CY - United States

N2 - The evidence that frequency modulated (FM) 50 kHz ultrasonic vocalizations (USVs) reflect a positive emotional state in rats is reviewed. Positive emotional states in humans are measured by facial-vocal displays (e.g., Duchenne smiling and laughter), approach behavior, and subjective self-report of feeling states. In laboratory animals, only facial-vocal displays, along with approach behavior can be measured. FM 50 kHz USVs are uniquely elevated by hedonic stimuli and suppressed by aversive stimuli. Rates of FM 50 kHz USVs are positively correlated to the rewarding value of the eliciting stimulus. Additionally, playbacks of these vocalizations are rewarding. The neural and pharmacological substrates of 50 kHz USVs are consistent with those of human positive affective states. By experimentally eliciting FM 50 kHz USVs, the novel molecular underpinning of positive affect can be elucidated and may be similar to those in humans. In humans, positive emotional states confer resilience to depression and anxiety, as well as promote overall health. Using rough-and-tumble play induced hedonic USVs, we have identified insulin like growth factor I and the NR2B subunit of the NMDA receptor as playing a functional role in positive affective states. From this research, we have developed a promising new class of antidepressants that is entering phase II clinical trials for the treatment of depression. Copyright 2010 Elsevier Ltd. All rights reserved

Copyright 2010 Elsevier Ltd. All rights reserved

SN - 1873-7528

AD - The Falk Center for Molecular Therapeutics, Department of Biomedical Engineering, The McCormick School of Engineering and Applied Sciences, Northwestern University, Evanston, IL 60201, USA. j-burgdorf@northwestern.edu

UR - 21144859

ER -

TY - JOUR

ID - 1015

T1 - Thinking Creatively Is Thinking Critically

A1 - Gruenfeld,Elizabeth

Y1 - 2010///

N1 - Last updated - 2012-12-14

SubjectsTermNotLitGenreText - 7940 126; 2432 1710; 2388 8409 5051; 2226 7921; 4109 4335; 1114 8193 8477; 309 8331; 3363 10278 8016 4542; 695 694 8016 4542; 4979 2388 8409 5051; 6120 4918 5964; 622 126

KW - Peru

KW - Argentina

KW - Massachusetts

KW - ERIC,Current Index to Journals in Education (CIJE)

KW - Elementary Education

KW - Grade 2

KW - Grade 3

KW - Elementary School Students

KW - Play

KW - Literature

KW - After School Programs

KW - Critical Thinking

KW - Creativity

KW - Imagination

KW - At Risk Students

KW - Foreign Countries

KW - Books

KW - Cooperative Planning

KW - Art Activities

KW - ERIC

RP - NOT IN FILE

SP - 71

EP - 83

JF - New Directions for Youth Development

JA - New Dir.Youth Dev.

IS - 125

PB - Jossey-Bass. , 111 River Street, Hoboken, NJ 07030-5774.

N2 - The Cartoneras projects aim to promote the celebration of language, culture, and creativity through a collaboration between top literary minds and cardboard collectors in Buenos Aires and Lima. They produce and publish beautiful books with hand-painted cardboard covers that speak of the wonderful literature inside.

Inspired by those projects, the Paper Picker Press (PPP) program in Boston aims to engage higher-order thinking through an arts-based approach to rediscovering literature through play. PPP starts with the premise that a student who is thinking creatively is also thinking critically. Creative play is critical thinking. (Contains 20 notes.)

SN - 1533-8916, 1533-8916

UR - <http://search.proquest.com/docview/742856405?accountid=14701>

ER -

TY - JOUR

ID - 1016

T1 - Parental Perceptions of Neighborhood Processes, Stress, Personal Control, and Risk for Physical Child Abuse and Neglect

A1 - Guterman,Neil B.

A1 - Lee,Shawna J.

A1 - Taylor,Catherine A.

A1 - Rathouz,Paul J.

Y1 - 2009/12//

N1 - Last updated - 2012-12-14

SubjectsTermNotLitGenreText - 7040 1873 4542; 7940 126; 1454 545 9738 909 7006; 1429 545 9738 909; 6823 3932 8016 4542 7577 3816; 10162 1352 6752 9651 6582; 3602 8016 4542; 1459; 9761 3518; 7531 730; 8996; 8094; 5472 3629 6582; 1326 3629 6582 8836; 10152; 7537 3851 5449 8768

KW - ERIC,Current Index to Journals in Education (CIJE)

KW - Prediction

KW - Play

KW - Case Studies

KW - Structural Equation Models

KW - Mothers

KW - Neighborhoods

KW - Stress Variables

KW - Risk

KW - Ethnic Groups

KW - Parent Child Relationship

KW - Child Rearing

KW - Child Neglect

KW - Parent Attitudes

KW - Interviews

KW - Child Abuse

KW - Social Environment

KW - ERIC

RP - NOT IN FILE

SP - 897

EP - 906

JF - Child Abuse & Neglect: The International Journal

VL - 33

IS - 12

PB - Elsevier. 6277 Sea Harbor Drive, Orlando, FL 32887-4800.

N2 - Objective: This study set out to examine whether mothers' individual perceptions of their neighborhood social processes predict their risk for physical child abuse and neglect directly and/or indirectly via pathways involving parents' reported stress and sense of personal control in the parenting role. Methods: In-home and phone interview data were examined cross-sectionally from a national birth cohort sample of 3,356 mothers across 20 US cities when the index child was 3 years of age. Mothers' perceptions of neighborhood social processes, parenting stress, and personal control were examined as predictors, and three subscales of the Parent-To-Child Conflict Tactics Scale (CTS-PC) were employed as proxies of physical child abuse and neglect risk. Structural equation modeling (SEM) was employed to test direct and indirect pathways (via parenting stress and control) from perceived neighborhood processes to proxy measures of physical child abuse and neglect. Multiple group SEM was conducted to test for differences across major ethnic groups: African American, Hispanic, and White. Results: Although perceived negative neighborhood processes had only a mild direct role in predicting risk for physical child abuse, and no direct role on child neglect, these perceptions had a discernable indirect role in predicting risk via parenting stress and personal control pathways. Parenting stress exerted the clearest direct role on both physical abuse and neglect risk. This predictor model did not significantly differ across ethnic groups. Conclusions: Although neighborhood conditions may not play a clear directly observable role on physical child abuse and neglect risk, the indirect role they play underscores the importance of parents' perceptions of their neighborhoods, and especially the role they play via parents' reported stress and personal control. Practice implications: Such findings suggest that targeting parents' sense of control and stress in relation to their immediate social environment holds particular potential to reduce physical child abuse and neglect risk. Addressing parents' perceptions of their neighborhood challenges may serve to reduce parenting risk via improving parents' felt control and stress. (Contains 3 tables and 2 figures.)

SN - 0145-2134, 0145-2134

UR - <http://search.proquest.com/docview/61821834?accountid=14701>

ER -

TY - BOOK

ID - 1017

T1 - Partnering Dance and Education. Intelligent Moves for Changing Times

A1 - Hanna, Judith Lynne

Y1 - 1999/01//

N1 - Availability - Level 3 - Indexed only

Last updated - 2012-12-14

KW - ERIC, Resources in Education (RIE)

KW - Practitioners

KW - Students

KW - Teachers

KW - Elementary Secondary Education

KW - Higher Education

KW - High Risk Students

KW - Play

KW - Dance Education

KW - Stress Management

KW - Diversity (Student)

KW - CHILDREN

KW - Movement Education

KW - Sex Differences

KW - Cultural Differences

KW - Interdisciplinary Approach

KW - ERIC

RP - NOT IN FILE

SP - 256

PB - Human Kinetics, 1607 North Market Street, P.O. Box 5076, Champaign, IL 61825-5076; Tel: 217-351-5076; Tel: 800-747-4457 (Toll Free); Fax: 217-351-1549; E-mail: [humank@hkusa.com](mailto:humank@hkusa.com); Web site: <http://www.humankinetics.com> (\$30).

N2 - This book offers information and insights for university dance educators and their students, administrators, policy makers, parents, dance instructors, dancers, and dance enthusiasts. Part 1, "Understanding Dance Education," explains key features of the discipline of dance and how it is a performing, liberal, physical, and applied art. Its four chapters include (1) "Is Dance a Distinct Body of Knowledge?" (2) "The Power of Dance Well Taught," (3) "Survival of Dance Education," and (4) "Who Should Teach Dance?" Part 2, "Learning In, About, and Through Dance," describes how to teach social, academic, and career skills through dance. Its chapters include (5) "Teaching Academic, Citizenship, and Workplace Skills Through Dance," (6) "Dance Education for At-Risk Youth," (7) "Children's Dance at Play as a Teaching Tool," (8) "National Identity and Cultural Diversity in Dance Education," (9) "Dance Education and Gender," and (10) "Dance Education and Stress." A finale, "Overcoming Obstacles and Moving Forward," discusses hurdles to dance education's success and notes promising pathways to overcome these obstacles. The three appendixes include discussion questions, an outline of National Dance Education Standards, and dance education resources. (SM)

SN - 0880115114

UR - <http://search.proquest.com/docview/62482446?accountid=14701>

ER -

TY - JOUR

ID - 1018

T1 - Hazards faced by young designated drivers: in-car risks of driving drunken passengers

A1 - Rothe, P.J.

A1 - Carroll, L.J.

Y1 - 2009/06//

N1 - Rothe, Peter J. Carroll, Linda J

International journal of environmental research and public health

101238455

IM

Journal Article

English

KW - Medline

KW - Rough and Tumble

KW - Adolescent

KW - Adult

KW - Alberta

KW - Alcoholic Intoxication

KW - Automobile Driving

KW - Focus Groups

KW - Humans

KW - Risk Factors

KW - Young Adult

RP - NOT IN FILE

SP - 1760

EP - 1777

JF - International Journal of Environmental Research & Public Health [Electronic Resource]

JA - Int.J Environ.Res.Public Health

VL - 6

IS - 6

CY - Switzerland

N2 - This qualitative study explored the risk in the practice of young designated drivers transporting drunken peers. Young drivers 18-29 years old in Alberta, Canada participated in 12 focus groups (N = 146). Interviews were semi-structured. A key finding is that when highly intoxicated youth are driven by a designated driver who is a peer, they are likely to behave in ways that are unsafe. Unsafe actions of drunken passengers in the vehicle include physical "rough-housing" with the driver, creating stress for the driver that leads to high risk driving situations and disrupting safe driving through nausea and in-car vomiting

SN - 1660-4601

AD - Centre for Health Promotion Studies and Alberta Centre for Injury Control and Research, School of Public Health, University of Alberta, 4075 RTF, 8308-114 Street, Edmonton, Alberta T6G2E1, Canada.

peter.rothe@ualberta.ca

UR - 19578459

ER -

TY - JOUR

ID - 1020

T1 - Autism Symptoms in Toddlers with Down Syndrome: A Descriptive Study

A1 - Hepburn,Susan

A1 - Philofsky,Amy

A1 - Fidler,Deborah J.

A1 - Rogers,Sally

Y1 - 2008/01//

N1 - Last updated - 2012-12-14

SubjectsTermNotLitGenreText - 811 7786 6531 2877; 2995 2118 2877 6540; 10883 11655 1474 316 8016

4542; 10411; 694 8016 4542; 7786 6531 2877; 2814 10789 6447; 1651 4954; 5445 1849; 7940 126; 5449 8768; 5446 1970 1

KW - ERIC,Current Index to Journals in Education (CIJE)

KW - At Risk Persons

KW - Toddlers

KW - Play

KW - Clinical Diagnosis

KW - Pervasive Developmental Disorders

KW - Symptoms (Individual Disorders)

KW - Interpersonal Competence

KW - Diagnostic Tests

KW - Interpersonal Communication

KW - Down Syndrome

KW - Interpersonal Relationship

KW - Autism

KW - ERIC

RP - NOT IN FILE

SP - 48

EP - 57

JF - Journal of Applied Research in Intellectual Disabilities

VL - 21

IS - 1

PB - Blackwell Publishing. 350 Main Street, Malden, MA 02148.

N2 - Background: Research suggests that children with Down syndrome may be at increased risk of having an autism spectrum disorder; however, previous studies have not utilized comprehensive, state-of-the-art diagnostic tools to address the question of comorbid autism and Down syndrome. Method: Comprehensive evaluations for autism were conducted in 20 2-year-old children with Down syndrome. The Autism Diagnostic Observation Schedule-Generic (ADOS-G) and the Autism Diagnostic Interview-Revised (ADI-R) were administered by experienced clinicians, who then determined if the child presented with significant symptoms of autism. Eighteen children participated in a follow-up evaluation at age 4 years. Results: Three children (15%) met criteria for an autism spectrum disorder at both time points, and two (10%) for autistic disorder. Case descriptions are provided. Several children presented with difficulties in communication and play, but did not show problems in core social relatedness. The ADOS-G, if used alone, over-identifies autism in toddlers with Down syndrome. Conclusions: Clinical judgement is critical in diagnosing autism in Down syndrome. Young children may show some signs of autism (particularly in the area of communication) and not have the disorder. Children who have comorbid Down syndrome and autism are particularly challenged, relative to their peers without autism

SN - 1360-2322, 1360-2322

UR - <http://search.proquest.com/docview/61873655?accountid=14701>

ER -

TY - JOUR

ID - 1021

T1 - Prenatal programming of sporting success: associations of digit ratio (2D:4D), a putative marker for prenatal androgen action, with world rankings in female fencers

A1 - Bescos,R.

A1 - Esteve,M.

A1 - Porta,J.

A1 - Mateu,M.

A1 - Irurtia,A.

A1 - Voracek,M.

Y1 - 2009/04//

N1 - Bescos, Raul. Esteve, Marc. Porta, Jordi. Mateu, Merce. Irurtia, Alfredo. Voracek, Martin

Journal of sports sciences

8405364, kbt

IM

Journal Article

English

KW - Medline

KW - Rough and Tumble

KW - Adolescent

KW - Adult

KW - Athletic Performance/ph [Physiology]

KW - Female

KW - Fetal Development

KW - Fingers/ah [Anatomy & Histology]

KW - Humans

KW - Organ Size

KW - Sex Characteristics

KW - Somatotypes

KW - Track and Field

KW - Young Adult

RP - NOT IN FILE

SP - 625

EP - 632

JF - Journal of Sports Sciences

JA - J Sports Sci

VL - 27

IS - 6

CY - England

N2 - Associations of the second-to-fourth digit ratio (2D:4D), a putative marker for prenatal androgen action, and of absolute finger length, a putative marker for pubertal-adolescent androgen action, with sport performance were examined in a multinational sample of 87 world-class women epee fencers. Lower (masculinized) digit ratios correlated, although not significantly so, with better current and highest past world rankings. These correlations were significant for right-hand 2D:4D with controls for the most salient factors for 2D:4D (ethnicity) and world rankings (years of international experience, height, and weight). Longer (masculinized) fingers correlated strongly with better current and highest past world rankings; these correlations became insignificant with the same controls. Replicating previous evidence for fencers, left-handedness was much more prevalent in this sample (21%) than in the female general population, and left-handers had somewhat, but not significantly so, lower 2D:4D as well as better world rankings than right-handers. These findings extend related evidence suggestive of prenatal programming of aptitude across a variety of sports, especially running and soccer. Some known extragenital effects of prenatal testosterone that contribute to the development of efficient cardiovascular systems, good visuospatial abilities, physical endurance and speed, and to the propensity for rough-and-tumble play, apparently promote sporting success in adult life

SN - 0264-0414

AD - Laboratory of Physiology, National Institute of Sports Sciences of Barcelona, Barcelona, Spain.

raul.bescos@inefc.net

UR - 19308788

ER -

TY - JOUR

ID - 1022

T1 - Adult Attitudes and Beliefs regarding Play on Lana'i

A1 - Holmes,Robyn M.

Y1 - 2011///

N1 - Last updated - 2013-02-26

SubjectsTermNotLitGenreText - 7940 126; 1309 8016 4542; 1303 730; 1306 9015; 1440 1309 8016 4542; 1304 5449 8768; 1940 10380 3629 6582; 9748 1710; 8996; 4625 7491 7160 8016 4542 7492 5046 3602; 932 730; 2494; 9817 11212; 5472 3629 6582; 9020 1710; 2802 3242

KW - ERIC,Current Index to Journals in Education (CIJE)

KW - Elementary Secondary Education

KW - Caregiver Child Relationship

KW - Play

KW - Role Perception

KW - Hawaiians

KW - Child Caregivers

KW - Social Values

KW - Caregiver Attitudes

KW - Risk

KW - Caregivers

KW - Community Surveys

KW - Caregiver Role

KW - Developmentally Appropriate Practices

KW - Cultural Relevance

KW - Interviews

KW - Beliefs

KW - Social Cognition



KW - ERIC

RP - NOT IN FILE

SP - 356

EP - 384

JF - American Journal of Play

VL - 3

IS - 3

PB - The Strong. One Manhattan Square, Rochester, NY 14607.

N2 - This article describes how adult attitudes toward play on the Hawaiian island of Lana'i reflect the connection between play and culture. It is based on a study of ninety-two caregivers (parents, grandparents, and other adult custodians), primarily representing individuals of Filipino, part Hawaiian, and Japanese heritages. These respondents completed a survey about the value of play for their children, the types of play they encouraged or discouraged, and the extent and nature of their own involvement in their children's play. The caregivers acknowledged the importance of play for their children and its developmental benefits, particularly those connected to culture. In keeping with the more collectivist ideology of Pacific Rim cultures, the caregivers encouraged types of play that fostered social skills such as cooperation, sharing, and group play. They strongly discouraged types of play that might harm or injure children. And they acknowledged the need for caretakers to set aside time to participate in their children's play. (Contains 6 tables.)

SN - 1938-0399, 1938-0399

UR - <http://search.proquest.com/docview/1312421327?accountid=14701>

ER -

TY - JOUR

ID - 1023

T1 - The Outdoor Recess Activities of Children at an Urban School: Longitudinal and Intraproduct Patterns

A1 - Holmes, Robyn M.

Y1 - 2012///

N1 - Last updated - 2013-02-26

SubjectsTermNotLitGenreText - 7940 126; 11182 9306 5241; 7223 1096 7843 5051 2923 2877 1088; 7594 8216 9306 5241; 8684; 312 5054 2842; 4290; 4516 5348 8768; 290 293 7160 8016 4542 10278; 4758 10278 8016 4542 4759 7160; 6188 8016 4542; 7676 5449 8768; 5445 1849; 7840 126; 1974 909; 4270 126; 704 7840 126; 10576 5449 8768; 695 694 8016 4542; 2484 5127; 6175 1326 3629 6582 8836

KW - United States (Northeast)

KW - ERIC, Current Index to Journals in Education (CIJE)

KW - Elementary Education

KW - Elementary Secondary Education

KW - Grade 1

KW - Grade 2

KW - Grade 3

KW - Grade 4

KW - Grade 5

KW - Grade 6

KW - Grade 7

KW - Grade 8

KW - Athletics

KW - Low Income Groups

KW - Obesity

KW - Teacher Student Relationship

KW - Play

KW - Parochial Schools

KW - Gender Differences

KW - Recess Breaks

KW - Urban Schools

KW - Group Dynamics

KW - Longitudinal Studies

KW - Peer Relationship

KW - At Risk Students  
KW - Physical Activities  
KW - Cultural Influences  
KW - Interpersonal Communication  
KW - African American Students  
KW - Hispanic American Students  
KW - Games  
KW - Competition  
KW - Age Differences  
KW - ERIC  
RP - NOT IN FILE  
SP - 327  
EP - 351  
JF - American Journal of Play  
VL - 4  
IS - 3  
PB - The Strong. One Manhattan Square, Rochester, NY 14607.  
N2 - Based on a study of 149 parochial-school students enrolled in kindergarten through eighth grade, this article explores children's outdoor recess activities in an urban setting--with a focus on how age, gender, and size of play group influence their outdoor play preferences--and examines changes in children's activity preferences over a single recess period. The majority of the children in the study have African American and Hispanic ethnic heritages and lower-socioeconomic backgrounds. Both boys and girls spent most of recess socializing with their peers, though their play varied by gender and age. Most girls spent the majority of their recess talking and socializing. Older boys engaged in physical, competitive activities such as sports and in larger boy groups. Younger children spent more time chasing each other in boy-girl groupings and in informal activities. Girls interacted with their teachers more than boys. The author argues that these and other findings from the study have applied value, expanding our understanding of how cultural and historical factors have shaped the play of American children and indicating that urban school children of African American and Hispanic heritages are at a greater risk for obesity. Such findings would be useful in shaping school policy regarding the duration of recess breaks, the types of activities that should be encouraged, and the impact the policy might have on children's overall health. (Contains 1 table and 11 figures.)  
SN - 1938-0399, 1938-0399  
UR - <http://search.proquest.com/docview/1312420599?accountid=14701>  
ER -  
  
TY - JOUR  
ID - 1024  
T1 - How Safe Are School and Park Playgrounds?  
A1 - Hudson,Susan D.  
A1 - Thompson,Donna  
A1 - Olsen,Heather  
Y1 - 2005/01/01/  
N1 - Last updated - 2012-12-14  
SubjectsTermNotLitGenreText - 1463 9074; 83 8168; 7943 8704 3760; 9273 9074; 7940 126; 5183 2877; 8704 3760; 8998 153 4398; 3557 6251; 7591 3760  
KW - United States  
KW - ERIC,Current Index to Journals in Education (CIJE)  
KW - Elementary Education  
KW - Recreational Facilities  
KW - Play  
KW - Injuries  
KW - Playgrounds  
KW - Equipment Maintenance  
KW - Parks  
KW - Risk Management  
KW - School Safety

KW - Accident Prevention

KW - Child Safety

KW - ERIC

RP - NOT IN FILE

SP - 16

JF - Journal of Physical Education, Recreation & Dance (JOPERD)

VL - 76

IS - 1

PB - Journal of Physical Education, Recreation & Dance, American Alliance for Health, Physical Education, Recreation and Dance (AAHPERD), 1900 Association Drive, Reston, VA 20191. Tel: 800-213-7193, ext. 493 (Toll Free).

N2 - Playgrounds traditionally have been found in both schools and parks in America. Each year, parent-teacher associations and school administrations, as well as park and recreation departments, spend millions of dollars to provide playground structures. However, since 1981, HPER professionals and the public have become increasingly aware that these structures can also lead to injuries in children and pose a liability to the owner and operator of the play equipment. More than 200,000 children are injured annually in playground-related incidents that are serious enough for them to seek medical attention (Tinsworth & McDonald, 2001). Within the elementary school setting, 80 percent of injuries that occur at school happen on the playground (Bruya, 1998). One solution to this problem is to remove all play structures. After all, the reasoning goes, if no playground equipment is present, then the liability problem does not exist. However, this approach to the problem eliminates the physical, emotional, social, and intellectual development of children that can be gained from their interactions on play equipment. This zero approach also serves to devalue the play of children. This article reports on how SAFE America's school and park playgrounds are today, as found in the latest study. Specific topics that will be examined include a summary of the conditions of school and park playgrounds, a discussion of the four SAFE elements, and recommendations for change

SN - 0730-3084, 0730-3084

UR - <http://search.proquest.com/docview/62138063?accountid=14701>

ER -

TY - JOUR

ID - 1025

T1 - The Effects of a Buddy Skills Package on Preschool Children's Social Interactions and Play

A1 - Hughett, Kristy

A1 - Kohler, Frank W.

A1 - Raschke, Donna

Y1 - 2013/02//

N1 - Last updated - 2013-04-02

SubjectsTermNotLitGenreText - 2790; 3924 5348 8768; 7940 126; 8127 11655 1474 316 8016 4542; 3005 9021 9651 6582; 7676 5449 8768; 9685 5053 2787; 9753 5053 2787; 5449 8768; 7896 11317 10120; 8034 8762; 2221 909; 695 694 8016 4542

KW - ERIC, Current Index to Journals in Education (CIJE)

KW - Preschool Education

KW - Play

KW - Dramatic Play

KW - Cooperation

KW - Developmental Delays

KW - Skill Development

KW - Feedback (Response)

KW - Peer Relationship

KW - Positive Reinforcement

KW - At Risk Students

KW - Social Development

KW - Pictorial Stimuli

KW - Interpersonal Relationship

KW - Preschool Children

KW - ERIC

RP - NOT IN FILE

SP - 246

EP - 254

JF - Topics in Early Childhood Special Education

VL - 32

IS - 4

PB - SAGE Publications and Hammill Institute on Disabilities. 2455 Teller Road, Thousand Oaks, CA 91320.

N2 - The purpose of this study was to examine the impact of a buddy skills package on the social and play interactions between three preschoolers with developmental delays and their peers. Each child participated in sociodramatic play activities with two peers who exhibited age-appropriate social and play skills. Following baseline, the children participated in three sessions of training on the strategies of stay, play, and talk with your friends. The intervention consisting of teacher feedback, praise, and picture cards was then used to support children's social interactions and play. A multiple baseline design indicated that the package was effective for increasing children's cooperative play in the exchange of activity-related comments. In addition, each playgroup continued to demonstrate these positive outcomes during a maintenance condition. (Contains 2 tables and 1 figure.)

SN - 0271-1214, 0271-1214

UR - <http://search.proquest.com/docview/1322246684?accountid=14701>

ER -

TY - JOUR

ID - 1026

T1 - Playgroups as Protective Environments for Refugee Children at Risk of Trauma

A1 - Jackson,Dianne

Y1 - 2006/06//

N1 - Last updated - 2012-12-14

SubjectsTermNotLitGenreText - 7940 126; 9813 4542; 4109 4335; 9783 7051; 8733 6671 8016 4542; 4985 6671 8016 4542; 694 8016 4542; 2240 150 909; 11405 2112; 150 909; 10151; 7763 8409 5051; 9538 547 8415; 7537 3851 5449 8768; 11655 1474 316 8016 4542

KW - Australia

KW - ERIC,Current Index to Journals in Education (CIJE)

KW - At Risk Persons

KW - Play

KW - Young Children

KW - Immigrants

KW - Social Support Groups

KW - Separation Anxiety

KW - Stress Management

KW - Refugees

KW - Personality Traits

KW - Foreign Countries

KW - Adjustment (to Environment)

KW - War

KW - Parent Child Relationship

KW - Social Networks

KW - Coping

KW - ERIC

RP - NOT IN FILE

SP - 1

EP - 5

JF - Australian Journal of Early Childhood

VL - 31

IS - 2

PB - Early Childhood Australia. P.O. Box 7105, Watson, ACT 2602, Australia. Tel: +61-2-6242-1800; Fax: +61-2-6242-1818; e-mail: [publishing@earlychildhood.org.au](mailto:publishing@earlychildhood.org.au); Web site:

<http://www.earlychildhoodaustralia.org.au>

N2 - Refugee families in Australia generally have a dual challenge--dealing with past traumatic experiences while facing the struggles of integrating with a new and unfamiliar society. For children and their families who have experienced war-related trauma and disruption, the resettlement process is being referred to as "secondary trauma" to highlight the problems refugees face under these circumstances (Fazel & Stein, 2002). This paper discusses the possible long-term effects of trauma and reports on a small study that investigated whether or not a supported playgroup used by refugee families in western Sydney could be considered a protective environment. Emerging evidence showed that, while families reported difficulties associated with resettlement, they experienced ongoing emotional support within the playgroup and developed new social networks which resulted in reduced levels of stress and anxiety. Children showed improvements in the home and playgroup environments which highlighted the significant role the group played in facilitating resilience. (Contains 1 table.)

SN - 0312-5033, 0312-5033

UR - <http://search.proquest.com/docview/61924733?accountid=14701>

ER -

TY - GEN

ID - 1027

T1 - Coordinating the Elusive Playground Triad: Managing Children's Risk-Taking Behavior, (While) Facilitating Optimal Challenge Opportunities, (within) a Safe Environment

A1 - Jambor, Tom

Y1 - 1995/10/10/

N1 - Availability - Level 1 - Available online, if indexed January 1993 onward

SuppNotes - Paper presented at the International Conference on Playground Safety (University Park, PA, October 10, 1995)

Last updated - 2012-12-14

KW - Playground Design

KW - Playground Equipment

KW - Risk Taking

KW - ERIC,Resources in Education (RIE)

KW - Risk

KW - Recreational Facilities

KW - Play

KW - Injuries

KW - Playgrounds

KW - Safety

KW - Childhood Needs

KW - School Safety

KW - CHILDREN

KW - Child Safety

KW - ERIC

RP - NOT IN FILE

SP - 9

N2 - While it is our responsibility as adults to protect our children from hazards that would inflict injury, it is also our responsibility to provide children with a safe play environment providing challenging opportunities to explore, practice, and reach personal levels of competence. Children learn their own play abilities and limitations through the trial and error of daily play encounters. Once personal competence and a sense of security are gained, children attempt higher levels of play involvement. Inventing new ways to play on boring equipment can lead to risk-taking that increases the chance of injury. Adults should be aware of children's understanding of play challenge. Toddlers have little understanding of potentially dangerous situations and must be closely monitored. Preschoolers should be given opportunities for play that lead to enhanced competence. By age 7, children are unlikely to exceed their ability and take unnecessary risk unless pressured by children or adults. However, some children are inherently more likely than others to be risk-takers at an early age. A constructive approach to risk-taking is to differentiate between developmental challenge and unnecessary risk or hazard. Most playground injuries are caused by hazards rather than poor judgment in risk-taking. The initial step in playground design or maintenance is to identify potential hazards. Completely safe playgrounds may be acceptable to adults but children are likely to reject them and seek challenge and risk in potentially dangerous

environments. The quality of children's play within adult contrived play spaces is questionable. We must balance safety regulations and the challenge and risk-taking needs of children. (KDFB)

UR - <http://search.proquest.com/docview/62560954?accountid=14701>

ER -

TY - GEN

ID - 1028

T1 - Developing Social Skills among Campers. Research Notes

A1 - Jordan,Debra J.

Y1 - 1994///

N1 - SuppNotes - Theme issue: "The Wealth of Diversity."

Last updated - 2012-12-14

KW - ERIC,Current Index to Journals in Education (CIJE)

KW - At Risk Persons

KW - Elementary School Students

KW - Child Behavior

KW - Camping

KW - Mainstreaming

KW - Intervention

KW - CHILDREN

KW - Peer Relationship

KW - Interpersonal Competence

KW - Disabilities

KW - Child Development

KW - Research

KW - Pretend Play

KW - Attitudes toward Disabilities

KW - ERIC

RP - NOT IN FILE

SP - 47

JF - Camping Magazine

VL - 67

IS - 1

N2 - Reviews research on the attitudes of nondisabled children toward disabled children in regular classroom settings, and on patterns of play among at-risk and non-at-risk children. Implications for camps include encouraging social skills development through an atmosphere of peer friendship development, and helping at-risk children develop verbal skills and appropriate social behaviors through play. (LP)

UR - <http://search.proquest.com/docview/62732630?accountid=14701>

ER -

TY - BOOK

ID - 1029

T1 - Vocabulary Instruction: Research to Practice. Second Edition

A1 - Kame'enui,Edward J.

A1 - Baumann,James F.

Y1 - 2012/04//

N1 - Last updated - 2012-12-14

KW - ERIC,Resources in Education (RIE)

KW - Teachers

KW - Early Childhood Education

KW - Elementary Education

KW - Elementary Secondary Education

KW - Preschool Education

KW - Intermediate Grades

KW - Vocabulary

KW - Student Diversity

KW - Reading Research  
KW - At Risk Students  
KW - Spelling  
KW - Reading Instruction  
KW - Educational Games  
KW - Teaching Guides  
KW - Literacy  
KW - Preschool Children  
KW - Multimedia Materials  
KW - Learning Strategies  
KW - Vocabulary Development  
KW - Elementary School Students  
KW - Class Activities  
KW - Play  
KW - Incidental Learning  
KW - Second Language Learning  
KW - Story Reading  
KW - Spelling Instruction  
KW - English Language Learners  
KW - Grade 4  
KW - Direct Instruction  
KW - Student Evaluation  
KW - Educational Assessment  
KW - Reading Difficulties  
KW - Morphemes  
KW - ERIC  
RP - NOT IN FILE

SP - 322

PB - Guilford Press. 72 Spring Street, New York, NY 10012.

N2 - This highly regarded work brings together prominent authorities on vocabulary teaching and learning to provide a comprehensive yet concise guide to effective instruction. The book showcases practical ways to teach specific vocabulary words and word-learning strategies and create engaging, word-rich classrooms. Instructional activities and games for diverse learners are brought to life with detailed examples. Drawing on the most rigorous research available, the editors and contributors distill what PreK-8 teachers need to know and do to support all students' ongoing vocabulary growth and enjoyment of reading. This second edition: (1) reflects the latest research and instructional practices; (2) contains a new section (five chapters) on pressing current issues in the field: assessment, authentic reading experiences, English language learners, uses of multimedia tools, and the vocabularies of narrative and informational texts; and (3) includes an expanded contributor panel with additional leading researchers. Contents of this book include: (1) Context for Vocabulary Instruction (Edward J. Kame'enui and James F. Baumann); (2) Direct and Rich Vocabulary Instruction Needs to Start Early (Margaret G. McKeown, Isabel L. Beck, and Cheryl Sandora); (3) Teaching Vocabulary in the Primary Grades: Vocabulary Instruction Needed (Andrew Biemiller); (4) Vocabulary Instruction for Young Children at Risk of Reading Difficulties: Teaching Word Meanings during Shared Storybook Readings (Michael D. Coyne, Ashley Capozzoli-Oldham, and Deborah C. Simmons); (5) Young Word Wizards!: Fostering Vocabulary Development in Preschool and Primary Education (Katherine A. Dougherty Stahl and Steven A. Stahl); (6) Teaching Prefixes: Making Strong Instruction Even Stronger (Michael F. Graves, Melanie Ruda, Gregory C. Sales, and James F. Baumann); (7) The Vocabulary-Spelling Connection and Generative Instruction: Morphological Knowledge at the Intermediate Grades and Beyond (Shane Templeton); (8) Teaching Word-Learning Strategies (James F. Baumann, Elizabeth Carr Edwards, Eileen Boland, and George Font); (9) Developing Word Consciousness: Lessons from Highly Diverse Fourth-Grade Classrooms (Judith A. Scott, Tatiana F. Miller, and Susan Leigh Flinspach); (10) Keep the "Fun" in Fundamental: Encouraging Word Consciousness and Incidental Word Learning in the Classroom through Word Play (Camille L. Z. Blachowicz and Peter Fisher); (11) Language Play: Essential for Literacy (Dale D. Johnson, Bonnie Johnson, and Kathleen Schlichting); (12) Vocabulary Assessment: Making Do with What We Have While We Create the Tools We Need (P. David Pearson, Elfrieda H. Hiebert, and Michael L. Kamil); (13) Reading and Vocabulary Growth (Anne E. Cunningham and Colleen Ryan O'Donnell); (14) Powerful Vocabulary Instruction for English Learners (Patrick C. Manyak); (15) Using

Multimedia to Support Generative Vocabulary Learning (Jill Castek, Bridget Dalton, and Dana L. Grisham); and (16) What Differences in Narrative and Informational Texts Mean for the Learning and Instruction of Vocabulary (Elfrieda H. Hiebert and Gina N. Cervetti)

SN - 9781462503988

UR - <http://search.proquest.com/docview/1018479225?accountid=14701>

ER -

TY - JOUR

ID - 1030

T1 - Changing What You Know and Do: The Parent-Child Psychotherapy Program

A1 - Kaplan,Betty Ann

A1 - Venza,James

Y1 - 2011/03//

N1 - Last updated - 2012-12-14

SubjectsTermNotLitGenreText - 7940 126; 714 909; 7577 3816 8016 4542; 8433 10839; 4537 10839; 3825 2291 4552; 694 8016 4542; 11655 1474 316 8016 4542; 1429 545 9738 909; 1454 545 9738 909 7006; 3830 3518; 2798; 2302 6582

KW - ERIC,Current Index to Journals in Education (CIJE)

KW - At Risk Persons

KW - Family Environment

KW - Play

KW - Young Children

KW - Group Therapy

KW - Family Counseling

KW - Counseling Techniques

KW - Psychotherapy

KW - Developmental Stages

KW - Child Neglect

KW - Child Abuse

KW - Parents

KW - Attachment Behavior

KW - ERIC

RP - NOT IN FILE

SP - 45

EP - 51

JA - Zero to Three

VL - 31

IS - 4

PB - Zero to Three. 2000 M Street NW Suite 200, Washington, DC 20036-3307.

N2 - The Parent-Child Psychotherapy Program (PPP) is a multifamily group therapy intervention for parents and young children at high risk for intergenerational patterns of neglect, abuse, and disorganized attachment. A "developmental and experiential model" that incorporates principles of attachment theory, the PPP addresses parent and child needs simultaneously in the context of structured activities, free play, and separate parent- and child-only groups. Therapeutic objectives aim to shift parents' internal working models of relationship toward increasing attachment security, to change parent-child behaviors to promote safety and exploration, to build a foundation for parent-therapist collaboration, and to propel children's healthy development in a safe, predictable, and emotionally attuned environment. The authors present the history of the PPP, its underlying assumptions, and specific interventions with a family

SN - 0736-8038, 0736-8038

UR - <http://search.proquest.com/docview/881469509?accountid=14701>

ER -

TY - GEN

ID - 1031

T1 - Family Living: Suggestions for Effective Parenting

A1 - Katz,Lilian G.



Y1 - 1989///

N1 - Availability - Level 1 - Available online, if indexed January 1993 onward

Last updated - 2012-12-14

KW - Infant Day Care

KW - Praise

KW - ERIC,Resources in Education (RIE)

KW - Parents

KW - Early Childhood Education

KW - Kindergarten

KW - Parent Education

KW - Parenting Skills

KW - Employer Supported Day Care

KW - High Risk Students

KW - Play

KW - Language Acquisition

KW - Young Children

KW - Individual Characteristics

KW - Academic Achievement

KW - Family Life

KW - Childhood Needs

KW - Creativity

KW - Elementary School Curriculum

KW - Emotional Experience

KW - Oral Language

KW - Behavior

KW - Parent Participation

KW - Annotated Bibliographies

KW - ERIC

RP - NOT IN FILE

SP - 121

PB - ERIC Clearinghouse on Elementary and Early Childhood Education, University of Illinois, 805 West Pennsylvania Avenue, Urbana, IL 61801 (Catalog No. 205, \$11.75).

N2 - Suggestions for effective parenting of preschool children are provided in 33 brief articles on children's feelings concerning self-esteem; fear; adopted children; the birth of a sibling; death; depression; and coping with stress, trauma, and divorce. Children's behavior is discussed in articles on toddlers' eating habits, punishment and preschoolers, whining, making friends, bedtime, good manners, interpersonal conflict, and friendship.

Articles on children's learning focus on preparation for preschool, what preschoolers should be learning, first days of preschool, exercising choice, and questions about sex. Parenting is discussed in articles on assessing preschoolers' development, nudity at home, traveling with a preschooler, monitoring television viewing, parental disagreements about child rearing, the only child, chores, sex differences, stress, and children's wish to sleep in their parents' bed. Also included are ERIC digests on involving parents in the education of their children, the escalating kindergarten curriculum, praise in the classroom, the nature of children's play, creativity in young children, infant day care, and language development. Resource lists cite ERIC documents and journal articles on employer-supported child care, at-risk children, and school success. A reprint of a computer search of the ERIC database on family living is included. (RH)

UR - <http://search.proquest.com/docview/63030191?accountid=14701>

ER -

TY - JOUR

ID - 1032

T1 - Links between play and dominance and attachment dimensions of dog-human relationships

A1 - Rooney,N.J.

A1 - Bradshaw,J.W.

Y1 - 2003///

N1 - Rooney, Nicola J. Bradshaw, John W S

Journal of applied animal welfare science : JAAWS

9804404

IM

Journal Article. Research Support, Non-U.S. Gov't

English

KW - Medline

KW - Rough and Tumble

KW - Animals

KW - Authoritarianism

KW - Behavior

KW - Animal

KW - Bonding

KW - Human-Pet

KW - Cooperative Behavior

KW - Dogs

KW - Female

KW - Humans

KW - Male

KW - Play and Playthings

KW - Questionnaires

RP - NOT IN FILE

SP - 67

EP - 94

JF - Journal of Applied Animal Welfare Science

JA - J Appl. Anim Welf. Sci

VL - 6

IS - 2

CY - United States

N2 - It is often claimed that certain behavioral problems in domestic dogs can be triggered by the games played by dog and caregiver (owner). In this study, we examine possible links between the types of games played and dimensions of the dog-owner relationship that are generally considered to affect such problems. Fifty dog-owner partnerships were filmed during 3-min play sessions in which the owner was allowed to choose the games played. All partnerships then undertook a 1-hr test designed to measure elements of behavior commonly ascribed to "dominance" and "attachment." Principal components analysis of the data produced 2 dominance-related factors (Amenability and Confident Interactivity) and 4 factors describing aspects of attachment (Nonspecific Attention Seeking, Preference for Owner, Preference for Unfamiliar Person, and Separation-Related Behavior). Amenability, in particular, varied significantly between breeds. In the study, we then compared types of games played to each of these factors. Dogs playing rough-and-tumble scored higher for Amenability and lower on Separation-Related Behavior than did dogs playing other types of games. Dogs playing tug-of-war and fetch scored high on Confident Interactivity. Winning or losing these games had no consistent effect on their test scores. If the dog started the majority of the games, the dog was significantly less amenable and more likely to exhibit aggression. The results suggest that how dogs play reflects general attributes of their temperament and relationship with their owner. This study provides no evidence that games play a major deterministic role on dominance dimensions of dog-human relationships, but the results suggest that playing games involving considerable body contact may affect attachment dimensions

SN - 1088-8705

AD - Anthrozoology Institute, University of Southampton

UR - 12909524

ER -

TY - JOUR

ID - 1033

T1 - Public health. Rough-and-tumble behind Bush's smallpox policy

A1 - Cohen, J.

A1 - Enserink, M.

Y1 - 2002/12/20/

N1 - Cohen, Jon. Enserink, Martin

Science (New York, N.Y.)

0404511, uj7

E, IM

News

English

KW - Medline

KW - Rough and Tumble

KW - Advisory Committees

KW - Bioterrorism/pc [Prevention & Control]

KW - Bioterrorism

KW - Clinical Trials as Topic

KW - Disease Outbreaks/pc [Prevention & Control]

KW - Health Personnel

KW - Health Policy

KW - Humans

KW - Immunization Programs

KW - Military Personnel

KW - Public Health

KW - Security Measures

KW - Smallpox/ep [Epidemiology]

KW - Smallpox/pc [Prevention & Control]

KW - Smallpox/tm [Transmission]

KW - Smallpox Vaccine/ae [Adverse Effects]

KW - Smallpox Vaccine/sd [Supply & Distribution]

KW - Smallpox Vaccine

KW - United States/ep [Epidemiology]

KW - United States Dept.of Health and Human Services

KW - Vaccination

RP - NOT IN FILE

SP - 2312

EP - 2316

JF - Science

VL - 298

IS - 5602

CY - United States

SN - 1095-9203

UR - 12493889

ER -

TY - JOUR

ID - 1034

T1 - Existential Motives in Play As Revealed in Gambling

A1 - Kusyszyn,Igor

Y1 - 1979/10//

N1 - Last updated - 2012-12-14

SubjectsTermNotLitGenreText - Adults 226 316 8016 4542; Existentialism 3676; Play 7940 126; Psychological Needs 8414 5058 6996; 8996; 9469 9451

KW - Gambling

KW - ERIC,Current Index to Journals in Education (CIJE)

KW - Risk

KW - Self Esteem

KW - Play

KW - Psychological Needs

KW - Adults

KW - Existentialism

KW - ERIC

RP - NOT IN FILE

SP - 59

EP - 60

JF - Journal of Physical Education and Recreation

VL - 50

IS - 8

N2 - Gambling as a sophisticated form of adult play reaffirms the individual's existence and confirms the individual's worth. (LH)

UR - <http://search.proquest.com/docview/63709712?accountid=14701>

ER -

TY - JOUR

ID - 1035

T1 - Low Birth Weight (LBW) Infants' Exploratory Behavior at 12 and 24 Months: Effects of Intraventricular Hemorrhage and Mothers' Attention Directing Behaviors

A1 - Landry,Susan H.

Y1 - 1993///

N1 - Last updated - 2012-12-14

SubjectsTermNotLitGenreText - 312 5054 2842; 694 8016 4542; Attention Control 723; 1019; Congenital Impairments 2118 2877; Exploratory Behavior 3711; 5118 11655 1474 316 8016 4542; Interaction 5348 8768; 6823 3932 8016 4542 7577 3816; Parent Child Relationship 7537 3851 5449 8768; 7719 5127; 7862 4634; 7940 126; 8112 5118 11655 1474 316 8016 4542; 10883 11655 1474 316 8016 4542

KW - Intraventricular Hemorrhage

KW - ERIC,Current Index to Journals in Education (CIJE)

KW - Birth Weight

KW - Interaction

KW - At Risk Persons

KW - Toddlers

KW - Play

KW - Mothers

KW - Exploratory Behavior

KW - Premature Infants

KW - Parent Child Relationship

KW - Attention Control

KW - Physical Health

KW - Perinatal Influences

KW - Age Differences

KW - Infants

KW - Congenital Impairments

KW - ERIC

RP - NOT IN FILE

SP - 237

EP - 249

JF - Research in Developmental Disabilities

JA - Res.Dev.Disabil.

VL - 14

IS - 3

N2 - This study of infants with low birthweight and significant or mild intraventricular hemorrhage showed that the association of mothers' interactive behaviors with infants' exploratory play responses was dependent on both the age and medical risk status of the child. The timing of mothers' attention-directing strategies and the level of structure they provided were important variables. (JDD)

SN - 0891-4222, 0891-4222

UR - <http://search.proquest.com/docview/62889652?accountid=14701>

ER -

TY - BOOK

ID - 1036

T1 - Too Safe for Their Own Good? Helping Children Learn about Risk and Lifeskills

A1 - Lindon,Jennie

Y1 - 1999///

N1 - Availability - Level 2 - Produced in microfiche (1966-2003)

Last updated - 2012-12-14

KW - Risk Assessment

KW - Risk Reduction

KW - Risk Taking Behavior

KW - ERIC,Resources in Education (RIE)

KW - Early Childhood Education

KW - Travel

KW - Caregiver Child Relationship

KW - Teacher Student Relationship

KW - Play

KW - Young Children

KW - Parent Teacher Cooperation

KW - Safety

KW - Child Safety

KW - Risk

KW - Accidents

KW - Self Care Skills

KW - Foreign Countries

KW - Risk Management

KW - Personal Autonomy

KW - Self Evaluation (Groups)

KW - ERIC

RP - NOT IN FILE

SP - 75

PB - National Early Years Network, 77 Holloway Road, London N7 8JZ, England, United Kingdom; Tel: 0207-607-9573; Fax: 0207-700-1105; email: NationalEarlyYearsNetwork@compuserve.com (8.50 British Pounds Sterling).

N2 - Because young children have a limited understanding of risks that surround them, many adults try to create a risk-free environment for them. Suggesting that this strategy may leave children without the skills to manage risk and may make it difficult for them to judge situations for themselves, this book provides a practical guide showing adults how they can share their skills with young children and teach them about safety in a caring, supervised environment. Chapter 1 discusses the use of risk assessment in early childhood settings. Chapter 2 examines what and how children learn about safety from birth to age 8 years. Chapter 3 discusses how adults can deal with accidents in a way that will support children's learning, focusing on a problem-solving approach and providing emotional support, while chapter 4 provides strategies adults can use to share their experience with children, including coaching and sharing skills. Chapter 5 details the opportunities for learning self-care and caring skills in early childhood settings, including hygiene, basic first aid, and fire and heat. Chapter 6 deals with ways of providing balance between safety and a decent challenge in physical play. Chapter 7 discusses the use of tools in early childhood activities such as crafts and gardening and ways to increase children's ability to take responsibility. Chapter 8 examines child safety during travel and their increasing ability for independent travel. Chapter 9 discusses sharing responsibility with parents regarding children's safety. Chapter 10 presents staff activities for ensuring safe, enjoyable play. (KB)

SN - 1870985532

UR - <http://search.proquest.com/docview/62376279?accountid=14701>

ER -

TY - JOUR

ID - 1037

T1 - Risk, Challenge and Safety: Implications for Play Quality and Playground Design

A1 - Little,Helen

A1 - Eager,David  
Y1 - 2010/12//  
N1 - Last updated - 2012-12-14  
SubjectsTermNotLitGenreText - 7940 126; 9074; 7943 8704 3760; 5472 3629 6582; 4109 4335; 8127 11655  
1474 316 8016 4542; 8996; 1443 5053 2787; 1432 909; 1434 3760; 8130 3085 3150; 3553  
KW - Australia  
KW - Structured Interviews  
KW - ERIC,Current Index to Journals in Education (CIJE)  
KW - Preschool Education  
KW - Equipment  
KW - Play  
KW - Child Behavior  
KW - Safety  
KW - Risk  
KW - Foreign Countries  
KW - Playgrounds  
KW - Child Development  
KW - Interviews  
KW - Preschool Children  
KW - Child Care Centers  
KW - ERIC  
RP - NOT IN FILE  
SP - 497  
EP - 513  
JA - European Early Childhood Education Research Journal  
VL - 18  
IS - 4  
PB - Routledge. , 325 Chestnut Street Suite 800, Philadelphia, PA 19106.  
N2 - In many countries playground design is driven more by safety than developmental benefits. As risk minimisation strategies become more stringent, many researchers and practitioners are questioning whether young children are able to take sufficient risks in play in order for their play experiences to be interesting and developmentally challenging. This study examined the outdoor play choices and risk-taking behaviour of 38 children (25 boys, 13 girls) aged between 48 and 64 months from Sydney, Australia. Semi-structured interviews examined children's play preferences and playground equipment usage. Observations of play explored engagement in risk-taking behaviour. Selection of equipment indicated a strong preference for challenge and excitement. However, the dominant observed play behaviours involved little risk suggesting equipment at these parks provided few opportunities to practice mastery of skills already in their behavioural repertoire, learning new skills or building on current capabilities. The findings have implications for play provision and playground design. (Contains 3 tables and 2 figures.)  
SN - 1350-293X, 1350-293X  
UR - <http://search.proquest.com/docview/851231337?accountid=14701>  
ER -  
  
TY - JOUR  
ID - 1038  
T1 - The rough and tumble of it. Hospitals flexing their muscles in contract disputes with insurers  
A1 - Benko,L.B.  
A1 - Bellandi,D.  
Y1 - 2001/03//  
N1 - Benko, L B. Bellandi, D  
Modern healthcare  
nfa, 7801798  
H  
Journal Article  
English  
KW - Medline

KW - Rough and Tumble  
KW - Conflict (Psychology)  
KW - Hospital Administration  
KW - Insurance  
KW - Hospitalization  
KW - Negotiating  
KW - Reimbursement Mechanisms  
KW - United States  
RP - NOT IN FILE  
SP - 52  
EP - 56  
JF - Modern Healthcare  
JA - Mod.Healthc.  
VL - 31  
IS - 12  
CY - United States  
SN - 0160-7480  
UR - 11299955  
ER -  
  
TY - JOUR  
ID - 1039  
T1 - Relationship between Parents' Beliefs and Their Responses to Children's Risk-Taking Behaviour during Outdoor Play  
A1 - Little,Helen  
Y1 - 2010/10//  
N1 - Last updated - 2012-12-14  
SubjectsTermNotLitGenreText - 7940 126; 7554 9015; 7943 8704 3760; 7531 730; 932 730; 8996; 11655 1474 316 8016 4542; 1432 909; 728 6447; 8535 6447; 5472 3629 6582; 7234; 1463 9074; 9822; 4109 4335  
KW - Australia  
KW - ERIC,Current Index to Journals in Education (CIJE)  
KW - Early Childhood Education  
KW - Questionnaires  
KW - Play  
KW - Child Behavior  
KW - Young Children  
KW - Parent Role  
KW - Observation  
KW - SOCIALIZATION  
KW - Child Safety  
KW - Risk  
KW - Foreign Countries  
KW - Playgrounds  
KW - Parent Attitudes  
KW - Interviews  
KW - Attitude Measures  
KW - Beliefs  
KW - ERIC  
RP - NOT IN FILE  
SP - 315  
EP - 330  
JA - Journal of Early Childhood Research  
VL - 8  
IS - 3  
PB - SAGE Publications. 2455 Teller Road, Thousand Oaks, CA 91320.

N2 - Learning how to respond appropriately in risk situations comes not only from the child's direct experiences but also through the guidance of those around them. The role of parent practices in guiding children's decision-making in risky situations has mainly been investigated in experimental contexts. The present study examined children's risk-taking behaviour and parent responses in everyday outdoor play settings. Parents' own risk-taking beliefs and behaviours were assessed using the Attitudes Towards Risk Questionnaire (ATR). Interviews explored parents' attitudes towards children's risk-taking and parents (11 mothers, one father) were observed as they supervised their four- to five-year-old children on playground equipment at a park. Parents' ATR scores were predictive of children's risk-taking behaviour. Parents mainly supervised their child's play and provided encouragement and support to foster children's engagement in challenging use of the equipment. Parents rarely intervened to prevent children's risky play but provided advice on how to complete the activity safely. Parents emphasized that their responses to children's risk-taking are context dependent. (Contains 5 tables.)

SN - 1476-718X, 1476-718X

UR - <http://search.proquest.com/docview/822506636?accountid=14701>

ER -

TY - JOUR

ID - 1040

T1 - The Influence of Play Context and Adult Attitudes on Young Children's Physical Risk-Taking during Outdoor Play

A1 - Little,Helen

A1 - Wyver,Shirley

A1 - Gibson,Frances

Y1 - 2011/03//

N1 - Last updated - 2012-12-14

SubjectsTermNotLitGenreText - 7940 126; 7943 8704 3760; 5472 3629 6582; 8127 11655 1474 316 8016 4542; 8996; 2177 5127; 226 316 8016 4542; 5183 2877; 7234; 6816 7531 730; 8135 10591 8267 3417 8016 4542 5703 4908 8917; 10482 730; 9074; 8535 6447; 6447; 4109 4335

KW - Australia

KW - ERIC,Current Index to Journals in Education (CIJE)

KW - Preschool Education

KW - Preschool Teachers

KW - Context Effect

KW - Measures (Individuals)

KW - Questionnaires

KW - Play

KW - Injuries

KW - Safety

KW - Teacher Attitudes

KW - Mother Attitudes

KW - Observation

KW - Adults

KW - Risk

KW - Foreign Countries

KW - Playgrounds

KW - Interviews

KW - Preschool Children

KW - ERIC

RP - NOT IN FILE

SP - 113

EP - 131

JA - European Early Childhood Education Research Journal

VL - 19

IS - 1

PB - Routledge. , 325 Chestnut Street Suite 800, Philadelphia, PA 19106.

N2 - Many children naturally seek challenging physically active play which may involve injury-risk. Prior studies have attempted to describe the characteristics of risky play but to date none have considered factors that



impact on opportunities for risky play or the likely resultant outcomes. Using semi-structured interviews and naturalistic observations, this study aimed to investigate adult attitudes towards risk-taking and whether children's experiences of risky play differ according to the contexts in which the play takes place. Although the children's mothers and Early Childhood practitioners believed risky play was an important aspect of learning and development and encouraged this type of play, observations of children's play at a local playground and their Early Childhood centre revealed that these contexts provided limited opportunities for risky play. Regulatory factors and requirements for playground safety were identified as having a detrimental impact on the quality of play in these settings creating tension between adult beliefs about the benefits of risky play and its provision. (Contains 6 tables.)

SN - 1350-293X, 1350-293X

UR - <http://search.proquest.com/docview/864940635?accountid=14701>

ER -

TY - JOUR

ID - 1041

T1 - Early Childhood Teachers' Beliefs about Children's Risky Play in Australia and Norway

A1 - Little,Helen

A1 - Sandseter,Ellen Beate Hansen

A1 - Wyver,Shirley

Y1 - 2012///

N1 - Last updated - 2013-05-02

SubjectsTermNotLitGenreText - 11465 8522; 10621 3227 6582; 2784 4335; 4109 4335; 7940 126; 8135 10591 8267 3417 8016 4542 5703 4908 8917; 10482 730; 2362; 5933 8234; 8996; 3916 4398; 2653 1710; 9506 5472 3629 6582; 8127 11655 1474 316 8016 4542

KW - Australia

KW - Norway

KW - ERIC,Current Index to Journals in Education (CIJE)

KW - Early Childhood Education

KW - Preschool Education

KW - Preschool Teachers

KW - Legal Problems

KW - Play

KW - Well Being

KW - Teacher Attitudes

KW - Semi Structured Interviews

KW - Decision Making

KW - Risk

KW - Foreign Countries

KW - Developed Nations

KW - Federal Regulation

KW - Court Litigation

KW - Preschool Children

KW - Teaching Methods

KW - ERIC

RP - NOT IN FILE

SP - 300

EP - 316

JF - Contemporary Issues in Early Childhood

VL - 13

IS - 4

PB - Symposium Journals. P.O. Box 204, Didcot, Oxford, OX11 9ZQ, UK. Tel: +44-1235-818-062; Fax: +44-1235-817-275; e-mail: [subscriptions@symposium-journals.co.uk](mailto:subscriptions@symposium-journals.co.uk); Web site: <http://www.wwwords.co.uk/ciec>

N2 - Positive risk-taking in the context of outdoor physical play is important for fostering children's optimal health and development. Despite this, there is mounting concern that many developmentally beneficial activities are now seen as dangerous and something to be avoided. However, perceptions of risk are very much subject to cultural interpretation, and the growing risk aversion evident in some developed Western societies, such as

Australia, the United Kingdom and the United States of America, is less apparent in other developed countries, notably some of the European and Scandinavian countries. To explore some of these cultural differences, early childhood practitioners from Australia and Norway were interviewed regarding their provision of outdoor play experiences for children and their attitudes towards risk-taking in play. Practitioners from both countries recognised the importance of risky play for children's development and well-being. However, differences in the extent to which children's risky play was supported were evident. Factors associated with the quality of the outdoor environment, regulatory requirements, and a litigious environment were identified as constraining teaching practice for the Australian practitioners. The findings have implications for the development of policy that supports teachers' pedagogical decision-making in providing developmentally challenging play environments for children. (Contains 1 table.)

SN - 1463-9491, 1463-9491

UR - <http://search.proquest.com/docview/1347461119?accountid=14701>

ER -

TY - JOUR

ID - 1042

T1 - Physical play and cognitive development: integrating activity, cognition, and education

A1 - Bjorklund,D.F.

A1 - Brown,R.D.

Y1 - 1998/06//

N1 - Bjorklund, D F. Brown, R D

Child development

0372725, d28

IM

Comment. Journal Article

English

KW - Medline

KW - Rough and Tumble

KW - Adolescent

KW - Adult

KW - Child

KW - Child Development

KW - Preschool

KW - Cognition

KW - Exercise

KW - Female

KW - Humans

KW - Infant

KW - Newborn

KW - Learning

KW - Male

KW - Motor Skills

KW - Play and Playthings

KW - Sex Factors

KW - SOCIALIZATION

KW - Space Perception

RP - NOT IN FILE

SP - 604

EP - 606

JF - Child Development

JA - Child Dev.

VL - 69

IS - 3

CY - UNITED STATES

N2 - We propose that humans may have evolved a special sensitivity to certain types of social information during rough-and-tumble play that facilitates social cognition. The cognitive benefits of physical play are

described as providing a break from demanding intellectual tasks, and are hypothesized to be related to gender differences in spatial cognition

SN - 0009-3920

AD - Department of Psychology, Florida Atlantic University, Boca Raton 33431, USA. DBjorklund@fau.edu

UR - 9680673

ER -

TY - JOUR

ID - 1043

T1 - Kindezi: A Distinctively Africentric Perspective on Early Childhood Education. Developmentally Appropriate Practice

A1 - Lowden,Frances Y.

Y1 - 2000///

N1 - Last updated - 2012-12-14

SubjectsTermNotLitGenreText - Afrocentrism 304; 1050; Culturally Relevant Education 2501 3150 8774 2494; 2802 3242; Early Childhood Education 3085 3150; 3211 4164 4770 4918 5964 9804 9351; Educational Philosophy 3236 4164 7807 4918 5964; 4723; 7940 126; Preschool Curriculum 8129 2515; Young Children 11655 1474 316 8016 4542

KW - Africa

KW - ERIC,Current Index to Journals in Education (CIJE)

KW - Early Childhood Education

KW - Preschool Curriculum

KW - High Risk Students

KW - Afrocentrism

KW - Play

KW - Culturally Relevant Education

KW - Young Children

KW - Developmentally Appropriate Practices

KW - Black Students

KW - Educational History

KW - Educational Philosophy

KW - ERIC

RP - NOT IN FILE

SP - 7

EP - 12

JF - Journal of Early Education and Family Review

VL - 8

IS - 1

N2 - Presents the Kindezian philosophy of early childhood education, a historical developmentally appropriate Africentric worldview. Describes the curriculum as predating Western curriculum development by centuries. Maintains that Kindezi affords children the possibility to develop their full potential and that it provides a framework on which to respond to educational needs of African children and the descendants of the African diaspora. (KB)

SN - 1084-6603, 1084-6603

UR - <http://search.proquest.com/docview/62335699?accountid=14701>

ER -

TY - JOUR

ID - 1044

T1 - Generalization of Parenting Skills: An Early Intervention Program

A1 - Lowry,Mark A.

A1 - Whitman,Thomas L.

Y1 - 1989///

N1 - Last updated - 2012-12-14

SubjectsTermNotLitGenreText - 150 909; 914 2094; Early Intervention 3090 5470; Generalization 4314 18 1710 5904; 4722; 5118 11655 1474 316 8016 4542; Interaction 5348 8768; Mothers 6823 3932 8016 4542 7577

3816; 7537 3851 5449 8768; Parent Education 7540 210 3150; Parenting Skills 7575 9690 1; 7576 909; 7940 126; 8301 3626; 9021 9651 6582; 10883 11655 1474 316 8016 4542

KW - Developmental Delays

KW - Early Intervention Programs

KW - Home Start Program

KW - Observational Studies

KW - ERIC,Current Index to Journals in Education (CIJE)

KW - Parent Education

KW - Parenting Skills

KW - Interaction

KW - Toddlers

KW - Play

KW - High Risk Persons

KW - Mothers

KW - Generalization

KW - Role Playing

KW - Parenting Styles

KW - Behavior Modification

KW - Adjustment (to Environment)

KW - Parent Child Relationship

KW - Early Intervention

KW - Program Evaluation

KW - Infants

KW - ERIC

RP - NOT IN FILE

SP - 45

EP - 65

JF - Child and Family Behavior Therapy

VL - 11

IS - 1

N2 - In a short-term, intensive parent-training program, mothers of developmentally delayed infants are shown how to teach their children toy play behaviors. This study evaluates intervention effects on parents and children, with a focus on maternal behaviors. Results indicate improved maternal teaching behavior and generalizability of positive parenting style. (AF)

UR - <http://search.proquest.com/docview/63164062?accountid=14701>

ER -

TY - GEN

ID - 1045

T1 - INDAP: Individualizing Developmentally Appropriate Practices for Young Children with Special Needs

A1 - Mahoney,Gerald

A1 - Wheeden,Abbie

A1 - Janas,Debra

Y1 - 1996///

N1 - Availability - Level 3 - Indexed only

Last updated - 2012-12-14

KW - ERIC,Resources in Education (RIE)

KW - Practitioners

KW - Teachers

KW - Early Childhood Education

KW - At Risk Persons

KW - High Risk Students

KW - Play

KW - Class Activities

KW - Individualized Instruction

KW - Classroom Environment

KW - Child Behavior

KW - Special Needs Students

KW - Individual Needs

KW - Curriculum Development

KW - Disabilities

KW - Developmentally Appropriate Practices

KW - Early Intervention

KW - Individualized Education Programs

KW - ERIC

RP - NOT IN FILE

SP - 106

PB - Family Child Learning Center, 143 Northwest Avenue, Building A, Tallmadge, OH 44278; phone: 330-633-2055 (\$18, plus \$3 shipping and handling. Make check payable to Children's Hospital Foundation; quantity discounts available).

N2 - The INDAP (Individualizing Developmentally Appropriate Practices) program provides teachers with ideas on how to design classroom environments and materials, activities and routines, and instructional groups and transitions while providing high quality programs to children with different strengths and needs. These guidelines provide information about the philosophy of the Developmentally Appropriate Practice (DAP) model of early childhood education and focuses on the processes of active engagement by employing four instructional strategies: (1) developmental match; (2) interest match; (3) behavioral style match; and (4) enjoyment.

Following the introduction in chapter 1, chapter 2 focuses on understanding the DAP approach to early childhood education. Chapter 3 describes INDAP guidelines for an interactive match. Chapter 4 examines play and the concepts of active learning, exploration, manipulation, problem solving, and initiation. Chapter 5 focuses on curriculum and how observations of children can be used to plan developmentally appropriate learning experiences. Chapter 6 focuses on environment and materials, including how to arrange the classroom environment to more effectively address children's developmental needs, while chapter 7 describes characteristics of daily activities and opportunities that effectively promote children's learning. Chapter 8 focuses on behavior and how to help children manage themselves by giving them developmentally appropriate choices and helping them make good decisions. (SD)

UR - <http://search.proquest.com/docview/62488285?accountid=14701>

ER -

TY - JOUR

ID - 1046

T1 - Wendy or Tinkerbell? How the Underrepresentation of Girls Impacts Gender Roles in Preschool Special Education

A1 - Manwaring, Joanne S.

Y1 - 2008//

N1 - Last updated - 2012-12-14

SubjectsTermNotLitGenreText - 3932 8016 4542; 2941 2700 9804 9351 5964; 2877; 8127 11655 1474 316 8016 4542; 9776 9761 3518; 9925 3150; 10621 3227 6582; 4290; 9456 1620 3199 3760; 695 694 8016 4542; 10195 2787; 1716 8409 5051; 10496 1970 1; 2879 4954; 8135 10591 8267 3417 8016 4542 5703 4908 8917; 7940 126; 5748 11228 1703 5053 2787; 9753 5053 2787; 9685 5053 2787

KW - ERIC, Current Index to Journals in Education (CIJE)

KW - Preschool Education

KW - Preschool Teachers

KW - Language Acquisition

KW - Play

KW - Special Education

KW - Gender Differences

KW - Disability Identification

KW - Student Development

KW - Cognitive Style

KW - Skill Development

KW - Teacher Competencies

KW - Self Contained Classrooms

KW - At Risk Students  
KW - Disabilities  
KW - Social Development  
KW - Social Isolation  
KW - Females  
KW - Preschool Children  
KW - Disproportionate Representation  
KW - Teaching Methods  
KW - ERIC  
RP - NOT IN FILE  
SP - 60  
EP - 65  
JF - TEACHING Exceptional Children  
VL - 40  
IS - 5  
PB - Council for Exceptional Children. 1110 North Glebe Road Suite 300, Arlington, VA 22201.  
N2 - The scope of this article is to discuss the impact of underrepresentation of girls in separate, self-contained special education classes for preschool children in a large school district in the southeastern United States. On a regular basis, preschool girls identified with special needs are being placed in self-contained classes where there they may be the only girl. The underrepresentation of girls in preschool self-contained special education classes results in social isolation and places the girls at risk for appropriate language, social, academic, and play skills. Teachers need to be sure to teach to all of the learning styles in their classrooms and to promote social interactions between both genders to help alleviate the lack of same-gender opportunities for girls  
SN - 0040-0599, 0040-0599  
UR - <http://search.proquest.com/docview/61861814?accountid=14701>  
ER -  
  
TY - JOUR  
ID - 1047  
T1 - Internet Gambling Behavior in a Sample of Online Gamblers  
A1 - McBride, Jessica  
A1 - Derevensky, Jeffrey  
Y1 - 2009/01//  
N1 - Last updated - 2012-12-14  
SubjectsTermNotLitGenreText - 5434 5147 7051 2045; 7940 126; 545 9738 909; 916 8234; 8535 6447; 4270 126; 5013; 7615 909; 694 8016 4542; 3018 909; 3049 909; 141 9458 909 913 2877; 6531 2877  
KW - ERIC, Current Index to Journals in Education (CIJE)  
KW - Drinking  
KW - At Risk Persons  
KW - Questionnaires  
KW - Play  
KW - Behavior Problems  
KW - Antisocial Behavior  
KW - Addictive Behavior  
KW - Mental Disorders  
KW - Participation  
KW - Incidence  
KW - Games  
KW - Drug Use  
KW - Internet  
KW - ERIC  
RP - NOT IN FILE  
SP - 149  
EP - 167  
JF - International Journal of Mental Health and Addiction  
VL - 7

IS - 1

PB - Springer. 233 Spring Street, New York, NY 10013.

N2 - The present study examined Internet gambling behavior in a sample of online gamblers. Participants (N = 563; 382 male; ages 18-over 65) were recruited from a banner placed in an online newsletter. Questionnaires were completed online and assessed demographic information, game-play patterns (e.g., frequency, duration, wagering), preferred type of play, and problem gambling (using the DSM-IV). In addition, participation in gambling-type games without money was also examined. Seventy-seven percent of respondents reported playing gambling-type games without money and 42% reported gambling on the Internet. Twenty-three percent of participants were identified as problem gamblers. Problem gamblers were significantly more likely than social gamblers to spend more time gambling per session, gamble alone, from school, or with a cell phone, gamble with more money, wager online while consuming alcohol or illicit drugs, and lose more money gambling online. These results hint at a disturbing and difficult relationship between the Internet and individuals with gambling problems

SN - 1557-1874, 1557-1874

UR - <http://search.proquest.com/docview/61903785?accountid=14701>

ER -

TY - JOUR

ID - 1048

T1 - Infant Special Education: Interactions with Objects

A1 - McCune,Lorraine

A1 - Ruff,Holly A.

Y1 - 1985///

N1 - SuppNotes - Theme Issue: Developmental Toys

Last updated - 2012-12-14

SubjectsTermNotLitGenreText - 1443 5053 2787; 2877; High Risk Persons 4722; Infants 5118 11655 1474 316 8016 4542; 6296 5258 3224; Object Manipulation 7225 8426 9690 1; Play 7940 126; 10436 7688 1710; 10910

KW - ERIC,Current Index to Journals in Education (CIJE)

KW - Practitioners

KW - Play

KW - Object Manipulation

KW - High Risk Persons

KW - Disabilities

KW - Child Development

KW - Toys

KW - Tactual Perception

KW - Manipulative Materials

KW - Infants

KW - ERIC

RP - NOT IN FILE

SP - 59

EP - 68

JF - Topics in Early Childhood Special Education

VL - 5

IS - 3

N2 - Research on object exploration by infants addresses milestones in the process by normally developing infants, including spontaneous manipulation strategies. Implications for developmentalists working with high-risk preterm infants are noted, including the need for direct assistance in manipulation and for selection of materials. (CL)

UR - <http://search.proquest.com/docview/63309370?accountid=14701>

ER -

TY - JOUR

ID - 1049

T1 - The Benefits of Using Sociodrama in the Elementary Classroom: Promoting Caring Relationships among Educators and Students

A1 - McLennan, Deanna Marie Pecaski

Y1 - 2008/04//

N1 - Last updated - 2012-12-14

SubjectsTermNotLitGenreText - 9021 9651 6582; 3190 3518; 2521 3184 2787; 3005 9021 9651 6582; 9469 9451; 9473; 8996; 3400 8415; 10576 5449 8768; 1571 9146 126

KW - ERIC, Current Index to Journals in Education (CIJE)

KW - Teachers

KW - Elementary Education

KW - Risk

KW - Teacher Student Relationship

KW - Class Activities

KW - Self Esteem

KW - Curriculum Development

KW - Educational Environment

KW - Dramatic Play

KW - Role Playing

KW - Self Expression

KW - Empathy

KW - ERIC

RP - NOT IN FILE

SP - 451

EP - 456

JF - Early Childhood Education Journal

VL - 35

IS - 5

PB - Springer. 233 Spring Street, New York, NY 10013.

N2 - In the current age of academic rigor, standards and accountability, the fostering of caring relationships in the classroom may not always be a priority. Expressing care for another person is a skill that can be taught and nurtured through a supportive educational environment. Sociodrama encourages each of its participants to develop self-confidence and self-expression through risk-taking and exploration in activities that explore real life personal feelings and situations. By using sociodrama as a means for exploring issues in the classroom it is possible to celebrate participants' individuality and to create caring and nurturing relationships among educators and students. This article examines the research describing the benefits of including sociodrama in the elementary curriculum

SN - 1082-3301, 1082-3301

UR - <http://search.proquest.com/docview/61968793?accountid=14701>

ER -

TY - JOUR

ID - 1050

T1 - Gender labels and play styles: their relative contribution to children's selection of playmates

A1 - Alexander, G.M.

A1 - Hines, M.

Y1 - 1994/06//

N1 - Alexander, G M. Hines, M

Child development

0372725, d28

IM

Comparative Study. Journal Article. Research Support, U.S. Gov't, P.H.S.

English

KW - Medline

KW - Rough and Tumble

KW - Age Factors

KW - Child Behavior

KW - Child

KW - Preschool



KW - Choice Behavior

KW - Female

KW - Humans

KW - Interview

KW - Psychological

KW - Male

KW - Photic Stimulation

KW - Play and Playthings

KW - Sex

KW - Sex Factors

KW - Task Performance and Analysis

RP - NOT IN FILE

SP - 869

EP - 879

JF - Child Development

JA - Child Dev.

VL - 65

IS - 3

CY - UNITED STATES

N2 - The relative contribution of gender labels and play styles (masculine or feminine) in playmate selection was evaluated in 60 children between the ages of 4 and 8 years using a novel interview measure. In the interview, when targets' gender labels and targets' play styles were presented as independent dimensions, children showed predicted sex differences in preferences for gender labels and for play styles (including toys, rough-and-tumble play, and activity level). However, when targets' gender labels and targets' play styles were presented as competing dimensions, boys of all ages chose female targets with masculine play styles over male targets with feminine play styles. In contrast, younger girls (4-5-year-olds) chose female targets with masculine play styles, whereas older girls (6-8-year-olds) chose male targets with feminine play styles. This suggests possible sex differences in the contribution of gender labels and of play styles in the development of children's preferences for same-sexed playmates

SN - 0009-3920

AD - University of California, Los Angeles

UR - 8045173

ER -

TY - JOUR

ID - 1051

T1 - Bob Bear: A Strategy for Improving Behaviors of Preschoolers Identified as At Risk or Developmentally Delayed

A1 - Michael,Meredith

A1 - Meese,Ruth L.

A1 - Keith,Stephen

A1 - Mathews,Rachel

Y1 - 2009///

N1 - Last updated - 2012-12-14

SubjectsTermNotLitGenreText - 5913 10830; 7940 126; 5470; 122 8836; 8127 11655 1474 316 8016 4542; 2790; 695 694 8016 4542; 914 2094; 5246 2768; 3264 3227 6582; 4232 3629 6582; 8130 3085 3150

KW - ERIC,Current Index to Journals in Education (CIJE)

KW - Teachers

KW - Preschool Education

KW - Educational Strategies

KW - Play

KW - Action Research

KW - Developmental Delays

KW - Intervention

KW - Instructional Design

KW - Functional Behavioral Assessment

KW - At Risk Students

KW - Behavior Modification

KW - Learning Theories

KW - Preschool Children

KW - ERIC

RP - NOT IN FILE

SP - 54

EP - 59

JF - TEACHING Exceptional Children

VL - 41

IS - 5

PB - Council for Exceptional Children. 1110 North Glebe Road Suite 300, Arlington, VA 22201.

N2 - Social learning theory, sociodramatic play, and the use of puppets and stuffed animals may be beneficial for improving social behaviors of preschoolers with and without disabilities. Therefore, this action research study is developed on the belief that a stuffed animal (Bob Bear) will enhance appropriate behaviors for preschool children when used by teachers as a part of their behavior management program. Teachers strategically harness sociodramatic play, helping preschoolers imagine that Bob Bear is a member of the class who can talk and display behaviors like all other children in the classroom. Thus, Bob Bear will be utilized daily as a teaching/learning tool to model, role play, and reinforce expected behaviors in the preschool classroom. The authors conclude that additional research is needed to determine whether or not this intervention strategy, used in this article for preschoolers identified as at risk or with developmental delays, might prove helpful with preschoolers having other exceptional needs. (Contains 3 figures and 1 table.)

SN - 0040-0599, 0040-0599

UR - <http://search.proquest.com/docview/61878991?accountid=14701>

ER -

TY - JOUR

ID - 1052

T1 - Prenatal exposure to diethylstilbestrol (DES): childhood play behavior and adult gender-role behavior in women

A1 - Lish,J.D.

A1 - Meyer-Bahlburg,H.F.

A1 - Ehrhardt,A.A.

A1 - Travis,B.G.

A1 - Veridiano,N.P.

Y1 - 1992/10//

N1 - Lish, J D. Meyer-Bahlburg, H F. Ehrhardt, A A. Travis, B G. Veridiano, N P

Archives of sexual behavior

8gr, 1273516

IM

Journal Article. Research Support, Non-U.S. Gov't. Research Support, U.S. Gov't, P.H.S.

English

KW - Medline

KW - Rough and Tumble

KW - Adolescent

KW - Adult

KW - Child

KW - Preschool

KW - Diethylstilbestrol/ae [Adverse Effects]

KW - Female

KW - Follow-Up Studies

KW - Gender Identity

KW - Humans

KW - Play and Playthings

KW - Pregnancy

KW - Prenatal Exposure Delayed Effects

RP - NOT IN FILE

SP - 423

EP - 441

JF - Archives of Sexual Behavior

JA - Arch.Sex Behav

VL - 21

IS - 5

CY - UNITED STATES

N2 - Data from lower mammals suggest a masculinizing or defeminizing influence of pre- or perinatal diethylstilbestrol (DES) exposure on various aspects of the sex-dimorphic behavior (including juvenile rough-and-tumble play) of genetic females. However, three previous studies on childhood play and adult gender-role behavior in human females have led to ambiguous results. In a follow-up study of 60 women with prenatal exposure to DES and 26 controls, we used psychometrically well-designed multi-item scales based on self-report inventories for the assessment of these aspects of behavior. No effects of DES could be demonstrated. We conclude that, at the doses studied, prenatal DES exposure in human females has not led to behavioral masculinization or defeminization of childhood play and adult gender-role behavior

SN - 0004-0002

AD - New York State Psychiatric Institute, New York

UR - 1417473

ER -

TY - JOUR

ID - 1053

T1 - Naltrexone open trial with a 5-year-old-boy. A social rebound reaction

A1 - Lensing,P.

A1 - Klingler,D.

A1 - Lampl,C.

A1 - Leboyer,M.

A1 - Bouvard,M.

A1 - Plumet,M.H.

A1 - Panksepp,J.

Y1 - 1992///

N1 - Lensing, P. Klingler, D. Lampl, C. Leboyer, M. Bouvard, M. Plumet, M H. Panksepp, J

Acta paedopsychiatrica

1ms, 0400661

IM

Journal Article

English

KW - Medline

KW - Rough and Tumble

KW - Attention Deficit Disorder with Hyperactivity/dt [Drug Therapy]

KW - Attention Deficit Disorder with Hyperactivity/px [Psychology]

KW - Autistic Disorder/dt [Drug Therapy]

KW - Autistic Disorder/px [Psychology]

KW - Child

KW - Preschool

KW - Humans

KW - Intellectual Disability/dt [Drug Therapy]

KW - Intellectual Disability/px [Psychology]

KW - Male

KW - Naltrexone/tu [Therapeutic Use]

KW - Personality Assessment

KW - Social Behavior

RP - NOT IN FILE

SP - 169

EP - 173

JF - Acta Paedopsychiatrica

JA - Acta Paedopsychiatr.

VL - 55

IS - 3

CY - GERMANY

N2 - The neurobiological rationale for an opiate antagonist pharmacotherapy of autism is presented. Naltrexone efficacy in decreasing autistic behaviour and in increasing social-affiliative behaviour was explored in a 5-year-old autistic boy. Naltrexone (0.5 mg/kg 3 times per week) was effective in immediately decreasing gross motor activity and stereotyped behaviour and caused a delayed increase of crying, smiling and rough-and-tumble play. This single case presents preliminary evidence that a therapeutically valuable rebound reaction is possible and that the human opioid system modulates social-affective processes. The possibility of psychological factors being instrumental in achieving this effect is discussed as being suitable for future clinical trials

SN - 0001-6586

AD - School Psychology of Upper Austria, Linz

UR - 1414352

ER -

TY - JOUR

ID - 1054

T1 - Interpartner Conflict and Child Abuse Risk among African American and Latino Adolescent Parenting Couples

A1 - Moore,David R.

A1 - Florsheim,Paul

Y1 - 2008/04//

N1 - Last updated - 2012-12-14

SubjectsTermNotLitGenreText - 5470; 1429 545 9738 909; 324 545 9738 909; 8168; 2112; 7576 909; 1459; 8105; 197 316 8016 4542; 4759 7160 8016 4542; 293 7160 8016 4542; 3862 11282 545 9738 909; 5449 8768; 7940 126; 7537 3851 5449 8768; 694 8016 4542

KW - ERIC,Current Index to Journals in Education (CIJE)

KW - At Risk Persons

KW - Play

KW - African Americans

KW - Intervention

KW - Conflict

KW - Pregnancy

KW - Prevention

KW - Parenting Styles

KW - Hispanic Americans

KW - Parent Child Relationship

KW - Child Rearing

KW - Family Violence

KW - Interpersonal Relationship

KW - Aggression

KW - Child Abuse

KW - Adolescents

KW - ERIC

RP - NOT IN FILE

SP - 463

EP - 475

JF - Child Abuse & Neglect: The International Journal

VL - 32

IS - 4

PB - Elsevier. 6277 Sea Harbor Drive, Orlando, FL 32887-4800.

N2 - Objective: The goal of this study was to identify links between observed conflict interactions and risk for child abuse and harsh parenting among a multiethnic sample of adolescent mothers (14-19 years) and young fathers (14-24 years). Methods: Prior to childbirth (T1), observation-based relationship data were collected from

154 expectant adolescent couples as well as information about physical aggression between partners. Two years after childbirth (T2), data relevant to harsh disciplinary practices and child abuse-prone attitudes were collected from both young mothers and fathers. Multiple regression analyses were run to examine the correspondence between (a) couples' relationship quality prior to childbirth and (b) subsequent risk for harsh and potentially abusive parenting practices. Results: Findings indicated that interpartner violence prior to childbirth predicted physically punitive parenting behavior for fathers, but not for mothers. Young mothers and fathers observed to be more warmly engaged with each other during their pre-birth couple interactions (T1) reported lower rates of physically punitive parenting behavior with their children at T2. Couples' hostility at T1 predicted fathers' level of observed hostility toward his child during a structured play activity at T2. Conclusions: Results underscore the importance of addressing the quality of couples' relations as means of preventing dysfunctional parenting practices among adolescent mothers and their partners. Adolescent mothers and their partners are at heightened risk for engaging in dysfunctional parenting, including child abuse. Focusing on pregnant adolescents and their partners, this study sought to identify interpersonal predictors of child abuse risk. Although this study did not involve administering prevention or intervention services, the goal was to test hypotheses that would inform the development of programs for young at-risk couples. Practice implications: The decision to recruit young couples prior to childbirth was based on the presumption that this period of time could provide a window of opportunity to administer couple-based child abuse prevention programs. Consistent with previous research on marital relations and parenting, results of this study support the idea that efforts to develop and administer preventive-intervention programs targeting at-risk couples could help reduce the occurrence of harsh parenting behavior and abuse

SN - 0145-2134, 0145-2134

UR - <http://search.proquest.com/docview/61969410?accountid=14701>

ER -

TY - GEN

ID - 1055

T1 - Miniperformances, Many Stars! Playing with Stories

A1 - Morado,Carolyn

A1 - Koenig,Rosalie

A1 - Wilson,Alice

Y1 - 1999///

N1 - Last updated - 2012-12-14

KW - ERIC,Current Index to Journals in Education (CIJE)

KW - Primary Education

KW - High Risk Students

KW - Class Activities

KW - Dramatic Play

KW - Story Telling

KW - Creative Dramatics

KW - Childrens Literature

KW - Literacy

KW - ERIC

RP - NOT IN FILE

SP - 116

EP - 123

JF - Reading Teacher

VL - 53

IS - 2

N2 - Describes a collaborative compensatory program for at-risk kindergarten, first-, and second-grade students, in which literature, drama, music, and movement are woven together into miniperformances that develop and support literacy learning. Discusses the process of developing a miniperformance, and lists suggested books with stories for miniperformances. (SR)

UR - <http://search.proquest.com/docview/62391837?accountid=14701>

ER -

TY - JOUR

ID - 1056

T1 - Initial dyadic peer interaction of attention deficit-hyperactivity disorder and normal boys

A1 - Hubbard,J.A.

A1 - Newcomb,A.F.

Y1 - 1991/04//

N1 - Hubbard, J A. Newcomb, A F

Journal of abnormal child psychology

0364547, h33

IM

Journal Article. Research Support, Non-U.S. Gov't

English

KW - Medline

KW - Rough and Tumble

KW - Attention Deficit Disorder with Hyperactivity/di [Diagnosis]

KW - Attention Deficit Disorder with Hyperactivity/px [Psychology]

KW - Child

KW - Humans

KW - Interpersonal Relations

KW - Male

KW - Peer Group

KW - Play and Playthings

KW - Social Behavior

KW - Verbal Behavior

RP - NOT IN FILE

SP - 179

EP - 195

JF - Journal of Abnormal Child Psychology

JA - J Abnorm.Child Psychol.

VL - 19

IS - 2

CY - UNITED STATES

N2 - The present study assessed the frequency and patterns of play duration and verbal behavior of medicated attention deficit-hyperactivity disorder (ADHD) boys in an initial social encounter with a normal, same-age peer. Eight pairs each of previously unacquainted ADHD/normal boys and normal/normal boys were videotaped as they interacted in a free-play setting (N = 32). The ADHD/normal dyads engaged in more solitary play and less associative play than the normal/normal dyads. Sequential analyses of the ADHD/normal dyads' play patterns revealed that they had problems in their progression along the play hierarchy, in sustaining associative play, and in avoiding withdrawal after rough and tumble play. In comparison to the normal/normal dyads, the ADHD/normal dyads also differed in the quality of verbal interaction as seen in their lower levels of verbal reciprocity and affective expression. Process explanations for the problems ADHD boys display in an initial social encounter and the implications of these difficulties for diminished socialization opportunities were discussed

SN - 0091-0627

AD - Department of Psychology, University of Richmond, Virginia 23173

UR - 2056162

ER -

TY - JOUR

ID - 1057

T1 - Determinants of Children's Risk-Taking in Different Social-Situational Contexts: The Role of Cognitions and Emotions in Predicting Children's Decisions

A1 - Morrongiello,Barbara A.

A1 - Matheis,Shawn

Y1 - 2004///

N1 - Last updated - 2012-12-14

SubjectsTermNotLitGenreText - 5183 2877; 4390 7422; 8996; 2177 5127; 1710; 8415; 8094; 1707 6440; 8751 10087 2574 3629 6582; 2653 1710; 3899 8415; 7940 126; 10996 126

KW - ERIC,Current Index to Journals in Education (CIJE)

KW - Travel

KW - Prediction

KW - Context Effect

KW - Play

KW - Injuries

KW - Fear

KW - Decision Making

KW - Cognitive Measurement

KW - Regression (Statistics)

KW - Risk

KW - Cognitive Processes

KW - Psychological Patterns

KW - Goal Orientation

KW - ERIC

RP - NOT IN FILE

SP - 303

EP - 326

JF - Journal of Applied Developmental Psychology

VL - 25

IS - 3

PB - Elsevier. P.O. Box 045, New York, NY 10159-0945.

N2 - This study examined the contribution of cognitive and emotion-based factors in predicting school-age children's risk-taking decisions when the social-situational context did, and did not, pressure for risk-taking. Using drawings of play situations that depicted three possible paths of travel that varied in injury risk and pitted convenience (length of path) against level of risk (e.g., shortest path was most risky), we explored children's appraisals of danger and injury severity (i.e., cognitive measures) and anticipated fear and excitement (i.e., emotion measures) for each possible path of travel. Children also indicated which path they would take and gave a justification for this decision. Subsequently, they were informed of information that threatened loss of a desired goal unless one of the more convenient (faster), risky paths was selected. Children then repeated their path selections and the cognitive and emotion appraisals. When the situation pressured for greater risk-taking to attain a desired goal, children endorsed greater risk-taking the majority of the time, with convenience being the most frequently cited reason for this decision. Regression analyses indicated that both cognitive and emotion-based measures contributed to predict risk-taking decisions in both social-situational contexts. Theoretical and practical implications of these findings are discussed

SN - 0193-3973, 0193-3973

UR - <http://search.proquest.com/docview/62079312?accountid=14701>

ER -

TY - RPRT

ID - 1058

T1 - Interactional Patterns of Schizophrenic, Depressed and Well Mothers and Their Young Children

A1 - Musick, Judith S.

Y1 - 1979/09//

N1 - Availability - Level 1 - Available online, if indexed January 1993 onward

SuppNotes - Paper presented at the Annual Meeting of the American Psychological Association (87th, New York, NY, September 1-5, 1979)

Last updated - 2012-12-14

KW - ERIC,Resources in Education (RIE)

KW - Play

KW - Depression (Psychology)

KW - Mothers

KW - Schizophrenia

KW - Risk  
KW - Rating Scales  
KW - Parent Child Relationship  
KW - Infant Behavior  
KW - Interaction Process Analysis  
KW - Psychopathology  
KW - Preschool Children  
KW - Infants  
KW - ERIC  
RP - NOT IN FILE  
SP - 25

N2 - This study analyzes the interaction patterns and behavioral characteristics of mentally ill and well mothers and their young children. The children were between 1 and 4 years of age. The group of mentally ill mothers was comprised of 18 schizophrenic and psychotically depressed women each with a history of at least one psychiatric hospitalization. The well mothers were matched with two experimental groups (one receiving treatment in the home and the other receiving treatment in a special clinic program) on six variables: age and sex of youngest child, mothers age and marital status, race and socioeconomic status. The data were obtained--prior to intervention--from behavioral analyses of 72 five-minute videotaped sequences of feeding and unstructured play of each mother-child pair. Significant differences between the well and mentally ill mothers were found in only six of the 25 feeding categories and six of the 25 unstructured play categories. Only two of these 12 variables were significant in both feeding and unstructured play: consistency of maternal behavior over 5 minute segment, and amount of contact (touching, holding, gazing). The most significant difference between groups was found on the dyadic variable of reciprocity during feeding. The dyadic interaction of the mentally ill mothers and their children was characterized by fewer attempts by the mother to understand the child or to respond to the child's cues. (Author/SS)

UR - <http://search.proquest.com/docview/63676943?accountid=14701>

ER -

TY - JOUR

ID - 1059

T1 - Language Learning in Context: Teacher and Toddler Speech in Three Classroom Play Areas

A1 - O'Brien, Marion

A1 - Bi, Xiufen

Y1 - 1995///

N1 - Last updated - 2012-12-14

SubjectsTermNotLitGenreText - 694 8016 4542; Child Language 1451 5746; 1571 9146 126; Classroom Communication 1600 1849; 2790; High Risk Students 4723; Language Acquisition 5748 11228 1703 5053 2787; Language Usage 5800; 7940 126; 10527 5127; Teacher Student Relationship 10576 5449 8768; 10883 11655 1474 316 8016 4542

KW - ERIC, Current Index to Journals in Education (CIJE)

KW - Language Usage

KW - At Risk Persons

KW - Toddlers

KW - Teacher Student Relationship

KW - High Risk Students

KW - Teacher Influence

KW - Play

KW - Language Acquisition

KW - Class Activities

KW - Developmental Delays

KW - Classroom Communication

KW - Child Language

KW - ERIC

RP - NOT IN FILE

SP - 148

EP - 163



JF - Topics in Early Childhood Special Education

VL - 15

IS - 2

N2 - Patterns of teacher language used with at-risk toddlers in three different play contexts (doll/house, block/truck, and large motor) were studied within a naturally occurring classroom setting. Significantly different language-use patterns by teachers were found in each area, and these were associated with differences in the rate and nature of child language. (Author/SW)

SN - 0271-1214, 0271-1214

UR - <http://search.proquest.com/docview/62758242?accountid=14701>

ER -

TY - JOUR

ID - 1060

T1 - Specific cross-gender behaviour in boyhood and later homosexual orientation

A1 - Green,R.

A1 - Roberts,C.W.

A1 - Williams,K.

A1 - Goodman,M.

A1 - Mixon,A.

Y1 - 1987/07//

N1 - Green, R. Roberts, C W. Williams, K. Goodman, M. Mixon, A

The British journal of psychiatry : the journal of mental science

0342367, b1k

IM

Journal Article. Research Support, U.S. Gov't, P.H.S.

English

KW - Medline

KW - Rough and Tumble

KW - Child Behavior

KW - Child Development

KW - Gender Identity

KW - Homosexuality

KW - Humans

KW - Identification (Psychology)

KW - Male

KW - Role Playing

RP - NOT IN FILE

SP - 84

EP - 88

JF - British Journal of Psychiatry

JA - Br J Psychiatry

VL - 151

CY - ENGLAND

N2 - Data from a group of males aged 13 to 23, who as children exhibited extensive cross-gender behaviour, was analysed. In boyhood they frequently played with dress-up dolls, role-played as females, dressed in girls' clothes, stated the wish to be girls, primarily had girls as friends, and avoided rough-and-tumble play. The majority of the group evolved a bisexual or homosexual orientation; two types of behaviour, boyhood doll play and female role-playing, were found to be associated with later homosexual orientation. The findings suggest developmental associations between specific types of boyhood cross-gender behaviour and the objects of later sexual arousal

SN - 0007-1250

AD - Department of Psychiatry and Biobehavioral Science, UCLA School of Medicine

UR - 3676630

ER -

TY - GEN

ID - 1061

T1 - Facilitating and Learning at the Edge of Chaos: Expanding the Context of Experiential Education

A1 - Oekerman, Carl

Y1 - 1997/11//

N1 - Availability - Level 1 - Available online, if indexed January 1993 onward

SuppNotes - In: Deeply Rooted, Branching Out, 1972-1997. Annual AEE International Conference

Proceedings; see RC 021 269

Last updated - 2012-12-14

KW - Complex Adaptive Systems

KW - System Dynamics

KW - ERIC, Resources in Education (RIE)

KW - Risk

KW - Play

KW - Systems Approach

KW - Experiential Learning

KW - Group Dynamics

KW - Creativity

KW - Organizational Development

KW - Role of Education

KW - Chaos Theory

KW - Models

KW - ERIC

RP - NOT IN FILE

SP - 7

N2 - Significant recent discoveries within a number of scientific disciplines, collectively referred to as the science of complexity, are creating a major shift in how human beings understand the complex, adaptive systems that make up the world. A complex adaptive system consists of networks of large numbers of agents that interact with each other and with their environment according to a set of rules. This set of rules contains two subsystems: a dominant, or legitimate, subsystem that encompasses the system's primary task, and a recessive, or shadow, subsystem that operates outside of the system's primary task, providing the arena for play, exploration of new behaviors, and creativity. The shadow subsystem also seeks to undermine or modify the dominant subsystem through change. These two subsystems coexist in dynamic tension, and when the system is operating in the narrow zone between order and chaos, called a phase transition, or "the edge of chaos," it is operating at its highest level of functioning. Here is where the system creates space for novelty, where the greatest information processing takes place, where risks are taken and new behavior is tried out. Five factors that determine whether a system can move into the edge of chaos are identified. Practitioners of experiential education, working with and within complex human systems, already intuitively understand many aspects of complex system dynamics, and are ideally suited to use their skills in broader applications. Organizations and institutions shifting to the new paradigm of complex systems will operate from a conceptual framework with which experiential educators are already skilled. Includes suggestions for further reading. (Author/TD)

UR - <http://search.proquest.com/docview/62529490?accountid=14701>

ER -

TY - JOUR

ID - 1062

T1 - Women's Refuges as Intervention Arenas for Children Who Experience Domestic Violence

A1 - Overlien, Carolina

Y1 - 2011///

N1 - Last updated - 2012-12-14

SubjectsTermNotLitGenreText - 5470; 3862 11282 545 9738 909; 3932 8016 4542; 4109 4335; 1474 316 8016 4542; 694 8016 4542; 916 8234; 3387 6531 2877; 2900 10157 3629 6582; 3378 4878 3760; 7940 126; 1443 5053 2787; 2291 4552; 3592 7807 4918 5964; 5472 3629 6582

KW - Norway

KW - ERIC, Current Index to Journals in Education (CIJE)

KW - At Risk Persons

KW - Play

KW - Intervention  
KW - Emergency Shelters  
KW - Counseling  
KW - CHILDREN  
KW - Behavior Problems  
KW - Discourse Analysis  
KW - Emotional Disturbances  
KW - Foreign Countries  
KW - Ethics  
KW - Child Development  
KW - Family Violence  
KW - Interviews  
KW - Females  
KW - ERIC  
RP - NOT IN FILE  
SP - 375  
EP - 391  
JF - Child Care in Practice  
VL - 17  
IS - 4

PB - Routledge. , 325 Chestnut Street Suite 800, Philadelphia, PA 19106.

N2 - For over 30 years, children have been accompanying their mothers to women's refuges. We now know that these children are at risk of developing an array of behavioural and psychological difficulties. We also know the importance for children of keeping active and playing while at the refuge, and to be given the possibility of addressing and dealing with their own experiences of violence. However, we know very little about how children experience these interventions. This study analyses children's discourse about their everyday lives at refuges in Norway. The questions asked are: what interventions do children in refuges in Norway receive and how do the children experience those interventions? The analysis shows that the children focus on two forms of interventions as particularly helpful, activities (trips, "outings", and so on) and individual counselling. Furthermore, as the most important intervention for a child who experiences domestic violence is to remove him/her from a seriously violent environment, the refuge stay in itself can be perceived as an intervention. In the discussion, the author describes how and why refuges represent a unique opportunity for interventions with children. (Contains 4 notes.)

SN - 1357-5279, 1357-5279

UR - <http://search.proquest.com/docview/964180715?accountid=14701>

ER -

TY - JOUR

ID - 1063

T1 - Sex-typing behavior and sex-typing pressure in child/parent interaction

A1 - Jacklin,C.N.

A1 - DiPietro,J.A.

A1 - Maccoby,E.E.

Y1 - 1984/10//

N1 - Jacklin, C N. DiPietro, J A. Maccoby, E E

Archives of sexual behavior

8gr, 1273516

IM

Journal Article

English

KW - Medline

KW - Rough and Tumble

KW - Child

KW - Preschool

KW - Father-Child Relations

KW - Female

KW - Gender Identity

KW - Humans

KW - Identification (Psychology)

KW - Male

KW - Mother-Child Relations

KW - Parent-Child Relations

KW - Play and Playthings

KW - Sex Factors

KW - SOCIALIZATION

RP - NOT IN FILE

SP - 413

EP - 425

JF - Archives of Sexual Behavior

JA - Arch.Sex Behav

VL - 13

IS - 5

CY - UNITED STATES

N2 - The sex-typing of children and the sex-typing pressure of parents was investigated during free play in a home visit. There were 30 male and 24 female 45-month-olds observed with their mothers and fathers in separate free-play sessions during which an array of both sex-stereotyped and neutral toys were available. Behavioral observations were recorded for a variety of parent, child, and dyadic behaviors, including initiations of sex-typed play, total sex-typed play, and rough-and-tumble play. Children initiated sex-typed play and played with sex-appropriate toys. Father-child and mother-daughter dyads were more likely to engage in thematic play appropriate to the child's sex, while in mother-son dyads equal amounts of masculine and feminine play occurred. In addition father-son dyads displayed the highest levels of rough-and-tumble play and arousal of child by parent. The results suggest that fathers are the discriminating influence on sex-appropriate play

SN - 0004-0002

UR - 6517683

ER -

TY - JOUR

ID - 1064

T1 - Politics and Play: Meditations on Rhetorical Bodily Performance

A1 - Pauliny, Tara

Y1 - 2013///

N1 - Last updated - 2013-07-02

SubjectsTermNotLitGenreText - 10820 4007 4918 5964; 4890; 7147 1849; 9588; 8009 2503; 7989; 7940 126; 4960; 6867; 3933; 6355; 2471 3518; 9769 5127; 694 8016 4542

KW - Ohio

KW - United States

KW - ERIC,Current Index to Journals in Education (CIJE)

KW - Adult Education

KW - Masculinity

KW - At Risk Persons

KW - Social Influences

KW - Cultural Context

KW - Play

KW - Popular Culture

KW - Sexual Identity

KW - Nonverbal Communication

KW - Human Body

KW - Theater Arts

KW - Ideology

KW - Multimedia Materials

KW - Political Power

KW - Femininity

KW - ERIC

RP - NOT IN FILE

SP - 179

EP - 191

JF - Research in Drama Education

VL - 18

IS - 2

PB - Routledge. , 325 Chestnut Street Suite 800, Philadelphia, PA 19106.

N2 - Focusing on the drag king performances of Christie Whisman, who lived and worked in Columbus, Ohio, USA, from 1999 to 2001, this essay argues that rhetorical bodily performances have the capacity not only to subvert normalised notions of identity categories, but that such performances can also create alternate pedagogical sites that persuasively and parodically connect politics to play. By exposing the interconnected nature of the material and theoretical body--the body constructed by physicality, and the body constructed through ideology--Whisman's work expands and deconstructs social categorisations that have material and psychic impact. It calls into question what constitutes masculinity and femininity, for example, and it provides an opportunity for the subject to answer back and have a hand in her own construction. By forwarding a political critique that highlights the symbiotic relationship between the body and identity, parody and persuasion, and subversion and reiteration, this essay argues that Whisman's work illustrates the political power of play. It notes that, while her performances remind us that categories of the body such as gender and even sex are certainly constructed and performed, the persuasive force of those performances is often attached to, in fact "performed by", an actual body. Her work asserts that it is this body--this flesh and blood, imagined and imagining, limited and possible--that intersects with actions and speech to create rhetorical and queer arguments; here, bodily matter brims with signification, resistance and, perhaps above all, subversive potential. In so doing, the arguments offered by rhetorical bodily performances often cross lines of race and class (given the spaces in which they are performed), subvert gender binaries, refuse to honour the artificial separation of politics and pop culture, and ultimately authorise the performing subject and her audience. (Contains 5 notes.)

SN - 1356-9783, 1356-9783

UR - <http://search.proquest.com/docview/1373089187?accountid=14701>

ER -

TY - JOUR

ID - 1065

T1 - An analysis and reduction of disruptive behavior on school buses

A1 - Greene,B.F.

A1 - Bailey,J.S.

A1 - Barber,F.

Y1 - 1981///

N1 - Greene, B F. Bailey, J S. Barber, F

Journal of applied behavior analysis

0174763, hdr

IM

Journal Article

English

KW - Medline

KW - Rough and Tumble

KW - Adolescent

KW - Behavior Therapy/mt [Methods]

KW - Child

KW - Child Behavior Disorders/rh [Rehabilitation]

KW - Feedback

KW - Florida

KW - Humans

KW - Motor Activity

KW - Noise/pc [Prevention &amp; Control]

KW - Transportation

RP - NOT IN FILE

SP - 177

EP - 192

JF - Journal of Applied Behavior Analysis

JA - J Appl. Behav Anal.

VL - 14

IS - 2

CY - UNITED STATES

N2 - Thousands of children are injured or killed each year in school bus accidents. A significant number of these tragic incidents is precipitated by disruptive child behavior that distracts the drivers from their difficult task. Two experiments were conducted which addressed this problem. For both experiments an automated sound recording device (referred to as a Noise Guard) selectively responsive to frequencies above 500 Hz (i.e., unresponsive to bus drone) recorded both the duration and frequency of noise outbursts above a tolerable threshold. Additionally, an observer made in situ measurements of other disruptions including roughhousing and getting-out-of-seat. In the first experiment, following baseline measurements of these behaviors, middle-school students received feedback for noise outbursts. That is, when "Noise Guard" was activated, it in turn operated one of several lights on a panel visible to all passengers. Each day students were allowed to listen to high-appeal taped music while riding the bus and to participate in a raffle for prizes, provided the number of outbursts on the preceding day remained below a specified criterion indicated on the light panel. This intervention resulted in drastic reductions of noise outbursts with a concomitant reduction in other disruptive behaviors. Comparable results were obtained in the second experiment which eliminated the raffle from the intervention

SN - 0021-8855

UR - 7287600

ER -

TY - JOUR

ID - 1066

T1 - An Intervention to Promote Social Emotional School Readiness in Foster Children: Preliminary Outcomes from a Pilot Study

A1 - Pears, Katherine C.

A1 - Fisher, Philip A.

A1 - Bronz, Kimberly D.

Y1 - 2007///

N1 - Last updated - 2012-12-14

SubjectsTermNotLitGenreText - 9261 8620; 8658 8620; 5470; 5446 1970 1; 4151 9806 4911 9556; 3386 5053 2787; 4723; 8168; 8301 3626; 9457 909; 715; 1955 3629 6582; 7941 10836 10839 8699; 7455

KW - ERIC, Current Index to Journals in Education (CIJE)

KW - High Risk Students

KW - Intervention

KW - Attendance

KW - Foster Care

KW - Outcomes of Treatment

KW - Emotional Development

KW - Play Therapy

KW - Comparative Analysis

KW - Prevention

KW - Interpersonal Competence

KW - Reading Readiness

KW - Program Evaluation

KW - Self Control

KW - School Readiness

KW - ERIC

RP - NOT IN FILE

SP - 665

EP - 673

JF - School Psychology Review

VL - 36

IS - 4

PB - National Association of School Psychologists. 4340 East West Highway Suite 402, Bethesda, MD 20814.

N2 - Foster children are at great risk for poor school outcomes. Given that school readiness is a powerful predictor of later school success, the promotion of school readiness skills in foster children is an opportunity for preventive intervention. Results are presented from a preliminary evaluation of a program designed to improve school readiness in foster children. Twenty-four foster children were randomly assigned to the intervention or comparison conditions. The intervention consisted of therapeutic playgroups (twice weekly for 7 weeks during the summer) focusing on social competence and self-regulation skills. Attendance rates for the playgroups are reported. In addition, group differences on data collected before and after the intervention are reported.

Intervention group children exhibited increased social competence and self-regulation. Comparison group children exhibited poorer performance in these domains over time. Results are discussed in terms of how the study has informed a current randomized efficacy trial of a school-readiness intervention. (Contains 1 table.)

SN - 0279-6015, 0279-6015

UR - <http://search.proquest.com/docview/61947745?accountid=14701>

ER -

TY - JOUR

ID - 1067

T1 - Risky Business: Making Inferences about Risk and Its Value. Book Review

A1 - Pellegrini, Anthony D.

Y1 - 1999///

N1 - SuppNotes - Reviews "Risk and Our Pedagogical Relation to Children: On the Playground and Beyond," by Stephen J. Smith

Last updated - 2012-12-14

SubjectsTermNotLitGenreText - 1108 8477; 1472 5058 6996; 1474 316 8016 4542; Play 7940 126;

Playgrounds 7943 8704 3760; 8854 6996; Risk 8996

KW - ERIC, Current Index to Journals in Education (CIJE)

KW - Risk

KW - Book Reviews

KW - Play

KW - Research Needs

KW - Playgrounds

KW - Childhood Needs

KW - CHILDREN

KW - ERIC

RP - NOT IN FILE

SP - 435

EP - 438

JF - Early Childhood Research Quarterly

VL - 14

IS - 3

N2 - Evaluates the extent to which Smith's work adds to the theoretical and evidentiary basis for the role of playgrounds in children's education and development. Finds the basic construct of "risk" as presented in the book to be unfocused, and suggests that to make inferences from the work about the value of risk for children is premature. (HTH)

SN - 0885-2006, 0885-2006

UR - <http://search.proquest.com/docview/62249384?accountid=14701>

ER -

TY - RPRT

ID - 1068

T1 - Developmental and Clinical Aspects of Young Children's Play. WESTAR Series Paper #17

A1 - Pelz, Ruth

Y1 - 1982/10//

N1 - Availability - Level 1 - Available online, if indexed January 1993 onward

SuppNotes - Papers presented at a Symposium sponsored by The Playschool, a HCEEP model demonstration

program (Denver, CO, May 7-8, 1982)

Last updated - 2012-12-14

KW - ERIC,Resources in Education (RIE)

KW - Symbolic Learning

KW - Play

KW - Cognitive Development

KW - Young Children

KW - High Risk Persons

KW - Psychotherapy

KW - Disabilities

KW - Theories

KW - Child Development

KW - Infants

KW - ERIC

RP - NOT IN FILE

SP - 66

N2 - Five papers are presented from a 1982 conference on "Developmental and Clinical Aspects of Young Children's Play." In the first paper ("Cognitive Characteristics of Young Children's Play,") S. Rogers summarizes J. Piaget's theories on developmental stages, discusses the relationship of practice play to learning, and then focuses on the role of symbolic play, with special emphasis on research regarding play of handicapped children. D. Wolf ("Play as a Mirror for Development") considers play as a reflection of the child's development, symbolic growth, and social understanding; and as an indicator of individual differences. G. Farley examines "The Use of Play in Child Psychotherapy with Severely Emotionally Disturbed Preschoolers." I. Bretherton et al. focus on group and individual differences in child's play ("The Effect of Contextual Variation on Symbolic Play: Development from 20 to 28 Months"). In the final paper, "Development of Free Play Behavior in Infancy," R. Harmon and A. Glicken review studies on the free play behavior in normal, abused/neglected, and premature infants 12-18 months old. (CL)

UR - <http://search.proquest.com/docview/63494453?accountid=14701>

ER -

TY - JOUR

ID - 1069

T1 - Preschool Teachers' Fidelity in Implementing a Comprehensive Language-Rich Curriculum

A1 - Pence,Khara L.

A1 - Justice,Laura M.

A1 - Wiggins,Alice K.

Y1 - 2008/07//

N1 - Last updated - 2012-12-14

SubjectsTermNotLitGenreText - 5800; 3005 9021 9651 6582; 8127 11655 1474 316 8016 4542; 9974 7637 6506 10669; 8135 10591 8267 3417 8016 4542 5703 4908 8917; 10621 3227 6582; 694 8016 4542; 4723

KW - ERIC,Current Index to Journals in Education (CIJE)

KW - Practitioners

KW - Preschool Teachers

KW - Language Usage

KW - At Risk Persons

KW - High Risk Students

KW - Speech Language Pathology

KW - Dramatic Play

KW - Preschool Children

KW - Teaching Methods

KW - ERIC

RP - NOT IN FILE

SP - 329

EP - 341

JF - Language, Speech, and Hearing Services in Schools

VL - 39



IS - 3

PB - American Speech-Language-Hearing Association (ASHA). 10801 Rockville Pike, Rockville, MD 20852.

N2 - Purpose: This study examined preschool teachers' fidelity to the language-focused curriculum (LFC; B. Bunce, 1995), a comprehensive classroom curriculum designed to improve at-risk children's language outcomes through targeted improvements to a classroom's activity contexts (e.g., dramatic play, art, storybook reading) and instructional processes (e.g., teacher use of open-ended questions, recasts, and expansions). Specific aims included to (a) examine program differentiation by determining how measures of activity contexts and instructional processes differentiated treatment and comparison teachers, (b) determine treatment teachers' adherence to both activity contexts and instructional processes over an entire academic year, and (c) determine treatment teachers' reported quality of program delivery and comfort with curriculum implementation. Method: Fourteen preschool teachers were randomly assigned to implement the LFC or to maintain their prevailing curriculum. Fidelity was measured 3 times over an academic year using a curriculum fidelity checklist. Results: LFC teachers exhibited fidelity to activity contexts more readily than to instructional processes. Teacher use of language-focused instructional processes was relatively low even after a year of LFC implementation. Conclusion: This study supports the need for speech-language pathologists to work closely with preschool educators to implement the activity contexts and instructional processes associated with high-quality preschool language-learning environments

SN - 0161-1461, 0161-1461

UR - <http://search.proquest.com/docview/61994339?accountid=14701>

ER -

TY - JOUR

ID - 1070

T1 - The Development of Effortful Control in Children Born Preterm

A1 - Poehlmann,Julie

A1 - Schwichtenberg,J.A.

A1 - Shah,Prachi E.

A1 - Shlafer,Rebecca J.

A1 - Hahn,Emily

A1 - Maleck,Sarah

Y1 - 2010///

N1 - Last updated - 2012-12-14

SubjectsTermNotLitGenreText - 6175 1326 3629 6582 8836; 5118 11655 1474 316 8016 4542; 10883 11655 1474 316 8016 4542; 9457 909; 8105; 8996; 2746 8415; 1703 5053 2787; 8112 5118 11655 1474 316 8016 4542; 7940 126; 7537 3851 5449 8768; 8415; 6823 3932 8016 4542 7577 3816; 724 2877; 1701 1; 3821; 4634

KW - ERIC,Current Index to Journals in Education (CIJE)

KW - Family Characteristics

KW - Toddlers

KW - Play

KW - Cognitive Development

KW - Depression (Psychology)

KW - Mothers

KW - Health

KW - Longitudinal Studies

KW - Pregnancy

KW - Risk

KW - Cognitive Ability

KW - Psychological Patterns

KW - Parent Child Relationship

KW - Premature Infants

KW - Attention Deficit Disorders

KW - Self Control

KW - Infants

KW - ERIC

RP - NOT IN FILE

SP - 522

EP - 536

JF - Journal of Clinical Child and Adolescent Psychology

VL - 39

IS - 4

PB - Routledge, 325 Chestnut Street Suite 800, Philadelphia, PA 19106.

N2 - This prospective longitudinal study examined emerging effortful control skills at 24- and 36-months postterm in 172 children born preterm (less than 36 weeks gestation). Infant (neonatal health risks), family (sociodemographic risks), and maternal risk factors (depressive symptoms, anger expressions during play interactions) were assessed at six time points across 3 years. In addition, children's emerging effortful control skills, cognitive development, and mother-reported behavior and attention problems were assessed at 24 and 36 months. Analyses documented links between effortful control skills, cognitive skills, and concurrent attention problems in children born preterm. The study also found that preterm children's effortful control skills improved over time. In addition, neonatal health risks, family sociodemographic risks, and angry parenting interactions were associated with less optimal effortful control skills. (Contains 2 tables and 1 figure.)

SN - 1537-4416, 1537-4416

UR - <http://search.proquest.com/docview/754908508?accountid=14701>

ER -

TY - JOUR

ID - 1071

T1 - Infant Physiological Regulation and Maternal Risks as Predictors of Dyadic Interaction Trajectories in Families with a Preterm Infant

A1 - Poehlmann,Julie

A1 - Schwichtenberg,J.A.

A1 - Bolt,Daniel M.

A1 - Hane,Amanda

A1 - Burnson,Cynthia

A1 - Winters,Jill

Y1 - 2011/01//

N1 - Last updated - 2012-12-14

SubjectsTermNotLitGenreText - 6562; 6823 3932 8016 4542 7577 3816; 8112 5118 11655 1474 316 8016 4542; 11655 1474 316 8016 4542; 8996; 9753 5053 2787; 5446 1970 1; 7888 994 6976 9351 5964; 4858 5241; 9835 10103; 7537 3851 5449 8768; 7940 126; 722; 8099; 6175 1326 3629 6582 8836

KW - ERIC,Current Index to Journals in Education (CIJE)

KW - Play

KW - Young Children

KW - Socioeconomic Status

KW - Mothers

KW - Physiology

KW - Longitudinal Studies

KW - Risk

KW - Interpersonal Competence

KW - Parent Child Relationship

KW - Premature Infants

KW - Social Development

KW - Attention

KW - Metabolism

KW - Predictor Variables

KW - Hospitals

KW - ERIC

RP - NOT IN FILE

SP - 91

EP - 105

JF - Developmental Psychology

JA - Dev.Psychol.

VL - 47

IS - 1

PB - American Psychological Association. Journals Department, 750 First Street NE, Washington, DC 20002-4242.

N2 - This longitudinal study examined predictors of rates of growth in dyadic interaction quality in children born preterm who did not experience significant neurological findings during neonatal intensive care unit (NICU) hospitalization. Multiple methods were used to collect data from 120 preterm infants (48% girls, 52% boys) and their mothers. Infant heart rate variability (HRV), gestational age, neonatal health, feeding route, and maternal socioeconomic (SES) risks were assessed at NICU discharge (mean of 36 weeks postconception). Mother-child interactions were observed at 4, 9, 16, and 24 months postterm and analyzed with hierarchical linear modeling. On average, children's quality of play, interest, and attention increased over time while their dysregulation and irritability decreased, whereas average maternal positive affect and involvement declined in quality (ps less than 0.05), although there was individual variation in rates of change. Mothers of infants with higher postfeeding HRV (i.e., vagal regulation) exhibited less decrease in positive affect and involvement between 4 months and 24 months, compared with mothers of infants with lower HRV (p less than 0.05). Although infants with higher postfeeding HRV showed less positive affect and communication at 4 months, they exhibited significantly greater increases in positive affect and social competence and decreases in dysregulation and irritability between 4 months and 24 months, compared with infants with lower HRV (ps less than 0.05). Dyads experiencing more SES risks showed less optimal interactions at 4 months; this difference remained as children grew older (ps less than 0.05). Results have implications for our understanding of social development in preterm infants. (Contains 2 footnotes, 6 tables, and 1 figure.)

SN - 0012-1649, 0012-1649

UR - <http://search.proquest.com/docview/854552974?accountid=14701>

ER -

TY - JOUR

ID - 1072

T1 - Effects of combat on a delinquent boy

A1 - Miller, Milton L.

Y1 - 1948///

N1 - Peer Reviewed Journal: 2013-38237-016

English

Journal; Peer Reviewed Journal

KW - PsycInfo

KW - Rough and Tumble

KW - Combat Experience

KW - Juvenile Delinquency

KW - Friendship

KW - Homosexuality

KW - Anxiety Sensitivity

RP - NOT IN FILE

SP - Apr

EP - 339

JF - American Journal of Orthopsychiatry

JA - Am J Orthopsychiatry

VL - .18

IS - 2

N2 - This article discusses the effects of combat on a delinquent boy, Nick. Nick, a gunner who was suffering from severe anxiety reactions, was seen at a convalescent center. From age seven to sixteen he had been the leader of a boys' gang, and at one time had spent a year in a reformatory for stealing. On release he went to work, his delinquent activities ceased, and he married happily. Nick served as a gunner on a Flying Fortress and went through many harrowing experiences. He returned wearing several rows of decorations, a national hero, with his picture in the newspapers but was in a state of severe depression. Now, in the convalescent hospital, his attitude toward those who tried to help him was defiant and belligerent. His relationship with the men overseas had been very warm and friendly just as with members of the gang he formerly led. At the same time his relationship with the boys was tinged with sublimated homosexuality-close friendships with much kidding, cajoling, and horseplay. He came to the psychiatrist's office for his second interview drinking a glass of milk

and began spontaneously to talk about his lost buddies. During a session under sodium pentothal sedation, Nick talked about some of the worst combat scenes. His attitude of great faithfulness toward his friends was outstanding, as was also his preoccupation with death. When this patient saw the reality of unleashed hostility in war, his own hostility was mobilized, he was terrified, torn between hostility and extreme guilt and self-destructive drives. (PsycINFO Database Record (c) 2013 APA, all rights reserved)

SN - 0002-9432

ER -

TY - RPRT

ID - 1073

T1 - Child-Centered Play Therapy: Working with At-Risk Youth in the Elementary School Setting

A1 - Post,Phyllis

A1 - Stopanio,Joe

A1 - Fielden,Ashley

Y1 - 1998///

N1 - Availability - Level 1 - Available online, if indexed January 1993 onward

Last updated - 2012-12-14

KW - ERIC,Resources in Education (RIE)

KW - Higher Education

KW - Intermediate Grades

KW - Play Therapy

KW - High Risk Students

KW - Graduate Students

KW - Elementary School Students

KW - Counselor Training

KW - ERIC

RP - NOT IN FILE

SP - 13

N2 - This paper details a project in which a counselor educator and 12 counseling graduate students, trained in child-centered play therapy, worked in an inner city school with 4th-6th grade students during the 1996-1997 academic year. The play therapy training undergone by the graduate students and the facility used for the therapy sessions are described. The paper presents issues in establishing the program. The following conclusions were drawn from the year-long experience: (1) working with at-risk children has the obvious advantage of access to the children, because they are in school for many days making it possible for counselors to reach children who would not attend counseling outside school; (2) play did seem to be an effective approach with these older at-risk children; (3) most of the children demonstrated interest in exploring a variety of the toys; and (4) child-centered play therapy was well accepted by these students. Communication with administrators, teachers and parents to help them understand more about play therapy and its value is essential; privacy is critical; and because the word "play" created difficulties, using the words "counseling" or "developmental counseling" may make the sessions seem more important to others. (MKA)

UR - <http://search.proquest.com/docview/62542025?accountid=14701>

ER -

TY - JOUR

ID - 1074

T1 - Strengthening Play through Father Involvement

A1 - Pruett,Kyle

Y1 - 2009/09//

N1 - Last updated - 2012-12-14

SubjectsTermNotLitGenreText - 7940 126; 11655 1474 316 8016 4542; 3896 7577 3816 8016 4542 6265; 7537 3851 5449 8768; 1443 5053 2787; 694 8016 4542; 3851 5449 8768

KW - ERIC,Current Index to Journals in Education (CIJE)

KW - Early Childhood Education

KW - At Risk Persons

KW - Play

KW - Young Children

KW - Parent Child Relationship  
KW - Child Development  
KW - Family Relationship  
KW - Fathers  
KW - ERIC  
RP - NOT IN FILE  
SP - 40  
EP - 41  
JA - Zero to Three  
VL - 30  
IS - 1  
PB - Zero to Three. 2000 M Street NW Suite 200, Washington, DC 20036-3307.  
N2 - In his essay exploring the latest research finding on the importance of men in the lives of young children, the author describes two ongoing empirical studies that are proving particularly instructive in understanding the significance of paternal contributions to improving young child outcomes. Both projects are encouraging direct paternal play engagement in at-risk populations and discovering positive outcomes for families  
SN - 0736-8038, 0736-8038  
UR - <http://search.proquest.com/docview/61822285?accountid=14701>  
ER -  
  
TY - JOUR  
ID - 1075  
T1 - Changing Antisocial Behavior Patterns in Young Boys: A Structured Cooperative Learning Approach  
A1 - Quinn,Mary Magee  
Y1 - 2002///  
N1 - SuppNotes - Special Issue: Severe Behavior Disorders of Children and Youth  
Last updated - 2012-12-14  
SubjectsTermNotLitGenreText - 28 96; 545 9738 909; Behavior Disorders 913 2877; Behavior Modification 914 2094; Cooperative Learning 2225 5882; 3352 3368 3150; 4413 5264; 4723; 5248; 6265 8016 4542; Peer Teaching 7678 10621 3227 6582; 7940 126; 7943 8704 3760; Prevention 8168; 9753 5053 2787; 10867  
KW - ERIC,Current Index to Journals in Education (CIJE)  
KW - Elementary Education  
KW - Grade 1  
KW - Instructional Effectiveness  
KW - High Risk Students  
KW - Play  
KW - Cooperative Learning  
KW - MALES  
KW - Peer Teaching  
KW - Academic Achievement  
KW - Antisocial Behavior  
KW - Prevention  
KW - Behavior Disorders  
KW - Playgrounds  
KW - Behavior Modification  
KW - Social Development  
KW - Time on Task  
KW - ERIC  
RP - NOT IN FILE  
SP - 380  
EP - 395  
JF - Education and Treatment of Children  
VL - 25  
IS - 4  
N2 - A six-week cooperative learning intervention using positive peer role models was used to teach interpersonal problem-solving skills to 42 first-grade boys at risk of antisocial behavior patterns. Participants

showed an increase in academic engaged time. However, the intervention failed to produce significantly lower rates of externalizing antisocial behaviors or negative playground interactions. (Contains references.)

(Author/CR)

SN - 0748-8491, 0748-8491

UR - <http://search.proquest.com/docview/62215046?accountid=14701>

ER -

TY - JOUR

ID - 1076

T1 - Two Counseling Interventions to Reduce Teacher-Child Relationship Stress

A1 - Ray, Dee C.

Y1 - 2007/04//

N1 - Last updated - 2012-12-14

SubjectsTermNotLitGenreText - 3363 10278 8016 4542; 8127 11655 1474 316 8016 4542; 3366 9306 5241; 4723; 10197 2472 2842 10187; 7455; 2293; 10239 8234; 9195 9224 4552 2291; 7941 10836 10839 8699; 3281 10087 2574 3629 6582; 10482 730; 2302 6582; 10576 5449 8768; 2159 9945 8016 4542; 5051; 10151

KW - ERIC, Current Index to Journals in Education (CIJE)

KW - Counselors

KW - Elementary Education

KW - Teacher Student Relationship

KW - High Risk Students

KW - Elementary School Students

KW - Consultants

KW - Individual Characteristics

KW - Teacher Attitudes

KW - Student Diversity

KW - Stress Management

KW - Outcomes of Treatment

KW - Play Therapy

KW - Counseling Techniques

KW - Counseling Effectiveness

KW - Student Problems

KW - Preschool Children

KW - School Counseling

KW - Effect Size

KW - Elementary Schools

KW - ERIC

RP - NOT IN FILE

SP - 428

EP - 440

JF - Professional School Counseling

VL - 10

IS - 4

PB - American School Counselor Association. 1101 King Street Suite 625, Alexandria, VA 22314.

N2 - This article discusses a study investigating the impact of two school counseling interventions, child-centered play therapy (CCPT) and teacher consultation, on teacher-child relationship stress. CCPT and teacher consultation were conducted with 93 (pre-kindergarten to fifth grade) elementary school students across three elementary schools deemed to be at risk and ethnically diverse. Students were divided into three treatment groups: CCPT only, teacher consultation only, and a combined CCPT and teacher consultation group. Results demonstrated significant differences between pretesting and posttesting on the Index of Teaching Stress. All treatment groups were found to have statistically significant reduction in teacher and student problem characteristics with large effect sizes for total stress. (Contains 2 tables and 1 figure.)

SN - 1096-2409, 1096-2409

UR - <http://search.proquest.com/docview/62038076?accountid=14701>

ER -

TY - JOUR

ID - 1077

T1 - Gutter to Garden: Historical Discourses of Risk in Interventions in Working Class Children's Street Play

A1 - Read, Jane

Y1 - 2011/11//

N1 - Last updated - 2012-12-14

SubjectsTermNotLitGenreText - 11581 9744 8016 4542; 7940 126; 3085 3150; 1485; 2492 2472 2842; 5470; 4109 4335; 5649 5264; 694 8016 4542; 8462 7970; 125 9738 909; 11162 4335; 5015; 1541 10103

KW - United Kingdom

KW - ERIC, Current Index to Journals in Education (CIJE)

KW - Kindergarten

KW - At Risk Persons

KW - Cultural Pluralism

KW - Citizenship

KW - Play

KW - Intervention

KW - Early Childhood Education

KW - Public Policy

KW - Working Class

KW - Foreign Countries

KW - Urban Areas

KW - Inclusion

KW - Children's Rights

KW - Activism

KW - ERIC

RP - NOT IN FILE

SP - 421

EP - 434

JF - Children & Society

VL - 25

IS - 6

PB - Wiley-Blackwell. 350 Main Street, Malden, MA 02148.

N2 - This article investigates interventions in the gutter play of British working class children in the first decade of the 20th century through their re-location within Free Kindergartens. In contemporary literature, the street child was viewed through a binary lens, as both "at risk" and "as risk", reflecting wider societal discourses in a period of rapidly developing social policy. The paper interrogates the motivations of free kindergarten activists from the standpoint of a range of theory and builds on recent papers discussing 21st century urban childhoods. The findings suggest both historical continuities and discontinuities in the theorisation of risk, which have implications for current social policy, urban design and early childhood education. The questions raised include issues of children's rights, citizenship, inclusion and cultural diversity

SN - 0951-0605, 0951-0605

UR - <http://search.proquest.com/docview/964171426?accountid=14701>

ER -

TY - JOUR

ID - 1078

T1 - Effects of Modern Educational Game Play on Attitudes towards Mathematics, Mathematics Self-Efficacy, and Mathematics Achievement

A1 - Ritzhaupt, Albert

A1 - Higgins, Heidi

A1 - Allred, Beth

Y1 - 2011///

N1 - Last updated - 2012-12-14

SubjectsTermNotLitGenreText - 6644 10278 8016 4542; 7940 126; 3132 10103; 10181 730; 3206 4270 126; 9466 9469 9451; 6411 96; 2074 2073 10675; 2328 4335; 10759 6388 2787; 4290; 8550 2842; 3268 10669; 695 694 8016 4542; 727 1387; 76; 11255 4270 126

KW - United States (Southeast)  
KW - Elementary Secondary Education Act Title I  
KW - ERIC,Current Index to Journals in Education (CIJE)  
KW - Middle Schools  
KW - Video Games  
KW - Play  
KW - Gender Differences  
KW - Mathematics Achievement  
KW - Middle School Students  
KW - Counties  
KW - Racial Differences  
KW - Attitude Change  
KW - Computer Uses in Education  
KW - At Risk Students  
KW - Student Attitudes  
KW - Educational Games  
KW - Access to Computers  
KW - Self Efficacy  
KW - Economic Status  
KW - Educational Technology  
KW - Test Construction  
KW - ERIC  
RP - NOT IN FILE  
SP - 277  
EP - 297  
JF - Journal of Interactive Learning Research  
VL - 22  
IS - 2  
PB - Association for the Advancement of Computing in Education. P.O. Box 1545, Chesapeake, VA 23327-1545.  
N2 - This study investigated the effects of modern educational game playing on middle school students' attitudes towards mathematics, mathematics self-efficacy, and mathematics achievement. Two hundred twenty-five middle school students from four different Title 1 schools in two different counties in the southeastern United States were recruited. Students participated in a quasi-experimental pre-test and post-test design with 16-weeks of the game intervention and a minimum of one session of game play per week. The students' gender, socio-economic status (SES), ethnicity, frequency of game play, and frequency of computer use were examined as moderating variables and covariates. ANCOVA detected significant and positive changes in students' attitudes towards mathematics and mathematics self-efficacy. However, there was no significant change in students' mathematics achievement. A students' gender, SES, and frequency of computer use did not significantly interact with any of the criterion measures. Discussion and recommendations for future research are provided. (Contains 5 tables and 1 figure.)  
SN - 1093-023X, 1093-023X  
UR - <http://search.proquest.com/docview/898323364?accountid=14701>  
ER -  
  
TY - JOUR  
ID - 1079  
T1 - What Play Therapists Do within the Therapeutic Relationship of Humanistic/Non-Directive Play Therapy  
A1 - Robinson,Sally  
Y1 - 2011///  
N1 - Last updated - 2012-12-14  
SubjectsTermNotLitGenreText - 4109 4335; 7941 10836 10839 8699; 415 4657 3417 8016 4542 5703 4908 8917; 9015; 694 8016 4542; 10834 3518; 3387 6531 2877; 8415; 11465 8522; 2310 5449 8768; 11227 1849; 3400 8415; 636 10839; 9473; 3363 10278 8016 4542  
KW - ERIC,Current Index to Journals in Education (CIJE)  
KW - Elementary Education



KW - At Risk Persons  
KW - Allied Health Personnel  
KW - Elementary School Students  
KW - Counselor Client Relationship  
KW - Well Being  
KW - Emotional Disturbances  
KW - Play Therapy  
KW - Verbal Communication  
KW - Foreign Countries  
KW - Psychological Patterns  
KW - Art Therapy  
KW - Role  
KW - Self Expression  
KW - Empathy  
KW - Therapeutic Environment  
KW - ERIC  
RP - NOT IN FILE  
SP - 207  
EP - 220  
JF - Pastoral Care in Education  
VL - 29  
IS - 3  
PB - Routledge. , 325 Chestnut Street Suite 800, Philadelphia, PA 19106.  
N2 - Play therapists are increasingly being employed in schools, yet there is confusion among many health, education and social care practitioners about the role of play therapists. This paper explains how play therapists position themselves and what they do through an examination of the therapeutic relationship between the therapist and child. It discusses the core conditions of congruence, acceptance and empathy with reference to recent research. Play therapists vary their practice in terms of verbal or non-verbal interaction, the tools in their playroom and how they physically place themselves. This paper argues for placing an emphasis on the non-verbal mirroring of the child, the incorporation of expressive media such as paint, clay and sand into the play room and the positioning of the therapist within the play space  
SN - 0264-3944, 0264-3944  
UR - <http://search.proquest.com/docview/964173714?accountid=14701>  
ER -  
  
TY - JOUR  
ID - 1080  
T1 - Bullying and coercion: School-based cognitive-behavioral interventions. [References]  
A1 - Doll,Beth  
Y1 - 2012///  
N1 - Book: 2012-04950-012  
English  
Book; Edited Book  
KW - PsycInfo  
KW - Rough and Tumble  
KW - Aggressive Behavior  
KW - Cognitive Behavior Therapy  
KW - Peer Relations  
KW - School Based Intervention  
KW - Bullying  
KW - Coercion  
KW - Peers  
RP - NOT IN FILE  
SP - 754  
JF - Mennuti, Rosemary B [Ed]; Christner, Ray W [Ed]; Freeman, Arthur [Ed]  
IS - 2012

N2 - (from the chapter) Peer aggression is an all-too-common occurrence in children's daily lives. The nature and frequency of children's peer conflicts shift and change across the developmental stages, such that participation in physical aggression is quite common among toddlers, and participation in verbal and relational aggression becomes quite common in adolescence. In this rough-and-tumble world of children's peer interactions, the ability to cope with and respond effectively to aggressive overtures is a critical adaptive skill. In some instances, however, the form and intensity of peer aggression make it unlikely that children can respond effectively, and it is unreasonable to expect them to do so. This chapter will describe one form of peer aggression-bullying-that is never adaptive, and is often quite damaging to the children who bully and to those who are bullied. Bullying will be described as a cognitive-behavioral phenomenon that is part of the broader framework of childhood aggression and that occurs within a social-ecological context. (PsycINFO Database Record (c) 2013 APA, all rights reserved)

AD - Doll, Beth: College of Education and Human Science, University of Nebraska-Lincoln, Lincoln, NE, US Swearer, Susan M.: University of Nebraska-Lincoln, Lincoln, NE, US Collins, Adam M.: School Psychology Program, University of Nebraska-Lincoln, Lincoln, NE, US Chadwell, Mindy R.: School Psychology Program, University of Nebraska-Lincoln, Lincoln, NE, US Dooley, Kadie: University of Nebraska-Lincoln, Lincoln, NE, US Chapla, Brooke A.: University of Nebraska-Lincoln, Lincoln, NE, US

ER -

TY - RPRT

ID - 1081

T1 - Playing and Learning Together: Patterns of Social Interaction in Handicapped and Nonhandicapped Children

A1 - Rogers-Warren,Ann

Y1 - 1980///

N1 - Availability - Level 1 - Available online, if indexed January 1993 onward

Last updated - 2012-12-14

KW - ERIC,Resources in Education (RIE)

KW - Preschool Education

KW - Teacher Role

KW - Moderate Mental Retardation

KW - Play

KW - High Risk Persons

KW - Social Behavior

KW - Mild Mental Retardation

KW - Mainstreaming

KW - Intervention

KW - Peer Relationship

KW - Interpersonal Competence

KW - Disabilities

KW - Down Syndrome

KW - ERIC

RP - NOT IN FILE

SP - 22

N2 - Two projects at the Kansas Early Childhood Institute investigated characteristics of social interaction by handicapped, at risk, and nonhandicapped children. The first project examined patterns of social interaction and play behavior among preschool children in an integrated classroom. A longitudinal observation of four mild to moderately retarded Down's syndrome children (5 to 6.5 years old) and four nonhandicapped Ss (4.5 to 5 years old) was conducted. Results indicated that handicapped and nonhandicapped children preferred the same types of activities. Handicapped children most frequently selected handicapped playmates, and nonhandicapped children usually selected nonhandicapped playmates. Handicapped Ss spent more time engaged in solitary play than nonhandicapped Ss. The second project described the specific social skills and interaction parameters exhibited by 15 normal, at risk, and handicapped preschoolers in a mainstreamed classroom. Handicapped children typically showed delays in social interaction skills commensurate with their general developmental delays; however, there was considerable variability across all types of Ss. Results suggest that altering either the settings or consequences for social interaction will result in increased interactions. Activities that bring the children into physical proximity and play equipment that require more than one child can enhance social

interactions. Directly prompting or instructing a child to interact with another child or to enter an activity are also frequently successful. In some cases, teacher praise or the contingent provision of some desirable activity or object when social interaction occurs are useful strategies. (Author/SEW)

UR - <http://search.proquest.com/docview/63475360?accountid=14701>

ER -

TY - JOUR

ID - 1083

T1 - Categorising Risky Play--How Can We Identify Risk-Taking in Children's Play?

A1 - Sandseter, Ellen Beate Hansen

Y1 - 2007/06//

N1 - Last updated - 2012-12-14

SubjectsTermNotLitGenreText - 7940 126; 11655 1474 316 8016 4542; 8135 10591 8267 3417 8016 4542 5703 4908 8917; 8996; 5472 3629 6582; 4109 4335; 8127 11655 1474 316 8016 4542; 7234; 8517 8836

KW - Structured Interviews

KW - Norway

KW - ERIC, Current Index to Journals in Education (CIJE)

KW - Early Childhood Education

KW - Preschool Education

KW - Qualitative Research

KW - Preschool Teachers

KW - Risk

KW - Foreign Countries

KW - Play

KW - Young Children

KW - Observation

KW - Interviews

KW - Preschool Children

KW - ERIC

RP - NOT IN FILE

SP - 237

EP - 252

JA - European Early Childhood Education Research Journal

VL - 15

IS - 2

PB - Routledge. , 325 Chestnut Street Suite 800, Philadelphia, PA 19106.

N2 - There is a growing debate on the balance between making sure our children are safe versus letting the children play in physically and emotionally stimulating and challenging environments. The focus is now on children's right to do risky play. There are no studies categorising risky play. The present study has aimed to do this. Qualitative observations of 38 children and semi-structured interviews with 8 children and 7 employees from two Norwegian preschools gave 6 categories of risky play: 1) Play with great heights; 2) Play with high speed; 3) Play with harmful tools; 4) Play near dangerous elements; 5) Rough-and-tumble play; and 6) Play where the children can "disappear"/get lost. The reliability of the analysed categories was tested through a second opinion made by an experienced preschool teacher, who has long and varied experience with children's play in preschools

SN - 1350-293X, 1350-293X

UR - <http://search.proquest.com/docview/61885365?accountid=14701>

ER -

TY - JOUR

ID - 1084

T1 - The archaeology of mind: Neuroevolutionary origins of human emotion. [References]

A1 - Panksepp, Jaak

Y1 - 2012///

N1 - Book: 2012-02256-000

English

Book; Authored Book

(Created by PsycINFO) Preface and acknowledgments Foreword by Daniel J. Siegel Ancestral passions The evolution of affective consciousness: Studying emotional feelings in other animals The SEEKING system: Brain sources of eager anticipation, desire, euphoria, and the quest for everything The ancestral sources of RAGE The ancestral roots of FEAR Beyond instincts: Learning and the affective foundations of memory LUSTful passions of the mind: From reproductive urges to romantic love Nurturing love: The CARE System Born to cry: The PANIC/GRIEF system and the genesis of life-sustaining social bonds PLAYful dreamlike circuits of the brain: The ancestral sources of social joy and laughter Toward a neurobiology of the soul: The core SELF and the genesis of primary-process feelings Brain emotional systems and affective qualities of mental life: From animal affects to human psychotherapeutics Philosophical reflections and complaints: Can we go from mice to men and back again? References Index

KW - PsycInfo

KW - Rough and Tumble

KW - Brain

KW - Emotions

KW - Mind

KW - Theory of Evolution

KW - Cognitive Neuroscience

KW - Affective Disorders

KW - Emotional Disturbances

KW - Emotional States

KW - Mental Disorders

RP - NOT IN FILE

SP - 562

JF - (2012)

VL - The archaeology of mind

N2 - (from the jacket) What makes us happy? What makes us sad? How do we come to feel a sense of enthusiasm? What fills us with lust, anger, fear, or tenderness? Traditional behavioral and cognitive neuroscience have yet to provide satisfactory answers. The Archaeology of Mind presents an affective neuroscience approach-which takes into consideration basic mental processes, brain functions, and emotional behaviors that all mammals share-to locate the neural mechanisms of emotional expression. It reveals-for the first time-the deep neural sources of our values and basic emotional feelings. This book elaborates on the seven emotional systems that explain how we live and behave. These systems originate in deep areas of the brain that are remarkably similar across all mammalian species. When they are disrupted, we find the origins of emotional disorders: (1) SEEKING: how the brain generates a euphoric and expectant response; (2) FEAR: how the brain responds to the threat of physical danger and death; (3) RAGE: sources of irritation and fury in the brain; (4) LUST: how sexual desire and attachments are elaborated in the brain; (5) CARE: sources of maternal nurturance; (6) GRIEF: sources of non-sexual attachments; (7) PLAY: how the brain generates joyous, rough-and-tumble interactions; and (8) SELF: a hypothesis explaining how affects might be elaborated in the brain The book offers an evidence-based evolutionary taxonomy of emotions and affects and, as such, a brand-new clinical paradigm for treating psychiatric disorders in clinical practice. (PsycINFO Database Record (c) 2012 APA, all rights reserved)

AD - Panksepp, Jaak: Center for the Study of Animal Well-Being, Department of Veterinary Comparative Anatomy, Pharmacology, and Physiology, College of Veterinary Medicine, Washington State University, Pullman, WA, US Biven, Lucy: Department of Psychotherapy, Child and Adolescent Mental Health Service, National Health Service, LEC, England

ER -

TY - JOUR

ID - 1085

T1 - Children's Expressions of Exhilaration and Fear in Risky Play

A1 - Sandseter, Ellen Beate Hansen

Y1 - 2009///

N1 - Last updated - 2012-12-14

SubjectsTermNotLitGenreText - 4109 4335; 11655 1474 316 8016 4542; 7940 126; 7841 909; 3899 8415; 8996; 5183 2877; 9015; 1463 9074; 9473; 2798; 8127 11655 1474 316 8016 4542; 8130 3085 3150

KW - Norway  
KW - ERIC,Current Index to Journals in Education (CIJE)  
KW - Early Childhood Education  
KW - Preschool Education  
KW - Play  
KW - Injuries  
KW - Young Children  
KW - Fear  
KW - Child Safety  
KW - Risk  
KW - Foreign Countries  
KW - Developmental Stages  
KW - Role  
KW - Self Expression  
KW - Preschool Children  
KW - Physical Activity Level  
KW - ERIC  
RP - NOT IN FILE  
SP - 92  
EP - 106  
JF - Contemporary Issues in Early Childhood  
VL - 10  
IS - 2  
PB - Symposium Journals. P.O. Box 204, Didcot, Oxford, OX11 9ZQ, UK. Tel: +44-1235-818-062; Fax: +44-1235-817-275; e-mail: [subscriptions@symposium-journals.co.uk](mailto:subscriptions@symposium-journals.co.uk); Web site: <http://www.wwwwords.co.uk/ciec>  
N2 - Children naturally seek and conduct exciting forms of play that involve a risk of physical injury (risky play). Even though several prior studies give descriptions of risky play, none of them deeply explore children's expressions of how they experience different kinds of risky play. This study aims to do that. The results from video observations of children's risky play in two Norwegian preschools reveal that children experience several emotions, expressed bodily, facially, and verbally, while engaging in risky play. Their experiences include both pure exhilaration and pure fear, and quite often both emotions are present at the same time. The findings also indicate that one of the main aspects of risky play is to keep the exhilaration bordering on the feeling of pure fear; but if pure fear occurs, the play ends with withdrawal. Suggested implications of the study are that risk taking should be acknowledged as an important part of children's play, and that children should be able to engage in challenging play adjusted to their individual sense of risk and urge for exhilaration. (Contains 1 table.)  
SN - 1463-9491, 1463-9491  
UR - <http://search.proquest.com/docview/742865236?accountid=14701>  
ER -  
  
TY - JOUR  
ID - 1086  
T1 - "It Tickles in My Tummy": Understanding Children's Risk-Taking in Play through Reversal Theory  
A1 - Sandseter, Ellen Beate Hansen  
Y1 - 2010///  
N1 - Last updated - 2012-12-14  
SubjectsTermNotLitGenreText - 7940 126; 3395 8930 909; 5472 3629 6582; 8996; 10181 730; 7802 7807 4918 5964; 3899 8415; 619 915; 728 6447; 4109 4335  
KW - Structured Interviews  
KW - Norway  
KW - ERIC,Current Index to Journals in Education (CIJE)  
KW - Preschool Education  
KW - Arousal Patterns  
KW - Risk  
KW - Foreign Countries  
KW - Play  
KW - Student Attitudes

KW - Fear

KW - Emotional Response

KW - Attitude Measures

KW - Interviews

KW - Phenomenology

KW - ERIC

RP - NOT IN FILE

SP - 67

EP - 88

JA - Journal of Early Childhood Research

VL - 8

IS - 1

PB - SAGE Publications. 2455 Teller Road, Thousand Oaks, CA 91320.

N2 - "It tickles in my tummy" is one of the most frequent answers when children are asked to describe what they experience when engaging in risky play. Why do children take risks in spite of the fact that this can be a harmful and even fatal activity? This article aims to explore this issue. Semi-structured interviews of 23 pre-school children aged four and five years were analyzed on the basis of the concepts of paratelic and telic states in Reversal Theory, the paratelic state being an excitement-seeking mode, and the telic state being an anxiety-avoiding mode. The phenomenological structure of children's risky play was found to be characterized by children expressing the ambiguous nature of quick reversals between the paratelic and telic states, producing both pleasant and unpleasant emotions. This "walk on the dangerous edge" seemed to be one of the primary goals of engaging in risky play. As long as the paratelic state dominated the situation, children embraced the potential fear by arousal-increasing strategies and maintained play. If the telic state dominated the situation, children described arousal-avoidance strategies and ultimately withdrew from play. (Contains 1 figure.)

SN - 1476-718X, 1476-718X

UR - <http://search.proquest.com/docview/61804170?accountid=14701>

ER -

TY - BOOK

ID - 1089

T1 - Contemporary Perspectives in Literacy in Early Childhood Education. Contemporary Perspectives in Early Childhood Education

A1 - Saracho,Olivia N.

A1 - Spodek,Bernard

Y1 - 2002///

N1 - Availability - Level 2 - Produced in microfiche (1966-2003)

Last updated - 2012-12-14

KW - ERIC,Resources in Education (RIE)

KW - Early Childhood Education

KW - Teacher Role

KW - Preschool Teachers

KW - Context Effect

KW - At Risk Persons

KW - Play

KW - Family Environment

KW - Young Children

KW - Story Reading

KW - Educational Environment

KW - Research Needs

KW - Reading Instruction

KW - Parent Student Relationship

KW - Parent School Relationship

KW - Educational Practices

KW - Theories

KW - Emergent Literacy

KW - Parent Attitudes

KW - Parents as Teachers

KW - Beliefs

KW - Family Literacy

KW - ERIC

RP - NOT IN FILE

SP - 197

PB - Information Age Publishing, , 80 Mason Street, P.O. Box 4967, Greenwich, CT 06831 (paper: ISBN-1-930608-28-4, \$29.95; cloth: ISBN-1-930608-29-2, \$63.25).

N2 - This book identifies and analyzes research studies related to the critical skills, environments, and adult interactions that contribute to young children's literacy development. Following introductory remarks on the reformation that has emerged in the language and literacy education of young children, the chapters are: (1) "Teachers' Roles in Promoting Literacy-Related Play" (Olivia N. Saracho); (2) "Hypermediating Literacy Activity: How Learning Contexts Get Recognized" (Kris Gutierrez and Lynda Stone); (3) "Creating Opportunities for Discourse: Language and Literacy Development for At-Risk Children" (Barbara Wasik, Mary Alice Bond, and Annemarie Hindman); (4) "Storybook Reading: What We Know and What We Should Consider" (Jon Shapiro, Jim Anderson, and Ann Anderson); (5) "New Directions in Family Literacy: Building Effective Partnerships between Home and School" (Trevor H. Cairney); (6) "Engaging Children in the Appropriation of Literacy: The Importance of Parental Beliefs and Practices" (Susan Sonnenschein); (7) "Promising Perspectives and Practices in Family Literacy" (Olivia N. Saracho); and (8) "Contemporary Views of Research and Practice in Early Childhood Literacy Programs" (Olivia N. Saracho and Bernard Spodek). Each chapter contains references. (KB)

SN - 1930608284

UR - <http://search.proquest.com/docview/62195721?accountid=14701>

ER -

TY - JOUR

ID - 1090

T1 - Play and interpersonal processes. [References]

A1 - Jent,Jason F.

Y1 - 2011///

N1 - Book: 2011-14208-012

English

Book; Edited Book

KW - PsycInfo

KW - Rough and Tumble

KW - Childhood Play Behavior

KW - Pretend Play

KW - Social Skills

KW - Sociocultural Factors

RP - NOT IN FILE

SP - 352

JF - Russ, Sandra W [Ed]; Niec, Larissa N [Ed]

IS - 2011

N2 - (from the chapter) The aim of this chapter is to discuss the basic research on children's play and interpersonal processes within a context that facilitates the integration of the basic and applied fields. Specifically, we examine three questions: (1) How does play relate to important interpersonal processes? (2) What cultural factors influence the link between play and interpersonal processes? and (3) What relevance does the basic play research have for applied settings? In order to address these questions, we first briefly review the development of social play and present definitions of the play types that hold particular relevance to interpersonal functioning: pretend play and rough-and-tumble-play. The interpersonal processes manifested within play are vast and multifaceted. For the purposes of this chapter, we focus on perspective taking, empathy, emotion regulation, and interpersonal schemas. Next, we review cultural influences on play. Finally, we discuss the implications of current research for applied study, such as the development of prevention and intervention programs. (PsycINFO Database Record (c) 2012 APA, all rights reserved)

AD - Jent, Jason F.: U Miami, Miller School of Medicine, Miami, FL, US Niec, Larissa N.: Central Michigan U, Department of Psychology, Mt Pleasant, MI, US Baker, Sarah E.: Wayne State U, School of Medicine, Pediatric Prevention Research Center, Detroit, MI, US  
ER -

TY - GEN

ID - 1091

T1 - Foster Care: Creating Interpersonal Change through Story-Telling and Family Play. Strategies to Support Client Assessment and Intervention

A1 - Schatz,Mona Struhsaker

A1 - Gaddis,Stephen R.

A1 - Zimmerman,Toni Schindler

Y1 - 1996/02//

N1 - Availability - Level 2 - Produced in microfiche (1966-2003)

SuppNotes - For related document, see CG 028 372

Last updated - 2012-12-14

KW - ERIC,Resources in Education (RIE)

KW - Adult Education

KW - Caregiver Child Relationship

KW - Parenting Skills

KW - At Risk Persons

KW - Play

KW - Foster Family

KW - Professional Training

KW - Social Services

KW - Personal Narratives

KW - Foster Children

KW - Interpersonal Relationship

KW - Youth

KW - ERIC

RP - NOT IN FILE

SP - 95

N2 - Story-telling and family play can exert powerful effects on children. Some beliefs, values, and personal life-style choices that relate to how play is created are examined. Using the primary concepts in "narrative therapy," "adventure-based programming," and "family play therapy," play is employed to create an empowerment framework to consider the unique lives of social services clients. This empowerment framework promotes a means for individuals to explore their own meaning and sense of self-expression, rather than holding on to negative and pathological interpretations of their ideas and behaviors. Topics covered include (1) the value of family play; (2) how safe and successful play creates a framework for play and introduces a number of beneficial games; (3) how human development and the value of stories introduces the "narrative therapy" approach to one's life stories; (4) ways in which foster children's stories focus on the ways foster children view their world; and (5) exercises for rewriting the foster child's story through play and creating stories based on love, trust and hope. Designed for collaborative training of foster parents and caseworkers, the manual includes materials for both the trainer and the trainee. "Play is Learning: A Supplement," and "Guidelines for Selecting Toys" Contains two supplements, along with resources, references, and an evaluation. (EMK)

UR - <http://search.proquest.com/docview/62498209?accountid=14701>

ER -

TY - GEN

ID - 1092

T1 - Interventions for Toddlers with Autism Spectrum Disorders: An Evaluation of Research Evidence

A1 - Schertz,Hannah H.

A1 - Reichow,Brian

A1 - Tan,Paulo

A1 - Vaiouli,Potheini

A1 - Yildirim,Emine



Y1 - 2012/09//  
N1 - Last updated - 2013-02-26  
KW - ERIC,Current Index to Journals in Education (CIJE)  
KW - At Risk Persons  
KW - Toddlers  
KW - Play  
KW - Well Being  
KW - Case Studies  
KW - Pervasive Developmental Disorders  
KW - Intervention  
KW - Literature Reviews  
KW - Outcomes of Treatment  
KW - Comparative Analysis  
KW - Family Programs  
KW - Parents  
KW - Attention  
KW - Autism  
KW - Effect Size  
KW - ERIC  
RP - NOT IN FILE  
SP - 166  
EP - 189  
JF - Journal of Early Intervention  
VL - 34  
IS - 3  
PB - SAGE Publications. 2455 Teller Road, Thousand Oaks, CA 91320.  
N2 - Recently emerging intervention studies for toddlers with autism spectrum disorders (ASD) were reviewed through a systematic assessment of intervention outcomes, research rigor, and intervention features. The review includes published peer-reviewed experimental studies of toddlers with high risk for or diagnosis of ASD in which the majority of interventions occurred before age 36 months. Of 20 identified research studies, 6 were group comparison studies, all of which showed small to large magnitudes of effect when a uniform metric was applied. Fourteen were single-case design (SCD) studies, all of which reported effects on a variety of outcomes. When grouped by area of intervention focus (communication, general development, family well-being, imitation, joint attention, and play), commonly identified needs within focus areas were for replication, common measures, and authentic practices. A majority of studies in most focus areas showed strong to acceptable levels of research rigor, though this is an area of ongoing need. (Contains 3 tables.)  
UR - <http://search.proquest.com/docview/1312422969?accountid=14701>  
ER -  
  
TY - JOUR  
ID - 1093  
T1 - A Brief Program Improves Counseling of Mothers with Children Who Have Persistent Aggression  
A1 - Scholer,Seth J.  
A1 - Reich,Stephanie M.  
A1 - Boshers,Robyn B.  
A1 - Bickman,Len  
Y1 - 2012/04//  
N1 - Last updated - 2013-02-26  
SubjectsTermNotLitGenreText - 8168; 8996; 5470; 6485 8260 3150; 3400 8415; 1664; 11655 1474 316 8016 4542; 6823 3932 8016 4542 7577 3816; 324 545 9738 909; 913 2877; 6866 10621 3227 6582; 8299; 2302 6582; 7940 126; 7662 6506 10669; 1955 3629 6582; 5922 10621 3227 6582; 4452 1806 10278 8016 4542; 6501 4452 1806 10278 8016 4542; 3281 10087 2574 3629 6582; 5472 3629 6582; 2894; 8490 8762  
KW - ERIC,Current Index to Journals in Education (CIJE)  
KW - Program Effectiveness  
KW - Medical Students  
KW - Graduate Students

KW - Play  
 KW - Young Children  
 KW - Pediatrics  
 KW - Punishment  
 KW - Mothers  
 KW - Multimedia Instruction  
 KW - Intervention  
 KW - Discipline  
 KW - Medical Education  
 KW - Comparative Analysis  
 KW - Risk  
 KW - Prevention  
 KW - Counseling Techniques  
 KW - Behavior Disorders  
 KW - Lecture Method  
 KW - Clinics  
 KW - Interviews  
 KW - Aggression  
 KW - Effect Size  
 KW - Empathy  
 KW - ERIC  
 RP - NOT IN FILE  
 SP - 991  
 EP - 1004  
 JF - Journal of Interpersonal Violence  
 VL - 27  
 IS - 6

PB - SAGE Publications. 2455 Teller Road, Thousand Oaks, CA 91320.

N2 - Objective: To assess whether a multimedia program can affect counseling behavior related to one of the strongest risk factors for violence later in life, persistent early childhood aggression. Method: The design was a controlled trial with unobtrusive measurement in a clinic setting. A researcher, pretending to be the mother of a 2 1/2 year old boy, called 19 pediatric residents during clinic hours and requested advice on how to manage her child's persistently hurtful behavior. The intervention was a 40-min lecture focusing on a multimedia program, "Play Nicely", which teaches accepted strategies for managing aggression in young children ages 1-7 years. Residents' responses were blindly assessed to determine the treatment effect of the intervention. Results: Compared with the control group (C), residents in the intervention (I) group were more likely to recommend setting the rule (I: 100% vs. C: 31%,  $p = .01$ ), redirecting (I: 83% vs. C: 8%,  $p = 0.003$ ), promoting empathy (I: 50% vs. C: 0%,  $p = 0.02$ ), and more likely to discourage the use of physical punishment (I: 83% vs. C: 31%). These are the primary strategies encouraged by the intervention. The magnitude of the effect size was very large for each of these three strategies, ranging from  $d = 1.1$  to  $2.3$ . Conclusions: A brief intervention can improve the counseling behavior of primary care physicians regarding persistent childhood aggression. The findings have implications for child abuse prevention, violence prevention, medical education, and how to improve anticipatory guidance within primary care. (Contains 3 tables.)

SN - 0886-2605, 0886-2605

UR - <http://search.proquest.com/docview/1312420854?accountid=14701>

ER -

TY - THES

ID - 1094

T1 - An Examination of Play Behaviors in Young At-Risk Children

A1 - Schwabe, Adrienne

A1 - Craig-Unkefer, Lesley

Y1 - 2008///

N1 - Last updated - 2012-12-14

SubjectsTermNotLitGenreText - 7940 126; 8127 11655 1474 316 8016 4542; 1432 909; 2888 2883 8016 4542

11658 316; 694 8016 4542; 9956 9955 5752; 2790; 5748 11228 1703 5053 2787; 5446 1970 1; 5470  
IdentKeywords - Preschool Language Scale; Child Behavior Checklist; Peabody Picture Vocabulary Test

KW - Preschool Language Scale  
KW - Child Behavior Checklist  
KW - Peabody Picture Vocabulary Test  
KW - ERIC,Resources in Education (RIE)  
KW - At Risk Persons  
KW - Language Acquisition  
KW - Play  
KW - Child Behavior  
KW - Interpersonal Competence  
KW - Speech Acts  
KW - Developmental Delays  
KW - Disadvantaged Youth  
KW - Intervention  
KW - Preschool Children  
KW - ERIC  
RP - NOT IN FILE  
SP - 42

N2 - This study examined the effects that a multi-component intervention had on play behaviors and mean length of utterance (MLU) of eight Head Start children at risk for language delays and social skill development. The intervention consisted of three components: (a) a planning period included reading a story book that illustrated the play theme and use of the social pragmatic communication strategies, practice using vocabulary to be used in play, and choosing roles for the thematic activity; (b) a 10-minute play session in which the interventionist coached children to interact while they played with the thematic related toys; and (c) a brief reporting period in which children reviewed their use of social pragmatic strategies and specific vocabulary. Increases in complex play and MLU were observed from baseline to intervention for all children. The increases however, were not consistent among dyads. (Contains 4 tables and 15 figures.)

UR - <http://files.eric.ed.gov/fulltext/ED505793.pdf>

ER -

TY - JOUR

ID - 1095

T1 - Behavioral Control in At-Risk Toddlers: The Influence of the Family Check-Up

A1 - Shelleby,Elizabeth C.

A1 - Shaw,Daniel S.

A1 - Cheong,JeeWon

A1 - Chang,Hyein

A1 - Gardner,Frances

A1 - Dishion,Thomas J.

A1 - Wilson,Melvin N.

Y1 - 2012///

N1 - Last updated - 2013-04-02

SubjectsTermNotLitGenreText - 5470; 916 8234; 7537 3851 5449 8768; 1432 909; 2207 4542 8852 6582; 7940 126; 9621 3816 8016 4542; 1309 8016 4542; 1459; 4815 6582; 9457 909; 7576 909; 914 2094; 3849 8331; 11655 1474 316 8016 4542; 694 8016 4542; 8535 6447; 7577 3816 8016 4542; 3395 8930 909; 1404 8697

KW - Child Behavior Checklist  
KW - Eyberg Child Behavior Inventory  
KW - ERIC,Current Index to Journals in Education (CIJE)  
KW - At Risk Persons  
KW - Questionnaires  
KW - Play  
KW - Young Children  
KW - Child Behavior  
KW - Home Visits  
KW - Intervention

KW - Behavior Problems

KW - Caregivers

KW - Parenting Styles

KW - Control Groups

KW - Family Programs

KW - Behavior Modification

KW - Child Rearing

KW - Parent Child Relationship

KW - Check Lists

KW - Emotional Response

KW - Siblings

KW - Parents

KW - Self Control

KW - ERIC

RP - NOT IN FILE

SP - 288

EP - 301

JF - Journal of Clinical Child and Adolescent Psychology

VL - 41

IS - 3

PB - Routledge. , 325 Chestnut Street Suite 800, Philadelphia, PA 19106.

N2 - This study examines the role of one component of emotion regulation, behavioral control, in the growth of children's early behavior problems by examining whether increases in parental positive behavior support brought about by a family-centered intervention were associated with greater child behavioral control, and whether greater behavioral control at age 3 mediated the association between improvements in aspects of positive behavior support from ages 2 to 3 and decreases in growth of behavior problems from ages 2 to 4. The sample included 713 at-risk children (50% female) and their primary caregivers (50% European American, 28% African American, 13% biracial, 9% other) who were randomly assigned to the intervention or control group. Children had a mean age of 29.91 months at the initial assessment. Data were collected through home visits at child ages 2 to 4, which involved questionnaires for primary caregivers and structured and unstructured play activities for children with primary and alternative caregivers and siblings. Results indicated that the intervention improved parental positive behavior support and reduced growth of child behavior problems. One dimension of positive behavior support, proactive parenting, was modestly associated with behavioral control at age 3, which in turn was significantly associated with growth in behavior problems from ages 2 to 4, with greater behavioral control related to lower levels of growth in behavior problems. Results provide support for the notion that proactive parenting is an important factor in the development of children's behavioral control and that behavioral control plays an important role in the growth of behavior problems. (Contains 1 table, 3 figures and 1 footnote.)

SN - 1537-4416, 1537-4416

UR - <http://search.proquest.com/docview/1322241891?accountid=14701>

ER -

TY - JOUR

ID - 1096

T1 - The assessment of bullying. [References]

A1 - Cornell,Dewey G.

Y1 - 2010///

N1 - Book: 2010-06797-020

English

Book; Edited Book

KW - PsycInfo

KW - Rough and Tumble

KW - Victimization

KW - Bullying

KW - Verbal Abuse

RP - NOT IN FILE

SP - 614

JF - Jimerson, Shane R [Ed]; Swearer, Susan M [Ed]; Espelage, Dorothy L [Ed]

IS - 2010

N2 - (from the chapter) What is bullying? Bullying can generally be defined as the act of repeatedly humiliating a weaker person. Humiliation can be accomplished by physical intimidation or assault, or by verbal abuse that ridicules or demeans someone. A more subtle form of bullying involves excluding someone from social activities so that the person feels rejected and inferior to others. Thus bullying may be physical, verbal, or social. A bully is in a position of dominance or superiority over the victim. Especially among boys, dominance might be achieved because one boy is larger or stronger than the other, or because several boys outnumber their victim. Among girls, physical size may not matter as much as social status and popularity. In all cases, the bully intimidates the victim, who is made to feel inferior. Bullying does not occur between equals, which distinguishes it from ordinary conflict between peers. Because bullying is such a broad and abstract concept, it is difficult to distinguish from other forms of peer aggression and play. Consider the example of one boy who shoves another boy: If the aggressor is bigger than his victim, it might be bullying, but if the two boys are the same size, it is not bullying. If the action is done in a playful manner and the smaller boy is not hurt or distressed, the incident might be regarded as horseplay, but not bullying. And even when the bigger boy acts with malice, if the incident only happens once, the behavior might not be labeled bullying. (PsycINFO Database Record (c) 2012 APA, all rights reserved)

AD - Cornell, Dewey G.: Curry Programs in Clinical and School Psychology, University of Virginia, Charlottesville, VA, US Bandyopadhyay, Sharmila: Curry Programs in Clinical and School Psychology, University of Virginia, Charlottesville, VA, US

ER -

TY - RPRT

ID - 1097

T1 - Parenting through Play for School Readiness: Interim Report of Year One. Research Findings

A1 - Singer, Jerome L.

A1 - Singer, Dorothy G.

Y1 - 1998/09//

N1 - Availability - Level 1 - Available online, if indexed January 1993 onward

Last updated - 2012-12-14

KW - ERIC, Resources in Education (RIE)

KW - Preschool Education

KW - Parent Education

KW - Low Income Groups

KW - At Risk Persons

KW - Play

KW - Parent Influence

KW - Parent Role

KW - Academic Achievement

KW - Parent Child Relationship

KW - Parent Participation

KW - Disadvantaged Youth

KW - Program Evaluation

KW - Student Behavior

KW - Preschool Children

KW - School Readiness

KW - ERIC

RP - NOT IN FILE

SP - 48

N2 - A 2-year project was undertaken to develop, test, and distribute a video-based program to train low-income parents in engaging their 3- to 5-year-old children in highly motivating play techniques in order to enhance children's cognitive, social and motor skills for school readiness. An evaluation was conducted of the Year One phase of the training materials and procedures, and the effectiveness of the parent-training in leading to higher school readiness scores. The participants were the parents of 103 preschool children from inner city schools. The findings of the child assessments after 2 weeks of parent training indicate that children of parents

who participated in the program showed significantly higher scores than the control children in the Total School Readiness Test, particularly in the areas of vocabulary, nature knowledge, general information, and awareness of good manners. This suggests that types of play-training methods and materials developed for the project can impact the ability of low-income parents to enhance their children's cognitive and social skills. (Twelve appendices include a list of participating schools, data on the child care centers, and copies of testing instruments and data collection materials.) (JPB)

UR - <http://search.proquest.com/docview/62494276?accountid=14701>

ER -

TY - JOUR

ID - 1098

T1 - Parent-Child Interactions and Obesity Prevention: A Systematic Review of the Literature

A1 - Skouteris,Helen

A1 - McCabe,Marita

A1 - Ricciardelli,Lina A.

A1 - Milgrom,Jeannette

A1 - Baur,Louise A.

A1 - Aksan,Nazan

A1 - Dell'Aquila,Daniela

Y1 - 2012///

N1 - Last updated - 2012-12-14

SubjectsTermNotLitGenreText - 7223 1096 7843 5051 2923 2877 1088; 5470; 8168; 7537 3851 5449 8768; 6124 8477; 8099; 5350 8852 6582; 1096 7843 5051; 3103; 3102 2923 2877; 7940 126; 7575 9690 1; 7576 909; 4659 4635 126; 4660 7858 7862 4634; 4637 909; 1389 6582; 8852 6582; 6445 7230; 6446 6582; 8996; 7546 5127; 1443 5053 2787; 1446 4634

KW - ERIC,Current Index to Journals in Education (CIJE)

KW - Adult Education

KW - Early Childhood Education

KW - Elementary Secondary Education

KW - Parenting Skills

KW - Parent Influence

KW - Research Methodology

KW - Child Health

KW - Intervention

KW - Literature Reviews

KW - Measurement Techniques

KW - Health Promotion

KW - Body Weight

KW - Parenting Styles

KW - Parent Child Relationship

KW - Child Development

KW - Health Behavior

KW - Measurement Objectives

KW - Eating Disorders

KW - Predictor Variables

KW - Eating Habits

KW - Obesity

KW - Play

KW - Risk

KW - Prevention

KW - Interaction Process Analysis

KW - Change Strategies

KW - Health Related Fitness

KW - ERIC

RP - NOT IN FILE

SP - 153

EP - 174

JF - Early Child Development and Care

VL - 182

IS - 2

PB - Routledge, 325 Chestnut Street Suite 800, Philadelphia, PA 19106.

N2 - Child obesity research has generally not examined multiple layers of parent-child relationships during weight-related activities such as feeding, eating and play. A literature review was conducted to locate empirical studies that measured parent-child interactions and child eating and child weight variables; five papers met the inclusion criteria and were included in the review. The findings of the review revealed that parent-child relationships are an important element in explaining the unhealthy trend of childhood obesity. We argue that prevention/intervention strategies must extend on the current models of parenting by targeting the family from a bi-directional perspective, and focusing, specifically, on the mutually responsive orientation that exists in the parent-child relationship. (Contains 1 table.)

SN - 0300-4430, 0300-4430

UR - <http://search.proquest.com/docview/964179282?accountid=14701>

ER -

TY - GEN

ID - 1099

T1 - Shaping the Future of Mathematics Education. Proceedings of the Annual Conference of the Mathematics Education Research Group of Australasia (33rd, Freemantle, Western Australia, Australia, July 3-7, 2010)

A1 - Sparrow, Len

A1 - Kissane, Barry

A1 - Hurst, Chris

Y1 - 2010/07//

N1 - Last updated - 2012-12-14

KW - ERIC, Resources in Education (RIE)

KW - Elementary Secondary Education

KW - Higher Education

KW - Elementary School Mathematics

KW - Course Content

KW - Indigenous Populations

KW - Play

KW - Numeracy

KW - Conferences (Gatherings)

KW - Teacher Education

KW - Secondary School Mathematics

KW - Mathematics Skills

KW - Computer Uses in Education

KW - Teacher Competencies

KW - Mathematics Education

KW - Problem Solving

KW - At Risk Students

KW - Mathematical Logic

KW - Foreign Countries

KW - Educational Change

KW - Mathematics Curriculum

KW - Preservice Teachers

KW - Mathematics Teachers

KW - Educational Technology

KW - Educational Research

KW - Teaching Methods

KW - ERIC

RP - NOT IN FILE

SP - 788

PB - Mathematics Education Research Group of Australasia. GPO Box 2747, Adelaide SA 5001, Australia.  
Tel: +61-8-8363-0288; Fax: +61-8-8362-9288; e-mail: sales@merga.net.au; Web site: <http://www.merga.net.au/>

N2 - These collected papers are a record of the proceedings of the 33rd Annual Conference of the Mathematics Education Research Group of Australasia entitled, "Shaping the Future of Mathematics Education." The conference is held in Fremantle, as was the previous conference a decade earlier. Keynote speakers are discussing issues that are emerging more sharply at the present time as the mathematics education community focuses on the education of Indigenous children, the scope of the mathematics curriculum and ways in which the content might be taught effectively, and the significant role of technologies in teaching and learning in the twenty-first century. Research papers are featured from mathematics educators from all states and territories of Australia, from colleagues in New Zealand, and from overseas--United Kingdom, Singapore, United States of America, India, Thailand, South Africa, and Indonesia. This set of proceedings includes abstracts and full papers for refereed research presentations, short communications of developing research, roundtable discussions, and symposia. Individual papers contain tables, footnotes, figures, references and appendices

SN - 9781920846251

UR - <http://search.proquest.com/docview/881455631?accountid=14701>

ER -

TY - BOOK

ID - 1100

T1 - Handbook of Research on the Education of Young Children. 2nd Edition

A1 - Spodek, Bernard

A1 - Saracho, Olivia N.

Y1 - 2006///

N1 - Last updated - 2012-12-14

KW - United States

KW - ERIC, Resources in Education (RIE)

KW - Early Childhood Education

KW - High Risk Students

KW - Inclusive Schools

KW - Play

KW - Motor Development

KW - Cognitive Development

KW - Young Children

KW - Multicultural Education

KW - Professional Development

KW - Child Care

KW - Creativity

KW - Bilingualism

KW - Moral Development

KW - Visual Arts

KW - Curriculum Development

KW - Interpersonal Competence

KW - Poverty

KW - Educational Policy

KW - Emergent Literacy

KW - Child Development

KW - Mathematical Concepts

KW - Feminism

KW - Educational Research

KW - ERIC

RP - NOT IN FILE

SP - 616

PB - Lawrence Erlbaum Associates. 10 Industrial Avenue, Mahwah, NJ, 07430.

N2 - This book is an essential reference on research in early childhood education not only in the United States but throughout the world. It provides a comprehensive overview of important contemporary issues and the information necessary to make judgments about these issues. The field has changed significantly since the



publication of the first edition of this "Handbook" in 1993, creating a need for an update. The "Handbook of Research on the Education of Young Children, Second Edition" is thus focused on research conducted over the past decade or so. The volume is organized into four parts: (1) Early Childhood Education and Child Development (New in this edition: Moral Development; The Development of Creativity); (2) Early Childhood Educational Curriculum (New in this edition: Movement or Dance Education; The Education of Linguistically and Culturally Diverse Children); (3) Foundations of Early Childhood Educational Policy (New in this edition: Childhood Poverty; The Education of Bilingual Children); and (4) Research and Evaluation Strategies for Early Childhood Education (New in this edition: Doing Historical Research in Early Childhood Education; Postmodern and Feminist Orientations). This book makes the expanding knowledge base related to early childhood education readily available and accessible. It is a valuable tool for all who work and study in the field. Following an introduction by B. Spodek and O. N. Saracho entitled, "A Researcher's Vade Mecum," this book presents the following chapters. Part I, Early Childhood Education and Child Development, includes: (1) Cognitive Development and the Education of Young Children (K. L. Seifert); (2) Young Children's Peer Relations and Social Competence (G. W. Ladd, S. L. Herald, and R. K. Andrews); (3) Children's Morality: Perspectives and Research (E. Johansson); (4) The Emotional Basis of Learning and Development in Early Childhood Education (S. A. Denham); (5) Motor Development in Young Children (D. L. Gallahue and J. C. Ozmun); and (6) The Development of Children's Creativity (M. A. Runco). Part II, Early Childhood Educational Curriculum, continues with: (7) Reconceptualizing Language Education in Early Childhood: Socio-Cultural Perspectives (J. Anderson, L. Moffatt, and J. Shapiro); (8) Emergent Literacy: Symbols at Work (S. E. Hill and S. Nichols); (9) The Literacy Education of Linguistically and Culturally Diverse Young Children: An Overview of Outcomes, Assessment, and Large-Scale Interventions (R. Rueda and D. B. Yaden, Jr.); (10) The Development of Young Children's Early Number and Operation Sense and Its Implications for Early Childhood Education (A. J. Baroody, M. L. Lai, and K. S. Mix); (11) Repositioning the Visual Arts in Early Childhood Education: A Decade of Reconsideration (C. M. Thompson); (12) The Dance of Learning (K. Bradley with M. Szegda); (13) The Musical Development and Education of Young Children (G. F. Welch); and (14) Pretend Play (R. D. Kavanaugh); and (15) Early Childhood Multicultural Education (P.G. Ramsey). Part III, Foundations of Early Childhood Educational Policy, contains: (16) Creating Play Environments for Early Childhood: Indoors and Out (J. A. Sutterby and J. Frost); (17) Childhood Poverty: Implications for School Readiness and Early Childhood Education (R. M. Ryan, R. C. Fauth, and J. Brooks-Gunn); (18) Effective Preschool Programs for Children at Risk of School Failure: A Best-Evidence Synthesis (B. Chambers, A. C. K. Cheung, and R. E. Slavin); (19) Educational Policy in the United States Regarding Bilinguals in Early Childhood Education (A. M. Wiese and E. E. Garcia); (20) Child Care for Young Children (C. Howes and K. Sanders); (21) Family Context in Early Childhood: A Look at Practices and Beliefs That Promote Early Learning (B. H. Fiese, T. Eckert, and M. Spagnola); (22) Early Childhood Teachers' Beliefs and Attitudes about Inclusion: What Does the Research Tell Us? (M. M. Ostrosky, B. M. Laumann, and W. Y. Hsieh); and (23) Preschool Teachers' Professional Development (O. N. Saracho and B. Spodek). Part IV, Research and Evaluation Strategies for Early Childhood Education, presents: (24) Alternative Means of Assessing Children's Learning in Early Childhood Classrooms (D. F. Gullo); (25) Evaluating the Quality of Early Childhood Educational Settings (R. Lambert, M. Abbott-Shim, and A. Sibley); (26) Integration, Innovation, and Evaluation in School-Based Early Childhood Services (J. Pelletier and C. Corter); (27) Qualitative Research: Paradigms and Possibilities (J. A. Hatch and G. Barclay-McLaughlin); (28) Feminist Issues in Early Childhood Scholarship (C. D. Thornton and L. S. Goldstein); (29) Beyond Certainties: Postmodern Perspectives, Research, and the Education of Young Children (S. Grieshaber and S. Ryan); (30) Early Childhood Education Research in Cross-National Perspective (J. L. Roopnarine and A. Metindogan); and (31) Historical Research in Early Childhood Education (B. S. F. Hinitz). [For the first edition of this book, see ED361107.]

SN - 0805847200

UR - <http://search.proquest.com/docview/62095654?accountid=14701>

ER -

TY - JOUR

ID - 1101

T1 - Competitive versus Cooperative Exergame Play for African American Adolescents' Executive Function Skills: Short-Term Effects in a Long-Term Training Intervention

A1 - Staiano, Amanda E.

A1 - Abraham, Anisha A.

A1 - Calvert, Sandra L.

Y1 - 2012/03//

N1 - Last updated - 2012-12-14

SubjectsTermNotLitGenreText - 7840 126; 5470; 197 316 8016 4542; 2207 4542 8852 6582; 7940 126; 11255 4270 126; 8426 9690 1; 9015; 1974 909; 3665 1710; 6186 5019; 7223 1096 7843 5051 2923 2877 1088; 293 7160 8016 4542; 2221 909; 1096 7843 5051; 3668 7840 126; 2267 10087 2574 3629 6582; 694 8016 4542; 7455

KW - ERIC,Current Index to Journals in Education (CIJE)

KW - At Risk Persons

KW - Obesity

KW - Video Games

KW - Play

KW - Cooperation

KW - Low Income

KW - African Americans

KW - Intervention

KW - Correlation

KW - Exercise

KW - Outcomes of Treatment

KW - Body Weight

KW - Physical Activities

KW - Control Groups

KW - Role

KW - Executive Function

KW - Psychomotor Skills

KW - Competition

KW - Adolescents

KW - ERIC

RP - NOT IN FILE

SP - 337

EP - 342

JF - Developmental Psychology

JA - Dev.Psychol.

VL - 48

IS - 2

PB - American Psychological Association. Journals Department, 750 First Street NE, Washington, DC 20002-4242.

N2 - Exergames are videogames that require gross motor activity, thereby combining gaming with physical activity. This study examined the role of competitive versus cooperative exergame play on short-term changes in executive function skills, following a 10-week exergame training intervention. Fifty-four low-income overweight and obese African American adolescents were randomly assigned to a competitive exergame condition, a cooperative exergame condition, or a no-play control group. Youths in the competitive exergame condition improved in executive function skills more than did those in the cooperative exergame condition and the no-play control group. Weight loss during the intervention was also significantly positively correlated with improved executive function skills. The findings link competitive exergame play to beneficial cognitive outcomes for at-risk ethnic minority adolescents

SN - 0012-1649, 0012-1649

UR - <http://search.proquest.com/docview/1140138716?accountid=14701>

ER -

TY - JOUR

ID - 1102

T1 - Children and play. [References]

A1 - Smith,Peter K.

Y1 - 2010//

N1 - Book: 2009-08420-000

English

Book; Authored Book

(Created by PsycINFO) (Abbreviated) Series editor's preface Acknowledgments An introduction to play A brief history of the study of play and of play theories Animal play: Definitions and descriptions Animal play: Theoretical perspectives on function Play in different cultures Physical activity play: Exercise play and rough-and-tumble Object play Pretend play: Description Pretend play: Theories and functions Some practical issues concerning play Concluding comments: Play and the middle way References Author index Subject index

KW - PsycInfo

KW - Rough and Tumble

KW - Childhood Development

KW - Childhood Play Behavior

KW - Early Childhood Development

KW - Age Differences

KW - Cross Cultural Differences

KW - Education

KW - Human Sex Differences

KW - Special Needs

RP - NOT IN FILE

SP - 256

EP - Blackwell

JF - (2010)

VL - Children and play. x, 256 pp.Wiley-Blackwell.

N2 - (from the cover) Using both contemporary and classic research, Smith examines how different age groups and sexes participate in a wide variety of play, including physical and rough-and-tumble play, play with objects, fantasy play and imaginary friends. The book gauges the function of play in early childhood education and the case for and against recess breaks in school. How play occurs in different societies and among various populations-including children with special needs-is also explored. With its comprehensive coverage of theoretical, cross-cultural, and evolutionary perspectives, Children and Play holds significant insights for parents, educators, and clinicians. (PsycINFO Database Record (c) 2012 APA, all rights reserved)

AD - Smith, Peter K.: Unit for School and Family Studies, Goldsmiths, University of London, London, United Kingdom

ER -

TY - RPRT

ID - 1103

T1 - The Effects of Prenatal Drug-Exposure on Toddlers' Temperament, Development and Play Behavior

A1 - Storkamp,Barbara J.

Y1 - 1993/03//

N1 - Availability - Level 1 - Available online, if indexed January 1993 onward

SuppNotes - Paper presented at the Biennial Meeting of the Society for Research in Child Development (60th, New Orleans, LA, March 25-28, 1993)

Last updated - 2012-12-14

KW - African Americans

KW - Fetal Drug Exposure

KW - ERIC,Resources in Education (RIE)

KW - Preschool Education

KW - At Risk Persons

KW - Toddlers

KW - Play

KW - Blacks

KW - Personality

KW - Foster Care

KW - Comparative Analysis

KW - Child Neglect

KW - Child Development

KW - Cocaine

KW - Child Abuse

KW - Drug Abuse

KW - ERIC

RP - NOT IN FILE

SP - 31

N2 - This study compared 17 toddlers identified as prenatally exposed to cocaine (along with marijuana, alcohol, or nicotine), with another group of 10 toddlers with no prenatal exposure. All subjects were African-American, 1-3 years of age, and in foster care. Toddlers were age- and gender-matched and compared on measures of temperament, development, growth and play behavior. There were no group differences in temperament, growth, and play behavior, but significant differences in development. The drug-exposed toddlers exhibited higher levels of development than the nonexposed toddlers. A majority of both groups, however, scored below age level on standard development measures. These results may be attributable to the fact that the comparison group was comprised of high-risk children placed in foster care primarily due to parental abuse and neglect. Findings also suggest that the effects of prenatal drug exposure are similar to developmental outcomes experienced by other high-risk groups of children. Contains 48 references. (Author/MDM)

UR - <http://search.proquest.com/docview/62782699?accountid=14701>

ER -

TY - JOUR

ID - 1104

T1 - Longitudinal Outcomes of Young High-Risk Adolescents with Imaginary Companions

A1 - Taylor, Marjorie

A1 - Hulette, Annmarie C.

A1 - Dishion, Thomas J.

Y1 - 2010/11//

N1 - Last updated - 2012-12-14

SubjectsTermNotLitGenreText - 7940 126; 3083 316 8016 4542; 2240 150 909; 694 8016 4542; 4979 2388 8409 5051; 6644 10278 8016 4542; 916 8234; 5472 3629 6582; 4203 5449 8768; 9808 10103; 7531 730; 1955 3629 6582; 4086 6175 1326 3629 6582 8836; 4738 9419 10278 8016 4542; 150 909; 194 5053 2787

KW - Child Behavior Checklist

KW - ERIC, Current Index to Journals in Education (CIJE)

KW - High Schools

KW - Middle Schools

KW - At Risk Persons

KW - Play

KW - Middle School Students

KW - Early Adolescents

KW - Adolescent Development

KW - Behavior Problems

KW - Comparative Analysis

KW - Friendship

KW - Imagination

KW - Followup Studies

KW - Adjustment (to Environment)

KW - Parent Attitudes

KW - Interviews

KW - Coping

KW - High School Students

KW - Social Status

KW - ERIC

RP - NOT IN FILE

SP - 1632

EP - 1636

JF - Developmental Psychology

JA - Dev. Psychol.

VL - 46

IS - 6

PB - American Psychological Association. Journals Department, 750 First Street NE, Washington, DC 20002-4242.

N2 - The creation and cultivation of an imaginary companion is considered to be a healthy form of pretend play in early childhood, but there tends to be a less positive view of older children who have them. To test the extent that having an imaginary companion in middle school is associated with positive or negative outcomes, an ethnically diverse sample of 152 middle school children at high risk for developing problem behaviors were interviewed about imaginary companions, coping styles, and problem behaviors. Although having a current imaginary companion (n = 13) was associated with using more positive coping strategies, peer nomination data indicated that these children had low social preference with peers. In addition, our data indicated that these children were perceived by their parents as having more problem behaviors compared with young adolescents who never had imaginary companions (n = 108) or children who had imaginary companions in the past (n = 31). However, a longitudinal follow-up at the end of high school indicated that the children who had imaginary companions in middle school showed greater positive adjustment on a multiple-indicator adjustment construct. (Contains 1 table.)

SN - 0012-1649, 0012-1649

UR - <http://search.proquest.com/docview/889925708?accountid=14701>

ER -

TY - JOUR

ID - 1105

T1 - Predictors of Social Skills for Preschool Children at Risk for ADHD: The Relationship between Direct and Indirect Measurements

A1 - Thomas, Lisa B.

A1 - Shapiro, Edward S.

A1 - DuPaul, George J.

A1 - Lutz, Gary J.

A1 - Kern, Lee

Y1 - 2011/04//

N1 - Last updated - 2012-12-14

SubjectsTermNotLitGenreText - 725 724 2877; 9791 8234; 7940 126; 3090 5470; 8127 11655 1474 316 8016 4542; 5446 1970 1; 8099; 694 8016 4542

KW - ERIC, Current Index to Journals in Education (CIJE)

KW - Preschool Education

KW - At Risk Persons

KW - Attention Deficit Hyperactivity Disorder

KW - Play

KW - Interpersonal Competence

KW - Early Intervention

KW - Social Problems

KW - Preschool Children

KW - Predictor Variables

KW - ERIC

RP - NOT IN FILE

SP - 114

EP - 124

JF - Journal of Psychoeducational Assessment

VL - 29

IS - 2

PB - SAGE Publications. 2455 Teller Road, Thousand Oaks, CA 91320.

N2 - The relationship between direct and indirect measurements of social skills and social problem behaviors for preschool children at risk for attention deficit hyperactivity disorder (ADHD) was examined. Participants included 137 preschool children, aged 3 to 5 years, at risk for ADHD, who were participating in a larger study examining the effects of early intervention for young children. Teachers rated the social skills and social problems of the participants. Direct observation data of participants were also collected at preschool during free play. Results support previous research on social skills assessment and suggest that indirect and direct measures

may not be measuring the same aspect of social skills. Thus, a variety of evaluation tools are necessary to comprehensively assess the social skills of preschool children with social challenges. (Contains 6 tables.)

SN - 0734-2829, 0734-2829

UR - <http://search.proquest.com/docview/870283524?accountid=14701>

ER -

TY - RPRT

ID - 1106

T1 - Where Our Children Play. Community Park Playground Equipment

A1 - Thompson, Donna

A1 - Bowers, Louis

Y1 - 1989///

N1 - Availability - Level 2 - Produced in microfiche (1966-2003)

Last updated - 2012-12-14

KW - ERIC, Resources in Education (RIE)

KW - Risk

KW - Recreational Facilities

KW - Recreation Legislation

KW - Questionnaires

KW - Play

KW - Community Surveys

KW - Playgrounds

KW - Safety

KW - Parks

KW - Equipment Evaluation

KW - Legal Responsibility

KW - ERIC

RP - NOT IN FILE

SP - 116

PB - American Alliance for Health, Physical Education, Recreation and Dance Publications, 1900 Association Drive, Reston, VA 22091.

N2 - This book describes the type and condition of playground equipment in community parks in the United States, and indicates the current status of safety of that environment. The results are then compared to play theories to explore the ways the environment stimulates play. Appropriate suggestions for change are made. Chapters cover the following topics: (1) the national survey of community park playground equipment; (2) results of the survey; (3) location, accessibility and equipment on park playgrounds; (4) swings, slides, and climbing equipment; (5) rotating, spring rocking, and seesaw equipment; (6) sand play containers, wading pools, signs, trees, and pathways; (7) litigation and playgrounds; and (9) plan of action: reflections and recommendations. Appendices include the instruments of the surveys conducted for this study. (JD)

UR - <http://search.proquest.com/docview/63029438?accountid=14701>

ER -

TY - JOUR

ID - 1107

T1 - The Evolution of a Children's Domestic Violence Counseling Group: Stages and Processes

A1 - Thompson, Heather E.

Y1 - 2011///

N1 - Last updated - 2012-12-14

SubjectsTermNotLitGenreText - 3862 11282 545 9738 909; 4516 5348 8768; 4513 2291 4552 4518; 11655 1474 316 8016 4542; 7941 10836 10839 8699; 2302 6582; 2293; 8068 7404; 8996; 547 8415; 9465 2898

KW - ERIC, Current Index to Journals in Education (CIJE)

KW - Risk

KW - Play Therapy

KW - Counseling Techniques

KW - Anxiety

KW - Young Children

KW - Power Structure  
KW - Counseling Effectiveness  
KW - Family Violence  
KW - Self Disclosure (Individuals)  
KW - Group Dynamics  
KW - Group Counseling  
KW - ERIC  
RP - NOT IN FILE  
SP - 178  
EP - 201  
JF - Journal for Specialists in Group Work  
VL - 36  
IS - 3  
PB - Routledge. , 325 Chestnut Street Suite 800, Philadelphia, PA 19106.  
N2 - The purpose of this qualitative case study is to illuminate the lived experiences of 4 young children between 6 and 7 years old who witnessed domestic violence while revealing the complex relationship between group process and stage development in their 18-week counseling group. Data revealed that processes occurring between and among group members shaped the evolution of the counseling group through a series of stages that are similar to those seen in adult counseling groups. The data also revealed developmental differences between group processes occurring between these young members and the ways in which group processes unfold in adult counseling groups. (Contains 1 figure.)  
SN - 0193-3922, 0193-3922  
UR - <http://search.proquest.com/docview/889924468?accountid=14701>  
ER -  
  
TY - JOUR  
ID - 1108  
T1 - Numeracy in the Early Years: Project Good Start  
A1 - Thomson,Sue  
Y1 - 2004///  
N1 - Last updated - 2012-12-14  
SubjectsTermNotLitGenreText - 10514 10486 909; 5046 8016 4542; 7196; 11162 4335; 10621 3227 6582; 8179 3352 3368 3150 3085; 4109 4335; 3085 3150; 9046 4335; 4954; 4723; 1326 3629 6582 8836; 4290; 7940 126; 8299  
KW - Australia  
KW - ERIC,Current Index to Journals in Education (CIJE)  
KW - Teachers  
KW - Early Childhood Education  
KW - Primary Education  
KW - Program Effectiveness  
KW - High Risk Students  
KW - Indigenous Populations  
KW - Play  
KW - Gender Differences  
KW - Case Studies  
KW - Numeracy  
KW - Identification  
KW - Rural Areas  
KW - Teacher Effectiveness  
KW - Foreign Countries  
KW - Urban Areas  
KW - Teaching Methods  
KW - ERIC  
RP - NOT IN FILE  
SP - 14  
EP - 17

JF - Australian Primary Mathematics Classroom

VL - 9

IS - 4

PB - Australian Association of Mathematics Teachers (AAMT). GPO Box 1729, Adelaide 5001, South Australia. Tel: +61-8-8363-0288; Fax: +61-8-8362-9288; e-mail: office@aamt.edu.au; Web site:

<http://www.aamt.edu.au>

N2 - "Numeracy in the early years: Project good start" was a national project that commenced in 2001, and will conclude this year. The key objective of the project is to improve children's early numeracy outcomes by investigating the practices and learning experiences that support the numeracy development of a sample of children in the year before school and in their first year of formal schooling. Case studies of some of these children were also prepared and analysed. Children's before-school experiences (including at home, and in preschool and childcare settings) and first year of school experiences were examined, with a particular focus on factors affecting early numeracy development. The project investigated the effects of children's backgrounds (for example, geographically isolated, rural, low socioeconomic urban areas, and areas with high indigenous populations); the different numeracy programs that these children encounter; the beliefs of parents and practitioners regarding numeracy development and learning; effective teaching strategies in numeracy and the identification of "at risk" children in numeracy. (Contains 2 figures.)

SN - 1326-0286, 1326-0286

UR - <http://search.proquest.com/docview/61906121?accountid=14701>

ER -

TY - JOUR

ID - 1109

T1 - Mother-Child Interactions and Symbolic Play between Toddlers and Their Adolescent or Mentally Retarded Mothers

A1 - Unger,Olivia

A1 - Howes,Carollee

Y1 - 1988///

N1 - Last updated - 2012-12-14

SubjectsTermNotLitGenreText - 197 316 8016 4542; Early Parenthood 3092; 4722; Mental Retardation 6540 2877; Mothers 6823 3932 8016 4542 7577 3816; 7271 10839; Parent Child Relationship 7537 3851 5449 8768; Play 7940 126; Toddlers 10883 11655 1474 316 8016 4542

KW - ERIC,Current Index to Journals in Education (CIJE)

KW - Mental Retardation

KW - Toddlers

KW - Early Parenthood

KW - Play

KW - High Risk Persons

KW - Parent Child Relationship

KW - Occupational Therapy

KW - Mothers

KW - Adolescents

KW - ERIC

RP - NOT IN FILE

SP - 237

EP - 249

JF - Occupational Therapy Journal of Research

VL - 8

IS - 4

N2 - A study investigated the symbolic play development and mother-child interactions between toddlers and their adolescent or mentally retarded mothers. Differences in maternal behaviors were found between the not-at-risk control group and the mentally retarded and adolescent mothers. (JOW)

UR - <http://search.proquest.com/docview/63183043?accountid=14701>

ER -

TY - RPRT



ID - 1110

T1 - Developmental Lags in Preterm Infants from One to Three Years of Age

A1 - Ungerer, Judy A.

A1 - Sigman, Marian

Y1 - 1983///

N1 - Last updated - 2012-12-14

KW - Correction for Prematurity

KW - Developmental Differences

KW - Developmental Patterns

KW - Developmentally Delayed Persons

KW - Sensorimotor Development

KW - ERIC, Current Index to Journals in Education (CIJE)

KW - Comparative Analysis

KW - Play

KW - Language Acquisition

KW - High Risk Persons

KW - Premature Infants

KW - Child Development

KW - Longitudinal Studies

KW - ERIC

RP - NOT IN FILE

SP - 1217

EP - 1228

N2 - Assessments of play, sensorimotor, language, and general developmental skills were administered to two preterm and 20 full-term infants. Preterm infants showed some delays greater than would be predicted from biological maturity alone, but delays were not present for all skills and generally were not maintained beyond 2 years of age. (Author/RH)

UR - <http://search.proquest.com/docview/63423370?accountid=14701>

ER -

TY - JOUR

ID - 1111

T1 - Developmental Changes in the Relations between Inhibitory Control and Externalizing Problems during Early Childhood

A1 - Utendale, William T.

A1 - Hastings, Paul D.

Y1 - 2011///

N1 - Last updated - 2012-12-14

SubjectsTermNotLitGenreText - 324 545 9738 909; 6823 3932 8016 4542 7577 3816; 8127 11655 1474 316 8016 4542; 8996; 3777 6886 10087 2574 3629 6582; 9457 909; 916 8234; 1701 1; 5180; 7940 126; 7676 5449 8768; 10883 11655 1474 316 8016 4542; 6816 7531 730; 5649 5264; 10482 730; 6447; 1443 5053 2787; 2798

KW - ERIC, Current Index to Journals in Education (CIJE)

KW - Kindergarten

KW - Preschool Education

KW - Measures (Individuals)

KW - Toddlers

KW - Play

KW - Mothers

KW - Teacher Attitudes

KW - Mother Attitudes

KW - Inhibition

KW - Behavior Problems

KW - Factor Analysis

KW - Peer Relationship

KW - Risk

KW - Cognitive Ability

KW - Developmental Stages

KW - Child Development

KW - Preschool Children

KW - Aggression

KW - Self Control

KW - ERIC

RP - NOT IN FILE

SP - 181

EP - 193

JF - Infant and Child Development

VL - 20

IS - 2

PB - Wiley-Blackwell. 111 River Street, Hoboken, NJ 07030-5774.

N2 - Deficits in executive function, and in particular, reduced capacity to inhibit a dominant action, are a risk factor for externalizing problems (EP). Inhibitory control (IC) develops in the later preschool and early childhood periods, such that IC might not regulate EP in toddlers and younger preschoolers. Aggression was observed during peer play for 66 girls and 49 boys, from 2.75 to 6.00 years ( $M = 4.14$ ,  $S.D. = 0.78$ ). Mothers reported on children's IC and EP concurrently and 12 months later, and concurrent teacher reports of EP were also collected. Factor analysis supported aggregation of mother and teacher-reported EP and observed physical aggression into one measure of externalizing difficulties. Mothers reported lower IC for children with more externalizing difficulties, and the inverse relation between IC and externalizing difficulties strengthened over the toddler, preschool and kindergarten periods. Similar relations between IC and EP were observed 12 months later, and increases in IC also predicted reductions in EP over 1 year. These data demonstrate that the preschool years are a dynamic period of developmental change in the relations between IC and EP. (Contains 1 note, 3 tables, and 2 figures.)

SN - 1522-7219, 1522-7219

UR - <http://search.proquest.com/docview/870287689?accountid=14701>

ER -

TY - JOUR

ID - 1112

T1 - The role of child negative affect in the relations between parenting styles and play. [References]

A1 - Lagace-Seguin, Daniel G.

Y1 - 2006///

N1 - Peer Reviewed Journal: 2006-08797-002

English

Journal; Peer Reviewed Journal

KW - PsycInfo

KW - Rough and Tumble

KW - Child Attitudes

KW - Childhood Play Behavior

KW - Emotional States

KW - Parent Child Relations

KW - Parenting Style

KW - Preschool Teachers

KW - Psychosocial Development

RP - NOT IN FILE

SP - Jul

EP - 477

JF - Early Child Development and Care

VL - .176

IS - 5

N2 - Interactions between parenting styles and children's negative affect in the prediction of reticent, solitary-active, and rough-and-tumble play behaviours were examined. The present study involved 98 children, their mothers and their preschool teachers. Participants (53 boys and 45 girls) were a mean age of 3.83 years (standard deviation = 0.69). Mothers completed questionnaires pertaining to their disciplinary rearing styles and

their child's negative affect. Preschool/daycare teachers completed a measure concerning children's indoor-free play behaviours. Hierarchical multiple regression analyses revealed two significant interactions between parenting styles and children's negative affect in the prediction of play behaviours. For example, it was found that emotion coaching parenting was negatively related to rough-and-tumble play for children low in negative affect but not for children high in negative affect. Implications of these findings, and others, are discussed in terms of goodness of fit, overprotective parenting and their overall importance for children's social development. (PsycINFO Database Record (c) 2013 APA, all rights reserved) (journal abstract)

SN - 0300-4430

AD - Lagace-Seguin, Daniel G.: Mount Saint Vincent University, Halifax, NS, Canada d'Entremont, Marc-Robert L.: Mount Saint Vincent University, Halifax, NS, Canada

ER -

TY - JOUR

ID - 1113

T1 - Moving Forward? Addressing the Needs of Young At-Risk Students in the Dutch Education System

A1 - Van der Aalsvoort, Geerdina M.

Y1 - 2007///

N1 - Last updated - 2012-12-14

SubjectsTermNotLitGenreText - 9939 9306 5241; 3229 6996; 5018; 5891 2877; 4723; 4109 4335; 9925 3150; 3218 5939; 4954; 7940 126; 6175 1326 3629 6582 8836; 3363 10278 8016 4542; 8130 3085 3150; 3368 3150; 10482 730; 7531 730; 8027 2392 8697

KW - Netherlands

KW - Netherlands Antilles

KW - Suriname

KW - ERIC, Current Index to Journals in Education (CIJE)

KW - Elementary Education

KW - Elementary Secondary Education

KW - Preschool Education

KW - Secondary Education

KW - Elementary School Students

KW - High Risk Students

KW - Play

KW - Special Education

KW - Inclusive Schools

KW - Educational Legislation

KW - Learning Disabilities

KW - Teacher Attitudes

KW - Longitudinal Studies

KW - Identification

KW - Educational Needs

KW - Portfolios (Background Materials)

KW - Foreign Countries

KW - Parent Attitudes

KW - Special Schools

KW - ERIC

RP - NOT IN FILE

SP - 20

JF - Childhood Education

VL - 84

IS - 1

PB - Association for Childhood Education International. 17904 Georgia Avenue Suite 215, Olney, MD 20832.

N2 - Inclusive education in the Dutch education system has achieved new meaning in the last decade or so.

Until 1998, the Netherlands recognized 19 types of special education. Then, two Educational Acts were passed, in 1998 and 2003, that decreased the types of special education by including measures to enhance inclusion of students with special educational needs in regular primary and secondary education. The authors first present information about the Dutch preschool and primary school system, followed by a description of the two laws

mentioned above. (The information applies to the Netherlands, the Netherlands Antilles, and Suriname.) They then present the main findings of three investigative studies. The first study was retrospective and it revealed teachers' and parents' views about students who had been referred to special schools in relationship to the students' portfolios. The second study was a literature search, conducted under orders of the Dutch government to clarify how identification of learning disabilities is organized in Europe and the United States. The third study was a longitudinal experimental study that included microgenetic data to analyze the social play of at-risk students taught in either regular or special primary schools

SN - 0009-4056, 0009-4056

UR - <http://search.proquest.com/docview/61932060?accountid=14701>

ER -

TY - JOUR

ID - 1114

T1 - The Microgenetic Emergence of Cooperative Play in 6-Year-Olds Developmentally At-Risk

A1 - Van der Aalsvoort, Geerdina M.

A1 - van der Leeden, Rien

Y1 - 2009///

N1 - Last updated - 2012-12-14

SubjectsTermNotLitGenreText - 7940 126; 5470; 4290; 2221 909; 5748 11228 1703 5053 2787; 10621 3227 6582; 695 694 8016 4542; 5797 11233 10789 6447; 9370 2572; 10087 2574 3629 6582; 5340 1718 10789 6447; 7146 1; 9835 10103; 3250; 8166 10789 6447; 3386 5053 2787; 7753; 3698 4542 8852 6582; 8299

KW - ERIC, Current Index to Journals in Education (CIJE)

KW - Language Tests

KW - Program Effectiveness

KW - Language Acquisition

KW - Play

KW - Gender Differences

KW - Socioeconomic Status

KW - Cooperation

KW - Personality

KW - Scores

KW - Experimental Groups

KW - Intervention

KW - Nonverbal Ability

KW - Emotional Development

KW - Pretests Posttests

KW - At Risk Students

KW - Statistical Analysis

KW - Educational Quality

KW - Intelligence Tests

KW - Teaching Methods

KW - ERIC

RP - NOT IN FILE

SP - 274

EP - 285

JF - International Journal of Educational Research

VL - 48

IS - 4

PB - Elsevier. 6277 Sea Harbor Drive, Orlando, FL 32887-4800.

N2 - Cooperative play was investigated by a controlled pre/post-test intervention design with 28 dyads of 6-year-old students developmentally at-risk. Selection was based upon cut-off scores on a language development test and a nonverbal IQ test, and same-sex pairs were matched within classrooms. Co-variables were: socio economic status, free play time in school and pedagogical quality of the classrooms. Each child was rated with respect to temperament. Play session 1 served as pretest for both research conditions. Then five play sessions of 20 min within 3 weeks took place in the experimental condition. Eight weeks after session 6 a play session took place in both research conditions serving as post-test. After microgenetic analyses of the data, ANCOVA's were

computed of time played in collaboration, and proportion of pretend play and of deep collaboration. The results revealed that the level of collaboration had improved dramatically in the experimental condition only. Moreover, the findings showed that the length of time dyads spent cooperating, and how deeply they collaborated on tasks, was related to how agreeable and emotionally stable they were. Gender effects also came forward. No long-term intervention effects were found. (Contains 8 tables and 1 figure.)

SN - 0883-0355, 0883-0355

UR - <http://search.proquest.com/docview/742861322?accountid=14701>

ER -

TY - JOUR

ID - 1115

T1 - Phonological Development in Very-Low-Birthweight Children: An Exploratory Study

A1 - Van Noort-Van Der Spek, Inge

A1 - Franken, Marie Christine

A1 - Wieringa, Marjan H.

A1 - Weisglas-Kuperus, Nynke

Y1 - 2010/06//

N1 - Last updated - 2012-12-14

SubjectsTermNotLitGenreText - 7825 6089 9804 9351 5964; 8112 5118 11655 1474 316 8016 4542; 1096 7843 5051; 694 8016 4542; 9970 2877; 1443 5053 2787; 1955 3629 6582; 7940 126; 6823 3932 8016 4542 7577 3816; 7537 3851 5449 8768; 5348 8768; 1703 5053 2787; 8426 9690 1; 5748 11228 1703 5053 2787; 9977 753 5792 9690 1; 7822 5792 9690 1

KW - Mean Length of Utterance

KW - ERIC, Current Index to Journals in Education (CIJE)

KW - Interaction

KW - At Risk Persons

KW - Language Acquisition

KW - Cognitive Development

KW - Play

KW - Speech Impairments

KW - Mothers

KW - Phonology

KW - Body Weight

KW - Comparative Analysis

KW - Phonological Awareness

KW - Speech Skills

KW - Parent Child Relationship

KW - Premature Infants

KW - Child Development

KW - Psychomotor Skills

KW - ERIC

RP - NOT IN FILE

SP - 541

EP - 546

JF - Developmental Medicine & Child Neurology

JA - Dev. Med Child Neurol.

VL - 52

IS - 6

PB - Wiley-Blackwell. 350 Main Street, Malden, MA 02148.

N2 - Aim: Very-low-birthweight (VLBW; birthweight less than 1500g and/or gestational age less than 32wks) children are at risk for speech problems. However, there are few studies on speech development in VLBW children at an early age. The aim of this study was to investigate phonological development in 2-year-old VLBW children. Method: Twenty VLBW children without major neurosensory impairment (7 males, 13 females; mean birthweight 971g, SD 315; mean gestational age 28wks, SD 1.81) and 20 term children (7 males, 13 females; mean birthweight 3503g, SD 416; mean gestational age 40wks, SD 1.26) were compared on measures of phonological development derived from 20-minute spontaneous speech samples of standardized

mother-child play interaction as well as on standardized tests of cognitive and psychomotor development, language, and behaviour. Results: VLBW children had significantly fewer acquired consonants (median 9,  $p = 0.02$ ) and a significantly lower phonological mean length of utterance (pMLU; median 4.1,  $p$  less than 0.01) than term children (median acquired consonants 10, median pMLU 5.0). Interpretation: This study provides evidence for poor phonological development in even healthy VLBW children, compared with term-matched children, independent of their cognitive, psychomotor, and language development, and their behavioural functioning

SN - 0012-1622, 0012-1622

UR - <http://search.proquest.com/docview/742872333?accountid=14701>

ER -

TY - JOUR

ID - 1116

T1 - "Memories Are Made of This": Some Reflections on Outdoor Learning and Recall

A1 - Waite,Sue

Y1 - 2007/11//

N1 - Last updated - 2012-12-14

SubjectsTermNotLitGenreText - 7458 3150; 4109 4335; 3365 10591 8267 3417 8016 4542 5703 4908 8917; 3363 10278 8016 4542; 6519 1710; 1326 3629 6582 8836; 7747 8824 8477; 3250; 8135 10591 8267 3417 8016 4542 5703 4908 8917; 10380 3629 6582; 1433 9806 4911 9556; 5449 8768; 7940 126; 8996; 3692 5882; 9529 3685 853; 3395 8930 909; 226 316 8016 4542; 1474 316 8016 4542

KW - United Kingdom

KW - England

KW - ERIC,Current Index to Journals in Education (CIJE)

KW - Practitioners

KW - Elementary Education

KW - Preschool Teachers

KW - Elementary School Students

KW - Play

KW - Case Studies

KW - SURVEYS

KW - Child Care

KW - Adults

KW - Elementary School Teachers

KW - CHILDREN

KW - Sensory Experience

KW - Risk

KW - Memory

KW - Foreign Countries

KW - Experiential Learning

KW - Personal Narratives

KW - Emotional Response

KW - Interpersonal Relationship

KW - Outdoor Education

KW - Educational Quality

KW - ERIC

RP - NOT IN FILE

SP - 333

EP - 347

JF - Education 3-13

VL - 35

IS - 4

PB - Routledge. , 325 Chestnut Street Suite 800, Philadelphia, PA 19106.

N2 - Potential benefits for learning that the outdoors may hold have been brought into increased focus in the UK by the recent introduction of a manifesto for learning outside the classroom (DfES, "Learning outside the classroom: manifesto"; Nottingham, Department for Education and Skills, 2006). This article draws on two

recent studies of outdoor learning practices--a survey of 334 practitioners with children aged between 2 and 11, and a case study in a primary school in the West of England. The survey asked practitioners about their memories of outdoor experiences, and in the case study, the children talk of what they remember of their learning outdoors. With reference to relevant literature, the article reflects on how the quality of outdoor experience may sustain and support engagement and memory. (Contains 1 table and 1 note.)

SN - 0300-4279, 0300-4279

UR - <http://search.proquest.com/docview/61899049?accountid=14701>

ER -

TY - GEN

ID - 1117

T1 - Harvard Education Letter. Volume 28, Number 1, January-February 2012

A1 - Walser,Nancy

Y1 - 2012///

N1 - Last updated - 2012-12-14

KW - ERIC,Resources in Education (RIE)

KW - Elementary Secondary Education

KW - Program Effectiveness

KW - Play

KW - Pervasive Developmental Disorders

KW - School Culture

KW - Moral Development

KW - Skill Development

KW - At Risk Students

KW - Educational Environment

KW - Educational Games

KW - Interpersonal Competence

KW - Theater Arts

KW - Social Development

KW - Moral Values

KW - Autism

KW - Drama

KW - ERIC

RP - NOT IN FILE

SP - 8

PB - Harvard Education Press. 8 Story Street First Floor, Cambridge, MA 02138.

N2 - "Harvard Education Letter" is published bimonthly at the Harvard Graduate School of Education. This issue of "Harvard Education Letter" contains the following articles: (1) Using Theater to Teach Social Skills: Researchers Document Improvements for Children with Autism (Patti Hartigan); (2) The Family Model of Schooling Revisited: Few Teachers, Big Groups, and Lots of Flexibility (Ann Doss Helms); and (3) Promoting Moral Development in Schools (Richard Weissbourd)

UR - <http://search.proquest.com/docview/964185289?accountid=14701>

ER -

TY - JOUR

ID - 1118

T1 - Rough-and-tumble play: II: On the importance of providing boys with sufficient space to be boys.

[Norwegian]. [References]

A1 - Eide-Midsand,Nils

Y1 - 2007///

N1 - Peer Reviewed Journal: 2007-20035-002

Norwegian

Journal; Peer Reviewed Journal

KW - PsycInfo

KW - Rough and Tumble

KW - Childhood Play Behavior

KW - Human Males

KW - Child Psychotherapy

KW - Personality Correlates

RP - NOT IN FILE

SP - Dec

EP - 1474

JF - Tidsskrift for Norsk Psykologforening

VL - .44

IS - 12

N2 - The author explores the possibility that contemporary society moves in directions that make it increasingly difficult for boys to adjust. Gender differences in brain biology and behavioural predispositions make boys play and learn in different ways than girls. Like young males of other mammalian species boys are more prone to impulsivity, movement and rough-and-tumble play--a form of play that appears to boost maturational processes in their brain, but that is often misjudged as "bad behaviour" and discouraged. It seems that boys' natural ways are being increasingly pathologised, and that the epidemic of ADHD might well be regarded as a specific manifestation of this process. Also, boys may need other forms of therapy than do girls. (PsycINFO Database Record (c) 2012 APA, all rights reserved) (journal abstract)

SN - 0332-6470

AD - Eide-Midsand, Nils: Avdeling for barn og ungdoms psykiske helse, Poliklinikken Sorlandet Sykehus HF, Kristiansand, Norway

ER -

TY - JOUR

ID - 1119

T1 - Rough-and-tumble play: Its functions in psychotherapy and in the mental development of children.

[Norwegian]. [References]

A1 - Eide-Midsand,Nils

Y1 - 2007///

N1 - Peer Reviewed Journal: 2007-20035-001

Norwegian

Journal; Peer Reviewed Journal

KW - PsycInfo

KW - Rough and Tumble

KW - Child Psychotherapy

KW - Childhood Development

KW - Childhood Play Behavior

KW - Cognitive Development

KW - Human Males

KW - Brain

KW - Trauma

RP - NOT IN FILE

SP - Dec

EP - 1466

JF - Tidsskrift for Norsk Psykologforening

VL - .44

IS - 12

N2 - Deprived and severely traumatised boys in psychotherapy often choose to express themselves through physical activities rather than words. They typically want to play roughhouse, and especially to play fight with the therapist. For various reasons the boys are often excluded from the normal rough-and-tumble play with other children. Excerpts from the therapy of a nine year old is presented, and illustrated with findings from the fields of psychology and brain research. It is suggested that rough-and-tumble play serves to further the development of regulatory brain mechanisms, essentially of the same kind as aimed at by play in psychotherapy. (PsycINFO Database Record (c) 2012 APA, all rights reserved) (journal abstract)

SN - 0332-6470

AD - Eide-Midsand, Nils: Avdeling for barn og ungdoms psykiske helse, Poliklinikken Sorlandet sykehus HF, Kristiansand, Norway



ER -

TY - JOUR

ID - 1120

T1 - Ten Ways to Restrict Children's Freedom to Play: The Problem of Surplus Safety

A1 - Wyver, Shirley

A1 - Tranter, Paul

A1 - Naughton, Geraldine

A1 - Little, Helen

A1 - Sandseter, Ellen Beate Hansen

A1 - Bundy, Anita

Y1 - 2010///

N1 - Last updated - 2012-12-14

SubjectsTermNotLitGenreText - 7940 126; 9074; 11655 1474 316 8016 4542; 7943 8704 3760; 4109 4335; 3899 8415; 8996; 1955 3629 6582; 1443 5053 2787; 4185; 5183 2877; 3085 3150

KW - Australia

KW - Norway

KW - ERIC, Current Index to Journals in Education (CIJE)

KW - Early Childhood Education

KW - Play

KW - Injuries

KW - Young Children

KW - Fear

KW - Safety

KW - Comparative Analysis

KW - Risk

KW - Foreign Countries

KW - Playgrounds

KW - Child Development

KW - Freedom

KW - ERIC

RP - NOT IN FILE

SP - 263

EP - 277

JF - Contemporary Issues in Early Childhood

VL - 11

IS - 3

PB - Symposium Journals. P.O. Box 204, Didcot, Oxford, OX11 9ZQ, UK. Tel: +44-1235-818-062; Fax: +44-1235-817-275; e-mail: [subscriptions@symposium-journals.co.uk](mailto:subscriptions@symposium-journals.co.uk); Web site: <http://www.wwwwords.co.uk/ciec>

N2 - Play and playgrounds provide essential experiences for young children's growth, development and enjoyment of life. However, such play experiences are now limited for many children due to excessive fear of risk, or "surplus safety". In this article, the authors examine the pervasiveness of surplus safety in the lives of young children. They argue that restrictions now imposed on children's play to promote safety may, paradoxically, expose children to more serious short and longer term threats of illness and limit children's life opportunities. By comparing experiences from Australia and Norway, the authors demonstrate that surplus safety is not a necessary outcome of living in a modern Western society

SN - 1463-9491, 1463-9491

UR - <http://search.proquest.com/docview/815959686?accountid=14701>

ER -

TY - JOUR

ID - 1121

T1 - The Power of Play: A Literature-based after School Sports Program for Urban Youth

A1 - Zierk, Tom

Y1 - 2000///

N1 - Last updated - 2012-12-14

SubjectsTermNotLitGenreText - After School Programs 309 8331; Athletics 704 7840 126; 1443 5053 2787; 3368 3150; 4723; 5446 1970 1; Literacy 6101; Literature 6120 4918 5964; Play 7940 126; 8661 8623 11225 1 5792 9690; 11635 11615 11225 1 5792 9690; Youth Programs 11666 8331

KW - ERIC,Current Index to Journals in Education (CIJE)

KW - Elementary Secondary Education

KW - Athletics

KW - High Risk Students

KW - Play

KW - Literature

KW - After School Programs

KW - Writing Skills

KW - Reading Skills

KW - Youth Programs

KW - Interpersonal Competence

KW - Child Development

KW - Literacy

KW - ERIC

RP - NOT IN FILE

SP - 12

EP - 17

JF - Afterschool Matters

VL - 1

IS - 1

PB - Afterschool Matters, c/o Children & the Classics, 114 W. 17th St., Suite 3R, New York, NY 10011;

N2 - A program that combines sports and literature can improve students' reading, writing, and comprehension skills, promoting links between children's personal development and self-esteem and forging links between sports, literature, and daily life. Describes one such program, Sports PLUS After School, noting: program goals, components, and structure; teachers as coaches; support components; and a typical week. (SM)

UR - <http://search.proquest.com/docview/62342723?accountid=14701>

ER -

TY - BOOK

ID - 1122

T1 - Annual report, 1970-71

Y1 - 1971///

N1 - Accession Number: SPH335981; Corporate Author: Children's Research Center. Motor Performance and Play Research Laboratory; Language: English; Description: 24 P.; Database Subset: SIRLS Database; Publication Type: Monograph or government document; Update Code: 19940101

KW - \*CONTESTS

KW - \*MOTIVATION (Psychology)

KW - \*ACHIEVEMENT

KW - \*PLAY

KW - \*PSYCHOLOGY

KW - \*RISK-taking (Psychology)

KW - Anxiety

KW - BIBLIOGRAPHY

KW - ABILITY

KW - CHILDREN

KW - SOCIAL psychology

KW - Social Support

KW - COACTION

KW - REVIEW

KW - SportDiscus

KW - Rough and Tumble

RP - NOT IN FILE

CY - Urbana, Illinois; United States

PB - University of Illinois. Motor Performance and Play Research Laboratory.

N2 - Contains abstracts of reports written by individuals at the Motor Performance and Research Laboratory

UR -

<https://login.proxy.bib.uottawa.ca/login?url=http://search.ebscohost.com/login.aspx?direct=true&db=s3h&AN=SPH335981&site=ehost-live>

ER -

TY - JOUR

ID - 1123

T1 - Clearing the Air

A1 - Attwood,Emily

Y1 - 2012/06//

N1 - Accession Number: 76921521; Author: Attwood, Emily email: emily@athleticbusiness.com. ; No. of Pages: 2; Language: English; Publication Type: Journal Article; Update Code: 20120620

KW - \*PARKS

KW - \*PLAYGROUNDS

KW - \*PASSIVE smoking

KW - SMOKING policy

KW - NONSMOKING areas

KW - CIVIC leaders

KW - United States

KW - SportDiscus

RP - NOT IN FILE

SP - 185

EP - 186

JA - Athletic Business

VL - 36

IS - 6

N2 - The article reports on the move of parks and playgrounds in the U.S. to ban smoking. According to the Americans for Nonsmokers' Rights Association, more than 600 communities have implemented smoking bans in parks. They made the decision in response to the dangers of secondhand smoke in outdoor areas. Several programs have been launched to educate community leaders about the risks of tobacco use in parks and playground areas

SN - 0747315X

UR -

<https://login.proxy.bib.uottawa.ca/login?url=http://search.ebscohost.com/login.aspx?direct=true&db=s3h&AN=76921521&site=ehost-live>

ER -

TY - JOUR

ID - 1124

T1 - ARSENIC AND YOUR PLAYGROUND

A1 - Dolesh,Richard J.

Y1 - 2004/04//

N1 - Accession Number: 12860750; Author: Dolesh, Richard J.: 1 email: rdolesh@nrpa.org. ; Author Affiliation: 1 Senior Policy Associate, National Recreation and Park Association's Public Policy Office; No. of Pages: 6; Language: English; Publication Type: Journal Article; Update Code: 20040421

KW - \*PARKS

KW - \*PLAYGROUNDS

KW - WOOD preservatives

KW - ARSENIC

KW - ASSOCIATIONS,institutions,etc.

KW - United States

KW - SportDiscus

RP - NOT IN FILE

SP - 61

EP - 67

JA - Parks & Recreation

VL - 39

IS - 4

N2 - Reveals that the 2004 voluntary phase-out of arsenic-treated wood is giving park and recreation departments in the U.S. new reason to evaluate their parks. Definition of chromated copper arsenate; Information on the Environmental Working Group's 2001 report entitled "Poisoned Playgrounds"; Elements to consider in assessing risks and developing agency policies

SN - 00312215

UR -

<https://login.proxy.bib.uottawa.ca/login?url=http://search.ebscohost.com/login.aspx?direct=true&db=s3h&AN=12860750&site=ehost-live>

ER -

TY - JOUR

ID - 1125

T1 - Learning to teach science as inquiry in the rough and tumble of practice. [References]

A1 - Crawford, Barbara A.

Y1 - 2007///

N1 - Peer Reviewed Journal: 2007-05352-005

English

Journal; Peer Reviewed Journal

KW - PsycInfo

KW - Rough and Tumble

KW - Science Education

KW - Teacher Education

KW - Teaching

KW - Attitudes

KW - Classrooms

KW - Energy Expenditure

KW - Knowledge Level

RP - NOT IN FILE

SP - Apr

EP - 642

JF - Journal of Research in Science Teaching

VL - .44

IS - 4

N2 - This study examined the knowledge, beliefs and efforts of five prospective teachers to enact teaching science as inquiry, over the course of a one-year high school fieldwork experience. Data sources included interviews, field notes, and artifacts, as these prospective teachers engaged in learning how to teach science. Research questions included 1) What were these prospective teachers' beliefs of teaching science? 2) To what extent did these prospective teachers articulate understandings of teaching science as inquiry? 3) In what ways, if any, did these prospective teachers endeavor to teach science as inquiry in their classrooms? 4) In what ways did the mentor teachers' views of teaching science appear to support or constrain these prospective teachers' intentions and abilities to teach science as inquiry? Despite support from a professional development school setting, the Interns' teaching strategies represented an entire spectrum of practice--from traditional, lecture-driven lessons, to innovative, open, full-inquiry projects. Evidence suggests one of the critical factors influencing a prospective teacher's intentions and abilities to teach science as inquiry, is the teacher's complex set of personal beliefs about teaching and of science. This paper explores the methodological issues in examining teachers' beliefs and knowledge in actual classroom practice. (PsycINFO Database Record (c) 2012 APA, all rights reserved) (journal abstract)

SN - 0022-4308

AD - Crawford, Barbara A.: Department of Education, Cornell University, Ithaca, NY, US

ER -

TY - JOUR

ID - 1126

T1 - DOES HEIGHT MATTER?

A1 - Frost,Joe

A1 - Sutterby,John

A1 - Therrell,Jim

A1 - Brown,Pei San

A1 - Thornton,Candra

Y1 - 2002/05//

N1 - Accession Number: 6554089; Author: Frost, Joe Author: Sutterby, John Author: Therrell, Jim Author: Brown, Pei-San Author: Thornton, Candra ; No. of Pages: 9; Language: English; Publication Type: Journal Article; Update Code: 20020426

KW - \*PLAYGROUNDS

KW - \*EQUIPMENT & supplies

KW - \*FALLS (Accidents)

KW - SAFETY measures

KW - United States

KW - SportDiscus

RP - NOT IN FILE

SP - 74

JA - Parks & Recreation

VL - 37

IS - 5

N2 - Discusses the risks of the designed fall height of several playground equipment in the U.S. Benefits of climbing for children; Details of the national guidelines and standards for heights and surfacing in the U.S.; Recommended fall height of climbing equipment and slides in the country; Factors which affect the potential injury resulting from falls; Discussion on playground safety

SN - 00312215

UR -

<https://login.proxy.bib.uottawa.ca/login?url=http://search.ebscohost.com/login.aspx?direct=true&db=s3h&AN=6554089&site=ehost-live>

ER -

TY - JOUR

ID - 1127

T1 - The Game Structure as a Critical Component in Life

A1 - Glassford,R.G.

Y1 - 1975///

N1 - Accession Number: SPH332353; Author: Glassford, R.G. ; Language: English; References: 18; Database Subset: SIRLS Database; Publication Type: Journal article; Update Code: 19940101; SIRC Article No.: 332353

KW - \*GAMES

KW - \*LIFESTYLES

KW - \*PLAY

KW - Child Development

KW - SOCIALIZATION

KW - STRATEGY

KW - SportDiscus

RP - NOT IN FILE

SP - 3

JA - Katimavik

VL - 2

IS - 4

N2 - Discusses the concept of play and games as part of the great game' of life Games involving choice pathways, strategies, rules, goals, risks and trade-offs are considered to have a strong element in our culture. Considers the influence of unstructured play and rule-governed games on the development of young children

UR -

<https://login.proxy.bib.uottawa.ca/login?url=http://search.ebscohost.com/login.aspx?direct=true&db=s3h&AN=SPH332353&site=ehost-live>;<http://articles.sirc.ca/search.cfm?id=332353>

ER -

TY - JOUR

ID - 1128

T1 - Playing with Safety?

A1 - Johnston, Kevin

A1 - Bruya, Lawrence

A1 - Schappet, Jean

Y1 - 2004/09//

N1 - Accession Number: SPS-1013666; Author: Johnston, Kevin Author: Bruya, Lawrence Author: Schappet, Jean ; No. of Pages: 1; Language: English; Parent Item: SPHP6376; General Notes: Perspectives.; Database Subset: Recreation and Leisure; Publication Type: Journal article; Material Type: PRINT; Update Code: 20060501; SIRC Article No.: S-1013666

KW - \*WATER

KW - \*PLAYGROUNDS

KW - \*SAFETY

KW - standards

KW - AMERICAN Society for Testing & Materials

KW - SportDiscus

RP - NOT IN FILE

SP - 16

EP - 16

JA - Aquatics International

VL - 16

IS - 8

CY - United States

N2 - This article argues that the safety standards for water playgrounds being proposed by the ASTM (American Society for Testing & Materials) are not adequate, and do not take account of the special risks posed by this kind of play environment

SN - 10587039

UR -

<https://login.proxy.bib.uottawa.ca/login?url=http://search.ebscohost.com/login.aspx?direct=true&db=s3h&AN=SPHS-1013666&site=ehost-live>;<http://articles.sirc.ca/search.cfm?id=S-1013666>;<http://www.hanley-wood.com/>

ER -

TY - JOUR

ID - 1129

T1 - Evolutionary Foundations and Functions of Play: An Overview. [References]

A1 - Smith, Peter K.

Y1 - 2006///

N1 - Book: 2007-04529-002

English

Book; Edited Book

KW - PsycInfo

KW - Rough and Tumble

KW - Childhood Play Behavior

KW - Childhood Play Development

KW - Theory of Evolution

KW - History

KW - Pretend Play

RP - NOT IN FILE

SP - sociocultural, and

EP - 49

JF - Goncu, Artin [Ed]; Gaskins, Suzanne [Ed]

IS - 2006

N2 - (from the chapter) In this chapter I give an overview of how evolutionary theory has impacted the study of children's play. There have been distinct ups and downs in this influence since evolutionary theory originated, and I start with a historical account of this. I also mention the play ethos that influenced much research in the 20th century. I delineate what I regard as four important characteristics of an evolutionary approach, useful at the present time. I then discuss the relevance of such an approach to the main forms of play--physical activity and rough-and-tumble play, object play, and pretend and sociodramatic play. I take the opportunity to cross-refer to the following chapters by Mitchell (chap. 3, this volume, record 2007-04529-003), and Pellegrini (chap. 4, this volume, record 2007-04529-004), where appropriate. I end with a brief discussion of genetic and cultural evolution and of future directions in this field. (PsycINFO Database Record (c) 2012 APA, all rights reserved)

AD - Smith, Peter K.: Department of Psychology, Goldsmiths College, University of London, London, England

ER -

TY - JOUR

ID - 1130

T1 - Play and development: Evolutionary, sociocultural, and functional perspectives

A1 - Goncu, Artin

Y1 - 2006//

N1 - Book: 2007-04529-000

English

Book; Edited Book

(Created by PsycINFO) Preface List of contributors I. Introduction \* An Integrative Perspective on Play and Development / Artin Goncu and Suzanne Gaskins / 3-17 II. Biological/ethological perspectives of play and development \* Evolutionary Foundations and Functions of Play: An Overview / Peter K. Smith / 21-49 \* Pretense in Animals: The Continuing Relevance of Children's Pretense / Robert W. Mitchell / 51-75 \* The Development and Function of Rough-and-Tumble Play in Childhood and Adolescence: A Sexual Selection Theory Perspective / Anthony D. Pellegrini / 77-98 III. Social/cultural perspectives of play and development \* On the Significance of Social Relationships in the Development of Children's Earliest Symbolic Play: An Ecological Perspective / Marc H. Bornstein / 101-129 \* Guided Participation: How Mothers Structure and Children Understand Pretend Play / Angeline Lillard / 131-153 \* Children's Play as Cultural Interpretation / Artin Goncu, Jyoti Jain, and Ute Tuermer / 155-178 \* The Cultural Construction of Play / Suzanne Gaskins, Wendy Haight, and David F. Lancy / 179-202 IV. Applied perspectives of play and development \* Hard Work for the Imagination / Paul L. Harris / 205-225 \* Of Hobbes and Harvey: The Imaginary Companions Created by Children and Adults / Marjorie Taylor and Anne M. Mannering / 227-245 \* The Interplay of Play and Narrative in Children's Development: Theoretical Reflections and Concrete Examples / Ageliki Nicolopoulou / 247-273 \* Therapeutic Advantages of Play / Cindy Dell Clark / 275-293 Author index Subject index

KW - PsycInfo

KW - Rough and Tumble

KW - Childhood Play Behavior

KW - Childhood Play Development

KW - Evolutionary Psychology

KW - Sociocultural Factors

KW - Imagination

RP - NOT IN FILE

SP - sociocultural, and

JF - (2006)

VL - Play and development

N2 - (from the cover) Children's play is a universal human activity, and one that serves a significant purpose in personal development. Throughout this volume, the editors and contributors explore assumptions about play and its status as a unique and universal activity in humans. As a whole, Play and Development delves into three lines of research concerning this topic: examining these assumptions from an ethological perspective, exploring the view of research that shows play to be socially and culturally constructed, and looking at varied applications of play in the different contexts of childhood. Topics covered in this volume include: (a) evolutionary foundations and functions of play; (b) children's play as cultural interpretation; (c) the use of imagination in children's play; and (d) the imaginary companions created by children and adults. This volume will be of interest to scholars and

researchers in the fields of developmental psychology and cognitive development, and will be sought out by active researchers and practitioners in the field. (PsycINFO Database Record (c) 2012 APA, all rights reserved)  
AD - Goncu, Artin: College of Education, University of Illinois at Chicago, Chicago, IL, US Gaskins, Suzanne: Department of Psychology, Northeastern Illinois University, Chicago, IL, US  
ER -

TY - JOUR

ID - 1131

T1 - Young children's rough and tumble play: An exploratory study

A1 - Tannock,Michelle Therese

Y1 - 2006///

N1 - Dissertation Abstract: 2006-99021-102

English

Dissertation Abstract

KW - PsycInfo

KW - Rough and Tumble

KW - Childhood Development

KW - Childhood Play Behavior

KW - Parents

KW - Teachers

RP - NOT IN FILE

SP - 1645

JF - Dissertation Abstracts International Section A: Humanities and Social Sciences

VL - .67

IS - 5-A

N2 - This study explores, through observations and interviews, the rough and tumble play of young children in early childhood settings. The purpose of this study was to gain an understanding of how early childhood educators, parents, and young children interpret rough and tumble play. The study also identified the extent to which rough and tumble play is included or not included within early childhood settings. Participants in this study included 11 educators, 16 parents, and 16 children from four settings. Observations of the play of children and the responses of the educators to rough and tumble play were made at two settings. During 30:25 hours of observation, 110 incidents of rough and tumble play were recorded. Twenty-seven distinct rough and tumble play behaviours were exhibited during the observation period. Behaviours included components that had been identified as rough and tumble play in previous research and also additional behaviours that were not previously identified as elements of rough and tumble play. Results of the interviews of adults indicate that there is perceived value in rough and tumble play; the play needs to be supervised; the play is more acceptable at home rather than at daycare; adults are unaware of formal policies or guidelines for the play; and adults reject the notion that the play may be linked to aggressive behaviour. Results of the interviews with children indicate that adults place restrictions on the play; it is important that no one is hurt; there are gender differences; and while all the children were observed engaged in the play, 60% of the children stated that they do not engage in rough and tumble play at daycare. The results of this study will have implications for the understanding of child development. It may be that rough and tumble play evolves as children age; that children move into more, or less, complex play behaviours as they mature. This study might also have implications for early childhood education. The parents and educators conceded a lack of knowledge about rough and tumble play. This finding highlights the need for the development of teacher and parent education resources. (PsycINFO Database Record (c) 2012 APA, all rights reserved)

SN - 0419-4209

AD - Tannock, Michelle Therese: U Victoria, Canada

ER -

TY - JOUR

ID - 1132

T1 - Playground without risks would not interest children

A1 - Munch,A.

Y1 - 1979/11//



N1 - Accession Number: SPH70656; Author: Munch, A. ; Language: English; Database Subset: Recreation and Leisure; Publication Type: Journal article; Update Code: 19940901; SIRC Article No.: 70656

KW - \*PLAYGROUNDS

KW - \*SAFETY

KW - \*EQUIPMENT & supplies

KW - CHILDREN

KW - LIABILITY

KW - SportDiscus

RP - NOT IN FILE

SP - 12

JA - Leisure Forum

VL - 6

IS - 5

CY - Canada

SN - 0704643X

UR -

<https://login.proxy.bib.uottawa.ca/login?url=http://search.ebscohost.com/login.aspx?direct=true&db=s3h&AN=SPH70656&site=ehost-live;http://articles.sirc.ca/search.cfm?id=70656>

ER -

TY - JOUR

ID - 1133

T1 - Harvard, soccer & over-scheduled families

A1 - Rosenfeld,A.

Y1 - 2004/03//

N1 - Accession Number: SPHS-944832; Author: Rosenfeld, A. ; No. of Pages: 4; Language: English; Parent Item: SPHP95851; References: 15; Database Subset: Indexing Partner Contribution; Publication Type: Journal article; Update Code: 20040701

KW - \*COACHING (Athletics)

KW - \*PLAY

KW - CHILDREN

KW - Child Rearing

KW - PARENT & child

KW - United States

KW - SportDiscus

RP - NOT IN FILE

SP - 15

EP - 18

JA - Youth Studies Australia

VL - 23

IS - 1

CY - Australia

N2 - The over-scheduled child-rearing style is currently being touted in the USA and in much of the rest of the developed world as the best way to raise children. However, this over-scheduled lifestyle may be damaging marriages; getting unhappy children diagnosed as learning disabled, ADD, bipolar and depressed; and causing adolescents to be involved with drugs, alcohol and premature sex (Luthar & Becker 2002). Renowned American child and adolescent psychiatrist Alvin Rosenfeld points out that the dangers and risks to children of this intensive lifestyle are known, but, he asks, "Is anyone listening"

SN - 10382569

UR -

<https://login.proxy.bib.uottawa.ca/login?url=http://search.ebscohost.com/login.aspx?direct=true&db=s3h&AN=SPHS-944832&site=ehost-live>

ER -

TY - JOUR

ID - 1134

T1 - Preschool teachers' exposure to classroom noise. [References]

A1 - Grebennikov, Leonid

Y1 - 2006///

N1 - Peer Reviewed Journal: 2006-02675-003

English

Journal; Peer Reviewed Journal

KW - PsycInfo

KW - Rough and Tumble

KW - Noise Effects

KW - Noise Levels (Work Areas)

KW - Preschool Teachers

KW - Classroom Behavior

RP - NOT IN FILE

SP - Mar

EP - 44

JA - International Journal of Early Years Education

VL - .14

IS - 1

N2 - This research examined exposure to classroom noise of 25 full-time teaching staff in 14 preschool settings located across Western Sydney. The results indicated that one teacher exceeded the maximum permissible level of daily noise exposure for employees under the health and safety legislation. Three staff approached this level and 92% of teachers were subjected to daily noise exposure which, if occurs repeatedly, is considered potentially harmful. Nine staff recorded peak noise rates in excess of the permitted limit. High levels of noise were evident when large numbers of students were located in confined areas, when they were involved in rough play or were distressed, when the students dropped heavy play equipment, and during music sessions. Further research on noise in early educational settings across different nations appears to be valuable for understanding both the scope of the problem and possible remedies. (PsycINFO Database Record (c) 2012 APA, all rights reserved) (journal abstract)

SN - 0966-9760

AD - Grebennikov, Leonid: University of Western Sydney, NSW, Australia

ER -

TY - JOUR

ID - 1135

T1 - APRENDIZAJE, JUEGO Y NINO: UN MODO DE ENTENDER LA EDUCACION FISICA. /

Aprendizagem, jogo e crianca: um modo de entender a Educacao Fisica. / Learning, playing and children. A way to understand Physical Education

A1 - Rozengardt, Rodolfo

Y1 - 2005/05//

N1 - Accession Number: SPHS-999199; Author: Rozengardt, Rodolfo: 1 email: rozencar@ciudad.com.ar. ; Author Affiliation: 1 Maestrando en Metodologia de la Investigacion Cientifica. Rector del Instituto Superior de Educacion Fisica de La Pampa, Argentina Editor de la revista Educacion Fisica y Deportes, Papeles de investigacion; No. of Pages: 16; Language: Spanish; Parent Item: SPHP2646; References: 19; Publication Type: Journal article; Material Type: PRINT; Update Code: 20051201; SIRC Article No.: S-999199

KW - \*PHYSICAL education & training

KW - \*TEACHING

KW - \*PLAY

KW - CHILDREN

KW - Learning

KW - PHILOSOPHY

KW - SportDiscus

RP - NOT IN FILE

SP - 111

EP - 126

JA - Revista Brasileira de Ciencias do Esporte

VL - 26

IS - 3

CY - Brazil

N2 - As Physical Education teachers, we conduct our daily work in reference to what we understand teaching may be, what we think the result of our work might be, and who the subjects with whom we interact may be and do. These frames of reference are historically constructed, and each of us continues to create and recreate them in our interactions with others, i.e., our social experience. Our teaching practice with young students also influences our capacity to maintain and change the prevailing values about who we think children are, and what they deserve in school and other contexts of institutional corporal practice. This work is an alert to the present risks involved in the fragmentation of childhood images, pointing out to a concept of corporal subject, and rescues the need to preserve the richness and potentiality of the world of the children by appreciating play and creative learning. Physical Education for children could be based on a pleasurable lively teaching without abandoning the focus on content. [ABSTRACT FROM AUTHOR]

En la tarea cotidiana con niños, los profesores de Educación Física actuamos animados por representaciones acerca de lo que enseñamos, los efectos de nuestras intervenciones de los sujetos con los que interactuamos. Esas imágenes se han conformado históricamente y cada uno de nosotros las elabora en una experiencia social. Nuestra propia práctica con niños incide en el mantenimiento o cambio de los valores dominantes acerca lo que los niños son y merecen recibir en un contexto de práctica corporal institucional. En el siguiente trabajo se advierte sobre los peligros actuales en torno a la fragmentación la imagen de la infancia, destacando una concepción de sujeto corporal y se rescata la necesidad de defender el mundo infantil en su riqueza y potencialidad mediante el valor del juego y el aprendizaje creativo. La Educación Física con niños podría sostenerse sobre un modo lúdico de enseñanza, sin abandonar la centralidad otorgada al contenido.

[ABSTRACT FROM AUTHOR]

SN - 01013289

UR -

<https://login.proxy.bib.uottawa.ca/login?url=http://search.ebscohost.com/login.aspx?direct=true&db=s3h&AN=SPHS-999199&site=ehost-live>; <http://articles.sirc.ca/search.cfm?id=S-999199>

ER -

TY - JOUR

ID - 1136

T1 - The riskiness of the playground

A1 - Smith,S.J.

Y1 - 1990/08//

N1 - Accession Number: SPH383596; Author: Smith, S.J. ; No. of Pages: 17; Language: English; Parent Item: SPHP968538; References: 38; Database Subset: Recreation and Leisure; Publication Type: Journal article; Update Code: 19951101; SIRC Article No.: 383596

KW - \*PLAYGROUNDS

KW - \*PLAY

KW - \*SAFETY

KW - \*EQUIPMENT &amp; supplies

KW - CHILDREN

KW - Risk

KW - DESIGN

KW - SportDiscus

RP - NOT IN FILE

SP - 71

EP - 87

JA - Journal of Educational Thought

VL - 24

IS - 2

CY - Canada

N2 - Risk is described, not as a negative attribute of children's playground activity, but more positively, as challenge and adventure to which children can actively respond. Risk refers to something that is being accomplished by children, some intended activity which expands their sense of the world. Such a positive sense of risk is developed by showing that the riskiness of the playground is a reflection of our concerns for the safety of children and their proper supervision. I describe, in particular, how we might observe children closely and

how we might take responsibility for the risky situations in which children find themselves. In so doing, I present a way of understanding how we can bring an underlying sense of security to children's feelings for the playground and for the risks that can be taken there

Les activités des enfants, surtout sur les terrains de jeux, comportent un facteur de risque. C'est ce qui justifie, chez l'adulte responsable, la préoccupation pour la sécurité des enfants. Pourtant, du point de vue des enfants, la situation de risque peut être une occasion d'apprendre à relever des défis, de goûter l'aventure et de s'ouvrir sur le monde. Pour que les enfants puissent profiter des activités des terrains de jeux, il faut trouver les moyens de leur fournir la surveillance qui leur assurera la sécurité dont ils ont besoin pour risquer de s'aventurer dans le monde

SN - 00220701

UR -

<https://login.proxy.bib.uottawa.ca/login?url=http://search.ebscohost.com/login.aspx?direct=true&db=s3h&AN=SPH383596&site=ehost-live>; <http://articles.sirc.ca/search.cfm?id=383596>

ER -

TY - JOUR

ID - 1137

T1 - Making Sense of Children's Play Spaces

A1 - Winther, N.R.

Y1 - 1986//

N1 - Accession Number: SPH338894; Author: Winther, N.R. ; Conference: North American Society for the Sociology of Sport. Seventh Annual Meeting. Las Vegas, Nevada. (October 29-November 1, 1986).; Language: English; References: 7; Database Subset: SIRLS Database; Publication Type: Journal article; Update Code: 19940101; SIRC Article No.: 338894

KW - \*PLAY

KW - \*SPORTS facilities

KW - CHILDREN

KW - CONSUMERS' preferences

KW - SportDiscus

RP - NOT IN FILE

SP - 10

JA - Unpublished Paper

N2 - Studies the favourite play spaces of children. Discusses some characteristics of children's play spaces: close to nature, located away from adult eyes, and rich with sensory stimulation. Notes the inclusion of pet animals, the desire to experience both aloneness and togetherness, and the attractiveness of the opportunity to take risks. Points out that children see the multiple possibilities of objects or situations as opportunities for play, and move freely between reality and fantasy. Emphasizes that adults who wish to create 'child-friendly' spaces must reflect on their own childhood experiences and try to understand how the world is seen through the eyes of children

UR -

<https://login.proxy.bib.uottawa.ca/login?url=http://search.ebscohost.com/login.aspx?direct=true&db=s3h&AN=SPH338894&site=ehost-live>; <http://articles.sirc.ca/search.cfm?id=338894>

ER -

TY - JOUR

ID - 1138

T1 - WORKMEN'S compensation; horseplay doctrine limited in California

Y1 - 1946/04//

N1 - Current legal thought; the lawyers' digest of law reviews

58720310R

OM

Journal Article

English

KW - Medline

KW - Rough and Tumble

KW - Industry

KW - Medicine  
KW - Occupational Diseases  
KW - Workers' Compensation  
RP - NOT IN FILE  
SP - 295  
JF - Current legal thought; the lawyers' digest of law reviews  
JA - Curr.Leg.Thought Lawyers.Dig.Law Rev  
VL - 12  
CY - Not Available  
UR - 20987214  
ER -

TY - JOUR  
ID - 1139  
T1 - Rough and tumble guide to laundering  
Y1 - 1994/01//  
N1 - Elderly care  
bp9, 9310629  
N

Journal Article  
English  
KW - Medline  
KW - Rough and Tumble  
KW - Laundering  
RP - NOT IN FILE  
SP - 14  
EP - 15  
JF - Elderly Care  
JA - Elder.Care  
VL - 6  
IS - 1  
CY - ENGLAND  
SN - 1369-1856  
UR - 8148826  
ER -

TY - JOUR  
ID - 1140  
T1 - The effects of neonatal exposure to testosterone on the development of behaviour in female marmoset monkeys  
A1 - Abbott,D.H.  
A1 - Hearn,J.P.  
Y1 - 1978/03/14/  
N1 - Abbott, D H. Hearn, J P  
Ciba Foundation symposium  
d7x, 0356636  
IM

Journal Article  
English  
KW - Medline  
KW - Rough and Tumble  
KW - Animals  
KW - Newborn  
KW - Behavior  
KW - Animal/de [Drug Effects]  
KW - Body Weight

KW - Callitrichinae  
 KW - Drug Implants  
 KW - Female  
 KW - Genitalia  
 KW - Female/ah [Anatomy & Histology]  
 KW - Female/de [Drug Effects]  
 KW - Haplorhini  
 KW - Humans  
 KW - Male  
 KW - Sexual Behavior  
 KW - Testosterone/pd [Pharmacology]  
 RP - NOT IN FILE  
 SP - 299  
 EP - 327  
 JF - Ciba Foundation Symposium  
 JA - Ciba Found.Symp.  
 IS - 62

CY - NETHERLANDS

N2 - Experimental investigations of sexual differentiation in primates have been mainly confined to the rhesus monkey, a highly polygamous species with marked anatomical and behavioural sexual dimorphism. The marmoset is a monogamous monkey which shows little anatomical or behavioural sexual dimorphism, and both sexes exhibit positive feedback in response to the administration of oestradiol. This monkey has a relatively short gestation period of 144 days and usually gives birth to dizygotic twins. These share a common placental circulation and hence develop as haematopoietic chimaeras. However, a female with a male co-twin is not adversely affected as a result of this and the freemartin condition does not occur. Since the newborn male experiences raised testosterone levels soon after birth it is possible that the 'critical period' for sexual marmosets were implanted with 25 mg of testosterone for 50 days after birth. After removal of the implants their genitalia remained partly masculinized and they initiated more masculine rough-and-tumble play than their controls. After puberty they exhibited a mixture of male and female sexual behaviour when presented with unfamiliar normal males and females during 15-minute behavioural trials. Four of the implanted females have also ovulated. Neonatal administration of testosterone therefore has had an organizing effect on female behaviour. Whether the marmoset is exceptional in this respect, or whether other primates which exhibit a male neonatal testosterone surge, such as man and the rhesus monkey, also undergo some postnatal behavioural differentiation, remains to be seen

SN - 0300-5208

UR - 111908

ER -

TY - JOUR

ID - 1141

T1 - Giggle time--establishing the social connection--a program to develop the communication skills of children with autism, Aspergers syndrome and PDD

A1 - Attridge,Catherine

Y1 - 2005///

N1 - Peer Reviewed Journal: 2005-14164-009

English

Journal; Peer Reviewed Journal

KW - PsycInfo

KW - Rough and Tumble

KW - Aspergers Syndrome

KW - Autism

KW - Communication Skills

KW - Pervasive Developmental Disorders

KW - Social Skills

RP - NOT IN FILE

SP - Oct

EP - 314

JF - Child Language Teaching and Therapy

VL - .21

IS - 3

N2 - Reviews the book, Giggle time--establishing the social connection--a program to develop the communication skills of children with autism, Aspergers syndrome and PDD by S. A. Sonders (2002). This book is a child oriented, well structured, instruction book. It outlines the skills needed to teach the tools of: reciprocity, turn taking and joint attention, in young children. The reader is given the blue prints for many fast, physical and fun packed play sequences that can be tailored to and developed for individual children. The main body of the book, Chapters 1-4, is devoted to working with children who are at the more severe end of the autistic spectrum. Games are based around rough and tumble, deep pressure, sensory props and exaggerated, predictable words and phrases. The last section, Chapter 5, has games based on verbal play routines as a means to developing social reciprocity, receptive and expressive language. (PsycINFO Database Record (c) 2012 APA, all rights reserved)

SN - 0265-6590

ER -

TY - JOUR

ID - 1142

T1 - Rough-and-Tumble Social Play in Humans. [References]

A1 - Fry, Douglas P.

Y1 - 2005///

N1 - Book: 2005-09269-004

English

Book; Edited Book

KW - PsycInfo

KW - Rough and Tumble

KW - Aggressive Behavior

KW - Animal Play

KW - Childhood Play Behavior

KW - Social Behavior

RP - NOT IN FILE

SP - 308

JF - Pellegrini, Anthony D [Ed]; Smith, Peter K [Ed]

IS - 2005

N2 - (from the chapter) A great deal of play in humans involves interaction with others in the social world. Social play is diverse, involving physical games, running, jumping, and wrestling as well as a plethora of jointly created make-believe enactments of social scenes, activities, and rituals. Two or more children may assume particular roles during social play, such as "mother" and "children," "hunters" and "prey," "buyers" and "sellers," or "wedding guests," "bride," "groom," and "priest." As we will see later, the imitation of adult activities forms a prominent feature of social play across cultural settings. This chapter focuses on one form of social play called rough-and-tumble (R&T) in humans. The term "rough-and-tumble play" was originally used to describe play chasing, fleeing, and wrestling in rhesus monkeys (Harlow & Harlow, 1965), but R&T also occurs in many other animal species (Aldis, 1975; Eimon & Potegal, 1991; Fagen, 1981; Pellis, Field, Smith, & Pellis, 1996; Smith, 1982). In primates, Jolly (1985, p. 406) notes, "chasing and wresting with peers is ubiquitous. Every species has rough-and-tumble." A number of features typify R&T in mammals: Threats are absent or infrequent, movements are free and easy, muscle tone is relaxed, biting is inhibited, play signals such as the play face and play vocalizations are evident, roles frequently reverse, dominance relations are relaxed, animals of different sizes are partners, and sequences of behavior vary (Aldis, 1975; Bekoff & Byers, 1981, 1985; Fagen, 1978, 1981; Pellis, 1984; Smith, 1982; Symons, 1978). (PsycINFO Database Record (c) 2012 APA, all rights reserved)

AD - Fry, Douglas P.: Department of Social Sciences, Abo Akademi University, Vaasa, Finland

ER -

TY - JOUR

ID - 1143

T1 - The nature of play: Great apes and humans

A1 - Pellegrini, Anthony D.

Y1 - 2005///

N1 - Book: 2005-09269-000

English

Book; Edited Book

(Created by PsycINFO) Part I: Background and Theory \* Play in Great Apes and Humans / Anthony D. Pellegrini and Peter K. Smith / 3-12 \* The Role of Play in the Evolution of Great Apes and Humans / Patrick Bateson / 13-24 Part II: Social Play \* Social Play in the Great Apes / Kerrie P. Lewis / 27-53 \* Rough-and-Tumble Social Play in Humans / Douglas P. Fry / 54-85 Part III: Object Play \* Object Play in Great Apes: Studies in Nature and Captivity / Jacklyn K. Ramsey and William C. McGrew / 89-112 \* Boys' and Girls' Uses of Objects for Exploration, Play, and Tools in Early Childhood / Anthony D. Pellegrini and Kathy Gustafson / 113-135 Part IV: Fantasy \* Fantasy Play In Apes / Juan-Carlos Gomez and Beatriz Martin-Andrade / 139-172 \* Social and Pretend Play in Children / Peter K. Smith / 173-209 Part V: Hunter-Gatherers and Pastoral Peoples \* Play in Hunter-Gatherer Society / Yumi Gosso, Emma Otta, Maria de Lima Salum e Morais, Fernando Jose Leite Ribeiro, and Vera Silvia Raad Bussab / 213-253 \* Farming, Foraging, and Children's Play in the Okavango Delta, Botswana / John Bock / 254-281 Part VI: Conclusion \* Play in Great Apes and Humans: Reflections on Continuities and Discontinuities / Peter K. Smith and Anthony D. Pellegrini / 285-298 Index

KW - PsycInfo

KW - Rough and Tumble

KW - Animal Ethology

KW - Animal Play

KW - Childhood Play Behavior

KW - Developmental Psychology

KW - Primates (Nonhuman)

RP - NOT IN FILE

SP - 308

JF - (2005)

VL - The nature of play

N2 - (from the jacket) This uniquely integrative volume brings together leading experts in developmental psychology and animal behavior to provide a new perspective on the nature and functions of play. In an introductory chapter, distinguished ethologist Patrick Bateson describes how youthful exploration and games contribute to both individual development and group survival-not only in humans, but in other species as well. Parallel chapters then examine rough-and-tumble play, object play, and pretend or fantasy play in humans and great apes. Explored are the ways in which specific play behaviors generate skills and knowledge that are needed for successful functioning throughout life, as well as what they reveal about evolutionary processes. Topics covered include: How play fighting among both animals and humans enhances social cohesion; sex differences in play from infancy through adolescence; ways in which play fosters peer and parent-child relationships; how preschoolers learn to use objects as tools; and why imaginative play is so much more common in human children than in apes. While much of the knowledge on human play comes from industrialized Western societies, the book also features important chapters on hunter-gatherer and pastoral cultures. Comprehensive and up to date, this volume belongs on the desks of researchers and students in developmental psychology, comparative psychology, animal behavior, and evolutionary psychology, and will also be of interest to anthropologists. It is a richly informative text for advanced undergraduate- and graduate-level courses. (PsycINFO Database Record (c) 2012 APA, all rights reserved)

AD - Pellegrini, Anthony D.: Department of Educational Psychology, University of Minnesota, Twin Cities, MN, US Smith, Peter K.: School and Family Studies, Goldsmiths College, University of London, London, United Kingdom

ER -

TY - JOUR

ID - 1144

T1 - Play and the Regulation of Aggression. [References]

A1 - Peterson, Jordan B.

Y1 - 2005///



N1 - Book: 2005-09268-007

English

Book; Edited Book

KW - PsycInfo

KW - Rough and Tumble

KW - Aggressive Behavior

KW - Childhood Development

KW - Childhood Play Behavior

KW - Self Regulation

KW - SOCIALIZATION

KW - Aggressiveness

KW - Interpersonal Interaction

RP - NOT IN FILE

SP - 480

JF - Tremblay, Richard E [Ed]; Hartup, Willard W [Ed]; Archer, John [Ed]

IS - 2005

N2 - (from the chapter) This chapter concludes that the individual brings to the world a set of inborn motivations, including those that underlie aggression, and these motivations are brought under control--or not--as a consequence of socialization. This control appears at least twofold. The direct inhibition and regulation of aggression appears established as a consequence of rough-and-tumble (R&T) play and also appears associated, in principle, with the development of some forms of executive control. R&T play is different from exploratory activity and from aggression--two forms of behavior with which it can easily be confused. R&T play and exploratory activity share the fact that both are enjoyable. Formal behavioral analysis clearly discriminates R&T play from genuine aggression. Furthermore, it is clear that pathological socialization experiences, first in the context of the family and second in the context of early peer experiences (variants of the institutional sickness described by Rousseau) can produce and then reinforce in a child the conviction that the world is a cruel and sadistic place, fit only for interpretation through lenses colored by the desire for revenge. Finally, it is clear that complex processes of play, beginning with R&T play and culminating in the production of sophisticated, abstract socially shared frames of reference, play an important role in the modulation of aggression, both in regard to its inhibition and in regard to its integration into fully functional individual and social identities. (PsycINFO Database Record (c) 2012 APA, all rights reserved)

AD - Peterson, Jordan B.: Department of Psychology, University of Toronto, Toronto, ON, Canada  
Flanders, Joseph L.: Department of Psychology, McGill University, Montreal, PQ, Canada

ER -

TY - JOUR

ID - 1145

T1 - Recess: Its role in education and development. [References]

A1 - Pellegrini, Anthony D.

Y1 - 2005///

N1 - Book: 2005-07528-000

English

Book; Authored Book

(Created by PsycINFO) Preface Acknowledgments The Debate Over Recess: A Sad Tale of the Disjunctive Between Educational Policy and Scientific Research A Brief History of the Place of Play and Recess in American Schools The School Playground as a Venue for Children's Social Development The Two Worlds of the Playground: Gender Segregation at Recess Gender Differences in Preference for Outdoor Recess Children's Play and Rough-and-Tumble Play on the Playground Children's Games on the Playground at Recess The Role of Recess in Children's Cognitive Performance in Classrooms Summing Up: What Are the Implications of Recess for Children in School? References Author Index Subject Index

KW - PsycInfo

KW - Rough and Tumble

KW - Childhood Development

KW - Childhood Play Behavior

KW - Educational Programs

KW - Playgrounds

KW - Recreation

KW - Elementary Schools

RP - NOT IN FILE

SP - 202

JF - (2005)

VL - Recess

N2 - (from the preface) Writing a book about recess could be a very questionable endeavor for a serious academic psychologist. At first blush it seems to be a pretty trivial topic. It's the time during the school day when there's a break from what's typically considered the most serious work of the day--reading, writing, and arithmetic. Reflecting this trivial sort of tenor, it's also that time that kids will, perhaps only half-jokingly, say is their favorite part of the school day. There's even a cartoon TV show for kids called Recess! All of this reinforces the popular notion that recess is indeed trivial and certainly not worthy of serious academic and scientific attention. This perception has, I think, led to many schools questioning the role of recess in the school day. This orientation, I think, has done much more harm than good. If studying the role of recess during the school day seems questionable, so too, some people think, is the idea of taking recess away from kids in primary school. When people first hear of this state of affairs, a frequent initial reaction is disbelief--"You've got to be kidding!" This book attempts to broach these two views of recess; the perceived value of recess and the movement to eliminate or reduce the school recess period from the primary school day. Over the past 10 years, I have been contacted by a number of folk concerned with this trend. They know, in their hearts, that something is wrong here. When they speak with me, they ask for advice on how to counter the trend. I hope that this book helps them in this important job. (PsycINFO Database Record (c) 2012 APA, all rights reserved)

AD - Pellegrini, Anthony D.: University of Minnesota, MN, US

ER -

TY - JOUR

ID - 1146

T1 - A Qualitative Approach to Boys' Rough and Tumble Play: There Is More Than What Meets the Eye.

[References]

A1 - Reed, Thomas L.

Y1 - 2005///

N1 - Book: 2005-06383-003

English

Book; Edited Book

KW - PsycInfo

KW - Rough and Tumble

KW - Childhood Play Behavior

KW - Human Males

KW - Personality Traits

KW - Aggressive Behavior

KW - Ethnography

KW - Prosocial Behavior

RP - NOT IN FILE

SP - MD, US

JF - McMahan, F

VL - F [Ed]; Lytle, Donald E [Ed]; Sutton-Smith, Brian [Ed].

IS - 2005

N2 - (from the chapter) The purpose of this ethnographic study was to examine and describe the way in which preadolescent boys in a natural setting express care for one another through rough and tumble (R&T) play. Caring, like playing, is a universal concept but not easily defined. Noddings (1990) calls caring the most significant form of human response. Caring, compassion, and connection are important for all people to understand and value (Noddings, 1990). Donaldson (1976) theorizes that care is expressed through R&T play. This research study is designed to test this theory and to answer the following questions: (1) How do boys set up the R&T experience? and (2) How do they express care for one another through a set of behaviors that appear to be aggressive in nature? (PsycINFO Database Record (c) 2012 APA, all rights reserved)

AD - Reed, Thomas L.: University of South Carolina, School of Education, Spartanburg, SC, US

ER -

TY - JOUR

ID - 1147

T1 - Play: An interdisciplinary synthesis. [References]

A1 - McMahon,F.

Y1 - 2005///

N1 - Book: 2005-06383-000

English

Book; Edited Book

(Created by PsycINFO) (Abbreviated) Editor's Note Acknowledgments Introduction I. Evolutionary Resonances for Play \* Play, Five Gates of Evolution, and Paths to Art / Robert Fagen / 9-41 \* Video Entertainment May Facilitate Recovery for Monkeys in a Clinical Setting / Peggy O'Neill-Wagner / 43-51 \* A Qualitative Approach to Boys' Rough and Tumble Play: There Is More Than What Meets the Eye / Thomas L. Reed / 53-71 II. Cross Cultural Play Variations \* Children's Play in Cross-Cultural Perspective: A New Look at the "Six Cultures" Study / Carolyn Pope Edwards / 81-96 \* Children's Play and Toys in Changing Moroccan Communities / Jean-Pierre Rossie / 97-111 \* At Work At Play: Training Hindu Nationalist Women / Kalyani Devaki Menon / 113-133 \* Ludic Pathologies and Their Links to Play: Cultural and Neurocognitive Perspectives / Donald E. Lytte / 135-153 III. The Play Systemics of Education \* Play in Lower Primary School in Norway / Arne Trageton / 157-177 \* The Mill Lake Hospital: Play in a Middle Classroom / Lynn Romeo and Kristie L. Andrews / 179-193 \* Preschool Teachers' Conceptions of Children's "Chaotic Play" / Annica L. Lofdahl / 195-204 IV. The Variabilities Adult Leisure \* Working to Play: College Student Athletes' Conceptions of Play and Work / Robin M. Holmes / 209-231 \* Community Play: At the Mall / Felicia McMahon / 233-254 \* Validity and Reliability of the Experience of Leisure Scales (TELS) / Cheryl R. H. Meakins, Anita C. Bundy and Jeffrey Gliner / 255-278 \* Collecting as a Form of Play / Paola de Sanctis Ricciardone / 279-290 V. Conclusion: Playfulness and Tricksters Interstitial References Index About the Contributors Recent Titles in Play & Culture Studies Series

KW - PsycInfo

KW - Rough and Tumble

KW - Culture (Anthropological)

KW - Recreation

KW - Cross Cultural Differences

KW - Leisure Time

KW - Schools

KW - SOCIALIZATION

RP - NOT IN FILE

SP - MD, US

JF - (2005)

VL - Play

N2 - (from the introduction) This volume is the sixth in the present Play and Culture Studies series. The following volume is organized into four major sections: First (Part I), on the basic data about the evolution of play, second (Part II), then proceeds to evidence about universality from cross cultural comparisons, third (Part III), provides samples of the role of play in school socialization, and fourth (Part IV), concludes with some of the varying types of leisure as play to be found among adults. The references for this introduction and the interstitial material appear as a final bibliography. The other authors' references appear within each of their respective chapters. (PsycINFO Database Record (c) 2012 APA, all rights reserved)

AD - McMahon, F. F.: Syracuse University, Department of Anthropology, Syracuse, NY, US Lytle, Donald E.: California State University, Department of Kinesiology, Chico, CA, US Sutton-Smith, Brian: University of Pennsylvania, Department of Education, Philadelphia, PA, US

ER -

TY - JOUR

ID - 1148

T1 - Preschool Children's Pretend and Physical Play and Sex of Play Partner: Connections to Peer Competence. [References]

A1 - Colwell,Malinda J.

Y1 - 2005///

N1 - Peer Reviewed Journal: 2005-05502-007

English

Journal; Peer Reviewed Journal

KW - PsycInfo

KW - Rough and Tumble

KW - Childhood Play Behavior

KW - Human Sex Differences

KW - Peer Relations

KW - Social Skills

KW - Preschool Students

RP - NOT IN FILE

SP - Apr

EP - 509

JF - Sex Roles

VL - .52

IS - 7-8

N2 - This study was designed to examine associations between preschool children's pretend and physical play with same-sex, other-sex, and mixed sex peers and children's social competence with peers. Sixty predominately middle-class preschoolers (33 boys, 51 European-American) were observed on the playground at their school over a period of 4 months. Children's same-sex, other-sex, and mixed-sex peer play was observed, and teachers and peers provided assessments of children's social competence. Analyses revealed that children who engaged in more same-sex pretend play were better liked by peers and were viewed by teachers as being socially competent. In addition, girls who engaged in same-sex exercise play and boys who engaged in same-sex rough-and-tumble play were better liked by peers, whereas boys who engaged in rough-and-tumble play with other-sex peers were less liked by peers. The results suggest that child gender and gender of playmate are important factors in the association between pretend play and rough-and-tumble play and children's social competence with peers. (PsycINFO Database Record (c) 2012 APA, all rights reserved) (journal abstract)

SN - 0360-0025

AD - Colwell, Malinda J.: Department of Human Development and Family Studies, Texas Tech University,

Lubbock, TX, US Lindsey, Eric W.: Department of Human Development and Family Studies, Texas Tech

University, Lubbock, TX, US

ER -

TY - JOUR

ID - 1149

T1 - Play: Types and Functions in Human Development. [References]

A1 - Smith, Peter K.

Y1 - 2005///

N1 - Book: 2004-21781-011

English

Book; Edited Book

KW - PsycInfo

KW - Rough and Tumble

KW - Childhood Play Behavior

KW - Developmental Psychology

KW - Human Development

KW - Games

KW - Recreation

RP - NOT IN FILE

SP - 540

JF - Ellis, Bruce J [Ed]; Bjorklund, David F [Ed]

IS - 2005

N2 - (from the chapter) Play is often defined as activity that is both done for its own sake and is characterized by "means rather than ends"-the process of the play is more important than any end point or goal that is obvious to the participant or "naive" onlooker. These criteria contrast play with exploration (which may lead into play, as a child gets more familiar with a new toy or environment), and with work- or subsistence-related activities such

as feeding (which have a definite, obvious goal) and fighting (different from play fighting, as discussed later). Additional common characteristics of human play are flexibility (objects being put in new combinations, roles acted out in new ways), positive affect (children often smile and laugh in play, and say they enjoy it) and pretense (use of objects and actions in nonliteral ways). Although play may have no "obvious" goal, this does not mean that it has no positive benefits. Also, it does not mean that play has no evolutionary function(s). In fact, the ubiquity of forms of play throughout most mammal species, and humans in all cultures studied to date, and the time, energy, and sometimes danger costs of engaging in them, strongly suggest that selective pressures have acted to favor play behaviors, and that they have some functional value for the player, even if he or she is not fully aware of it. However, the range of functions for play, and strength of evidence for them, is still a matter of considerable debate. The following main types of play are well recognized: physical activity play (rhythmic stereotypies, exercise play; rough-and-tumble play); object play; and pretend play (including sociodramatic play as a particularly complex form). Of these, physical activity play and object play are seen widely in other species of mammals. Pretend and sociodramatic play are only seen in humans, apart from some possibly very elementary forms of pretense in great apes. A related concept in developmental psychology is that of games. Games with rules describe more organized forms of play in which there is some clear and publicly expressed goal (such as winning the game in a manner accepted by other players); games with rules are not reviewed furthering this chapter. (PsycINFO Database Record (c) 2012 APA, all rights reserved)

AD - Smith, Peter K.: Goldsmiths College, University of London, Department of Psychology, Unit for School and Family Studies, London, United Kingdom

ER -

TY - JOUR

ID - 1150

T1 - Relationships Among Motivational Climate, Satisfaction, Perceived Ability, and Fair Play Attitudes in Young Soccer Players. [References]

A1 - Boixados,Merce; Cruz,Jaume; Torregrosa,Miquel; Valiente,Lourdes

Y1 - 2004///

N1 - Peer Reviewed Journal: 2004-21395-001

English

Journal; Peer Reviewed Journal

KW - PsycInfo

KW - Rough and Tumble

KW - Motivation

KW - Satisfaction

KW - Soccer

KW - Sports (Attitudes Toward)

KW - Sport Psychology

RP - NOT IN FILE

SP - Dec

EP - 317

JF - Journal of Applied Sport Psychology

VL - .16

IS - 4

N2 - The present study examined relationships among perceptions of motivational climate, perceived ability, satisfaction and fair play attitudes in young soccer players. Participants were 472 male Catalan players (from 10 to 14 years). Results indicated that perceptions of a task-involving climate were positively associated with satisfaction in practices and self-referenced perceived ability and were inversely related to rough play attitudes and normative perceived ability. In addition, perceptions of an ego-involving motivational climate were related positively with normative perceived ability and with favorable attitudes towards winning in a soccer game. The differences across motivational climate profiles groups revealed that the highest level of acceptance of rough play was found in the subgroup with a low-task/high-ego orientation. In contrast, the lowest level of acceptance of rough play was found in the opposite subgroup of high-task/low-ego. The findings support the importance of creating a task-involving climate in sports. (PsycINFO Database Record (c) 2012 APA, all rights reserved)

(journal abstract)

SN - 1041-3200

AD - Boixados, Merce: Universitat Oberta de Catalunya, Barcelona, Spain Cruz, Jaume: Universitat Autònoma de Barcelona, Spain Torregrosa, Miquel: Universitat Autònoma de Barcelona, Spain Valiente, Lourdes: Universitat Oberta de Catalunya, Barcelona, Spain  
ER -

TY - JOUR

ID - 1151

T1 - Conceptualizing Fathers' Roles: Playmates and More. [References]

A1 - Tamis-LeMonda, Catherine S.

Y1 - 2004///

N1 - Peer Reviewed Journal: 2004-18780-002

English

Journal; Peer Reviewed Journal

KW - PsycInfo

KW - Rough and Tumble

KW - Childhood Development

KW - Father Child Communication

KW - Father Child Relations

KW - Mother Child Relations

KW - Parental Role

RP - NOT IN FILE

SP - Jul

EP - Aug

JF - Human Development

VL - .47

IS - 4

N2 - Comments on the article by Daniel Paquette (see record 2004-18780-001). Despite the exponential growth in fatherhood studies over the past several decades, research on fathers remains largely a-theoretical. Therefore the author's theorizing about co-dependencies between evolution and biology, styles of parent-child social engagements, attachment relationships, and developmental outcomes in children is a welcome contribution to the field. His description of the father-infant activation relationship is simultaneously controversial and provocative, and the opportunity to respond to, praise, criticize and analyze a well-articulated position is of enormous value. The central tenet of author's article is that fathers occupy a special place in children's development. Fathers arouse their children during bouts of rough-and tumble play, and this 'activation relationship' is fundamental to positive developmental outcomes in children. The author offers an intriguing evolutionary interpretation of the well documented finding that fathers engage in greater amounts of rough and tumble play relative to mothers. His theory incites reflection about the ways in which cultural values, tools, opportunities and practices intersect with biology. That in itself is an admirable feat. (PsycINFO Database Record (c) 2012 APA, all rights reserved)

SN - 0018-716X

AD - Tamis-LeMonda, Catherine S.: New York University, New York, NY, US

ER -

TY - JOUR

ID - 1153

T1 - Father-child relationship and openness to the world. [French]. [References]

A1 - Paquette, Daniel

Y1 - 2004///

N1 - Peer Reviewed Journal: 2004-15103-005

French

Journal; Peer Reviewed Journal

KW - PsycInfo

KW - Rough and Tumble

KW - Attachment Behavior

KW - Childhood Development

KW - Father Child Relations

RP - NOT IN FILE

SP - Apr

EP - 225

JF - Enfance

VL - .56

IS - 2

N2 - Here I propose to use the father-child "activation relationship" to explain the emotional bond of the child to his father. Contrary to the mother-child attachment relationship which permits the child to be calmed, the father-child activation relationship answers the child's need to be stimulated, to surpass himself in a context in which the child is confident of being protected from potential dangers. In a quality activation relationship, the child would learn to trust his own ability to deal with threats and strangeness of his physical and social environment, since his father would incite him to take greater chances while exploring in a secure context. Fathers may play an indirect role via the emotional and physical support given to the mother during stressful periods, and a direct role in the development of exploration and autonomy as early as the second year of life during non-stressful periods. In particular, the father-child rough-and-tumble play during preschool years may prepare a child to assert himself in a competitive world, in a socialized manner without using aggression.

(PsycINFO Database Record (c) 2012 APA, all rights reserved) (journal abstract)

SN - 0013-7545

AD - Paquette, Daniel: Institut de Recherche Pour le Developpement Social des Jeunes, Centre Jeunesse de Montreal et Departement de Psychologie, Universite de Montreal, Montreal, PQ, Canada

ER -

TY - JOUR

ID - 1154

T1 - Dolls

A1 - Zucker, Kenneth J.

Y1 - 2004///

N1 - Book: 2004-13881-014

English

Book; Edited Book

KW - PsycInfo

KW - Rough and Tumble

KW - Child Psychotherapy

KW - Childhood Development

KW - Gender Identity Disorder

KW - Treatment

RP - NOT IN FILE

SP - 334

JF - Spitzer, Robert L [Ed]; First, Michael B [Ed]; Gibbon, Miriam [Ed]; Williams, Janet B

VL - W [Ed].

IS - 2004

N2 - (from the chapter) Discusses the case of an 8-year-old boy for whom his parents seek treatment because "he wants to be a girl". The patient has a strong and persistent identification of himself as a female. He frequently states his desire to be a girl--not just play a female role. He is preoccupied with female stereotypical activity, preferring to play with girls and pretending that he is a girl, and frequently cross-dresses. He plays exclusively with stereotypically female toys such as dolls. When imitating characters from books and television, he always chooses female characters. There is also evidence of a persistent discomfort with being a boy. He rejects stereotypical male toys and activities and shows an aversion toward rough-and-tumble play. These are the characteristic features of Gender Identity Disorder (GID) as seen in a male. When the examiner provides feedback to the parents, they could be informed that the patient does appear to be unhappy about being a boy and that the goal of treatment would be to try and help him to feel more comfortable as a boy. Along similar lines, Rocky should be asked whether he would like to meet with a "talking doctor" to see if there are ways to help him feel happier about being a boy. The author's approach to treatment would be a combination of individual therapy with the patient, counseling with the parents, and specific recommendations for the parents to carry out in his naturalistic day-to-day environment. Individual therapy would be used with Rocky to explore his

fantasies that being a girl would make his life better. (PsycINFO Database Record (c) 2012 APA, all rights reserved)

AD - Zucker, Kenneth J.: Centre for Addiction and Mental Health-Clarke Division, Child, Youth, and Family Program, Gender Identity Service, Toronto, ON, Canada

ER -

TY - JOUR

ID - 1155

T1 - Attention deficit hyperactivity disorder in children: One consequence of the rise of technologies and demise of play? [References]

A1 - Armstrong, Thomas

Y1 - 2003///

N1 - Book: 2004-14727-007

English

Book; Edited Book

KW - PsycInfo

KW - Rough and Tumble

KW - Attention Deficit Disorder with Hyperactivity

KW - Childhood Play Behavior

KW - Frontal Lobe

KW - Neural Development

KW - Technology

KW - Computers

KW - Television

RP - NOT IN FILE

SP - 215

JF - Olfman, Sharna [Ed]

IS - 2003

N2 - (from the introduction) Presents evidence that current approaches to education that promote screen time and minimize opportunity for play are exacerbating the Attention Deficit Hyperactivity Disorder epidemic. The "rapid-fire" stimulation that children are exposed to increasingly on television and computers requires the brain to adapt information-processing strategies that become dysfunctional in contexts such as the classroom, in which--at increasingly younger ages--sustained attention is required. Armstrong also presents research that links physical play to frontal lobe development, which supports the capacities for organization, classification, synthesis, reflection, and cooperation. Diminished opportunities for rough-and-tumble play may thus be compromising frontal lobe development and exacerbating symptoms of hyperactivity, distractibility, and impulsivity. (PsycINFO Database Record (c) 2012 APA, all rights reserved)

ER -

TY - JOUR

ID - 1156

T1 - A Qualitative Investigation of Bullying: The Perspectives of Fifth, Sixth and Seventh Graders in USA Parochial School. [References]

A1 - Gamliel, Tiram

Y1 - 2003///

N1 - Peer Reviewed Journal: 2003-10267-004

English

Journal; Peer Reviewed Journal

KW - PsycInfo

KW - Rough and Tumble

KW - Intermediate School Students

KW - Middle School Students

KW - Schools

KW - Bullying

RP - NOT IN FILE

SP - Nov



EP - 420

JF - School Psychology International

VL - .24

IS - 4

N2 - Rarely have investigators qualitatively tapped the complex and sophisticated knowledge base of children about bullying. The present investigation was conducted in order to plumb the working knowledge of intermediate and middle school students about potential strategies for alleviating bullying. Fifth, sixth and seventh-graders (three males and three females) discussed the prevalence of bullying in their school, methods for dealing with bullying employed in the past and future coping strategies. Two of three female interviewees but none of the males reported experiencing bullying at the time of the interviews. While respondents struggled to articulate strategies for coping with bullying, most participants clearly expressed their desire to rationally work through problems with aggressors. When asked to rank order suggested strategies, participants selected violent or aggressive retaliation as the least effective and least desirable coping strategy. Additional themes emerging from the data include gender based experiential and interpretive differences, including the tendency for males to classify most potential conflicts as harmless horseplay. Interviewees portrayed chronic victims as passive and ineffectual when it came to dealing with aggression. (PsycINFO Database Record (c) 2012 APA, all rights reserved)

SN - 0143-0343

AD - Gamliel, Tiram: Richard P. Stadter Psychiatric Center, Grand Forks, ND, US Hoover, John H.: The Department of Special Education, St. Cloud State University, St. Cloud, MN, US Daughtry, Donald W.: Department of Counseling, University of North Dakota, ND, US Imbra, Christine M.: Department of Educational Leadership St. Cloud State University, St. Cloud, MN, US

ER -

TY - JOUR

ID - 1157

T1 - Rough-and-tumble play in human children. [References]

A1 - Scott, Eric

Y1 - 2003///

N1 - Peer Reviewed Journal: 2003-09794-006

English

Journal; Peer Reviewed Journal

KW - PsycInfo

KW - Rough and Tumble

KW - Aggressive Behavior

KW - Aggressiveness

KW - Childhood Play Behavior

KW - Human Sex Differences

RP - NOT IN FILE

SP - 2003, pp

EP - 2003,551

JF - Aggressive Behavior

JA - Aggress.Behav

VL - .29

IS - 6

N2 - Rough and tumble (R&T) play is a unique set of behaviors that can be reliably distinguished from aggression and other childhood activities. Although it may be the most fundamental form of play, it has received comparatively little experimental attention in the human species. Forty children, ages three to six, were allowed to play in pairs (10 male pairs, 10 female pairs) during a 30 minute videotaped session with no toys available while music played in the background during every other five-minute time period. The incidence frequency of children's play and related behavioral activities were scored using 20 behavioral categories. The major findings show only modest gender differences in the frequency of play behaviors in such controlled social encounters; the main difference is that boys engaged in slightly more physical play solicitations than girls. Music facilitated General Motor Activities (e.g., Running and Walking behaviors), but not specific R&T play actions (e.g., Wrestling, Ventral and Dorsal contacts). Finally, most play behaviors as well as general activities declined systematically over the course of each recording session. This experiment highlights how human social play can

be systematically studied in a controlled laboratory setting. (PsycINFO Database Record (c) 2012 APA, all rights reserved) (journal abstract)

SN - 0096-140X

AD - Scott, Eric: Indiana U School of Medicine, Indianapolis, IN, US Panksepp, Jaak: Bowling Green State U, Dept of Psychology, Bowling Green, OH, US

ER -

TY - JOUR

ID - 1158

T1 - Consequences of the intervention programme for developing Hellison's Personal and Social Responsibility on fair-play and self-control behaviours. [Spanish]. [References]

A1 - Cecchini,Jose A.

Y1 - 2003///

N1 - Peer Reviewed Journal: 2003-09589-017

Spanish

Journal; Peer Reviewed Journal

KW - PsycInfo

KW - Rough and Tumble

KW - Behavior

KW - Intervention

KW - Responsibility

KW - Self Control

KW - Social Responsibility

RP - NOT IN FILE

SP - Nov

EP - 637

JF - Psicothema

VL - .15

IS - 4

N2 - This study tested consequences obtained from the Intervention Programme for developing Hellison's Personal and Social Responsibility (1995) about fair-play behaviours and self-control among young students. The sample was formed by students from two state schools (N = 142), with an average age of 12.7 (experimental group = 72, control group = 70). The Intervention Programme was applied to the experimental group throughout ten one hour periods on indoor football initiation. The results showed, in experimental group, meaningful improvements in personal feedback, reward delay, criterial self-control, self-control process, opinions related to enjoyments, and sporting behaviours. Decreases in variables related to rough play, and un-sporting behaviours were observed. No meaningful changes were found in the control group. (PsycINFO Database Record (c) 2012 APA, all rights reserved)

SN - 0214-9915

AD - Cecchini, Jose A.: Universidad de Oviedo, Oviedo, Spain Montero, Javier: Universidad de Oviedo, Oviedo, Spain Pena, Jose V.: Facultad de Education, Universidad de Oviedo, Oviedo, Spain

ER -

TY - JOUR

ID - 1160

T1 - Prevalence of father-child rough-and-tumble play and physical aggression in preschool children. [References]

A1 - Paquette,Daniel; Carbonneau,Rene; Dubeau,Diane; Bigras,Marc; Tremblay,Richard

Y1 - 2003///

N1 - Peer Reviewed Journal: 2003-09190-006

English

Journal; Peer Reviewed Journal

KW - PsycInfo

KW - Rough and Tumble

KW - Aggressive Behavior

KW - Childhood Development

KW - Childhood Play Behavior

KW - Family

KW - Father Child Relations

KW - epidemiology

KW - Fathers

KW - Parental Characteristics

KW - Psychosocial Factors

RP - NOT IN FILE

SP - Jun

EP - 189

JF - European Journal of Psychology of Education

VL - .18

IS - 2

N2 - Three samples of Francophone subjects from Quebec are used to establish the prevalence of parent-child rough-and-tumble (RTP) according to different personal, social and family variables, and to verify if children who engage in more RTP with their father exhibit less physical aggression towards other children and are more competitive without resorting to aggression. Our results showed that 24% to 43% of fathers engaged in RTP with their children on a daily basis, and only 4% to 16% of fathers never do. Moreover, personal characteristics such as the age and sex of the participants seemed to have a greater influence on the frequency of parent-child RTP than variables related for example to work, socioeconomic conditions, or the living environment. The hypothesis that children who engage in more RTP with their fathers display less physical aggression towards their peers is invalidated here. We have concluded that it is important that not only RTP frequency, but also and especially indicators of RTP quality be used. Future observational studies of father-child RTP are required in order to do so. Finally, certain preliminary results support the hypothesis that father-child RTP fosters the development of the competition skills in children without using aggression. (PsycINFO Database Record (c) 2012 APA, all rights reserved) (journal abstract)

SN - 0256-2928

AD - Paquette, Daniel: IRDS, GRAVE-ARDEC, Canada Carbonneau, Rene: U Montreal, Montreal, PQ, Canada Dubeau, Diane: U Quebec en Outouais, GRAVE-ARDEC, PQ, Canada Bigras, Marc: U Sherbrooke, Sherbrooke, PQ, Canada Tremblay, Richard E.: U Montreal, Montreal, PQ, Canada

ER -

TY - JOUR

ID - 1161

T1 - Perceptions and Functions of Play and Real Fighting in Early Adolescence. [References]

A1 - Pellegrini,Anthony D.

Y1 - 2003///

N1 - Peer Reviewed Journal: 2003-08038-017

English

Journal; Peer Reviewed Journal

KW - PsycInfo

KW - Rough and Tumble

KW - Adolescent Attitudes

KW - Adolescent Development

KW - Aggressive Behavior

KW - Childhood Play Behavior

KW - Human Males

KW - Dominance

KW - Male Female Relations

RP - NOT IN FILE

SP - Sep

EP - Oct

JF - Child Development

JA - Child Dev.

VL - .74

IS - 5

N2 - The hypothesis is tested that adolescent boys' (mean age of 12.8 years) intrasexual rough-and-tumble play (R&T) is used for dominance and intersexual R&T is used to establish heterosexual relationships. In Study 1, boys' observed R&T was related to both dominance and aggression. In the first half of the school year, R&T occurred primarily between males, possibly to establish dominance. In the second half of the year, both boys and girls engaged in R&T, possibly to establish heterosexual relationships. Counter to the hypothesis, observed aggression increased across the year. In Study 2, youngsters viewed taped R&T bouts in which they were participants or nonparticipants. Participant, more than nonparticipant, males saw R&T as related to dominance whereas participant, more than nonparticipant, females saw it as playful. (PsycINFO Database Record (c) 2012 APA, all rights reserved) (journal abstract)

SN - 0009-3920

AD - Pellegrini, Anthony D.: U Minnesota, Department of Educational Psychology, Minneapolis, MN, US

ER -

TY - JOUR

ID - 1162

T1 - It's not what you know, it's who you know: Older siblings facilitate imitation during infancy. [References]

A1 - Barr,Rachel

Y1 - 2003///

N1 - Peer Reviewed Journal: 2003-00953-002

English

Journal; Peer Reviewed Journal

KW - PsycInfo

KW - Rough and Tumble

KW - Early Childhood Development

KW - Imitation (Learning)

KW - Siblings

RP - NOT IN FILE

SP - Jan

EP - 21

JA - International Journal of Early Years Education

VL - .11

IS - 1

N2 - Examined the effect of older siblings on imitation by infants. 300 parents provided diary records of imitation by their 12-, 15-, and 18-mo old infants. Results show that infants of all ages acquired 1 to 2 new behaviors daily through imitation. There were also age-related and sibling-related changes in the quality of behaviors acquired through imitation. Older infants imitated more multi-step sequences and substituted more objects during re-enactment than did younger infants. Infants with siblings imitated more behavior without explicit instruction. Imitation by infants with siblings was characterized by a higher level of pretence and rough-and-tumble play. (PsycINFO Database Record (c) 2012 APA, all rights reserved)

SN - 0966-9760

AD - Barr, Rachel: Georgetown U, Washington, DC, US Hayne, Harlene: U Otago, Dunedin, New Zealand

ER -

TY - JOUR

ID - 1163

T1 - Rough-and-tumble play from childhood through adolescence: Development and possible functions. [References]

A1 - Pellegrini,Anthony D.

Y1 - 2002///

N1 - Book: 2003-04408-022

English

Book; Edited Book

KW - PsycInfo

KW - Rough and Tumble

KW - Childhood Development

KW - Childhood Play Behavior

KW - Psychological Terminology

KW - Psychosocial Development

KW - Aggressive Behavior

RP - NOT IN FILE

SP - 665

JF - Smith, Peter K [Ed]; Hart, Craig H [Ed]

IS - 2002

N2 - (from the chapter) This chapter discusses the development and possible functions of rough-and-tumble play from childhood through adolescence. It defines rough-and-tumble play, discusses the developmental trajectory of rough-and-tumble play, and offers suggestions for future research. Conclusions emphasize that not all children seem to need the rough-and-tumble form of play to develop. (PsycINFO Database Record (c) 2012 APA, all rights reserved)

AD - Pellegrini, Anthony D.: U Minnesota, MN, US

ER -

TY - JOUR

ID - 1164

T1 - Blackwell handbook of childhood social development

A1 - Smith, Peter K.

Y1 - 2002///

N1 - Book: 2003-04408-000

English

Book; Edited Book

(Created by PsycINFO) List of contributors Introduction by the editors Part I: Historical overview \* Historical perspectives on contemporary research in social development / W. Andrew Collins / 3-23 Part II: Influences on development: Disciplinary views \* Behavioral genetics, shared and nonshared environment / Alison Pike / 27-43 \* Evolutionary perspectives on social development / David F. Bjorklund and Anthony D. Pellegrini / 44-59 \* Culture and social development: Explanations and evidence / Sara Harkness / 60-77 \* A sociological approach to childhood development / Chris Jenks / 78-94 Part III: Influences on development: Causal factors \* Temperament and social development / Ann Sanson, Sheryl A. Hemphill and Diana Smart / 97-115 \* Sex differences in social behavior / Susan Golombok and Melissa Hines / 117-136 \* Children's social development within the socialization context of childcare and early childhood education / Carollee Howes and Jolena James / 137-155 \* Relative contributions of families and peers to children's social development / Ross D. Parke, Sandra D. Simpkins, David J. McDowell, Mina Kim, Colleen Killian, Jessica Dennis, Mary L. Flyr, Margaret Wild and Yumee Rah / 156-177 Part IV: The family context \* Attachment in childhood / Joan Stevenson-Hinde and Karine Verschueren / 182-204 \* Parent-child relationships / Alan Russell, Jacqueline Mize and Kerry Bissaker / 205-222 \* Sibling relationships / Judy Dunn / 223-237 \* Social development in different family arrangements / Dale F. Hay and Alison Nash / 237-261 Part V: The peer group \* Peer acceptance and rejection in childhood / Shelley Hymel, Tracy Vaillancourt, Patricia McDougall and Peter D. Renshaw / 265-284 \* Friends and enemies / Willard W. Hartup and Maurissa Abecassis / 286-306 \* Emotional and social development in childhood / Susanne Denham, Maria von Salisch, Tjeert Olthof, Anita Kochanoff and Sarah Caverly / 308-328 \* Social withdrawal and shyness / Kenneth H. Rubin, Kim B. Burgess and Robert J. Coplan / 330-352 Part VI: Social skills and social cognition \* Social skills and interpersonal perception in early and middle childhood / Antonius H. N. Cillessen and Amy D. Bellmore / 356-374 \* Social cognition / Carlie Lewis and Jeremy Cappendale / 376-393 \* Children's interpersonal skills and relationships in school settings: Adaptive significance and implications for school-based prevention and intervention programs / Gary W. Ladd, Eric S. Buhs and Wendy Troop / 394-415 Part VII: Play \* Understanding young children's pretend play in context / Artin Goncu, Michelle B. Patt and Emily Kouba / 418-437 \* Rough-and-tumble play from childhood through adolescence: Development and possible functions / Anthony D. Pellegrini / 437-453 Part VIII: Helping and moral reasoning \* Prosocial and helping behavior / Joan E. Grusec, Maayan Davidov and Leah Lundell / 457-474 \* Children's social and moral reasoning / Charles C. Helwig and Elliot Turiel / 476-490 \* Children's understanding of society / Martyn Barrett and Eithne Buchanan-Barrow / 492-512 Part IX: Cooperation, competition, aggression, and bullying \* Cooperation and competition / Jacques F. Richard, Ada Fonzi, Franca Tani, Fulvio Tassi, Giovanna Tomada and Barry H. Schneider / 515-532 \* Sticks and stones and social exclusion: Aggression among girls and boys / Marion K. Underwood / 533-548 \* Bullying in childhood / Ken Rigby / 549-568 Part X: Children with special needs \* The development of social competence in children with disabilities / Karen E. Diamond / 572-587 \*

Social development in children with specific language impairment and profound hearing loss / Bonnie Brinton and Martin Fujiki / 588-603 Index

KW - PsycInfo

KW - Rough and Tumble

KW - Childhood Development

KW - Psychosocial Development

RP - NOT IN FILE

SP - 665

JF - (2002)

VL - Blackwell handbook of childhood social development. xv, 665 pp. Malden

N2 - (create) This handbook describes the specifics of childhood social development. It considers all aspects of social development, including play, genetics, culture, family, peers, social skills and social cognition, moral reasoning, cooperation, competition, aggression, bullying, and children with special needs. The book also provides a historical overview of childhood social development and the various movements that have existed over time. (PsycINFO Database Record (c) 2012 APA, all rights reserved)

AD - Smith, Peter K.: Goldsmiths Coll, London, England Hart, Craig H.: Brigham Young U, Provo, UT, US

ER -

TY - JOUR

ID - 1165

T1 - Rough-and-tumble between parents and children and children's social competence

A1 - Mellen, Henry S.

Y1 - 2002///

N1 - Dissertation Abstract: 2002-95018-125

English

Dissertation Abstract

KW - PsycInfo

KW - Rough and Tumble

KW - Childhood Play Behavior

KW - Parent Child Relations

KW - Social Skills

RP - NOT IN FILE

SP - Sep

JF - Dissertation Abstracts International: Section B: The Sciences and Engineering

VL - .63

IS - 3-B

N2 - The purpose of this study was to determine whether rough-and-tumble was a dimension of parent-child physical play and whether parent-child rough-and-tumble was related to preschool children's social competence. Participants were 157 married parents and 56 preschool teachers from the suburbs of a large northeastern metropolis. The core hypothesis was that father-son rough-and-tumble would be related to sons' social competence. It was predicated on the example of playground rough-and-tumble, a predominantly male activity that has been linked with the social competence of schoolboys. Both parents completed the Physical Play Questionnaire. The PPQ was a measure developed by the researcher to quantify frequencies of parent-child physical play. Fathers, mothers, and teachers rated preschool children with the Social Competence and Behavior Evaluation. Additionally, fathers and mothers filled out the Ray Directiveness Scale. Parental directive behavior was believed to be a mediating variable. Rough-and-tumble emerged as one of four principal factors of physical play between parents and preschool children. Fathers and sons rough-and-tumbled approximately twice as much as mothers and daughters, respectively. Father-son rough-and-tumble was not associated with son's social competence, but father-son intimate physical play was. (Parental directiveness had no material effect on any relation). Additional analyses revealed that father-son rough-and-tumble behaviors that involved direct body contact were related moderately with sons' social competence and very strongly with 3-year-old sons' social competence. No kind of parental physical play was linked with daughters' social competence. The results of this study confirm that rough-and-tumble was both an intergenerational and domestic phenomenon. The quality of father-son rough-and-tumble was as critical to the contribution to sons' social competence as was the frequency. Because its benefits were both age- and gender-specific, rough-and-tumble emerged as an important factor for

future research into the developmental course of parent-child play and parental gender-role socialization of children. (PsycINFO Database Record (c) 2012 APA, all rights reserved)

SN - 0419-4217

AD - Mellen, Henry S.: Adelphi U, Inst Advanced Psychological Studies, US

ER -

TY - JOUR

ID - 1166

T1 - Beyond rough and tumble: Low-income fathers' interactions and children's cognitive development at 24 months. [References]

A1 - Shannon, Jacqueline D.

Y1 - 2002///

N1 - Peer Reviewed Journal: 2002-01103-001

English

Journal; Peer Reviewed Journal

KW - PsycInfo

KW - Rough and Tumble

KW - Cognitive Development

KW - Father Child Relations

KW - Lower Income Level

RP - NOT IN FILE

SP - Apr

EP - Jun

JF - Parenting: Science and Practice

VL - .2

IS - 2

N2 - Investigated associations between father-child interactions and children's cognitive status in low-income, ethnically diverse families. Ss were 65 inner-city fathers (aged 18-46 yrs) and their 24-mo-old children. Interactions were videotaped at home during semistructured free play, and mental scale scores on the Bayley Scales of Infant Development were obtained on children. The quality of interactions was assessed using Likert ratings of both the fathers and children. Factor analyses reveal 2 patterns of engagement in fathers (Responsive-Didactic and Negative-Intrusive) and 3 in children (Playful-Communicative, Social, and Regulated). 36 children scored within normal limits on the Mental Development Index and 29 scored in the delayed range. Together, fathers' and children's factor scores explained more than 25% of the variance in children's performance on the MDI. Logistic regressions indicate that fathers with high scores on the Responsive-Didactic factor were nearly 5 times more likely to have children within the normal range on the MDI than were low-scoring fathers. Definitions from the Caregiver-Child Affect, Responsiveness, and Engagement Scale are appended. (PsycINFO Database Record (c) 2012 APA, all rights reserved)

SN - 1529-5192

AD - Shannon, Jacqueline D.: New York U, Dept of Applied Psychology, New York, NY, US Tamis-

LeMonda, Catherine S.: New York U, Dept of Applied Psychology, New York, NY, US London, Kevin: New York U, New York, NY, US Cabrera, Natasha: National Insts of Health, National Inst of Child Health & Human Development, Bethesda, MD, US

ER -

TY - JOUR

ID - 1167

T1 - Comparing pupil and teacher perceptions for playful fighting, serious fighting, and positive peer interaction. [References]

A1 - Smith, Peter K.

Y1 - 2002///

N1 - Book: 2002-00366-014

English

Book; Edited Book

KW - PsycInfo

KW - Rough and Tumble

KW - Aggressive Behavior  
 KW - Childhood Play Development  
 KW - Social Interaction  
 KW - Students  
 KW - Teachers  
 RP - NOT IN FILE  
 SP - social  
 EP - cognitive  
 JF - Roopnarine, Jaipaul L [Ed]  
 IS - 2002

N2 - (from the chapter) Compares children's and teacher's perspectives on playfighting and real fighting in primary schools in England. The study focused on boys, as they are more heavily involved in playfighting. The authors first report on the children's views on playfighting and then report some teacher views. Pupil-teacher agreement on playfighting, real fighting, and positive social interaction are compared, to see if agreement is less regarding playfighting than the other two domains. A majority of boys enjoy playfighting, thinking its quite fun and doing it quite often. They know the difference from real fighting quite clearly. Teachers have rather negative views of playfighting. They think that about one-third of playfights turn into real fights. Teachers agreed with boys on ratings of positive social interaction, and (moderately) on frequency of aggression, but did not agree on frequency of playfighting; they confounded frequency of playfighting with frequency of aggression. The authors conclude that it does seem important that teachers, and trainee teachers, get more information on rough-and-tumble play and playfighting on the basis of the existing research in order to combat their misconceptions. (PsycINFO Database Record (c) 2012 APA, all rights reserved)

AD - Smith, Peter K.: U London, Goldsmiths Coll, Unit for School & Family Studies, United Kingdom Smees, Rebecca: U London, Inst of Education, United Kingdom Pellegrini, Anthony D.: U Minnesota, Twin Cities Campus, MN, US Menesini, Ersilia: U Florence, Dept of Psychology, Florence, Italy  
 ER -

TY - JOUR  
 ID - 1168  
 T1 - Rough and tumble play in children: Research and theory  
 A1 - Boulton, Michael J.  
 Y1 - 1989///  
 N1 - Peer Reviewed Journal: 1990-14439-001

English

Journal; Peer Reviewed Journal

KW - PsycInfo  
 KW - Rough and Tumble  
 KW - Aggressive Behavior  
 KW - Childhood Development  
 KW - Childhood Play Behavior  
 KW - Age Differences  
 KW - Cross Cultural Differences  
 KW - Human Sex Differences  
 RP - NOT IN FILE

SP - 79

EP - 91

JF - Infancia y Aprendizaje / Journal for the Study of Education and Development

VL - .48 1989, pp. 79-91.

N2 - Reviews studies of rough-and-tumble (R&T) play among children and argues that there may be considerable variation between children of different cultural and social class backgrounds. R&T is primarily a friendly and playful activity that does not usually involve any intent to hurt, at least up to early adolescence. Its function remains unclear, but it appears to be part of normal development, and children who rough-and-tumble a lot are generally sociable but not especially aggressive. To this extent, there seems no reason to discourage R&T except in contexts where the noisy and vigorous activities might distract from other (e.g., educational) objectives. Discussed are age and sex differences in R&T, environmental influences on R&T, developmental



changes in the choice of partners in R&T, and R&T and aggression. (Spanish abstract) (PsycINFO Database Record (c) 2014 APA, all rights reserved)

SN - 0210-3702

AD - Boulton, Michael J.: U Sheffield, England

ER -

TY - JOUR

ID - 1169

T1 - Distinguishing serious playful fighting by children with learning disabilities and nondisabled children.

[References]

A1 - Nabuzoka,Dabie

Y1 - 1999///

N1 - Peer Reviewed Journal: 1999-11886-005

English

Journal; Peer Reviewed Journal

KW - PsycInfo

KW - Rough and Tumble

KW - Aggressive Behavior

KW - Childhood Play Behavior

KW - Cognitive Ability

KW - Learning Disabilities

RP - NOT IN FILE

SP - Sep

EP - 890

JF - Journal of Child Psychology and Psychiatry

VL - .40

IS - 6

N2 - The ability to distinguish serious from playful fighting by 39 children with learning disabilities (LD; mean age = 9.3 and 11.8 yrs) and 21 non-LD children (mean age = 10.1 yrs) was examined. Ss watched a videorecording of 19 episodes of behavior originally developed and used by J. J. Boulton (1988), which assessed the ability to distinguish between rough-and-tumble play and serious fighting. Children with LD were generally able to make this distinction, with older children being more accurate. However, the performance of children with LD was not as high as that of non-LD children. On the other hand, the order in frequency of those criteria cited was similar for both non-LD children and children with LD. Physical actions of the participants, and inference about actions and/or intent were the most frequently cited criteria. These findings indicate that although children with LD use fewer social cues, and are less accurate in making judgements about the nature of behavioural episodes, the acquisition of the meaning of particular cues may follow the same sequence as for non-LD children. Possible delays in the social cognitive development of children with LD, and their implications for the social adjustment of these children, are discussed. (PsycINFO Database Record (c) 2013 APA, all rights reserved)

SN - 0021-9630

AD - Nabuzoka, Dabie: Sheffield Hallam U, School of Health & Community Studies, Sheffield, England

ER -

TY - JOUR

ID - 1171

T1 - How cigarettes are advertised in magazines: Special messages for special markets

A1 - Basil,Michael D.

Y1 - 1991///

N1 - Peer Reviewed Journal: 1991-29084-001

English

Journal; Peer Reviewed Journal

KW - PsycInfo

KW - Rough and Tumble

KW - Advertising

KW - Consumer Research

KW - Magazines

KW - Tobacco Smoking

RP - NOT IN FILE

SP - 1991, pp

EP - 91

JF - Health Communication

VL - .3

IS - 2

N2 - Extended content analyses of magazines by D. G. Altman et al (1987) to examine how the tobacco industry segments its audience based on demographics and smoking behavior and attempts to reach each through specialized magazines and copy. Data from a market research bureau on magazines representing 5 readership demographic categories (youth, women, Blacks, men, and general-adult) were used. The focus of the majority of ads appeared to depend on the segment's current rate of smoking and attributes of the product being offered. In accord with psychographic theories, significant content differences were found in magazines read by different market segments. Horseplay was targeted at female, poorer, and younger readers; overtly sexual appeals and coy model poses were aimed at female, Black, and poorer readers more often than at men or general audiences. (PsycINFO Database Record (c) 2013 APA, all rights reserved)

SN - 1041-0236

AD - Basil, Michael D.: Stanford U, CA, US

ER -

TY - JOUR

ID - 1175

T1 - Changing a schoolyard: Intentions, design decisions, and behavioral outcomes

A1 - Weinstein,Carol S; Pinciotti,Patricia

Y1 - 1988///

N1 - Peer Reviewed Journal: 1988-37338-001

English

Journal; Peer Reviewed Journal

KW - PsycInfo

KW - Rough and Tumble

KW - Childhood Play Behavior

KW - Environmental Planning

KW - Playgrounds

KW - School Environment

KW - Elementary School Students

KW - Kindergarten Students

RP - NOT IN FILE

SP - May

EP - 371

JF - Environment and Behavior

VL - .20

IS - 3

N2 - Describes the construction of a tire playground on an empty, fenced-in blacktop that had served as the schoolyard. Parents' and designer's goals for the playground and the way the playground design supported and reflected these goals are described. The eventual impact on children's (approximately 400 kindergartners through 3rd graders) behavior is documented: There were significant decreases in organized games, uninvolved behavior, and roughhousing, and significant increases in active and pretend play. Age and sex differences in play behavior are also described. (PsycINFO Database Record (c) 2012 APA, all rights reserved)

SN - 0013-9165

AD - Weinstein, Carol S.: Rutgers U Graduate School of Education, New Brunswick, NJ, US

ER -

TY - JOUR

ID - 1178

T1 - Differences of sex and sexual orientation in the human anterior commissure

A1 - Lasco, Mitchell Stuart

Y1 - 2001///

N1 - Dissertation Abstract: 2001-95016-246

English

Dissertation Abstract

KW - PsycInfo

KW - Rough and Tumble

KW - Brain

KW - Gender Identity

KW - Limbic System

KW - Sexual Development

KW - Sexual Orientation

KW - Human Sex Differences

RP - NOT IN FILE

SP - Aug

JF - Dissertation Abstracts International: Section B: The Sciences and Engineering

VL - .62

IS - 2-B

N2 - Connectivity within the limbic brain may be one possible biological influence on personality and early social-sexual development. Evidence suggests that the amygdala, a limbic structure implicated in mediating social behaviors, plays a role in determining a child's willingness to engage in social activities, including rough play. Building on Dayrl Bem's "Exotic Becomes Erotic" (EBE) theory of the origins of sexual orientation, a model of biological and social variables in eroto-sexual development is put forward. In EBE theory, biological factors influence adult sexual orientation only indirectly, by influencing personality. Interest in rough play is one example of a personality variable which is gender-typed by society and may thus influence the eroto-sexual development of the individual. The development of neuronal connections from the amygdala to other limbic brain structures (e.g. cingulate cortex and septal nuclei), leads to the normal development of greater social inhibition, and fear of strangers. Many of these connecting fibers pass through the anterior commissure (AC). By examining variability in the midsagittal cross-sectional area of the AC, the present study looked for correlations with gender and partner preference. Previous studies have reported differences in the AC associated with gender and partner preference, however, the studies conflict in their findings, and independent labs have failed to replicate any of the reports. Midsagittal AC measurements were taken from 57 presumed heterosexual males, 18 of whom were HIV positive, and 43 females, 9 of whom were HIV positive, and 20 HIV positive males with a known history of homosexual behavior. Unlike previous studies, there were no correlations between the AC measurements and either gender or partner-preference. Furthermore, there were no correlations found with the AC measurements and possibly confounding variables such as HIV status, age, or brain weight. The tremendous variability in midsagittal cross-sectional size of the AC is one consideration in these results. The lack of independent replication of the previous reports of AC differences associated with gender and sexual orientation, underscores the importance of replication before any findings are accepted as fact. (PsycINFO

Database Record (c) 2012 APA, all rights reserved)

SN - 0419-4217

AD - Lasco, Mitchell Stuart: New York U., US

ER -

TY - JOUR

ID - 1179

T1 - The expression of care in the rough and tumble play of boys. [References]

A1 - Reed, Tom

Y1 - 2001///

N1 - Peer Reviewed Journal: 2001-14712-008

English

Journal; Peer Reviewed Journal

KW - PsycInfo

KW - Rough and Tumble

KW - Aggressive Behavior

KW - Childhood Play Behavior

KW - Friendship

KW - Intimacy

KW - Psychosocial Development

KW - Human Males

RP - NOT IN FILE

SP - Fal

EP - Win

JF - Journal of Research in Childhood Education

VL - .15

IS - 1

N2 - Examined pre-adolescent boys participating in rough and tumble play (RTP) and the ways in which they express care and intimacy as a result of their participation. Observations were conducted in a youth center for school-age children. Ss were 7 boys (aged 6-9 yrs) who were selected as a result of their sustained play in a game that encompassed RTP behaviors and exhibited evidence of caring. Methodology involved the Ss being videotaped while engaging in their favorite RTP in their natural surroundings. Ss were also asked to view the videotapes and offer their personal interpretation of the RTP experience. The criteria for identifying and recording an episode as RTP included reciprocal role taking, the play face, vigorous movement, and alternating between the roles of victim and victimizer. Ss were videotaped during a 10-day period (3 hrs each day). In all, 119 demonstrations of RTP were observed, taped, and analyzed. The results indicate that RTP is a means by which boys express care and intimacy for one another. Also, Ss were clear on where and when it was appropriate to express care and intimacy for one another. These findings suggest a need to reconsider the importance of RTP as 1 way boys express care, fondness, and friendship toward each other. (PsycINFO Database Record (c) 2012 APA, all rights reserved)

SN - 0256-8543

AD - Reed, Tom: U South Carolina, Spartanburg, SC, US

ER -

TY - JOUR

ID - 1180

T1 - The effect of network and public television programs on four and five year olds ability to attend to educational tasks

A1 - Geist,Eugene A.

Y1 - 2000///

N1 - Peer Reviewed Journal: 2001-14018-007

English

Journal; Peer Reviewed Journal

KW - PsycInfo

KW - Rough and Tumble

KW - Attention Span

KW - Classroom Behavior

KW - Education

KW - Television Viewing

RP - NOT IN FILE

SP - Dec

EP - 261

JF - Journal of Instructional Psychology

VL - .27

IS - 4

N2 - Examined the effect of network and public television programs on children's 1) ability to attend to a task, 2) children's time on task, and 3) engagement in rough and tumble play. 62 children (aged 4-5 yrs) were randomly assigned to 1 of 3 groups. One group watched Mister Rodgers' Neighborhood, a Public television program, one group watched The Mighty Morphin Power Rangers, a network television program, and one group watched no television for the treatment period and instead played with instructional materials. Results show that there was no significant difference on the attention variables between the Public television group and the instructional activities group. However, the network television program showed a significant difference with

both the other groups. No differences were found on the rough and tumble variable. (PsycINFO Database Record (c) 2012 APA, all rights reserved)

SN - 0094-1956

AD - Geist, Eugene A.: Ohio U, Athens, OH, US

ER -

TY - JOUR

ID - 1181

T1 - Preschool children's negotiation of intersubjectivity during rough-and-tumble play

A1 - Dewolf, Donna Michele

Y1 - 2000///

N1 - Dissertation Abstract: 2000-95010-393

English

Dissertation Abstract

KW - PsycInfo

KW - Rough and Tumble

KW - Childhood Play Behavior

KW - Negotiation

KW - Subjectivity

RP - NOT IN FILE

SP - May

JF - Dissertation Abstracts International: Section B: The Sciences and Engineering

VL - .60

IS - 11-B

N2 - This current study included an exploratory component, as well as, a confirmatory component. The exploratory component of the study involved developing an understanding of how children negotiate intersubjectivity during rough-and-tumble play (R&T play). Utilizing participant observation, the researcher described the context and the experiences of children as they jointly negotiated a shared understanding during R&T play. The researcher discovered, in R&T play, a structure and level of shared thinking among participants similar to other types of social play. The confirmatory component of the study involved conducting analyses on certain child characteristics as they related to participation in R&T play episodes. A portion of the findings from this aspect of the study corroborated findings from previous research. (PsycINFO Database Record (c) 2012 APA, all rights reserved)

SN - 0419-4217

AD - Dewolf, Donna Michele: The Louisiana State U And Agricultural And Mechanical Coll., US

ER -

TY - JOUR

ID - 1183

T1 - Hand signalling in dyadic proximal communication: Social strengths of children with autism who do not speak. [References]

A1 - Whittaker, Christopher A.

Y1 - 2000///

N1 - Peer Reviewed Journal: 2000-07682-003

English

Journal; Peer Reviewed Journal

KW - PsycInfo

KW - Rough and Tumble

KW - Autism

KW - Gestures

KW - Interpersonal Communication

KW - Learning Disabilities

RP - NOT IN FILE

SP - Feb

EP - 57

JF - Child Language Teaching and Therapy

VL - .16

IS - 1

N2 - A hand-signalling procedure was taught to 4 boys (aged 48-105 mo) with severe autism and learning disabilities, within dyadic proximal communication with an adult who was a stranger to them. Proximal communication involved rough and tumble play and imitation of the child, with frequent pause/burst phases to encourage him to initiate communication. It builds on the social strengths of the children and is discussed in relation to the prevailing deficit model of autism. High frequencies of hand signalling were shown by each child and sustained over time. A behavioral explanation was rejected in favor of a developmental one involving Piaget's concept of operational causality. (PsycINFO Database Record (c) 2012 APA, all rights reserved)

SN - 0265-6590

AD - Whittaker, Christopher A.: U Durham, School of Education, Durham, England

ER -

TY - JOUR

ID - 1184

T1 - The mystery of ticklish laughter

A1 - Harris,Christine R.

Y1 - 1999///

N1 - Peer-Reviewed Status-Unknown: 2001-17508-001

English

Journal; Peer-Reviewed Status-Unknown

KW - PsycInfo

KW - Rough and Tumble

KW - Laughter

KW - Pleasure

KW - Tactual Perception

KW - Tactual Stimulation

KW - Interpersonal Interaction

KW - Pain

KW - Physical Contact

KW - Reflexes

KW - Theory of Evolution

RP - NOT IN FILE

SP - 1999, pp

EP - 1999,351

JF - American Scientist

VL - .87

IS - 4

N2 - Investigated whether tickling is evolutionary, pleasure, pain, a social response, or a reflex. This is done by discussing the ontogeny, sociality and physiology of tickle and the laughter it induces. The author concludes by suggesting evolutionary psychological and physiological bases for tickling. These suggestions include: tickling may help facilitate the bond between parent and offspring; being ticklish in spots that are vulnerable in arm-to-arm combat confers an adaptive advantage by motivating individuals to protect these areas; and that the disconnection between positive outward expression (that encourages the tickling) and negative inward feeling (discomfort) motivates the growing child or ape to develop combat skills in much the same way that other rough-and-tumble play does. (PsycINFO Database Record (c) 2012 APA, all rights reserved)

SN - 0003-0996

AD - Harris, Christine R.: U California-San Diego, Dept of Psychology, La Jolla, CA, US

ER -

TY - JOUR

ID - 1185

T1 - Relationships between motivational climate and satisfaction, perceived ability and fairplay attitudes in young soccer players. [Spanish]

A1 - Angles,Merce

Y1 - 1999///

N1 - Peer Reviewed Journal: 2001-00061-002

Spanish

Journal; Peer Reviewed Journal

KW - PsycInfo

KW - Rough and Tumble

KW - Achievement

KW - Athletic Performance

KW - Goals

KW - Motivation

KW - Soccer

KW - Athletes

KW - Psychological Theories

RP - NOT IN FILE

SP - 1999, pp

EP - 64

JF - Revista de Psicología Social Aplicada

VL - .9

IS - 1

N2 - Conducted a study to confirm the relationships proposed by motivation theory based on goal perspectives. 176 soccer players aged 9-14 yrs in Spain were administered the Perceived Motivational Climate in Sports Questionnaire (J. J. Seifriz et al, 1992) and questionnaires on satisfaction, perceived ability, and attitudes about fair play. Principal component factor analysis with varimax rotation and canonical correlation analysis were performed, and Pearson's correlation coefficient was calculated. The results support the motivational theory of achievement goals in sports. The perception of a task-associated motivational climate was related to a high level of satisfaction with training, with perceived ability more self-referenced than normative and with a favorable attitude towards enjoyment. However, the perception of an ego-associated motivational climate was related to the perception of ability based on normative criteria, with favorable attitudes towards rough play and victory in soccer games, a low level of satisfaction with training, and an unfavorable attitude towards enjoyment.

(PsycINFO Database Record (c) 2012 APA, all rights reserved)

SN - 1131-6225

AD - Boixados i Angles, Merce: U Autonoma de Barcelona, Psicobiologia i Metodologia de les Ciencies de la Salut, Bellaterra, Spain

ER -

TY - JOUR

ID - 1186

T1 - Young children's conflicts and teachers' perspectives on them. [References]

A1 - Smith, Anne B.

Y1 - 1999///

N1 - Peer Reviewed Journal: 2000-07672-004

English

Journal; Peer Reviewed Journal

KW - PsycInfo

KW - Rough and Tumble

KW - Aggressive Behavior

KW - Childhood Play Behavior

KW - Conflict

KW - Peer Relations

KW - Teacher Student Interaction

KW - Child Care Workers

KW - Child Day Care

KW - Preschool Teachers

RP - NOT IN FILE

SP - 1999, pp

EP - 1999,348

JF - New Zealand Journal of Educational Studies

VL - .34

IS - 2

N2 - Examined infant peer conflicts and teachers' perspectives concerning conflict management. In Exp 1, 200 children (aged 1-26 mo) attending childcare centers were observed for the incidence, context, and nature of conflict. Results show that 2/3 of Ss were involved in a conflict episode within a 20-min period, with only a sixth of all conflicts involving hostile intentional aggression. No gender differences were observed in type, content, consequences, or strategy of dealing with conflict. In Exp 2, 30 early childhood teachers completed interviews regarding their views of child conflict. Results show that conflict was seen to be a very positive opportunity for children to learn, rough-and-tumble play was seen as moderately positive, and aggression was seen more negatively. Teachers were more likely to intervene when judging children to be physically at risk and believed that peer interactions needed careful monitoring. (PsycINFO Database Record (c) 2012 APA, all rights reserved)

SN - 0028-8276

AD - Smith, Anne B.: U Otago, Children's Issues Ctr, Dunedin, New Zealand

ER -

TY - JOUR

ID - 1187

T1 - Bargaining for advantage: Negotiation strategies for reasonable people

A1 - Shell,G.

Y1 - 1999///

N1 - Book: 2000-03854-000

English

Book; Authored Book

(Created by PsycINFO) Acknowledgments Introduction: It's your move Part I: The six foundations of effective negotiation The first foundation: Your bargaining style The second foundation: Your goals and expectations The third foundation: Authoritative standards and norms The fourth foundation: Relationships The fifth foundation: The other party's interests The sixth foundation: Leverage Part II: The negotiation process Step 1: Preparing your strategy Step 2: Exchanging information Step 3: Opening and making concessions Step 4: Closing and gaining commitment Bargaining with the devil without losing your soul: Ethics in negotiation Conclusion: On becoming an effective negotiator Appendix A: A note on your personal negotiation style Appendix B: Information-based bargaining plan Notes Selected bibliography Index

KW - PsycInfo

KW - Rough and Tumble

KW - Negotiation

KW - Strategies

RP - NOT IN FILE

SP - 286

JF - (1999)

VL - Bargaining for advantage

N2 - (from the cover) The author has taught thousands of business leaders, administrators, and other professionals how to survive and thrive in the sometimes rough-and-tumble world of negotiation. His systematic, step-by-step approach comes to life in this book, which combines lively storytelling, proven tactics, and reliable insights gleaned from the latest negotiation research. Shell's approach, which begins with a candid self-assessment of an individual's personal strengths and weaknesses, helps everyone from the inexperienced, anxious negotiator to the seasoned veteran. Readers will learn to (1) succeed even when they think they are short on bargaining power, (2) counter hardball tactics and tricks without compromising their ethics, (3) building trust in working relationships, (4) improve their leverage at each stage of the process, and (5) decide when to compromise. Laced with stories about some of the best negotiators of all time-including Benjamin Franklin, J. P. Morgan, Sony's Akio Morita, and Donald Trump-this how-to-guide gives readers the tools they need to become a skillful negotiator in every aspect of their lives. (PsycINFO Database Record (c) 2012 APA, all rights reserved)

AD - Shell, G. Richard: U Pennsylvania, Wharton School of Business, Philadelphia, PA, US

ER -

TY - JOUR



ID - 1188

T1 - Mothers' memories of childhood peer experiences: Associations to child-rearing behaviours and children's social competence

A1 - Mohr, Shelley Lynn

Y1 - 1999///

N1 - Dissertation Abstract: 1999-95024-013

English

Dissertation Abstract

KW - PsycInfo

KW - Rough and Tumble

KW - Childrearing Practices

KW - Early Memories

KW - Mother Child Relations

KW - Peer Relations

KW - Social Skills

KW - Mothers

RP - NOT IN FILE

SP - Jan

JF - Dissertation Abstracts International: Section B: The Sciences and Engineering

VL - .60

IS - 6-B

N2 - The present study evaluated the utility of a proposed model which specified potential associations from mothers' memories of childhood peer experiences (specific and general) to mothers' child-rearing behaviours in the domains of involvement in children's peer relationships and parenting style, and to children's social competence. Gender of child was also considered to influence these associations. Questionnaire data was gathered from 203 mother-(preschool)child dyads. Memories were measured by mothers' narrative recall of a specific peer experience, as well as by responses to a number of questions pertaining to mothers' general recall of peer acceptance, loneliness, as well as aggressive peer experiences. Measures of maternal depression, education, and mothers' value of children's sociability, and parenting style were also obtained. A two-factor measure of mothers' involvement in children's peer relations was yielded from Cohen's (1989) "Parental Involvement Checklist". Children's social competence was multiply determined by both mothers' and teachers' ratings. Results of multivariate analyses suggested that mothers who reported a specific peer memory were less likely to have children whom teachers rated as engaging in high levels of rough and tumble play. Additionally, children of mothers who reported specific anxious-lonely memories were the most popular amongst their peers, according to teachers. Results of hierarchical regression analyses suggested that mothers' aggressive memories were associated with authoritarian parenting behaviours, which were, in turn, associated with children's rough play, aggressive, and anxious behaviour. A trend was also observed for mothers with general memories of lonely peer experiences to be more directly involved in children's peer relations, which was, in turn, associated with children's reticent play, aggressive and anxious behaviour. Mothers' general memories of peer acceptance were positively associated with children's peer acceptance (according to mothers) while mothers' general aggressive memories tended to be positively associated with children's aggressive behaviour (according to mothers). Contrary to predictions, gender effects were not elucidated in these associations. Processes by which mothers' memories of childhood peer relationships may affect parental efficacy and childrearing behaviours were discussed. Additionally, the importance of discriminating specific peer memories from more general recall of peer memories, was discussed within this context, as well as an important consideration for future research. (PsycINFO Database Record (c) 2012 APA, all rights reserved)

SN - 0419-4217

AD - Mohr, Shelley Lynn: Carleton U., Canada

ER -

TY - JOUR

ID - 1189

T1 - Recreational activities of students with mental retardation in three types of schoolyards. [French].

[References]

A1 - Dore, Robert; Dion, Eric; Chapdelaine, Therese; Brunet, Jean-Pierre; Wagner, Serge

Y1 - 1999///

N1 - Peer Reviewed Journal: 1999-11887-003

French

Journal; Peer Reviewed Journal

KW - PsycInfo

KW - Rough and Tumble

KW - Childhood Play Behavior

KW - Mainstreaming (Educational)

KW - Playgrounds

KW - Special Education

KW - Elementary School Students

KW - Intellectual Development Disorder

RP - NOT IN FILE

SP - Jun

EP - 53

JF - Revue Francophone de la Deficience Intellectuelle

VL - .10

IS - 1

N2 - Studied the effect of the elementary school playground on the social and solitary activities of students with mental retardation who learn in regular classrooms, special classrooms in a regular school, or a special school. 26 moderately mentally retarded elementary school students (mean age 9 yrs) who attended regular classes (10 Ss), a special class in a regular school (8 Ss), or a special school (8 Ss) in Canada were observed during at least 1 recreational period lasting at least 15 min. One O was present in about 85% of cases, and 2 Os were present in about 15% of cases. Compared with Ss from special classrooms or a special school, Ss from regular classrooms had more opportunities to interact with normal peers during recess (although their school playground offered less play-related materials than playgrounds designed for mentally retarded students), were more involved in group play, and demonstrated less rough play and less solitary play. However, Ss in all 3 environments often were alone and unoccupied during recess. (PsycINFO Database Record (c) 2012 APA, all rights reserved)

SN - 0847-5733

AD - Dore, Robert: U Quebec a Montreal, Dept des Sciences de l'Education, Montreal, Canada

ER -

TY - JOUR

ID - 1190

T1 - Affective neuroscience: The foundations of human and animal emotions

A1 - Panksepp, Jaak

Y1 - 1998//

N1 - Book: 1999-02235-000

English

Book; Authored Book

(Created by PsycINFO) Part I: Conceptual background Affective neuroscience: History and major concepts Emotional operating systems and subjectivity: Methodological problems and a conceptual framework for the neurobiological analysis of affect The varieties of emotional systems in the brain: Theories, taxonomies, and semantics Neurostatics: The anatomy of the brain/mind Neurodynamics: The electrical languages of the brain Neurodynamics: Neurochemical maps of the brain Part II: Basic emotional and motivational processes Sleep, arousal, and mythmaking in the brain SEEKING systems and anticipatory states of the nervous system Energy is delight: The pleasures and pains of brain regulatory systems Nature red in tooth and claw: The neurobiological sources of rage and anger The sources of fear and anxiety in the brain Part III: The social emotions The varieties of love and lust: Neural control of sexuality Love and the social bond: The sources of nurturance and maternal behavior Loneliness and the social bond: The brain sources of sorrow and grief Rough-and-tumble play: The brain sources of joy Emotions, the higher cerebral processes, and the SELF: Some are born to sweet delight, some are born to endless night Appendix A: Bones, brains, and human origins Appendix B: The brain, language, and affective neuroscience Appendix C: Dualism in the neurosciences Notes Author index Subject index

KW - PsycInfo

KW - Rough and Tumble

KW - Brain

KW - Emotions  
 KW - Mind  
 KW - Motivation  
 KW - Neurobiology  
 KW - Mammals  
 KW - Neuroanatomy  
 KW - Neurochemistry  
 KW - Neurophysiology  
 RP - NOT IN FILE  
 SP - 466  
 JF - (1998)

VL - Affective neuroscience

N2 - (from the jacket) In this book, the author provides up-to-date information about the brain-operating systems that organize the fundamental emotional tendencies of all mammals. Presenting complex material in a readable manner, the book offers a comprehensive summary of the fundamental neural sources of human and animal feelings, as well as a conceptual framework for studying emotional systems of the brain. Panksepp approaches emotions from the perspective of basic emotion theory but does not fail to address the complex issues raised by constructionist approaches. These include relations to human consciousness and the psychiatric implications of this knowledge. Representing a synthetic integration of vast amounts of neurobehavioral knowledge, including relevant neuroanatomy, neurophysiology, and neurochemistry, this book makes an important contribution to understanding the biology of emotions. (PsycINFO Database Record (c) 2012 APA, all rights reserved)

AD - Panksepp, Jaak: Bowling Green State U, Bowling Green, OH, US

ER -

TY - JOUR

ID - 1191

T1 - Gender segregation in early childhood: A test of the play style compatibility hypothesis

A1 - Tietz, Julie Ann

Y1 - 1998///

N1 - Dissertation Abstract: 1998-95018-112

English

Dissertation Abstract

KW - PsycInfo

KW - Rough and Tumble

KW - Childhood Play Behavior

KW - Human Sex Differences

KW - Interpersonal Interaction

RP - NOT IN FILE

SP - Sep

JF - Dissertation Abstracts International: Section B: The Sciences and Engineering

VL - .59

IS - 3-B

N2 - Maccoby and Jacklin (1987) have suggested that gender segregation occurs for reasons other than a simple socialization explanation; rather, differences in interactional styles may cause children to prefer playmates of the same sex, leading to segregated play. Boys have often been found to display rough and tumble and verbally dominant behaviors during social interactions, whereas girls are more likely to engage in more socially skilled activities. According to the play style compatibility hypothesis, girls find boys' play style to be aversive and thus segregate according to gender during play. Cognitive factors, such as awareness of gender categories, are also thought to play a role. Research up to this point has been largely observational. The current study used an experimental manipulation to test the play style compatibility hypothesis. Preschool boys and girls were shown videotaped clips of other preschoolers playing in one of three play styles: (1) rough and tumble, (2) verbally dominating, or (3) friendly (neither rough and tumble nor verbally dominating). Participants were asked which of the videotaped models they preferred. Younger children were expected to base preferences on play styles; that is, females were expected to prefer models demonstrating friendly play, whereas males were expected to prefer models demonstrating rough and tumble or verbally dominating play. Older children were expected to

base preferences on gender; that is, females were expected to prefer female models, and males were expected to prefer male models because they have learned to associate preferred play styles with a particular gender. When comparing rough and tumble play versus friendly play, younger participants preferred rough and tumble play in females but friendly play in males; when comparing verbally dominant play versus friendly play, there was limited support for the hypothesis that younger females would prefer friendly play whereas younger males would prefer verbally dominant play. Older participants did display the predicted same-sex bias; furthermore, friendly play was liked more than the other two styles, suggesting socialization effects in this age group.

(PsycINFO Database Record (c) 2012 APA, all rights reserved)

SN - 0419-4217

AD - Tietz, Julie Ann: Texas Tech U, US

ER -

TY - JOUR

ID - 1192

T1 - Stress and firefighters: An exploratory study

A1 - Ottlinger, James Michael

Y1 - 1998//

N1 - Dissertation Abstract: 1998-95004-125

English

Dissertation Abstract

KW - PsycInfo

KW - Rough and Tumble

KW - Coping Behavior

KW - Fire Fighters

KW - Occupational Stress

KW - Stress Management

RP - NOT IN FILE

SP - Feb

JF - Dissertation Abstracts International: Section B: The Sciences and Engineering

VL - .58

IS - 8-B

N2 - This study surveyed firefighters' perceptions of the causes of occupational stress. It also explored behavioral effects that could be experienced or exhibited by firefighters. The subjects of this research were 161 full-time firefighters and administrative fire department officers from six different fire departments. The results indicated that there was no significant relationship among the selected demographic variables (age, gender, rank, years of service, marital status, and level of education) and the causes of stress experienced and perceived by firefighters and the types of coping measures used by firefighters. Even though there was no significant relationship found, the study showed that stress does exist in the fire service today. The five most prominent perceived causes of stress were (a) a fellow firefighter dying on the job; (b) runs involving young people who are badly injured or killed; (c) after a fire, being second guessed by the authorities on the performance at the fire; (d) injuries to the other firefighters on the job; and (e) problems that continue to go on with nothing being done about them. The five most prominent mechanisms used to deal with stress were (a) horseplay, (b) sleep problems, (c) joking about and making fun of clients, (d) impatience with immature and ignorant people, and (e) complaining to each other about the other firefighters and the way they did the job. The findings point to a need to develop and utilize stress management and prevention programs designed to educate firefighters to stress-reduction techniques and help them to be aware of the signs and symptoms of stress. Improved communication skills are needed to avoid the pitfalls of withdrawal and excessive anxiety inherent in the firefighter occupation. (PsycINFO Database Record (c) 2012 APA, all rights reserved)

SN - 0419-4217

AD - Ottlinger, James Michael: Walden U, US

ER -

TY - JOUR

ID - 1193

T1 - Developmental changes in behavior and in steroid uptake by the male and female macaque brain

A1 - Michael, Richard P.

Y1 - 1998///

N1 - Peer Reviewed Journal: 1998-10117-004

English

Journal; Peer Reviewed Journal

KW - PsycInfo

KW - Rough and Tumble

KW - Animal Ethology

KW - Animal Sex Differences

KW - Neurochemistry

KW - Prenatal Development

KW - Sex Hormones

KW - Human Sex Differences

KW - Monkeys

RP - NOT IN FILE

SP - 1998, pp

EP - 1998,260

JF - Developmental Neuropsychology

JA - Dev Neuropsychol

VL - .14

IS - 2-3

N2 - Describes the sex differences in the development of play initiation, rough-and-tumble play, and mounting behavior in rhesus monkeys. The work of H. F. Harlow and colleagues (1959) demonstrated in rhesus monkeys the critical role of the early postnatal environment for the subsequent development of normal adult behavior; when infants are reared in social isolation, many aspects of their adult behavioral repertoire were disrupted. Even in adult primates reared in the wild, the behavioral effects of gonadal hormones are much influenced by such variables as kinship, duration of familiarity with conspecific, partner preferences, individual differences, dominance rank, and the amount and quality of space available. These and other factors can modulate hormonal effects in humans, and knowledge of the role of gonadal hormones during nonhuman primate development may also be viewed in this broader perspective. Topics discussed in this paper include sex differences in the behavior of adult macaques, behavioral effects of prenatal androgen administration, and the developmental changes in hormone uptake by the primate brain. (PsycINFO Database Record (c) 2012 APA, all rights reserved)

SN - 8756-5641

AD - Michael, Richard P.: Emory U, School of Medicine/Georgia Mental health Inst, Dept of Psychiatry & Behavioral Sciences, Atlanta, GA, US

ER -

TY - JOUR

ID - 1194

T1 - Physical activity play: Consensus and debate

A1 - Pellegrini, A.

Y1 - 1998///

N1 - Peer Reviewed Journal: 1998-10043-006

English

Journal; Peer Reviewed Journal

KW - PsycInfo

KW - Rough and Tumble

KW - Childhood Play Behavior

KW - Childhood Play Development

KW - Developmental Age Groups

KW - Exercise

KW - Human Sex Differences

KW - Age Differences

KW - Cognitive Development

KW - Physical Activity

KW - Physical Development

KW - Psychosocial Development

KW - Stereotyped Behavior

RP - NOT IN FILE

SP - Jun

EP - 610

JF - Child Development

JA - Child Dev.

VL - .69

IS - 3

N2 - Replys to comments by J. A. Byers (see record 1998-10043-002), L. McCune (see record 1998-10043-003), D. F. Bjorklund and R. D. Brown (see record 1998-10043-004), and P. Rosenbaum (see record 1998-10043-005) on our article (see record 1998-10043-001) which considers the nature and possible developmental functions of physical activity play. In that article, we distinguish 3 kinds of physical activity play, with consecutive age peaks: rhythmic stereotypies peaking in infancy, exercise play peaking during the preschool years, and rough-and-tumble (R & T) play peaking in middle childhood. In this reply, we consider areas of consensus, including the value of an evolutionary perspective and the utility of exploring variations in physical activity play. We also consider areas of debate, including the nonplay/play distinction, functions of R & T, and the opportunities of juveniles for exercise training. We call for more directed research in this neglected area of children's behavior and development. (PsycINFO Database Record (c) 2012 APA, all rights reserved)

SN - 0009-3920

AD - Pellegrini, A. D.: U Minnesota, Dept of Educational Psychology, Minneapolis, MN, US

ER -

TY - JOUR

ID - 1195

T1 - Physical activity play in children with disabilities: A neglected opportunity for research?

A1 - Rosenbaum, Peter

Y1 - 1998///

N1 - Peer Reviewed Journal: 1998-10043-005

English

Journal; Peer Reviewed Journal

KW - PsycInfo

KW - Rough and Tumble

KW - Childhood Play Behavior

KW - Childhood Play Development

KW - Developmental Age Groups

KW - Exercise

KW - Human Sex Differences

KW - Age Differences

KW - Cognitive Development

KW - Physical Activity

KW - Physical Development

KW - Psychosocial Development

KW - Stereotyped Behavior

RP - NOT IN FILE

SP - Jun

EP - 608

JF - Child Development

JA - Child Dev.

VL - .69

IS - 3

N2 - Comments on A. D. Pellegrini and P. K. Smith's article (see record 1998-10043-001) which considers the nature and possible developmental functions of physical activity play. Pellegrini and Smith distinguish 3 kinds of physical activity play, with consecutive age peaks: rhythmic stereotypies peaking in infancy, exercise play peaking during the preschool years, and rough-and-tumble play peaking in middle childhood. Function is considered in terms of beneficial immediate and deferred consequences in physical, cognitive, and social domains. Pellegrini and Smith suggest that forms of physical activity play serve primarily immediate

developmental functions. Studies of the development of children with disorders of motor function afford opportunities, as yet unexploited, to understand the importance of motor function to overall child development. Pellegrini and Smith's review provides a challenge to developmentalists from many disciplines to use this natural model of developmental variation to move the field forward. (PsycINFO Database Record (c) 2012 APA, all rights reserved)

SN - 0009-3920

AD - Rosenbaum, Peter: McMaster U, Faculty of Health Sciences, Hamilton, ON, Canada

ER -

TY - JOUR

ID - 1197

T1 - Immediate and ultimate functions of physical activity play

A1 - McCune,Lorraine

Y1 - 1998///

N1 - Peer Reviewed Journal: 1998-10043-003

English

Journal; Peer Reviewed Journal

KW - PsycInfo

KW - Rough and Tumble

KW - Childhood Play Behavior

KW - Childhood Play Development

KW - Developmental Age Groups

KW - Exercise

KW - Human Sex Differences

KW - Age Differences

KW - Cognitive Development

KW - Physical Activity

KW - Physical Development

KW - Psychosocial Development

KW - Stereotyped Behavior

RP - NOT IN FILE

SP - Jun

EP - 603

JF - Child Development

JA - Child Dev.

VL - .69

IS - 3

N2 - Comments on A. D. Pellegrini and P. K. Smith's article (see record 1998-10043-001) which considers the nature and possible developmental functions of physical activity play. Pellegrini and Smith distinguish 3 kinds of physical activity play, with consecutive age peaks: rhythmic stereotypies peaking in infancy, exercise play peaking during the preschool years, and rough-and-tumble play peaking in middle childhood. I suggest that play has been difficult to define because it occurs as an aspect of many activities rather than being limited to a specific kind of activity; thus it rarely occurs in isolation. Classic theorists such as Piaget and Vygotsky emphasize representational play as play in its purist form, but both the immediate and ultimate functions of play can be discerned in the simplest physical activity play. (PsycINFO Database Record (c) 2012 APA, all rights reserved)

SN - 0009-3920

AD - McCune, Lorraine: Rutgers U, Dept of Educational Psychology, New Brunswick, NJ, US

ER -

TY - JOUR

ID - 1199

T1 - War toy play and aggression in Dutch kindergarten children

A1 - Hellendoorn,Joop

Y1 - 1997///

N1 - Peer Reviewed Journal: 1998-00197-005

English

Journal; Peer Reviewed Journal

KW - PsycInfo

KW - Rough and Tumble

KW - Aggressive Behavior

KW - Childhood Play Behavior

KW - Toys

KW - Human Sex Differences

KW - Parent Child Relations

RP - NOT IN FILE

SP - Nov

EP - 354

JF - Social Development

VL - .6

IS - 3

N2 - The play behavior of 54 Dutch children (aged 4-7 yrs) in the presence of a standard set of war toys and neutral toys was related to 5 groups of variables: parental attitude, possession of war toys at home, the habitual aggressiveness of the child in daily life, the characteristics of the toys themselves, and the play situation. Results showed that real object- or person-oriented aggression was rare and was not related to play with the war toys. Suppression of aggression by the experimental situation seemed unlikely. During play, the levels of involvement and fantasy were generally high. Regularly, playful fighting was observed, differentiated as Make-Believe-Aggression and Rough-and-Tumble. These 2 Play 'Aggression' factors, and Real Aggression, could be predicted from other variables, principally from gender, the influence of session partners, play involvement, type of war toy used, and parental attitude. (PsycINFO Database Record (c) 2012 APA, all rights reserved)

SN - 0961-205X

AD - Hellendoorn, Joop: Leiden U, Dept of Education, Leiden, Netherlands

ER -

TY - JOUR

ID - 1200

T1 - The expression of care in the rough and tumble play of pre-adolescent boys

A1 - Reed, Thomas L.

Y1 - 1997///

N1 - Dissertation Abstract: 1997-95009-052

English

Dissertation Abstract

KW - PsycInfo

KW - Rough and Tumble

KW - Childhood Play Behavior

KW - Human Males

KW - Interpersonal Interaction

RP - NOT IN FILE

SP - May

JF - Dissertation Abstracts International Section A: Humanities and Social Sciences

VL - .57

IS - 11-A

N2 - Rough and tumble (R&T) play is widely researched in relationship to social affiliation and the cognitive benefits associated with participation in this type of play. One less researched aspect of R&T play is the affective dimension, more specifically, the way in which boys care for one another through R&T play. The first part of this research examines the various ways in which boys participate in R&T play, how the R&T scenario is set up, who plays, what the rules are and how they are enforced. Boys were video taped while engaging in R&T play and during a game called Smear the Queer (Smear). Data gathered from observing the video taped segments of R&T play clearly suggests that R&T play is a way in which boys express care for one another, that Smear is a camouflage for intimacy, and that R&T play is more like a dance among the players than a helter-skelter mix of running, chasing, and tackling. The second part of this study involved interviewing the players



while they watched selected video segments of R&T play and expressions of care exhibited during R&T play. Analysis of the interview transcripts established that the boys were able to clearly delineate the difference between R&T play and aggression. Furthermore, the participants were able to validate the game of Smear as a way in which boys are able to express care for one another. Finally, the participants described R&T play as the vehicle in which they are able to experience physical intimacy with one another. It is concluded that R&T play is clearly misunderstood by the uninformed observer. The players are keenly aware that engagement in R&T play is a time that it is acceptable to hug, hold hands, and otherwise experience bodily contact not permitted outside the play arena. (PsycINFO Database Record (c) 2012 APA, all rights reserved)

SN - 0419-4209

AD - Reed, Thomas L.: U South Carolina, US

ER -

TY - JOUR

ID - 1201

T1 - Development of sex differences in preschool children: Social behavior during an academic year

A1 - Braza,Francisco; Braza,Paloma; Carreras,Maria Rosario; Munoz,Jose Manuel

Y1 - 1997///

N1 - Peer Reviewed Journal: 1997-07974-032

English

Journal; Peer Reviewed Journal

KW - PsycInfo

KW - Rough and Tumble

KW - Childhood Play Behavior

KW - Human Sex Differences

RP - NOT IN FILE

SP - Feb

EP - 188

JF - Psychological Reports

JA - Psychol.Rep.

VL - .80

IS - 1

N2 - Sex differences in activities of preschoolers were assessed during free play time from observation of the behavior of 31 children (23 girls, 8 boys). The differences were noted for the time girls and boys spent in the activities considered, boys spending more time in rough-and-tumble play and in agonistic activities and girls in organized games such as games with rules and role-play in addition to affiliative activities. Sex differences could be detected also in the distribution of time among various activities of the children during free-play in the 3 terms of the school year under consideration. (PsycINFO Database Record (c) 2012 APA, all rights reserved)

SN - 0033-2941

AD - Braza, Francisco: Estacion Biologica de Donana (CSIC), Sevilla, Spain

ER -

TY - JOUR

ID - 1202

T1 - Appreciating the Value of Recess and Playground Behavior: Educational Implications. [References]

A1 - Wandle,Caroline H.

Y1 - 1996///

N1 - Electronic Collection: 2004-17622-033

English

Electronic Collection

KW - PsycInfo

KW - Rough and Tumble

KW - Childhood Play Behavior

KW - Cognitive Development

KW - Psychosocial Development

KW - Playgrounds

KW - Psychologists

RP - NOT IN FILE

SP - Aug, 1996

JF - PsycCRITIQUES

VL - .41

IS - 8

N2 - Originally published in Contemporary Psychology: APA Review of Books, 1996, Vol 41(8), 806-808. The reviewer states that this book (see record 1994-98891-000) undertakes the important task of informing educators and psychologists about the crucial role of recess behavior in terms of both social and cognitive development. Unlike previous examinations, Pellegrini focuses on the child of the elementary and middle school years, thus extending our understanding beyond the more typical focus on the role of play for the preschool child. Of particular interest is his exploration of the role of play, especially rough play, for boys from elementary to early middle school. Furthermore, Pellegrini expands his study, touching briefly on the previously examined variables such as playground design and timing, to explore in more detail gender, age, and sociometric status as possible mediator variables. This work highlights the functions of recess and playground behaviors especially for boys in both cognitive and social development, providing valuable information for educators and psychologists.

(PsycINFO Database Record (c) 2012 APA, all rights reserved)

SN - 1554-0138

AD - Wandle, Caroline H.: School Psychology Program, Tufts University, Medford, MA, US

ER -

TY - JOUR

ID - 1203

T1 - Self stories: Effects of children's emotional styles on their appropriation of self-schemata

A1 - Hencke, Rebecca Whitson

Y1 - 1996///

N1 - Dissertation Abstract: 1996-95021-252

English

Dissertation Abstract

KW - PsycInfo

KW - Rough and Tumble

KW - Emotional States

KW - Personality Traits

KW - Self Concept

RP - NOT IN FILE

SP - Nov

JF - Dissertation Abstracts International: Section B: The Sciences and Engineering

VL - .57

IS - 5-B

N2 - A model for children's acquisition of self-schemata is proposed. The proposed social-constructivist model of the self emphasizes both the importance of socio-cultural institutions as carriers of culture-specific ideal and possible selves and the importance of children as active agents re-creating within themselves the canonical models of their culture. The role of emotion in shaping the form of the individual's appropriated self-schemata by is recognized as critical to the process of self-appropriation. To test this model, 30 children participating in the Harvard Infant Study were interviewed at four years and again at five years of age, using the Peer Nice and Mean Scale (Fischer, Hencke and Hand, 1991/1993). Using the numerous behavioral observations of these children throughout infancy, three emotional styles were identified: the fearful, the shy, and the sociable. Comparisons of children's understanding of the social interactions shown to them were compared according to valence (Nice or Mean), presence of a character named after the child in the story, and amount of prompting required to elicit an answer from them. Results of the study supported the hypothesis that emotional style would bias children's performance on stories with negative valences and stories with a self character. Fearful and shy children showed a reluctance to retell or answer questions about the story involving meanness by the self-named character. Results are discussed in terms of the implications for development of this resistance to recognizing one's aggressive feelings and acts. In addition to delaying the development of a self-concept which recognizes both positive and negative aspects of oneself, it is suggested that the inability to tolerate an image of oneself as mean may lead to an unwillingness to participate in rough-and-tumble peer play, creating a risk of social

isolation and/or rejection, especially for boys. Larger studies, with children of varying ethnicities, are recommended (PsycINFO Database Record (c) 2012 APA, all rights reserved)

SN - 0419-4217

AD - Hencke, Rebecca Whitson: Harvard U, US

ER -

TY - JOUR

ID - 1204

T1 - How child sexual molesters groom adults to gain access to children

A1 - Van Dam, Carla Helene

Y1 - 1996///

N1 - Dissertation Abstract: 1996-95021-134

English

Dissertation Abstract

KW - PsycInfo

KW - Rough and Tumble

KW - Child Abuse

KW - Pedophilia

KW - Sex Offenses

KW - Sexual Abuse

RP - NOT IN FILE

SP - Nov

JF - Dissertation Abstracts International: Section B: The Sciences and Engineering

VL - .57

IS - 5-B

N2 - The literature on child sexual abuse and offender characteristics was surveyed. A specific case was presented to provide a framework for exploring the community dynamics that provide inadvertent support and enthusiasm for the molester, at the expense of the child victims. The dynamics of sexual abuse and the community response were examined. Definitions of terms were provided, and information about molesters was summarized. The social climate, both in society's attitudes towards women and children, as well as society's general denial around the topic was presented. The harm of sexual abuse was described, both in terms of the moral issues, the psychological effects, and the cultural concerns. Then, conditions necessary for sexual abuse to occur were covered, including the need for the molester to have a sexual interest in children, overcome resistance, groom the adults, and groom the child. Current prevention strategies and the limitations of those strategies were also summarized. Twenty-one men in treatment following child sexual molestation convictions were interviewed about the strategies they used to manage the adults in their environment, both to gain access to children and to maintain security. This "grooming" of the adults in the community appeared to occur and consistently included a number of behaviors. Participants described themselves as charming, nice, and likeable. Their helpfulness was exemplified by how they anticipated adults' needs, providing timely and appreciated assistance, while never seeming to accept assistance in return. All twenty-one molesters also engaged in behaviors described in the literature as part of the grooming of children. With younger children this involved tickling, roughhousing, and playing with them on their level. With adolescents it involved such sensual touching as caressing hair, and talking to them on their level. Both the tickling, roughhousing, and peer-like quality of the play, as well as the sensual touching and pee (PsycINFO Database Record (c) 2012 APA, all rights reserved)

SN - 0419-4217

AD - Van Dam, Carla Helene: The Union Inst, US

ER -

TY - JOUR

ID - 1205

T1 - A comparison of 8- and 11-year-old girls' and boys' participation in specific types of rough-and-tumble play and aggressive fighting: Implications for functional hypotheses

A1 - Boulton, Michael J.

Y1 - 1996///

N1 - Peer Reviewed Journal: 1996-05627-003

English

Journal; Peer Reviewed Journal

KW - PsycInfo

KW - Rough and Tumble

KW - Age Differences

KW - Aggressive Behavior

KW - Childhood Play Behavior

KW - Dominance

RP - NOT IN FILE

SP - 1996, pp

EP - 1996,287

JF - Aggressive Behavior

JA - Aggress.Behav

VL - .22

IS - 4

N2 - Investigated the role of rough play as practice for the development of real fighting skills and as a safe way to establish/display social dominance with 86 8- and 11-yr-olds. Boys engaged in more chase initiation activities, more bouts of brief rough-and-tumble play, more bouts of restraining and more bouts of hitting than girls. Data suggest rough play develops fighting skills and establishes dominance, although sex differences were not found for all types of rough play observed. No age differences were obtained. In all but one case, there were no differences in the extent to which 8/9- and 10/11-yr-old girls and boys employed wrestling, hitting and restraining, supporting the view that the practice fighting hypothesis is relevant throughout the 8-11-yr-old period. (PsycINFO Database Record (c) 2012 APA, all rights reserved)

SN - 0096-140X

AD - Boulton, Michael J.: Keele U, Psychology Dept, Keele, England

ER -

TY - JOUR

ID - 1206

T1 - Mother-infant, father-infant interaction and involvement in childcare and household labor among Taiwanese families

A1 - Sun,Li-Ching; Roopnarine,Jaipaul

Y1 - 1996///

N1 - Peer Reviewed Journal: 1996-01751-012

English

Journal; Peer Reviewed Journal

KW - PsycInfo

KW - Rough and Tumble

KW - Childrearing Practices

KW - Father Child Relations

KW - Household Management

KW - Mother Child Relations

KW - Human Sex Differences

KW - Parental Role

KW - Parents

KW - Sex Roles

RP - NOT IN FILE

SP - Jan

EP - Mar

JF - Infant Behavior & Development

JA - Infant behav

VL - .19

IS - 1

N2 - Mother-infant and father-infant interactions were observed in 25 Taiwanese homes, and parents provided estimates of their involvement in caregiving and household activities. Observations indicated that mothers held

infants more than did fathers and were more likely to feed, smile at, vocalize to, and engage in object play with them than were fathers. Fathers engaged in more rough play than did mothers. There were no sex-of-parent differences in soothing infants or displaying affection to them. Mothers and fathers treated males and females similarly. Infants smiled at, vocalized to, approached, and were more distressed in the presence of mothers than fathers. Data reveal sex-differentiated patterns of involvement in child care and household activities. Results are hypothesized to reflect Taiwanese societal rigidity in sex roles and filial piety. (PsycINFO Database Record (c) 2012 APA, all rights reserved)

SN - 0163-6383

AD - Sun, Li-Ching: Syracuse U, Syracuse, NY, US

ER -

TY - JOUR

ID - 1207

T1 - An indicator of pupil's movement satisfaction in the basic stage of education. [Arabic]

A1 - Ibraheem, Hashim

Y1 - 1995///

N1 - Peer-Reviewed Status-Unknown: 1997-86932-001

Arabic

Journal; Peer-Reviewed Status-Unknown

KW - PsycInfo

KW - Rough and Tumble

KW - Age Differences

KW - Motor Processes

KW - Satisfaction

KW - Elementary School Students

KW - Junior High School Students

RP - NOT IN FILE

SP - Feb

EP - 372

JF - Dirasat

VL - .22A

IS - 1

N2 - Movement is considered a fundamental way to express thoughts, concepts, feelings and self-concept in general. Therefore, the positive emotional condition that results from success is considered to be one of the major foundations of one's development. The purpose of this study was to determine the level of movement satisfaction for students in fourth, fifth and sixth grades, and to find differences among these grades in movement satisfaction. The descriptive approach was utilized with a random sample of 1,110 pupils, employing Tanner's Movement Satisfaction Scale, as adapted to the Arabic language. It was found that the level of movement satisfaction ranged between 80% and 86% for items such as dribbling, high jumping and kicking a ball; 70-79% for climbing, high-speed running and hanging; and 49-67% for lifting heavy objects, sudden stops while moving, rough play and balancing on one foot. More detailed results were presented and discussed, and their implications were presented. (PsycINFO Database Record (c) 2012 APA, all rights reserved)

SN - 0255-8033

AD - Ibraheem, Hashim: College of Physical Education, U of Jordan, Jordan

ER -

TY - JOUR

ID - 1208

T1 - War toy play and aggression in kindergartners. [Dutch]

A1 - Hellendoorn, J.

Y1 - 1995///

N1 - Peer Reviewed Journal: 1997-85166-001

Dutch

Journal; Peer Reviewed Journal

KW - PsycInfo

KW - Rough and Tumble

KW - Aggressive Behavior

KW - Childhood Play Behavior

KW - Parental Attitudes

KW - Teacher Attitudes

KW - Toy Selection

KW - Family Background

KW - Parents

KW - Teachers

RP - NOT IN FILE

SP - Nov

EP - 243

JF - Kind en Adolescent

VL - .16

IS - 4

N2 - Studied the relationship between war toy play and aggression in kindergartners, with consideration of the influence of family background, the attitudes of parents and teachers towards war toys, and the play situation.

Human Ss: 168 normal male and female Dutch preschool and school-age children (aged 4-7 yrs) (kindergartners). Normal male Dutch adults (mean age 34 yrs) (children's fathers). Normal female Dutch adults (mean age 32 yrs) (children's mothers). Normal Dutch adults (children's teachers). The parents were administered a questionnaire on their family background and their attitudes towards war toys, and the teachers were interviewed about their attitudes towards war toys. The parents and teachers rated the children's aggressiveness with the Child Behavior Checklist. The children were observed in small-group play sessions in the presence of a standard set of toys, including various war toys. Four types of aggression were distinguished: real aggression, playful quasiaggression, fantasy aggression, and rough-and-tumble aggression. (English abstract) (PsycINFO Database Record (c) 2012 APA, all rights reserved)

SN - 0167-2436

AD - Hellendoorn, J.: Rijksuniversiteit Leiden, Vakgroep Orthopedagogiek, Netherlands

ER -

TY - JOUR

ID - 1209

T1 - Sissiness, tomboyism, sex-role, sex identity and orientation

A1 - McConaghy, Nathaniel

Y1 - 1995///

N1 - Peer Reviewed Journal: 1996-30406-001

English

Journal; Peer Reviewed Journal

KW - PsycInfo

KW - Rough and Tumble

KW - Gender Identity

KW - Heterosexuality

KW - Homosexuality

KW - Sex Roles

KW - Stereotyped Attitudes

KW - Femininity

KW - Masculinity

RP - NOT IN FILE

SP - Jun

EP - 283

JF - Australian and New Zealand Journal of Psychiatry

VL - .29

IS - 2

N2 - Investigated the relationship between homosexuality/heterosexuality, masculinity and femininity, and sex linked behaviors and degree of sexual identity in 66 males (mean age 19.5 yrs) and 51 females (mean age 19.8 yrs). Ss completed the Bem Sex-Role Inventory and the Sex-Linked Behaviors Questionnaire. Results show that 20% of the male and 28% of the female Ss reported current awareness of some degree of homosexual feeling.

The opposite sex linked "sissy" and "tomboyish" behaviors of male Ss correlated significantly with their reported ratio of homosexual to heterosexual feelings. High masculine scores in female Ss correlated strongly with several "tomboyish" behaviors. Masculine scores of male Ss showed a weaker association with liking of rough and tumble and contact sport than did those of female Ss. Feminine scores of female Ss showed the weakest relationships with the sex linked behaviors. (PsycINFO Database Record (c) 2012 APA, all rights reserved)

SN - 0004-8674

AD - McConaghy, Nathaniel: Prince of Wales Hosp, Dept of Psychiatry, Randwick, NSW, Australia

ER -

TY - JOUR

ID - 1210

T1 - The promotion and marketing of toys: Time to rethink the paradox?

A1 - Kline,Stephen

Y1 - 1995///

N1 - Book: 1995-98339-008

English

Book; Edited Book

KW - PsycInfo

KW - Rough and Tumble

KW - Childhood Play Behavior

KW - Imagination

KW - Toys

KW - Age Differences

KW - Human Sex Differences

KW - Television Advertising

RP - NOT IN FILE

SP - 306

JF - Pellegrini, Anthony D [Ed]

IS - 1995

N2 - (from the introduction) examines the role of toys and television advertising for toys on children's fantasy play / embeds [the] discussion of toys in the larger play literature, particularly that work studying symbolic play and rough-and-tumble play / reports interesting [sex and] age-differences for the influence of television on play (from the chapter) the psychological promotion of play / rethinking the play ethos / critiques of "free" toy play / the promotion of toys in America (PsycINFO Database Record (c) 2012 APA, all rights reserved)

ER -

TY - JOUR

ID - 1211

T1 - Boys' rough-and-tumble play and social competence: Contemporaneous and longitudinal relations

A1 - Pellegrini,Anthony D.

Y1 - 1995///

N1 - Book: 1995-98339-005

English

Book; Edited Book

KW - PsycInfo

KW - Rough and Tumble

KW - Aggressive Behavior

KW - Childhood Play Behavior

KW - Social Skills

KW - Activity Level

KW - Adaptability (Personality)

KW - Affiliation Motivation

KW - Cooperation

KW - Human Males

KW - Peer Relations

KW - Problem Solving

KW - Social Interaction

RP - NOT IN FILE

SP - 306

JF - Pellegrini, Anthony D [Ed]

IS - 1995

N2 - (from the chapter) in the 2 studies reported here, an attempt was made to identify aspects of R & T [rough-and-tumble play] which may serve a social-competence function in childhood / [study 1 examines] the relation between the flexibility dimension of R & T and flexibility in social problem-solving / determine the relation between 2 aspects of temperament-activity level and flexibility-and aspects of R & T / compare the social composition of boys' R & T groups with group composition during other forms of social interaction / [present] relations between specific dimensions of R & T and aspects of social competence / [Ss were 37 5th grade males] [study 2 examines] the social affiliative function served by R & T in a longitudinal context / the dimensions of affiliation examined included: engagement in cooperative games-with-rules, peer nominated popularity, and peer nominated dominance / 72 males [enrolled in grades K-5] participated in Study 2 (PsycINFO Database Record (c) 2012 APA, all rights reserved)

ER -

TY - JOUR

ID - 1212

T1 - The future of play theory: A multidisciplinary inquiry into the contributions of Brian Sutton-Smith

A1 - Pellegrini,Anthony D.

Y1 - 1995///

N1 - Book: 1995-98339-000

English

Book; Edited Book

(Created by PsycINFO) Introduction [by] Anthony D. Pellegrini Part I: Play as progress \* Play, ethology, and education: A personal account / Peter K. Smith / 3-21 \* Animal play, games of angels, biology, and Brian / Robert Fagen / 23-44 \* Children's play and adult leisure / Garry Chick and Lynn A. Barnett / 45-69 Part II: Play as power \* Competitive play on the plains: An analysis of games and warfare among native American warrior societies, 1800-1850 / John W. Loy and Graham L. Hesketh / 73-105 \* Boys' rough-and-tumble play and social competence: Contemporaneous and longitudinal relations / Anthony D. Pellegrini / 107-126 \* Aggressive toy play / Jeffrey Goldstein / 127-147 Part III: Play as fantasy \* Toys and stories / Greta G. Fein / 151-164 \* The promotion and marketing of toys: Time to rethink the paradox? / Stephen Kline / 165-185 \* Imaginative play in childhood: Precursor of subjunctive thoughts, daydreaming, and adult pretending games / Jerome L. Singer / 187-219 \* Social pretend with mother and sibling: Individual differences and social understanding / Lisa M. Youngblade and Judy Dunn / 221-239 Part IV: Play as self \* Representing children's play: Anthropologists at work / Helen B. Schwartzman / 243-255 \* Past play: Relics, memory, and history / Bernard Mergen / 257-274 Conclusion: The persuasive rhetorics of play [by] Brian Sutton-Smith Appendix: A list of Brian Sutton-Smith's play-related publications [by] F. F. McMahon

KW - PsycInfo

KW - Rough and Tumble

KW - Childhood Play Behavior

KW - Childhood Play Development

KW - Theories

RP - NOT IN FILE

SP - 306

JF - (1995)

VL - The future of play theory

N2 - (from the cover) This . . . book looks at the current status of play theory across the disciplines, literally from anthropology to zoology. The authors examine play phenomena from 4 perspectives [as studied by B. Sutton-Smith], play as progress; play as power; play as fantasy; and play as self. This book will serve as [a] reference tool, textbook, and source of inspiration for all those interested in the fascinating study of children's play. (PsycINFO Database Record (c) 2012 APA, all rights reserved)

AD - Pellegrini, Anthony D.: U Georgia, Athens, GA, US

ER -



TY - JOUR

ID - 1213

T1 - The new father: A study of attachment to primary caregiving fathers

A1 - Geiger,Brenda

Y1 - 1995///

N1 - Dissertation Abstract: 1995-95017-212

English

Dissertation Abstract

KW - PsycInfo

KW - Rough and Tumble

KW - Caregivers

KW - Father Child Relations

KW - Human Sex Differences

KW - Parent Child Relations

KW - Parental Role

RP - NOT IN FILE

SP - Sep

JF - Dissertation Abstracts International: Section B: The Sciences and Engineering

VL - .56

IS - 3-B

N2 - This research analyzes the unique and interactive effects of the gender of the caregiver and the primacy of the caregiver role on caregivers' and infants' behaviors. In 14 of the families included in this study, fathers had been the primary caregivers since their infants were at most 7 months old while mothers were employed full time. In 14 other families, fathers were employed full time while mothers were their infants' primary caregivers. All infants were less than 21 months of age, healthy, and mobile. Home videotaped observations were conducted on two separate occasions with each family. Each observation included three episodes. In episodes 1 and 2 parents took turns interacting alone with the infant in a nonstressful situation. In episode 3, infants were observed for 5 minutes while under stress in a modified version of the Strange Situation. A (gender of the caregiver) x (primacy of the caregiver role) analysis of variance was performed on all infants' and parents' attachment and affiliative behaviors coded under stressful and nonstressful conditions. No difference based on the caregiver gender or role was observed on any caregivers' affiliative behavior except for rough and tumble play for which a main gender effect was found. Primary caregiving fathers were found to engage in as much caregiving behavior as primary and secondary caregiving mothers, and to be the most affectionate caregivers. No caregiver gender or role effects were observed on most infants' affiliative behaviors in nonstressful conditions. The exception concerns the measure of synchrony. Infants' play interaction was found to be most synchronous with primary caregiving fathers. A main caregiver role effect was observed on the attachment behavior of infant's display of affection. A caregiver gender x role interaction effect was found on other measures of attachment--clinging, moving away and exploring. Under stress and when they had the choice between their parents, infants showed by (PsycINFO Database Record (c) 2012 APA, all rights reserved)

SN - 0419-4217

AD - Geiger, Brenda: State U New York at Albany, US

ER -

TY - JOUR

ID - 1215

T1 - A longitudinal study of boys' rough-and-tumble play and dominance during early adolescence

A1 - Pellegrini,Anthony D.

Y1 - 1995///

N1 - Peer Reviewed Journal: 1995-36435-001

English

Journal; Peer Reviewed Journal

KW - PsycInfo

KW - Rough and Tumble

KW - Adolescent Development

KW - Childhood Play Development

KW - Dominance

KW - Human Males

KW - Longitudinal Studies

RP - NOT IN FILE

SP - Jan

EP - Mar

JF - Journal of Applied Developmental Psychology

VL - .16

IS - 1

N2 - Longitudinally examined the extent to which 2 forms of rough-and-tumble play (R&T/Rough and R&T/Chase) varied across early adolescence and explored the role of each form of R&T in 82 12-13 yr old boys' dominance relations. Ss were observed at least 10 times per year for each of 2 yrs. The 2 forms of R&T were statistically independent of each other. R&T/Chase did not vary from Year 1 to Year 2 and was not related to dominance, but R&T/Rough declined across time and was related to dominance displays and aggression displays. (PsycINFO Database Record (c) 2012 APA, all rights reserved)

SN - 0193-3973

AD - Pellegrini, Anthony D.: U Georgia, Inst for Behavioral Research, Athens, US

ER -

TY - JOUR

ID - 1216

T1 - Gender identity disorder in boys: The interface of constitution and early experience

A1 - Coates,Susan W.

Y1 - 1995///

N1 - Peer Reviewed Journal: 1995-29278-001

English

Journal; Peer Reviewed Journal

KW - PsycInfo

KW - Rough and Tumble

KW - Early Experience

KW - Etiology

KW - Gender Identity

KW - Human Males

KW - Personality

KW - Disorders

RP - NOT IN FILE

SP - 1995, pp

EP - 38

JF - Psychoanalytic Inquiry

VL - .15

IS - 1

N2 - Clarifies the role of constitutional (CST) factors in the etiology of childhood gender identity disorder (GID). Clinical research into gender is reviewed, as well as the effect that prenatal hormones may have on gender role behavior. The work of S. J. Bradley (1985) suggests that children with GID have an inherited predisposition for affective disorder, manifested in early childhood in a proneness to anxiety states. GID boys are often averse to rough-and-tumble play, resembling other shy, inhibited boys who typically construct gender identities that are unconflicted. Thus the CST predisposition that lowers the threshold for a gender identity disturbance in boys may not be directly sex-linked, suggesting that the CST factor becomes associated with a disturbance in gender through an indirect route, specifically by causing the child to be especially vulnerable to disruptions in his primary attachment relationships. (PsycINFO Database Record (c) 2012 APA, all rights reserved)

SN - 0735-1690

AD - Coates, Susan W.: St Luke's/Roosevelt Hosp, Dept of Psychiatry, Childhood Gender Identity Ctr, New York, NY, US

ER -

TY - JOUR

ID - 1217

T1 - School recess and playground behavior: Educational and developmental roles

A1 - Pellegrini,Anthony D.

Y1 - 1995///

N1 - Book: 1994-98891-000

English

Book; Authored Book

(Created by PsycINFO) Acknowledgments Children on the playground at recess: What's so important?

Playgrounds and children's behavior at recess Theory and method Dimensions of the playground and children's

behavior: Implications for social cognition development The effects of recess timing on elementary school

children's recess and classroom behavior Longitudinal relations between playground behavior and cognition:

Explorations in social dimensions of cognition The rough-and-tumble play of primary school children:

Contemporaneous and longitudinal relations Preference for outdoor play during early adolescence Longitudinal

relations between social networks and adjustment to middle school Adolescent boys' rough-and-tumble play

Conclusions and implications Index

KW - PsycInfo

KW - Rough and Tumble

KW - Childhood Development

KW - Childhood Play Behavior

KW - Playgrounds

KW - Cognitive Development

KW - Middle School Students

KW - Peer Relations

KW - Primary School Students

KW - Psychosocial Development

KW - School Environment

KW - Social Cognition

RP - NOT IN FILE

SP - 186

JF - (1995)

VL - School recess and playground behavior

N2 - (from the cover) The recess period represents a unique part of the school day. It is one of the few times when children can interact with their peers on their own terms with minimal adult intervention. Consequently, it represents one of the few places in primary and middle schools to observe spontaneous peer interaction. "School Recess and Playground Behavior" offers a programmatic examination of a neglected aspect of children's behavior and informs related literatures such as the educational, social-developmental, and cognitive-developmental literatures. (PsycINFO Database Record (c) 2012 APA, all rights reserved)

AD - Pellegrini, Anthony D.: U Georgia, Athens, GA, US

ER -

TY - JOUR

ID - 1218

T1 - The rough play of adolescent boys of differing sociometric status

A1 - Pellegrini,Anthony D.

Y1 - 1994///

N1 - Peer Reviewed Journal: 1995-09100-001

English

Journal; Peer Reviewed Journal

KW - PsycInfo

KW - Rough and Tumble

KW - Aggressive Behavior

KW - Childhood Play Behavior

KW - Dominance Hierarchy

KW - Sociometry

KW - Popularity

KW - Social Acceptance

RP - NOT IN FILE

SP - Sep

EP - 540

JF - International Journal of Behavioral Development

VL - .17

IS - 3

N2 - Chase and rough play (RP), 2 forms of rough-and-tumble play, were observed in 22 popular, 19 average, and 13 reject White adolescent boys (mean age for all groups 13 yrs) while they were on the playground during their school recess period. Sociometrically defined average and rejected Ss spent a significant portion of their time in RP when compared with popular Ss. RP was related to aggression and perspective-taking status for rejected Ss and was related to dominance status for all Ss. Rejected and average Ss chose to engage in RP with less dominant children. (PsycINFO Database Record (c) 2012 APA, all rights reserved)

SN - 0165-0254

AD - Pellegrini, Anthony D.: U Georgia, Inst for Behavioral Research, Athens, US

ER -

TY - JOUR

ID - 1220

T1 - Sex differences in toy play and use of video games

A1 - Goldstein, Jeffrey H.

Y1 - 1994///

N1 - Book: 1994-98307-006

English

Book; Edited Book

KW - PsycInfo

KW - Rough and Tumble

KW - Childhood Play Behavior

KW - Human Sex Differences

KW - Toys

KW - Computer Games

KW - Preferences

KW - Social Influences

RP - NOT IN FILE

SP - lay, and

EP - 129

JF - Goldstein, Jeffrey H [Ed]

IS - 1994

N2 - (from the introduction) differences in the play of boys and girls, and their different toy preferences, are discussed / biological and social origins of sex differences in play are considered, with a focus on aggressive play, war toys, and video games / [Ss in studies discussed were 4-16 yr olds] (from the chapter) children and adults view play differently / the role of prior experience / rough and tumble play / toy preference / social effects: isolation and sociability / school performance / cognitive effects / personality and psychopathology / aggression and video games (PsycINFO Database Record (c) 2012 APA, all rights reserved)

AD - Goldstein, Jeffrey H.: Utrecht U, Dept of Social & Organizational Psychology, Utrecht, Netherlands

ER -

TY - JOUR

ID - 1222

T1 - Boys' rough-and-tumble play, social competence and group composition

A1 - Pellegrini, A.

Y1 - 1993///

N1 - Peer Reviewed Journal: 1994-07550-001

English

Journal; Peer Reviewed Journal

KW - PsycInfo

KW - Rough and Tumble

KW - Childhood Play Behavior

KW - Peer Relations

KW - Personality

KW - Popularity

KW - Elementary School Students

KW - Problem Solving

KW - Social Interaction

RP - NOT IN FILE

SP - Sep

EP - 248

JF - British Journal of Developmental Psychology

VL - .11

IS - 3

N2 - Examined relations between aspects of 42 male 5th graders' rough-and-tumble play (RTP) and social competence. Ss were observed on the school playground for 20 wks and were asked to nominate peers whom they liked most and least, rank-order peers in terms of dominance, and solve hypothetical social problems. Teachers completed a temperament questionnaire for each S. Neither relative frequency of RTP nor the vigor dimension of RTP accounted for significant variance in Ss' popularity beyond other forms of reciprocal social interactions. Further, relative frequency of RTP was negatively, but not significantly, related to popularity. The flexibility dimension of RTP did account for significant variance in social problem solving. Both aspects (i.e., activity and flexibility) of temperament measured correlated significantly with the vigor level of RTP. (PsycINFO Database Record (c) 2012 APA, all rights reserved)

SN - 0261-510X

AD - Pellegrini, A. D.: U Georgia, Inst for Behavioral Research, Athens, US

ER -

TY - JOUR

ID - 1223

T1 - Gentle play partners: Mother-child and father-child play in New Delhi, India

A1 - Roopnarine, Jaipaul L.

Y1 - 1993///

N1 - Book: 1993-98052-011

English

Book; Edited Book

KW - PsycInfo

KW - Rough and Tumble

KW - Childhood Play Behavior

KW - Parent Child Relations

KW - Attachment Behavior

KW - Games

RP - NOT IN FILE

SP - 389

JF - MacDonald, Kevin [Ed]

IS - 1993

N2 - (from the chapter) hope to shed some light on adult-infant play in a society with a very lengthy history / while the major focus . . . is on early patterns of play between parents and infants in New Delhi, India, [the authors] provide some preliminary information on infant games, and play and infant stimulation / discuss the importance of rough play in the development of attachment to fathers (PsycINFO Database Record (c) 2012 APA, all rights reserved)

AD - Roopnarine, Jaipaul L.: Syracuse U, Coll of Human Development, Dept of Child & Family Studies, Syracuse, NY, US

ER -

TY - JOUR

ID - 1224

T1 - Parent-child play: Descriptions and implications

A1 - MacDonald, Kevin

Y1 - 1993///

N1 - Book: 1993-98052-000

English

Book; Edited Book

(Created by PsycINFO) Introduction: Parents and children playing [by] Kevin MacDonald \* Dilemmas in adult play with children / Brian Sutton-Smith / 15-40 Part I. Theoretical perspectives \* Parent-infant games as dynamic social systems / Alan Fogel, Evangeline Nwokah and Jeanne Karns / 43-70 \* Parent-infant play as a window on infant competence: An organizational approach to assessment / Marjorie Beeghley / 71-112 \* Parent-child play: An evolutionary perspective / Kevin MacDonald / 113-143 Part II. Mechanisms of parent-child play \* Rough and tumble play: A fundamental brain process / Jaak Panksepp / 147-184 \* Lessons from primate play / Maxine Biben and Steven J. Suomi / 185-196 \* Parent-child physical play: Determinants and consequences / James Carson, Virginia Burks and Ross D. Parke / 197-220 \* The necessary lightness of mother-child play / Phyllis Levenstein and John O'Hara / 221-237 \* Mother-infant play and maternal depression / Jeffrey F. Cohn / 239-256 Part III. Cross-cultural perspectives \* Peekaboo across cultures: How mothers and infants play with voices, faces, and expectations / Anne Fernald and Daniela K. O'Neill / 259-285 \* Gentle play partners: Mother-child and father-child play in New Delhi, India / Jaipaul L. Roopnarine, Frank H. Hooper, Mohammad Ahmeduzzaman and Brad Pollack / 287-304 \* "Mother, older sibling and me": The overlapping roles of caregivers and companions in the social world of two- to three-year-olds in Ngeca, Kenya / Carolyn Pope Edwards and Beatrice B. Whiting / 305-329 \* Persistence of play and feeding interaction differences in three Miami cultures / Tiffany M. Field / 331-347 \* Cultural differences in scaffolding pretend play: A comparison of American and Mexican mother-child and sibling-child pairs / Jo Ann M. Farver / 349-366 \* The cultural context of mother-infant play in the newborn period / J. Kevin Nugent, Sheila Greene, Dorit Wiecezorek-Deering, Kathleen Mazor, John Hendler and Cynthia Bombardier / 367-386 Contributors Index

KW - PsycInfo

KW - Rough and Tumble

KW - Childhood Play Behavior

KW - Parent Child Relations

KW - Cross Cultural Differences

KW - Disorders

KW - Mental Disorders

RP - NOT IN FILE

SP - 389

JF - (1993)

VL - Parent-child play

N2 - (from the cover) This book provides the latest research and theory in the area of children's play with their parents. It includes discussions of the basic processes involved in parent-child play, parent-child play in atypical populations of children, and parent-child play in cross-cultural perspective. An opening section on basic processes provides a general background on the mechanisms involved in play and provides a foundation for the rest of the book. The section on atypical populations focuses on parent-child play among clinical populations, including Down syndrome children, premature children, hyperactive children, and economically-distressed families and families with depressed parents. It expands the context of the populations' data described in the first section and provides some additional insight into mechanisms. Finally, the book describes some of the enormous cross-cultural variations in play behavior. (PsycINFO Database Record (c) 2012 APA, all rights reserved)

AD - MacDonald, Kevin: California State U, Dept of Psychology, Associate Professor, Long Beach, CA, US

ER -

TY - JOUR

ID - 1225

T1 - Early play arousal, sex-typed play, and activity level as precursors to later rough-and-tumble play

A1 - McBride-Chang, Catherine; Jacklin, Carol

Y1 - 1993///

N1 - Peer Reviewed Journal: 1993-37143-001

English

Journal; Peer Reviewed Journal

KW - PsycInfo

KW - Rough and Tumble

KW - Activity Level

KW - Childhood Play Development

KW - Measurement

KW - Sex Roles

KW - Longitudinal Studies

RP - NOT IN FILE

SP - Apr

EP - 108

JF - Early Education and Development

VL - .4

IS - 2

N2 - Compared 2 ways of measuring rough-and-tumble play (RTP) and examined 3 precursors to this play. Early parental socializing influences (particularly from fathers), "boy" sex-typed play preferences, and activity level were hypothesized to be associated with later RTP. Objective measures of RTP at nursery school were moderately correlated with ratings of such play by parents and teachers at 1st grade. Arousal during play at 45 mo and extent of RTP at 18 mo by fathers, but not mothers, were correlated significantly with ratings of RTP at 1st grade. "Boy" sex-typed play was also significantly associated with 1st-grade RTP. These correlations were similar for both boys and girls. There were no correlates with nursery school RTP that were similar for both sexes. Activity levels were not consistently associated with later RTP behaviors. (PsycINFO Database Record (c) 2012 APA, all rights reserved)

SN - 1040-9289

AD - McBride-Chang, Catherine: U Southern California, US

ER -

TY - JOUR

ID - 1226

T1 - Commentary: At play in the public arena

A1 - Sutton-Smith, Brian

Y1 - 1992///

N1 - Peer Reviewed Journal: 2000-05448-008

English

Journal; Peer Reviewed Journal

KW - PsycInfo

KW - Rough and Tumble

KW - Childhood Play Behavior

RP - NOT IN FILE

SP - Oct

EP - 400

JF - Early Education and Development

VL - .3

IS - 4

N2 - Comments on the articles by C. H. Hart et al, A. D. Pelligrini, J. Roopnarine et al, M. J. Boulton, K. MacDonald, A. Costabile et al, and M. W. Watson and Y. Peng (see records 2000-05448-001, 2000-05448-002, 2000-05448-003, 2000-05448-004, 2000-05448-005, 2000-05448-006, 2000-05448-007, respectively) which explored issues of children's play. The present author contends that though valuable for their uniqueness, these papers are unfortunately largely devoid of historical consciousness. It is argued that the practical focus of these papers is upon the desirability of constraints upon play as a form of violence, whether manifest in play with toy guns, make-believe war themes, hyperactive recess behavior, or specific rough-and-tumble play. (PsycINFO Database Record (c) 2012 APA, all rights reserved)

SN - 1040-9289

AD - Sutton-Smith, Brian: U Pennsylvania, Graduate School of Education, Philadelphia, PA, US

ER -

TY - JOUR

ID - 1227

T1 - The relation between toy gun play and children's aggressive behavior

A1 - Watson, Malcolm W.

Y1 - 1992///

N1 - Peer Reviewed Journal: 2000-05448-007

English

Journal; Peer Reviewed Journal

KW - PsycInfo

KW - Rough and Tumble

KW - Aggressive Behavior

KW - Childhood Play Behavior

KW - Toys

KW - Weapons

RP - NOT IN FILE

SP - Oct

EP - 389

JF - Early Education and Development

VL - .3

IS - 4

N2 - To assess the relation between toy gun play and aggression, 36 3-5-yr olds were observed in free play in their daycare center and coded for amount of real aggression, pretend aggression, rough-and-tumble play, and nonaggressive pretend play. Based on a questionnaire completed by the parents, the children were also coded for the amount they played with toy guns in the home, the rated aggressive level of their preferred television programs, the rated aggressive level of their most preferred toys, and amount of parents' physical punishment of the children. Of all children, 56% played with toy guns in the home, most of whom were boys. Multiple regression analyses indicated that amount of parents' punishment strongly predicted real aggression, and amount of toy gun play strongly predicted real aggression in boys. However, when it came to pretend aggression, aggressive level of children's preferred toys was the strongest predictor, while toy gun play negatively predicted pretend aggression. Toy gun play did not predict nonaggressive pretend play, but parents' punishment negatively predicted nonaggressive pretend play. These results indicate that toy gun play and parental punishment are positively associated with a higher level of real aggression but not pretend aggression. (PsycINFO Database Record (c) 2012 APA, all rights reserved)

SN - 1040-9289

AD - Watson, Malcolm W.: Brandeis U, Dept of Psychology, Waltham, MA, US

ER -

TY - JOUR

ID - 1228

T1 - Attitudes of parents toward war play in young children

A1 - Costabile, Angela; Genta, Maria Luisa; Zucchini, Elisabetta; Smith, Peter

Y1 - 1992///

N1 - Peer Reviewed Journal: 2000-05448-006

English

Journal; Peer Reviewed Journal

KW - PsycInfo

KW - Rough and Tumble

KW - Childhood Play Behavior

KW - Cross Cultural Differences

KW - Parental Attitudes

KW - War

RP - NOT IN FILE

SP - Oct

EP - 369



JF - Early Education and Development

VL - .3

IS - 4

N2 - A questionnaire on attitudes toward war play was given to 316 Italian parents and 84 English parents of children aged 2-6 yrs. In both cultures, boys were significantly more likely to engage in war play, either social or solitary-most commonly weapon play, but also play with combat figures and acting out a combat role. Parental attitudes, television, and peers (including older siblings), appeared as common sources of influence. Parents expressed a range of views about how to respond to war play, varying from discouraging it (more common if their children did not engage in war play), to allowing it with limits, to allowing it unconditionally. There was more of a consensus that war toys should not be allowed in school and that playgroup supervisors and teachers should try to turn war play toward more constructive ends. Analysis of a range of attitudinal scales confirmed a general dimension of restrictiveness-permissiveness with regard to war play activities, linked to attitudes about rough-and-tumble play and pretend play in the Italian sample but not in the English sample.

(PsycINFO Database Record (c) 2012 APA, all rights reserved)

SN - 1040-9289

AD - Costabile, Angela: U Calabria, Italy

ER -

TY - JOUR

ID - 1229

T1 - A time and a place for everything: A discrete systems perspective on the role of children's rough-and-tumble play in educational settings

A1 - MacDonald, Kevin

Y1 - 1992///

N1 - Peer Reviewed Journal: 2000-05448-005

English

Journal; Peer Reviewed Journal

KW - PsycInfo

KW - Rough and Tumble

KW - Childhood Development

KW - Childhood Play Behavior

KW - School Environment

RP - NOT IN FILE

SP - Oct

EP - 355

JF - Early Education and Development

VL - .3

IS - 4

N2 - Emphasizes the following points regarding the appropriate role of rough-and-tumble play (R & T) in educational settings. (1) There has been an important secular trend toward an increasing importance of adult supervision of children's play. As a result, children's R & T must be considered in the context of social values regarding the expected developmental significance of children's play. (2) R & T is an aspect of evolved systems that propel the children into enthusiastic interaction with their environment and can be reasonably supposed to have several beneficial influences on children's cognitive and social development. (3) R & T can be distinguished from aggression, and adult supervised R & T is potentially an important arena for learning the limits of appropriate R & T. (4) It is suggested that supervised educational settings should be concerned with socializing several discrete systems that underlie children's development, including the present emphasis on socializing children to be able to focus attention, inhibit behavior, and be neat and orderly. However, the purpose of the present paper is to present a case for socializing the systems underlying stimulus seeking, extroversion, sociability, and intellectual creativity as well. (PsycINFO Database Record (c) 2012 APA, all rights reserved)

SN - 1040-9289

AD - MacDonald, Kevin: California State U, Dept of Psychology, Long Beach, CA, US

ER -

TY - JOUR

ID - 1230

T1 - Rough physical play in adolescents: Does it serve a dominance function?

A1 - Boulton, Michael J.

Y1 - 1992///

N1 - Peer Reviewed Journal: 2000-05448-004

English

Journal; Peer Reviewed Journal

KW - PsycInfo

KW - Rough and Tumble

KW - Adolescent Attitudes

KW - Aggressive Behavior

KW - Childhood Play Behavior

KW - Dominance Hierarchy

RP - NOT IN FILE

SP - Oct

EP - 333

JF - Early Education and Development

VL - .3

IS - 4

N2 - In Exp 1, a questionnaire was designed to investigate secondary school pupils' participation in, and perceptions of, playful and aggressive fighting. It was administered to a sample of 13-16 yr old male and female pupils who attended 5 different schools. The majority of pupils (and significantly more males than females) reported that they did engage in playful fighting. Most pupils also indicated that it was possible to tell whether other students were engaged in playful as opposed to aggressive fighting, attesting to the view that playful and aggressive fighting should be seen as separate categories of behavior. Other results converged to indicate that, unlike during the childhood years, playful fighting may be used by some individuals (especially males) to establish and display dominance positions. The responses of some pupils also suggested that prowess in aggressive fighting was valued, in many cases because it deterred other pupils from directing unwanted behaviors at them. In Exp 2, more detailed individual interviews with 5 males and 5 females were carried out. These were used to illustrate some of the issues surrounding adolescents' participation in, and perceptions of, playful and aggressive fighting. (PsycINFO Database Record (c) 2012 APA, all rights reserved)

SN - 1040-9289

AD - Boulton, Michael J.: Sheffield City Polytechnic, Sheffield, England

ER -

TY - JOUR

ID - 1231

T1 - Parent-infant rough play: Its cultural specificity

A1 - Roopnarine, Jaipaul L.

Y1 - 1992///

N1 - Peer Reviewed Journal: 2000-05448-003

English

Journal; Peer Reviewed Journal

KW - PsycInfo

KW - Rough and Tumble

KW - Childhood Play Behavior

KW - Cross Cultural Differences

KW - Parent Child Relations

RP - NOT IN FILE

SP - Oct

EP - 311

JF - Early Education and Development

VL - .3

IS - 4

N2 - The salience of father-infant rough play in some industrialized and nonindustrialized countries around the world was reviewed, and data were presented on physical play interactions of 341 Indian mothers and fathers

with their year-old infants in the home. The authors' review of the parent-infant physical play literature failed to show that fathers had a uniformly greater propensity to engage in vigorous rough activity with infants than mothers did. The data from the observational study suggest that Indian parents are not vigorous play partners to infants. Mothers were more likely to engage in object-mediated play than were fathers. In total, the data reviewed do not support the contention that rough play is a major activity between fathers and infants across cultures. Rather, the data from parent-infant play in the nonindustrialized countries suggest that rough play may be culture specific, casting doubts about its biological underpinnings. (PsycINFO Database Record (c) 2012 APA, all rights reserved)

SN - 1040-9289

AD - Roopnarine, Jaipaul L.: Syracuse U, Child & Family Studies Dept, Syracuse, NY, US

ER -

TY - JOUR

ID - 1232

T1 - Children's perceptions of playfighting, playchasing and real fighting: A cross-national interview study

A1 - Smith, Peter K.

Y1 - 1992///

N1 - Peer Reviewed Journal: 1994-09111-001

English

Journal; Peer Reviewed Journal

KW - PsycInfo

KW - Rough and Tumble

KW - Aggressive Behavior

KW - Child Attitudes

KW - Childhood Play Behavior

RP - NOT IN FILE

SP - Sep

EP - 229

JF - Social Development

VL - .1

IS - 3

N2 - Examined rough-and-tumble play by looking at the views and beliefs held by children, in addition to perspectives from adult observers. A questionnaire was given to 192 8- and 11-yr-olds in England and southern Italy, as well as 72 English 4-6 yr olds, to obtain basic information on how Ss viewed playfighting and playchasing. Findings were generally similar for English and Italian children. Most boys and girls reported both liking, and taking part in, playchasing; liking and participation in playfighting was more divided, though more so for boys, with many children disliking the perceived risk of injury in playfighting. Most Ss reported that they could tell playfighting from a serious fight, though they thought it could lead to a serious fight, especially as a result of accidental injury. Many Ss reported that playfighting could improve one's strength or fighting skill and could be used to display strength or dominance to others. (PsycINFO Database Record (c) 2012 APA, all rights reserved)

SN - 0961-205X

AD - Smith, Peter K.: U Sheffield, England

ER -

TY - JOUR

ID - 1234

T1 - Rough-and-tumble play and social problem solving flexibility

A1 - Pellegrini, A.

Y1 - 1992///

N1 - Peer Reviewed Journal: 1993-05203-001

English

Journal; Peer Reviewed Journal

KW - PsycInfo

KW - Rough and Tumble

KW - Adaptability (Personality)

KW - Childhood Play Behavior

KW - Human Males

KW - Personality

KW - Problem Solving

KW - Social Interaction

RP - NOT IN FILE

SP - 1992, pp

EP - 26

JF - Creativity Research Journal

VL - .5

IS - 1

N2 - Investigated the relationship between boys' temperament and rough-and-tumble (R&T) play and determined the group composition of R&T, games, and other forms of reciprocal social interaction. The extent to which the vigor and flexibility components of R&T are related to social affiliation and social problem solving flexibility was explored. 13 sociometrically defined popular boys (aged 107-138 mo) were observed on their school playground during recess for 20 sessions. They nominated peers they liked most and least, ordered peers in terms of dominance, and solved hypothetical social problems. Teachers completed temperament questionnaires. R&T groups were similar to other social groupings in terms of number and dominance symmetry. The flexibility dimension of R&T was related to affiliation and social problem solving.

Temperament was minimally associated with measures of behavior. (PsycINFO Database Record (c) 2012

APA, all rights reserved)

SN - 1040-0419

AD - Pellegrini, A. D.: U Georgia, Inst for Behavioral Research, Athens, US

ER -

TY - JOUR

ID - 1235

T1 - The social nature of play fighting and play chasing: Mechanisms and strategies underlying cooperation and compromise

A1 - Boulton, Michael J.

Y1 - 1992///

N1 - Book: 1992-98504-011

English

Book; Edited Book

KW - PsycInfo

KW - Rough and Tumble

KW - Aggressive Behavior

KW - Childhood Play Behavior

KW - Theory of Evolution

KW - Cooperation

RP - NOT IN FILE

SP - 666

JF - Barkow, Jerome H [Ed]; Cosmides, Leda [Ed]; Tooby, John [Ed]

IS - 1992

N2 - (from the chapter) suggest that there are important advantages in taking an evolutionary approach to the study of r/t [rough & tumble play] / evidence suggests that this form of play may be universal to all human cultures and that, as such, it may have been shaped by natural selection acting on physiological and psychological mechanisms, in order to provide some specific benefits / for humans, there is some evidence . . . that the benefits may be related to intraspecific fighting (with hunting and predator avoidance as less likely candidates) / other considerations suggest that these and other mechanisms that generate r/t have ensured that it is a cooperative activity in which participants with differing needs are willing to compromise (PsycINFO Database Record (c) 2012 APA, all rights reserved)

AD - Boulton, Michael J.: Sheffield City Polytechnic, School of Health & Community Studies, Psychology Section, Sheffield, England

ER -

TY - JOUR

ID - 1236

T1 - Sex typing in play and popularity in middle childhood

A1 - Moller,Lora C.

Y1 - 1992///

N1 - Peer Reviewed Journal: 1992-42650-001

English

Journal; Peer Reviewed Journal

KW - PsycInfo

KW - Rough and Tumble

KW - Childhood Play Behavior

KW - Human Sex Differences

KW - Peer Relations

KW - Popularity

KW - Sex Roles

KW - Social Acceptance

RP - NOT IN FILE

SP - Apr

EP - 353

JF - Sex Roles

VL - .26

IS - 7-8

N2 - Examined sex differences in play behavior across the early elementary school years as well as the relation between sex-typed play and peer acceptance. Ss were 86 Grade 2 children (37 males, 49 females) and 81 Grade 4 children (35 males, 46 females). Popularity was assessed using a rating-scale sociometric measure. Sex-typed behaviors were measured by observing the children at free play. Boys engaged in more aggressive and rough and tumble play as well as more functional, solitary-dramatic, and exploratory play and tended to be involved more in group play, whereas girls produced more parallel and constructive play as well as more peer conversations. In Grade 4, these differences were maximized so that boys produced more games-with-rules and girls exhibited more parallel-constructive activity. (PsycINFO Database Record (c) 2012 APA, all rights reserved)

SN - 0360-0025

AD - Moller, Lora C.: U Waterloo, ON, Canada

ER -

TY - JOUR

ID - 1237

T1 - Children, play, and development

A1 - Hughes,Fergus P.

Y1 - 1991///

N1 - Book: 1992-98389-000

English

Book; Authored Book

(Created by PsycINFO) (Abbreviated) Preface Historical and theoretical viewpoints \* A definition of play Ethological and cultural perspectives The first two years of life \* Exploration and play \* Social aspects of infant and toddler play The preschool years: From two to five Play in later childhood and adolescence Gender differences in play \* Toy selection \* Fantasy play \* Rough-and-tumble play \* Games-with-rules Play in special populations \* The physically handicapped child \* The mentally handicapped child \* The emotionally disturbed child \* The child under stress: Play in the hospital Play and intellectual development \* Language play and language development \* Play, creativity, and problem solving The social benefits of play The uses of play in therapy Glossary Bibliography Subject index Author index

KW - PsycInfo

KW - Rough and Tumble

KW - Childhood Play Behavior

KW - Childhood Play Development

RP - NOT IN FILE

SP - lay, and

JF - (1991)

VL - Children, play, and development. xiv, 255 pp. Needham Heights, MA, US

N2 - (from the preface) That play is a central, all-encompassing characteristic of children's development is a major point throughout this book. The book is written primarily from the perspective of developmental psychology, and the goal was to blend the major theoretical perspectives on play with up-to-date reviews of the research literature. While the intended audience includes anyone interested in children's play, this is not a how-to book. Every effort was made to enhance the book's appeal by making it as readable as possible. However, it is hoped that the book will also challenge the reader. It is expected that this book will be used in college classrooms, either as the main text in courses on children's play or as a supplement in child development courses or in those dealing with early childhood education. (PsycINFO Database Record (c) 2012 APA, all rights reserved)

AD - Hughes, Fergus P.: U Wisconsin, Green Bay, WI, US

ER -

TY - JOUR

ID - 1238

T1 - Supporting the development of socially rejected children

A1 - Bullock, Janis R.

Y1 - 1991///

N1 - Peer Reviewed Journal: 1992-20734-001

English

Journal; Peer Reviewed Journal

KW - PsycInfo

KW - Rough and Tumble

KW - Social Acceptance

KW - Social Skills Training

RP - NOT IN FILE

SP - 15

EP - 23

JF - Early Child Development and Care

VL - .66 Jan 1991, pp. 15-23.

N2 - Describes peer status classifications and related behaviors for school children, focusing on rejected children, who tend to be unaccepted by peers in a variety of settings because they have trouble adapting to the children and play situation. Social skills interventions can be effective for young children who are having difficulty initiating, establishing, and maintaining interactions with peers. Social skills training techniques, including coaching, modeling, positive reinforcement, cognitive behavior modification, and rough and tumble play, are discussed. (PsycINFO Database Record (c) 2012 APA, all rights reserved)

SN - 0300-4430

AD - Bullock, Janis R.: Montana State U, Bozeman, US

ER -

TY - JOUR

ID - 1239

T1 - Partner preferences in middle school children's playful fighting and chasing: A test of some competing functional hypotheses

A1 - Boulton, Michael J.

Y1 - 1991///

N1 - Peer Reviewed Journal: 1992-01056-001

English

Journal; Peer Reviewed Journal

KW - PsycInfo

KW - Rough and Tumble

KW - Affection

KW - Age Differences

KW - Childhood Play Behavior

KW - Physical Strength

KW - Preferences

RP - NOT IN FILE

SP - May

EP - 193

JF - Ethology & Sociobiology

VL - .12

IS - 3

N2 - Observations of 86 middle school children (younger Ss with a mean age of 8.5 yrs and older Ss with a mean age of 11.5 yrs) participating in rough-and-tumble play (r/t) were related to sociometric data for liking and strength. Partners in r/t liked each other more than chance predicted, and tended to be closely matched for strength. Neither initiators of r/t episodes nor recipients were consistently perceived to be the strongest partner. Ss were also found to like their partners in a wide range of non-r/t activities significantly more than chance would predict. Thus children could simply choose to spend time with peers that they like, rather than r/t representing a special case. This view is supported by the finding that Ss had the same partners in a range of playground activities as they had for r/t. (PsycINFO Database Record (c) 2012 APA, all rights reserved)

SN - 0162-3095

AD - Boulton, Michael J.: U Sheffield, England

ER -

TY - JOUR

ID - 1241

T1 - A comparison of structural and contextual features of middle school children's playful and aggressive fighting

A1 - Boulton, Michael J.

Y1 - 1991///

N1 - Peer Reviewed Journal: 1991-30089-001

English

Journal; Peer Reviewed Journal

KW - PsycInfo

KW - Rough and Tumble

KW - Age Differences

KW - Aggressive Behavior

KW - Childhood Play Behavior

KW - Human Sex Differences

RP - NOT IN FILE

SP - Mar

EP - 145

JF - Ethology & Sociobiology

VL - .12

IS - 2

N2 - Compared features of rough-and-tumble of play (RTP) and aggressive fighting (AF) based on direct playground observations of 2 classes each of 8- and 11-yr-old children. Most bouts of RTP and AF were dyadic, but significantly more bouts of the former involved 3 or more participants. RTP contained more individual action patterns than AF, but the latter was more varied in form. Both wrestling and chasing were seen more in RTP than AF, but restraint in bouts of chasing was not more common in playful than aggressive chasing. Positive and neutral facial expressions were more characteristic of RTP, and negative facial expressions were more characteristic of AF. RTP initiations were more likely to receive an RTP response and less likely to receive an aggressive response than were aggressive initiations. (PsycINFO Database Record (c) 2012 APA, all rights reserved)

SN - 0162-3095

AD - Boulton, Michael J.: U Sheffield, England

ER -

TY - JOUR

ID - 1242

T1 - Antecedents of problem behaviors in children of depressed mothers

A1 - Zahn-Waxler,Carolyn; Iannotti,Ronald

Y1 - 1990///

N1 - Peer Reviewed Journal: 1991-21593-001

English

Journal; Peer Reviewed Journal

KW - PsycInfo

KW - Rough and Tumble

KW - Aggressive Behavior

KW - Behavior Problems

KW - Major Depression

KW - Offspring

KW - Mothers

RP - NOT IN FILE

SP - 1990, pp

EP - 1990,291

JF - Development and Psychopathology

VL - .2

IS - 3

N2 - Examined aggression in 2-yr-old children of 22 well and 22 depressed mothers in relation to problem behaviors at ages 5-6 yrs. Both normative (e.g., object struggles, rough play) and maladaptive (e.g., dysregulated, out-of-control behavior) forms of toddler aggression were identified in 2 or 3 play sessions. Dysregulated aggression predicted (1) externalizing problems reported by mothers at follow-up interviews when children were 5 yrs old and (2) children's reports of difficulties during a structured psychiatric interview at age 6 yrs. Problems were more frequent and continuity patterns more evident in children of depressed mothers. Early maladaptive aggression was a better predictor of later externalizing problems. Depressed mothers who used proactive childrearing approaches had children who showed fewer externalizing problems 3 yrs later. (PsycINFO Database Record (c) 2012 APA, all rights reserved)

SN - 0954-5794

AD - Zahn-Waxler, Carolyn: NIMH Lab of Developmental Psychology, Bethesda, MD, US

ER -

TY - JOUR

ID - 1244

T1 - Beyond the evil empire: Horseplay and aggression

A1 - Gergen,Mary

Y1 - 1990///

N1 - Peer Reviewed Journal: 1991-09624-001

English

Journal; Peer Reviewed Journal

KW - PsycInfo

KW - Rough and Tumble

KW - Aggressive Behavior

KW - Recreation

KW - Self Report

RP - NOT IN FILE

SP - 1990, pp

EP - 1990,398

JF - Aggressive Behavior

JA - Aggress.Behav

VL - .16

IS - 6

N2 - 75 male and 75 female undergraduates rated the extent to which they had engaged in horseplay and in aggressive acts with same-sex friends and boyfriends or girlfriends over the past 3 yrs. A broad range of playful and aggressive activities was reported. There was a strong relationship between the tendency to horseplay and to aggress. The relationship was strongest for males with male friends and for females with boyfriends. Having



steady relationships increased the likelihood that horseplay and aggressive acts would occur. Weekend alcohol consumption was related to playful activities; heavier use correlated with greater aggressive activities of males with males only. It may be useful to broaden the base for conceptualizing aggression to take into account the ways in which playful and friendly activities can facilitate those that are regarded as antisocial and aggressive. (PsycINFO Database Record (c) 2012 APA, all rights reserved)

SN - 0096-140X

AD - Gergen, Mary: Pennsylvania State U, Delaware County Campus, Media, US

ER -

TY - JOUR

ID - 1245

T1 - Rough-and-tumble play, aggression and dominance: Perception and behaviour in children's encounters

A1 - Smith, Peter K.

Y1 - 1990///

N1 - Peer Reviewed Journal: 1990-30723-001

English

Journal; Peer Reviewed Journal

KW - PsycInfo

KW - Rough and Tumble

KW - Affiliation Motivation

KW - Aggressive Behavior

KW - Childhood Play Behavior

KW - Social Skills

RP - NOT IN FILE

SP - Jul

EP - Oct

JF - Human Development

VL - .33

IS - 4-5

N2 - Examines rough-and-tumble play (RATP) and the criteria used for distinguishing RATP from fighting. Evidence is presented that children are able to use many of these criteria. RATP is considered in relation to dominance and affiliative relationships in children, and its functional significance in development is discussed. RATP may exercise social skills, but as a form of behavior it can also be used in socially manipulative ways, for example to inflict harm or achieve dominance. Implications for a social skills deficit model of aggressive behavior in childhood are considered. (PsycINFO Database Record (c) 2012 APA, all rights reserved)

SN - 0018-716X

AD - Smith, Peter K.: U Sheffield, England

ER -

TY - JOUR

ID - 1246

T1 - Characteristics of holding, patterns of play, and social behaviors between parents and infants in New Delhi, India. [References]

A1 - Roopnarine, Jaipaul L.

Y1 - 1990///

N1 - Peer Reviewed Journal: 1990-28112-001

English

Journal; Peer Reviewed Journal

KW - PsycInfo

KW - Rough and Tumble

KW - Human Sex Differences

KW - Parent Child Relations

RP - NOT IN FILE

SP - Jul

EP - 673

JF - Developmental Psychology

JA - Dev.Psychol.

VL - .26

IS - 4

N2 - Characteristics of holding, play, and social behaviors between 54 mothers and fathers and their 1-year-old infants were observed within the context of their extended families in New Delhi, India. Mothers picked up and held infants more than did fathers, and were more likely to feed and comfort them and to invest more time feeding and displaying affection to them than were fathers. When parents held infants they were more likely to display affection than to feed, comfort, or play with them. Fathers engaged in more rough play than did mothers, and mothers engaged in more peek-a-boo than did fathers. Mothers and fathers treated boys and girls quite similarly. Infants smiled at, vocalized to, and followed mothers more than they did fathers. Parents were generally preferred over relatives as social partners. The data point to the cultural specificity of certain parent-child activities. (PsycINFO Database Record (c) 2012 APA, all rights reserved)

SN - 0012-1649

AD - Roopnarine, Jaipaul L.: Syracuse U, NY, US

ER -

TY - JOUR

ID - 1247

T1 - Parental reports of early patterns of caregiving, play and discipline in India and Malaysia

A1 - Roopnarine,Jaipaul L.

Y1 - 1989///

N1 - Peer Reviewed Journal: 1998-01853-008

English

Journal; Peer Reviewed Journal

KW - PsycInfo

KW - Rough and Tumble

KW - Childrearing Practices

KW - Cross Cultural Differences

KW - Parent Child Relations

KW - Parental Role

KW - Child Discipline

KW - Dual Careers

KW - Fathers

KW - Human Sex Differences

KW - Mothers

RP - NOT IN FILE

SP - 109

EP - 120

JF - Early Child Development and Care

VL - .50 1989, pp. 109-120.

N2 - Explored early patterns of caregiving, discipline, and play between parents and their healthy 1-yr-old infants in New Delhi, India, and Kuching, Malaysia. The dual-provider families were from middle- to upper-middle-income backgrounds. The 19 Chinese Malaysian infants and the 19 Indian infants were within 4 wks of their 1st birthdays. Semi-structured interview responses indicate some redistribution of authority in terms of disciplining children, with mothers reporting a more central role. Men's participation with babies in terms of early caregiving did not depart greatly from traditional conceptions of men's roles in both cultures. Few fathers reported feeding, putting babies to bed, and changing the babies' nappies. Parents rarely engaged in rough stimulating play. Differences between the 2 cultures were noted in the use of physical punishment vs verbal feedback for discipline. (PsycINFO Database Record (c) 2012 APA, all rights reserved)

SN - 0300-4430

AD - Roopnarine, Jaipaul L.: Syracuse U, Syracuse, NY, US

ER -

TY - JOUR

ID - 1248

T1 - Individual and group similarities and dissimilarities in behaviors associated with peer status in experimental play groups. [French]

A1 - Boivin, Michel

Y1 - 1989///

N1 - Peer Reviewed Journal: 1991-71989-001

French

Journal; Peer Reviewed Journal

KW - PsycInfo

KW - Rough and Tumble

KW - Childhood Play Behavior

KW - Individual Differences

KW - Peer Relations

KW - Status

RP - NOT IN FILE

SP - 1989, pp

EP - 1989,349

JF - Science et Comportement

VL - .19

IS - 4

N2 - Studied the association of individual and group similarities and dissimilarities with peer status among school-age boys. Human subjects: 180 Canadian Black school-age boys (1st and 3rd grade). Ss were divided into 11 1st-grade and 19 3rd-grade groups, composed of 5-6 boys from different schools. Each group contained 1 popular, 1 ignored, 2 rejected, and 2 average boys. Playgroup interactions were videotaped on consecutive days; behaviors were recorded according to 5 preset categories: solitary play, prosocial interaction, rough and tumble play, reactive aggression, and dominant aggression. Stability of peer status and stability of group interaction scores were examined according to age, original status, and individual and group behavior profiles. Statistical tests were used. (English abstract) Developmental. (PsycINFO Database Record (c) 2012 APA, all rights reserved)

SN - 0841-7741

AD - Boivin, Michel: U Laval, Ecole de Psychologie, Quebec, Canada

ER -

TY - JOUR

ID - 1249

T1 - Roughhousing and fighting games among children from the perspective of comparative behavioral research: Implications for preschool and kindergarten education related to aggression and conflict. [German]

A1 - Gamber, Paul

Y1 - 1989///

N1 - Peer Reviewed Journal: 1991-70301-001

German

Journal; Peer Reviewed Journal

KW - PsycInfo

KW - Rough and Tumble

KW - Aggressive Behavior

KW - Childhood Development

KW - Childhood Play Behavior

KW - Early Intervention

KW - Preschool Students

RP - NOT IN FILE

SP - May

EP - 189

JF - Gruppendynamik

VL - .20

IS - 2

N2 - Reviews comparative behavioral research on the developmental functions of aggressive play, and discusses implications for educational interventions for nursery school and kindergarten. The research evidence

suggests that aggressive play has a socialization function in nonhuman as well as human primates and that roughhousing and play fighting do not promote aggression in children. It is recommended that preschool children be offered opportunities to engage in rough-and-tumble play and that social training be used to prevent aggressive outcomes. (English abstract) (PsycINFO Database Record (c) 2012 APA, all rights reserved)

SN - 0046-6514

AD - Gamber, Paul: Ruprecht-Karls-U Heidelberg, Germany

ER -

TY - JOUR

ID - 1250

T1 - Categorizing children's rough-and-tumble play

A1 - Pellegrini,Anthony D.

Y1 - 1989///

N1 - Peer-Reviewed Status-Unknown: 1991-09649-001

English

Journal; Peer-Reviewed Status-Unknown

KW - PsycInfo

KW - Rough and Tumble

KW - Childhood Play Behavior

KW - Aggressive Behavior

KW - Physical Contact

KW - Popularity

KW - Social Acceptance

RP - NOT IN FILE

SP - Feb

EP - 51

JF - Play & Culture

VL - .2

IS - 1

N2 - Addresses the categorization of rough-and-tumble (R&T) play and explicates a multimethod procedure for its categorization. Ethological and ethnographic methods are used with a sample of elementary school children, some of whom are defined as sociometrically popular and others as rejected. Results indicated that R&T is qualitatively different for each group to the extent that it is a playful, socially affiliative category for popular children but an aggressive category for rejected children. It may be that the ability of popular children to discriminate social information enables them to treat R&T and aggression as distinct categories. Social information processing capabilities may be an important determinant of children's social competence. (PsycINFO Database Record (c) 2012 APA, all rights reserved)

SN - 0894-4253

AD - Pellegrini, Anthony D.: U Georgia, Athens, US

ER -

TY - JOUR

ID - 1251

T1 - Sexuality in the workplace: The domination of men's sexuality

A1 - Collinson,David L.

Y1 - 1989///

N1 - Book: 1990-97260-006

English

Book; Edited Book

KW - PsycInfo

KW - Rough and Tumble

KW - Organizational Climate

KW - Sexuality

KW - Interpersonal Control

KW - Male Female Relations

KW - Organizational Structure

KW - Psychosexual Behavior

KW - Sexual Harassment

RP - NOT IN FILE

SP - CA, US

JF - Hearn, Jeff [Ed]; Sheppard, Deborah L [Ed]; Tancred-Sheriff, Peta [Ed]; Burrell, Gibson [Ed]

IS - 1989

N2 - (from the chapter) by examining in depth three empirical case studies, this chapter is intended to contribute to an understanding of the complex relationship between power and (hetero)sexuality in organizational practices / three different organizational settings that are characterized by contrasting degrees of sex segregation / all-male shop-floor context of a lorry[truck]-producing factory / 'white-collar' trade union which is . . . male dominated / major UK [United Kingdom] insurance company that employs a mixed workforce, in which women are largely confined to subordinate positions focusing on horseplay, sexual harassment and mutual sexuality, respectively, these studies illustrate the pervasiveness and dominance of men's sexuality in the workplace / illustrate the complex interrelationships which can emerge between men's definitions of male and female sexuality, and other organizational practices such as shop-floor resistance, the internal politics of trade unions, and workplace 'fiddles' [affairs] (PsycINFO Database Record (c) 2012 APA, all rights reserved)

AD - Collinson, David L.: U St Andrews, Dept of Management, Conoco Lecturer in Organizational Behaviour, St Andrews, Scotland

ER -

TY - JOUR

ID - 1252

T1 - Elementary school children's rough-and-tumble play

A1 - Pellegrini,A.

Y1 - 1989///

N1 - Peer Reviewed Journal: 1990-02917-001

English

Journal; Peer Reviewed Journal

KW - PsycInfo

KW - Rough and Tumble

KW - Age Differences

KW - Aggressive Behavior

KW - Childhood Play Behavior

KW - Elementary School Students

KW - Kindergarten Students

RP - NOT IN FILE

SP - Jun

EP - 260

JF - Early Childhood Research Quarterly

VL - .4

IS - 2

N2 - Four observers rated 48 male and 46 female kindergartners', 2nd graders', and 4th graders' rough-and-tumble play (RTP) with respect to aggression over an 8-mo period. Ss were observed during playground school recess periods. Ss' sociometric status, social problem solving, antisocial behavior, and ability to discriminate between RTP and aggression were measured. The incidence of RTP varied according to sex and playground location; RTP accounted for 11% of play behaviors. Boys engaged in significantly more RTP than did girls. Aggression rarely occurred and did not vary by age, sex, or playground location. RTP led to games with rules and was positively correlated, for boys, with social competence. Girls' RTP was positively related to antisocial behavior. (PsycINFO Database Record (c) 2012 APA, all rights reserved)

SN - 0885-2006

AD - Pellegrini, A. D.: U Georgia Inst for Behavioral Research, Athens, US

ER -

TY - JOUR

ID - 1253

T1 - What is a category? The case of rough-and-tumble play

A1 - Pellegrini, A.

Y1 - 1989///

N1 - Peer Reviewed Journal: 1990-01014-001

English

Journal; Peer Reviewed Journal

KW - PsycInfo

KW - Rough and Tumble

KW - Child Attitudes

KW - Childhood Play Behavior

KW - Popularity

KW - Social Acceptance

KW - Psychosocial Development

RP - NOT IN FILE

SP - Jul

EP - 341

JF - Ethology & Sociobiology

VL - .10

IS - 5

N2 - Interviewed 26 popular children and 16 rejected children in Grades K and 2 to determine the ways in which they differentiated and defined rough-and-tumble play (R&T) and real fighting. Prior to the interviews, which used 11 videotaped incidents, behavioral observations were made by 4 observers of children's playground behavior. Each child was observed a minimum of 112 times across the school year. Results indicate that R&T is a playful, social-interactive category for popular children, while rejected children probably do not differentiate R&T and aggression. R&T appears to serve a positive function for popular children (e.g., social affiliation).

(PsycINFO Database Record (c) 2012 APA, all rights reserved)

SN - 0162-3095

AD - Pellegrini, A. D.: U Georgia, Athens, US

ER -

TY - JOUR

ID - 1254

T1 - Young children's social competence and their use of space in day-care centers

A1 - Legendre, Alain

Y1 - 1989///

N1 - Book: 1989-98373-013

English

Book; Edited Book

KW - PsycInfo

KW - Rough and Tumble

KW - Child Day Care

KW - Childhood Play Behavior

KW - Social Skills

KW - Competence

KW - Psychosocial Development

RP - NOT IN FILE

SP - 420

JF - Schneider, Barry H [Ed]; Attili, Grazia [Ed]; Nadel, Jacqueline [Ed]; Weissberg, Roger P

IS - 1989

N2 - (from the book) makes explicit the differences between real and feigned aggression (rough-and-tumble play) / outlines the possible positive contributions of rough-and-tumble play to prosocial development and psychological adjustment / makes use of ethological theories of social dominance . . . in exploring the functions of this type of play (PsycINFO Database Record (c) 2012 APA, all rights reserved)

AD - Legendre, Alain: Ctr National de la Recherche Scientifique, Lab de Psychobiologie de l'Enfant, Paris, France

ER -

TY - JOUR

ID - 1255

T1 - Social competence in developmental perspective

A1 - Schneider, Barry H.

Y1 - 1989///

N1 - Book: 1989-98373-000

English

Book; Edited Book

(Created by PsycINFO) Preface List of contributors Section I: Social competence in developmental perspective: Conceptual issues Introduction to Section I [by] Barry H. Schneider \* Significance of peer relationship problems in childhood / Steven R. Asher and Jeffrey G. Parker / 5-23 \* The role of competence in the study of children and adolescents under stress / Norman Garnezy / 25-39 \* The nature of social action: Social competence versus social conformism / Louis Oppenheimer / 41-69 \* Individual, differential, and aggregate stability of social competence / Jens Asendorpf / 71-90 \* What to do while the kids are growing up: Changing instrumentation in longitudinal research (conversation summary) / Jane E. Ledingham \* Socially competent communication and relationship development / Steve Duck / 91-106 \* Measuring peer status in boys and girls: A problem of apples and oranges? / Tina Daniels-Beirness / 107-120 Section II: The emergence of social competence in early childhood Introduction to Section II [by] Jacqueline Nadel \* Friendships in very young children: Definition and functions (conversation summary) / Carollee Howes \* Communicating by imitation: A developmental and comparative approach to transitory social competence / Jacqueline Nadel and Anne-Marie Fontaine / 131-144 \* Co-adaptation within the early peer group: A psychobiological study of social competence / F. F. Strayer / 145-174 \* Development of communicative competencies in early childhood: A model and results / Pierre-Marie Baudonniere, Marie-Jose Garcia-Werebe, Juliette Michel and Jacqueline Liegeois / 175-193 Section III: Ongoing social development in middle childhood and adolescence Introduction to Section III [by] Barry H. Schneider Examining the impact of social behavior on peer status (conversation summary) [by] Sharon L. Foster \* Self-perpetuating processes in children's peer relationships / Toon Cillessen and Tamara J. Ferguson / 203-221 \* Types of aggressive relationships, peer rejection, and developmental consequences / John D. Coie, Christina Christopoulos, Robert Terry, Kenneth A. Dodge and John E. Lochman / 223-237 \* The role of rough-and-tumble play in the development of social competence: Theoretical perspectives and empirical evidence / Peter K. Smith / 239-255 Section IV: Setting factors in children's social development: The influences of families and schools Introduction to Section IV [by] Grazia Attili \* Young children's social competence and their use of space in day-care centers / Alain Legendre / 263-276 \* Children's social competence and social supports: Precursors of early school adjustment? / Gary W. Ladd / 277-291 \* Social competence versus emotional security: The link between home relationships and behavior problems in preschool / Grazia Attili / 293-311 \* Maternal beliefs and children's competence / Kenneth H. Rubin, Rosemary S. L. Mills and Linda Rose-Krasnor / 313-331 Section V: Translating theory into practice: Social competence promotion programs Introduction to Section V: Challenges inherent in translating theory and basic research into effective social competence promotion programs [by] Roger P. Weissberg \* Between developmental wisdom and children's social-skills training / Barry H. Schneider / 339-353 \* Enhancing peer relations in school systems / Wyndol Furman, Ronita Giberson, Allison S. White, Leslie A. Gravin and Elizabeth A. Wehner / 355-369 \* Promoting social competence in early adolescence: Developmental considerations / Marlene Zelek Caplan and Roger P. Weissberg / 371-385 Appendix: Research abstracts Subject index

KW - PsycInfo

KW - Rough and Tumble

KW - Competence

KW - Developmental Psychology

KW - Social Skills

RP - NOT IN FILE

SP - 420

JF - (1989)

VL - Social competence in developmental perspective. xix, 420 pp. New York, NY, US

N2 - (from the preface) The primary purpose of this book is to assist those interested in the scientific study of children's social competence in transcending the boundaries imposed both by geography and by selective exposure to the highly diverse schools of thought that have led to interest in this field. In Section I, entitled "Social Competence in Developmental Perspective: Conceptual Issues," the importance of social competence is

discussed and reaffirmed. Several important theoretical problems are addressed, including the definition of social competence and its relation to general adaptive ability. Important methodological dimensions, especially with respect to longitudinal investigations, are introduced. Section II is devoted to the "Emergence of Social Competence in Early Childhood." It contains deliberations as to the nature of the child's first social contacts and descriptions of the rapidly evolving forms of social exchange during the preschool years. Section III is a selective examination of "Ongoing Social Development in Middle Childhood and Adolescence." Special consideration is given to the impact of actual and pretend aggression on relations among peers. "Setting Factors in Children's Social Development: The Influences of Families and Schools" are considered in Section IV. Separate chapters within that section present evidence for the effects of families and schools on the social interaction of both preschoolers and school-age children. The final section of the book, "Translating Theory Into Practice: Social Competence Promotion Programs," focuses on applied interventions based on social development research. (PsycINFO Database Record (c) 2012 APA, all rights reserved)

AD - Schneider, Barry H.: U Ottawa, School of Psychology, Ottawa, ON, Canada

ER -

TY - JOUR

ID - 1256

T1 - War toys and childhood aggression

A1 - Sutton-Smith, Brian

Y1 - 1988///

N1 - Peer-Reviewed Status-Unknown: 1991-09665-001

English

Journal; Peer-Reviewed Status-Unknown

KW - PsycInfo

KW - Rough and Tumble

KW - Aggressive Behavior

KW - Childhood Play Behavior

KW - Toys

KW - War

RP - NOT IN FILE

SP - Feb

EP - 69

JF - Play & Culture

VL - .1

IS - 1

N2 - Evaluated 8 studies of the effects that play with war toys has on children's aggression. All of the studies were unreliable, but common findings across 7 studies were that (1) girls were not good Ss for such studies because they did not respond to war toys with aggressive behavior and (2) aggression aroused in the playroom did not carry over beyond it. This finding leads to the criticism that the studies were not sensitive to the different contexts in which they were carried out. The studies also failed to distinguish between real and playful aggression. The predominant function of war toys may be to serve as instruments in boys' playfighting, more often of the fantasy kind than of the rough-and-tumble variety. (PsycINFO Database Record (c) 2012 APA, all rights reserved)

SN - 0894-4253

AD - Sutton-Smith, Brian: U Pennsylvania, Graduate School of Education, Philadelphia, US

ER -

TY - JOUR

ID - 1257

T1 - Elementary-school children's rough-and-tumble play and social competence. [References]

A1 - Pellegrini, A.

Y1 - 1988///

N1 - Peer Reviewed Journal: 1989-08147-001

English

Journal; Peer Reviewed Journal

KW - PsycInfo



KW - Rough and Tumble  
KW - Aggressive Behavior  
KW - Childhood Play Behavior  
KW - Social Skills  
RP - NOT IN FILE  
SP - Nov  
EP - 806  
JF - Developmental Psychology  
JA - Dev.Psychol.  
VL - .24  
IS - 6

N2 - The intent of this study was to describe relations between elementary-school children's rough-and-tumble play and their social competence. Elementary-school children (Grades K, 2, and 4) were observed on the school playground during their recess periods. Results suggested that rough-and-tumble play for popular children led to games-with-rules, whereas it led to aggression for rejected children. Furthermore, popular children's rough-and-tumble was positively correlated with measures of social competence. These results are discussed in terms of the possible effects of the sociometric composition of rough-and-tumble play groups. (PsycINFO Database Record (c) 2012 APA, all rights reserved)

SN - 0012-1649  
AD - Pellegrini, A. D.: U Georgia, Inst for Behavioral Research, Athens, US  
ER -

TY - JOUR  
ID - 1258  
T1 - Rough-and-tumble play on the elementary school playground  
A1 - Pellegrini,Anthony D.  
Y1 - 1988///  
N1 - Peer-Reviewed Status-Unknown: 1989-03238-001

English  
Journal; Peer-Reviewed Status-Unknown

KW - PsycInfo  
KW - Rough and Tumble  
KW - Childhood Play Behavior  
KW - Elementary Education  
KW - Elementary School Students  
RP - NOT IN FILE  
SP - Jan  
EP - 17  
JF - Young Children  
VL - .43  
IS - 2

N2 - Defines rough-and-tumble (R&T) play among elementary school children, reviews a study of children's R&T play, and offers recommendations for incorporating such play into the curricula of young children. It is argued that R&T play has positive educational value. (PsycINFO Database Record (c) 2012 APA, all rights reserved)

SN - 0044-0728  
AD - Pellegrini, Anthony D.: U Georgia, Athens, US  
ER -

TY - JOUR  
ID - 1260  
T1 - Rough-and-tumble play: Developmental and educational significance  
A1 - Pellegrini,Anthony D.  
Y1 - 1987///

N1 - Peer Reviewed Journal: 1988-16584-001

English

Journal; Peer Reviewed Journal

KW - PsycInfo

KW - Rough and Tumble

KW - Childhood Development

KW - Childhood Play Behavior

KW - Education

RP - NOT IN FILE

SP - Win

EP - 43

JF - Educational Psychologist

VL - .22

IS - 1

N2 - Discusses the developmental and educational significance of rough-and-tumble play (RTP) in children. Ethological studies indicating a stable configuration of RTP behaviors in children are discussed. Problems in defining RTP, including the resemblance of RTP to aggression, are noted. Theories of RTP as a means of venting surplus activity are reviewed. The effects of gender differences and ecological variables (i.e., spatial density, curriculum organization, play props, indoor vs outdoor play spaces) on RTP are discussed. The functional significance of RTP is examined in terms of similarities between RTP and measures of social-cognitive development and educational achievement. (PsycINFO Database Record (c) 2012 APA, all rights reserved)

SN - 0046-1520

AD - Pellegrini, Anthony D.: U Georgia Graduate Studies Research Ctr, Inst for Behavioral Research, Athens, US

ER -

TY - JOUR

ID - 1261

T1 - Rough and tumble, friendship, and dominance in schoolchildren: Evidence for continuity and change with age

A1 - Humphreys, Anne P.

Y1 - 1987///

N1 - Peer Reviewed Journal: 1987-18420-001

English

Journal; Peer Reviewed Journal

KW - PsycInfo

KW - Rough and Tumble

KW - Age Differences

KW - Childhood Play Behavior

KW - Dominance

KW - Friendship

KW - Interpersonal Attraction

RP - NOT IN FILE

SP - Feb

EP - 212

JF - Child Development

JA - Child Dev.

VL - .58

IS - 1

N2 - Examined play-fighting and chasing activity among 7-, 9-, and 11-yr-olds (n = 29, 29, 36, respectively) in their school playground, where it took up some 10% of their time. Judging by characteristics of initiations and terminations, it tended to occur in a friendly, nonaggressive context. Sociometric information supported this interpretation. Observed rough-and-tumble partners liked each other better at all ages than chance predicted. With increasing age, the importance of strength relations in partner choice increased. 11-yr-olds tended to choose partners who were similar in strength to, but weaker than, themselves, while neither factor influenced 7-

and 9-yr-olds' choices significantly. Findings suggest that rough-and-tumble activity performs an affiliative function in young children, becoming important for dominance and fighting-skill development in older children, although immediate motivation remains nonaggressive. (PsycINFO Database Record (c) 2012 APA, all rights reserved)

SN - 0009-3920

AD - Humphreys, Anne P.: U Sheffield, England

ER -

TY - JOUR

ID - 1262

T1 - Aggressive and non-aggressive fighting in twelve-to-thirteen year old pre-adolescent boys

A1 - Neill,S.

Y1 - 1976///

N1 - Peer Reviewed Journal: 1976-29724-001

English

Journal; Peer Reviewed Journal

KW - PsycInfo

KW - Rough and Tumble

KW - Adolescent Development

KW - Aggressive Behavior

KW - Human Males

KW - Playgrounds

RP - NOT IN FILE

SP - Jul

EP - 220

JF - Child Psychology & Psychiatry & Allied Disciplines

VL - .17

IS - 3

N2 - 20 2-min ethological observations were made of each of 34 boys in a secondary school playground, covering all aspects of behavior, including fighting. Factor analyses were performed on individual behavior samples; the 2 main types of fighting were vigorous fighting, usually playful but often causing distress to the victim, and playful fighting of low intensity. Fighting of the 1st type was rare in young boys. It is suggested that the intermingling of rough play and aggression in older boys exposes aggression to social influences which in younger boys are confined to rough play. (19 ref) (PsycINFO Database Record (c) 2013 APA, all rights reserved)

SN - 0021-9630

AD - Neill, S. R.: U Warwick, Coventry, England

ER -

TY - JOUR

ID - 1264

T1 - Juvenile aggressivity and sissiness in homosexual and heterosexual males

A1 - Friedman,Richard C.

Y1 - 1980///

N1 - Peer Reviewed Journal: 1982-09723-001

English

Journal; Peer Reviewed Journal

KW - PsycInfo

KW - Rough and Tumble

KW - Aggressiveness

KW - Childhood Play Behavior

KW - Peer Relations

KW - Psychosexual Development

KW - Sex Roles

KW - Heterosexuality

KW - Human Males

KW - Male Homosexuality

RP - NOT IN FILE

SP - Jul

EP - 440

JF - Journal of the American Academy of Psychoanalysis

VL - .8

IS - 3

N2 - Attempted to replicate and extend a study by M. T. Saghir and E. Robins (1973) on childhood histories of aggressiveness in homosexual and heterosexual nonpatient males. In the present study, 17 23-48 yr old homosexual and 17 21-38 yr old heterosexual males with no history of gross psychopathology were interviewed in a semistructured format for an average of 20 hrs about types of play engaged in as children, sexual history, and emotional effects of their sexual orientation. Findings fail to replicate the similarity between one-third of the homosexuals and heterosexuals with regard to juvenile peer-group aggressivity reported by Saghir and Robins. No prehomosexual S had the type of juvenile aggressive encounters that the heterosexual Ss experienced. It is suggested that male-male peer aggressive competency learned after the juvenile period will not alter homosexual orientation, even though aggressive behavior styles may be adopted during adolescence and adulthood, and that regardless of the degree to which genetic, prenatal, and postnatal factors predispose a person to homosexuality, exposure to male-male peer aggression in a setting where a boy develops sex-typed aggressive skills during preadolescence will markedly diminish the likelihood that an exclusive, enduring homosexual orientation will occur. (PsycINFO Database Record (c) 2012 APA, all rights reserved)

SN - 0090-3604

AD - Friedman, Richard C.: New York Hosp-Cornell Medical Ctr, Westchester Div, White Plains

ER -

TY - JOUR

ID - 1265

T1 - Learning disabled children's understanding of social interactions of peers

A1 - Weiss,Elizabeth

Y1 - 1984///

N1 - Peer Reviewed Journal: 1985-12314-001

English

Journal; Peer Reviewed Journal

KW - PsycInfo

KW - Rough and Tumble

KW - Aggressive Behavior

KW - Blacks

KW - Learning Disabilities

KW - Peer Relations

KW - Social Perception

RP - NOT IN FILE

SP - Dec

EP - 615

JF - Journal of Learning Disabilities

JA - J Learn.Disabil.

VL - .17

IS - 10

N2 - Judgments of children who manifested social problems-physically aggressive and learning disabled (LD) males-were compared with judgments of children whose behavior was more appropriate. 111 Black, inner-city 11-15 yr olds were divided into 4 groups-nonaggressive learners in a mainstream setting, aggressive learners in classes for the emotionally disturbed (ED) or in day treatment, nonaggressive LD Ss in classes for the LD or resource rooms, and aggressive LD Ss in classes for LD/ED or in day treatment-and either viewed videotapes of similar children engaging in friendly, fighting, or horseplay interactions or heard verbal descriptions of the same events. No differences were found between aggressive and nonaggressive Ss, suggesting that aggressive perceivers do not necessarily "project" their own characteristics onto others. However, LD Ss, both aggressive and nonaggressive, found all scenes more unfriendly. Differences in responses to videotapes and to verbal descriptions alone suggest that conclusions about social perceptions obtained from one mode of stimulus

presentation may not generalize to other modes or to life situations. (12 ref) (PsycINFO Database Record (c) 2012 APA, all rights reserved)

SN - 0022-2194

AD - Weiss, Elizabeth: Mt Vernon Community Service Ctr, NY

ER -

TY - JOUR

ID - 1266

T1 - Concurrent and predictive correlates of sociometric status in kindergarten and Grade 1 children

A1 - Rubin, Kenneth H.

Y1 - 1983///

N1 - Peer Reviewed Journal: 1984-01110-001

English

Journal; Peer Reviewed Journal

KW - PsycInfo

KW - Rough and Tumble

KW - Peer Relations

KW - Social Approval

KW - Social Skills

KW - Status

KW - Prediction

RP - NOT IN FILE

SP - Jul

EP - 351

JF - Merrill-Palmer Quarterly

VL - .29

IS - 3

N2 - 72 kindergartners were assessed for sociometric status during free play and were administered measures of social problem solving, peer popularity and MA (as measured by the PPVT). One year later, all observations and measures were repeated with the addition of teacher ratings of social competence. Sociometric status was moderately stable from kindergarten to Grade 1. Status in kindergarten and Grade 1 was concurrently and positively correlated with the use of prosocial problem-solving strategies and positive social interactions and concurrently and negatively correlated with solitary-dramatic play. Kindergarten observations of rough-and-tumble play, solitary-functional and solitary-exploratory play, the proportion of negative peer exchanges, and agonistic social problem-solving strategies negatively predicted sociometric status in Grade 1. Kindergarten measures of parallel-constructive play, IQ, and the number of relevant social problem-solving strategies positively predicted sociometric status in Grade 1. Sociometric status in kindergarten negatively predicted solitary-functional and solitary-exploratory play; agonistic and bribe social problem-solving skills and teacher ratings of hostile-aggressive behavior. Kindergarten status positively predicted group play, game activities, and prosocial social problem-solving strategies in Grade 1. (34 ref) (PsycINFO Database Record (c) 2012 APA, all rights reserved)

SN - 0272-930X

AD - Rubin, Kenneth H.: U Waterloo, Canada

ER -

TY - JOUR

ID - 1268

T1 - Rough-and-tumble and aggression in schoolchildren: Serious play?

A1 - Neill, Sean R.

Y1 - 1985///

N1 - Peer Reviewed Journal: 1986-26927-001

English

Journal; Peer Reviewed Journal

KW - PsycInfo

KW - Rough and Tumble

KW - Aggressive Behavior

KW - Childhood Play Behavior

KW - Dominance

KW - Peer Relations

RP - NOT IN FILE

SP - Nov

EP - 1382

JF - Animal Behaviour

VL - .33

IS - 4

N2 - Argues that some types of play fighting may serve a serious purpose by allowing dominance conflicts to be resolved without disrupting social relationships. Such fights are likely to be most common at adolescence, when relative strength is changing, and between members of long-term peer groups. (15 ref) (PsycINFO Database Record (c) 2012 APA, all rights reserved)

SN - 0003-3472

AD - Neill, Sean R.: U Warwick, Coventry, England

ER -

TY - JOUR

ID - 1269

T1 - Rough-and-tumble play, fighting, and chasing in nursery school children

A1 - Smith, Peter K.

Y1 - 1985///

N1 - Peer Reviewed Journal: 1986-24231-001

English

Journal; Peer Reviewed Journal

KW - PsycInfo

KW - Rough and Tumble

KW - Aggressive Behavior

KW - Childhood Play Behavior

KW - Friendship

KW - Peer Relations

RP - NOT IN FILE

SP - 1985, pp

EP - 1985,181

JF - Ethology & Sociobiology

VL - .6

IS - 3

N2 - Examined the distinction between rough-and-tumble play (RTP) and aggressive fighting and chasing in a class of 26 preschoolers (aged 3 yrs 11 mo to 4 yrs 8 mo). Episodes differentiated by the structure of the behaviors also differed in the outcome for the Ss. RTP episodes had a larger number of participants, but a lower probability of adult intervention, than incidents of fighting. Regular partners for RTP were more likely to be liked and nominated as best friends. Replay of videotaped episodes showed that nursery staff and some of the Ss could reliably discriminate RTP from fighting; the types of criteria used included observation of the physical characteristics of actions, the verbal and physical expressions of the Ss involved, and information about the personalities of those involved. (21 ref) (PsycINFO Database Record (c) 2012 APA, all rights reserved)

SN - 0162-3095

AD - Smith, Peter K.: U Sheffield, England

ER -

TY - JOUR

ID - 1270

T1 - Gender differences: A biosocial perspective

A1 - Ehrhardt, Anke A.

Y1 - 1984///

N1 - Peer-Reviewed Status-Unknown: 1989-29120-001

English

Journal; Peer-Reviewed Status-Unknown

KW - PsycInfo

KW - Rough and Tumble

KW - Human Sex Differences

KW - Psychosexual Development

KW - Psychosocial Factors

KW - Sex Hormones

KW - Gender Identity

RP - NOT IN FILE

SP - 37

EP - 57

JF - Nebraska Symposium on Motivation

VL - .32 1984, pp. 37-57.

N2 - Proposes a dynamic interactional approach to the study of the influence of hormones on gender-related behaviors, taking constitutional and social-environmental factors into account. The main effect model, which is most often applied, postulates that one factor typically determines behavioral outcome. Principles of mammalian sexual differentiation are based on research on the interaction of hormones and behavior, with specific reference to the original so-called "central hypothesis" and "masculinization" and "defeminization." Examples from several areas of psychoendocrine research illustrate a biosocial perspective of gender identity and sex differences in behavior, such as rough-and-tumble play, nurturance, and parenting. Studies of females with prenatal exposure to sex hormones, such as estrogen diethylstilbestrol, point to influential factors on the expression of behavior within and between gender. (PsycINFO Database Record (c) 2012 APA, all rights reserved)

SN - 0070-2099

AD - Ehrhardt, Anke A.: Columbia U, New York State Psychiatric Inst, US

ER -

TY - JOUR

ID - 1272

T1 - Parent-infant play during the first year of life

A1 - Crawley, Susan B.

Y1 - 1984///

N1 - Peer Reviewed Journal: 1984-31078-001

English

Journal; Peer Reviewed Journal

KW - PsycInfo

KW - Rough and Tumble

KW - Childhood Play Behavior

KW - Childhood Play Development

KW - Father Child Relations

KW - Mother Child Relations

RP - NOT IN FILE

SP - Jan

EP - Mar

JF - Infant Behavior & Development

JA - Infant behav

VL - .7

IS - 1

N2 - Videotaped 7-, 10-, and 13-mo-old infants in their homes playing with either their father or their mother. As in previous research, it was found that more fathers used rough physical play with their infants than did mothers. For the most part, however, fathers and mothers exhibited the same developmental changes in their play. The proportion of parents using 2 stimulation forms of play (i.e., gentle and rough physical) was inversely related to increasing infant age. In contrast, more parents used 2 forms of play affording infant contribution of coordinated schemes (i.e., role games and pretend play) with 13-mo-olds than with 7-mo-olds. Similarly,

parents of older infants used coordinated object play more frequently than did parents of younger infants. Mothers decreased use of stimulation with objects and increased use of reading, while fathers used these behaviors infrequently, regardless of infant age. (11 ref) (PsycINFO Database Record (c) 2012 APA, all rights reserved)

SN - 0163-6383

AD - Crawley, Susan B.: U Illinois, Coll of Education, Chicago

ER -

TY - JOUR

ID - 1273

T1 - Social behavior patterns of nonhandicapped and developmentally disabled friend pairs in mainstream preschools

A1 - Strain, Phillip S.

Y1 - 1984///

N1 - Peer-Reviewed Status-Unknown: 1984-27295-001

English

Journal; Peer-Reviewed Status-Unknown

KW - PsycInfo

KW - Rough and Tumble

KW - Developmental Disabilities

KW - Friendship

KW - Interpersonal Interaction

KW - Preschool Students

KW - Mainstreaming (Educational)

RP - NOT IN FILE

SP - 1984, pp

EP - 28

JF - Analysis & Intervention in Developmental Disabilities

VL - .4

IS - 1

N2 - Observed during a 15-day period 15 paired nonhandicapped children and 15 dyads in which 1 child was developmentally disabled; all Ss were 38-56 mo of age and attended 10 mainstream preschools. Observational categories included reward-related activity, complimentary verbal statement, play organizer, sharing, physical assistance, rough and tumble play, affection, and conflict resolution. Results show that nonhandicapped Ss tended to select nonhandicapped friends of their own sex and age; some nonhandicapped Ss tended to select handicapped Ss older than themselves who were more advanced cognitively than other handicapped Ss and who were of the same sex. Nonhandicapped Ss directed many more initiations of reward-related activity, complimentary verbal statements, play organizers, and sharing behaviors toward nonhandicapped rather than handicapped Ss. Physical assistance, affection, and conflict resolution were directed more often toward handicapped Ss. Nonhandicapped Ss were far more likely to initiate positive social behaviors toward nonhandicapped others than were handicapped Ss. Nonhandicapped Ss responded positively at an equal level to the initiations of handicapped and nonhandicapped Ss. (35 ref) (PsycINFO Database Record (c) 2012 APA, all rights reserved)

SN - 0270-4684

AD - Strain, Phillip S.: U Pittsburgh School of Medicine

ER -

TY - JOUR

ID - 1274

T1 - Hanging tongues: A sociological encounter with the assembly line

A1 - Thompson, William E.

Y1 - 1983///

N1 - Peer-Reviewed Status-Unknown: 1985-05487-001

English

Journal; Peer-Reviewed Status-Unknown

KW - PsycInfo



KW - Rough and Tumble

KW - Blue Collar Workers

KW - Coping Behavior

KW - Interpersonal Interaction

KW - Job Characteristics

KW - Working Conditions

KW - Business Organizations

RP - NOT IN FILE

SP - Spr

EP - 237

JF - Qualitative Sociology

VL - .6

IS - 3

N2 - Conducted a 9-wk study of participant observation on an assembly line in the slaughter division of a large beef processing plant in the Midwest. Couched within a symbolic interactionist perspective, the study focused on the day-to-day activities of assembly line workers and examined the sociological aspects of the workers' interaction on the job and how they coped with the danger, strain, and monotony of the work. It also examined how the workers attempted to maintain their sense of self-worth despite the demeaning and dehumanizing aspects of their jobs. Findings show that (1) the workers had a subtle sense of unity among themselves; (2) they used techniques such as daydreaming, horseplay, and occasionally sabotage to protect their sense of self; and (3) consumer spending patterns among the workers seemed to "seal their fate" and make leaving the plant almost impossible. (33 ref) (PsycINFO Database Record (c) 2012 APA, all rights reserved)

SN - 0162-0436

AD - Thompson, William E.: Emporia State U

ER -

TY - JOUR

ID - 1275

T1 - The Northern California diet-behavior program: An empirical examination of 3,000 incarcerated juveniles in Stanislaus County Juvenile Hall

A1 - Schoenthaler, Stephen J.

Y1 - 1983///

N1 - Peer-Reviewed Status-Unknown: 1984-29660-001

English

Journal; Peer-Reviewed Status-Unknown

KW - PsycInfo

KW - Rough and Tumble

KW - Antisocial Behavior

KW - Diets

KW - Juvenile Delinquency

KW - Incarceration

KW - Sugars

RP - NOT IN FILE

SP - 1983, pp

EP - 1983,106

JF - International Journal of Biosocial Research

VL - .5

IS - 2

N2 - Retested the hypothesis that lower levels of violent crimes and antisocial acts can be effected by improved nutrition with juveniles incarcerated in a detention center for a 2-yr period. In a dietary modification, Ss were not allowed "junk" foods, which were frequently brought in by family and/or friends and used as rewards for good behavior. The facility's staff prepared nutritious snacks and treats, which did not contain as much sucrose or food additives and provided snacks such as popcorn and unsweetened orange juice rather than candy bars and soft drinks. During the following 12 mo, the incidence of serious antisocial behaviors in the male population (n = 2,005) declined 21% in contrast to the previous 12 mo, disruptions/horseplay declined 42%, and assaults/fights declined 25%. There were slight reductions in suicide attempts, verbal threats, and disobedience.

Possession of contraband was the only infraction to exhibit an increase (10%). A comparison group of 578 females on the diet found no significant differences in behavior. (15 ref) (PsycINFO Database Record (c) 2012 APA, all rights reserved)

SN - 0731-9169

AD - Schoenthaler, Stephen J.: California State Coll-Stanislaus, Turlock

ER -

TY - JOUR

ID - 1276

T1 - Types of offenses which can be reduced in an institutional setting using nutritional intervention: A preliminary empirical evaluation

A1 - Schoenthaler, Stephen J.

Y1 - 1983///

N1 - Peer-Reviewed Status-Unknown: 1984-13177-001

English

Journal; Peer-Reviewed Status-Unknown

KW - PsycInfo

KW - Rough and Tumble

KW - Antisocial Behavior

KW - Diets

KW - Juvenile Delinquency

KW - Sugars

RP - NOT IN FILE

SP - 1983, pp

EP - 84

JF - International Journal of Biosocial Research

VL - .4

IS - 2

N2 - Conducted a crossover double-blind experiment in attempting to reduce aggressive behavior in incarcerated juveniles by reducing their sugar intake. The incidence of antisocial behavior in the institution was lowered approximately 50% when contrasting the 12 mo before and after the nutritional revision. Over the 24-mo study, 276 incarcerated juveniles committed 934 infractions. During the 12 mo when Ss received a nutritionally superior diet, the incidence of assault was lowered 82%, theft was lowered 77%, horseplay was lowered 65%, refusal-to-obey-an-order was lowered 55%, general rule violations were lowered 23%, and fighting was lowered 13%. The primary consideration in the dietary revision was to reduce sugar consumption by replacing soft drinks and junk food snacks with fruit juices and nutritional snacks, and eliminating high-sugar-content desserts and cereals. (6 ref) (PsycINFO Database Record (c) 2012 APA, all rights reserved)

SN - 0731-9169

AD - Schoenthaler, Stephen J.: California State Coll-Stanislaus, Turlock

ER -

TY - JOUR

ID - 1277

T1 - Sex differences in play at kindergarten

A1 - Halliday, Jan

Y1 - 1982///

N1 - Peer Reviewed Journal: 1983-29023-001

English

Journal; Peer Reviewed Journal

KW - PsycInfo

KW - Rough and Tumble

KW - Childhood Play Behavior

KW - Human Sex Differences

KW - Kindergarten Students

KW - Preferences

KW - Teacher Student Interaction

RP - NOT IN FILE

SP - Nov

EP - 170

JF - New Zealand Journal of Educational Studies

VL - .17

IS - 2

N2 - Examined sex differences in the preferred play activities of 11 boys and 11 girls (aged 4-5 yrs) who attended an urban kindergarten and the influence of teacher participation and location of activities on such differences. Ss were observed during 9 play sessions, and play activity was recorded using a time-sampling method. Sex differences in play generally conformed to previous research. Boys had a high preference for sandpit play and other energetic outdoor activities, while girls preferred quieter, indoor activities. However, there were more similarities between the activities chosen and avoided by each sex than has previously been reported. Also, boys showed a relatively low frequency of aggression and rough play. While girls tended to choose activities in which their teachers were involved, their most-preferred activity was climbing. Although the presence of female teachers seemed to maintain many of the girls' stereotyped choices of activity, this same presence appeared to extend the range of boys' choices beyond activities that were stereotypically male. (12 ref) (PsycINFO Database Record (c) 2012 APA, all rights reserved)

SN - 0028-8276

AD - Halliday, Jan: U Auckland, New Zealand

ER -

TY - JOUR

ID - 1278

T1 - Changes in interpersonal distances and categories of play behavior in the early weeks of preschool.

[References]

A1 - Shea,John D.

Y1 - 1981///

N1 - Peer Reviewed Journal: 1981-28948-001

English

Journal; Peer Reviewed Journal

KW - PsycInfo

KW - Rough and Tumble

KW - Childhood Play Behavior

KW - Human Sex Differences

KW - Longitudinal Studies

KW - Nursery School Students

KW - Preschool Education

KW - Age Differences

RP - NOT IN FILE

SP - Jul

EP - 425

JF - Developmental Psychology

JA - Dev.Psychol.

VL - .17

IS - 4

N2 - Observations of 57 children were made using time lapse and moving film techniques in a preschool over a 10-wk period. Ss attended 5, 3, or 2 days/wk. Behavior was recorded in 5 categories: aggressive behavior, rough and tumble behavior, distance from the nearest child, distance from the teacher, and frequency of close proximity; a 6th category, play behavior, was related to the potential for social interaction in preschool play. Behavior was related to measures of attendance at preschool, preschool group, age, and sex via multiple regression analyses. Scores on all measures of social interaction except aggressive behavior increased with preschool experience. The 3 preschool groups showed different degrees of change, and this was directly related to the number of days of attendance at preschool. (20 ref) (PsycINFO Database Record (c) 2012 APA, all rights reserved)

SN - 0012-1649

AD - Shea, John D.: U Newcastle, Australia

ER -

TY - JOUR

ID - 1279

T1 - Rough and tumble play: A function of gender. [References]

A1 - DiPietro, Janet A.

Y1 - 1981///

N1 - Peer Reviewed Journal: 1981-07763-001

English

Journal; Peer Reviewed Journal

KW - PsycInfo

KW - Rough and Tumble

KW - Aggressive Behavior

KW - Childhood Play Behavior

KW - Human Sex Differences

RP - NOT IN FILE

SP - Jan

EP - 58

JF - Developmental Psychology

JA - Dev. Psychol.

VL - .17

IS - 1

N2 - Investigated rough and tumble play (RTP), a prosocial behavior whose expression and purpose varies as a function of gender, in 43 preschoolers, part of a longitudinal sample (targets), and 86 playmates (partners). A "playroom on wheels" was designed to maximize the amount of RTP displayed in same-sex triads.

Observational coding techniques were devised to record various active and verbal behaviors, including a measure of activity level. Results indicate both quantitative and qualitative differences in the behaviors of the male and female triadic groups. Further, a robust sex difference in the amount and intensity of RTP was observed for both targets and partners. Analyses of the behavioral components indicated that RTP was distinct from other dominance-oriented or aggressive behaviors in this age group. A hypothesis concerning differential salience of interpersonal cues is presented to account for these findings, and speculations are made concerning the influence of RTP on subsequent development. (18 ref) (PsycINFO Database Record (c) 2012 APA, all rights reserved)

SN - 0012-1649

AD - DiPietro, Janet A.: Stanford U

ER -

TY - JOUR

ID - 1280

T1 - Convergence of parent and observer ratings of temperament with observations of peer interaction in nursery school

A1 - Billman, Jean

Y1 - 1980///

N1 - Peer Reviewed Journal: 1980-26485-001

English

Journal; Peer Reviewed Journal

KW - PsycInfo

KW - Rough and Tumble

KW - Nursery School Students

KW - Peer Relations

KW - Personality Measures

KW - Personality

KW - Social Interaction

KW - Observation Methods

KW - Psychosocial Development

RP - NOT IN FILE

SP - Jun

EP - 400

JF - Child Development

JA - Child Dev.

VL - .51

IS - 2

N2 - In a study with 78 34-64 mo olds, convergence between temperament ratings from 2 sources (mothers and observers) and observer codings of peer-peer interaction was assessed. Activity level, approach-withdrawal, intensity, distractibility, and sensory threshold correlated significantly with 1 or more variables in the N. G. Blurton-Jones (1972) peer-interaction categories. Ss classified as having more difficult temperaments exhibited more rough-and-tumble and aggressive behaviors than those with easier temperaments. Significant relationships between the Behavioral Style Questionnaire and the Teacher Temperament Questionnaire were demonstrated in 6 of the 7 categories common to both, in spite of the 4-6 mo period that separated the ratings. Results are discussed in terms of the relationship between temperament and social behavior in early childhood. (8 ref) (PsycINFO Database Record (c) 2012 APA, all rights reserved)

SN - 0009-3920

AD - Billman, Jean: Winona State U

ER -

TY - JOUR

ID - 1281

T1 - Re-thinking "banana time": Symbolic integration in a work setting

A1 - Handelman,Don

Y1 - 1976///

N1 - Peer-Reviewed Status-Unknown: 1980-08537-001

English

Journal; Peer-Reviewed Status-Unknown

KW - PsycInfo

KW - Rough and Tumble

KW - Business and Industrial Personnel

KW - Recreation

KW - Rites (Nonreligious)

KW - Work (Attitudes Toward)

KW - Working Conditions

KW - Alienation

KW - Occupational Stress

RP - NOT IN FILE

SP - Jan

EP - 448

JF - Urban Life

VL - .4

IS - 4

N2 - Presents a theoretical reinterpretation of D. F. Roy's observations of the repetitive sequences of ritual horseplay among 3 punchpress operators. Expressive action and work activity are posited as complementary modes of reaction to alienating work. Seemingly ridiculous rituals are seen to be symbolic constructions of the workers' interrelatedness. (21 ref) (PsycINFO Database Record (c) 2012 APA, all rights reserved)

AD - Handelman, Don: Hebrew U, Jerusalem, Israel

ER -

TY - JOUR

ID - 1282

T1 - One-hundred ten feminine and masculine boys: Behavioral contrasts and demographic similarities

A1 - Green,Richard

Y1 - 1976///

N1 - Peer Reviewed Journal: 1977-12673-001

English

Journal; Peer Reviewed Journal

KW - PsycInfo

KW - Rough and Tumble

KW - Demographic Characteristics

KW - Femininity

KW - Human Males

KW - Masculinity

KW - Sex Roles

KW - Family Background

RP - NOT IN FILE

SP - Sep

EP - 446

JF - Archives of Sexual Behavior

JA - Arch.Sex Behav

VL - .5

IS - 5

N2 - Reports interview data from an ongoing study in which 60 boys, referred for extensive cross-gender behavior, and their families were compared with a matched group of 50 boys showing typical gender/role behavior and their families. There were no significant differences between families on a variety of demographic variables, including ages or educational levels of mothers or fathers, number of children per family, ordering of younger and older siblings, ethnic background, religion, political party affiliation, or current marital status of the families. Compared to masculine boys, feminine boys participated less in sports and rough-and-tumble play; were more often voluntary loners or rejected by peers; related better to girls (vs boys) of the same age; were more frequent cross-dressers; reported that female-type dolls were their favorite toy (17%); had greater interest in play-acting and taking roles in fantasy games; commented more frequently on their mothers' clothing; more often verbalized the wish to grow up to be like their mothers or to have been born a girl (83%); more often preferred their mothers (masculine boys were divided in affection between parents or preferred their fathers); were more likely to have been hospitalized at least once; and were more often separated from their biological fathers before age 5. (PsycINFO Database Record (c) 2012 APA, all rights reserved)

SN - 0004-0002

AD - Green, Richard: State U New York, Stony Brook

ER -

TY - JOUR

ID - 1283

T1 - Reflection-impulsivity and behavioral problems in emotionally disturbed boys

A1 - Finch,A.

Y1 - 1976///

N1 - Peer Reviewed Journal: 1976-26146-001

English

Journal; Peer Reviewed Journal

KW - PsycInfo

KW - Rough and Tumble

KW - Behavior Problems

KW - Cognitive Style

KW - Emotional Disturbances

RP - NOT IN FILE

SP - Jun

EP - 274

JF - The Journal of Genetic Psychology: Research and Theory on Human Development

VL - .128

IS - 2

N2 - To investigate the difference in the behavioral problems presented by cognitively impulsive and reflective emotionally disturbed boys, the parents of 17 impulsive and 13 reflective males (mean age, 11.32 yrs; chosen by

scores on the Matching Familiar Figures Test) in residential treatment were asked to rate their sons' behavior. Results indicate that in contrast to reflective Ss, impulsives were more likely to talk of others blaming them unfairly, threaten to harm themselves, hit and bully other children, and be excessively rough in play. On the other hand, reflectives were more unwilling to talk with adults outside the family. Results are discussed in terms of supporting both previous research and J. Kagan and N. Kogan's (1970) "fear of failure" hypothesis.

(PsycINFO Database Record (c) 2012 APA, all rights reserved)

SN - 0022-1325

AD - Finch, A. J.: Virginia Treatment Ctr for Children, Richmond

ER -

TY - JOUR

ID - 1284

T1 - Sex-related stereotyping of toddlers' behaviors

A1 - Fagot, Beverly I.

Y1 - 1973///

N1 - Peer Reviewed Journal: 1974-04887-001

English

Journal; Peer Reviewed Journal

KW - PsycInfo

KW - Rough and Tumble

KW - Childhood Play Development

KW - Human Sex Differences

KW - Sex Roles

KW - Social Perception

KW - Stereotyped Attitudes

RP - NOT IN FILE

SP - Nov

JF - Developmental Psychology

JA - Dev. Psychol.

VL - .9

IS - 3

N2 - Investigated whether 45 male and 57 female 20-25 yr olds who had little or no contact with young children would have stereotypes regarding sex-appropriate behavior for toddlers. Ss rated each of 38 behaviors of 2 yr olds as appropriate to either boys, girls, or both sexes. Only 6 behaviors were sex-typed by more than 5 Ss. Rough-house play, play with transportation toys, and aggressive behavior were considered masculine, whereas play with dolls, "dressing up," and looking in the mirror were considered feminine. Significantly more males sex-typed behaviors than did females. Reasons why girls show less sex-typing in their play behaviors than boys are briefly discussed. (PsycINFO Database Record (c) 2012 APA, all rights reserved)

SN - 0012-1649

AD - Fagot, Beverly I.: U. Oregon

ER -

TY - JOUR

ID - 1285

T1 - Aspects of social development in nursery school children with emphasis on introduction to the group

A1 - McGrew, W.

Y1 - 1972///

N1 - Book: 1973-26477-009

English

Book; Edited Book

KW - PsycInfo

KW - Rough and Tumble

KW - Childhood Development

KW - Group Participation

KW - Social Behavior

RP - NOT IN FILE

SP - 400

JF - Jones, N

VL - Blurton.

IS - 1972

N2 - Observed the social behavior of 12 3-5 yr. olds introduced singly into a nursery school containing 15 children during 5-day periods immediately after entry and 3 mo. later. Ss' behavior at entry varied greatly, but the group's reaction to the S was a more consistent neutral curiosity. During the 1st day, S was subdued and exhibited signs of ambivalence; nursery members were indifferent or friendly, but not hostile. Conspicuous changes in S's behavior occurred within 5 days of entry. Nervous exploration decreased and social approaches (including antagonism) increased, but participation in "rough-and-tumble play" was rare. Ss were behaviorally indistinguishable from the others after 3 mo. Unexpected daily consistencies were found in some behavioral pattern frequencies within morning observation periods. The usefulness of comparing social development in human and nonhuman primates is discussed. (26 ref.) (PsycINFO Database Record (c) 2012 APA, all rights reserved)

ER -

TY - JOUR

ID - 1286

T1 - Categories of child-child interaction

A1 - Jones,N.

Y1 - 1972///

N1 - Book: 1973-26477-006

English

Book; Edited Book

KW - PsycInfo

KW - Rough and Tumble

KW - Age Differences

KW - Aggressive Behavior

KW - Childhood Play Development

KW - Interpersonal Interaction

KW - Sex Linked Developmental Differences

RP - NOT IN FILE

SP - 400

JF - Jones, N

VL - Blurton.

IS - 1972

N2 - Observed the free play of 13 4-yr-olds and 12 2-yr-olds selected as being the oldest or the youngest of their sex in playgroups of mixed ages and sexes. The occurrence of 22 previously defined items of behavior (e.g., hit and smile) was continuously recorded during each of 15 5-min periods. Inter-S correlations of the behavior items occurring within each observation period revealed 3 main factors: "rough-and-tumble play vs. work," "aggression," and "social behavior." A less reliable "distress" dimension was also found. Comparisons of behavior between the age and sex groups and across Ss tended to dissect the aggression dimension. Ss who showed more rough-and-tumble play showed less aggression, but evidence suggests that this was because they were less often in aggression-provoking situations. Males did more wrestling and hitting during rough-and-tumble play than females. The amount of behavior directed toward the teacher decreased with age in males but not in females. The main dimension of between-S variation concerned all social behavior, age, and experience in the nursery. Working alone and watching children seemed to be younger forms of behavior. Subsidiary dimensions of between-S variation were play with toys vs. without toys and active or passive interaction. (PsycINFO Database Record (c) 2012 APA, all rights reserved)

ER -

TY - JOUR

ID - 1287

T1 - PERSONALITY CHARACTERISTICS OF THE CHILD ACCIDENT REPEATER

A1 - MANHEIMER,DEAN I.

Y1 - 1967///



N1 - Peer Reviewed Journal: 1967-10267-001

English

Journal; Peer Reviewed Journal

KW - PsycInfo

KW - Rough and Tumble

KW - Accident Prevention

KW - Accident Proneness

KW - Accidents

KW - Personality Development

KW - Personality

KW - Cerebrovascular Accidents

KW - Personality Traits

RP - NOT IN FILE

SP - 1967, pp

EP - 1967,513

JF - Child Development

JA - Child Dev.

VL - .38

IS - 2

N2 - FROM 8874 BOYS AND GIRLS AGES 4-18, 684 WERE SELECTED TO REPRESENT HIGH-, INTERMEDIATE-, OR LOW-ACCIDENT-LIABILITY CHILDREN, BASED ON RECORDS OF MEDICALLY ATTENDED INJURIES. USING DATA FROM INTENSIVE INTERVIEWS WITH MOTHERS SUPPLEMENTED WITH SCHOOL RECORDS, A STATISTICALLY SIGNIFICANT RELATION BETWEEN ACCIDENT LIABILITY AND INDEXES OF EXTRAVERSION, DARING, ROUGHHOUSING, AND OTHER TRAITS TENDING TO EXPOSE CHILDREN TO HAZARDS WAS FOUND. SIMILAR RELATIONS HELD FOR TRAITS SUCH AS POOR DISCIPLINE, AGGRESSIVENESS TOWARD PEERS, AND, FOR GIRLS, ATTENTION-SEEKING, WHICH COMPETE WITH THE CHILD'S ABILITY TO COPE WITH HAZARDS. OTHER TRAITS THAT MAY IMPAIR ABILITY TO COPE WITH HAZARDS WERE ALSO FOUND TO BE RELATED TO ACCIDENT LIABILITY (IMPULSIVITY, CARELESSNESS, AND UNRELIABILITY) AS WERE SEVERAL INDEXES DENOTING MALADJUSTMENT. (19 REF.) (PsycINFO Database Record (c) 2012 APA, all rights reserved)

SN - 0009-3920

AD - MANHEIMER, DEAN I.: LANGLEY PORTER NEUROPSYCHIATRIC INST., SAN FRANCISCO, CALIF

ER -

TY - JOUR

ID - 1288

T1 - The "buddy system" in the hospital treatment of alcoholics

A1 - Androes,L.

Y1 - 1966///

N1 - Peer Reviewed Journal: 1966-13322-001

English

Journal; Peer Reviewed Journal

KW - PsycInfo

KW - Rough and Tumble

KW - Alcohol Rehabilitation

KW - Alcoholism

KW - Hospitalized Patients

KW - Hospitals

RP - NOT IN FILE

SP - 1966, pp

EP - 1966,529

JF - Quarterly Journal of Studies on Alcohol

VL - .27

IS - 3

N2 - The buddy, or pairing, system was introduced to the group treatment program at a veterans administration hospital in 1963. During the 1st yr. 90 male patients participated in a trial of the buddy system. The mean age of the patients was 45 yr., most came from lower or middle class backgrounds, were unemployed, and reported approximately 15 yr. of heavy drinking. As the patients were voluntarily admitted to the 90-day inpatient program each was arbitrarily assigned to a fellow patient as a buddy. The successful pairs were friendly, close, mutually supportive, and shared personal problems which they were reluctant to present to a staff member. The unsuccessful pairs were mutually destructive or destructive toward the group as a whole, usually in the form of horseplay, undermining the confidence of the buddy, encouraging manipulation of or, most importantly, discouraging communication with the staff. It was concluded that the buddy system is a useful management device. The patients became more prompt in arriving at assignments and group meetings, and it became easier to maintain communication and organization within the program. (PsycINFO Database Record (c) 2012 APA, all rights reserved)

SN - 0033-5649

AD - Androes, L.: Veterans Administration Hosp., Topeka, Kan

ER -

TY - JOUR

ID - 1289

T1 - Art therapy and aggression

A1 - Kramer, Edith

Y1 - 1958///

N1 - Book: 2009-02640-007

English

Book; Authored Book

KW - PsycInfo

KW - Rough and Tumble

KW - Aggressive Behavior

KW - Art Therapy

KW - Painting (Art)

KW - Conflict

KW - Personality

KW - Psychotherapeutic Processes

RP - NOT IN FILE

SP - 238

JF - Kramer, Edith

IS - 1958

N2 - (from the chapter) This chapter examines how art therapy is used to address aggression at the Wiltwyck School. It is noted that life at Wiltwyck School is colored by the prevalence of aggression. Even the boys' amiable small talk and play consists for the most part of insults, threats, profanity, and aggressive horseplay. The children's habitual response to all conflicts and adversity seems limited to aggressive acts, tantrums, and destructiveness. Because aggression is so ubiquitous and undifferentiated, it hides rather than reveals the children's personalities. It seemed, therefore, best to approach the specific problem of aggression in art therapy only after the reader had become more familiar with the children and their painting. (PsycINFO Database Record (c) 2012 APA, all rights reserved)

ER -

TY - JOUR

ID - 1290

T1 - Symbiosis and consensus as integrative factors in small groups

A1 - Gross, Edward

Y1 - 1956///

N1 - Peer Reviewed Journal: 1957-02698-001

English

Journal; Peer Reviewed Journal

KW - PsycInfo

KW - Rough and Tumble

RP - NOT IN FILE

SP - 174

EP - 179

JF - American Sociological Review

VL - .21 1956, pp. 174-179.

N2 - Data were gathered at an Air Defense Command base relative to group participation in 6 informal activities: eating lunch, drinking coffee, bull sessions, horseplay and joking on the job, leaving the air site, and spending time off the air site. Group composition was studied in each case. Results indicated that symbiotic groups (in which members were interdependent because each satisfied some important need of his fellow) tended to be composed of men of dissimilar or contrasting characteristics. Consensual groups (in which the members shared a goal or value or viewpoint) tended to be composed of men of like characteristics. (PsycINFO Database Record (c) 2012 APA, all rights reserved)

SN - 0003-1224

ER -

TY - JOUR

ID - 1291

T1 - Out-of-school living of eleven-year-old boys and girls from differing socioeconomic groups

A1 - Volberding,Eleanor

Y1 - 1949///

N1 - Peer Reviewed Journal: 1949-04713-001

English

Journal; Peer Reviewed Journal

KW - PsycInfo

KW - Rough and Tumble

RP - NOT IN FILE

SP - 348

EP - 353

JF - The Elementary School Journal

VL - .49 1949, pp. 348-353.

N2 - 80 eleven-year-old children from a midwestern community were grouped according to socioeconomic status and sex, all but one of the children falling into the lower-middle, upper-lower, and lower-lower classes. The lower-lower class children had smaller living space, lower activity in play, lower preferences for twilight, competitive group and rough play and listened to the radio less than those children from the higher groups. The upper-lower class child appeared to have more freedom than the middle-class child, and to have sufficient security and nourishment for strenuous living. The middle-class children had social confidence, security and social experience, and were more restricted in their behavior by parents. The lower-lower class children were insecure, non-aggressive, and lacking in prestige, their social experience and confidence being undermined by lack of status of the family group. (PsycINFO Database Record (c) 2012 APA, all rights reserved)

SN - 0013-5984

AD - Volberding, Eleanor: U. Utah, Salt Lake City

ER -

TY - JOUR

ID - 1292

T1 - Out-of-school behavior of eleven-year-olds

A1 - Volberding,E.

Y1 - 1948///

N1 - Peer Reviewed Journal: 1949-01706-001

English

Journal; Peer Reviewed Journal

KW - PsycInfo

KW - Rough and Tumble

RP - NOT IN FILE

EP - 441

JF - The Elementary School Journal

VL - .432-441 1948,

N2 - Data regarding out-of-school activities over a one-year period were obtained on 80 eleven-year-old children from a midwestern community. These data were collected by means of an individual map test, by interviews with adults and children, observation, questionnaires, compositions, and standardized tests. All the children belonged to small intimate play groups, and participated occasionally in the larger neighborhood play groups; the living space of the children was found to be quite restricted. The majority liked twilight play and competitive group play, but disliked rough play. Family social status was a differentiating factor in play preferences. Movies (western, action, comedy), roller skating, and radio (mysteries, comic programs, westerns) followed after play with other children in order of importance. Little recreational reading or club membership was reported. Similarities and differences compared with adolescent interests and activities are pointed out. (PsycINFO Database Record (c) 2012 APA, all rights reserved)

SN - 0013-5984

AD - Volberding, E.: U. Utah, Salt Lake City

ER -

TY - JOUR

ID - 1293

T1 - Growing up emotionally

A1 - Arlitt, Ada Hart

Y1 - 1938///

N1 - Book: 2008-17447-006

English

Book; Authored Book

KW - PsycInfo

KW - Rough and Tumble

KW - Adolescent Development

KW - Developmental Stages

KW - Emotional Development

KW - Love

RP - NOT IN FILE

SP - 242

EP - Hill

JF - Arlitt, Ada Hart

IS - 1938

N2 - (from the chapter) There are many phases of emotional development characteristic of the adolescent period. The child has passed from the stage of the gang to that of "the crowd." Where the gang went in search of adventure, the crowd usually just sits around and talks. The stage of crowd talking is followed after a brief period of "roughhousing." While the adolescent is engaged in rough play and teasing with people of the opposite sex, he tends to fall in love with people older than himself, usually at such a distance from his home that he cannot hope to meet them in person. The next level is the time of the puppy love affair. After the stage of puppy love children begin to make the selection of the person whom they intend to marry. Somewhere between the first puppy love affair and the choice of a permanent mate there occurs a period during which adolescents wish no interference with their activities and they will tell little of their day's activities. While not all children may go through all stages in this process, it is nevertheless not the parents' business to prevent the child from attaining mature development. (PsycINFO Database Record (c) 2012 APA, all rights reserved)

AD - Arlitt, Ada Hart: Graduate School of Arts and Sciences, University of Cincinnati, Cincinnati, OH, US

ER -

TY - JOUR

ID - 1295

T1 - Perspective and practices to address rough-and-tumble play in the school setting: A survey of school-wide positive behavior support teams in Utah

A1 - Basinger, Jason Christopher

Y1 - 2013///

N1 - Dissertation Abstract: 2013-99220-216

English

Dissertation Abstract

KW - PsycInfo

KW - Rough and Tumble

KW - Behavior Problems

KW - School Based Intervention

KW - Schools

KW - Bullying

KW - Teams

RP - NOT IN FILE

SP - No

JF - Dissertation Abstracts International: Section B: The Sciences and Engineering

VL - .74

IS - 5-B(E)

N2 - Prior research of rough-and-tumble play (RTP) has shown mixed results-different definitions, varying functions, and positive and negative outcomes. Few researchers have studied interventions to address RTP in school settings. With unclear evidence of RTP outcomes and the extent school interventions are addressing RTP in school settings, this study explored the extent and effectiveness of intervention programs being implemented to prevent/reduce negative outcomes of RTP in elementary schools. A survey was created and conducted with 30 school problem-solving teams in a western state to obtain information concerning RTP in elementary school settings. Teams provided estimated percentages of RTP leading to beneficial and problematic behaviors, types of benefits or problems resulting from RTP, specific prevention/intervention programs that teams report implementing to address RTP concerns, percentage estimations of students responding to implemented interventions, and training needs to address interventions for RTP concerns. Survey responses showed higher estimated percentages for problematic outcomes than beneficial outcomes. Additionally, the greater number of problem items were endorsed by teams than the number of benefit items, suggesting RTP is more often problematic than beneficial. Interventions estimated to be effective in treating problematic RTP outcomes are reward systems, social skills trainings, active supervision, and bully prevention. These study findings are different from previous research, which concluded that RTP was harmless and/or beneficial to students, and might be due to setting differences (school vs. community). It might be estimated that schools should monitor or prevent RTP to avoid problems, such as aggression, bullying, and poor peer relationships. Programs frequently used by teams targeted skill acquisition through social skills training, anger management, and bully prevention. This study provides understanding to the extent RTP should be addressed in schools. School problem solving teams report that RTP can be problematic in school settings; however, it can be prevented with school-wide intervention, and intervened with individual and small-group interventions. (PsycINFO Database Record (c) 2013 APA, all rights reserved)

SN - 0419-4217

AD - Basinger, Jason Christopher: Utah State U., US

ER -

TY - JOUR

ID - 1296

T1 - Would a rose, by any other name, smell sweeter? [References]

A1 - Bentall, Richard P.

Y1 - 2013///

N1 - Peer Reviewed Journal: 2013-22213-021

English

Journal; Peer Reviewed Journal

KW - PsycInfo

KW - Rough and Tumble

KW - Diagnosis

KW - Psychosis

KW - Schizophrenia

KW - Stigma

RP - NOT IN FILE

SP - Jul

EP - 1562

JF - Psychological Medicine

VL - .43

IS - 7

N2 - Methods of psychiatric classification have numerous uses, ranging from the clinical (communication between clinicians, the facilitation of decisions about treatment), to the scientific (selecting participants for research into the aetiology and treatment of mental illness), through to the social and political (keeping statistics about mental health, developing mental health policy). Schizophrenia has been a contested label for many years not only because it is associated with stigma, but also because it fails to achieve any of the purposes for which it was originally designed. Even in the world of operationalized diagnostic criteria, different definitions of schizophrenia sometimes define different people as schizophrenic. In carefully conducted studies in which patients are followed up over time, patients sometimes move from one diagnosis to another within the psychosis spectrum and diagnostic shifts, for example between schizophrenia and bipolar disorder, are probably much more common in the rough and tumble of routine psychiatric care. To persuade the general public to be more accepting of people with mental illness, we must persuade them that psychosis arises, in part, understandably from adverse life experiences (while of course acknowledging that genetic factors must play some role), that it does not necessarily lead to violence, and that recovery is possible. Fortunately, there is now a considerable volume of research that supports this position. (PsycINFO Database Record (c) 2013 APA, all rights reserved)

SN - 0033-2917

AD - Bentall, Richard P.: Institute of Psychology, Health & Society, Liverpool University, Liverpool, United Kingdom

ER -

TY - JOUR

ID - 1297

T1 - Presidential courage: Brave leaders and how they changed America 1789-1989. [References]

A1 - Beschloss, Michael

Y1 - 2007///

N1 - Book: 2007-09209-000

English

Book; Authored Book

(Created by PsycINFO) Preface A speedy death to general Washington! Kick this treaty to hell! The damnedest liar He may retire with undiminish'd glory Rivalries irritated to madness Oh, that I was a soldier! Rocks and quicksands on all sides The most splendid diamond in my crown I will kill it! Not a man to be forced I was born for the storm Who would have had the courage? I am going to be beaten Too angelic for this devilish rebellion A well-meaning baboon The country will be saved I see dynamite Black storm A rough-and-tumble man I upset them all We must protect the chief! Gloom personified Salute your Caesar? We have avoided a putsch No people except the Hebrews The right place at the right time How could this have happened? I am Cyrus! They never show their passion Go get him, Johnny boy! It's going to be a civil war A man has to take a stand We win and they lose! It left me greatly depressed Don't worry that I've lost my bearings A miracle has taken place

Epilogue: Presidential courage Notes Sources Acknowledgments Index

KW - PsycInfo

KW - Rough and Tumble

KW - Courage

KW - History

KW - Leadership

KW - Politicians

RP - NOT IN FILE

SP - 430

JF - (2007)

VL - Presidential courage

N2 - (from the jacket) Michael Beschloss has brought us a brilliantly readable and inspiring saga about crucial times in America's history when a courageous President dramatically changed the future of the United States. With surprising new sources and a dazzling command of history and human character, Beschloss brings to life these flawed, complex men--and their wives, families, friends and foes. Never have we had a more intimate,

behind-the-scenes view of Presidents coping with the supreme dilemmas of their lives. As Beschloss shows in this gripping and important book, none of these Presidents was eager to incur ridicule, vilification or threats of political destruction and even assassination. But in the end, bolstered by friends and family, hidden private beliefs and, sometimes, religious faith, each ultimately proved himself to be, in Andrew Jackson's words, "born for the storm." (PsycINFO Database Record (c) 2012 APA, all rights reserved)

ER -

TY - JOUR

ID - 1298

T1 - The impractical man

A1 - Blackford, Katherine M.

Y1 - 1916///

N1 - Book: 2009-03134-008

English

Book; Authored Book

KW - PsycInfo

KW - Rough and Tumble

KW - Occupational Guidance

KW - Occupational Success

KW - Person Environment Fit

KW - Personality Traits

KW - Personality

KW - Arts

KW - Business

KW - Intelligence

KW - Occupational Aspirations

KW - Philosophies

KW - Sciences

KW - Working Conditions

RP - NOT IN FILE

SP - reprinted

EP - 221

JF - Blackford, Katherine M

VL - H; Newcomb, Arthur.

IS - 1916, reprinted 1920

N2 - (from the chapter) Using the life of Sydney Williams as an example, the authors describe the personality and intellect of impractical men. Although they have good intellects, and should be fitted to intellectual rather than manual labor, they often fail to find a good occupational match. When they fail, it is more often through their own incompetence; they usually dissipate their assets by impracticable schemes. The only hope for such men is to learn their limitations; to learn that, even though they may be ambitious for commercial success, they are utterly unqualified for it; that, although they may wish to do something in the way of production or selling, they have neither talent, courage, secretiveness, persistence, nor other qualities necessary for a success in these lines. They are too credulous. They are too impractical. They are too lacking in fighting qualities, and, therefore, too easily imposed upon. They are usually lazy physically and find disagreeable situations hard, so that they are out of place in the rough-and-tumble, strenuous, hurly-burly of business, manufacturing, or ordinary professional life. The authors provide a few stories to indicate what these men can do, do well, and what they can be happy and satisfied in doing: there is a real need for them in the world. These vocations include authors, scientists, philosophers, poets, actors, preachers, teachers, lecturers, and musicians. These people deal with abstractions, ideas, with theories, and with emotions. They may be very successful in the spinning of theories, in the working out of clever ideas, and in their appeal to the emotions of their fellowmen. They may write poetry which is the product of genius; they may devise profound philosophy. This is their realm. Here is where they are supreme, and it is in this kind of work they find an expression for all of their talent. (PsycINFO Database Record (c) 2012 APA, all rights reserved)

ER -

TY - JOUR

ID - 1299

T1 - Individual-group behavioral similarity and peer status in experimental play groups of boys: the social misfit revisited

A1 - Boivin,M.

A1 - Dodge,K.A.

A1 - Coie,J.D.

Y1 - 1995/08//

N1 - Boivin, M. Dodge, K A. Coie, J D

Journal of personality and social psychology

jn3, 0014171

IM

Journal Article. Research Support, Non-U.S. Gov't. Research Support, U.S. Gov't, P.H.S.

English

KW - Medline

KW - Rough and Tumble

KW - Child

KW - Child Behavior

KW - Humans

KW - Interpersonal Relations

KW - Male

KW - Peer Group

KW - Play and Playthings

KW - Social Behavior

RP - NOT IN FILE

SP - 269

EP - 279

JF - Journal of Personality & Social Psychology

JA - J Pers.Soc Psychol.

VL - 69

IS - 2

CY - UNITED STATES

N2 - This study evaluated individual-group similarity and dissimilarity hypotheses generally stipulating that the behavioral correlates of status are moderated by the peer group context in which they are displayed. Thirty play groups of 5 or 6 unacquainted same-age boys participated in five 45-min sessions. Five behaviors described group and individual characteristics: reactive aggression, proactive aggression, solitary play, rough-and-tumble play, and positive interactive behavior. Individual social preference scores were computed following a variant of the J. D. Coie and K. A. Dodge (1983) procedure. The behavioral correlates of emerging peer status were examined as a function of the group's behavioral norms. Evidence of a dissimilarity effect was found for solitary play and reactive aggression whereas positive interactive behavior followed a rule of similarity

SN - 0022-3514

AD - Ecole de Psychologie, Universite Laval Ste-Foy, Quebec, Canada

UR - 7643305

ER -

TY - JOUR

ID - 1300

T1 - Violent content enhances video game performance. [References]

A1 - Bosche,Wolfgang

Y1 - 2009///

N1 - Peer Reviewed Journal: 2009-23969-001

English

Journal; Peer Reviewed Journal

KW - PsycInfo

KW - Rough and Tumble

KW - Aggressive Behavior

KW - Computer Games



KW - Performance

KW - Violence

RP - NOT IN FILE

SP - 2009, pp

EP - 2009,150

JF - Journal of Media Psychology: Theories, Methods, and Applications

VL - .21

IS - 4

N2 - This study assesses the impact of violent video game content on players' game performance. According to the desensitization hypothesis (Carnagey, Anderson, & Bushman, 2007), violent content may elicit negative affective responses and inhibitions, which in turn should interfere with performance. On the other hand, the players might understand virtual violent acts as a digital form of rough-and-tumble play, associated with positive emotions and mobilization, which in turn should raise performance. To test these competing hypotheses on game performance, N = 50 males with no prior violent gaming experience were exposed to three different versions of a custom-made video game in which the actions to be performed were identical, though they were audio-visually presented to appear either nonviolent, moderately, or extremely violent. The results show no indication of an initial inhibition of aggressive behavior, that is, performance is elevated and remains so if the action is presented audio-visually as being violent. This supports the notion that being involved in violent video game activity is perceived as an essentially harmless acting-out of playful fighting behavior. (PsycINFO Database Record (c) 2012 APA, all rights reserved) (journal abstract)

SN - 1864-1105

AD - Bosche, Wolfgang: Department of Psychology, Technische Universitat Darmstadt, Darmstadt, Germany

ER -

TY - JOUR

ID - 1301

T1 - Violent video games prime both aggressive and positive cognitions. [References]

A1 - Bosche,Wolfgang

Y1 - 2010///

N1 - Peer Reviewed Journal: 2010-26441-001

English

Journal; Peer Reviewed Journal

KW - PsycInfo

KW - Rough and Tumble

KW - Aggressive Behavior

KW - Cognitions

KW - Computer Games

KW - Violence

RP - NOT IN FILE

SP - 2010, pp

EP - 2010,146

JF - Journal of Media Psychology: Theories, Methods, and Applications

VL - .22

IS - 4

N2 - Previous studies have shown that violent video games prime aggressive thoughts and concepts. Interestingly, positively valenced test stimuli are rarely used in this field, though they might provide useful information on the nature of the emotional response to virtual violence and its associative structure. According to the General Aggression Model (GAM) and its extensions (Carnagey, Anderson, & Bushman, 2007), normal negative reactions to violence are expected. Alternatively, playing violent video games might be construed as engaging in positively valenced playful fighting behavior. To test the potential of violent video games to prime positive concepts, N = 29 adult males played either a violent or a nonviolent video game for 20 minutes and were subsequently tested in a standard lexical decision task consisting of positive, aggressive, nonaggressive negative, and neutral target words. The data show that the violent video game primed aggressive concepts as expected, but also raised positive concepts, and did so independently of the participants' history of playing violent video games. Therefore, the results challenge the idea that violent video games inherently stimulate negative concepts only. (PsycINFO Database Record (c) 2012 APA, all rights reserved) (journal abstract)

SN - 1864-1105

AD - Bosche, Wolfgang: Technische Universita Darmstadt, Darmstadt, Germany

ER -

TY - JOUR

ID - 1302

T1 - In praise of a rough-and-tumble life

A1 - Brenna,O.V.

Y1 - 2008/01//

N1 - Brenna, Oreste V

Trends in immunology

dx, 100966032

IM

Comment. Letter

English

KW - Medline

KW - Rough and Tumble

KW - Allergens/im [Immunology]

KW - Environmental Exposure

KW - Humans

KW - Hypersensitivity/et [Etiology]

KW - Hypersensitivity/im [Immunology]

KW - Immune System/ph [Physiology]

KW - Skin/im [Immunology]

RP - NOT IN FILE

SP - 1

EP - 2

JF - Trends in Immunology

JA - Trends Immunol.

VL - 29

IS - 1

CY - England

SN - 1471-4906

UR - 18194757

ER -

TY - JOUR

ID - 1303

T1 - Juvenile horseplay purpura

A1 - Brockmann,K.

A1 - Diepold,K.

Y1 - 2002/10//

N1 - Brockmann, Knut. Diepold, Katharina

Archives of dermatology

6wu, 0372433

AIM, IM

Case Reports. Letter

English

KW - Medline

KW - Rough and Tumble

KW - Child

KW - Diagnosis

KW - Differential

KW - Female

KW - Humans

KW - Lumbar Vertebrae

KW - Purpura/di [Diagnosis]  
KW - Purpura/et [Etiology]  
KW - Vasculitis  
KW - Leukocytoclastic  
KW - Cutaneous/di [Diagnosis]  
KW - Cutaneous/et [Etiology]  
RP - NOT IN FILE  
SP - 1384  
JF - Archives of Dermatology  
JA - Arch.Dermatol.  
VL - 138  
IS - 10  
CY - United States  
SN - 0003-987X  
UR - 12374559  
ER -

TY - JOUR  
ID - 1304

T1 - Bored employees misbehaving: The relationship between boredom and counterproductive work behaviour.  
[References]

A1 - Bruursema, Kari  
Y1 - 2011///

N1 - Peer Reviewed Journal: 2011-26444-001  
English

Journal; Peer Reviewed Journal  
KW - PsycInfo

KW - Rough and Tumble  
KW - Boredom

KW - Employee Productivity  
KW - Organizational Behavior

KW - Personnel  
RP - NOT IN FILE

SP - Apr  
EP - 107

JF - Work & Stress  
VL - .25

IS - 2

N2 - In this study, the relationships among boredom proneness, job boredom, and counter-productive work behaviour (CWB) were examined. Boredom proneness consists of several factors, which include external stimulation and internal stimulation. Given the strong relationships between both the external stimulation factor of boredom proneness (BP-ext) and anger as well as the strong relationship between trait anger and CWB, we hypothesized that examining BP-ext would help us to better understand why employees commit CWB. Five types of CWB have previously been described: abuse against others, production deviance, sabotage, withdrawal and theft. To those we added a sixth, horseplay. Using responses received from 211 participants who were recruited by email from throughout North America (112 of them matched with co-workers), we found support for our central premise. Indeed, both BP-ext and job boredom showed significant relationships with various types of CWB. The boredom proneness factor also moderated the relationship between job boredom and some types of CWB, suggesting that a better understanding of boredom is imperative for designing interventions to prevent CWB. (PsycINFO Database Record (c) 2012 APA, all rights reserved) (journal abstract)

SN - 0267-8373

AD - Bruursema, Kari: Department of Psychology, Montclair State University, Upper Montclair, NJ, US  
Kessler, Stacey R.: Department of Management and Information Systems, School of Business, Montclair State University, Upper Montclair, NJ, US  
Spector, Paul E.: Department of Psychology, University of South, Tampa, FL, US

ER -

TY - JOUR

ID - 1305

T1 - Ischemic cerebellar infarct in a 5-year-old boy: sequela to minor back trauma

A1 - Byrd,L.R.

A1 - Vogel,H.L.

Y1 - 1996/04//

N1 - Byrd, L R. Vogel, H L

The Journal of the American Osteopathic Association

7503065, g90

IM

Case Reports. Journal Article

English

KW - Medline

KW - Rough and Tumble

KW - Anti-Inflammatory Agents

KW - Brain Ischemia/di [Diagnosis]

KW - Brain Ischemia/dt [Drug Therapy]

KW - Brain Ischemia/et [Etiology]

KW - Cerebellar Diseases/di [Diagnosis]

KW - Cerebellar Diseases/dt [Drug Therapy]

KW - Cerebellar Diseases/et [Etiology]

KW - Cerebrovascular Disorders/di [Diagnosis]

KW - Cerebrovascular Disorders/dt [Drug Therapy]

KW - Cerebrovascular Disorders/et [Etiology]

KW - Child

KW - Preschool

KW - Humans

KW - Magnetic Resonance Imaging

KW - Male

KW - Prednisolone/tu [Therapeutic Use]

KW - Wounds and Injuries/co [Complications]

RP - NOT IN FILE

SP - 245

EP - 249

JF - Journal of the American Osteopathic Association

JA - J Am Osteopath.Assoc.

VL - 96

IS - 4

CY - UNITED STATES

N2 - Minor trauma, a kick to the center of the back during roughhousing with an 8-year-old sibling, produced an ischemic cerebellar infarct in a 5-year-old boy. The boy was brought to medical attention because of vomiting and headache. He also had ataxia. Results of laboratory studies, structural examination, and cerebrospinal fluid analysis were noncontributory. An irregular, low-density region in the left cerebellar hemisphere of unknown cause was seen on computed tomography scans. Magnetic resonance imaging (MRI) revealed an area of signal alteration hyperintense on the T2-weighted image and mildly hyperintense on the proton-density image in the leftward cerebellar hemisphere. The distribution was most compatible with that of an acute superior cerebellar arterial infarction. No other abnormalities were detected. The patient was treated with oral prednisolone, recovered, and had no further episodes or sequelae. The authors recommend that post-traumatic stroke be considered early in the differential diagnosis of a child with the triad of symptoms seen in the patient described. They suggest that glucocorticoid therapy on a short-term basis may have a place in more rapid resolution of symptoms

SN - 0098-6151

AD - Grandview Hospital, Dayton, Ohio, USA

UR - 8935430

ER -

TY - JOUR

ID - 1306

T1 - Play preferences of typically developing children and children with developmental delays between ages 3 and 7 years. [References]

A1 - Case-Smith,Jane; Kuhaneck,Heather Miller

Y1 - 2008///

N1 - Peer Reviewed Journal: 2008-01654-004

English

Journal; Peer Reviewed Journal

KW - PsycInfo

KW - Rough and Tumble

KW - Childhood Play Behavior

KW - Delayed Development

KW - Measurement

KW - Preferences

KW - Age Differences

KW - Human Sex Differences

KW - Rating

RP - NOT IN FILE

SP - Win

EP - 29

JF - OTJR: Occupation, Participation and Health

VL - .28

IS - 1

N2 - This cross-sectional survey research investigated play preferences of children with and without developmental delays who were between 3 and 7 years old. Parents completed questionnaires regarding their child's play activity and context preferences. Valid results were obtained for 166 children, 83 of whom had developmental delays. Preference ratings were compared by gender, age, and delay status. Play preference did not differ by gender. Rough-and-tumble play and computer/video game play increased with age, whereas object exploration decreased. Children with developmental delays had higher preferences for rough-and-tumble play and object exploration and lower preferences for drawing and coloring, construction, and doll and action figurine play than typically developing children. This comparison of children's play preferences across ages, gender, and developmental status enhances our understanding of how these variables influence children's play. (PsycINFO Database Record (c) 2012 APA, all rights reserved) (journal abstract)

SN - 1539-4492

AD - Case-Smith, Jane: Division of Occupational Therapy, School of Allied Medical Professions, Ohio State University, Columbus, OH, US Kuhaneck, Heather Miller: Sacred Heart University, Fairfield, CT, US

ER -

TY - JOUR

ID - 1307

T1 - Effects of personal and social responsibility on fair play in sports and self-control in school-aged youths. [References]

A1 - Cecchini,Jose A.

Y1 - 2007///

N1 - Peer Reviewed Journal: 2008-00163-002

English

Journal; Peer Reviewed Journal

KW - PsycInfo

KW - Rough and Tumble

KW - Self Control

KW - Social Responsibility

KW - Sports

RP - NOT IN FILE

SP - Dec

EP - 211

JF - European Journal of Sport Science

VL - .7

IS - 4

N2 - In this study, we examined the impact of Hellison's (1995) model for the development of personal and social responsibility on fair play and self-control in youth. One hundred and eighty-six students from three public schools with a mean age of 13.6 years were assigned to one of three treatment groups: experimental group A (n = 63), experimental group B (n = 62), and a control group (n = 61). During 10 one-hour sessions of beginners' five-a-side soccer, group A went through five levels of the programme, whereas group B went through only four levels as the transferral phase was not introduced. Findings revealed that subsequent to the intervention programme, group A improved personal feedback, delayed gratification, self-control, and process self-regulation. Groups A and B showed an improvement in indicators of personal and social responsibility regarding enjoyment and sportsmanship and a decrease in variables related to the drive to win, rough play, contact fouls, and poor sportsmanship. No significant changes were observed in the control group. (PsycINFO Database Record (c) 2012 APA, all rights reserved) (journal abstract)

SN - 1746-1391

AD - Cecchini, Jose A.: Department of Education, University of Oviedo, Oviedo, Spain Montero, Javier: Department of Education, University of Oviedo, Oviedo, Spain Alonso, Alicia: Department of Education, University of Oviedo, Oviedo, Spain Izquierdo, Mikel: Studies, Research and Sport Medicine Centre, Government of Navarra, Spain Contreras, Onofre: Department of Physical Education, University of Castilla-La Mancha, Spain

ER -

TY - JOUR

ID - 1308

T1 - The perpetration of school violence in Taiwan: An analysis of gender, grade level and school type.

[References]

A1 - Chen, Ji-Kang; Astor, Ron Avi

Y1 - 2009///

N1 - Peer Reviewed Journal: 2010-01084-002

English

Journal; Peer Reviewed Journal

KW - PsycInfo

KW - Rough and Tumble

KW - Grade Level

KW - Human Sex Differences

KW - School Environment

KW - School Violence

KW - Sociocultural Factors

RP - NOT IN FILE

SP - Dec

EP - 584

JF - School Psychology International

VL - .30

IS - 6

N2 - Using a nationally representative sample in Taiwan, this study aims to describe the prevalence of perpetration of school violence in Taiwan. The study explores how gender, age and school type relate to students' perpetration of violence in an Asian culture context. The sample included 14,022 students from elementary to high schools in grades 4 to 12. Students were given an anonymous questionnaire to report their violent behaviour in schools. The findings presented in this study provide insight on why perpetrators commit violent acts against their peers. Findings suggest the prevalence of perpetration may vary from setting to setting but the influences of age, gender and school type on violence tend to be similar in Taiwan to what theories expect based on studies done in Western cultures. A majority of perpetrators reported engaging in violence stemming from rough and tumble play or from situations where they were initially having fun. Findings suggest that promoting the quality of peer interactions could be a major violence prevention strategy. (PsycINFO Database Record (c) 2012 APA, all rights reserved) (journal abstract)

SN - 0143-0343

AD - Chen, Ji-Kang: Department of Social Work, Chinese University of Hong Kong, Hong Kong, China Astor, Ron Avi: Urban Social Development, University of Southern California, Schools of Social Work and Education, Los Angeles, CA, US

ER -

TY - JOUR

ID - 1309

T1 - In the beginning: American boyhood and the life stories of gay men. [References]

A1 - Cohler, Bertram J.

Y1 - 2009///

N1 - Book: 2009-01644-013

English

Book; Edited Book

KW - PsycInfo

KW - Rough and Tumble

KW - History

KW - Male Homosexuality

KW - Narratives

KW - Stereotyped Attitudes

KW - Childhood Play Behavior

KW - Interests

RP - NOT IN FILE

SP - 474

JF - Hammack, Phillip L [Ed]; Cohler, Bertram J [Ed]

IS - 2009

N2 - (from the chapter) Personal accounts of self-identified gay men writing or telling about their lives during the post-World War II period have emphasized rejection of such gender-stereotyped boyhood interests as "rough-and-tumble" play and "tough-guy" denial of feelings. These accounts often emphasize awareness of oneself as different from other boys and early childhood recognition of unusual interest in other boys and men. This chapter discusses the impact of the American "boy code" from the boy books of the nineteenth century to our own time upon present representations of boyhood in the accounts of men self-identifying as gay. These men represent four postwar generation-cohorts: (1) men who came of age in the 1960s, a time of nascent activism; (2) men who came of age in the 1970s with the emergence of the gay rights movement; (3) men who came of age in the 1980s with the appearance of the AIDS pandemic; and (4) men who came of age in the 1990s, when same-sex desire had become a recognized lifeway among urban men. (PsycINFO Database Record (c) 2012 APA, all rights reserved)

AD - Cohler, Bertram J.: Dept of Comparative Human Development, U Chicago, Chicago, IL, US

ER -

TY - JOUR

ID - 1310

T1 - Connections between the ivory tower and the multicolored world: linking abstract theories of social justice to the rough and tumble of affirmative action

A1 - Crosby, F.J.

A1 - Franco, J.L.

Y1 - 2003///

N1 - Crosby, Faye J. Franco, Jamie L

Personality and social psychology review : an official journal of the Society for Personality and Social Psychology, Inc

9703164

IM

Journal Article. Research Support, Non-U.S. Gov't

English

KW - Medline

KW - Rough and Tumble

KW - Humans  
KW - Prejudice  
KW - Psychological Theory  
KW - Public Policy  
KW - Social Justice  
RP - NOT IN FILE  
SP - 363  
EP - 373  
JF - Personality & Social Psychology Review  
JA - Pers.Soc Psychol.Rev  
VL - 7  
IS - 4  
CY - United States

N2 - This article seeks to combine the social psychologist's interest in articulating and testing concepts with the public policymaker's interest in the effective implementation of specific policies and programs. The first part of the article applies knowledge about distributive and procedural justice to understanding some of the opposition to affirmative action. The application also reveals some lacunae-specifically concerning rule change-in how social psychologists have looked at procedural justice issues. In the second part of the article, we discuss the problem of rule change and propose a set of conceptualizations about the conditions that govern people's reactions to rule change. We end by reflecting on some changes in our studies of procedural justice

SN - 1088-8683

AD - Department of Psychology, University of California, Santa Cruz 95064, USA. fjcrosby@ucsc.edu

UR - 14633472

ER -

TY - JOUR

ID - 1311

T1 - Molecular characterisation of rough strains of *Vibrio cholerae* isolated from diarrhoeal cases in India and their comparison to smooth strains

A1 - De,K.

A1 - Ramamurthy,T.

A1 - Faruque,S.M.

A1 - Yamasaki,S.

A1 - Takeda,Y.

A1 - Nair,G.B.

A1 - Nandy,R.K.

Y1 - 2004/03/12/

N1 - De, Keya. Ramamurthy, Thandavarayan. Faruque, Shah M. Yamasaki, Shinji. Takeda, Yoshifumi. Nair, G Balakrish. Nandy, Ranjan K

FEMS microbiology letters

fml, 7705721

IM

Journal Article. Research Support, Non-U.S. Gov't

English

KW - Medline

KW - Rough and Tumble

KW - Bacterial Proteins/bi [Biosynthesis]

KW - Bacterial Proteins/ge [Genetics]

KW - Bacteriophages/ge [Genetics]

KW - Bacteriophages/ph [Physiology]

KW - Cholera/mi [Microbiology]

KW - Cholera Toxin/bi [Biosynthesis]

KW - Cholera Toxin/ge [Genetics]

KW - DNA-Binding Proteins/bi [Biosynthesis]

KW - DNA-Binding Proteins/ge [Genetics]

KW - Diarrhea/mi [Microbiology]



KW - Feces/mi [Microbiology]  
KW - Gene Expression Regulation  
KW - Bacterial  
KW - Genes  
KW - Genomic Islands/ge [Genetics]  
KW - Humans  
KW - India  
KW - Lysogeny  
KW - Molecular Epidemiology  
KW - O Antigens/an [Analysis]  
KW - O Antigens/ge [Genetics]  
KW - Ribotyping  
KW - Transcription Factors/bi [Biosynthesis]  
KW - Transcription Factors/ge [Genetics]  
KW - Transcription  
KW - Genetic  
KW - Transduction  
KW - *Vibrio cholerae*/cl [Classification]  
KW - *Vibrio cholerae*/ge [Genetics]  
KW - *Vibrio cholerae*/ip [Isolation & Purification]  
KW - Virulence Factors/an [Analysis]  
KW - Virulence Factors/ge [Genetics]  
RP - NOT IN FILE  
SP - 23  
EP - 30  
JF - FEMS Microbiology Letters  
JA - FEMS Microbiol.Lett.  
VL - 232  
IS - 1  
CY - Netherlands  
N2 - Sixteen of the 18 *Vibrio cholerae* rough strains isolated from hospitalised diarrhoea patients were found to contain O1 serotype-specific (wbe) genes and all currently known virulence genes. Expression of the regulatory element ToxR was evident in these strains. Cholera toxin production ability of the rough strains was found to be higher (c. three- to five-fold) as compared to the smooth counterparts and this was transcriptionally regulated. Strains exhibiting the rough phenotype were more amenable to the uptake of CTXphi, which led us to consider that the rough phenotype could play a role in the generation of genetic diversity among *V. cholerae* strains  
SN - 0378-1097  
AD - Division of Microbiology, National Institute of Cholera and Enteric Diseases, P33 CIT Road, Scheme XM, Kolkata 700 010, India  
UR - 15019730  
ER -  
  
TY - JOUR  
ID - 1312  
T1 - Dangerous horseplay  
A1 - Dixon,B.  
Y1 - 2010/11//  
N1 - Dixon, Bernard  
The Lancet infectious diseases  
101130150  
IM  
Case Reports. Journal Article  
English  
KW - Medline  
KW - Rough and Tumble  
KW - Animals

KW - Communicable Disease Control/mt [Methods]  
KW - Corynebacterium diphtheriae/ip [Isolation & Purification]  
KW - Corynebacterium diphtheriae/py [Pathogenicity]  
KW - Diphtheria/th [Therapy]  
KW - Diphtheria/tm [Transmission]  
KW - Diphtheria/ve [Veterinary]  
KW - Horse Diseases/mi [Microbiology]  
KW - Horse Diseases/th [Therapy]  
KW - Horse Diseases/tm [Transmission]  
KW - Horses  
KW - Humans  
KW - Male  
KW - Zoonoses/mi [Microbiology]  
KW - Zoonoses/tm [Transmission]  
RP - NOT IN FILE  
SP - 741  
JF - The Lancet Infectious Diseases  
JA - Lancet Infect.Dis.  
VL - 10  
IS - 11  
CY - United States  
SN - 1474-4457  
AD - dixonadams@blueyonder.co.uk  
UR - 21029983  
ER -  
  
TY - JOUR  
ID - 1313  
T1 - Peer status and aggression in boys' groups: developmental and contextual analyses  
A1 - Dodge,K.A.  
A1 - Coie,J.D.  
A1 - Pettit,G.S.  
A1 - Price,J.M.  
Y1 - 1990/10//  
N1 - Dodge, K A. Coie, J D. Pettit, G S. Price, J M  
Child development  
0372725, d28  
IM  
Journal Article. Research Support, U.S. Gov't, P.H.S.  
English  
KW - Medline  
KW - Rough and Tumble  
KW - Aggression/px [Psychology]  
KW - Child  
KW - Gender Identity  
KW - Humans  
KW - Leadership  
KW - Male  
KW - Peer Group  
KW - Personality Development  
KW - Play and Playthings  
KW - Rejection (Psychology)  
KW - Social Dominance  
KW - Social Environment  
KW - Sociometric Techniques  
RP - NOT IN FILE

SP - 1289

EP - 1309

JF - Child Development

JA - Child Dev.

VL - 61

IS - 5

CY - UNITED STATES

N2 - The social transactions of popular, rejected, neglected, and average first- and third-grade boys were examined during their initial encounters with peers. 23 groups of 5 or 6 boys each were observed for 45-min free-play sessions conducted on 5 consecutive days, with sociometric interviews following each session. Social preference in the play groups correlated significantly with classroom social preference after the third and subsequent play sessions for the third graders, and after the fourth and subsequent sessions for the first graders. The observational coding system distinguished 4 types of aggressive behavior that were hypothesized to relate to peer status in different ways. The first, rough play, was not related to peer status. However, rejected boys at both ages displayed significantly higher rates of angry reactive aggression and instrumental aggression than average boys. The relation between bullying and peer status varied with the age of the child. Popular first graders engaged in more bullying than average first graders, but popular third graders did not differ from average in bullying. Other questions concerned the temporal relation between play group behaviors and social preference scores within the group. Socially interactive behaviors anteceded high preference by peers, and low preference in turn led to social isolation in subsequent sessions

SN - 0009-3920

AD - Vanderbilt University, Nashville, TN 37203

UR - 2245725

ER -

TY - JOUR

ID - 1314

T1 - Raising boys without men: How maverick moms are creating the next generation of exceptional men

A1 - Drexler, Peggy

Y1 - 2005///

N1 - Book: 2006-04190-000

English

Book; Authored Book

(Created by PsycINFO) Acknowledgments Introduction The Bad Rap against Mothers Good News from the New Home Front Tapping into Boy Power Finding Their Own Role Models Head-and-Heart Boys The Mental Work of Mothering Staying Connected Collected Families Conclusion: Only Connect Endnotes Index

KW - PsycInfo

KW - Rough and Tumble

KW - Family Structure

KW - Father Absence

KW - Parenting Style

KW - Single Mothers

KW - Sons

KW - Sex Role Attitudes

RP - NOT IN FILE

SP - 224

JF - (2005)

VL - Raising boys without men

N2 - (from the jacket) According to prevailing wisdom, a boy must be raised with a man in the house; otherwise, he's bound to be a failure. That same wisdom tells us that mothers left to their own devices will smother their sons and turn them into sissies, and that sons of unmarried mothers are destined to a life of crime. Peggy Drexler, Ph.D., wasn't quite convinced that this "common" knowledge was accurate or true, so she embarked on a groundbreaking study that compared boys from female-headed households with boys from traditional mom-and-dad families. The results were published in a reputable peer-reviewed journal, and they were so heartening that Dr. Drexler expanded her study into Raising Boys without Men, which is an examination of these boys and their amazing mothers. Rebutting confidently spouted opinions to the contrary,

Dr. Drexler's research shows that boys raised without fathers are socially savvy, generous, caring communicators, while still remaining extremely "boyish"--passionate about sports and adept at roughhousing with friends. These boys' maverick moms are pioneering a new form of parenting which rejects social judgments about family structure and gender stereotype and stresses the importance of communication, community, and love. These brave women have much to teach us about a better way to raise tomorrow's men. (PsycINFO Database Record (c) 2012 APA, all rights reserved)

AD - Drexler, Peggy: Weill Medical College of Cornell University, NY, US

ER -

TY - JOUR

ID - 1315

T1 - Laundry. The rough and tumble of tendering

A1 - Drummond,P.

Y1 - 1986/04/10/

N1 - Drummond, P

The Health service journal

8605800, g4f

H

Journal Article

English

KW - Medline

KW - Rough and Tumble

KW - Contract Services

KW - Financial Management

KW - Great Britain

KW - Laundry Service

KW - Hospital/og [Organization & Administration]

KW - State Medicine

RP - NOT IN FILE

SP - 488

EP - 489

JF - Health Service Journal

JA - Health Serv J

VL - 96

IS - 4994

CY - ENGLAND

SN - 0952-2271

UR - 10276766

ER -

TY - JOUR

ID - 1316

T1 - Unexpected consequences of rough play with friends

A1 - Edmiston,J.

Y1 - 2012/10//

N1 - Edmiston, Julie

JAAPA : official journal of the American Academy of Physician Assistants

9513102

T

Case Reports. Journal Article

English

KW - Medline

KW - Rough and Tumble

KW - Bronchi

KW - Bronchography

KW - Child

KW - Cough/et [Etiology]  
KW - Foreign Bodies/et [Etiology]  
KW - Foreign Bodies/ra [Radiography]  
KW - Foreign Bodies/th [Therapy]  
KW - Foreign Bodies  
KW - Friends  
KW - Humans  
KW - Male  
KW - Play and Playthings  
RP - NOT IN FILE  
SP - 59  
EP - 60  
JF - JAAPA  
VL - 25  
IS - 10  
CY - United States  
SN - 1547-1896  
UR - 23115875  
ER -

TY - JOUR  
ID - 1317  
T1 - Gender differences in temperament: a meta-analysis  
A1 - Else-Quest,N.M.  
A1 - Hyde,J.S.  
A1 - Goldsmith,H.H.  
A1 - Van Hulle,C.A.  
Y1 - 2006/01//  
N1 - Else-Quest, Nicole M. Hyde, Janet Shibley. Goldsmith, H Hill. Van Hulle, Carol A  
Psychological bulletin  
0376473, qe8  
IM

Journal Article. Meta-Analysis. Research Support, Non-U.S. Gov't  
English

KW - Medline  
KW - Rough and Tumble  
KW - Female  
KW - Humans  
KW - Male  
KW - Personality  
KW - Personality Development  
KW - Psychological Theory  
KW - Sex Factors  
KW - Temperament  
RP - NOT IN FILE  
SP - 33  
EP - 72  
JF - Psychological Bulletin  
JA - Psychol.Bull.  
VL - 132  
IS - 1  
CY - United States

N2 - The authors used meta-analytical techniques to estimate the magnitude of gender differences in mean level and variability of 35 dimensions and 3 factors of temperament in children ages 3 months to 13 years. Effortful control showed a large difference favoring girls and the dimensions within that factor (e.g., inhibitory control:  $d = -.41$ , perceptual sensitivity:  $d = -0.38$ ) showed moderate gender differences favoring girls, consistent with

boys' greater incidence of externalizing disorders. Surgency showed a difference favoring boys, as did some of the dimensions within that factor (e.g., activity:  $d = 0.33$ , high-intensity pleasure:  $d = 0.30$ ), consistent with boys' greater involvement in active rough-and-tumble play. Negative affectivity showed negligible gender differences

SN - 0033-2909

AD - Department of Psychology, University of Wisconsin--Madison, Madison, WI 53706, USA.

nmelse@wisc.edu

UR - 16435957

ER -

TY - JOUR

ID - 1319

T1 - Rough-and-tumble play and the development of physical aggression and emotion regulation: A five-year follow-up study. [References]

A1 - Flanders, Joseph L.

Y1 - 2010///

N1 - Peer Reviewed Journal: 2010-05206-001

English

Journal; Peer Reviewed Journal

KW - PsycInfo

KW - Rough and Tumble

KW - Aggressive Behavior

KW - Childhood Development

KW - Childhood Play Behavior

KW - Emotional Regulation

RP - NOT IN FILE

SP - May

EP - 367

JF - Journal of Family Violence

VL - .25

IS - 4

N2 - This is a follow-up to a study demonstrating that rough-and-tumble play was related to physical aggression in the preschool years. Fathers reported on the frequency of father-child rough-and-tumble play interactions, and the degree to which fathers were dominant in the play dyad was observed and coded from play interactions. In this follow-up study, school-aged children's physically aggressive behaviors and emotion regulation abilities were assessed with questionnaires 5 years later. Higher frequencies of father-child rough-and-tumble play in the preschool years were associated with more physical aggression and worse emotion regulation 5 years later for children whose fathers were less dominant, over and above the effects of physical aggression in the preschool years. Rough-and-tumble play was unrelated to these measures among children whose fathers were more dominant during play. This study shows that early rough-and-tumble play continues to be related to children's psychosocial adjustment over time, and that the effect remains moderated by the quality of the father-child relationship during play. (PsycINFO Database Record (c) 2012 APA, all rights reserved) (journal abstract)

SN - 0885-7482

AD - Flanders, Joseph L.: Department of Psychology, McGill University, Montreal, PQ, Canada Simard, Melissa: Department of Psychology, Concordia University, Montreal, PQ, Canada Paquette, Daniel: School of Psychoeducation, University of Montreal, Montreal, PQ, Canada Parent, Sophie: School of Psychoeducation, University of Montreal, Montreal, PQ, Canada Vitaro, Frank: School of Psychoeducation, University of Montreal, Montreal, PQ, Canada Pihl, Robert O.: Department of Psychology, McGill University, Montreal, PQ, Canada Seguin, Jean R.: Department of Psychiatry, University of Montreal, Montreal, PQ, Canada

ER -

TY - JOUR

ID - 1320

T1 - Rough-and-tumble play and the development of externalizing behaviour

A1 - Flanders, Joseph L.

Y1 - 2011///

N1 - Dissertation Abstract: 2011-99120-288

English

Dissertation Abstract

KW - PsycInfo

KW - Rough and Tumble

KW - Behavior Change

KW - Externalization

KW - Recreation

KW - Self Regulation

RP - NOT IN FILE

SP - 7760

JF - Dissertation Abstracts International: Section B: The Sciences and Engineering

VL - .71

IS - 12-B

N2 - Longitudinal research on externalizing disorders has demonstrated that the signs of this form of psychopathology emerge early in life. For example, physically aggressive behaviours can be first observed as early as 18 months of age. Most preschool-aged children develop the self-regulatory abilities to inhibit these problem behaviours and express their aggressive and competitive impulses in alternative, constructive ways. Some children do not develop these abilities and chronic psychosocial difficulties typically result. Several researchers have raised the possibility that Parent-child rough-and-tumble play (RTP) interactions give parents and children an opportunity to develop the child's self-regulatory abilities. Defined here as aggressive behaviours in a play context, RTP often challenges children to modulate their behaviour to ensure their play partner continues to enjoy the activity. In the work that follows, the hypothesis that parent-child RTP can influence the development of behaviour self-regulation is tested. The first study reported here shows that the frequency of mother-child RTP in the preschool is negatively associated with physical aggression later in development, though this effect depends on the presence of a father figure in the home. The second study validates the Rough-and-Tumble Play Scales (RTPS), designed to facilitate the study of RTP and the development of self-regulation. The third study uses observational techniques to highlight the importance of a dominant father in play interactions. RTP frequency was negatively associated levels of physical aggression in dyads in which the father was relatively more dominant. The reverse was true for dyads in which the father was relatively less dominant. Finally, the fourth study showed that this interaction between father-child RTP frequency and father dominance also predict several other aspects of self-regulatory functioning 5 years later. RTP is a highly common, natural, and enjoyable activity for many parents and their children. Collectively, these studies also suggest that under the right conditions, parent-child RTP can influence the development of a child's self-regulatory abilities. While further research is needed, these results hold promise for the development of new interventions for children at risk for externalizing problems and their parents. (PsycINFO Database Record (c) 2012 APA, all rights reserved)

SN - 0419-4217

AD - Flanders, Joseph L.: McGill U., Canada

ER -

TY - JOUR

ID - 1321

T1 - Rough and tumble play quality: Theoretical foundations for a new measure of father-child interaction.

[References]

A1 - Fletcher, Richard; StGeorge, Jennifer; Freeman, Emily

Y1 - 2013///

N1 - Peer Reviewed Journal: 2013-18617-002

English

Journal; Peer Reviewed Journal

KW - PsycInfo

KW - Rough and Tumble

KW - Childhood Development

KW - Childhood Play Behavior

KW - Father Child Relations

KW - Cognitive Processes

KW - Father Child Communication

KW - Social Processes

RP - NOT IN FILE

SP - Jun

EP - 759

JF - Early Child Development and Care

VL - .183

IS - 6

N2 - Energetic, competitive, body-contact play (rough and tumble play (RTP)) is commonly observed among young children and is reported as an important feature of father-child relationships. Animal studies have demonstrated positive developmental effects of peer-peer play-wrestling, influencing cognitive and social outcomes. The purpose of this paper is to discuss the nature of RTP between father and child and its relationship to child development and to describe a theoretically informed measure of the quality of father-child RTP.

(PsycINFO Database Record (c) 2013 APA, all rights reserved) (journal abstract)

SN - 0300-4430

AD - Fletcher, Richard: Family Action Centre, Faculty of Health, University of Newcastle, Callaghan, NSW, Australia StGeorge, Jennifer: Family Action Centre, Faculty of Health, University of Newcastle, Callaghan, NSW, Australia Freeman, Emily: Family Action Centre, Faculty of Health, University of Newcastle, Callaghan, NSW, Australia

ER -

TY - JOUR

ID - 1322

T1 - The rough and tumble life

A1 - Freeman,J.W.

Y1 - 2005/08//

N1 - Freeman, Jerome W

South Dakota journal of medicine

ujz, 0040162

IM

Editorial

English

KW - Medline

KW - Rough and Tumble

KW - Dissent and Disputes

KW - Humans

KW - Physician-Patient Relations

KW - Professional-Family Relations

RP - NOT IN FILE

SP - 307

EP - 308

JF - South Dakota Journal of Medicine

JA - S.D J Med

VL - 58

IS - 8

CY - United States

SN - 0038-3317

UR - 16425932

ER -

TY - JOUR

ID - 1323

T1 - Biology and the oedipus complex

A1 - Friedman,R.C.

A1 - Downey,J.I.

Y1 - 1995/04//



N1 - Friedman, R C. Downey, J I

The Psychoanalytic quarterly

qd5, 0226661

IM

Journal Article

English

KW - Medline

KW - Rough and Tumble

KW - Aggression/ph [Physiology]

KW - Animals

KW - Brain/ph [Physiology]

KW - Child

KW - Drive

KW - Female

KW - Freudian Theory

KW - Gender Identity

KW - Humans

KW - Instinct

KW - Male

KW - Oedipus Complex

KW - Play and Playthings

KW - Psychosexual Development/ph [Physiology]

KW - Testosterone/ph [Physiology]

RP - NOT IN FILE

SP - 234

EP - 264

JF - Psychoanalytic Quarterly

JA - Psychoanal.Q

VL - 64

IS - 2

CY - UNITED STATES

N2 - Recent observations in the behavioral and neurosciences have raised questions about the ubiquity of the oedipus complex as well as about its significance for psychological development. The authors argue that the construct Freud called the oedipus complex in males is best examined in its component parts. One component--the incestuous wish--does not occur in all individuals. Another component--the boy's urge to engage competitively with other male figures, including the father--does appear to be biologically based in testosterone's effect on the brain and to be manifested in childhood rough and tumble play behavior. It is proposed that reexamination of the oedipus complex in light of recent findings about the brain and behavior is indicated and that play, in particular, can usefully be considered as a separate developmental line

SN - 0033-2828

UR - 7652101

ER -

TY - JOUR

ID - 1324

T1 - Sexual differentiation of childhood play: a contemporary psychoanalytic perspective

A1 - Friedman,R.C.

A1 - Downey,J.I.

Y1 - 2014/01//

N1 - Friedman, Richard C. Downey, Jennifer I

Archives of sexual behavior

8gr, 1273516

IM

Journal Article

English

KW - Medline

KW - Rough and Tumble

RP - NOT IN FILE

SP - 197

EP - 211

JF - Archives of Sexual Behavior

JA - Arch.Sex Behav

VL - 43

IS - 1

CY - United States

N2 - Freud (1905/1953) anchored his theories of unconscious psychological functioning in observations and inferences about childhood sexuality. These ideas remain influential among psychoanalysts today. Much progress subsequently occurred in extra-psychoanalytic research in human sexuality. This included the discovery in 1959 of an entirely new area of psychology: the sexual differentiation of behavior (Phoenix, Goy, Gerall, & Young, 1959; Wallen, 2009). The observations that led to this new field originally concerned the effects of androgen administered prenatally to non-human animals. This early research was compatible with later studies of humans as well. Prenatal androgen influences both erotic and non-erotic behavior, including childhood rough-and-tumble play (RTP). We have previously emphasized the need to integrate this psychoneuroendocrine knowledge with psychoanalytic theory and practice (Friedman, 1988; Friedman & Downey, 2002, 2008a, 2008b). In this article, we discuss additional aspects of the relationship between sexually differentiated childhood play, particularly RTP, and gender differences in psychosexual development and functioning. These topics and other aspects of the sexual differentiation of behavior have been under-emphasized in psychoanalytic thought

SN - 1573-2800

AD - Department of Psychiatry, Cornell/Weill Medical College, New York, NY, USA, rcf2@columbia.edu

UR - 24366660

ER -

TY - JOUR

ID - 1325

T1 - Review of The role of play in human development

A1 - Galloway,David

Y1 - 2011///

N1 - Peer Reviewed Journal: 2011-01061-014

English

Journal; Peer Reviewed Journal

KW - PsycInfo

KW - Rough and Tumble

KW - Behavior Problems

KW - Childhood Play Behavior

KW - Human Development

KW - Learning

KW - Childhood Development

RP - NOT IN FILE

SP - Feb

JF - Child and Adolescent Mental Health

VL - .16

IS - 1

N2 - Reviews the book, The role of play in human development by A. D. Pellegrini (see record 2009-12009-000). Children's play, this book makes clear, can be a serious matter. Views are polarized between disciples who believe that all play is always good for all children, and target-driven practitioners who regard it as a distraction from achieving all-important learning outcomes. Pellegrini defines play as meeting two criteria: first, the means are more important than the ends; second, the orientation is non-functional, as in rough-and-tumble play, where there is no intention to hurt each other, although some aspects resemble genuine fighting. The discussion on the role of play in education should interest teachers who pick up the pieces after children have experienced failure and/or presented significant behavior problems at school. The author draws from a variety of disciplines in submitting theory, rhetoric and ideology to the test of empirical research. The book is well produced, referenced

and indexed and will be essential reading for researchers and practitioners with a particular interest in play, but the wealth of detail may make it less accessible to non-specialists. (PsycINFO Database Record (c) 2012 APA, all rights reserved)

SN - 1475-357X

AD - Galloway, David: School of Education, Durham University, Durham, United Kingdom

ER -

TY - JOUR

ID - 1326

T1 - "You got to have a heart of stone to work here": Coaching, teaching, and "building men" at Eastside High

A1 - Gilmer, Micah

Y1 - 2009///

N1 - Dissertation Abstract: 2009-99171-072

English

Dissertation Abstract

KW - PsycInfo

KW - Rough and Tumble

KW - Blacks

KW - Coaches

KW - Social Sciences

KW - Teaching

KW - Teaching Methods

KW - Coaching

RP - NOT IN FILE

SP - 924

JF - Dissertation Abstracts International Section A: Humanities and Social Sciences

VL - .70

IS - 3-A

N2 - This dissertation is the first study of this length to examine the ways adult African American men build community. It is also a new attempt to describe the pedagogical approaches these men use as educators, and to theorize how their life experiences and personal style impact their work in the classroom. The study centers on a group of African American football coaches, and expands from that critical site to the personal and professional lives of the educators on that staff. Though Black men are often assumed to be emotionally inexpressive, I find that the coaches I work with expressed their most intimate emotion to select groups of trusted partners. These individuals actively built communities of love and support through processes of racial vetting and personal character evaluation, and took extended periods of time to develop close friendships. After reviewing the ways in which the social sciences have generally regarded Black males with varying degrees of contempt, fear and pity, I examine the ways the game of football and the "consensual violence" the football community fostered help build, rather than deconstruct, personal bonds. I use examples of roughhousing and interpersonal confrontation as ways to talk about how, contrary to much of the scholarship on violence in sports, aggression can lead to intimacy. In similar fashion, the coach-educators of Eastside High approached teaching as an exercise underpinned by a need to be brutally honest, or "real," with their "kids." I found that these coaches were critical of their colleagues that insisted upon anything but honesty with students, and championed realistic expectations for students as a key to effective pedagogy. These educators also articulated the importance of engaging students from a communal perspective, particularly in an educational environment that at times can be openly hostile to "at risk" students. While these teachers and staff were often critical of youth culture in very specific ways, they also tried to create spaces for their students to express themselves, even in counter-cultural ways. Lastly, the coaches of Eastside High postulated teacher burnout as a pressing issue that should be at the center of considerations for educational reform. They argued that the testing regime had reduced their work as teachers to a numbers game, and insisted that the support of teachers should be central to systemic reform.

(PsycINFO Database Record (c) 2012 APA, all rights reserved)

SN - 0419-4209

AD - Gilmer, Micah: Duke U., US

ER -

TY - JOUR

ID - 1327

T1 - Social influence on the display of sexually dimorphic behavior in rhesus monkeys: isosexual rearing

A1 - Goldfoot,D.A.

A1 - Wallen,K.

A1 - Neff,D.A.

A1 - McBair,M.C.

A1 - Goy,R.W.

Y1 - 1984/10//

N1 - Goldfoot, D A. Wallen, K. Neff, D A. McBair, M C. Goy, R W

Archives of sexual behavior

8gr, 1273516

IM

Journal Article. Research Support, U.S. Gov't, P.H.S.

English

KW - Medline

KW - Rough and Tumble

KW - Animals

KW - Female

KW - Gender Identity

KW - Humans

KW - Macaca mulatta

KW - Male

KW - Peer Group

KW - Play and Playthings

KW - Sex Factors

KW - Sexual Behavior

KW - Animal

KW - Social Dominance

KW - Social Environment

KW - Weaning

RP - NOT IN FILE

SP - 395

EP - 412

JF - Archives of Sexual Behavior

JA - Arch.Sex Behav

VL - 13

IS - 5

CY - UNITED STATES

N2 - Groups containing 5 or 6 infant rhesus monkeys and their mothers were formed when the infants were approximately 3 months old by random assignment from an available pool. There were 33 males and 38 females assigned to groups containing infants of both sexes (heterosexual groups); 15 males and 15 females were assigned to groups containing only infants of the same sex (isosexual groups). The social behavior of subjects in each group was observed and recorded during six 50-day periods from 3 months of age to 3 1/2 years of age. Two sexually dimorphic patterns, mounting and presenting, were recorded for each subject as indices of protosexual (i.e., patterns eventually used in adult mating behavior) development. In addition, rough play, a dimorphic response that is not protosexual, was also recorded. Both males and females in the isosexual condition were characterized by a partial inversion of the manifestation of protosexual behavior. Isosexual males showed statistically less foot-clasp mounting and more presenting than heterosexual males. Conversely, isosexually reared females showed statistically more mounting and less presenting than heterosexual females. The effect of rearing animals in same-sex groups was greater on heterotypical than on homotypical protosexual behavior. Among isosexual males, presenting responses deviated from the heterosexual male standard to a greater extent than did mounting. Among isosexual females, mounting behavior deviated from the heterosexual female standard more than presenting. Results suggested that presenting behavior by males was more easily augmented by isosexual rearing conditions than was mounting by females. At no time during the experiments did isosexual females mount at frequencies or at group proportions that were indistinguishable from those of heterosexually reared males. In contrast, males reared isosexually showed average frequencies of presenting that

equaled or exceeded means for females reared heterosexually. While mounting and presenting were both modified by same-sex rearing, rough-and-tumble-play frequencies were not influenced markedly in either sex. However, isosexual males did show statistically higher frequencies of rough play than heterosexual males during the final period of observation (3 to 3 1/2 years of age), and isosexual females showed less rough play than heterosexually reared females during the first year of life. Results support the conclusion that isosexual conditions can have a selective effect on the developmental expression of protosexual responses without altering the probability of display of other sexually dimorphic social behavior.(ABSTRACT TRUNCATED AT 400 WORDS)

SN - 0004-0002

UR - 6542772

ER -

TY - JOUR

ID - 1328

T1 - Methylphenidate and play skills in children with intellectual disability and ADHD. [References]

A1 - Handen, Benjamin L.

Y1 - 2009///

N1 - Peer Reviewed Journal: 2009-06362-001

English

Journal; Peer Reviewed Journal

KW - PsycInfo

KW - Rough and Tumble

KW - Attention Deficit Disorder with Hyperactivity

KW - Childhood Play Behavior

KW - Cognitive Impairment

KW - Drug Therapy

KW - Methylphenidate

KW - Comorbidity

KW - Side Effects (Drug)

KW - Social Behavior

RP - NOT IN FILE

SP - Jan

EP - Mar

JF - Journal of Mental Health Research in Intellectual Disabilities

VL - .2

IS - 1

N2 - Attention-deficit/hyperactivity disorder (ADHD) affects 9-12% of individuals with intellectual disability (ID). Although psychostimulant medication is often the primary treatment modality, little is known regarding the effects of such agents on social interactions and play in this population. Additionally, the role of ADHD symptoms in social and play deficits (beyond that accounted for by ID alone) is not well understood. The first aim of this study was to examine differences in play skills between children with ADHD and ID and non-ADHD/ID controls. The second aim was to determine what, if any, changes in social/play behavior would occur with the use of the stimulant, methylphenidate, among the participants with ADHD/ID. It was hypothesized that the ADHD/ID group would display significantly greater activity level, "rough" play, and more aggression than matched controls. Additionally, it was hypothesized that these deficits would evidence statistically significant improvement with pharmacologic treatment. This study replicates prior work conducted by the authors.

(PsycINFO Database Record (c) 2012 APA, all rights reserved) (journal abstract)

SN - 1931-5864

AD - Handen, Benjamin L.: Department of Psychiatry, University of Pittsburgh School of Medicine, Pittsburgh, PA, US Sagady, Amie E.: School of Public Health, University of Pittsburgh, Pittsburgh, PA, US McAuliffe-Bellin, Sarah: University of Pittsburgh Medical Center, Western Psychiatric Institute and Clinic, Pittsburgh, PA, US

ER -

TY - JOUR

ID - 1329

T1 - Physical play with boys of all ages. [References]

A1 - Harvey, Steve

Y1 - 2011///

N1 - Book: 2010-25612-004

English

Book; Edited Book

KW - PsycInfo

KW - Rough and Tumble

KW - Childhood Play Behavior

KW - Childhood Play Development

KW - Mental Health

KW - Physical Activity

KW - Psychotherapy

KW - Adolescent Development

KW - Childhood Development

KW - Father Child Relations

KW - Human Males

KW - Intervention

KW - Sons

RP - NOT IN FILE

SP - 324

JF - Haen, Craig [Ed]

IS - 2011

N2 - (from the chapter) This chapter will present how physically oriented play experiences can be incorporated into mental health intervention with boys to help increase their active participation. Developmental adaptations for boys from infancy through adolescence will be presented. Of special importance, the engagement of fathers in their son's play, when possible, will be discussed. Physical play is related to the natural rough and tumble play intrinsic to boys' experience growing up, especially with their fathers and brothers. Unfortunately, such full-body, physically interactive play is often overlooked in approaches to psychotherapy, including play therapy, with boys and their families. This chapter is meant to address this oversight. Some of the few approaches that use physical action will be presented as a way to describe elements that contribute to a positive outcome in interventions with boys. (PsycINFO Database Record (c) 2012 APA, all rights reserved)

AD - Harvey, Steve: Child and Adolescent Mental Health Service, New Plymouth, New Zealand

ER -

TY - JOUR

ID - 1330

T1 - Sex differences in rhesus monkey toy preferences parallel those of children

A1 - Hassett, J.M.

A1 - Siebert, E.R.

A1 - Wallen, K.

Y1 - 2008/08//

N1 - Hassett, Janice M. Siebert, Erin R. Wallen, Kim

Hormones and behavior

gb7, 0217764

IM

Journal Article. Research Support, N.I.H., Extramural. Research Support, Non-U.S. Gov't. Research Support, U.S. Gov't, Non-P.H.S.

English

KW - Medline

KW - Rough and Tumble

KW - Animals

KW - Brain/ph [Physiology]

KW - Child

KW - Choice Behavior/ph [Physiology]

KW - Depth Perception/ph [Physiology]

KW - Female  
 KW - Gonadal Steroid Hormones/ph [Physiology]  
 KW - Hierarchy  
 KW - Social  
 KW - Humans  
 KW - Macaca mulatta/ph [Physiology]  
 KW - Macaca mulatta/px [Psychology]  
 KW - Male  
 KW - Motor Activity/ph [Physiology]  
 KW - Orientation/ph [Physiology]  
 KW - Play and Playthings  
 KW - Pregnancy  
 KW - Prenatal Exposure Delayed Effects  
 KW - Psychomotor Performance/ph [Physiology]  
 KW - Sex Characteristics  
 KW - SOCIALIZATION  
 RP - NOT IN FILE  
 SP - 359  
 EP - 364  
 JF - Hormones & Behavior  
 JA - Horm.Behav  
 VL - 54  
 IS - 3  
 CY - United States

N2 - Sex differences in toy preferences in children are marked, with boys expressing stronger and more rigid toy preferences than girls, whose preferences are more flexible. Socialization processes, parents, or peers encouraging play with gender-specific toys are thought to be the primary force shaping sex differences in toy preference. A contrast in view is that toy preferences reflect biologically-determined preferences for specific activities facilitated by specific toys. Sex differences in juvenile activities, such as rough-and-tumble play, peer preferences, and infant interest, share similarities in humans and monkeys. Thus if activity preferences shape toy preferences, male and female monkeys may show toy preferences similar to those seen in boys and girls. We compared the interactions of 34 rhesus monkeys, living within a 135 monkey troop, with human wheeled toys and plush toys. Male monkeys, like boys, showed consistent and strong preferences for wheeled toys, while female monkeys, like girls, showed greater variability in preferences. Thus, the magnitude of preference for wheeled over plush toys differed significantly between males and females. The similarities to human findings demonstrate that such preferences can develop without explicit gendered socialization. We offer the hypothesis that toy preferences reflect hormonally influenced behavioral and cognitive biases which are sculpted by social processes into the sex differences seen in monkeys and humans

SN - 1095-6867

AD - Department of Psychology, Emory University, Atlanta, GA 30322, USA

UR - 18452921

ER -

TY - JOUR

ID - 1331

T1 - Who can do it? New science teachers with reform-based teaching strategies

A1 - Hick, Sarah Rachel

Y1 - 2009///

N1 - Dissertation Abstract: 2009-99050-192

English

Dissertation Abstract

KW - PsycInfo

KW - Rough and Tumble

KW - Educational Reform

KW - Science Education

KW - Sciences

KW - Teachers

KW - Strategies

KW - Teaching

RP - NOT IN FILE

SP - 3436

JF - Dissertation Abstracts International Section A: Humanities and Social Sciences

VL - .69

IS - 9-A

N2 - Despite consistent calls for pedagogical changes in the teaching of science since the 1989 publication of *Science for All Americans* (Rutherford & Ahlgren), most science teachers still teach in traditional ways. This is most surprisingly true even for new science teachers whose teacher education programs have emphasized reform-based instruction. In order to understand how reform-based teaching can be done by new teachers, I examined the experiences and beliefs of three reform-based new secondary science teachers. Research in teacher socialization has shown that three separate phases—"life history," teacher education, and in-service—shape a teacher's beliefs and practices. Findings from this collective case study suggest that the ability to teach in reform-based ways in the "rough and tumble of practice" (Crawford, 2007) may be linked to a teacher having a "belief in" reform rather than a "knowledge of" reform. Findings from this study also provides evidence of teachers relying on their own learning style as a guide for teaching; drawing on authentic inquiry experiences in their instruction and their conceptions of the nature of science; and benefiting from having digital forms of lessons available, regardless of level of reform, to use as a springboard to crafting reform-based lessons. A possible link is explored between a disposition towards stewardship of the environment and disposition towards stewardship of children as learners. Recommendations are made for research, teacher education, and teacher in-service with regards to selection, preparation, and in-service support of new science teachers who can teach in reform-based ways. (PsycINFO Database Record (c) 2012 APA, all rights reserved)

SN - 0419-4209

AD - Hick, Sarah Rachel: U Minnesota, US

ER -

TY - JOUR

ID - 1332

T1 - Androgen and the development of human sex-typical behavior: rough-and-tumble play and sex of preferred playmates in children with congenital adrenal hyperplasia (CAH)

A1 - Hines,M.

A1 - Kaufman,F.R.

Y1 - 1994/08//

N1 - Hines, M. Kaufman, F R

Child development

0372725, d28

IM

Comparative Study. Journal Article. Research Support, U.S. Gov't, P.H.S.

English

KW - Medline

KW - Rough and Tumble

KW - Adrenal Hyperplasia

KW - Congenital/bl [Blood]

KW - Congenital/px [Psychology]

KW - Aggression

KW - Androgens/ph [Physiology]

KW - Case-Control Studies

KW - Child

KW - Child Behavior

KW - Child Development

KW - Preschool

KW - Choice Behavior

KW - Female

KW - Gender Identity



KW - Humans  
KW - Interpersonal Relations  
KW - Male  
KW - Play and Playthings  
KW - Psychosexual Development  
KW - Sex Characteristics  
KW - Videotape Recording  
RP - NOT IN FILE  
SP - 1042  
EP - 1053  
JF - Child Development  
JA - Child Dev.  
VL - 65  
IS - 4  
CY - UNITED STATES

N2 - We hypothesized that girls with congenital adrenal hyperplasia (CAH), who experience higher than normal levels of androgens prenatally, would show masculinization of behaviors that show sex differences. Therefore, we examined rough-and-tumble play and sex of preferred playmates in 3-8-year-old children with CAH and in unaffected 3-8-year-old male and female relatives. The hypothesized sex differences in rough-and-tumble play were seen, with unaffected boys showing more rough-and-tumble play than unaffected girls. However, CAH girls were similar to unaffected girls. Additionally, CAH boys showed reduced rough-and-tumble play. In contrast, sex of preferred playmates showed the hypothesized pattern of results. There were sex differences, with unaffected boys preferring boys and unaffected girls preferring girls. In addition, the preferences of girls with CAH were masculinized compared to those of unaffected girls. Results are discussed in terms of possible influences of social, hormonal, and illness factors

SN - 0009-3920

AD - Department of Psychiatry and Biobehavioral Sciences, University of California, Los Angeles, School of Medicine 90024-1759

UR - 7956464

ER -

TY - JOUR

ID - 1333

T1 - Peer interaction patterns among adolescents with autistic spectrum disorders (ASDs) in mainstream school settings

A1 - Humphrey,N.

A1 - Symes,W.

Y1 - 2011/07//

N1 - Humphrey, Neil. Symes, Wendy

Autism : the international journal of research and practice

9713494

IM

Journal Article

English

KW - Medline

KW - Rough and Tumble

KW - Adolescent

KW - Adolescent Behavior/px [Psychology]

KW - Analysis of Variance

KW - Case-Control Studies

KW - Child

KW - Child Development Disorders

KW - Pervasive/px [Psychology]

KW - Dyslexia/px [Psychology]

KW - Female

KW - Humans

KW - Interpersonal Relations

KW - Male

KW - Peer Group

KW - Schools

KW - Social Behavior

RP - NOT IN FILE

SP - 397

EP - 419

JF - Autism

VL - 15

IS - 4

CY - England

N2 - The aim of the current study was to document the peer interaction patterns of students with autistic spectrum disorders in mainstream settings. Structured observations of a group of 38 adolescents with ASD drawn from 12 mainstream secondary schools were conducted over a two-day period and data compared with those of school, age, and gender matched comparison groups of 35 adolescents with dyslexia and 38 with no identified special educational needs (the ASD and dyslexia groups were also matched on SEN provision). Frequency and duration of peer interaction behaviours were coded. In terms of duration, multivariate analyses of variance (MANOVAs) indicated that participants with ASD spent more time engaged in solitary behaviours, less time engaged in co-operative interaction with peers, and more time engaging in reactive aggression towards peers than either comparison group. In terms of frequency, similar patterns emerged, but additionally participants with ASD engaged in fewer instances of rough/vigorous play, and were subject to more instances of social initiation and instrumental verbal aggression by peers than either comparison group. The findings of the current study support the authors' theoretical model of peer group interaction processes for individuals with ASD, and have implications for both social skills training and the development of peer awareness and sensitivity. Limitations are noted

SN - 1461-7005

AD - School of Education, University of Manchester, Manchester, UK. neil.humphrey@manchester.ac.uk

UR - 21454385

ER -

TY - JOUR

ID - 1334

T1 - "Real Men Are Tough Guys": Hegemonic Masculinity and Safety in the Construction Industry.

[References]

A1 - Iacuone, David

Y1 - 2005///

N1 - Peer Reviewed Journal: 2005-03171-006

English

Journal; Peer Reviewed Journal

KW - PsycInfo

KW - Rough and Tumble

KW - Business

KW - Health

KW - Masculinity

KW - Occupational Safety

KW - Alcohol Abuse

RP - NOT IN FILE

SP - Win

EP - 266

JF - The Journal of Men's Studies

VL - .13

IS - 2

N2 - Drawing on participant-observation research and 20 interviews with tradesmen, this article explores the link between masculinity and occupational health and safety (OH&S) in the Australian (state of Victoria) construction industry. The main contention of the article is that the hegemonic masculine construct most

commonly found on building sites serves to create a gender hierarchy, and this informal power matrix influences builders' perceptions of OH&S. Within this context, the article examines a range of topics including horseplay, alcohol consumption, the importance of risk and physical prowess, tradesmen's attitudes toward women, and one-upmanship. (PsycINFO Database Record (c) 2013 APA, all rights reserved) (journal abstract)  
SN - 1060-8265

AD - Iacuone, David: RMIT University, Melbourne, VIC, Australia

ER -

TY - JOUR

ID - 1335

T1 - "Rough and tumble" play: Lessons in life. [References]

A1 - Jarvis,Pam

Y1 - 2006///

N1 - Peer Reviewed Journal: 2008-06798-038

English

Journal; Peer Reviewed Journal

KW - PsycInfo

KW - Rough and Tumble

KW - Childhood Development

KW - Childhood Play Behavior

KW - Human Sex Differences

KW - Narratives

RP - NOT IN FILE

SP - 330

EP - 346

JA - Evolutionary Psychology

VL - .4 2006, pp. 330-346.

N2 - This paper focuses upon the developmental role of Rough and Tumble (R&T) play with particular attention to the narratives that children use to underpin such activities, and to gender differences within these. The empirical research focused upon the R&T play of children in the early years department of a suburban primary school in Northern England. The children's playtime activities were ethnographically observed over a period of eighteen calendar months, encompassing five school terms. The effects of evolution, biology and culture are recognized in the approach taken to the analysis of data. Findings indicated that the narratives underpinning R&T play were socially complex and highly gendered, and that mixed gender R&T play in particular could be theorized to mirror and simplify aspects of complex, gendered adult interaction. (PsycINFO Database Record (c) 2012 APA, all rights reserved) (journal abstract)

SN - 1474-7049

AD - Jarvis, Pam: Carnegie Faculty of Sports and Education, Carnegie Hall, Leeds Metropolitan University, Leeds, United Kingdom

ER -

TY - JOUR

ID - 1336

T1 - Monsters, magic and Mr Psycho: A biocultural approach to rough and tumble play in the early years of primary school. [References]

A1 - Jarvis,Pam

Y1 - 2007///

N1 - Peer Reviewed Journal: 2007-13989-007

English

Journal; Peer Reviewed Journal

KW - PsycInfo

KW - Rough and Tumble

KW - Childhood Development

KW - Childhood Play Behavior

KW - Elementary Schools

KW - Narratives

KW - Attention

KW - Interpersonal Communication

RP - NOT IN FILE

SP - Jul

EP - 188

JF - *Early Years: An International Journal of Research and Development*

VL - .27

IS - 2

N2 - This paper focuses upon the developmental role of rough and tumble (R&T) play with particular attention to the narratives that children use to underpin such activities. A review of the literature suggests that current early years research and practice pays scant attention to children's outdoor free play activities. A piece of original research is described in which playtime activities were ethnographically observed over an 18-month period. A biocultural approach was used in the analysis of data, in an attempt to encompass the roles of biology, evolution and culture in human development. Findings indicate that the narratives underpinning R&T play were socially complex and highly gendered, and it is suggested that much developmental learning may occur within such free play activities. (PsycINFO Database Record (c) 2012 APA, all rights reserved) (journal abstract)

SN - 0957-5146

AD - Jarvis, Pam: Bradford College, West Yorkshire, United Kingdom

ER -

TY - JOUR

ID - 1337

T1 - Dangerous activities within an invisible playground: A study of emergent male football play and teachers' perspectives of outdoor free play in the early years of primary school. [References]

A1 - Jarvis,Pam

Y1 - 2007///

N1 - Peer Reviewed Journal: 2007-12897-002

English

Journal; Peer Reviewed Journal

KW - PsycInfo

KW - Rough and Tumble

KW - Childhood Play Behavior

KW - Human Males

KW - Primary School Students

KW - Soccer

KW - Teacher Attitudes

RP - NOT IN FILE

SP - Oct

EP - 259

JA - *International Journal of Early Years Education*

VL - .15

IS - 3

N2 - This research was carried out during a study which focused upon the rough and tumble play of children in the early years department of a suburban primary school in northern England. The child sample's playtime activities were ethnographically observed over a period of 18 calendar months, during which time interviews were also carried out with the children's class teachers and several other adults taking part in the children's daily school routines. It was found that the narratives created by a cohort of four-and-a-half- to six-and-a-half-year-old boys around their football (soccer) play were socially and symbolically complex, providing evidence that such play is a highly valuable developmental activity. However, the interview data indicated that owing principally to very low adult:child ratios in playground supervision, the focus of the adults was strongly directed towards negative aspects of outdoor free play. (PsycINFO Database Record (c) 2012 APA, all rights reserved) (journal abstract)

SN - 0966-9760

AD - Jarvis, Pam: Bradford College, Bradford, WYK, United Kingdom

ER -

TY - JOUR  
ID - 1338  
T1 - Tracing the Milky Way's Rough-and-Tumble Youth  
A1 - Jayawardhana,R.  
Y1 - 1992/11/27/  
N1 - Jayawardhana, R  
Science (New York, N.Y.)  
0404511, uj7  
Journal Article  
English  
KW - Medline  
KW - Rough and Tumble  
RP - NOT IN FILE  
SP - 1439  
EP - 1440  
JF - Science  
VL - 258  
IS - 5087  
CY - United States  
SN - 0036-8075  
UR - 17755103  
ER -

TY - JOUR  
ID - 1339  
T1 - Children's play as a context for managing physiological arousal and learning emotion regulation.  
[References]  
A1 - LaFreniere,Peter  
Y1 - 2013///  
N1 - Peer Reviewed Journal: 2013-35574-002  
English  
Journal; Peer Reviewed Journal  
KW - PsycInfo  
KW - Rough and Tumble  
KW - Childhood Play Behavior  
KW - Emotional Regulation  
KW - Emotional States  
KW - Physiological Arousal  
KW - Age Differences  
KW - Aggressive Behavior  
KW - Human Sex Differences  
RP - NOT IN FILE  
SP - 2013, pp  
EP - 2013,204  
JF - Psihologijske Teme  
VL - .22  
IS - 2  
N2 - In this paper I examine children's play as a context for managing physiological arousal and learning to regulate strong emotions. I define emotion regulation as the process by which children monitor and control their emotional states and their expression to adapt to different social situations or demands. Age trends and gender differences in emotion regulation problems and competencies are described. I then review the development of play, deprivation studies, and the biological functions of different forms of play in primates before discussing children's play. Vigorous social play benefits children by promoting the development of communication, perspective-taking and emotion regulation skills. For boys especially, rough-and-tumble play in early childhood provides a scaffold for learning emotion regulation skills related to managing anger and aggression. (PsycINFO Database Record (c) 2013 APA, all rights reserved) (journal abstract)

SN - 1332-0742

AD - LaFreniere, Peter: Department of Psychology, University of Maine, Orono, ME, US

ER -

TY - JOUR

ID - 1340

T1 - Review of Brain Gender. [References]

A1 - Leckman, James F.

Y1 - 2005///

N1 - Peer Reviewed Journal: 2005-06749-024

English

Journal; Peer Reviewed Journal

KW - PsycInfo

KW - Rough and Tumble

KW - Brain

KW - Gender Identity

KW - Hormones

KW - Human Body

KW - Human Sex Differences

KW - Biology

KW - Mental Rotation

KW - Violent Crime

RP - NOT IN FILE

SP - Spr

EP - 636

JF - Journal of the American Psychoanalytic Association

JA - J Am Psychoanal. Assoc.

VL - .53

IS - 2

N2 - Reviews the book "Brain Gender" by Melissa Hines (2004). Hines displays an impressive expertise in the biological and behavioral determinants of sex differences. From the outset she reminds us that men are more likely than women to be incarcerated for violent crimes, to become university professors, to hold positions of political power, and to have above-average incomes. She also reviews a large body of scientific literature that indicates that the magnitude of sex differences is most marked for, in descending order, core gender identity, sexual orientation, height, mental rotation of three-dimensional objects (males are generally better at this task), toy preferences, physical aggression, and rough-and-tumble play as children. Fascinated by these differences, she retraces her interest in exploring the role that biological factors, particularly the gonadal hormones androgen and estrogen, play in brain development. In sum, Hines finds little evidence to support claims that hormonal differences can account for the numerical predominance of men in jails, politics, or the academy, or their relative absence in caretaking roles. (PsycINFO Database Record (c) 2012 APA, all rights reserved)

SN - 0003-0651

AD - Leckman, James F.: Yale University Child Study Center, New Haven, CT, US

ER -

TY - JOUR

ID - 1341

T1 - Survey of accidents in a university day-care center

A1 - Lee, E.J.

A1 - Bass, C.

Y1 - 1990/01//

N1 - Lee, E J. Bass, C

Journal of pediatric health care : official publication of National Association of Pediatric Nurse Associates & Practitioners

jml, 8709735

N

Journal Article

English

KW - Medline

KW - Rough and Tumble

KW - Accidents/sn [Statistics & Numerical Data]

KW - Child Day Care Centers

KW - Child

KW - Preschool

KW - Female

KW - Humans

KW - Male

KW - Nurse Practitioners

KW - United States

KW - Universities

RP - NOT IN FILE

SP - 18

EP - 23

JF - Journal of Pediatric Health Care

JA - J Pediatr Health Care

VL - 4

IS - 1

CY - UNITED STATES

N2 - Accident reporting provides useful data for the analysis of injuries in day-care centers. This article reports the results of a survey study conducted to analyze accidental injuries in a large university day-care center in Southern California. Data were collected from individual student accident report forms filed by the teachers for the 1987 calendar year. A total of 103 accident reports were analyzed. Fifty-seven children ranging in age from 6 months to 6 years were involved in 103 accidents. The results of the study revealed that the highest number of accidents occurred among children 3 and 4 years of age. The majority of the accidents occurred during horseplay or while the children were running or fighting. Although no deaths or permanent disability occurred, this number of accidents do warrant the need for safety education

SN - 0891-5245

UR - 2299555

ER -

TY - JOUR

ID - 1342

T1 - Psychoanalytic preventions/interventions and playing "rough-and-tumble" games: Alternatives to medical treatments of children suffering from ADHD. [References]

A1 - Leuzinger-Bohleber, Marianne

Y1 - 2010///

N1 - Peer Reviewed Journal: 2011-00086-007

English

Journal; Peer Reviewed Journal

KW - PsycInfo

KW - Rough and Tumble

KW - Attention Deficit Disorder with Hyperactivity

KW - Intervention

KW - Prevention

KW - Psychoanalysis

KW - Therapeutic Processes

RP - NOT IN FILE

SP - 2010, pp

EP - 2010,338

JF - International Journal of Applied Psychoanalytic Studies

VL - .7

IS - 4

N2 - Much more clinical and empirical research is needed on all aspects of this serious spectrum of Attention deficit/hyperactivity disorders (ADHD). Nevertheless, given the current state of affairs, we reach the following conclusion: taking into account neurobiological, (unconscious) biographical as well as societal factors, we are convinced that contemporary psychoanalysis-due to its richness of conceptualization and clinical experience-offers a unique perspective on the complexities of ADHD and thus provides a means to achieve adequate prevention in families as well as in public institutions. More than other psychotherapeutic approaches, psychoanalysis offers suitable "corrective" experiences in the therapeutic relationships with these children and thus the possibility to "correct" or at least mitigate the effects of failed early development. Psychoanalytic treatment should be considered one of the promising therapeutic choices for treating children with ADHD. (PsycINFO Database Record (c) 2013 APA, all rights reserved)

SN - 1742-3341

ER -

TY - JOUR

ID - 1343

T1 - Pretend and physical play: Links to preschoolers' affective social competence. [References]

A1 - Lindsey, Eric W.

Y1 - 2013//

N1 - Peer Reviewed Journal: 2013-29322-004

English

Journal; Peer Reviewed Journal

KW - PsycInfo

KW - Rough and Tumble

KW - Childhood Play Behavior

KW - Preschool Students

KW - Social Skills

KW - Childhood Development

KW - Emotionality (Personality)

RP - NOT IN FILE

SP - Jul

EP - 360

JF - Merrill-Palmer Quarterly

VL - .59

IS - 3

N2 - This study investigated different forms of pretend and physical play as predictors of preschool children's affective social competence (ASC). Data were collected from 122 preschool children (57 boys, 65 girls; 86 European American, 9 African American, 17 Hispanic, and 10 other ethnicity) over a 2-year period. Children participated in emotion knowledge interviews, mothers rated children's emotion regulation skill, and observations were conducted of children's emotional expressiveness with peers in both Years 1 and 2.

Naturalistic observations of children's peer play behavior were conducted to assess the proportion of time children spend in pretend and physical play in Year 1. Analyses revealed that sociodramatic play predicted children's emotional expressiveness, emotion knowledge, and emotion regulation 1 year later, after controlling for Year 1 ASC skills. Rough-and-tumble play predicted children's emotional expressiveness and emotion regulation 1 year later, whereas exercise play predicted only emotion regulation. Some associations between sociodramatic play and rough- and-tumble play and children's ASC were moderated by gender. (PsycINFO Database Record (c) 2013 APA, all rights reserved) (journal abstract)

SN - 0272-930X

AD - Lindsey, Eric W.: Penn State Berks, Reading, PA, US Colwell, Malinda J.: Texas Tech University, Lubbock, TX, US

ER -

TY - JOUR

ID - 1344

T1 - Preschool teachers' views of active play. [References]

A1 - Logue, Mary Ellin; Harvey, Hattie

Y1 - 2010//



N1 - Peer Reviewed Journal: 2010-11634-003

English

Journal; Peer Reviewed Journal

KW - PsycInfo

KW - Rough and Tumble

KW - Childhood Play Behavior

KW - Preschool Teachers

KW - Teacher Attitudes

KW - Human Sex Differences

RP - NOT IN FILE

SP - Jan

EP - 49

JF - Journal of Research in Childhood Education

VL - .24

IS - 1

N2 - This study surveyed 98 teachers of 4-year-olds about dramatic play in their classrooms and about their attitudes and practices about rough-and-tumble play. Gender differences emerged in the nature of dramatic play reported and in the ways in which teachers interacted with children engaged in different forms of dramatic play. Teachers also reported their coursework in early childhood education as the greatest influence on their beliefs and attitudes about rough-and-tumble play. The findings have implications for curriculum planning, school behavior policies, and teacher education programs. (PsycINFO Database Record (c) 2012 APA, all rights reserved) (journal abstract)

SN - 0256-8543

AD - Logue, Mary Ellin: University of Maine, Orono, ME, US Harvey, Hattie: University of Denver, Denver, CO, US

ER -

TY - JOUR

ID - 1345

T1 - "Rough and tumble" social interactions: An exploration of a new behavioral construct

A1 - Luckner, Amy Elizabeth

Y1 - 2008///

N1 - Dissertation Abstract: 2008-99020-379

English

Dissertation Abstract

KW - PsycInfo

KW - Rough and Tumble

KW - Constructivism

KW - Social Interaction

KW - Sociometric Tests

KW - Aggressive Behavior

KW - Antisocial Behavior

KW - Popularity

KW - Prosocial Behavior

RP - NOT IN FILE

SP - 4866

JF - Dissertation Abstracts International: Section B: The Sciences and Engineering

VL - .68

IS - 7-B

N2 - The purpose of this study was to investigate a new behavioral construct, "rough and tumble" social interactions, that encompasses behaviors that are superficially similar to relational aggression, but are playful in nature. This initial study examined the validity of the rough and tumble social interactions construct by investigating whether young adults differentiate between relational aggression and rough and tumble social interactions, and whether engagement in relational aggression and rough and tumble social interactions differentially predicts prosocial and antisocial behavior, and perceived and sociometric popularity. Participants, 144 sorority members and 109 fraternity members from a midwestern university, completed self-report and peer

nomination measures during one 30-45 minute session. Peer nominations of rough and tumble social interactions and relational aggression were moderately, positively correlated, demonstrating overlapping but distinct constructs. In addition, regression analyses revealed that after controlling for shared variance, peer nominations of relational aggression and rough and tumble social interactions differentially predicted prosocial behaviors, depression, and borderline features: relational aggression negatively predicted prosocial behavior and positively predicted depression and borderline features whereas rough and tumble social interactions positively predicted prosocial behavior, negatively predicted depression, and was not related to borderline features. Differential relations were also found for perceived and sociometric popularity. Relational aggression was negatively related to both variables whereas rough and tumble social interactions demonstrated positive relations. Overall, the results of this initial investigation suggest that rough and tumble social interactions is a valid construct, distinct from relational aggression, that provides unique information in the prediction of antisocial behaviors, prosocial behaviors, acceptance, and popularity. (PsycINFO Database Record (c) 2012 APA, all rights reserved)

SN - 0419-4217

AD - Luckner, Amy Elizabeth: U Minnesota, US

ER -

TY - JOUR

ID - 1346

T1 - Method for obtaining structure and interactions from oriented lipid bilayers

A1 - Lyatskaya, Y.

A1 - Liu, Y.

A1 - Tristram-Nagle, S.

A1 - Katsaras, J.

A1 - Nagle, J.F.

Y1 - 2001/01//

N1 - Lyatskaya, Y. Liu, Y. Tristram-Nagle, S. Katsaras, J. Nagle, J F

Physical review. E, Statistical, nonlinear, and soft matter physics

101136452

IM

Journal Article. Research Support, U.S. Gov't, Non-P.H.S.. Research Support, U.S. Gov't, P.H.S.

English

KW - Medline

KW - Rough and Tumble

KW - Lipid Bilayers/ch [Chemistry]

KW - Lipid Bilayers/me [Metabolism]

KW - Models

KW - Statistical

KW - Protein Structure

KW - Tertiary

KW - Scattering

KW - Radiation

KW - Thermodynamics

KW - X-Ray Diffraction/mt [Methods]

KW - X-Rays

RP - NOT IN FILE

SP - 011907

JF - Physical Review E

JA - Phys Rev E Stat.Nonlin.Soft.Matter Phys

VL - Statistical, Nonlinear, & Soft Matter Physics. 63

IS - 1 Pt 1

CY - United States

N2 - Precise calculations are made of the scattering intensity  $I(q)$  from an oriented stack of lipid bilayers using a realistic model of fluctuations. The quantities of interest include the bilayer bending modulus  $K_c$ , the interbilayer interaction modulus  $B$ , and bilayer structure through the form factor  $F(qz)$ . It is shown how  $K_c$  and  $B$  may be obtained from data at large  $q(z)$  where fluctuations dominate. Good estimates of  $F(qz)$  can be made

over wide ranges of  $q(z)$  by using  $I(q)$  in  $q$  regions away from the peaks and for  $q(r)$  not equal 0 where details of the scattering domains play little role. Rough estimates of domain sizes can also be made from smaller  $q(z)$  data. Results are presented for data taken on fully hydrated, oriented DOPC bilayers in the  $L(\alpha)$  phase. These results illustrate the advantages of oriented samples compared to powder samples

SN - 1539-3755

UR - 11304287

ER -

TY - JOUR

ID - 1347

T1 - Experienced and expected similarity to same-gender peers: Moving toward a comprehensive model of gender segregation. [References]

A1 - Martin,Carol Lynn; Fabes,Richard

Y1 - 2011///

N1 - Peer Reviewed Journal: 2011-16716-012

English

Journal; Peer Reviewed Journal

KW - PsycInfo

KW - Rough and Tumble

KW - Attitude Similarity

KW - Childhood Development

KW - Experiences (Events)

KW - Heuristics

KW - Human Sex Differences

KW - Peers

RP - NOT IN FILE

SP - Sep

EP - 434

JF - Sex Roles

VL - .65

IS - 5-6

N2 - Gender segregation is often explained by children being interested in interacting with other children who behave similarly to themselves. Children's beliefs about girls and boys (i.e., their gender cognitions) may also play a role in gender segregation, but this idea has received little attention. In this study, we proposed a model of gender segregation that included similarity on gender-typed behavioral qualities (e.g., rough and tumble play) and gender cognitions concerning perceived similarity to same-gender others, and we assessed whether this more comprehensive heuristic model predicted observed peer interactions in young U.S. children ( $n = 74$ ;  $M$  age = 51 m; middle-class families). A multi-method design was employed including observations of behavior and child reports of gender cognitions. Support was found for the linkages proposed in this comprehensive model for boys; partial support was found for girls. Specifically, the inclusion of gender cognitions was supported for both genders: gender cognitions about perceived similarity related to interactional partner choices for both girls and boys, and accounted for variance in observed partner choices even after behavioral similarity was included in the model. The traditional link concerning behavioral similarity on rough-and-tumble play predicted boys' but not girls' interactions. The findings extend knowledge about the role of social cognitions in social behavior, and are consistent with ideas proposed by gender schema theory and other constructivist theories. (PsycINFO Database Record (c) 2012 APA, all rights reserved) (journal abstract)

SN - 0360-0025

AD - Martin, Carol Lynn: School of Social and Family Dynamics, Arizona State University, Tempe, AZ, US

Fabes, Richard A.: School of Social and Family Dynamics, Arizona State University, Tempe, AZ, US Hanish,

Laura: School of Social and Family Dynamics, Arizona State University, Tempe, AZ, US Leonard, Stacie:

School of Social and Family Dynamics, Arizona State University, Tempe, AZ, US Dinella, Lisa M.: School of

Social and Family Dynamics, Arizona State University, Tempe, AZ, US

ER -

TY - JOUR

ID - 1348

T1 - Rough play: Pediatric concussions require early recognition & proper field treatment

A1 - Meredith,M.

Y1 - 1956/07//

N1 - Meredith, Mark

JEMS : a journal of emergency medical services

8102138, irc

H

Journal Article

English

KW - Medline

KW - Rough and Tumble

KW - Adolescent

KW - Athletic Injuries/di [Diagnosis]

KW - Athletic Injuries/th [Therapy]

KW - Brain Concussion/di [Diagnosis]

KW - Brain Concussion/th [Therapy]

KW - Child

KW - Emergency Medical Services

KW - Emergency Treatment/mt [Methods]

KW - Humans

RP - NOT IN FILE

SP - 52

EP - 54

JF - Journal of Emergency Medical Services

JA - J Emerg.Med Serv JEMS.

VL - 37

IS - 4

CY - United States

SN - 0197-2510

AD - Vanderbilt University Medical Center, USA. mark.meredith@vanderbilt.edu

UR - 22792623

ER -

TY - JOUR

ID - 1349

T1 - Is this the mob or healthcare? K.C. fraud has executives bemoaning prosecutors' rough-and-tumble tactics

A1 - Moore,J.D.,Jr.

Y1 - 1962/09/06/

N1 - Moore, J D Jr

Modern healthcare

nfa, 7801798

H

News

English

KW - Medline

KW - Rough and Tumble

KW - Aggression

KW - Criminal Law

KW - Fraud/lj [Legislation & Jurisprudence]

KW - Government Agencies/st [Standards]

KW - Humans

KW - Medicare/lj [Legislation & Jurisprudence]

KW - Missouri

KW - Social Justice

KW - United States

RP - NOT IN FILE

SP - 60

JF - Modern Healthcare

JA - Mod.Healthc.

VL - 29

IS - 25

CY - UNITED STATES

SN - 0160-7480

UR - 10538602

ER -

TY - JOUR

ID - 1350

T1 - [Inappropriately rough play behaviour and predatory attacks against people by a tomcat. A case report].

[German]

A1 - Morber,M.

A1 - Bartels,A.

A1 - Erhard,M.H.

Y1 - 2013//

N1 - Morber, M. Bartels, A. Erhard, M H

Tierärztliche Praxis. Ausgabe K, Kleintiere/Heimtiere

cye, 9717383

IM

English Abstract. Journal Article

German

KW - Medline

KW - Rough and Tumble

RP - NOT IN FILE

SP - 117

EP - 122

JF - Tierärztliche Praxis

JA - Tierärztl.Prax.Ausg K Klientiere.Heimtiere.

VL - Ausgabe K, Kleintiere/Heimtiere. 41

IS - 2

CY - Germany

N2 - The owner of a 6-months-old tomcat came to seek help because the cat had attacked her face on a near-daily basis. Through a detailed behavioural history, the cat's behaviour was diagnosed as human-directed predatory attack behaviour, play-related aggression and reduced motor as well as emotional self-control. Within a few weeks, behavioural therapy produced a significant improvement. After 5 months of therapy, the cat showed neither predatory attacks nor inappropriately rough or aggressive behaviour in play towards its owner or other humans

SN - 1434-1239

AD - Martina Morber, Tierärztliche Praxis, (Tatigkeitsschwerpunkt Verhaltenstherapie), Wendelsteinstrase 19, Erding. info@tier-verhalten-erding.de

UR - 23608967

ER -

TY - JOUR

ID - 1351

T1 - Detrusorectomy with Mitrofanoff stoma

A1 - Morecroft,J.A.

A1 - Searles,J.

A1 - MacKinnon,A.E.

Y1 - 1996/12//

N1 - Morecroft, J A. Searles, J. MacKinnon, A E

European journal of pediatric surgery : official journal of Austrian Association of Pediatric Surgery ... [et al] = Zeitschrift fur Kinderchirurgie

azo, 9105263

IM

Journal Article

English

KW - Medline

KW - Rough and Tumble

KW - Adolescent

KW - Appendix/su [Surgery]

KW - Child

KW - Preschool

KW - Female

KW - Follow-Up Studies

KW - Humans

KW - Ileum/su [Surgery]

KW - Male

KW - Postoperative Complications/pp [Physiopathology]

KW - Urinary Bladder/pp [Physiopathology]

KW - Urinary Bladder/su [Surgery]

KW - Urinary Bladder

KW - Neurogenic/pp [Physiopathology]

KW - Neurogenic/su [Surgery]

KW - Urinary Diversion/mt [Methods]

KW - Urodynamics/ph [Physiology]

RP - NOT IN FILE

SP - 30

EP - 31

JF - European Journal of Pediatric Surgery

JA - Eur.J Pediatr Surg.

VL - 6 Suppl 1

CY - GERMANY

N2 - The clinical and social benefits derived from bladder augmentation are well known. Most procedures involve the implantation of gastric or intestinal segments into the bladder. These have problems of the acid-haematuria syndrome, mucous production, urinary infection, stone formation and metabolic disturbances. Lang and colleagues presented their experiences in 1994 with detrusorectomy alone as an alternative procedure. We have performed detrusorectomy with Mitrofanoff stoma on 9 patients, protecting the denuded bladder mucosa with omentum. This represents 50% of the bladder reconstructions managed over an 18-month period. Follow-up urodynamics studies have demonstrated a compliant low-pressure system of good capacity in all but one case. Apart from this failure, all the rest are continent. One boy suffered a ruptured bladder due to rough play and another suffered excruciating bladder pain on drainage. He was managed by the instillation of bupivacaine (4 mg/kg) twice daily. Successful management of cases depends on intensive support of the outreach nursing service

SN - 0939-7248

AD - Department of Paediatric Surgery, Sheffield Children's Hospital, Western Bank, UK

UR - 9008817

ER -

TY - JOUR

ID - 1352

T1 - A novel NMDA receptor glycine-site partial agonist, GLYX-13, has therapeutic potential for the treatment of autism. [Review]

A1 - Moskal,J.R.

A1 - Burgdorf,J.

A1 - Kroes,R.A.

A1 - Brudzynski,S.M.

A1 - Panksepp,J.

Y1 - 2011/10//

N1 - Moskal, Joseph R. Burgdorf, Jeffrey. Kroes, Roger A. Brudzynski, Stefan M. Panksepp, Jaak  
Neuroscience and biobehavioral reviews  
oa7, 7806090

IM

Journal Article. Research Support, Non-U.S. Gov't. Review

English

KW - Medline

KW - Rough and Tumble

KW - Animals

KW - Autistic Disorder/dt [Drug Therapy]

KW - Autistic Disorder/ge [Genetics]

KW - Autistic Disorder/px [Psychology]

KW - Brain Chemistry/ge [Genetics]

KW - Brain Chemistry/ph [Physiology]

KW - Endorphins/ph [Physiology]

KW - Gene Expression/ph [Physiology]

KW - Humans

KW - Oligopeptides/tu [Therapeutic Use]

KW - Play and Playthings/px [Psychology]

KW - Rats

KW - Receptors

KW - Glycine/ag [Agonists]

KW - N-Methyl-D-Aspartate/ag [Agonists]

KW - Vocalization

KW - Animal/de [Drug Effects]

KW - Animal/ph [Physiology]

RP - NOT IN FILE

SP - 1982

EP - 1988

JF - Neuroscience & Biobehavioral Reviews

JA - Neurosci Biobehav.Rev

VL - 35

IS - 9

CY - United States

N2 - Deficits in social approach behavior, rough-and-tumble play, and speech abnormalities are core features of autism that can be modeled in laboratory rats. Human twin studies show that autism has a strong genetic component, and a recent review has identified 99 genes that are dysregulated in human autism. Bioinformatic analysis of these 99 genes identified the NMDA receptor complex as a significant interaction hub based on protein-protein interactions. The NMDA receptor glycine site partial agonist d-cycloserine has been shown to treat the core symptom of social withdrawal in autistic children. Here, we show that rats selectively bred for low rates of play-induced pro-social ultrasonic vocalizations (USVs) can be used to model certain core symptoms of autism. Low-line animals engage in less social contact time with conspecifics, show lower rates of play induced pro-social USVs, and show an increased proportion of non-frequency modulated (i.e. monotonous) ultrasonic vocalizations, compared to non-selectively bred random-line animals. Gene expression patterns in the low-line animals show significant enrichment in autism-associated genes and the NMDA receptor family was identified as a significant hub. Treatment of low-line animals with the NMDAR glycine site partial agonist GLYX-13 rescued the deficits in play-induced pro-social 50-kHz and reduced monotonous USVs. Thus, the NMDA receptor has been shown to play a functional role in autism, and GLYX-13 shows promise for the treatment of autism. We dedicate this paper to Ole Ivar Lovaas (May 8, 1927-August 2, 2010), a pioneer in the field of autism. Copyright 2011 Elsevier Ltd. All rights reserved

SN - 1873-7528

AD - Falk Center for Molecular Therapeutics, Department of Biomedical Engineering, Northwestern University, Evanston, IL 60201, USA. j-moskal@northwestern.edu

UR - 21718719

ER -

TY - JOUR

ID - 1353

T1 - Solitary-functional play and solitary-pretend play: Another look at the construct of solitary-active behavior using playground observations. [References]

A1 - Nelson,Larry J.

Y1 - 2008///

N1 - Peer Reviewed Journal: 2008-15016-005

English

Journal; Peer Reviewed Journal

KW - PsycInfo

KW - Rough and Tumble

KW - Childhood Play Behavior

KW - Playgrounds

KW - Pretend Play

KW - Social Adjustment

RP - NOT IN FILE

SP - Nov

EP - 831

JF - Social Development

VL - .17

IS - 4

N2 - Although the construct of solitary-active behavior calls for the aggregation of solitary-functional play and solitary-pretend play, there is little empirical support for combining them into one construct. Furthermore, little work has been done in early childhood to examine these behaviors on the playground. The purpose of this study was to observe children's behavior on the playground to explore whether solitary-functional and solitary-pretend behaviors are related to one another and to other indices of social adjustment/maladjustment. Examining a sample of 361 preschoolers, results revealed that (1) solitary-functional and solitary-pretend play were not related, (2) solitary-functional play was associated with solitary-passive and reticent behaviors, as well as less social play, co-operative rough and tumble play, sociable/friendliness, assertiveness, and lower peer acceptance, and (3) solitary-pretend play was linked to lower peer acceptance and more social maladjustment, including venting, reactive aggression (but not proactive aggression), active exclusion, victimization, and being distractible. (PsycINFO Database Record (c) 2012 APA, all rights reserved) (journal abstract)

SN - 0961-205X

AD - Nelson, Larry J.: Brigham Young University, Provo, UT, US Hart, Craig H.: Brigham Young University, Provo, UT, US Evans, Cortney A.: Brigham Young University, Provo, UT, US

ER -

TY - JOUR

ID - 1354

T1 - Sufficient space for playing? I. The importance of playing in therapy and why is it put less into practice? [Danish]. [References]

A1 - Ostberg,Marit Andersen

Y1 - 2010///

N1 - Peer Reviewed Journal: 2011-13335-003

Danish

Journal; Peer Reviewed Journal

KW - PsycInfo

KW - Rough and Tumble

KW - Play Therapy

KW - Psychoanalysis

KW - Social Issues

RP - NOT IN FILE

SP - Oct

EP - 229

JF - Matrix: Nordisk Tidsskrift for Psykoterapi

VL - .27



IS - 3

N2 - The author took Andreas into play-therapy because he wasn't managing to make friends. Winnicott's theories of potential space and playing as healing in itself, was helpful. It was essential to resist being drawn into the unconscious game of rejection that was central to his social problems. During the second year the therapy evolved into role-playing as well as rough-and-tumble play, and Andreas succeeded in actually playing with the therapist. Shortly after he managed to make friends. It is regrettable that play-therapy is on the wane, but hardly surprising, given many different factors, e.g. the reduced attention the technique receives in the specialisation program for therapists and the general marginalization of psychoanalysis. (PsycINFO Database Record (c) 2012 APA, all rights reserved) (journal abstract)

SN - 0109-646X

AD - Ostberg, Marit Andersen: Boerum BUP, Vestre Viken HF, Rud, Norway

ER -

TY - JOUR

ID - 1355

T1 - [Phenomenologic and functional variability of violence among children]. [German]

A1 - Oswald,H.

A1 - Krappmann,L.

Y1 - 2000/01//

N1 - Oswald, H. Krappmann, L

Praxis der Kinderpsychologie und Kinderpsychiatrie

6, 0404246

IM

English Abstract. Journal Article

German

KW - Medline

KW - Rough and Tumble

KW - Child

KW - Dominance-Subordination

KW - Female

KW - Humans

KW - Male

KW - Motivation

KW - Peer Group

KW - Schools

KW - Social Environment

KW - Violence/px [Psychology]

RP - NOT IN FILE

SP - 3

EP - 15

JF - Praxis der Kinderpsychologie und Kinderpsychiatrie

JA - Prax.Kinderpsychol.Kinderpsychiatr.

VL - 49

IS - 1

CY - GERMANY

N2 - Examination of ten-year old children's everyday interactions with peers observed in natural settings of a school demonstrates that violence was present in many situations of help, sanctions, and rough-and-tumble play. Thorough analysis reveals diverse functions of violence in children's interactions: affirmation of reciprocity and justice, experience of agency and control, preservation of territories against intruders, clear messages, compensations of lacking capacities, and defense of the self

SN - 0032-7034

AD - Institut fur Padagogik, Universitat Potsdam

UR - 10783655

ER -

TY - JOUR

ID - 1357

T1 - Fathers and development: New areas for exploration. [References]

A1 - Paquette, Daniel; Coyl-Shepherd, Diana

Y1 - 2013///

N1 - Peer Reviewed Journal: 2013-18617-001

English

Journal; Peer Reviewed Journal

KW - PsycInfo

KW - Rough and Tumble

KW - Childhood Development

KW - Father Child Relations

KW - Parenting Style

RP - NOT IN FILE

SP - Jun

EP - 745

JF - Early Child Development and Care

VL - .183

IS - 6

N2 - This special issue presents seven articles exploring new avenues that promise a better understanding of the impact of fathering on child development. Collectively, these papers add to the research literature by presenting work that (1) examines key features of father child rough-and-tumble play and associations with children's development; (2) examines the link between rough-and-tumble play and the father-child activation relationship; (3) examines father involvement using newly developed observational measures which appropriately capture the unique characteristics of father-child interactions, including activative fathering, and associations with children's social-emotional development; (4) examines links between mothers' and fathers' perceptions of parental accessibility, division of household duties, parental roles, and child social adjustment; (5) examines father school-related involvement predictors and outcomes, controlling for levels of mother involvement; (6) examines associations between father perceptions of couple relationship quality, co-parenting, and father involvement, controlling for mother involvement and perceptions; and (7) examines mothers' and fathers' values in relation to children's social competence. This collection of studies explores the impact of father involvement using contemporary theories which examine the differential roles of mothers and fathers and connections between mother and father involvement (e.g. activation relationship theory, family systems theory). The collection also includes studies that have measured father involvement with tools designed specifically to assess fathering, including observational measures of the quality of father-child interactions. (PsycINFO Database Record (c) 2013 APA, all rights reserved)

SN - 0300-4430

AD - Paquette, Daniel: School of Psychoeducation, University of Montreal, Montreal, PQ, Canada Coyl-Shepherd, Diana D.: California State University at Chico, Chico, CA, US Newland, Lisa A.: University of South Dakota, Vermillion, SD, US

ER -

TY - JOUR

ID - 1358

T1 - Editorial

A1 - Parker-Rees, Rod

Y1 - 2007///

N1 - Peer Reviewed Journal: 2007-13989-001

English

Journal; Peer Reviewed Journal

KW - PsycInfo

KW - Rough and Tumble

KW - Childhood Development

KW - Culture (Anthropological)

KW - Evaluation

KW - Social Learning

KW - Teacher Attitudes

KW - Initiative

KW - Teachers

RP - NOT IN FILE

SP - Jul

EP - 101

JF - Early Years: An International Journal of Research and Development

VL - .27

IS - 2

N2 - The six papers published in this issue share a focus on ways in which young children's learning can be understood in terms of a dialogue between the phenomenological richness of 'real-life' experiences and the more formal, organized meaning structures which shape cultural priorities and which are represented in curricular targets and goals. The first paper, presents an evaluation of an Australian initiative to develop parents' and teachers' understanding of the learning potential of everyday activities and routines. The second paper emphasizes children's social agency in the process of developing different kinds of literacy. The third paper, presents rich ethnographic data from observations of 'everyday' interactions between young children and their grandparents in East London. The last two papers in this issue challenge this sort of narrow view of children's learning from different perspectives. The final paper, argues that children's rough and tumble play deserves greater recognition as an important medium for social learning. (PsycINFO Database Record (c) 2012 APA, all rights reserved)

SN - 0957-5146

AD - Parker-Rees, Rod: University of Plymouth, Plymouth, United Kingdom

ER -

TY - JOUR

ID - 1359

T1 - Physical activity play: the nature and function of a neglected aspect of playing. [Review] [150 refs]

A1 - Pellegrini,A.D.

A1 - Smith,P.K.

Y1 - 1998/06//

N1 - Pellegrini, A D. Smith, P K

Child development

0372725, d28

IM

Journal Article. Research Support, Non-U.S. Gov't. Review

English

KW - Medline

KW - Rough and Tumble

KW - Adolescent

KW - Adult

KW - Child

KW - Child Development

KW - Preschool

KW - Exercise/px [Psychology]

KW - Exercise

KW - Female

KW - Humans

KW - Infant

KW - Male

KW - Motor Skills

KW - Physical Endurance

KW - Physical Fitness

KW - Play and Playthings

KW - Sex Factors

RP - NOT IN FILE

SP - 577

EP - 598

JF - Child Development

JA - Child Dev.

VL - 69

IS - 3

CY - UNITED STATES

N2 - In this review, we consider the nature and possible developmental functions of physical activity play, defined as a playful context combined with a dimension of physical vigor. We distinguish 3 kinds of physical activity play, with consecutive age peaks: rhythmic stereotypies peaking in infancy, exercise play peaking during the preschool years, and rough-and-tumble play peaking in middle childhood. Gender differences (greater prevalence in males) characterize the latter 2 forms. Function is considered in terms of beneficial immediate and deferred consequences in physical, cognitive, and social domains. Whereas most theories assume that children's play has deferred benefits, we suggest that forms of physical activity play serve primarily immediate developmental functions. Rhythmic stereotypies in infancy are hypothesized to improve control of specific motor patterns. Exercise play is hypothesized to function primarily for strength and endurance training; less clear evidence exists for possible benefits for fat reduction and thermoregulation. In addition, there may be cognitive benefits of exercise play that we hypothesize to be largely incidental to its playful or physical nature. Rough-and-tumble play has a distinctive social component; we hypothesize that it serves primarily dominance functions; evidence for benefits to fighting skills or to emotional coding are more equivocal. Further research is indicated, given the potentially important implications for children's education, health, and development.

[References: 150]

SN - 0009-3920

AD - Department of Educational Psychology, University of Minnesota, Minneapolis 55455, USA

UR - 9680672

ER -

TY - JOUR

ID - 1361

T1 - The Development and Function of Rough-and-Tumble Play in Childhood and Adolescence: A Sexual Selection Theory Perspective. [References]

A1 - Pellegrini, Anthony D.

Y1 - 2006///

N1 - Book: 2007-04529-004

English

Book; Edited Book

KW - PsycInfo

KW - Rough and Tumble

KW - Childhood Play Behavior

KW - Childhood Play Development

KW - Human Sex Differences

KW - Theories

KW - Animal Ethology

KW - Parental Investment

RP - NOT IN FILE

SP - sociocultural, and

EP - 98

JF - Goncu, Artin [Ed]; Gaskins, Suzanne [Ed]

IS - 2006

N2 - (from the chapter) In this chapter I integrate the ethological and developmental psychological play literatures. Indeed, such integration was called for explicitly by Piaget (1967): "There exists a parallelism, and a fairly close one, between biological doctrines of evolutionary variation and the particular theories of intelligence" (p. 11). To that end, I present a model for the development of rough-and-tumble play (R&T) utilizing both biological and developmental psychological principles. Specifically, I use sexual selection (Darwin, 1871) and parental investment theories (Trivers, 1972) as a way to explain the development and function of R&T during childhood and adolescence. I first define R&T. Next, I discuss basic tenets of sexual selection and parental investment theories and how these principles relate to gender differences in R&T. Third, I describe the context in which R&T develops by showing how sexually segregated peer groups in childhood is

the venue in which boys use highly vigorous and competitive forms of play. Fourth, I outline the development and functions of play during childhood and adolescence. As part of this discussion, I present two views of function (immediate and deferred benefits). I present cost-benefit analyses to argue that R&T probably serves an immediate function during childhood as well as an immediate function during adolescence. Specifically, during childhood R&T probably is used by boys as a way in which to affiliate with other boys and to condition cardiovascular and muscular systems. During adolescence, R&T continues to relate to boys' cardiovascular and muscular conditioning but also relates to dominance and aggression and is later used as a strategy to initiate heterosexual contact. (PsycINFO Database Record (c) 2012 APA, all rights reserved)

AD - Pellegrini, Anthony D.: Department of Educational Psychology, University of Minnesota-Twin Cities Campus, Minneapolis, MN, US

ER -

TY - JOUR

ID - 1362

T1 - The evolution of social play. [References]

A1 - Pellis, Sergio M.

Y1 - 2010///

N1 - Book: 2010-08663-030

English

Book; Edited Book

KW - PsycInfo

KW - Rough and Tumble

KW - Aggressive Behavior

KW - Animal Play

KW - Mammals

KW - Social Behavior

KW - Childhood Development

KW - Childhood Play Behavior

KW - Species Differences

KW - Theory of Evolution

RP - NOT IN FILE

SP - culture, and

EP - 431

JF - Worthman, Carol M [Ed]; Plotsky, Paul M [Ed]; Schechter, Daniel S [Ed]; Cummings, Constance A [Ed]

IS - 2010

N2 - (from the chapter) Researchers, both in human and non-human animal literature, continue to argue over the functions served by the rough-and-tumble play known as play-fighting (Power, 2000). During play-fighting, as one animal attacks another, the recipient may defend itself and then launch its own counterattack. The first attacker may then defend itself, and so on. The body targets contested can be derived from species-typical agonistic, predatory or socio-sexual behavior (Pellis, 1988,1993). Play-fighting is the most common form of play reported in non-human mammals (Pellis & Pellis, 1998a). In children freely interacting in the schoolyard or home, this type of play accounts for about 10% of all play (Smith, 2005), and, despite some minor cultural variations, has a basic theme that appears universal (Fry, 2005). Although play-fighting resembles serious fighting, a number of differences exist (Smith, 1997). Given that play-fighting can be distinguished from serious fighting, why do researchers emphasize different facets of the behavior and hence its potential to serve very different functions? In this chapter, we contend that to fully understand play-fighting, species differences must be taken seriously, and that this diversity can help unravel how play-fighting has evolved. Such an understanding can further our analysis of the functions play-fighting may serve. (PsycINFO Database Record (c) 2012 APA, all rights reserved)

AD - Pellis, Sergio M.: University of Lethbridge, Lethbridge, AB, Canada Pellis, Vivien C.: University of Lethbridge, Canadian Centre for Behavioural Neuroscience, Lethbridge, AB, Canada Reinhart, Christine J.: University of Lethbridge, Lethbridge, AB, Canada

ER -

TY - JOUR

ID - 1363

T1 - Gender variant and gender dysphoria in two young children. [References]

A1 - Perrin, Ellen; Smith, Nicola; Davis, Catherine; Spack, Norman; Stein, Martin

Y1 - 2010///

N1 - Peer Reviewed Journal: 2010-06258-011

English

Journal; Peer Reviewed Journal

KW - PsycInfo

KW - Rough and Tumble

KW - Gender Identity

KW - Human Sex Differences

KW - Major Depression

KW - Transgender

RP - NOT IN FILE

SP - Feb

EP - Mar

JF - Journal of Developmental and Behavioral Pediatrics

VL - .31

IS - 2

N2 - Alexandra is 5 1/2 years old, the youngest of four girls, and lives with her parents. She is described by her teachers as a thoughtful, imaginative girl with a good sense of humor, and strong literacy and math skills. Parents describe her typical mood as happy and easy going. She has many friends and engages in a variety of play activities. At 18 months, Alexandra insisted on wearing boys' underwear before she would complete toilet training. At 3 years, she told her parents that she "should have been a boy," and insisted on wearing boys' clothes. Alexandra now refuses to wear dresses and wears a coat and tie to formal occasions, which has led to conflicts with her grandparents. During make-believe play, Alexandra always chooses to play the male roles. She keeps her hair short and her dress and mannerisms are so masculine that people who do not know her assume that she is a boy. Alexandra makes frequent statements about being or wishing she were a boy. When asked directly she says "I'm a girl, but I'm a boy inside." Her parents have recently become alarmed because Alexandra has begun saying "I hate myself," and once said that when her breasts grow she will "slice them off." She has recently asked her parents to call her "Alex." There is no apparent bullying or teasing from other children. Alex's parents are understanding and supportive of her quandary, though they have questions and concerns about the long-term implications of these behaviors and choices. Chris is a 9-year-old boy, referred because of his preference for traditionally feminine clothing, toys, and activities. Chris's parents are divorced; he lives with his father and paternal grandparents, visiting his mother once a week. Chris met developmental milestones on time and always seemed "smart" and eager to learn. By 2 years of age, his family noticed that he was attracted to pretty and shiny things like dresses, sequins, and glitter, although he has always worn boys' clothing without complaint. During the next few years, he asked for Barbie dolls for his birthday and seemed fascinated by long blond hair. When coloring, he preferred pink and purple crayons and usually drew female characters, very decorated and with long hair. In comparison, his drawings of himself were small and plain. He occasionally said "I know I'm a boy, but I'm a girl in my head." His pediatrician advised the family to throw out the dolls and "girlish" toys, emphasize "male" activities, and insist that he draw boys as well as girls. Chris was so distraught by this that he was allowed to keep one Barbie doll, as long as he only played with it indoors and did not talk about the doll with friends. In kindergarten and first grade, Chris played mostly with girls and was not interested in sports or rough-and-tumble play. He was teased by other children and had few friends, mostly girls. He started to have sudden outbursts at home and at school that seemed beyond his control, sometimes kicking walls and punching himself in the head. At the beginning of third grade, Chris agreed to join the soccer team as his father wanted. His family no longer sees him playing with Barbies and he has agreed to a few play dates with new boys in his class. Chris is quieter than he used to be, with fewer outbursts. For his birthday, he privately asked his father's fiancée for a blond long-haired wig, but when his father confronted him, he denied it. His father reports that "the phase" has finally passed. (PsycINFO Database Record (c) 2012 APA, all rights reserved) (journal abstract)

SN - 0196-206X

AD - Perrin, Ellen: Division of Developmental-Behavioral Pediatrics, Floating Hospital for Children, Tufts Medical Center, Boston, MA, US Smith, Nicola: Division of Developmental-Behavioral Pediatrics, Floating Hospital for Children, Tufts Medical Center, Boston, MA, US Davis, Catherine: Division of Developmental-Behavioral Pediatrics, Floating Hospital for Children, Tufts Medical Center, Boston, MA, US Spack, Norman:

Gender Management Service, Children's Hospital, Boston Harvard Medical School, Boston, MA, US Stein, Martin T.: Division of Child Development and Community Health, University of California San Diego, Rady Children's Hospital, San Diego, CA, US

ER -

TY - JOUR

ID - 1364

T1 - Sibling violence silenced: rivalry, competition, wrestling, playing, roughhousing, benign. [Review] [43 refs]

A1 - Phillips,D.A.

A1 - Phillips,K.H.

A1 - Grupp,K.

A1 - Trigg,L.J.

Y1 - 2009/04//

N1 - Phillips, Debby A. Phillips, Kate H. Grupp, Kitty. Trigg, Lisa J

ANS. Advances in nursing science

6e9, 7809992

IM, N

Journal Article. Review

English

KW - Medline

KW - Rough and Tumble

KW - Adolescent

KW - Aggression/px [Psychology]

KW - Attitude to Health/eh [Ethnology]

KW - Child

KW - Child Abuse/eh [Ethnology]

KW - Child Abuse/pc [Prevention & Control]

KW - Child Advocacy

KW - Child Behavior/eh [Ethnology]

KW - Preschool

KW - Competitive Behavior

KW - Conflict (Psychology)

KW - Denial (Psychology)

KW - Humans

KW - Nurse's Role/px [Psychology]

KW - Nurse's Role

KW - Nursing Methodology Research

KW - Play and Playthings/px [Psychology]

KW - Postmodernism

KW - Semantics

KW - Sibling Relations/eh [Ethnology]

KW - Sibling Relations

KW - Social Behavior

KW - Social Justice

KW - Violence/eh [Ethnology]

KW - Violence/pc [Prevention & Control]

RP - NOT IN FILE

SP - E1

EP - E16

JF - Advances in Nursing Science

JA - ANS Adv.Nurs Sci

VL - 32

IS - 2

CY - United States

N2 - In this article, sibling violence and the silence surrounding it is explicated through professional literature and research findings, exemplars from clinical practice, and statistics. Theoretical positions and discourse analysis have been used to help explain how regular broken bones, bruises, lacerations, and verbal humiliation can be minimized as normal sibling rivalry or roughhousing, which does not cause serious consequences. Nursing should be on the front lines of ending practices of violence. Recognizing sibling violence as such is part of this work and is a social justice issue. [References: 43]

SN - 1550-5014

AD - College of Nursing, Seattle University, 901 12th Ave, Box 22200, Seattle, WA 98122, USA.

daphillip@seattleu.edu

UR - 19461218

ER -

TY - JOUR

ID - 1365

T1 - The overstimulation of everyday life: I. New aspects of male homosexuality

A1 - Phillips,S.H.

Y1 - 2001///

N1 - Phillips, S H

Journal of the American Psychoanalytic Association

h9z, 7505579

IM

Case Reports. Journal Article

English

KW - Medline

KW - Rough and Tumble

KW - Adaptation

KW - Psychological

KW - Adult

KW - Homosexuality

KW - Male/px [Psychology]

KW - Humans

KW - Male

KW - Psychoanalytic Theory

KW - Psychoanalytic Therapy

KW - Psychosexual Development

RP - NOT IN FILE

SP - 1235

EP - 1267

JF - Journal of the American Psychoanalytic Association

JA - J Am Psychoanal.Assoc.

VL - 49

IS - 4

CY - United States

N2 - Western heterosexual culture surrounds the homosexually inclined boy in a climate of erotic overstimulation that powerfully affects his development and adult sexual adaptation. This assertion is illustrated through a case presentation of a homosexual man who shared a bed with his brother from childhood into adolescence. Analysis of the patient's transference enactment--repeatedly falling asleep on the couch--gradually revealed the psychic impact of this everyday overstimulation: the creation of a tantalized inner world of longing. The regular occurrence and developmental understanding of adolescent homosexual boys' unrequited love affairs with adolescent heterosexual boys are described and explored. Finally, the overstimulation of everyday life is proposed as a new model for understanding certain behavioral aspects of male homosexuality, such as the avoidance of rough-and-tumble play in childhood and homosexual cruising

SN - 0003-0651

AD - Western New England Institute for Psychoanalysis, USA. Sidney.phillips@yale.edu

UR - 11809022

ER -



TY - JOUR

ID - 1366

T1 - Persistent vaginal bleeding in a patient with a broken Implanon

A1 - Pickard,S.

A1 - Bacon,L.

Y1 - 2002/10//

N1 - Pickard, Sally. Bacon, Lesley

The journal of family planning and reproductive health care / Faculty of Family Planning & Reproductive Health Care, Royal College of Obstetricians & Gynaecologists

101087687

IM

Case Reports. Journal Article

English

KW - Medline

KW - Rough and Tumble

KW - Adult

KW - Contraceptive Agents

KW - Female/ae [Adverse Effects]

KW - Desogestrel

KW - Equipment Failure

KW - Female

KW - Humans

KW - Menorrhagia/et [Etiology]

KW - Menstruation Disturbances/et [Etiology]

KW - Vinyl Compounds/ae [Adverse Effects]

RP - NOT IN FILE

SP - 207

EP - 208

JF - Journal of Family Planning & Reproductive Health Care

JA - J Fam.Plann.Reprod.Health Care

VL - 28

IS - 4

CY - England

N2 - A 29-year-old woman with an Implanon contraceptive device in situ presented with persistent and prolonged vaginal bleeding. The implant had been inserted 2 years previously; the patient had been happy with it and had been mainly amenorrhoeic with the occasional light period. She was concerned that the implant had broken during a game of 'rough and tumble' with her son in August 2000. Since the trauma to her arm her bleeding pattern had changed, and she began bleeding heavily for 3 weeks every month. The rod was removed and found to be fractured halfway across its width. A new Implanon device was inserted and the bleeding settled

SN - 1471-1893

AD - Department of Reproductive Health, Lewisham Primary Care Trust, London, UK.

s.pickard@macunlimited.net

UR - 12419064

ER -

TY - JOUR

ID - 1367

T1 - Toto's talking body. [References]

A1 - Poole,Gordon

Y1 - 2007///

N1 - Peer Reviewed Journal: 2007-12045-005

English

Journal; Peer Reviewed Journal

KW - PsycInfo

KW - Rough and Tumble

KW - Body Language

KW - Gestures

KW - Theatre

RP - NOT IN FILE

SP - 2007, pp

EP - 2007,253

JF - Gesture

VL - .7

IS - 2

N2 - The full-bodied, multi-faceted use of gesture by Italy's beloved vaudeville and cinema comedian Antonio De Curtis, in art Toto, is rooted in the rich gesture language of Naples. Toto's humble origins, the experience of poverty and deprivation, conditioned his art, as did his immersion as a mere child into the rough-and-tumble world of Neapolitan street theater. The teeming neighborhoods of Naples, a Baroque city, have made it into somewhat of a theatrum mundi, producing many fine actors and playwrights. The essay, illustrated by photograms from a few of Toto's films, suggests that Neapolitan gesture, whose purpose is communication, is stylized by Toto and transformed into artistry of a high order. (PsycINFO Database Record (c) 2012 APA, all rights reserved) (journal abstract)

SN - 1568-1475

AD - Poole, Gordon: Universita degli Studi "L'Orientale", Naples, Italy

ER -

TY - JOUR

ID - 1368

T1 - Reactive and proactive aggression in childhood: relations to peer status and social context dimensions

A1 - Price,J.M.

A1 - Dodge,K.A.

Y1 - 1989/08//

N1 - Price, J M. Dodge, K A

Journal of abnormal child psychology

0364547, h33

IM

Journal Article

English

KW - Medline

KW - Rough and Tumble

KW - Aggression/px [Psychology]

KW - Anger

KW - Child

KW - Preschool

KW - Cooperative Behavior

KW - Frustration

KW - Humans

KW - Interpersonal Relations

KW - Male

KW - Peer Group

KW - Play and Playthings

KW - Rejection (Psychology)

KW - Social Adjustment

RP - NOT IN FILE

SP - 455

EP - 471

JF - Journal of Abnormal Child Psychology

JA - J Abnorm.Child Psychol.

VL - 17

IS - 4

CY - UNITED STATES

N2 - Although there has been an accumulation of evidence to suggest a link between peer-directed aggression and social rejection, little attention has been given to the relations between specific subtypes of aggressive behavior and social rejection. The purpose of this investigation was to examine the relations between two subtypes of aggressive behavior (reactive and proactive aggression) and children's classroom peer status. The reciprocity of each of these subtypes of aggressive behavior and the social contexts in which these behaviors occur were also examined. Assessments of each of these forms of aggression among 70 boys (ages 5 and 6) were conducted using direct observations and teacher ratings. In general, directing reactive aggressive behavior toward peers was associated with social rejection, while utilization of instrumental aggression was positively related to peer status. The findings also indicated that directing proactive forms of aggression toward peers was related to being the target of proactive aggression. Finally, among older boys, both subtypes of aggression were more likely to occur during rough play than during any other type of play activity

SN - 0091-0627

AD - San Diego State University, California 92182

UR - 2794257

ER -

TY - JOUR

ID - 1369

T1 - A comparison of school injuries between children with and without disabilities

A1 - Ramirez,M.

A1 - Fillmore,E.

A1 - Chen,A.

A1 - Peek-Asa,C.

Y1 - 2010/09//

N1 - Ramirez, Marizen. Fillmore, Erin. Chen, Alex. Peek-Asa, Corinne

Academic pediatrics

101499145

IM

Comparative Study. Journal Article. Research Support, Non-U.S. Gov't. Research Support, U.S. Gov't, P.H.S.

English

KW - Medline

KW - Rough and Tumble

KW - Child

KW - Disabled Children/sn [Statistics & Numerical Data]

KW - Education

KW - Special

KW - Female

KW - Humans

KW - Learning Disorders/ep [Epidemiology]

KW - Los Angeles

KW - Male

KW - Retrospective Studies

KW - Schools

KW - Wounds and Injuries/ep [Epidemiology]

RP - NOT IN FILE

SP - 317

EP - 322

JF - Academic pediatrics

JA - Acad.Pediatr

VL - 10

IS - 5

CY - United States

N2 - OBJECTIVE: The aim of this study was to compare rates, nature, and mechanisms of school injuries in children with and without disabilities. METHODS: We conducted a retrospective cohort study with repeated measures of 269 919 children with and without disabilities who were enrolled in 35 adapted schools from a large urban school district. Reports of injuries sustained from 1994 to 1998 were collected by the district's

insurance division, and disability was assessed using special education guidelines determined by the California Department of Education. A generalized estimating equations model was used to estimate rate ratios, accounting for the repeated, nested nature of the data. RESULTS: Children with disabilities had more than double the rate of injury reported than children without disabilities (incidence density ratio [IDR] 2.3, 95% CI, 2.2-2.5). Almost one third of these injuries were due to fights, roughhousing, and assaults. Among all disabled children, those with orthopedic disabilities had the highest risk, with rates over 5 times that of children without disabilities (IDR 5.4, 95% CI, 4.4-6.6). Children with cognitive disabilities had comparatively lower rates of injury than children with physical disabilities. CONCLUSIONS: For children with disabilities, physical impairment may play a greater role than cognitive impairment in managing risk for injury at school. Individual education programs (IEP), developed for children in special education, could be tailored to include injury prevention strategies. Copyright 2010 Academic Pediatric Association. Published by Elsevier Inc. All rights reserved

SN - 1876-2867

AD - University of Iowa Injury Prevention Research Center, Department of Occupational and Environmental Health, College of Public Health, University of Iowa, Iowa City, Iowa 52242-5000, USA. marizen-ramirez@uiowa.edu

UR - 20674529

ER -

TY - JOUR

ID - 1370

T1 - Fair-play rules and injury reduction in ice hockey

A1 - Roberts,W.O.

A1 - Brust,J.D.

A1 - Leonard,B.

A1 - Hebert,B.J.

Y1 - 1996/02//

N1 - Roberts, W O. Brust, J D. Leonard, B. Hebert, B J

Archives of pediatrics & adolescent medicine

9422751, bwf

AIM, IM

Journal Article

English

KW - Medline

KW - Rough and Tumble

KW - Athletic Injuries/ep [Epidemiology]

KW - Athletic Injuries/et [Etiology]

KW - Hockey/in [Injuries]

KW - Hockey/st [Standards]

KW - Humans

KW - Incidence

KW - Male

KW - Minnesota/ep [Epidemiology]

KW - Prospective Studies

RP - NOT IN FILE

SP - 140

EP - 145

JF - Archives of Pediatrics & Adolescent Medicine

JA - Arch.Pediatr Adolesc Med

VL - 150

IS - 2

CY - UNITED STATES

N2 - OBJECTIVE: To determine the rate, type, and severity of injuries incurred and penalties assessed during the qualifying fair-play (points for playing without excessive penalties) and championship "regular" rules (winner advances) portions of a 1994 Junior Gold ice hockey tournament. DESIGN: A prospective evaluation of injuries by certified athletic trainers at the tournament site. SETTING: A community-organized, 3-day, 31-game tournament in Minnesota. PARTICIPANTS: Two hundred seventy-three male players, younger than 20 years

and in high school. MEASUREMENTS/MAIN RESULTS: Injuries were recorded by an on-site certified athletic trainer, and the penalties were tallied from the score sheets. The injury rates for the total number of injuries were 26.4 injuries per 1000 athlete exposures and 273.8 injuries per 1000 player hours. When only notable injuries (concussion, facial laceration, or moderate level of severity and above) were considered, the injury rates were 10 per 1000 athlete exposures and 103.9 per 1000 player hours. The ratio of notable fair-play to notable regular-rules injuries was 1:4.8. The number of penalties assessed per game averaged 7.1 penalties during fair-play rules and 13 penalties during the regular-rules competition. Penalties related to rough play and injury occurred four times more frequently during games with regular rules than those with fair-play rules. CONCLUSIONS: The fair-play concept can reduce injury rates, penalty rates, and severity of penalties and should be considered for ice hockey at all levels of play. The fair-play concept could be applied to other contact sports to reduce injury rates and rules infractions

SN - 1072-4710

AD - MinnHealth SportsCare Consultants, White Bear Lake, Minn, USA

UR - 8556117

ER -

TY - JOUR

ID - 1371

T1 - Gender differences in playful aggression during courtship in college students. [References]

A1 - Ryan, Kathryn M.

Y1 - 2005///

N1 - Peer Reviewed Journal: 2006-04126-011

English

Journal; Peer Reviewed Journal

KW - PsycInfo

KW - Rough and Tumble

KW - Aggressive Behavior

KW - Human Sex Differences

KW - Psychosexual Behavior

KW - Sexual Attitudes

KW - College Students

KW - Human Courtship

KW - Sexual Intercourse (Human)

RP - NOT IN FILE

SP - Oct

EP - 601

JF - Sex Roles

VL - .53

IS - 7-8

N2 - The current study explored gender differences in college students' definitions and enjoyment of playful force and aggression. Ninety-six female and 55 male college students who were predominantly White (96%) and heterosexual (97%) answered questions about playful force during sex and playful aggression at other times. A content analysis showed that the current definitions were very similar to those for children's rough-and-tumble play. However, a qualitative analysis found several potential gender differences. Physically aggressive men appeared to give aggressive definitions of playful force during sex. In addition, there was some disagreement among participants as to the acceptability of playful force during sex. Finally, there may be gender differences in the assumed agency of playful force and aggression. (PsycINFO Database Record (c) 2013 APA, all rights reserved) (journal abstract)

SN - 0360-0025

AD - Ryan, Kathryn M.: Lycoming College, Williamsport, PA, US Mohr, Sharon: Lycoming College, Williamsport, PA, US

ER -

TY - JOUR

ID - 1372

T1 - Wichern

A1 - Schaff, Philip

Y1 - 1857///

N1 - Book: 2009-21494-038

English

Book; Authored Book

KW - PsycInfo

KW - Rough and Tumble

KW - Christianity

KW - Religion

KW - Theology

RP - NOT IN FILE

SP - theology, and

EP - 418

JF - Schaff, Philip

IS - 1857

N2 - (create) We conclude these sketches with the most distinguished representative of practical Christianity in Germany, who converts the ideas of modern evangelical theology into deeds of charity, and goes forth from his study to the lanes of public life, the dens of misery, and the hells of vice, to do the work of the merciful Samaritan, and, as far as in him lies, to reclaim society to the gospel of peace. Topics covered in this chapter include character of Wichern; Christian philanthropy; the Rough House; personal interviews; the Church Diet and the Inner Mission; the Evangelical Conference and the Diaconate; Flieder and the deaconesses; Wichern in Prussia; and, concluding reflections on the prospects of Christianity in Germany. (PsycINFO Database Record (c) 2012 APA, all rights reserved)

AD - Schaff, Philip: Theological Seminary, Mercersburg, PA, US

ER -

TY - JOUR

ID - 1373

T1 - Henry Harrower and the turbulent beginnings of endocrinology

A1 - Schwartz, T.B.

Y1 - 1999/11/02/

N1 - Schwartz, T B

Annals of internal medicine

0372351, 5a6

AIM, IM, Q

Biography. Historical Article. Journal Article

English

KW - Medline

KW - Rough and Tumble

KW - Endocrinology/hi [History]

KW - History

KW - 19th Century

KW - 20th Century

KW - Humans

KW - Societies

KW - Medical/hi [History]

KW - United States

RP - NOT IN FILE

SP - 702

EP - 706

JF - Annals of Internal Medicine

JA - Ann.Intern.Med

VL - 131

IS - 9

CY - UNITED STATES

N2 - The emergence of new medical science in the mid-19th century was usually greeted with derision by "practical men" who saw their academic colleagues as elitist intellectuals whose work bore little or no relation to the rough-and-tumble aspects of patient care. This schism, which was nowhere greater than in the field of endocrinology, widened in 1891 when a myxedematous patient was dramatically restored to health after the administration of a thyroid extract. On the one hand, academicians-who saw this result as a triumphal example of the transference of laboratory studies to the bedside--were encouraged to pursue further studies in endocrine pathophysiology and pharmacology. On the other hand, medical practitioners began to believe that crude extracts from glands or other organs, when prescribed as orally administered mixtures, were effective for the treatment of most human ailments. The organotherapeutic forces were ably championed by Henry R. Harrower, MD, a manufacturer as well as a dispenser of organotherapeutic products. For some years, the claims of the organotherapists remained unchallenged. Finally, in 1921, Harvey Cushing, pioneer neurosurgeon and endocrinologist, launched a crushing assault on the purveyors of pluriglandular therapy. These attacks continued over ensuing years, and organotherapy fell into disrepute. Nevertheless, the assertions of "practical men" have not subsided; rather, we are now confronted by insistent claims for a bewildering array of herbal remedies, over-the-counter hormonal products, and alternative therapies

SN - 0003-4819

AD - Rush Medical College, Chicago, Illinois, USA

UR - 10577334

ER -

TY - JOUR

ID - 1374

T1 - Knife-related injuries treated in United States emergency departments, 1990-2008

A1 - Smith,G.A.

Y1 - 2013/09//

N1 - Smith, Gary A

The Journal of emergency medicine

ibo, 8412174

IM

Journal Article

English

KW - Medline

KW - Rough and Tumble

RP - NOT IN FILE

SP - 315

EP - 323

JF - Journal of Emergency Medicine

JA - J Emerg.Med

VL - 45

IS - 3

CY - United States

N2 - **BACKGROUND:** Knives cause more disabling injuries than any other type of hand tool. **STUDY OBJECTIVES:** This study investigates knife-related injuries requiring Emergency Department (ED) treatment among children and adults in the United States (US) from 1990 through 2008. **METHODS:** A retrospective analysis of data from the National Electronic Injury Surveillance System of the Consumer Product Safety Commission was conducted. **RESULTS:** An estimated 8,250,914 (95% confidence interval [CI] 7,149,074-9,352,755) knife-related injuries were treated in US EDs from 1990 to 2008, averaging 434,259 (95% CI 427,198-441,322) injuries annually, or 1190 per day. The injury rate was 1.56 injuries per 1000 US resident population per year. Fingers/thumbs (66%; 5,447,467 of 8,249,410) were injured most often, and lacerations (94%; 7,793,487 of 8,249,553) were the most common type of injury. Pocket/utility knives were associated with injury most often (47%; 1,169,960 of 2,481,994), followed by cooking/kitchen knives (36%; 900,812 of 2,481,994). Children were more likely than adults to be injured while playing with a knife or during horseplay ( $p < 0.01$ ; odds ratio 9.57; 95% CI 8.10-11.30). One percent of patients were admitted to the hospital, and altercation-related stabbings to the trunk accounted for 52% of these admissions. **CONCLUSIONS:** Knives represent an important source of morbidity and mortality to people of all ages. Manufacturers should develop safer knife designs that incorporate features, such as improved opening and closing mechanisms on pocket

knives, to prevent these injuries. Other potential safety efforts include targeted educational interventions and changes in voluntary product safety standards and public policy. Copyright 2013 Elsevier Inc. All rights reserved

SN - 0736-4679

AD - Center for Injury Research and Policy, The Research Institute at Nationwide Children's Hospital, Columbus, Ohio, USA

UR - 23849364

ER -

TY - JOUR

ID - 1375

T1 - Evolutionary developmental psychology and socio-emotional development. [Spanish]. [References]

A1 - Smith, Peter K.

Y1 - 2003///

N1 - Peer Reviewed Journal: 2003-09642-004

Spanish

Journal; Peer Reviewed Journal

KW - PsycInfo

KW - Rough and Tumble

KW - Emotional Development

KW - Family Relations

KW - Human Development

KW - Peer Relations

KW - Psychosocial Development

KW - Adolescent Development

KW - Aggressive Behavior

KW - Childhood Development

KW - Developmental Psychology

KW - Evolutionary Psychology

KW - Human Sex Differences

KW - Infant Development

KW - Parent Child Relations

KW - Sibling Relations

RP - NOT IN FILE

SP - 2003, pp

EP - 2003,324

JF - Infancia y Aprendizaje / Journal for the Study of Education and Development

VL - .26

IS - 3

N2 - Evolutionary developmental psychology is relevant to understanding many aspects of socio-emotional development in infancy, childhood and adolescence. This article focuses on parental investment and paternity certainty, child abuse, grandparenting, and parent-offspring conflict; sibling relationships and theory of mind; children's peer groups, especially dominance, aggression, sex differences and pretend and rough-and-tumble play; and on a model linking early family experiences to peer behaviour, age of puberty and reproductive behaviour. The review illustrates some of the potential of evolutionary developmental psychology in providing a comprehensive framework for understanding many aspects of social behaviour, and of providing testable hypotheses. Evolutionary explanations should be seen as compatible with cultural and environmental explanations, that may provide the proximal mechanisms by which the more distal functions of these behaviours are typically realised in actual developmental process and experience. (PsycINFO Database Record (c) 2014 APA, all rights reserved) (journal abstract)

SN - 0210-3702

AD - Smith, Peter K.: Department of Psychology, Goldsmiths College, London, England

ER -

TY - JOUR

ID - 1376



T1 - Fathers' role in children's language development. [References]

A1 - Tamis-LeMonda, Catherine S; Baumwell, Lisa; Cabrera, Natasha

Y1 - 2013///

N1 - Book: 2012-30818-008

English

Book; Edited Book

KW - PsycInfo

KW - Rough and Tumble

KW - Father Child Communication

KW - Fathers

KW - Home Environment

KW - Language Development

KW - Parental Role

KW - Childhood Development

KW - Early Childhood Development

KW - Language

KW - Lower Income Level

RP - NOT IN FILE

SP - 486

JF - Cabrera, Natasha J [Ed]; Tamis-LeMonda, Catherine S [Ed]

IS - 2013

N2 - (from the chapter) The majority of research on parents' role in children's language development is based on observations of mother-child interactions. For the most part, fathers have not been included in such research, leaving a dearth of knowledge regarding their role in children's early language development. Although there has been a gradual movement towards including fathers in language research over the past two decades, this oversight is partly rooted in historically narrow characterizations of fathers as "breadwinners" and/or "rough-and-tumble playmates", as well as in a dominant research focus on associations between father "absence" or "presence" and children's behavior problems, delinquency, and school drop out. Moreover, mothers are generally more available to researchers than fathers; are expected to be more familiar with their children and to be children's principal communicative partners; and, are thought to influence their children's language development more so than fathers. Nonetheless, there exist several practical and theoretical reasons for broadening the scope of language development studies to include fathers. First, trends over the past several decades have resulted in rising numbers of mothers joining the labor market; changes to the distribution of household labor; and, major shifts in family structure. Second, it is particularly important to understand fathers' role in the language development of children living in low-income households. Finally, efforts to advance a deeper theoretical understanding of children's early language development in social context rests on documenting the full range of language "inputs" to the system (including mothers', fathers', and other adults' lexicons, syntax, pragmatics, and so forth) in relation to the full range of emerging language "products," including growth in children's receptive and productive vocabularies, syntactic and pragmatic skills. Including fathers in language research moves investigators a step closer to understanding the major "inputs" in children's language environments. (PsycINFO Database Record (c) 2014 APA, all rights reserved)

AD - Tamis-LeMonda, Catherine S.: New York University, New York, NY, US Baumwell, Lisa: New York University, New York, NY, US Cabrera, Natasha J.: University of Maryland, MD, US

ER -

TY - JOUR

ID - 1377

T1 - Rough and tumble play: An investigation of the perceptions of educators and young children. [References]

A1 - Tannock, Michelle T.

Y1 - 2008///

N1 - Peer Reviewed Journal: 2008-05090-009

English

Journal; Peer Reviewed Journal

KW - PsycInfo

KW - Rough and Tumble

KW - Child Attitudes

KW - Childhood Play Behavior

KW - Early Childhood Development

KW - Educational Programs

KW - Teacher Attitudes

RP - NOT IN FILE

SP - Feb

EP - 361

JF - Early Childhood Education Journal

VL - .35

IS - 4

N2 - This research investigated rough and tumble (R&T) play in two early childhood settings. Participants included 11 educators and 17 children (5 years old). The study focused on gaining an understanding of how early childhood educators and young children interpret R&T play. The results indicate that while there is perceived value in R&T related to the development of young children, educators are uncertain of how to manage the play. The results of this study demonstrate the need for early childhood programs to develop policies to guide how R&T is managed. (PsycINFO Database Record (c) 2012 APA, all rights reserved) (journal abstract)

SN - 1082-3301

AD - Tannock, Michelle T.: Special Education, University of Nevada, Las Vegas, Las Vegas, NV, US

ER -

TY - JOUR

ID - 1378

T1 - Bioethics: The citizen view and its perils. [References]

A1 - Timpane,John

Y1 - 2009///

N1 - Book: 2009-09394-005

English

Book; Edited Book

KW - PsycInfo

KW - Rough and Tumble

KW - Bioethics

KW - Political Issues

KW - Public Opinion

RP - NOT IN FILE

SP - 828

JF - Ravitsky, Vardit [Ed]; Fiester, Autumn [Ed]; Caplan, Arthur L [Ed]

IS - 2009

N2 - (from the chapter) Most people see bioethics as a set of political issues-matters of public policy they can vote up or down. They do not see them primarily as scientific issues because, to them, science is somewhat of a hermetically sealed-off realm, poorly explained, and none too responsive. Yes, these are outdated cliches about science; that doesn't matter. Many people see bioethical issues either as intensely personal matters-if the issues touch their own lives-or already politicized and partisanized matters (that is, issues for debate between the political parties), much the same as nonscientific policy issues. Bioethical issues get thrown in the ring and batted around as part of the rough-and-tumble of the democratic process in this country. So here are a few thoughts about what happens, or should happen, with bioethics in the public sphere. (PsycINFO Database Record (c) 2012 APA, all rights reserved)

AD - Timpane, John: Philadelphia Inquirer, Philadelphia, PA, US

ER -

TY - JOUR

ID - 1379

T1 - The experience of dog bites: a survey of veterinary science and veterinary nursing students

A1 - Wake,A.A.

A1 - Stafford,K.J.

A1 - Minot,E.O.

Y1 - 2006/06//

N1 - Wake, A A F. Stafford, K J. Minot, E O

New Zealand veterinary journal

0021406, obz

IM

Journal Article

English

KW - Medline

KW - Rough and Tumble

KW - Adolescent

KW - Adult

KW - Age Factors

KW - Animals

KW - Bites and Stings/co [Complications]

KW - Bites and Stings/ep [Epidemiology]

KW - Breeding

KW - Child

KW - Preschool

KW - Dogs

KW - Facial Injuries/ep [Epidemiology]

KW - Female

KW - Hand Injuries/ep [Epidemiology]

KW - Humans

KW - Male

KW - New Zealand

KW - Questionnaires

KW - Risk

KW - Rural Population/sn [Statistics & Numerical Data]

KW - Severity of Illness Index

KW - Sex Factors

KW - Wounds and Injuries/ep [Epidemiology]

KW - Wounds and Injuries/et [Etiology]

KW - Wounds and Injuries/pa [Pathology]

RP - NOT IN FILE

SP - 141

EP - 146

JF - New Zealand Veterinary Journal

JA - N.Z.Vet.J

VL - 54

IS - 3

CY - New Zealand

N2 - AIM: To investigate the circumstances of dogs biting people in New Zealand. METHODS: Veterinary science and veterinary nursing students enrolled at Massey University in 2003 completed a questionnaire detailing their lifetime experience of dog bites and their opinions of dog control legislation. RESULTS: The response rate was 100%. There were 228 completed responses to the survey, and 87 (38%) respondents had been bitten by a dog. Most bites caused minor injury, but 17 (20%) required medical attention. Male respondents were more likely to have been bitten. The highest proportion of respondents (27; 31%) had been bitten while between 6 and 10 years of age, and the hand was the part of the body most often injured. Eighteen (21%) bites involved a stranger's dog, but most bites were by a dog known to the victim. Respondents from rural areas were three times more likely to have been bitten than city dwellers. The victim's home was the place where most (31; 36%) bites occurred. Male dogs were responsible for a larger proportion of bites (38; 44%) than females (24; 28%); respondents were unsure about the sex of the remainder of the dogs (25; 29%) that bit them. Protecting the home, play, accidents, rough handling and pain were identified as the common reasons for dogs to bite. Most (46; 52%) respondents did not believe legislation could have prevented their bite. Only four (5%) bites were reported to authorities. CONCLUSION: Rural dwellers, people with more experience of dogs, children <11 years of age, and male respondents were bitten by dogs most often. Only legislation relating to the

fencing of dog owners' properties may have prevented a reasonable proportion (25; 29%) of the bites reported here

SN - 0048-0169

AD - Ecology Group, Institute of Natural Resources, Massey University, Private Bag 11222, Palmerston North, New Zealand

UR - 16751845

ER -

TY - JOUR

ID - 1380

T1 - Sexual differentiation of behaviour in monkeys: role of prenatal hormones. [Review] [45 refs]

A1 - Wallen, K.

A1 - Hassett, J.M.

Y1 - 2009/03//

N1 - Wallen, K. Hassett, J M

Journal of neuroendocrinology

brl, 8913461

IM

Journal Article. Review

English

KW - Medline

KW - Rough and Tumble

KW - Androgens/me [Metabolism]

KW - Animals

KW - Behavior

KW - Animal/ph [Physiology]

KW - Female

KW - Haplorhini/ph [Physiology]

KW - Humans

KW - Male

KW - Maternal Behavior/px [Psychology]

KW - Pregnancy

KW - Prenatal Exposure Delayed Effects

KW - Sex Characteristics

KW - Sex Differentiation/ph [Physiology]

KW - Sex Factors

KW - Testosterone/me [Metabolism]

KW - Vocalization

RP - NOT IN FILE

SP - 421

EP - 426

JF - Journal of Neuroendocrinology

JA - J Neuroendocrinol.

VL - 21

IS - 4

CY - England

N2 - The theoretical debate over the relative contributions of nature and nurture to the sexual differentiation of behaviour has increasingly moved towards an interactionist explanation that requires both influences. In practice, however, nature and nurture have often been seen as separable, influencing human clinical sex assignment decisions, sometimes with disastrous consequences. Decisions about the sex assignment of children born with intersex conditions have been based almost exclusively on the appearance of the genitals and how other's reactions to the gender role of the assigned sex affect individual gender socialisation. Effects of the social environment and gender expectations in human cultures are ubiquitous, overshadowing the potential underlying biological contributions in favour of the more observable social influences. Recent work in nonhuman primates showing behavioural sex differences paralleling human sex differences, including toy preferences, suggests that less easily observed biological factors also influence behavioural sexual differentiation in both monkeys and

humans. We review research, including Robert W. Goy's pioneering work with rhesus monkeys, which manipulated prenatal hormones at different gestation times and demonstrated that genital anatomy and specific behaviours are independently sexually differentiated. Such studies demonstrate that, for a variety of behaviours, including juvenile mounting and rough play, individuals can have the genitals of one sex but show the behaviour more typical of the other sex. We describe another case, infant distress vocalisations, where maternal responsiveness is best accounted for by the mother's response to the genital appearance of her offspring. Taken together, these studies demonstrate that sexual differentiation arises from complex interactions where anatomical and behavioural biases, produced by hormonal and other biological processes, are shaped by social experience into the behavioural sex differences that distinguish males and females. [References: 45]

SN - 1365-2826

AD - Department of Psychology and Yerkes National Primate Research Center, Emory University, Atlanta, GA 30322, USA. kim@emory.edu

UR - 19207815

ER -

TY - JOUR

ID - 1381

T1 - Coated kapok fiber for removal of spilled oil

A1 - Wang,J.

A1 - Zheng,Y.

A1 - Wang,A.

Y1 - 2013/04/15/

N1 - Wang, Jintao. Zheng, Yian. Wang, Aiqin

Marine pollution bulletin

0260231, dvz

IM

Journal Article. Research Support, Non-U.S. Gov't

English

KW - Medline

KW - Rough and Tumble

KW - Absorption

KW - Ceiba

KW - Environmental Remediation/mt [Methods]

KW - Oils/an [Analysis]

KW - Paraffin/an [Analysis]

KW - Petroleum/an [Analysis]

KW - Petroleum Pollution

KW - Soybean Oil/an [Analysis]

KW - Water Pollutants

KW - Chemical/an [Analysis]

RP - NOT IN FILE

SP - 91

EP - 96

JF - Marine Pollution Bulletin

JA - Mar.Pollut.Bull.

VL - 69

IS - 1-2

CY - England

N2 - Based on raw kapok fiber, two kinds of oil absorbers with high sorption capacity were prepared by a facile solution-immersion process. The coated polymer with low surface energy and rough fiber surface play important role in the retention of oil. The as-prepared fiber can quickly absorb gasoline, diesel, soybean oil, and paraffin oil up to above 74.5%, 66.8%, 64.4% and 47.8% of oil sorption capacity of raw fiber, respectively. The absorbed oils can be easily recovered by a simple vacuum filtration and the recovered coated-fiber still can be used for several cycles without obvious loss in oil sorption capacity. The thermodynamic study indicates that the adsorption process is spontaneous and exothermic, with complex physisorption and chemisorption. The results

suggest that the coated fiber can be used as a low-cost alternative for the removal of oil spilled on water surface.

Copyright 2013 Elsevier Ltd. All rights reserved

SN - 1879-3363

AD - Center of Eco-Material and Green Chemistry, Lanzhou Institute of Chemical Physics, Chinese Academy of Sciences, Lanzhou 730000, PR China

UR - 23419751

ER -

TY - JOUR

ID - 1382

T1 - Equine assisted therapy and theraplay. [References]

A1 - Weiss,Deborah

Y1 - 2009///

N1 - Book: 2009-08519-017

English

Book; Edited Book

KW - PsycInfo

KW - Rough and Tumble

KW - Animal Assisted Therapy

KW - Horses

KW - Play Therapy

KW - Therapists

RP - NOT IN FILE

SP - 300

JF - Munns, Evangeline [Ed]

IS - 2009

N2 - (from the chapter) In the 70s, horses began to take the role of "co-therapist" and the horses' special talents are now being written about. New methods are developing all over North America and Europe "Equine Assisted Therapy" has become a viable subgroup of Animal Assisted Therapy. Horses provide a powerful paradox. They are large, strong, fast animals that can quickly become dangerous and they are also vulnerable prey animals. Being carried on the back of a 1,200 pound vulnerable giant can certainly provide access to core personal issues. Partnering Theraplay with Irwin's horse training methods creates a powerful therapeutic tool. I developed the program "Horse Friends" to encompass these two modalities and it has since expanded to include activities from a number of equine trainers. With the encouragement of Dr. Evangeline Munns, who was director of Play Therapy Services at Blue Hills Child and Family Centre in Aurora at the time, I contacted the Ontario Trillium Foundation to see if they would be interested in funding such a venture. They were-and two years later the provincial funding agency had supported 35 children to participate in this pilot project. They continue to support our work and research to this day. The original program still exists under the name "Horse Play" and it is run by Horses At Heart Equestrian Adventures Inc. in conjunction with a number of regional child and family health service agencies. (PsycINFO Database Record (c) 2012 APA, all rights reserved)

AD - Weiss, Deborah: Theraplay Institute, IL, US

ER -

TY - JOUR

ID - 1383

T1 - Gunshot residue, ten years later

A1 - Wilber,C.G.

A1 - Lantz,R.K.

A1 - Sulik,P.L.

Y1 - 1991/09//

N1 - Wilber, C G. Lantz, R K. Sulik, P L

The American journal of forensic medicine and pathology  
3hc, 8108948

IM

Case Reports. Journal Article

English

KW - Medline  
KW - Rough and Tumble  
KW - Antimony/an [Analysis]  
KW - Barium/an [Analysis]  
KW - Child  
KW - Firearms  
KW - Forensic Medicine/mt [Methods]  
KW - Humans  
KW - Jurisprudence  
KW - Lead/an [Analysis]  
KW - Male  
KW - Microscopy  
KW - Electron  
KW - Scanning  
KW - Paraplegia/et [Etiology]  
KW - Skin/ch [Chemistry]  
KW - Skin/pa [Pathology]  
KW - Skin/ul [Ultrastructure]  
KW - Wounds  
KW - Gunshot/co [Complications]  
KW - Gunshot/pa [Pathology]  
RP - NOT IN FILE  
SP - 204  
EP - 206  
JF - American Journal of Forensic Medicine & Pathology  
JA - Am J Forensic Med Pathol.  
VL - 12  
IS - 3  
CY - UNITED STATES

N2 - Gunshot residues may be central to a competent reconstruction of a shooting incident. When a young boy was shot in the neck by a playmate using a .22-caliber single-action revolver, permanent paralysis from mid-thorax downward ensued. Ten years later the victim sued the importer, the vendor, the German manufacturer, and the shooter's family. Investigative reports indicated "horseplay" and questionable emergency medical team care. Depositions were contradictory. The entry wound, removed at surgery, was fixed and processed for slides. The histopathologist referred to "black pigment granules" in the wound track. The 10-year-old slides and block were retrieved. The coverslip was removed from a representative slide that was examined under the scanning, x-ray dispersive microscope. The black granules contained amounts of lead, barium, and antimony far beyond any normal range. The firing range had to have been no greater than 6-12 in (15.24-30.48 cm). The case was promptly settled out of court

SN - 0195-7910  
AD - Forensic Science Laboratory, Colorado State University, Fort Collins 80523  
UR - 1750390  
ER -

TY - JOUR  
ID - 1384  
T1 - Testing social acoustic memory in rats: effects of stimulus configuration and long-term memory on the induction of social approach behavior by appetitive 50-kHz ultrasonic vocalizations  
A1 - Woehr,M.  
A1 - Schwarting,R.K.  
Y1 - 2012/09//  
N1 - Woehr, Markus. Schwarting, Rainer K W  
Neurobiology of learning and memory  
9508166  
IM

Journal Article. Research Support, Non-U.S. Gov't

English

KW - Medline

KW - Rough and Tumble

KW - Acoustic Stimulation

KW - Animals

KW - Appetitive Behavior/ph [Physiology]

KW - Behavior

KW - Animal/de [Drug Effects]

KW - Animal/ph [Physiology]

KW - Disease Models

KW - Animal

KW - Humans

KW - Male

KW - Memory

KW - Long-Term/de [Drug Effects]

KW - Long-Term/ph [Physiology]

KW - Muscarinic Antagonists/pd [Pharmacology]

KW - Rats

KW - Wistar

KW - Schizophrenia/pp [Physiopathology]

KW - Scopolamine Hydrobromide/pd [Pharmacology]

KW - Social Behavior

KW - Sound Spectrography

KW - Verbal Learning

KW - Vocalization

RP - NOT IN FILE

SP - 154

EP - 164

JF - Neurobiology of Learning & Memory

JA - Neurobiol.Learn.Mem.

VL - 98

IS - 2

CY - United States

N2 - Rats emit distinct types of ultrasonic vocalizations (USVs), which serve as situation-dependent affective signals. In appetitive situations, such as rough-and-tumble-play, high-frequency 50-kHz USVs occur, whereas low-frequency 22-kHz USVs can be observed in aversive situations, such as social defeat. USVs serve distinct communicative functions and induce call-specific behavioral responses in the receiver. While aversive 22-kHz USVs serve as alarm calls and induce behavioral inhibition, appetitive 50-kHz USVs have a pro-social communicative function and elicit social approach behavior, supporting the notion that they serve as social contact calls to (re)establish or maintain contact among conspecifics. The aim of the present study was to use the rat's ability to communicate in the ultrasonic range via high-frequency 50-kHz USVs in order to develop a test for social acoustic memory in rats with relevance for human verbal memory. Verbal learning and memory is among the seven cognitive domains identified as commonly deficient in human schizophrenia patients, but particularly difficult to model. We therefore tested whether the induction of social approach behavior by playback of appetitive 50-kHz USVs is dependent on (1) acoustic stimulus configuration and (2) social long-term memory, and whether (3) social long-term memory effects can be blocked by the administration of scopolamine, a muscarinic acetylcholine antagonist producing amnesia. Results show that social approach behavior in response to playback of natural 50-kHz USVs depends on acoustic stimulus configuration and occurs only when sound energy is concentrated to a critical frequency band in the ultrasonic range. Social approach behavior was detected during the first exposure to playback of 50-kHz USVs, whereas no such response was observed during the second exposure 1 week later, indicating a stable memory trace. In contrast, when memory formation was blocked by i.p. administration of scopolamine (0.5mg/kg or 1.5mg/kg) immediately after the first exposure, rats displayed social approach behavior during the second exposure as well. Induction of social approach behavior in response to repeated playback of natural 50-kHz USVs may therefore



provide a new and rather unique approach for testing social acoustic memory in rats with relevance to human verbal memory. Copyright 2012 Elsevier Inc. All rights reserved

SN - 1095-9564

AD - Behavioral Neuroscience, Experimental and Physiological Psychology, Philipps-University of Marburg, Gutenbergstr. 18, 35032 Marburg, Germany. markus.woehr@staff.uni-marburg.de

UR - 22677211

ER -

TY - JOUR

ID - 1385

T1 - Affective communication in rodents: ultrasonic vocalizations as a tool for research on emotion and motivation

A1 - Woehr,M.

A1 - Schwarting,R.K.

Y1 - 2013/10//

N1 - Woehr, Markus. Schwarting, Rainer K W

Cell and tissue research

cqd, 0417625

IM

Journal Article. Research Support, Non-U.S. Gov't

English

KW - Medline

KW - Rough and Tumble

RP - NOT IN FILE

SP - 81

EP - 97

JF - Cell & Tissue Research

JA - Cell Tissue Res.

VL - 354

IS - 1

CY - Germany

N2 - Mice and rats emit and perceive calls in the ultrasonic range, i.e., above the human hearing threshold of about 20 kHz: so-called ultrasonic vocalizations (USV). Juvenile and adult rats emit 22-kHz USV in aversive situations, such as predator exposure and fighting or during drug withdrawal, whereas 50-kHz USV occur in appetitive situations, such as rough-and-tumble play and mating or in response to drugs of abuse, e.g., amphetamine. Aversive 22-kHz USV and appetitive 50-kHz USV serve distinct communicative functions. Whereas 22-kHz USV induce freezing behavior in the receiver, 50-kHz USV lead to social approach behavior. These opposite behavioral responses are paralleled by distinct patterns of brain activation. Freezing behavior in response to 22-kHz USV is paralleled by increased neuronal activity in brain areas regulating fear and anxiety, such as the amygdala and periaqueductal gray, whereas social approach behavior elicited by 50-kHz USV is accompanied by reduced activity levels in the amygdala but enhanced activity in the nucleus accumbens, a brain area implicated in reward processing. These opposing behavioral responses, together with distinct patterns of brain activation, particularly the bidirectional tonic activation or deactivation of the amygdala elicited by 22-kHz and 50-kHz USV, respectively, concur with a wealth of behavioral and neuroimaging studies in humans involving emotionally salient stimuli, such as fearful and happy facial expressions. Affective ultrasonic communication therefore offers a translational tool for studying the neurobiology underlying socio-affective communication. This is particularly relevant for rodent models of neurodevelopmental disorders characterized by social and communication deficits, such as autism and schizophrenia

SN - 1432-0878

AD - Behavioral Neuroscience, Experimental and Physiological Psychology, Philipps University of Marburg, Gutenbergstrasse 18, 35032, Marburg, Germany, markus.woehr@staff.uni-marburg.de

UR - 23576070

ER -

TY - JOUR

ID - 1386

T1 - A modified screening tool for autism (Checklist for Autism in Toddlers [CHAT-23]) for Chinese children

A1 - Wong, V.

A1 - Hui, L.H.

A1 - Lee, W.C.

A1 - Leung, L.S.

A1 - Ho, P.K.

A1 - Lau, W.L.

A1 - Fung, C.W.

A1 - Chung, B.

Y1 - 2004/08//

N1 - Wong, Virginia. Hui, Lai-Hing Stella. Lee, Wing-Cheong. Leung, Lok-Sum Joy. Ho, Po-Ki Polly. Lau, Wai-Ling Christine. Fung, Cheuk-Wing. Chung, Brian

Pediatrics

oxv, 0376422

AIM, IM

Journal Article

English

KW - Medline

KW - Rough and Tumble

KW - Attention

KW - Autistic Disorder/di [Diagnosis]

KW - China/eh [Ethnology]

KW - Cohort Studies

KW - Cost-Benefit Analysis

KW - Cross-Sectional Studies

KW - Humans

KW - Infant

KW - Mass Screening

KW - Play and Playthings

KW - Questionnaires

KW - Sensitivity and Specificity

KW - Social Behavior

RP - NOT IN FILE

SP - e166

EP - e176

JA - Pediatrics

VL - 114

IS - 2

CY - United States

N2 - **BACKGROUND:** There is a recent trend of a worldwide increase in the incidence of autistic spectrum disorder. Early identification and intervention have proved to be beneficial. The original version of the Checklist for Autism in Toddlers (CHAT) was a simple screening tool for identification of autistic children at 18 months of age in the United Kingdom. Children with an absence of joint attention (including protodeclarative pointing and gaze monitoring) and pretend play at 18 months were at high risk of autism. Section A of the CHAT was a self-administered questionnaire for parents, with 9 yes/no questions addressing the following areas of child development: rough and tumble play, social interest, motor development, social play, pretend play, protoimperative pointing (pointing to ask for something), protodeclarative pointing, functional play, and showing. Section B of the CHAT consisted of 5 items, which were recorded with observation of the children by general practitioners or health visitors. The 5 items addressed the child's eye contact, ability to follow a point (gaze monitoring), pretend (pretend play), produce a point (protodeclarative pointing), and make a tower of blocks. A 6-year follow-up study of >16,000 children screened with the CHAT at 18 months in the United Kingdom showed a sensitivity of only 0.40 and a specificity of 0.98, with a positive predictive value (PPV) of 0.26. Rescreening using the same instrument at 19 months for those who failed the 18-month screening yielded a higher PPV of 0.75. Therefore, children were likely to have autism if they failed the CHAT at 18 months and failed again at 19 months. It was estimated that consistent failure in 3 key questions (ie, protodeclarative pointing, gaze monitoring, and pretend play) at 18 months indicated an 83.3% risk of having autism. Because of

the poor sensitivity of the original CHAT for autism, a Modified Checklist for Autism in Toddlers (M-CHAT), consisting of 23 questions, with 9 questions from the original CHAT and an additional 14 questions addressing core symptoms present among young autistic children, was designed in the United States. The original observational part (ie, section B) was omitted. The M-CHAT was designed as a simple, self-administered, parental questionnaire for use during regular pediatric visits. The more questions children failed, the higher their risk of having autism. Two criteria were used to measure the sensitivity and specificity of M-CHAT. Criterion 1 used any 3 of the 23 questions, and criterion 2 used 2 of the 6 best questions that could be used to discriminate autism from other groups. The sensitivity and specificity for criterion 1 were 0.97 and 0.95 and those for criterion 2 were 0.95 and 0.99, respectively. M-CHAT had a better sensitivity than the original CHAT, because children up to 24 months of age were screened, with the aim of identifying those who might regress between 18 and 24 months. The 6 best questions of the M-CHAT addressed areas of social relatedness (interest in other children and imitation), joint attention (protodeclarative pointing and gaze monitoring), bringing objects to show parents, and responses to calling. Joint attention was addressed in the original CHAT, whereas the other areas were addressed only in the M-CHAT. To date, there has been no study of the application of either the original CHAT or the M-CHAT for Chinese populations. OBJECTIVES: CHAT-23 is a new checklist translated into Chinese, combining the M-CHAT (23 questions) with graded scores and section B (observational section) of the CHAT. We aimed to determine whether CHAT-23 could discriminate autism at mental ages of 18 to 24 months for Chinese children and to determine the best combination of questions to identify autism. METHODS: A cross-sectional cohort study was performed with 212 children with mental ages of 18 to 24 months. The children were categorized into 2 groups, ie, group 1 (N = 87) (autistic disorder: N = 53; pervasive developmental disorder: N = 33) and group 2 (N = 125) (nonautistic). The checklist included self-administered questionnaires with 23 questions (part A) and direct observations of 5 items by trained investigators (part B). We performed discriminant function analysis to We found that 7 key questions, addressing areas of joint attention, pretend play, social relatedness, and social referencing, were identified as discriminative for autism. For part A, failing any 2 of 7 key questions, ie, question 13 (does your child imitate you? [eg, you make a face; will your child imitate it?]), question 5 (does your child ever pretend, for example, to talk on the phone or take care of dolls, or pretend other things?), question 7 (does your child ever use his/her index finger to point, to indicate interest in something?), question 23 (does your child look at your face to check your reaction when faced with something unfamiliar?), question 9 (does your child ever bring objects over to you [parent] to show you something?), question 15 (if you point at a toy across the room, does your child look at it?), and question 2 (does your child take an interest in other children?), yielded sensitivity of 0.931 and specificity of 0.768. Failing any 6 of all 23 questions produced sensitivity of 0.839 and specificity of 0.848. For part B, failing any 2 of 4 items produced sensitivity of 0.736, specificity of 0.912, and PPV of 0.853. The 4 observational items were as follows: item B1: during the appointment, has the child made eye contact with you? item B2: does the child look across to see what you are pointing at? item B3: does the child pretend to pour out tea, drink it, etc?; item B4: does the child point with his/her index finger at the light? CONCLUSION: We found that integrating the screening questions of the M-CHAT (from the United States) and observational section B of the original CHAT (from the United Kingdom) yielded high sensitivity and specificity in discriminating autism at 18 to 24 months of age for our Chinese cohort. This new screening instrument (CHAT-23) is simple to administer. We found that a 2-stage screening program for autism can offer a cost-effective method for early detection of autism at 18 to 24 months. For CHAT-23, use of both the parental questionnaire and direct observation and use of the criterion of failing any 2 of 7 key questions yielded the highest sensitivity but a relatively lower specificity, whereas use of part B yielded the highest specificity but a lower sensitivity. We recommend identifying the possible positive cases with part A (parental questionnaire) and then proceeding to part B (observation) with trained assessors. The proposed algorithm for screening for autism is as follows. 1) The parents or chief caretakers complete a 23-item questionnaire when their children are 18 to 24 months of age. 2) The parents mail, fax, or hand this 23-item questionnaire to the local child health agency. 3) Clerical staff members check for and score failure, with the criteria of failing any 2 of 7 key questions or failing any 6 of 23 questions; if either criterion is met, then the staff members highlight the medical records of the suspicious cases. 4) Trained child health care professionals observe the children who failed any 2 of 7 key questions or any 6 of 23 questions. These identified patients are observed for 5 minutes for part B of the CHAT-23. 5) Any child who fails any 2 of 4 items requires direct referral to a comprehensive autism evaluation team, for early diagnostic evaluation and early intervention. The high sensitivity and specificity of the criteria observed in our study suggested that CHAT-23 might be used to differentiate children with autism. Additional international collaboration with the use of the CHAT, M-CHAT, and CHAT-23 could provide more prospective epidemiologic data, to establish whether there is a genuine increase in the worldwide incidence of autism

SN - 1098-4275

AD - Department of Paediatrics and Adolescent Medicine, University of Hong Kong, Hong Kong.  
vcnwong@hkucc.hku.hk

UR - 15286253

ER -

TY - JOUR

ID - 1387

T1 - Epidemiology of trauma in a population of incarcerated youth

A1 - Woolf,A.

A1 - Funk,S.G.

Y1 - 1985/03//

N1 - Woolf, A. Funk, S G

Pediatrics

oxv, 0376422

AIM, IM

Journal Article. Research Support, Non-U.S. Gov't

English

KW - Medline

KW - Rough and Tumble

KW - Adolescent

KW - Child

KW - Female

KW - Humans

KW - Juvenile Delinquency

KW - Male

KW - North Carolina

KW - Prisoners

KW - Time Factors

KW - Wounds and Injuries/ep [Epidemiology]

RP - NOT IN FILE

SP - 463

EP - 468

JA - Pediatrics

VL - 75

IS - 3

CY - UNITED STATES

N2 - This study assessed the types, circumstances, frequency, and health consequences of trauma suffered by juvenile delinquents at a secure residential training school. A review of 369 medical records of 387 teenagers, aged 10 to 17 years, admitted to one such facility between 1978 and 1982 was made. Of the 369 students, 191 students (52%) suffered 391 separate trauma incidents serious enough to require a health care provider's attention. Circumstances surrounding the injuries included sports (36%), fights (20%), self-inflicted injuries (13%), suicide attempts (9%), incidents related to vocational studies (8%), and horseplay (3%). The most common types of injuries were musculoskeletal trauma, scratches, bruises and lacerations, and fractures. The usual sites of injury were the extremities, head, or neck. More than 50% of trauma incidents required a physician's attention initially or in follow-up; 28% of the injured were referred to an off-campus facility; 21% necessitated radiologic or laboratory studies; 4% required hospitalization; and one student died. The average trauma rate for teenagers in this setting was 1.2 injuries per person per year; the average rate of hospitalizations for trauma was 0.04 hospitalizations per person per year. These data call for further studies of trauma morbidity among adolescents in this and other settings and for innovative trauma prevention strategies

SN - 0031-4005

UR - 3975115

ER -

TY - JOUR

ID - 1388

T1 - The Development and Tendency of Western Research on Children's Rough-and-Tumble Play. [Chinese]

A1 - Xinli,Zhang

Y1 - 2006///

N1 - Peer Reviewed Journal: 2006-07171-066

Chinese

Journal; Peer Reviewed Journal

KW - PsycInfo

KW - Rough and Tumble

KW - Childhood Development

KW - Childhood Play Behavior

KW - Experimentation

RP - NOT IN FILE

SP - Mar

EP - 498

JF - Psychological Science (China)

VL - .29

IS - 2

N2 - The origin, development, current situation and tendency of Western research on children's rough-and-tumble play were discussed. The concept, behavioural patterns, factors, and characteristics of children's age/gender etc. in rough-and-tumble play were expounded. The nature and function of rough-and-tumble play were also dealt with. The improving of methodology and expanding of research on children's rough-and-tumble play have been demonstrated. The integrative research of culture with ethological and psychological tradition is a new theoretical orientation, and presents a multidisciplinary research perspective. (PsycINFO Database Record (c) 2012 APA, all rights reserved) (journal abstract)

SN - 1671-6981

AD - Xinli, Zhang: Study Center of Education and Psychology of Ethnic Minorities in Southwest China, Southwest University, Chongqing, China

ER -

TY - JOUR

ID - 1389

T1 - Gender and environment as determinants of behavior in infant common baboons (*Papio cynocephalus*)

A1 - Young,G.H.

A1 - Bramblett,C.A.

Y1 - 1977/09//

N1 - Young, G H. Bramblett, C A

Archives of sexual behavior

8gr, 1273516

IM

Journal Article

English

KW - Medline

KW - Rough and Tumble

KW - Aggression

KW - Animals

KW - Newborn

KW - Behavior

KW - Animal

KW - Exploratory Behavior

KW - Female

KW - Haplorhini

KW - Humans

KW - Male

KW - Maternal Deprivation

KW - Motor Activity

KW - Papio

KW - Peer Group

KW - Play and Playthings

KW - Sex Factors

KW - Sexual Behavior

KW - Social Behavior

KW - Social Environment

KW - Species Specificity

KW - Stereotyped Behavior

KW - Vocalization

RP - NOT IN FILE

SP - 365

EP - 385

JF - Archives of Sexual Behavior

JA - Arch.Sex Behav

VL - 6

IS - 5

CY - UNITED STATES

N2 - Two groups of infant baboons were observed. The breast-fed group was housed in a gang cage with nursing mothers (n = 13) and the other motherless group was in a wire-cage nursery habitat (n = 20).

Differences in behavior due to gender and environment were tested by analysis of variance. The results do not support the hypothesis that innate sex differences exist in baboons aged 0-3 months. Nursery-reared subjects had significantly higher scores for rough-and-tumble play, stereotypy, threat, avoid, explore, high tension, and nonaggressive social behaviors, but these behaviors are not significantly different between sexes in either groups

SN - 0004-0002

UR - 411455

ER -

TY - JOUR

ID - 1390

T1 - Exploration, Play and Social Development in Boys and Girls

A1 - Smith,P.K.

Y1 - 1986///

N1 - Accession Number: SPH335574; Author: Smith, P.K. ; Language: English; References: 61; Database Subset: SR; Publication Type: Book Analytic; Update Code: 19940101; SIRC Article No.: 335574

KW - \*PLAY

KW - \*SEX role

KW - Child Development

KW - SEX FACTOR

KW - STEREOTYPE

KW - SportDiscus

KW - Rough and Tumble

RP - NOT IN FILE

N2 - Considers three broad stages in the development of gender understanding in children: gender identity and labelling, gender stability, and gender constancy or consistency. Looks at children's understanding of sex-role stereotypes. Reviews the observations of social scientists regarding differences in the social and play behaviours of boys and girls. Discusses both immediate causal and functional/evolutionary explanations for the existence of differing sex roles. Illustrates an interactive developmental model for a typically sex-typed behaviour, using the example of rough-and-tumble play

UR -

<https://login.proxy.bib.uottawa.ca/login?url=http://search.ebscohost.com/login.aspx?direct=true&db=s3h&AN=SPH335574&site=ehost-live;http://articles.sirc.ca/search.cfm?id=335574>

ER -

TY - JOUR

ID - 1391

T1 - Making work play

A1 - Bowman, J.R.

Y1 - 1987///

N1 - Accession Number: SPH206329; Author: Bowman, J.R. ; Conference: Association for the Anthropological Study of Play. Meeting (11th : 1985 : Washington, D.C.); Language: English; Parent Item: SPH203402; References: 29; Database Subset: SR; Publication Type: Book Analytic; Update Code: 19871201; SIRC Article No.: 206329

KW - \*PLAY

KW - WORK

KW - Interviews

KW - SURVEYS

KW - Anthropology

KW - WORK ethic

KW - Observation

KW - SportDiscus

KW - Rough and Tumble

RP - NOT IN FILE

JA - Association for the Anthropological Study of Play.Meeting (11th : 1985 : Washington, D.C.)

CY - ;

N2 - Examines the ways in which work and play are interwoven during the work process. Describes the dualistic concept of work and play found in American culture. Presents a number of examples of adult play (pranks, horseplay, mock insults) which occur in social settings where individuals are working. Notes that while some of these episodes of playing on the job interrupt the ongoing work process, other examples describe workers successfully turning work into play while managing to accomplish work objectives. Concludes that the traditional way of viewing play and work as separate, polarized entities is far too simple, and that play and work must be seen as interactional events

UR -

<https://login.proxy.bib.uottawa.ca/login?url=http://search.ebscohost.com/login.aspx?direct=true&db=s3h&AN=SPH206329&site=ehost-live;http://articles.sirc.ca/search.cfm?id=206329>

ER -

TY - JOUR

ID - 1392

T1 - Should Horses 'Play' With Humans?

A1 - HAUG, LORE I.

Y1 - 2013/05//

N1 - Accession Number: 86857188; Author: HAUG, LORE I.: 1 ; Author Affiliation: 1 Texas Veterinary Behavior Services, Sugar Land, Texas; No. of Pages: 2; Language: English; Publication Type: Journal Article; Update Code: 20130410

KW - \*HORSES -- Behavior

KW - \*PLAY

KW - HUMAN-animal relationships

KW - SportDiscus

KW - Rough and Tumble

RP - NOT IN FILE

SP - 14

EP - 15

JA - Horse & Rider

VL - 52

IS - 5

N2 - The article provides an answer to a question of the playing behavior of horses with humans

SN - 00185159

UR -

<https://login.proxy.bib.uottawa.ca/login?url=http://search.ebscohost.com/login.aspx?direct=true&db=s3h&AN=86857188&site=ehost-live>

ER -

TY - JOUR

ID - 1393

T1 - Vertigo and social structure: notes on Hausa children's play

A1 - Olofson,H.

Y1 - 1977///

N1 - Accession Number: SPH67628; Author: Olofson, H. ; Conference: Association for the Anthropological Study of Play. Annual Meeting, 2d, Atlanta, 1976.; Language: English; Parent Item: SPH67617; References: 10; Database Subset: SR; Publication Type: Book Analytic; Update Code: 19940901; SIRC Article No.: 67628

KW - \*GAMES

KW - \*PLAY

KW - Societies

KW - Culture

KW - SOCIAL structure

KW - NIGERIA

KW - Child

KW - HAUSA

KW - SportDiscus

KW - Rough and Tumble

RP - NOT IN FILE

CY - ;

N2 - Data on the rough play of male children was elicited from an informant of the walled city of Zaria who had experienced such play himself. Provides notes on competitive games which (contrary to the assumptions of Caillouis) have a strong component of vertigo. The function of vertigo and related play-symbols is analyzed as a factor in the socialization of male children into the Hausa world of social relations where there must be respect for age, strength, and superior social position. Vertigo in these examples is further explored in terms of a value for social and physical balance or stability which extends throughout Hausa culture

UR -

<https://login.proxy.bib.uottawa.ca/login?url=http://search.ebscohost.com/login.aspx?direct=true&db=s3h&AN=SPH67628&site=ehost-live;http://articles.sirc.ca/search.cfm?id=67628>

ER -

TY - JOUR

ID - 1394

T1 - On Roughhousing and Throwing Your Children Around

A1 - Rader,Rick

Y1 - 2011/07//

N1 - Accession Number: 2011243768. Language: English. Entry Date: 20110909. Revision Date: 20140117. Publication Type: journal article; editorial. Journal Subset: Consumer Health; USA. Special Interest: Consumer Health; Pediatric Care. NLM UID: 7702637

KW - Serial Publications

KW - Parents of Disabled Children

KW - Play and Playthings -- Psychosocial Factors

KW - Child,Disabled -- Psychosocial Factors

KW - Child Development

KW - Parent-Child Relations

KW - Attitude to Disability

KW - CINAHL

KW - Rough and Tumble

RP - NOT IN FILE

SP - 4

EP - 4

JA - Exceptional Parent

VL - 41

IS - 7

SN - 0046-9157



UR - <http://search.ebscohost.com/login.aspx?direct=true&db=cin20&AN=2011243768&site=ehost-live>  
ER -

TY - JOUR

ID - 1395

T1 - Rough Play: One of the Most Challenging Behaviors

A1 - Carlson,Frances M.

Y1 - 2011/07//

N1 - Last updated - 2012-12-14

SubjectsTermNotLitGenreText - 7940 126; 3085 3150; 916 8234; 11655 1474 316 8016 4542; 1432 909; 9254 7970; 10342 153 4398; 9017 6752 9651 6582 8016 4542; 10565 9015; 9753 5053 2787; 2221 909; 7676 5449 8768

KW - ERIC,Current Index to Journals in Education (CIJE)

KW - Early Childhood Education

KW - Preschool Education

KW - Teacher Role

KW - Play

KW - Child Behavior

KW - Young Children

KW - Cooperation

KW - Role Models

KW - Behavior Problems

KW - Peer Relationship

KW - School Policy

KW - Social Development

KW - Supervision

KW - ERIC

KW - Rough and Tumble

RP - NOT IN FILE

SP - 18

EP - 25

JF - Young Children

VL - 66

IS - 4

PB - National Association for the Education of Young Children. 1313 L Street NW Suite 500, Washington, DC 22205-4101.

N2 - Most children engage in rough play, and research demonstrates its physical, social, emotional, and cognitive value. Early childhood education settings have the responsibility to provide children with what best serves their developmental needs. One of the best ways teachers can support rough play is by modeling it for children. When adults model high levels of vigorous activity, the children in their care are more likely to play this way. Children also play more vigorously and more productively when their teachers have formal education or training in the importance of this type of play. Besides modeling, teachers can do three specific things to provide for and support rough play while minimizing the potential for injury: (1) prepare both the indoor and outdoor environment; (2) develop and implement policies and rules for rough play; and (3) supervise rough play so they can intervene when appropriate. When children successfully participate in big body play, it is "a measure of the children's social well-being and is marked by the ability of children to cooperate, to lead, and to follow." These abilities don't just support big body play; these skills are necessary for lifelong success in relationships

SN - 1538-6619, 1538-6619

UR - <http://search.proquest.com/docview/1011399329?accountid=14701>

ER -

TY - JOUR

ID - 1396

T1 - Observing Young Children's Rough-and-Tumble Play

A1 - Tannock,Michelle

Y1 - 2011/06//

N1 - Last updated - 2012-12-14

SubjectsTermNotLitGenreText - 7940 126; 11655 1474 316 8016 4542; 4290; 1443 5053 2787; 3085 3150; 1432 909; 7234; 2798; 1433 9806 4911 9556; 4109 4335; 1699 1595 7404

KW - Canada

KW - ERIC,Current Index to Journals in Education (CIJE)

KW - Early Childhood Education

KW - Coding

KW - Foreign Countries

KW - Play

KW - Child Behavior

KW - Young Children

KW - Gender Differences

KW - Developmental Stages

KW - Child Development

KW - Child Care

KW - Observation

KW - ERIC

KW - Rough and Tumble

RP - NOT IN FILE

SP - 13

EP - 20

JF - Australasian Journal of Early Childhood

VL - 36

IS - 2

PB - Early Childhood Australia. P.O. Box 7105, Watson, ACT 2602, Australia. Tel: +61-2-6242-1800; Fax: +61-2-6242-1818; e-mail: [publishing@earlychildhood.org.au](mailto:publishing@earlychildhood.org.au); Web site:

<http://www.earlychildhoodaustralia.org.au>

N2 - This research investigated the rough-and-tumble play of 17 five-year-old children in two early childhood settings. The study resulted in an increased understanding of the forms of rough-and-tumble play displayed by young children. This study demonstrates that both boys and girls are engaged in a variety of rough-and-tumble play behaviours. Twenty-seven distinct rough-and-tumble play behaviours were exhibited during the observation period. They included eight components identified as rough-and-tumble play in previous research and also 19 behaviours not previously identified as elements of such. These elements indicate pre-operational forms of rough-and-tumble play. The results of this study have implications for the understanding of child development. It suggests that rough-and-tumble play evolves as children age; that children move into more complex play behaviours as they mature. (Contains 2 tables and 1 figure.)

SN - 1836-9391, 1836-9391

UR - <http://search.proquest.com/docview/1031154668?accountid=14701>

ER -

TY - JOUR

ID - 1397

T1 - Evolutionary Functions of Social Play: Life Histories, Sex Differences, and Emotion Regulation

A1 - LaFreniere,Peter

Y1 - 2011///

N1 - Last updated - 2013-02-26

SubjectsTermNotLitGenreText - 7940 126; 7782; 1446 4634; 4290; 3395 8930 909; 9457 909; 520; 1474 316 8016 4542; 990 6113 7104 8371 6120 4918 5964; 6124 8477; 1459; 9753 5053 2787; 1858 9690 1; 925 8836

KW - ERIC,Current Index to Journals in Education (CIJE)

KW - Animals

KW - Play

KW - Gender Differences

KW - Child Health

KW - Perspective Taking

KW - Literature Reviews

KW - CHILDREN  
KW - Communication Skills  
KW - Biographies  
KW - Child Rearing  
KW - Social Development  
KW - Emotional Response  
KW - Self Control  
KW - Behavioral Science Research  
KW - ERIC  
KW - Rough and Tumble  
RP - NOT IN FILE  
SP - 464  
EP - 488  
JF - American Journal of Play  
VL - 3  
IS - 4  
PB - The Strong. One Manhattan Square, Rochester, NY 14607.  
N2 - Many research findings about animal play apply to children's play, revealing structural and functional similarities with mammals in general and primates in particular. After an introduction to life-history theory, and before turning to humans, the author reviews research about the two mammals in which play has been studied the most extensively: laboratory rats and monkeys. He looks at the development of play, deprivation studies, gender segregation, and the functions of gender-differentiated forms of play. The gender segregation and sex differences in play parenting and rough-and-tumble play observed in many primates are also evident in children. Vigorous social-play benefits all children physically by developing strong bones and muscles, by promoting cardiovascular fitness, and by encouraging exercise habits that help prevent obesity. Unsupervised play also helps hone the skills of communication, perspective taking, and emotion regulation. For boys especially, rough-and-tumble play in early childhood provides a scaffold for learning emotion-regulation skills related to managing anger and aggression  
SN - 1938-0399, 1938-0399  
UR - <http://search.proquest.com/docview/1312421090?accountid=14701>  
ER -  
  
TY - BOOK  
ID - 1398  
T1 - The Oxford Handbook of the Development of Play. First Edition. Oxford Library of Psychology  
A1 - Pellegrini,Anthony D.  
Y1 - 2010/11//  
N1 - Last updated - 2012-12-14  
KW - ERIC,Resources in Education (RIE)  
KW - Parents  
KW - Teachers  
KW - Policymakers  
KW - Cultural Context  
KW - Learning  
KW - Play  
KW - Primatology  
KW - Gender Differences  
KW - Research Methodology  
KW - Personality  
KW - Observation  
KW - Peer Relationship  
KW - History  
KW - Parent Child Relationship  
KW - Educational Policy  
KW - Theories  
KW - Child Development

KW - Cultural Differences

KW - Games

KW - Interpersonal Relationship

KW - Autism

KW - Evolution

KW - Playground Activities

KW - ERIC

KW - Rough and Tumble

RP - NOT IN FILE

SP - 408

PB - Oxford University Press. 198 Madison Avenue, New York, NY 10016.

N2 - The role of play in human development has long been the subject of controversy. Despite being championed by many of the foremost scholars of the twentieth century, play has been dogged by underrepresentation and marginalization in literature across the scientific disciplines. "The Oxford Handbook of the Development of Play" marks the first attempt to examine the development of children's play through a rigorous and multidisciplinary approach. Comprising chapters from the foremost scholars in psychology, anthropology, and evolutionary biology, this handbook resets the landscape of developmental science and makes a compelling case for the benefits of play. Edited by respected play researcher Anthony D. Pellegrini, "The Oxford Handbook of the Development of Play" is both a scientific accomplishment and a shot across the bow for parents, educators, and policymakers regarding the importance of children's play in both development and learning. This book comprises 24 specially-commissioned chapters by the leading psychologists, anthropologists, and evolutionary biologists in the field of play. It discusses human play from an ethological perspective, examining its ontogeny, phylogeny (especially across primate species), proximal factors and functions. It also emphasizes the importance of play in the debate over the role of recess in the school curriculum. It is divided into seven parts. Part I, Introduction and Overview, contains the following: (1) Introduction (Anthony D. Pellegrini). Part II, Definitions, contains the following: (2) Defining and Recognizing Play (Gordon M. Burghardt); and (3) Cultural Variations in Beliefs about Play, Parent-Child Play, and Children's Play: Meaning for Childhood Development (Jaipaul L. Roopnarine). Part III, Theories, contains the following: (4) Theories of Play (Patrick Bateson); (5) Comparing and Extending Piaget's and Vygotsky's Understandings of Play: Symbolic play as Individual, Sociocultural, and Educational Interpretation (Artin Goncu and Suzanne Gaskins); (6) Gene X Environment Interactions and Social Play: Contributions from Rhesus Macaques (Khalisa N. Herman, Annika Paukner, and Stephen J. Suomi); (7) Playing at Every Age: Modalities and Potential Functions in Non-Human Primates (Elisabetta Palagi); (8) Play and Development (Robert M. Fagen); (9) The History of Children's Play in the United States (Howard P. Chudacoff); and (10) The Antipathies of Play (Brian Sutton-Smith). Part IV, Methods, contains the following: (11) The Cultural Ecology of Play: Methodological Considerations for Studying Play in Its Everyday Contexts (Jonathan R. H. Tudge, Jill R. Brown, and Lia B. L. Freitas); and (12) Observational Methods in Studying Play (Peter K. Smith). Part V, Dimensions of Play, contains the following: (13) Object Play and Tool Use: Developmental and Evolutionary Perspectives (David F. Bjorklund and Amy K. Gardiner); (14) The Development and Function of Locomotor Play (Anthony D. Pellegrini); (15) Not Just "Playing Alone": Exploring Multiple Forms of Nonsocial Play in Childhood (Robert J. Coplan); (16) Internalizing and Externalizing Disorders during Childhood: Implications for Social Play (David Schwartz and Daryaneh Badaly); (17) Gender and Temperament in Young Children's Social Interactions (Carol Lynn Martin, Richard A. Fabes, Laura D. Hanish); (18) Social Play of Children with Adults and Peers (Carollee Howes); (19) Rough-and-Tumble Play: Training and Using the Social Brain (Sergio M. Pellis and Vivien C. Pellis); (20) Children's Games and Playground Activities in School and Their Role in Development (Ed Baines and Peter Blatchford); (21) Mother-Child Fantasy Play (Angeline S. Lillard); (22) Origins and Consequences of Social Pretend Play (Robert D. Kavanaugh); (23) The Development of Pretend Play in Autism (Christopher Jarrold and Carmel Conn); and (24) Technology and Play (Jeffrey Goldstein). Part VI, Education, contains the following: (25) Playing around in School: Implications for Learning and Educational Policy (Kelly Fisher, Kathy Hirsh-Pasek, Roberta M. Golinkoff, Dorothy G. Singer, and Laura Berk). Finally, Part VII contains a conclusion by Anthony D. Pellegrini

SN - 0195393007

UR - <http://search.proquest.com/docview/881462654?accountid=14701>

ER -

TY - JOUR

ID - 1399

T1 - Preschool Teachers' Views of Active Play

A1 - Logue, Mary Ellin

A1 - Harvey, Hattie

Y1 - 2010///

N1 - Last updated - 2013-02-26

SubjectsTermNotLitGenreText - 2521 3184 2787; 7940 126; 10511 8331; 3005 9021 9651 6582; 3085 3150; 8135 10591 8267 3417 8016 4542 5703 4908 8917; 4290; 8127 11655 1474 316 8016 4542; 10576 5449 8768; 10579 10380 3629 6582; 10482 730; 8535 6447; 1432 909; 10183 909; 8466 4403 3417 8016 4542 5703 4908 8917 10591 8267; 8467 9306 5241; 10087 2574 3629 6582

KW - United States (Northeast)

KW - ERIC, Current Index to Journals in Education (CIJE)

KW - Early Childhood Education

KW - Preschool Education

KW - Preschool Teachers

KW - Teacher Student Relationship

KW - Questionnaires

KW - Play

KW - Child Behavior

KW - Gender Differences

KW - Dramatic Play

KW - Teacher Attitudes

KW - Public School Teachers

KW - Teacher Surveys

KW - Public Schools

KW - Curriculum Development

KW - Statistical Analysis

KW - Student Behavior

KW - Preschool Children

KW - Teacher Education Programs

KW - ERIC

KW - Rough and Tumble

RP - NOT IN FILE

SP - 32

EP - 49

JF - Journal of Research in Childhood Education

VL - 24

IS - 1

PB - Routledge, 325 Chestnut Street Suite 800, Philadelphia, PA 19106.

N2 - This study surveyed 98 teachers of 4-year-olds about dramatic play in their classrooms and about their attitudes and practices about rough-and-tumble play. Gender differences emerged in the nature of dramatic play reported and in the ways in which teachers interacted with children engaged in different forms of dramatic play. Teachers also reported their coursework in early childhood education as the greatest influence on their beliefs and attitudes about rough-and-tumble play. The findings have implications for curriculum planning, school behavior policies, and teacher education programs. (Contains 3 tables and 5 figures.)

SN - 0256-8543, 0256-8543

UR - <http://search.proquest.com/docview/881454279?accountid=14701>

ER -

TY - JOUR

ID - 1400

T1 - Rough and Tumble Play 101

A1 - Carlson, Frances

Y1 - 2009///

N1 - Last updated - 2012-12-14

SubjectsTermNotLitGenreText - 7940 126; 3899 8415; 6725; 8684; 7676 5449 8768; 83 8168; 324 545 9738 909; 3190 3518; 10565 9015; 7840 126; 1443 5053 2787

KW - ERIC,Current Index to Journals in Education (CIJE)

KW - Teacher Role

KW - Physical Activities

KW - Educational Environment

KW - Misconceptions

KW - Play

KW - Fear

KW - Child Development

KW - Recess Breaks

KW - Aggression

KW - Accident Prevention

KW - Peer Relationship

KW - ERIC

KW - Rough and Tumble

RP - NOT IN FILE

SP - 70

EP - 72

JF - Exchange: The Early Childhood Leaders' Magazine Since 1978

IS - 188

PB - Exchange Press, P.O. Box 3249, Redmond, WA 98073-3249.

N2 - Many people fear that play-fighting or rough and tumble play is the same as real fighting. There is also a fear that this rough play will become real fighting if allowed to continue. Most of all, parents and teachers fear that during the course of rough and tumble play a child may be hurt. To provide for and allow children to play rough without injury, teachers need to understand how rough play is different from aggression, as well as about how to offer it in a safe and supportive environment. For young children, rough and tumble play is seemingly universal and dates back to the 12th century (Jarvis, 2007). This style of play incorporates a range of physical behaviors that range from running and chasing to tagging and wrestling. The author discusses the significance of rough and tumble play and outlines the physical benefits of rough and tumble play and its policies and rules

SN - 0164-8527, 0164-8527

UR - <http://search.proquest.com/docview/61842162?accountid=14701>

ER -

TY - JOUR

ID - 1401

T1 - Play Teaches What Testing Can't Touch: Humanity

A1 - Chmelynski,Carol

Y1 - 2006/11//

N1 - Last updated - 2012-12-14

SubjectsTermNotLitGenreText - 28 96; 9457 909; 2462 10120; 7847 5053 2787; 7223 1096 7843 5051 2923 2877 1088; 1485; 7940 126; 9769 5127; 8684; 9274 9126 7921; 3390 5333 8409 5051; 5446 1970 1

KW - Oregon

KW - ERIC,Current Index to Journals in Education (CIJE)

KW - Elementary Education

KW - Social Influences

KW - Obesity

KW - Play

KW - School Schedules

KW - Academic Achievement

KW - Recess Breaks

KW - Physical Development

KW - Emotional Intelligence

KW - Interpersonal Competence

KW - Cues

KW - Childrens Rights

KW - Self Control

KW - ERIC

KW - Rough and Tumble

RP - NOT IN FILE

SP - 10

EP - 13

JF - Education Digest: Essential Readings Condensed for Quick Review

VL - 72

IS - 3

PB - Prakken Publications. 832 Phoenix Drive, P.O. Box 8623, Ann Arbor, MI 48108.

N2 - Pressures to improve test scores and avoid lawsuits are causing many schools to cut back play time.

According to the American Association for the Child's Right to play, nearly 40% of the nation's 16,000 school districts have either modified, deleted, or are considering deleting recess. Moreover, where playtime does still exist, it has become overly safe and highly predictable. But according to experts, play makes children more resistant to chronic illnesses since they become more physically active and fit. Also, rough-and-tumble play is how kids learn social skills, how they learn to inhibit aggression, and how to recognize aggressive facial cues. Lack of playtime increasing regulation of what playtime does exist contributes to the childhood obesity crisis, harms children by removing an outlet for creativity, and is a factor in impulse control problems like ADHD (attention deficit hyperactivity disorder)

SN - 0013-127X, 0013-127X

UR - <http://search.proquest.com/docview/62019083?accountid=14701>

ER -

TY - BOOK

ID - 1402

T1 - The Excellence of Play. Second Edition

A1 - Moyles,Janet

Y1 - 2005/08//

N1 - Last updated - 2012-12-14

KW - ERIC,Resources in Education (RIE)

KW - Students

KW - Practitioners

KW - Early Childhood Education

KW - Science Education

KW - Teacher Role

KW - Toddlers

KW - Class Activities

KW - Language Acquisition

KW - Play

KW - Young Children

KW - Special Needs Students

KW - Gender Differences

KW - Role Playing

KW - Educational Needs

KW - Music Education

KW - Mathematics Education

KW - Art Education

KW - Physical Activities

KW - Story Telling

KW - Student Evaluation

KW - Literacy

KW - Learning Strategies

KW - Infants

KW - ERIC

KW - Rough and Tumble

RP - NOT IN FILE

SP - 320

PB - Open University Press. The McGraw-Hill companies, Order Services, P.O. Box 182605, Columbus, OH 43218-2605.

N2 - This second edition of "The Excellence of Play" encapsulates all of the many changes that have taken place in early childhood in the last decade. It examines the vital importance of play as a tool for learning and teaching for children and practitioners, supporting all those who work in early childhood education and care in developing and implementing the highest quality play experiences for young children. All the contributors are experts in their fields and all are passionate about the excellence of play. While the importance of curriculum and assessment is retained and extended, this edition features many new contributions, including: Children as social and active agents in their own play; More background to current research on play theory and practice; Practitioners' roles in play and adults' enabling of play; Links with the Foundation Stage (including legislation and policy); Links with the first years of school and beyond Outdoor and physical play, including rough and tumble; Gender differences; Play and observation/assessment; Special Educational Needs and play. This book provides a powerful argument that a curriculum which sanctions and utilizes play is more likely to provide well-balanced citizens of the future, as well as happier and more learned children in the present. Following a foreword by Iram Siraj-Blatchford; and an introduction by Janet Moyles this book is divided into four parts. Part One, Setting the Play Context, contains the following chapters: (1) Play and Legislated Curriculum: Back to Basics--An Alternative View (Angela Anning); (2) Learning to Play, Playing to Learn--Babies and Young Children Birth to Three (Ann Langston and Lesley Abbott); and (3) Play and Special Needs (Theodora Papatheodorou). Part Two, Play, Language, and Literacy Development, continues with the following chapters: (4) Play, Storytelling and Creative Writing (David Whitebread and Helen Jameson); (5) Open-Ended Role Play: Supporting Creativity and Developing Identity (Pat Broadhead and Carey English); (6) Play, Literacy and Situated Learning (Nigel Hall); (7) Story-Making, Play and Gender (Jane Hislam); and (8) Fantasy Play and the Case for Adult Intervention (Neil Kitson). Part Three, Play and the Curriculum, presents the next six chapters: (9) Play Activity and Rough and Tumble Play (Peter K. Smith); (10) Outdoor Play and the Pedagogic Garden (Stephanie Harding); (11) Science and Play (Alan Howe and Dan Davies); (12) Mathematics and Play (Rose Craven Griffiths); (13) Art in the Early Years (Bernadette Duffy); and (14) Playing Music (Linda Pound). Part Four, Play Culture and Playful Practitioners, presents the final chapters: (15) Practitioners and Play: Reflecting in a Different Way (Sian Adams); (16) The Importance of Play in the Transition to School (Hilary Fabian and Aline-Wendy Dunlop); (17) Play in the Early Years: The Influence of Cultural Difference (Tricia David and Sacha Powell); and (18) Play, the Universe and Everything! (Tina Bruce). The book concludes with an afterword by Janet Moyles; and a list of references. [For the first edition of this book, see ED377984.]

SN - 0335217583

UR - <http://search.proquest.com/docview/62087367?accountid=14701>

ER -

TY - GEN

ID - 1403

T1 - Shaken Baby Syndrome: What Caregivers Need To Know

A1 - Wiggins,Paula

Y1 - 2000///

N1 - Last updated - 2012-12-14

KW - Shaken Baby Syndrome

KW - ERIC,Current Index to Journals in Education (CIJE)

KW - Play

KW - Parent Child Relationship

KW - Infant Behavior

KW - Child Caregivers

KW - Child Health

KW - Brain

KW - Crying

KW - Child Abuse

KW - Violence

KW - Infants

KW - ERIC



KW - Rough and Tumble

RP - NOT IN FILE

SP - 16

EP - 19

JF - Texas Child Care

VL - 23

IS - 4

N2 - Discusses the causes of shaken baby syndrome and how to recognize, respond to, and prevent it. Identifies horseplay to avoid and recommends never shaking baby even for apnea. Offers 12 tips for working with crying babies and includes ten discussion questions to test knowledge of the syndrome. (DLH)

UR - <http://search.proquest.com/docview/62334008?accountid=14701>

ER -

TY - GEN

ID - 1404

T1 - Child's Play: A Work-Family Issue

A1 - Kuchner,Joan F.

Y1 - 1998/04//

N1 - Availability - Level 1 - Available online, if indexed January 1993 onward

SuppNotes - Paper presented at the Annual National Coalition for Campus Children's Centers Conference (St. Louis, MO, April 1-4, 1998)

Last updated - 2012-12-14

KW - Daily Routines

KW - Family Activities

KW - Play Learning

KW - ERIC,Resources in Education (RIE)

KW - Preschool Education

KW - Preschool Teachers

KW - Play

KW - Parent Child Relationship

KW - Child Rearing

KW - Stress Management

KW - Preschool Children

KW - Parents

KW - ERIC

KW - Rough and Tumble

RP - NOT IN FILE

SP - 8

N2 - Many parents find that the daily stress of coping with the demanding realities of their work lives leaves them with little personal and family time; playing with their children may therefore fall to the bottom of the "to-do list." One of the tasks of early childhood professionals thus becomes helping parents understand the nature and value of play and guiding them toward an appreciation of how playful parent-child interactions may assist parents in reaching their own goals. This paper provides information for early childhood professionals to use toward that end. The paper discusses the role of play as: (1) part of a time management strategy to build relationships with their children, encouraging their success and their health--thereby meeting long-term goals; (2) reducing stress for parents and children; (3) facilitating school readiness; (4) nurturing communication skills that are part of emotional intelligence; (5) providing an avenue for emotional expression; (6) nourishing to the parent-child relationship; and (7) providing the basis for positive discipline, preventing power struggles. The paper concludes that by providing a forum for exploring ways to fit play into found time, early childhood professionals can help parents plan home environments to encourage play and realize how play can smooth rough spots in routines. (KB)

UR - <http://search.proquest.com/docview/62377802?accountid=14701>

ER -

TY - GEN

ID - 1405

T1 - Dealing with Hitting and Aggression in the Classroom

A1 - Saifer,Steffen

Y1 - 1996///

N1 - Last updated - 2012-12-14

KW - Hitting Behavior (Aggression)

KW - Rough and Tumble Play

KW - Toy Guns

KW - War Games (Children)

KW - War Toys

KW - ERIC,Current Index to Journals in Education (CIJE)

KW - Early Childhood Education

KW - Play

KW - Classroom Environment

KW - Change Strategies

KW - Discipline

KW - Aggression

KW - Behavior Problems

KW - Classroom Techniques

KW - ERIC

KW - Rough and Tumble

RP - NOT IN FILE

SP - 37

EP - 39

JF - NHSA Journal

VL - 15

IS - 1

N2 - Notes that while hitting-aggressive behavior is probably the greatest single behavior concern of teachers, children can be taught appropriate behavior for the classroom. Offers tips for dealing with: roughhousing; existing problems; grabbing toys; and war games, guns, or violent play. Suggests allowing children the choice of an alternative activity rather than employing "time out." (TJQ)

UR - <http://search.proquest.com/docview/62691245?accountid=14701>

ER -

TY - GEN

ID - 1406

T1 - Play: An Intergenerational Experience. Proceedings of IPA/USA, The American Affiliate of the International Association for the Child's Right To Play 1995 National Conference (Birmingham, Alabama, August 24-27, 1995)

A1 - Guddemi,Marcy

Y1 - 1996///

N1 - Availability - Level 3 - Indexed only

Last updated - 2012-12-14

KW - Historical Influences

KW - Play Theory

KW - Playground Design

KW - United Kingdom

KW - ERIC,Resources in Education (RIE)

KW - Teacher Role

KW - Kindergarten Children

KW - Reminiscence

KW - Play

KW - Intergenerational Programs

KW - CHILDREN

KW - Physical Education

KW - Foreign Countries

KW - Playgrounds

KW - Parent Child Relationship

KW - Childrens Rights

KW - Pretend Play

KW - ERIC

KW - Rough and Tumble

RP - NOT IN FILE

SP - 96

PB - Southern Early Childhood Association, P.O. Box 55930, Little Rock, AR 72215-5930 (SECA members, \$8; Non-members, \$9).

N2 - These proceedings contain reprints of 26 papers presented at the 1995 IPA/USA (The American Affiliate of the International Association for the Child's Right to Play) national conference. The aim of the conference was to bring professional and public awareness to intergenerational needs and models with regard to children's development and play environments. The proceedings are presented in five sections: (1)

"Historical/Reflections," including papers on intergenerational support for play, memories of the elderly regarding play, and how intergenerational play differs in the 1920s, the 1950s, and the 1990s; (2) "Schools," including papers on teachers' role on the playground, kindergarten children's initial physical education experiences, and youngsters' construction of physical knowledge on swings; (3) "Home and Community," including papers on hospital play, parents and children as play partners, and planning and implementing a community play day; (4) "Design," including papers on community playgrounds, community-built gardens, and children's participation in designing outdoor play spaces; and (5) "Issues," including papers on rough and tumble play, playground safety, political action, and learning from programs in the United Kingdom. Each section is preceded by an introduction describing highlights of the articles in that section. Each article concludes with biographical information on the author(s). (KDFB)

SN - 0942388232

UR - <http://search.proquest.com/docview/62580265?accountid=14701>

ER -

TY - GEN

ID - 1407

T1 - Building in Opportunities for Gross Motor Development

A1 - Olds, Anita Rui

Y1 - 1994///

N1 - Last updated - 2012-12-14

KW - Play Learning

KW - Playground Equipment

KW - ERIC, Current Index to Journals in Education (CIJE)

KW - Early Childhood Education

KW - Physical Activities

KW - Learning

KW - Play

KW - Motor Development

KW - Special Needs Students

KW - Playgrounds

KW - Inservice Teacher Education

KW - Psychomotor Skills

KW - Playground Activities

KW - Physical Activity Level

KW - ERIC

KW - Rough and Tumble

RP - NOT IN FILE

SP - 31

EP - 50

JF - Child Care Information Exchange

IS - 97

N2 - This special training section includes four articles on the importance of movement and action to children's development. The articles are "From Cartwheels to Caterpillars: Children's Need to Move Indoors and Out";

"Kids Gotta Move: Adapting Movement Experiences for Children with Differing Abilities"; "Roughhousing as a Style of Play"; and "Moving Teachers to Move Children." (TJQ)

UR - <http://search.proquest.com/docview/62818479?accountid=14701>

ER -

TY - GEN

ID - 1408

T1 - Playful Teaching Workshop Sampler. Classroom Play Ideas for Early Childhood Educators

A1 - Battista, Donna

Y1 - 1994///

N1 - Availability - Level 1 - Available online, if indexed January 1993 onward

SuppNotes - Presented at the Annual Meeting of the Midwest Association for the Education of Young Children (Peoria, IL, April 20-23, 1994)

Last updated - 2012-12-14

KW - ERIC, Resources in Education (RIE)

KW - Teachers

KW - Practitioners

KW - Early Childhood Education

KW - Movement Education

KW - Physical Activities

KW - Play

KW - Class Activities

KW - Perceptual Development

KW - Piagetian Theory

KW - Cognitive Style

KW - ERIC

RP - NOT IN FILE

SP - 25

PB - Animated Learning Systems, 1110 Cross Creek, Valparaiso, IN 46383-2030 (\$8).

N2 - Based on Piaget's theory "children learn best by doing," play offers a natural way of learning for young children. The "Playful Teaching" Workshop Sampler offers teachers several different movement activities for incorporation into academic classroom curricula. The play ideas were presented at national and regional teaching workshops. The publication concludes with the author's views on why high quality play curricula promote academic readiness for early learners. It is argued that purposeful play provides an effective avenue for advancing sensory and perceptual motor development and allows young children to begin to visualize learning as fun and to see themselves as capable learners. Play addresses the needs of all kinds of learners...the kinesthetic child, the tactile child, the auditory child, and the visual child. Different learning styles are encouraged through the freedom of playful movement activity. This sampler, organized into four sections, shares play ideas relating to: (1) the movement pattern of a snake; (2) the movement pattern of a horse; (3) basic balance concepts; and (4) ball manipulation. Each of the 20 activities provided includes descriptions of both necessary equipment and procedures. (LL)

UR - <http://search.proquest.com/docview/62569413?accountid=14701>

ER -

TY - RPRT

ID - 1409

T1 - A Descriptive Study of Multicultural Elementary Student Playground Behaviors and Their Relationship to Gender, Age, Race and Socioeconomic Status

A1 - Dahmes, Victoria M.

Y1 - 1993/11//

N1 - Availability - Level 1 - Available online, if indexed January 1993 onward

SuppNotes - Paper presented at the Annual Meeting of the Mid-South Educational Research Association (New Orleans, LA, November 10-12, 1993)

Last updated - 2012-12-14

KW - ERIC, Resources in Education (RIE)

KW - Elementary Education

KW - Elementary School Students

KW - Play

KW - Child Behavior

KW - Blacks

KW - Teacher Attitudes

KW - Ethnography

KW - Peer Relationship

KW - Whites

KW - Cross Cultural Studies

KW - Hispanic Americans

KW - Sex Differences

KW - Cultural Differences

KW - Asian Americans

KW - Interpersonal Relationship

KW - Age Differences

KW - Playground Activities

KW - ERIC

KW - Rough and Tumble

RP - NOT IN FILE

SP - 34

N2 - This paper examines the observable play behaviors of elementary school students to determine how children interact within and among cultural groups. Observations were conducted during the recess period at an urban elementary school attended by 623 boys and girls age 6 through 12. Recess periods and play areas were segregated by grade and sex. Data were collected through observations of playground behaviors and interviews of playground duty teachers. Results indicated that boys tended to engage in more rough and tumble play, whereas girls tended to engage in more passive activities such as jumping rope. Older boys tended to exclude younger boys from games they were playing, whereas older girls tended to include younger girls in their activities. Asian students kept to themselves more than any other group, often excluding non-Asians from their activities. Blacks, Hispanics, and Whites tended to mix freely and play in non-segregated groups. (MDM)

UR - <http://search.proquest.com/docview/62803731?accountid=14701>

ER -

TY - RPRT

ID - 1410

T1 - Early Play Arousal, Sex-Typed Play, and Activity Level as Precursors to Later Rough-and-Tumble Play

A1 - Bride-Chang,Catherine

A1 - Jacklin,Carol Nagy

Y1 - 1993///

N1 - Last updated - 2012-12-14

KW - ERIC,Current Index to Journals in Education (CIJE)

KW - Early Childhood Education

KW - Sex Role

KW - Play

KW - Young Children

KW - Parent Child Relationship

KW - Physical Activity Level

KW - ERIC

KW - Rough and Tumble

RP - NOT IN FILE

SP - 99

EP - 108

N2 - The extent of father's participation in rough-and-tumble (R&T) play with their children when the children were 18 months old, and children's early preferences for play sex-typed as boys' play, were related to levels of children's R&T play in first grade. (MDM)

UR - <http://search.proquest.com/docview/62871270?accountid=14701>

ER -

TY - JOUR

ID - 1411

T1 - Commentary: Play, Parenting, and Peer Partners: Keys to Understanding Children's Social Development?

A1 - Ladd,Gary W.

Y1 - 1992///

N1 - SuppNotes - Special Issue: Prosocial and Aggressive Play Behavior

Last updated - 2012-12-14

SubjectsTermNotLitGenreText - 915; Child Development 1443 5053 2787; 3085 3150; 7537 3851 5449 8768; 7672 5127; Peer Relationship 7676 5449 8768; 7940 126; Social Development 9753 5053 2787; 9822; Young Children 11655 1474 316 8016 4542

KW - Rough Play

KW - Toy Guns

KW - War Toys

KW - ERIC,Current Index to Journals in Education (CIJE)

KW - Early Childhood Education

KW - Play

KW - Young Children

KW - Parent Child Relationship

KW - Behavior Patterns

KW - Peer Influence

KW - Child Development

KW - Social Development

KW - SOCIALIZATION

KW - Peer Relationship

KW - ERIC

KW - Rough and Tumble

RP - NOT IN FILE

SP - 401

EP - 406

JF - Early Education and Development

VL - 3

IS - 4

N2 - A commentary on the articles in this special issue addresses the themes of the origins and consequences of children's adversarial social roles and behaviors; children's peer relationships as a context for social learning and development; and linkages between the family and peer systems. (LB)

SN - 1040-9289, 1040-9289

UR - <http://search.proquest.com/docview/62849686?accountid=14701>

ER -

TY - JOUR

ID - 1412

T1 - A Longitudinal Study of Popular and Rejected Children's Rough-and-Tumble Play

A1 - Pellegrini,D.A.

Y1 - 1991///

N1 - Last updated - 2012-12-14

SubjectsTermNotLitGenreText - 324 545 9738 909; 3352 3368 3150; Elementary School Students 3363 10278 8016 4542; 6175 1326 3629 6582 8836; Play 7940 126; Popularity 8012; 8233 1710; Rejection (Psychology) 8766 8415; Social Cognition 9748 1710; 10183 909

KW - Cognitive Flexibility

KW - Rough and Tumble Play

KW - Social Affiliation

KW - Social Problem Solving

KW - Sociometric Status

KW - ERIC,Current Index to Journals in Education (CIJE)

KW - Elementary Education

KW - Elementary School Students  
KW - Rejection (Psychology)  
KW - Play  
KW - Popularity  
KW - Social Cognition  
KW - Student Behavior  
KW - Longitudinal Studies  
KW - Aggression  
KW - Problem Solving  
KW - ERIC  
KW - Rough and Tumble  
RP - NOT IN FILE  
SP - 205  
EP - 213  
JF - Early Education and Development  
VL - 2  
IS - 3  
N2 - Examined longitudinal associations between the rough-and-tumble play of popular and rejected children and measures of their social affiliation and social cognition. Results suggest that rough-and-tumble play for popular, but not rejected, children predicts aspects of social affiliation and social cognitive status. (Author/GLR)  
SN - 1040-8289, 1040-8289  
UR - <http://search.proquest.com/docview/62928606?accountid=14701>  
ER -

TY - GEN  
ID - 1413  
T1 - School-Age Ideas and Activities for After School Programs  
A1 - Haas-Foletta,Karen  
A1 - Cogley,Michele  
Y1 - 1990///  
N1 - Availability - Level 2 - Produced in microfiche (1966-2003)  
Last updated - 2012-12-14  
KW - Social Problem Solving  
KW - ERIC,Resources in Education (RIE)  
KW - Elementary Education  
KW - Printing  
KW - Play  
KW - Class Activities  
KW - After School Programs  
KW - Painting (Visual Arts)  
KW - Horticulture  
KW - Problem Solving  
KW - Childrens Games  
KW - Science Projects  
KW - Handicrafts  
KW - Day Care  
KW - Cooking Instruction  
KW - ERIC  
KW - Rough and Tumble  
RP - NOT IN FILE  
SP - 174  
PB - School-Age NOTES, P.O. Box 40205, Nashville, TN 37204 (\$16.95).  
N2 - This guide describes activities for school-age children in after-school day care programs. These activities may also be used in other settings. An introductory section discusses program philosophy, room arrangement, multicultural curriculum, program scheduling, summer programs and holiday care, field trips and special programs, age grouping, communication between parents and teachers, and conflict resolution. Sections of the

guide describe approximately 150 activities that relate to: (1) problem solving in general and social problem solving in particular; (2) rough-and-tumble play; (3) painting; (4) printing; (5) making cards and gifts; (6) making masks, puppets, and gifts; (7) candle making; (8) making three-dimensional artworks; (9) cooking art supplies from recipes; (10) craft projects involving nature; (11) planting and growing plants and vegetables; (12) science experiments; and (13) indoor and outdoor games. A resource list of more than 120 publications is appended. (BC)

SN - 0917505034

UR - <http://search.proquest.com/docview/62890914?accountid=14701>

ER -

TY - GEN

ID - 1414

T1 - The Positive Aspects of Aggressive Behavior in Young Children

A1 - Periolat, Janet

A1 - Nager, Nancy

Y1 - 1988/12//

N1 - Availability - Level 1 - Available online, if indexed January 1993 onward

Last updated - 2012-12-14

KW - Play Fighting

KW - ERIC, Resources in Education (RIE)

KW - Preschool Education

KW - Teacher Role

KW - Teacher Student Relationship

KW - Teacher Influence

KW - Teacher Behavior

KW - Play

KW - Child Behavior

KW - Childhood Needs

KW - Conflict Resolution

KW - Conflict

KW - Child Responsibility

KW - Teacher Responsibility

KW - Hostility

KW - Sex Differences

KW - Preschool Children

KW - Aggression

KW - ERIC

KW - Rough and Tumble

RP - NOT IN FILE

SP - 20

N2 - Not all fighting or aggression in young children is bad, and some kinds of teacher intervention may be beneficial. Play-fighting refers primarily to rough and tumble play and chasing, and several studies have shown that play and serious fighting can be clearly distinguished in young children. Numerous authors have pointed out the value and positive aspects of aggression. Aggressive behavior is often the most immediate way for a child to communicate his or her desires and needs, and teachers need to try to understand what children are communicating rather than judge their behavior. Play-fighting is a very common occurrence among boys, and seems to occur less with girls. Girls who display aggressive behavior have generally been socialized like boys. Boys often use aggressive behavior and play-fighting to make friends, exhibit frustration due to failure at making friends, and to become more assertive and overcome their fear of aggressive boys. It is crucial for adults and teachers to encourage children to respond to aggression by asserting their feelings with statements such as "Stop it" or "I don't like that," rather than by simply hitting back or running to the teacher. A child's self-esteem can build when encouraged to take responsibility for his or her own feelings. Teachers can play a positive role in assisting children to express and channel their aggressive behavior. (AS)

UR - <http://search.proquest.com/docview/62698227?accountid=14701>

ER -



TY - GEN

ID - 1415

T1 - Toy Making for Parents and Caregivers

A1 - Cortez, Carmen P.

Y1 - 1985/06//

N1 - Availability - Level 1 - Available online, if indexed January 1993 onward

SuppNotes - Paper presented at the Annual Conference of the Association for Childhood Education International (San Antonio, TX, June 19-22, 1985)

Last updated - 2012-12-14

KW - ERIC,Resources in Education (RIE)

KW - Parents

KW - Teachers

KW - Practitioners

KW - Instructional Materials

KW - Play

KW - Parent Child Relationship

KW - Child Caregivers

KW - Family Life

KW - Learning Processes

KW - Learning Activities

KW - Toys

KW - Psychomotor Skills

KW - Skill Development

KW - ERIC

KW - Rough and Tumble

RP - NOT IN FILE

SP - 79

N2 - Recognizing that toy-making activities have tremendous potential for developing good parent-child interactions, this paper examines (1) the why, where, when, how, and who of making toys at home; (2) the use of toys in play; and (3) the value of toys as tools for learning. The snags and obstacles of toy making as well as the challenges and benefits are mentioned. Most of the paper contains instructions for making the following toys: rolling can, sound canisters, toy drum with bean bags, wooden blocks, nesting cans, wall picture, feeling blocks, first picture book, chip can, happy/sad face pillow, shape puzzle, sequential cups, hobby horse, rag doll, and hand puppets. All instructions are accompanied by charts relating the toy to language learning, using the five senses, as well as modeling activities for parents. (HOD)

UR - <http://search.proquest.com/docview/63298497?accountid=14701>

ER -

TY - RPRT

ID - 1416

T1 - Children's Social-Cognitive Play Behavior: The Effects of Age, Gender, and Activity Centers

A1 - Pellegrini, Anthony D.

Y1 - 1983///

N1 - Availability - Level 1 - Available online, if indexed January 1993 onward

Last updated - 2012-12-14

KW - Dyads

KW - ERIC,Resources in Education (RIE)

KW - Preschool Education

KW - Play

KW - Cognitive Processes

KW - Social Behavior

KW - Sex Differences

KW - Learning Centers (Classroom)

KW - Preschool Children

KW - Age Differences

KW - Models

KW - ERIC

KW - Rough and Tumble

RP - NOT IN FILE

SP - 22

N2 - This study examined a model suggesting that personal variables (age and gender) and environmental variables (activity centers) affect social-cognitive aspects of children's play. A total of 80 children (32 boys and 48 girls) participated. Same-age and same-gender dyads from each of two age groups (4- and 5-year-olds) were observed playing in an experimental playroom. On two occasions, children played in a dramatic center and on two occasions in a blocks center. Social-cognitive aspects of play were scored according to a time-sampling procedure and were concurrently scored on a nested social-cognitive matrix with an additional listing for onlooking, unoccupied, and rough-and-tumble behaviors. Results were compatible with those suggested by the model. Specifically, play generally followed the themes suggested by the props in each of the two centers. Predicted age effects were supported to the extent that play became more complex with age. Gender interacted with age and activity center to cause variation in play. Main effects due to gender were, however, unreliable. Results were considered significant in that they document the main and interactive effects of personal and controlled environmental variables on preschoolers' play behaviors. (Author/RH)

UR - <http://search.proquest.com/docview/63411951?accountid=14701>

ER -

TY - GEN

ID - 1417

T1 - Metacommunication in Rough and Tumble Play

A1 - Donaldson,Fred

Y1 - 1976///

N1 - Last updated - 2012-12-14

KW - Metacommunication

KW - ERIC,Current Index to Journals in Education (CIJE)

KW - Elementary Education

KW - Play Therapy

KW - Play

KW - Nonverbal Communication

KW - Student Behavior

KW - ERIC

KW - Rough and Tumble

RP - NOT IN FILE

SP - 235

EP - 239

JF - Reading Improvement

VL - 13

IS - 4

N2 - Discusses the components of rough and tumble play, analyzing three play sequences with a brief summary of the metacommunication taking place in child behavior. (RB)

UR - <http://search.proquest.com/docview/63931220?accountid=14701>

ER -

TY - JOUR

ID - 1500

T1 - The freedom to explore: examining the influence of independent mobility on weekday, weekend and after-school physical activity behaviour in children living in urban and inner-suburban neighbourhoods of varying socioeconomic status

A1 - Stone,M.R.

A1 - Faulkner,G.E.

A1 - Mitra,R.

A1 - Buliung,R.N.

Y1 - 2014///

N1 - Stone, Michelle R. Faulkner, Guy Ej. Mitra, Raktim. Buliung, Ron N

The international journal of behavioral nutrition and physical activity

101217089

IM

Journal Article. Research Support, Non-U.S. Gov't

English

KW - Medline

KW - Unsupervised Play Addition

RP - NOT IN FILE

SP - 5

JF - International Journal of Behavioral Nutrition & Physical Activity

JA - Int.

VL - 11

CY - England

N2 - BACKGROUND: Children's independent mobility (CIM) is critical to healthy development in childhood.

The physical layout and social characteristics of neighbourhoods can impact opportunities for CIM. While global evidence is mounting on CIM, to the authors' knowledge, Canadian data on CIM and related health outcomes (i.e., physical activity (PA) behaviour) are missing. The purpose of this study was to examine if CIM is related to multiple characteristics of accelerometry-measured PA behaviour (total PA, light PA, moderate-to-vigorous PA, time spent sedentary) and whether associations between CIM and PA behaviour systematically vary by place of residence, stratifying by gender and type of day/period (weekdays, after-school, weekend).

METHODS: Participants were recruited through Project BEAT (Built Environment and Active Transport; <http://www.beat.utoronto.ca>). Children (n=856) were stratified into four neighbourhood classifications based on the period of neighbourhood development (urban built environment (BE) (old BE) versus inner-suburban BE (new BE)) and socioeconomic status (SES; low SES and high SES). Physical activity was measured via accelerometry (ActiGraph GT1M). CIM was assessed via parental report and two categories were created (low CIM, n=332; high CIM, n=524). A series of two-factor ANOVAs were used to determine gender-specific differences in PA for weekdays, weekend days and the after-school period, according to level of CIM, across four neighbourhood classifications. RESULTS: Children who were granted at least some independent mobility (high CIM) had more positive PA profiles across the school week, during the after-school period, and over the weekend; they were also less sedentary. The influence of CIM on PA behaviour was particularly salient during the after-school period. Associations of CIM with PA varied by gender, and also by neighbourhood classification. CIM seemed to matter more in urban neighbourhoods for boys and suburban neighbourhoods for girls. CONCLUSION: Our findings highlight the importance of independent mobility to multiple characteristics of children's PA behaviour across the week. Furthermore, they emphasize that independent mobility-activity relationships need to be considered by gender and the type of neighbourhood independent mobility is offered in. Future work will focus on developing a predictive model of CIM that could be used to inform decision-making around alleviating barriers to CIM

SN - 1479-5868

AD - School of Health and Human Performance, Faculty of Health Professions, Dalhousie University, 6230 South Street, PO Box 15000 Halifax, Nova Scotia B3H4R2, Canada. michelle.stone@dal.ca

UR - 24450739

ER -

TY - JOUR

ID - 1501

T1 - Associations between children's independent mobility and physical activity

A1 - Schoeppe,S.

A1 - Duncan,M.J.

A1 - Badland,H.M.

A1 - Oliver,M.

A1 - Browne,M.

Y1 - 2014///

N1 - Schoeppe, Stephanie. Duncan, Mitch J. Badland, Hannah M. Oliver, Melody. Browne, Matthew

BMC public health

100968562

IM

Journal Article

English

KW - Medline

KW - Unsupervised Play Addition

RP - NOT IN FILE

SP - 91

JA - BMC Public Health

VL - 14

IS - 1

CY - England

N2 - **BACKGROUND:** Independent mobility describes the freedom of children to travel and play in public spaces without adult supervision. The potential benefits for children are significant such as social interactions with peers, spatial and traffic safety skills and increased physical activity. Yet, the health benefits of independent mobility, particularly on physical activity accumulation, are largely unexplored. This study aimed to investigate associations of children's independent mobility with light, moderate-to-vigorous, and total physical activity accumulation. **METHODS:** In 2011 - 2012, 375 Australian children aged 8-13 years (62% girls) were recruited into a cross-sectional study. Children's independent mobility (i.e. independent travel to school and non-school destinations, independent outdoor play) and socio-demographics were assessed through child and parent surveys. Physical activity intensity was measured objectively through an Actiheart monitor worn on four consecutive days. Associations between independent mobility and physical activity variables were analysed using generalized linear models, accounting for clustered sampling, Actiheart wear time, socio-demographics, and assessing interactions by sex. **RESULTS:** Independent travel (walking, cycling, public transport) to school and non-school destinations were not associated with light, moderate-to-vigorous and total physical activity. However, sub-analyses revealed a positive association between independent walking and cycling (excluding public transport) to school and total physical but only in boys ( $b=36.03$ ,  $p<0.05$ ). Frequent independent outdoor play (three or more days per week) was positively associated with light and total physical activity ( $b=29.76$ ,  $p<0.01$  and  $b=32.43$ ,  $p=0.03$ , respectively). No significant associations were found between independent outdoor play and moderate-to-vigorous physical activity. When assessing differences by sex, the observed significant associations of independent outdoor play with light and total physical activity remained in girls but not in boys. All other associations showed no significant differences by sex. **CONCLUSIONS:** Independent outdoor play may boost children's daily physical activity levels, predominantly at light intensity. Hence, facilitating independent outdoor play could be a viable intervention strategy to enhance physical activity in children, particularly in girls. Associations between independent travel and physical activity are inconsistent overall and require further investigation

SN - 1471-2458

AD - Central Queensland University, School of Human, Health and Social Sciences, Centre for Physical Activity Studies, Building 18, Bruce Highway, Rockhampton QLD 4702, Australia. s.schoeppe@cqu.edu.au

UR - 24476363

ER -

TY - JOUR

ID - 1502

T1 - The impact of parents' fear of strangers and perceptions of informal social control on children's independent mobility

A1 - Foster,S.

A1 - Villanueva,K.

A1 - Wood,L.

A1 - Christian,H.

A1 - Giles-Corti,B.

Y1 - 2014/03//

N1 - Foster, Sarah. Villanueva, Karen. Wood, Lisa. Christian, Hayley. Giles-Corti, Billie

Health & place

din, 9510067

T

Journal Article

English

KW - Medline

KW - Unsupervised Play Addition

RP - NOT IN FILE

SP - 60

EP - 68

JF - Health & Place

JA - Health Place

VL - 26

CY - England

N2 - Declines in children's independent mobility are commonly attributed to parents' fear of strangers, yet few empirical studies have investigated this relationship. We examined: (1) the impact of parents' fear of strangers on children's independent mobility; and (2) whether informal social control (i.e., parents' confidence that other residents would look out for local children) mitigated any association. Gender stratified logistic regression models tested these associations for 10-12 year-olds and their parents (n=1231) in Perth, Australia. For girls, parental fear of strangers was associated with lower odds of independent mobility (OR=0.71, p=0.002), and informal social control and other social and built environment variables had little attenuating influence. This pattern was consistent for boys; however odds ratios were lower and statistical significance weaker. Initiatives that target parental fears combined with interventions that normalise children's walking may help increase independent mobility. 2013 Elsevier Ltd. All rights reserved

SN - 1873-2054

AD - Centre for the Built Environment and Health, School of Population Health, The University of Western Australia, 35 Stirling Highway, Crawley, WA 6009, Australia. Electronic address: sarah.foster@uwa.edu.au., McCaughey Centre VicHealth Centre for Community Wellbeing, Melbourne School of Population and Global Health, University of Melbourne, Melbourne, VIC 3010, Australia. Electronic address: k.villanueva@unimelb.edu.au., Centre for the Built Environment and Health, School of Population Health, The University of Western Australia, 35 Stirling Highway, Crawley, WA 6009, Australia. Electronic address: lisa.wood@uwa.edu.au., Centre for the Built Environment and Health, School of Population Health, The University of Western Australia, 35 Stirling Highway, Crawley, WA 6009, Australia. Electronic address: hayley.christian@uwa.edu.au., McCaughey Centre VicHealth Centre for Community Wellbeing, Melbourne School of Population and Global Health, University of Melbourne, Melbourne, VIC 3010, Australia. Electronic address: b.giles-corti@unimelb.edu.au

UR - 24374289

ER -

TY - JOUR

ID - 1503

T1 - Independent mobility, perceptions of the built environment and children's participation in play, active travel and structured exercise and sport: the PEACH Project

A1 - Page,A.S.

A1 - Cooper,A.R.

A1 - Griew,P.

A1 - Jago,R.

Y1 - 2010///

N1 - Page, Angie S. Cooper, Ashley R. Griew, Pippa. Jago, Russell  
The international journal of behavioral nutrition and physical activity  
101217089

Journal Article

English

KW - Medline

KW - Unsupervised Play Addition

RP - NOT IN FILE

SP - 17

JF - International Journal of Behavioral Nutrition & Physical Activity

JA - Int.

VL - 7

CY - England

**N2 - BACKGROUND:** Independent mobility (IM) and perceptions of the built environment may relate differentially to children's participation in various physical activity contexts. This cross-sectional study investigated whether independent mobility and perceptions of the built environment in boys and girls were related to physical activity in three different contexts (outdoor play, structured exercise/sport, active commuting). **METHODS:** Thirteen hundred and seven 10-11 year old boys and girls from 23 schools in a large UK city completed a computerised questionnaire. Independent variables in logistic regression analyses were weekly self-reported frequency of participation in outdoor play, structured exercise/sport and mode of travel home from school. Dependent variables were perceptions of the environment (aesthetics, nuisance, safety, social norm, constraint, play space, accessibility), local and area independent mobility and linear distance from home to school. Analyses were adjusted for body mass index, minutes of daylight after school, level of neighbourhood deprivation and pubertal status. **RESULTS:** For boys, local independent mobility (Local-IM) was related to an increased likelihood of everyday participation in play (OR 1.58: 95% CI 1.19-2.10), structured exercise/sport (OR 1.42: 1.06-1.89) and active commuting (OR 1.40: 1.07-1.87) but was only related to active commuting for girls (OR 1.49: 1.07-2.07). Boys and girls were more likely to report playing out every day if they had higher scores for Social Norm (Boys: OR 1.63 (1.12-2.37); Girls: OR 1.53 (1.01-2.31)) and, for girls only, more positive perceptions of traffic safety (OR 1.63: 1.14-2.34). Easy access to a range of destinations was the dominant predictor for taking part in structured exercise/sport everyday (Boys: OR 1.62 (1.01-2.66); Girls: OR 1.65 (1.07-2.53)). Shorter distance from home to school (OR 0.99: 0.98-0.99) and, for boys only, greater perceived accessibility (OR 1.87: 1.04-3.36) were significantly related to active commuting to school. **CONCLUSIONS:** Perceptions of the physical environment relate differently to different physical activity contexts and by gender. The only consistent correlate for outdoor play, structured ex/sport and active commuting was higher independent mobility to visit local destinations (Local-IM) for boys. Considering both the physical activity context and its independent correlates should improve the specificity of physical activity interventions in children

SN - 1479-5868

AD - Department of Exercise, Nutrition &amp; Health Sciences, University of Bristol, Bristol, UK.

a.s.page@bris.ac.uk

UR - 20170504

ER -

TY - JOUR

ID - 1504

T1 - Independent mobility in relation to weekday and weekend physical activity in children aged 10-11 years:

The PEACH Project

A1 - Page,A.S.

A1 - Cooper,A.R.

A1 - Griew,P.

A1 - Davis,L.

A1 - Hillsdon,M.

Y1 - 2009///

N1 - Page, Angie S. Cooper, Ashley R. Griew, Pippa. Davis, Laura. Hillsdon, Melvyn

The international journal of behavioral nutrition and physical activity

101217089

Journal Article

English

KW - Medline

KW - Unsupervised Play Addition

RP - NOT IN FILE

SP - 2

JF - International Journal of Behavioral Nutrition &amp; Physical Activity

JA - Int.

VL - 6

CY - England

**N2 - BACKGROUND:** Children's independent mobility has fallen in recent years and may in part explain reported declines in physical activity in young people. This cross-sectional study investigated whether independent mobility in boys and girls was related to objectively measured physical activity. **METHODS:** Thirteen hundred and seven 10-11 year old boys and girls from 23 schools in a large UK city took part. Measures included objectively recorded physical activity (accelerometer (Actigraph GT1M)), height (m) and weight (kg), a newly developed scale for local (Local-IM) and area independent mobility (Area-IM), minutes of daylight after school, level of neighbourhood deprivation and pubertal status. **RESULTS:** Boys had greater Local-IM, Area-IM and physical activity (average weekday and weekend counts per minute) compared to girls. In linear regression analyses (adjusting for minutes of daylight after school, neighbourhood deprivation, pubertal status and body mass index) higher scores for Local-IM and Area-IM were significantly ( $p < 0.01$ ) related to higher levels of physical activity on weekdays for boys and girls. For weekend physical activity, only Local-IM in girls remained significant ( $p < 0.05$ ) in the model. **CONCLUSION:** Independent mobility appears to be an important independent correlate of weekday physical activity for both boys and girls

SN - 1479-5868

AD - Department of Exercise, Nutrition & Health Sciences, University of Bristol, Bristol, UK.

a.s.page@bris.ac.uk

UR - 19128458

ER -

TY - JOUR

ID - 1505

T1 - Practice considerations for the introduction and use of power mobility for children

A1 - Livingstone,R.

A1 - Paleg,G.

Y1 - 2014/03//

N1 - Livingstone, Roslyn. Paleg, Ginny

Developmental medicine and child neurology

0006761, e83

IM

Journal Article

English

KW - Medline

KW - Unsupervised Play Addition

RP - NOT IN FILE

SP - 210

EP - 221

JF - Developmental Medicine & Child Neurology

JA - Dev.Med Child Neurol.

VL - 56

IS - 3

CY - England

**N2 - AIM:** The aim of the study was to support clinicians in recommending and justifying power mobility for children of different ages and abilities, and with different needs. The study comprised three distinct parts: a literature review; a Delphi consensus; and clinical practice considerations. **METHOD:** A scoping review of eight electronic databases and manual searches carried out in February 2011 identified 15 themes or transferable messages among 27 articles meeting initial inclusion criteria and these formed the basis of a draft paper. Informal consensus at two international conference presentations refined and modified the paper to include 10 messages supported by 24 articles. The literature review was updated in May 2012 and a modified Delphi process sought to formalize the consensus process with an international panel of 16 expert clinicians and researchers using a priori criteria of 80% agreement. **RESULTS:** Evidence from studies was classified using the American Academy of Cerebral Palsy and Developmental Medicine guidelines, with evidence from most studies being classified as either level IV or level V, apart from one study each with evidence classified as level II and level III. Expert consensus on the content and wording of nine transferable messages may raise evidence overall to level III. **INTERPRETATION:** This paper suggests that power mobility may reasonably be considered as an effective and appropriate intervention for children lacking efficient, independent mobility from

around 12 months of age including children who may never become competent drivers and children lacking independent mobility only in early childhood. 2013 Mac Keith Press

SN - 1469-8749

AD - Sunny Hill Health Centre for Children, Vancouver, BC, Canada

UR - 23998510

ER -

TY - JOUR

ID - 1506

T1 - From playfulness and self-centredness via grand expectations to normalisation: a psychoanalytical rereading of the history of molecular genetics

A1 - Zwart,H.A.

Y1 - 2013/11//

N1 - Zwart, H A E

Medicine, health care, and philosophy

9815900, drk

E, IM

Journal Article. Research Support, Non-U.S. Gov't

English

KW - Medline

KW - Unsupervised Play Addition

RP - NOT IN FILE

SP - 775

EP - 788

JF - Medicine, Health Care & Philosophy

JA - Med Health Care Philos.

VL - 16

IS - 4

CY - Netherlands

N2 - In this paper, I will reread the history of molecular genetics from a psychoanalytical angle, analysing it as a case history. Building on the developmental theories of Freud and his followers, I will distinguish four stages, namely: (1) oedipal childhood, notably the epoch of model building (1943-1953); (2) the latency period, with a focus on the development of basic skills (1953-1989); (3) adolescence, exemplified by the Human Genome Project, with its fierce conflicts, great expectations and grandiose claims (1989-2003) and (4) adulthood (2003-present) during which revolutionary research areas such as molecular biology and genomics have achieved a certain level of normalcy--have evolved into a normal science. I will indicate how a psychoanalytical assessment conducted in this manner may help us to interpret and address some of the key normative issues that have been raised with regard to molecular genetics over the years, such as 'relevance', 'responsible innovation' and 'promise management'

SN - 1572-8633

AD - Institute for Science, Innovation and Society (ISIS), Department of Philosophy and Science Studies (Chair), Centre for Society and the Life Sciences (CSG), University of Nijmegen, Nijmegen, The Netherlands, h.zwart@science.ru.nl

UR - 23595614

ER -

TY - JOUR

ID - 1507

T1 - A qualitative study of 'fear' as a regulator of children's independent physical activity in the suburbs

A1 - O'Connor,J.

A1 - Brown,A.

Y1 - 2013/11//

N1 - O'Connor, Justen. Brown, Alice

Health & place

din, 9510067

T



Journal Article

English

KW - Medline

KW - Unsupervised Play Addition

RP - NOT IN FILE

SP - 157

EP - 164

JF - Health &amp; Place

JA - Health Place

VL - 24

CY - England

N2 - A crisis discourse has developed within the health and physical activity literature that paints a disparaging picture about the decline of children's participation in active play and independent mobility. Fear as a moderator of children's mobility, in this case focused on independent active school travel (IAST), remains a poorly understood construct. Within the popular press and academic literature, middle class parents have been characterised as overly anxious towards culturally reinforced dangers whilst being ignorant of the benefits of IAST during childhood. Fear of strangers, dangers and risk-taking are portrayed as nebulous and irrational anxiety states that are contributing to another great fear, a fear that our children are getting fat. The study draws upon Tudor's, (2003), parameters of fear framework to explore parent negotiations of fear and risk associated with IAST. In depth individual and focus group interviews with parents (N=24) provide insight into meanings, rules and customs that govern the way in which fear is experienced and expressed within a middle class white suburb in Australia. Far from being irrational, and operating purely from drivers at a cultural level, parents were aware of the consequences of their decisions on a range of outcomes. Parents could articulate their own anxieties and in many cases the rational probabilities of anything bad happening. Fear was being constructed through complex relations, negotiated individually and collectively within a specific cultural and environmental context. In the process of their decision-making, there remained a constant negotiation between a desire to allow their child independence and the question 'what if?' Those seeking to mediate increased opportunities for children's IAST are encouraged to remove the rational/irrational focus that was redundant for parents in this study, and consider shifting the message toward the positive side of what is a highly contested decision making space for parents. 2013 Elsevier Ltd. All rights reserved

SN - 1873-2054

AD - Monash University Australia, Faculty of Education, Building A, McMahons Rd., Frankston, Melbourne, VIC 3199, Australia. Electronic address: justen.oconnor@monash.edu

UR - 24112962

ER -

TY - JOUR

ID - 1508

T1 - Effects of supervised exercise program on metabolic function in overweight adolescents

A1 - Meucci,M.

A1 - Cook,C.

A1 - Curry,C.D.

A1 - Guidetti,L.

A1 - Baldari,C.

A1 - Collier,S.R.

Y1 - 2013/11//

N1 - Meucci, Marco. Cook, Carol. Curry, Chelsea Diane. Guidetti, Laura. Baldari, Carlo. Collier, Scott Robert  
World journal of pediatrics : WJP

101278599

IM

Journal Article

English

KW - Medline

KW - Unsupervised Play Addition

RP - NOT IN FILE

SP - 307

EP - 311

JF - World Journal of Pediatrics

JA - World J Pediatr

VL - 9

IS - 4

CY - China

N2 - **BACKGROUND:** Inactivity is a primary factor related to childhood obesity, yet aerobic exercise has been shown to prevent weight gain and improve fitness in adolescents. Moreover, children become less active during their summer break from school. This study compared the effects of 4 and 8 weeks of supervised summer activity versus an unsupervised summer break on metabolic function and fitness in adolescents. **METHODS:** Twenty-two adolescents were divided into 4-week (n=6, weight 48.1+14.9 kg, body fat 27.4+8.4%) and 8-week exercise groups (n=6, weight 43.4+10.9 kg, body fat 28.5+12.8%), that performed supervised, play-based physical activity, versus an age-matched 8 week control group that maintained their typical summer break (n=10, weight 41.7+10.0 kg, body fat 23.7+8.0%). Anthropometrics, resting energy expenditure (REE), resting heart rate (RHR) and peak aerobic capacity (VO(2peak)) were evaluated before and after the intervention (4 or 8 weeks). **RESULTS:** REE showed group differences in posttraining conditions (the 4-week group vs. the control group, 1220+169 vs. 1067+144 kcal/die, and the 8-week group vs. the control group, 1202+151 vs. 1067+144 kcal/die, P=0.047), but RHR decreased (pre-program vs. post program: 97+22 vs. 80+8 beat/min, P=0.001) and VO(2peak) significantly increased (pre-program vs. post program: 27.8+7.8 vs. 34.8+6.5 mL/kg/min, P=0.001) in the 8-week group compared to the control group. **CONCLUSIONS:** Eight weeks of supervised play-based activity increased REE and VO(2peak) in adolescents with concomitant decreases in RHR. These data suggest that this novel model of exercise prescription could be considered world-wide by clinicians to improve fitness base in adolescents and help to combat the growing epidemic of childhood obesity

SN - 1867-0687

AD - Health Science Department, University of Rome "Foro Italico", Boone, NC, USA

UR - 24235064

ER -

TY - JOUR

ID - 1509

T1 - Adolescents' empathy and prosocial behavior in the family context: a longitudinal study

A1 - Yoo,H.

A1 - Feng,X.

A1 - Day,R.D.

Y1 - 2013/12//

N1 - Yoo, Hana. Feng, Xin. Day, Randal D

Journal of youth and adolescence

0333507

IM

Journal Article. Research Support, Non-U.S. Gov't

English

KW - Medline

KW - Unsupervised Play Addition

RP - NOT IN FILE

SP - 1858

EP - 1872

JF - Journal of Youth &amp; Adolescence

JA - J Youth Adolesc

VL - 42

IS - 12

CY - United States

N2 - Children's empathy and prosocial behavior play an important role in their social competence. Of the influential factors, research has demonstrated that parental behaviors and the quality of the parent-child relationship are important correlates of children's development of empathy and prosocial behavior. The current study examined the associations between different types of parental behaviors (i.e., parental knowledge, parental solicitation, and parental psychological control), "balanced connectedness" in the parent-child relationship,

which allows for both closeness and autonomy, and empathy and prosocial behavior in adolescents. The participants were 335 married couples (more than 80 % European American) and their adolescent child (49.0 % female; 10-13 years). Data were collected at three time points for parental behaviors, balanced parent-child connectedness, and adolescents' empathy and prosocial behavior, respectively. The results of structural equation modeling suggested that adolescents' perceptions of parental solicitation and parental psychological control may be associated with their empathy and prosocial behavior through their perceived balanced connectedness with parents. These findings suggest that enhancing balanced connectedness in the parent-child relationship may contribute to promoting empathy and prosocial behavior in adolescents over time. Further, this study suggests that parental solicitation may play a role in adolescents' empathic and prosocial development, possibly depending on the quality of the parent-child relationship

SN - 1573-6601

AD - Human Development and Family Science, The Ohio State University, 135 Campbell Hall, 1787 Neil Ave., Columbus, OH, 43210, USA, yoo.161@buckeyemail.osu.edu

UR - 23283695

ER -

TY - JOUR

ID - 1510

T1 - A new walking aid with axillary support for children with cerebral palsy: electromyographic evaluation

A1 - Botega,R.

A1 - Medola,F.O.

A1 - Santos,C.B.

A1 - Silva,A.T.

A1 - Iunes,D.H.

A1 - Purquerio,Bde M.

Y1 - 2013/11//

N1 - Botega, Renan. Medola, Fausto Orsi. Santos, Christiane B Abrao. Silva, Adriana Teresa. Iunes, Denise Hollanda. Purquerio, Benedito de Moraes

Disability and rehabilitation. Assistive technology

101255937

IM

Journal Article

English

KW - Medline

KW - Unsupervised Play Addition

RP - NOT IN FILE

SP - 507

EP - 510

JF - Disability & Rehabilitation Assistive Technology

JA - Disabil

VL - 8

IS - 6

CY - England

N2 - **PURPOSE:** To present a new walking aid with axillary support (WAAS) for children with cerebral palsy (CP) and to investigate its impact on the lower limb muscles activation in the gait of children with CP.

**METHOD:** Six children with spastic diparesis due to CP performed a straight line walking course in two situations: with and without using the WAAS. Each course was repeated three times for both situations, and electromyography (EMG) activity of quadriceps, hamstrings, tibialis anterior and gastrocnemius were recorded during all trials. **RESULTS:** The use of WAAS significantly increased the EMG activity of the quadriceps and hamstrings during stance phase and tibialis anterior during swing phase, with no significant increase in gastrocnemius activation. **CONCLUSION:** The use of WAAS improved the synergism of lower limbs muscles of children with CP by reducing the coactivation of antagonistic muscles, especially during the swing phase of gait. Providing a walking aid with improved trunk stability may enable children with CP to improve muscular synergism and walking ability, thus favoring independent mobility, with possible gains in social participation and quality of life. **IMPLICATIONS FOR REHABILITATION:** Children with cerebral palsy have problems with the development of normal gait, as a result of the reduced motor control and the impaired muscle

synergism of the lower limbs. Standard walking aids do not provide proper trunk stability for this group of children. In a relatively small sample of children with cerebral palsy, a walking aid with axillary support was shown to be beneficial for the muscular synergism of the lower limbs during gait

SN - 1748-3115

AD - Department of Mechanical Engineering, Sao Carlos Engineering School, University of Sao Carlos , Sao Carlos (SP) , Brazil

UR - 23480125

ER -

TY - JOUR

ID - 1511

T1 - Safe play areas on farms in New South Wales

A1 - Depczynski,J.

A1 - Herde,E.

A1 - Fragar,L.

A1 - Lower,T.

Y1 - 2013/08//

N1 - Depczynski, Julie. Herde, Emily. Fragar, Lyn. Lower, Tony

The Australian journal of rural health

9305903, c0i

N

Journal Article. Research Support, Non-U.S. Gov't

English

KW - Medline

KW - Unsupervised Play Addition

RP - NOT IN FILE

SP - 220

EP - 224

JF - Australian Journal of Rural Health

JA - Aust J Rural Health

VL - 21

IS - 4

CY - Australia

N2 - OBJECTIVE: To assess the prevalence and security of fenced house yards on NSW farms and rural properties with a view to providing information to increase the development of safe play areas on farms.

DESIGN: A cross-sectional stratified study using computer-assisted telephone interviewing. SETTING:

Interviews were conducted in the four rural Area Health Services throughout February to December 2008.

PARTICIPANTS: Randomly selected sample of 1117 adults living on a farm or rural property in the study areas. MAIN OUTCOME MEASURES: Self-reported issues involving fenced house yards or safe play areas for children.

RESULTS: Overall, 79.8% of farm respondents reported that they had a fenced house yard or safe play area. For those respondents with a fenced house yard, 66.6% reported that it was secure enough to prevent /make it difficult for a young child to wander away unsupervised. Based on these figures, it is estimated that only 53.1% of all farms or rural properties have a secure fenced house yard or safe play area. There were statistically significant variations between geographic locations, with the North Coast (37.7%) being lower.

CONCLUSIONS: This study illustrates a need across rural NSW to further promote, install or upgrade secure fenced house yards or safe play areas. While all geographic regions of the state could improve provision to protect children, there may also be some that are in need of more intensive intervention programs to enhance compliance. Such a proposition may also be relevant on a national level. 2013 The Authors. Australian Journal of Rural Health National Rural Health Alliance Inc

SN - 1440-1584

AD - Australian Centre for Agricultural Health and Safety, Moree, New South Wales, Australia

UR - 24033523

ER -

TY - JOUR

ID - 1512

T1 - Understanding the drive to escort: a cross-sectional analysis examining parental attitudes towards children's school travel and independent mobility

A1 - Mammen,G.

A1 - Faulkner,G.

A1 - Buliung,R.

A1 - Lay,J.

Y1 - 2012///

N1 - Mammen, George. Faulkner, Guy. Buliung, Ron. Lay, Jennifer

BMC public health

100968562

IM

Journal Article. Research Support, Non-U.S. Gov't

English

KW - Medline

KW - Unsupervised Play Addition

RP - NOT IN FILE

SP - 862

JA - BMC Public Health

VL - 12

CY - England

N2 - **BACKGROUND:** The declining prevalence of Active School Transportation (AST) has been accompanied by a decrease in independent mobility internationally. The objective of this study was to compare family demographics and AST related perceptions of parents who let their children walk unescorted to/from school to those parents who escort (walk and drive) their children to/from school. By comparing these groups, insight was gained into how we may encourage greater AST and independent mobility in youth living in the Greater Toronto and Hamilton Area, Canada. **METHODS:** This study involved a cross-sectional design, using data from a self-reported questionnaire (n =1,016) that examined parental perceptions and attitudes regarding AST. A multinomial logistic regression analysis was used to explore the differences between households where children travelled independently to school or were escorted. **RESULTS:** Findings revealed that unescorted children were: significantly older, the families spoke predominantly English at home, more likely to live within one kilometer from school, and their parents agreed to a greater extent that they chose to reside in the current neighborhood in order for their child to walk to/from school. The parents of the escorted children worried significantly more about strangers and bullies approaching their child as well as the traffic volume around school. **CONCLUSIONS:** From both a policy and research perspective, this study highlights the value of distinguishing between mode (i.e., walking or driving) and travel independence. For policy, our findings highlight the need for planning decisions about the siting of elementary schools to include considerations of the impact of catchment size on how children get to/from school. Given the importance of age, distance, and safety issues as significant correlates of independent mobility, research and practice should focus on the development and sustainability of non-infrastructure programs that alleviate parental safety concerns

SN - 1471-2458

AD - Faculty of Kinesiology and Physical Education, University of Toronto, 55 Harbord St, Toronto, ON, M5S 2W6, Canada

UR - 23051005

ER -

TY - JOUR

ID - 1513

T1 - Relationship between neurological injury and patterns of upright mobility in children with spinal cord injury

A1 - Chafetz,R.S.

A1 - Gaughan,J.P.

A1 - Calhoun,C.

A1 - Schottler,J.

A1 - Vogel,L.C.

A1 - Betz,R.

A1 - Mulcahey,M.J.

Y1 - 2013///

N1 - Chafetz, Ross S. Gaughan, John P. Calhoun, Christina. Schottler, Jennifer. Vogel, Lawrence C. Betz, Randal. Mulcahey, M J

Topics in spinal cord injury rehabilitation  
9515174

Journal Article

English

KW - Medline

KW - Unsupervised Play Addition

RP - NOT IN FILE

SP - 31

EP - 41

JF - Topics in Spinal Cord Injury Rehabilitation

JA - Top Spinal Cord Inj Rehabil

VL - 19

IS - 1

CY - United States

N2 - BACKGROUND: The predictors and patterns of upright mobility in children with a spinal cord injury (SCI) are poorly understood. OBJECTIVE: The objective of this study was to develop a classification system that measures children's ability to integrate ambulation into activities of daily living (ADLs) and to examine upright mobility patterns as a function of their score and classification on the International Standards for Neurological Classification of Spinal Cord Injury (ISNCSCI) exam. METHODS: This is a cross-sectional, multicenter study that used a convenience sample of subjects who were participating in a larger study on the reliability of the ISNCSCI. A total of 183 patients between 5 and 21 years old were included in this study. Patients were asked if they had participated in upright mobility in the last month and, if so, in what environment and with what type of bracing. Patients were then categorized into 4 groups: primary ambulators (PrimA), unplanned ambulators (UnPA), planned ambulators (PlanA), and nonambulators. RESULTS: Multivariate analyses found that only lower extremity strength predicted being a PrimA, whereas being an UnPA was predicted by both lower extremity strength and lack of preservation of S45 pinprick sensation. PlanA was only associated with upper extremity strength. CONCLUSIONS: This study introduced a classification system based on the ability of children with SCI to integrate upright mobility into their ADLs. Similar to adults, lower extremity strength was a strong predictor of independent mobility (PrimA and UnPA). Lack of pinprick predicted unplanned ambulation, but not being a PrimA. Finally, upper extremity strength was a predictor for planned ambulation

SN - 1082-0744

AD - Shriners Hospitals for Children , Philadelphia, Pennsylvania

UR - 23678283

ER -

TY - JOUR

ID - 1515

T1 - Systematic reviews of bruising in relation to child abuse-what have we learnt: an overview of review updates. [Review]

A1 - Maguire,S.

A1 - Mann,M.

Y1 - 2013/03/07/

N1 - Maguire, Sabine. Mann, Mala

Evidence-based child health : a Cochrane review journal

101296879

IM

Journal Article. Research Support, Non-U.S. Gov't. Review

English

KW - Adolescent

KW - Child

KW - Child Abuse/di [Diagnosis]

KW - Preschool

KW - Contusions/di [Diagnosis]  
 KW - Contusions/pp [Physiopathology]  
 KW - Diagnosis  
 KW - Differential  
 KW - Evidence-Based Medicine  
 KW - Humans  
 KW - Infant  
 KW - Newborn  
 KW - Time Factors  
 KW - Wounds and Injuries/di [Diagnosis]  
 KW - Wounds and Injuries/pp [Physiopathology]  
 KW - Medline  
 KW - Unsupervised Play Addition  
 RP - NOT IN FILE  
 SP - 255  
 EP - 263  
 JF - Evidence-Based Child Health a Cochrane Review Journal  
 JA - Evid Based Child Health  
 VL - 8  
 IS - 2  
 CY - England

N2 - BACKGROUND: Dogma has long prevailed regarding the ageing of bruises, and whether certain patterns of bruising are suggestive or diagnostic of child abuse. OBJECTIVES: We conducted the first Systematic Reviews addressing these two issues, to determine the scientific basis for current clinical practice. There have been seven updates since 2004. METHODS: An all language literature search was performed across 13 databases, 1951-2004, using >60 key words, supplemented by 'snowballing' techniques. Quality standards included a novel confirmation of abuse scale. Updates used expanded key words, and a higher standard for confirmation of abuse. RESULTS: Of 1495 potential studies, only three met the inclusion criteria for ageing of bruises in 2004, confirming that it is inaccurate to do so with the naked eye. This was roundly rejected when first reported, generating a wave of new studies attempting to determine a scientifically valid method to age bruises, none of which are applicable in children yet. Regarding patterns of bruising that may be suggestive or diagnostic of abuse, we included 23 of 167 studies reviewed in 2004, although only 2 were comparative studies. Included studies noted that unintentional bruises occur predominantly on the front of the body, over bony prominences and their presence is directly correlated to the child's level of independent mobility. Bruising patterns in abused children, differed in location (most common site being face, neck, ear, head, trunk, buttocks, arms), and tended to be larger. Updates have included a further 14 studies, including bruising in disabled children, defining distinguishing patterns in severely injured abused and non-abused children, and importance of petechiae. CONCLUSIONS: Systematic Reviews of bruising challenged accepted wisdom regarding ageing of bruises, which had no scientific basis; stimulated higher quality research on patterns of bruises distinguishing abusive and non-abusive bruising patterns, and highlighted the benefits of regular updates of these reviews. Copyright 2013 The Cochrane Collaboration. Published by John Wiley & Sons, Ltd

SN - 1557-6272

AD - Early Years Research Programme, School of Medicine, Cardiff University, Wales, UK.

sabinemaguire@gmail.com

UR - 23877882

ER -

TY - JOUR

ID - 1516

T1 - Associations of children's independent mobility and active travel with physical activity, sedentary behaviour and weight status: a systematic review. [Review]

A1 - Schoeppe,S.

A1 - Duncan,M.J.

A1 - Badland,H.

A1 - Oliver,M.

A1 - Curtis,C.

Y1 - 2013/07//

N1 - Schoeppe, Stephanie. Duncan, Mitch J. Badland, Hannah. Oliver, Melody. Curtis, Carey

Journal of science and medicine in sport / Sports Medicine Australia

c54, 9812598

IM

Case Reports. Journal Article. Research Support, Non-U.S. Gov't. Review

English

KW - Body Weight

KW - Child

KW - Exercise

KW - Humans

KW - Independent Living

KW - Randomized Controlled Trials as Topic

KW - Sedentary Lifestyle

KW - Travel

KW - Medline

KW - Unsupervised Play Addition

RP - NOT IN FILE

SP - 312

EP - 319

JF - Journal of Science & Medicine in Sport

JA - J Sci Med Sport

VL - 16

IS - 4

CY - Australia

N2 - UNLABELLED: Health benefits from children's independent mobility and active travel beyond school travel are largely unexplored. OBJECTIVES: This review synthesized the evidence for associations of independent mobility and active travel to various destinations with physical activity, sedentary behaviour and weight status. DESIGN: Systematic review. METHODS: A systematic search in six databases (PubMed, Scopus, CINAHL, SportDiscus, PsychInfo, TRIS) for papers published between January 1990 and March 2012 was undertaken, focussing on children aged 3-18 years. Study inclusion and methodological quality were independently assessed by two reviewers. RESULTS: 52 studies were included. Most studies focussed solely on active travel to and/or from school, and showed significant positive associations with physical activity. The same relationship was detected for active travel to leisure-related places and independent mobility with physical activity. An inverse relationship between active travel to school and weight status was evident but findings were inconsistent. Few studies examined correlations between active travel to school and self-reported screen-time or objectively measured sedentary behaviour, and findings were unclear. CONCLUSIONS: Studies on independent mobility suggested that children who have the freedom to play outdoors and travel actively without adult supervision accumulate more physical activity than those who do not. Further investigation of children's active travel to leisure-related destinations, measurement of diverse sedentary behaviour beyond simply screen-based activities, and consistent thresholds for objectively measured sedentary behaviour in children will clarify the inconsistent evidence base on associations of active travel with sedentary behaviour and weight status.

Copyright 2012 Sports Medicine Australia. Published by Elsevier Ltd. All rights reserved

SN - 1878-1861

AD - Central Queensland University, Institute for Health and Social Science Research, Centre for Physical Activity Studies, Rockhampton, QLD, Australia. s.schoeppe@cqu.edu.au

UR - 23219100

ER -

TY - JOUR

ID - 1517

T1 - Psychological needs, purpose in life, and problem video game playing among Chinese young adults

A1 - Wu,A.M.

A1 - Lei,L.L.

A1 - Ku,L.

Y1 - 2013//



N1 - Wu, Anise M S. Lei, Lamis L M. Ku, Lisbeth

International journal of psychology : Journal international de psychologie

0107305

IM

Journal Article

English

KW - Adult

KW - Asian Continental Ancestry Group/px [Psychology]

KW - Asian Continental Ancestry Group/sn [Statistics & Numerical Data]

KW - Female

KW - Goals

KW - Humans

KW - Interpersonal Relations

KW - Macau/ep [Epidemiology]

KW - Male

KW - Mental Competency

KW - Personal Autonomy

KW - Questionnaires

KW - Self Efficacy

KW - Video Games/px [Psychology]

KW - Video Games/sn [Statistics & Numerical Data]

KW - Medline

KW - Unsupervised Play Addition

RP - NOT IN FILE

SP - 583

EP - 590

JF - International Journal of Psychology

JA - Int J Psychol

VL - 48

IS - 4

CY - England

N2 - The negative impacts of excessive and problematic video game playing on both children and adults are attracting increasing concern. Based on self-determination theory (SDT; Ryan & Deci, 2000), this study hypothesized that the three basic psychological needs of autonomy, competence, and relatedness are positively associated with purpose in life, which in turn acts as a protective factor against problem video game playing among Chinese young adult players. Through a questionnaire survey with a sample of 165 Chinese adults aged between 18 and 30 years (mean age=22.7 years), we found that perceived autonomy, competence, relatedness, and purpose in life were all negatively correlated with problem game playing. The demographic and psychological factors explained 38% of the variances of problem game playing. Specifically, gender, perceived relatedness, and purpose in life emerged as the three most salient predictors of problem game playing among the Chinese young adults. The mediating role of purpose in life was evidenced and it was found that purpose in life mediated the influences of the psychological needs proposed by SDT on problem game playing. Moreover, young men were significantly more susceptible to problem game playing than their female counterparts. To conclude, psychological needs and purpose in life influenced Chinese young adults' vulnerability to problem game playing directly or indirectly. Intervention programs that encourage social involvement and voluntary work, as well as counseling service that helps clients to search for life purpose, are suggested for intervening in problem game playing among Chinese young adults

SN - 1464-066X

AD - Department of Psychology, University of Macau, Macao, China. anisewu@umac.mo

UR - 22506646

ER -

TY - JOUR

ID - 1518

T1 - Accidents due to falls from roof slabs

A1 - Rudelli,B.A.

A1 - Silva, M.V.

A1 - Akkari, M.

A1 - Santili, C.

Y1 - 2013///

N1 - Rudelli, Bruno Alves. Silva, Marcelo Valerio Alabarce da. Akkari, Miguel. Santili, Claudio

Sao Paulo medical journal = Revista paulista de medicina

100897261, dio

IM

Journal Article. Research Support, Non-U.S. Gov't

English

KW - Accident Prevention/mt [Methods]

KW - Accidental Falls/pc [Prevention & Control]

KW - Accidental Falls/sn [Statistics & Numerical Data]

KW - Accidents

KW - Home/pc [Prevention & Control]

KW - Home/sn [Statistics & Numerical Data]

KW - Adolescent

KW - Brain Injuries/pc [Prevention & Control]

KW - Child

KW - Preschool

KW - Female

KW - Housing

KW - Humans

KW - Infant

KW - Longitudinal Studies

KW - Male

KW - Play and Playthings/in [Injuries]

KW - Prospective Studies

KW - Risk Factors

KW - Medline

KW - Unsupervised Play Addition

RP - NOT IN FILE

SP - 153

EP - 157

JF - Sao Paulo Medical Journal = Revista Paulista de Medicina

JA - Sao Paulo Med J

VL - 131

IS - 3

CY - Brazil

N2 - CONTEXT AND OBJECTIVE Falls from the roof slabs of houses are accidents of high potential severity that occur in large Brazilian cities and often affect children and adolescents. The aims of this study were to characterize the factors that predispose towards this type of fall involving children and adolescents, quantify the severity of associated lesions and suggest preventive measures. DESIGN AND SETTING Descriptive observational prospective longitudinal study in two hospitals in the metropolitan region of Sao Paulo.

METHODS Data were collected from 29 cases of falls from roof slabs involving children and adolescents between October 2008 and October 2009. RESULTS Cases involving males were more prevalent, accounting for 84%. The predominant age group was schoolchildren (7 to 12 years old; 44%). Leisure activities were most frequently being practiced on the roof slab at the time of the fall (86%), and flying a kite was the most prevalent game (37.9%). In 72% of the cases, the children were unaccompanied by an adult responsible for them. Severe conditions such as multiple trauma and traumatic brain injuries resulted from 79% of the accidents.

CONCLUSION Falls from roof slabs are accidents of high potential severity, and preventive measures aimed towards informing parents and guardians about the dangers and risk factors associated with this type of accident are needed, along with physical protective measures, such as low walls around the slab and gates with locks to restrict free access to these places

SN - 1806-9460

AD - Department of Orthopedics and Traumatology, Hospital da Clinicas, Faculdade de Medicina da Universidade de Sao Paulo, Brazil. rudelli.bruno@yahoo.com.br

UR - 23903263

ER -

TY - JOUR

ID - 1519

T1 - Seasonal and locational variations in children's play: implications for wellbeing

A1 - Ergler,C.R.

A1 - Kearns,R.A.

A1 - Witten,K.

Y1 - 2013/08//

N1 - Ergler, Christina R. Kearns, Robin A. Witten, Karen

Social science & medicine (1982)

ut9, 8303205

IM

Journal Article. Research Support, Non-U.S. Gov't

English

KW - Child

KW - Child Welfare

KW - Female

KW - Geography

KW - Medical

KW - Humans

KW - Male

KW - New Zealand

KW - Play and Playthings/px [Psychology]

KW - Play and Playthings

KW - Residence Characteristics/sn [Statistics & Numerical Data]

KW - Seasons

KW - Medline

KW - Unsupervised Play Addition

RP - NOT IN FILE

SP - 178

EP - 185

JF - Social Science & Medicine

JA - Soc Sci Med

VL - 91

CY - England

N2 - Physical activity, through independent outdoor play, has come to the fore as a way to improve children's health through it fostering healthy mental and social as well as physiological development. However, in many high-income countries children's autonomous play opportunities have diminished due to urban intensification and declining parental license. Regardless of this trend, children's play varies across countries, cities, cultures and seasons. This paper offers new insights into the complexities of play as a vital aspect of children's wellbeing. Within the context of New Zealand - whose citizens generally regard themselves as outdoor people - this paper explores why 'play' might resonate differently across localities and seasons. We contrast the play affordances provided by Auckland's central city (dominated by apartment living) with Beach Haven, a suburban area. We employed a multi-method approach and included 20 children and their parents who were recruited through school and summer holiday programs embracing different gender and ethnicities to reflect the general cultural mix of the respective neighbourhoods. We advance two arguments. First, we suggest that the rarity of children playing outdoors un-supervised normalises supervised indoor play and reduces children's opportunities to see outdoor play as an alternative to interior or supervised pastimes. Second, we follow Bourdieu's theory of practice to argue that the regard parents and children have towards outdoor play reflects locally constituted beliefs about what is seasonally 'appropriate' children's activity. We found that extra-curricular activities and supervised excursions are undertaken in the central city all year around and only vary between social groups by the type of destination. In the suburb, independent outdoor play in summer represents children's main business

after school in ways that enhance their environmental literacy and potential future health gain. For others these symbolic values were replaced by safety concerns. In contrast, it seems that even in a relatively mild climate winter is the time to relax and stay indoors unless children have an outdoor habitus. We find that the determinants of seasonal outdoor play transcend modifiable barriers such as traffic and unsuitable play spaces as well as the inevitable issue of inclement weather. Copyright 2012 Elsevier Ltd. All rights reserved

SN - 1873-5347

AD - The University of Auckland, School of Environment, Private Bag 90219, Auckland 1142, New Zealand.  
c.ergler@auckland.ac.nz

UR - 23312793

ER -

TY - JOUR

ID - 1520

T1 - A place for play? The influence of the home physical environment on children's physical activity and sedentary behaviour. [Review]

A1 - Maitland,C.

A1 - Stratton,G.

A1 - Foster,S.

A1 - Braham,R.

A1 - Rosenberg,M.

Y1 - 2013///

N1 - Maitland, Clover. Stratton, Gareth. Foster, Sarah. Braham, Rebecca. Rosenberg, Michael  
The international journal of behavioral nutrition and physical activity

101217089

IM

Journal Article. Research Support, Non-U.S. Gov't. Review

English

KW - Child

KW - Child Behavior

KW - Environment

KW - Exercise

KW - Health Behavior

KW - Humans

KW - Parent-Child Relations

KW - Parenting

KW - Parents

KW - Play and Playthings

KW - Sedentary Lifestyle

KW - Social Environment

KW - Television

KW - Video Games

KW - Medline

KW - Unsupervised Play Addition

RP - NOT IN FILE

SP - 99

JF - International Journal of Behavioral Nutrition & Physical Activity

JA - Int.

VL - 10

CY - England

N2 - The home environment is an important influence on the sedentary behaviour and physical activity of children, who have limited independent mobility and spend much of their time at home. This article reviews the current evidence regarding the influence of the home physical environment on the sedentary behaviour and physical activity of children aged 8-14 years. A literature search of peer reviewed articles published between 2005 and 2011 resulted in 38 observational studies (21 with activity outcomes, 23 with sedentary outcomes) and 11 experimental studies included in the review. The most commonly investigated behavioural outcomes were television watching and moderate to vigorous physical activity. Media equipment in the home and to a lesser

extent the bedroom were positively associated with children's sedentary behaviour. Physical activity equipment and the house and yard were not associated with physical activity, although environmental measures were exclusively self-reported. On the other hand, physical activity equipment was inversely associated with sedentary behaviours in half of studies. Observational studies that investigated the influence of the physical and social environment within the home space, found that the social environment, particularly the role of parents, was important. Experimental studies that changed the home physical environment by introducing a television limiting device successfully decreased television viewing, whereas the influence of introducing an active video game on activity outcomes was inconsistent. Results highlight that the home environment is an important influence on children's sedentary behaviour and physical activity, about which much is still unknown. While changing or controlling the home physical environment shows promise for reducing screen based sedentary behaviour, further interventions are needed to understand the broader impact of these changes. Future studies should prioritise investigating the influence of the home physical environment, and its interaction with the social environment, on objectively measured sedentary time and home context specific behaviours, ideally including technologies that allow objective measures of the home space

SN - 1479-5868

AD - School of Sport Science, Exercise and Health, University of Western Australia, 35 Stirling Highway, Crawley, WA 6009, Australia. clover.maitland@uwa.edu.au

UR - 23958282

ER -

TY - JOUR

ID - 1521

T1 - Parental physical activity, safety perceptions and children's independent mobility

A1 - Santos,M.P.

A1 - Pizarro,A.N.

A1 - Mota,J.

A1 - Marques,E.A.

Y1 - 2013///

N1 - Santos, Maria Paula. Pizarro, Andreia N. Mota, Jorge. Marques, Elisa A

BMC public health

100968562

IM

Journal Article. Research Support, Non-U.S. Gov't

English

KW - Adult

KW - Child

KW - Cross-Sectional Studies

KW - Female

KW - Health Knowledge

KW - Attitudes

KW - Practice

KW - Humans

KW - Independent Living

KW - Male

KW - Middle Aged

KW - Motor Activity

KW - Parent-Child Relations

KW - Perception

KW - Residence Characteristics

KW - Safety

KW - Sedentary Lifestyle

KW - Medline

KW - Unsupervised Play Addition

RP - NOT IN FILE

SP - 584

JA - BMC Public Health

VL - 13

CY - England

N2 - **BACKGROUND:** Parents are likely to be a basic influence on their children's behavior. There is an absence of information about the associations between parents' physical activity and perception of neighborhood environment with children's independent mobility. The purpose of this study is to examine the contribution of parental physical activity and perception of neighborhood safety to children's independent mobility.

**METHODS:** In this cross-sectional study of 354 pupils and their parents, independent mobility, perceptions of neighborhood safety and physical activity were evaluated by questionnaire. Categorical principal components analyses were used to determine the underlying dimensions of both independent mobility and perceptions of neighborhood safety items.

**RESULTS:** The strongest predictor of independent mobility was the parental perception of sidewalk and street safety (beta = 0.132). Parent's physical activity was also a significant predictor. The final model accounted for 13.0% of the variance. **CONCLUSIONS:** Parental perception of neighborhood safety and parents' self reported physical activity might be associated with children's independent mobility. Further research in this topic is needed to explore this possible association

SN - 1471-2458

AD - Research Centre in Physical Activity, Health and Leisure (CIAFEL), Faculty of Sport, University of Porto, Rua Dr. Placido Costa 91, Porto 4200-450, Portugal. msantos@fade.up.pt

UR - 23767778

ER -

TY - JOUR

ID - 1522

T1 - Independent mobility after early introduction of a power wheelchair in spinal muscular atrophy

A1 - Dunaway,S.

A1 - Montes,J.

A1 - O'Hagen,J.

A1 - Sproule,D.M.

A1 - Vivo,D.C.

A1 - Kaufmann,P.

Y1 - 2013/05//

N1 - Dunaway, Sally. Montes, Jacqueline. O'Hagen, Jessica. Sproule, Douglas M. Vivo, Darryl C De.

Kaufmann, Petra

Journal of child neurology

ia2, 8606714

IM

Journal Article. Research Support, Non-U.S. Gov't

English

KW - Activities of Daily Living/cl [Classification]

KW - Activities of Daily Living/px [Psychology]

KW - Child

KW - Preschool

KW - Contracture/di [Diagnosis]

KW - Contracture/rh [Rehabilitation]

KW - Disability Evaluation

KW - Female

KW - Follow-Up Studies

KW - Humans

KW - Infant

KW - Male

KW - Motor Skills Disorders/di [Diagnosis]

KW - Motor Skills Disorders/rh [Rehabilitation]

KW - Muscular Dystrophies/cn [Congenital]

KW - Muscular Dystrophies/di [Diagnosis]

KW - Muscular Dystrophies/rh [Rehabilitation]

KW - Pilot Projects

KW - Spinal Muscular Atrophies of Childhood/di [Diagnosis]

KW - Spinal Muscular Atrophies of Childhood/rh [Rehabilitation]

KW - Wheelchairs

KW - Medline

KW - Unsupervised Play Addition

RP - NOT IN FILE

SP - 576

EP - 582

JF - Journal of Child Neurology

JA - J Child Neurol

VL - 28

IS - 5

CY - United States

N2 - Weakness resulting from spinal muscular atrophy causes severe limitations in functional mobility. The early introduction of power mobility has potential to enhance development and mitigate disability. These outcomes are achieved by simulating normal skill acquisition and by promoting motor learning, visuospatial system development, self-exploration, cognition, and social development. There are few reports on early power mobility in spinal muscular atrophy, and it is typically not prescribed until school age. The authors evaluated 6 children under age 2 years with neuromuscular disease (5 spinal muscular atrophy, 1 congenital muscular dystrophy) for power mobility. Parents recorded the practice hours necessary to achieve independence using the Power Mobility Skills Checklist. Four children achieved independence in all items on the checklist by 7.9 months (range: 73-458 days). Introduction of early power mobility is feasible in spinal muscular atrophy patients under age 2 years and should be introduced in late infancy when children typically acquire locomotor skills

SN - 1708-8283

AD - Neurology Department, Columbia University Medical Center, New York, NY 10032, USA.

sld2120@columbia.edu

UR - 22772161

ER -

TY - JOUR

ID - 1523

T1 - The impact of recreational video game play on children's and adolescents' cognition

A1 - Blumberg,F.C.

A1 - Altschuler,E.A.

A1 - Almonte,D.E.

A1 - Mileaf,M.I.

Y1 - 2013///

N1 - Blumberg, Fran C. Altschuler, Elizabeth A. Almonte, Debby E. Mileaf, Maxwell I

New directions for child and adolescent development

100886823, dc2

IM

Journal Article

English

KW - Adolescent

KW - Adolescent Behavior

KW - Belgium

KW - Humans

KW - Netherlands

KW - Personal Autonomy

KW - Social Identification

KW - Medline

KW - Unsupervised Play Addition

RP - NOT IN FILE

SP - 41

EP - 50

JF - New Directions for Child & Adolescent Development

JA - New Dir.Child Adolesc Dev

VL - 2013

IS - 139

CY - United States

N2 - Current empirical findings show linkages between recreational video game play and enhanced cognitive skills, primarily among young adults. However, consideration of this linkage among children and adolescents is sparse. Thus, discussions about facilitating transfer of cognitive skills from video game play to academic tasks among children and adolescents remains largely uninformed by research. To inform this discussion, we review available research concerning the cognitive benefits of video game play among children and adolescents and their impressions of video games as learning tools as these impressions may impact their application of cognitive skills used during game play to academic tasks. Copyright 2013 Wiley Periodicals, Inc., A Wiley Company

SN - 1534-8687

AD - Division of Psychological & Educational Services, Fordham University Graduate School of Education, New York, USA. blumberg@fordham.edu

UR - 23483692

ER -

TY - JOUR

ID - 1524

T1 - The challenge of audience reception: a developmental model for educational game engagement

A1 - Sherry,J.L.

Y1 - 2013///

N1 - Sherry, John L

New directions for child and adolescent development

100886823, dc2

IM

Journal Article

English

KW - Adolescent

KW - Adolescent Behavior

KW - Belgium

KW - Humans

KW - Netherlands

KW - Personal Autonomy

KW - Social Identification

KW - Medline

KW - Unsupervised Play Addition

RP - NOT IN FILE

SP - 11

EP - 20

JF - New Directions for Child & Adolescent Development

JA - New Dir.Child Adolesc Dev

VL - 2013

IS - 139

CY - United States

N2 - According to educational gaming advocates, the engaging nature of games encourages sustained game play and enhanced attention to learning outcomes among players. Because children's and adolescents' play time varies by game genre, engagement with a game likely reflects the match between the genre and the player's preferences and needs. Youth learn which games are likely to promote satisfying psychological needs and yield positive experiences, which then informs their engagement with the games. A model is presented for research and development of educational games based on uses and gratifications theory from communication science, as well as developmental science and cognitive science findings. Copyright 2013 Wiley Periodicals, Inc., A Wiley Company

SN - 1534-8687

AD - Department of Communication at Michigan State University, Michigan, USA. jsherry@msu.edu



UR - 23483689

ER -

TY - JOUR

ID - 1525

T1 - Introduction: digital games as a context for cognitive development, learning, and developmental research

A1 - Blumberg,F.C.

A1 - Fisch,S.M.

Y1 - 2013///

N1 - Blumberg, Fran C. Fisch, Shalom M

New directions for child and adolescent development

100886823, dc2

IM

Introductory Journal Article

English

KW - Adolescent

KW - Adolescent Behavior

KW - Belgium

KW - Humans

KW - Netherlands

KW - Personal Autonomy

KW - Social Identification

KW - Medline

KW - Unsupervised Play Addition

RP - NOT IN FILE

SP - 1

EP - 9

JF - New Directions for Child & Adolescent Development

JA - New Dir.Child Adolesc Dev

VL - 2013

IS - 139

CY - United States

N2 - The authors present reasons why developmental psychologists should care about children's and adolescents' digital game play. These reasons may be identified as: a) digital game play is an integral aspect of children's and adolescents' lives; b) digital game play contributes to learning and cognitive development; and c) developmental research has the potential to contribute to effective educational game design. The authors expand on these reasons with the goal of introducing or reintroducing to developmental psychologists a rich and very relevant context in which to examine children's and adolescents' applied cognitive development. Copyright 2013 Wiley Periodicals, Inc., A Wiley Company

SN - 1534-8687

AD - Division of Psychological& Educational Services, Fordham University Graduate School of Education, New York, USA. blumberg@fordham.edu

UR - 23483688

ER -

TY - JOUR

ID - 1527

T1 - Individual, social and physical environmental correlates of 'never' and 'always' cycling to school among 10 to 12 year old children living within a 3.0 km distance from school

A1 - Ducheyne,F.

A1 - De,Bourdeaudhuij,I

A1 - Spittaels,H.

A1 - Cardon,G.

Y1 - 2012///

N1 - Ducheyne, Fabian. De Bourdeaudhuij, Ilse. Spittaels, Heleen. Cardon, Greet

The international journal of behavioral nutrition and physical activity

101217089

IM

Journal Article. Research Support, Non-U.S. Gov't

English

KW - Adolescent

KW - Automobile Driving

KW - Belgium

KW - Bicycling/sn [Statistics &amp; Numerical Data]

KW - Child

KW - Cross-Sectional Studies

KW - Environment Design

KW - Female

KW - Health Knowledge

KW - Attitudes

KW - Practice

KW - Humans

KW - Logistic Models

KW - Male

KW - Multivariate Analysis

KW - Parents/px [Psychology]

KW - Questionnaires

KW - Residence Characteristics

KW - Risk Factors

KW - Schools

KW - Transportation

KW - Walking/sn [Statistics &amp; Numerical Data]

KW - Medline

KW - Unsupervised Play Addition

RP - NOT IN FILE

SP - 142

JF - International Journal of Behavioral Nutrition &amp; Physical Activity

JA - Int.

VL - 9

CY - England

N2 - **BACKGROUND:** Cycling to school has been identified as an important target for increasing physical activity levels in children. However, knowledge about correlates of cycling to school is scarce as many studies did not make a distinction between walking and cycling to school. Moreover, correlates of cycling to school for those who live within a distance, that in theory would allow cycling to school, stay undiscovered. Therefore, this study examined individual, social and physical environmental correlates of never and always cycling to/from school among 10 to 12 year old Belgian children living within a 3.0 km distance from school. **METHODS:** 850 parents completed a questionnaire to assess personal, family, behavioral, cognitive, social and physical environmental factors related to the cycling behavior of their children. Parents indicated on a question matrix how many days a week their child (1) walked, (2) cycled, was (3) driven by car or (4) public transport to and from school during fall, winter and spring. Multivariate logistic regression analyses were conducted to examine the correlates. **RESULTS:** Overall, 39.3% of children never cycled to school and 16.5% of children always cycled to school. Children with high levels of independent mobility and good cycling skills perceived by their parents were more likely to always cycle to school (resp. OR 1.06; 95% CI 1.04-1.15 and OR 1.08; 95% CI 1.01-1.16) and less likely to never cycle to school (resp. OR 0.84; 95% CI 0.78-0.91 and OR 0.77; 95% CI 0.7-0.84). Children with friends who encourage them to cycle to school were more likely to always cycle to school (OR 1.08; 95% CI 1.01-1.15) and less likely to never cycle to school (OR 0.9; 95% CI 0.83-1.0). In addition, children with parents who encourage them to cycle to school were less likely to never cycle to school (OR 0.78; 95% CI 0.7-0.87). Regarding the physical environmental factors, only neighborhood traffic safety was significantly associated with cycling: i.e., children were more likely to always cycle to school if neighborhood traffic was perceived as safe by their parents (OR 1.18; 95% CI 1.07-1.31). **CONCLUSION:** Individual, social and physical environmental factors were associated with children's cycling behavior to/from school. However,

the contribution of the physical environment is limited and highlights the fact that interventions for increasing cycling to school should not focus solely on the physical environment

SN - 1479-5868

AD - Department of Movement and Sports Sciences, Ghent University, Gent, Belgium.

Fabian.Ducheyne@UGent.be

UR - 23228003

ER -

TY - JOUR

ID - 1528

T1 - Coaches' interpersonal style, basic psychological needs and the well- and ill-being of young soccer players: a longitudinal analysis

A1 - Balaguer,I.

A1 - Gonzalez,L.

A1 - Fabra,P.

A1 - Castillo,I.

A1 - Merce,J.

A1 - Duda,J.L.

Y1 - 2012///

N1 - Balaguer, Isabel. Gonzalez, Lorena. Fabra, Priscila. Castillo, Isabel. Merce, Juan. Duda, Joan L

Journal of sports sciences

8405364, kbt

IM

Journal Article. Research Support, Non-U.S. Gov't

English

KW - Adaptation

KW - Psychological

KW - Adolescent

KW - Child

KW - Humans

KW - Interpersonal Relations

KW - Longitudinal Studies

KW - Male

KW - Perception

KW - Personal Autonomy

KW - Personal Satisfaction

KW - Physical Education and Training

KW - Psychological Theory

KW - Questionnaires

KW - Soccer/px [Psychology]

KW - Social Control

KW - Informal

KW - Social Environment

KW - Stress

KW - Medline

KW - Unsupervised Play Addition

RP - NOT IN FILE

SP - 1619

EP - 1629

JF - Journal of Sports Sciences

JA - J Sports Sci

VL - 30

IS - 15

CY - England

N2 - This study entailed a longitudinal test of basic psychological needs theory, a sub-theory in the self-determination framework (Deci & Ryan, 2000), in young soccer players. We examined whether changes in

soccer players' perceptions of the coaches' interpersonal style (autonomy supportive and controlling) predicted changes in the players' need satisfaction/need thwarting, and in turn, variability in their reported subjective vitality and burnout over the course of a season. Young male soccer players ( $M = 12.58 + 0.54$  years) completed a questionnaire at two time points in the season [ $n(T1) = 725$ ;  $n(T2) = 597$ ]. Changes in the players' perceptions of an autonomy supportive environment significantly predicted changes in psychological need satisfaction (positively) and in psychological need thwarting (negatively). Changes in psychological need satisfaction positively predicted changes in subjective vitality and negatively related to cross-time variation in global burnout scores. In contrast, changes in the players' perceptions of a controlling coach-created environment were positively associated with changes in psychological need thwarting that corresponded to increases in player burnout. Finally, results provided support for the assumed mediational roles of psychological need satisfaction and need thwarting in the social environment to well- and ill-being relationships

SN - 1466-447X

AD - Faculty of Psychology, University of Valencia, Valencia, Spain. Isabel.Balaguer@uv.es

UR - 23062028

ER -

TY - JOUR

ID - 1529

T1 - Young and free? A study of independent mobility among urban and rural dwelling Australian children

A1 - Carver,A.

A1 - Timperio,A.F.

A1 - Crawford,D.A.

Y1 - 2012/11//

N1 - Carver, Alison. Timperio, Anna F. Crawford, David A

Journal of science and medicine in sport / Sports Medicine Australia

c54, 9812598

IM

Journal Article. Research Support, Non-U.S. Gov't

English

KW - Adolescent

KW - Adult

KW - Australia/ep [Epidemiology]

KW - Bicycling/sn [Statistics & Numerical Data]

KW - Cellular Phone/sn [Statistics & Numerical Data]

KW - Child

KW - Cross-Sectional Studies

KW - Data Collection/mt [Methods]

KW - Female

KW - Humans

KW - Male

KW - Middle Aged

KW - Personal Autonomy

KW - Rural Population/sn [Statistics & Numerical Data]

KW - Schools/sn [Statistics & Numerical Data]

KW - Sex Factors

KW - Social Environment

KW - Urban Population/sn [Statistics & Numerical Data]

KW - Walking/sn [Statistics & Numerical Data]

KW - Medline

KW - Unsupervised Play Addition

RP - NOT IN FILE

SP - 505

EP - 510

JF - Journal of Science & Medicine in Sport

JA - J Sci Med Sport

VL - 15

IS - 6

CY - Australia

N2 - OBJECTIVES: To examine urban/rural differences in children's independent mobility; associations between mobility licences and children's independent mobility; and potential correlates of mobility licences. DESIGN: Cross-sectional study of 430 primary (48% boys; 72% urban) and 258 secondary schoolchildren (52% boys; 51.6% urban) and their parents. METHODS: Parents survey reported the mobility licences they granted to their children (e.g. allowing them to cross main roads on their own), access to outdoor playspaces and mobile phone ownership. Children survey reported their independent mobility on school journeys and on weekends. Differences were examined in mobility licences and independent mobility by sex, urban/rural setting and age-group. Regression analyses examined associations between mobility licences and independent mobility; and how access to playspaces, and mobile phone ownership, were associated with mobility licences. RESULTS: Overall, on average, boys were granted more mobility licences, than were girls, but there were no significant differences by urban/rural location. Variations in independent mobility by urban/rural locality were identified on the school journey but not on weekends. Boys attending urban primary schools had highest rates (44%) of walking/cycling independently to school; those attending rural secondary schools had the lowest (14%). Among urban boys and rural primary school-aged girls access to outdoor playspaces was associated with mobility licences. Mobile phone ownership was associated with mobility licences only among boys attending urban primary schools. CONCLUSIONS: Many Australian children in urban and rural areas lack independent mobility. Further research should examine social/physical environmental influences on parental restrictions, to inform interventions that aim to promote children's independent mobility. Copyright 2012 Sports Medicine Australia. Published by Elsevier Ltd. All rights reserved

SN - 1878-1861

AD - Centre for Physical Activity and Nutrition Research, School of Exercise and Nutrition Sciences, Deakin University, Australia. alison.carver@deakin.edu.au

UR - 22497720

ER -

TY - JOUR

ID - 1530

T1 - More than child's play: the potential benefits of play-based interventions for young children with ADHD

A1 - O'Neill,S.

A1 - Rajendran,K.

A1 - Halperin,J.M.

Y1 - 2012/10//

N1 - O'Neill, Sarah. Rajendran, Khushmand. Halperin, Jeffrey M

Expert review of neurotherapeutics

101129944

IM

Editorial. Research Support, N.I.H., Extramural

English

KW - Animals

KW - Attention Deficit Disorder with Hyperactivity/px [Psychology]

KW - Attention Deficit Disorder with Hyperactivity/th [Therapy]

KW - Child Behavior

KW - Child Development

KW - Child Psychology/ma [Manpower]

KW - Child Psychology/mt [Methods]

KW - Child Psychology/td [Trends]

KW - Child Psychology

KW - Child

KW - Preschool

KW - Family Relations

KW - Humans

KW - Parent-Child Relations

KW - Parents/ed [Education]

KW - Personal Autonomy

KW - Play Therapy  
KW - Play and Playthings/px [Psychology]  
KW - Medline  
KW - Unsupervised Play Addition  
RP - NOT IN FILE  
SP - 1165  
EP - 1167  
JF - Expert Review of Neurotherapeutics  
JA - Expert rev  
VL - 12  
IS - 10  
CY - England  
SN - 1744-8360  
UR - 23082729  
ER -  
  
TY - JOUR  
ID - 1531  
T1 - Comparing participation in activities among children with disabilities  
A1 - Masse,L.C.  
A1 - Miller,A.R.  
A1 - Shen,J.  
A1 - Schiariti,V.  
A1 - Roxborough,L.  
Y1 - 2012/11//  
N1 - Masse, Louise C. Miller, Anton R. Shen, Jane. Schiariti, Veronica. Roxborough, Lori  
Research in developmental disabilities  
8709782, rid  
IM  
Comparative Study. Journal Article. Research Support, Non-U.S. Gov't  
English  
KW - Adolescent  
KW - Child  
KW - Preschool  
KW - Disability Evaluation  
KW - Disabled Children/px [Psychology]  
KW - Female  
KW - Humans  
KW - Leisure Activities  
KW - Male  
KW - Motor Activity  
KW - Physical Education and Training  
KW - Play and Playthings  
KW - Recreation/px [Psychology]  
KW - Social Participation  
KW - Medline  
KW - Unsupervised Play Addition  
RP - NOT IN FILE  
SP - 2245  
EP - 2254  
JF - Research in Developmental Disabilities  
JA - Res.Dev.Disabil.  
VL - 33  
IS - 6  
CY - United States

**N2 - INTRODUCTION:** Compared to typically developing peers, children with disabilities due to neurodevelopmental disorders and disabilities (NDD/D) and to chronic medical conditions (CMC) have reduced participation in activities. The extent to which these two groups of children have different levels of participation is unknown and was examined in this study. **METHODS:** The 2006 Participation and Activity Limitation Survey children dataset collected by Statistics Canada was analyzed. Children with disabilities due to NDD/D and CMC were identified following review and classification of all ICD-10 codes in the dataset by two pediatricians. Dependent variables were parent-reported child participation in supervised and unsupervised physical activities within and outside of school, educational activities, and social/recreational activities. Logistic regression analyses, with relevant covariates (child and familial characteristics), were used to analyze the data. **RESULTS:** Children with NDD/D were significantly more likely to take part in supervised and unsupervised physical activity at school than children with CMC ( $p < 0.001$ ). A similar trend was observed for participation in school outings, although the effect was not significant at  $p < 0.01$ . Finally, a trend in the opposite direction was observed for educational activities, as children with NDD/D were less likely to take part in these activities than children with CMC. **DISCUSSION:** Finding decreased participation among children with CMC compared with NDD/D was not predicted a priori but has potential implications for their mental and physical health. **CONCLUSIONS:** Gaining a better understanding of the barriers to participation in physical activity may contribute to improving the overall health status of children with CMC. Copyright 2012 Elsevier Ltd. All rights reserved

SN - 1873-3379

AD - Department of Pediatrics, University of British Columbia, Vancouver, BC, Canada. lmasse@cfri.ubc.ca

UR - 22835684

ER -

TY - JOUR

ID - 1532

T1 - The Smart Wheelchair: is it an appropriate mobility training tool for children with physical disabilities?

A1 - McGarry,S.

A1 - Moir,L.

A1 - Girdler,S.

Y1 - 2012/09//

N1 - McGarry, Sarah. Moir, Lois. Girdler, Sonya

Disability and rehabilitation. Assistive technology

101255937

IM

Case Reports. Journal Article

English

KW - Activities of Daily Living

KW - Adolescent

KW - Cerebral Palsy/rh [Rehabilitation]

KW - Child

KW - Preschool

KW - Computer-Assisted Instruction/mt [Methods]

KW - Disabled Children/px [Psychology]

KW - Disabled Children/rh [Rehabilitation]

KW - Female

KW - Humans

KW - Male

KW - Quadriplegia/rh [Rehabilitation]

KW - Task Performance and Analysis

KW - Western Australia

KW - Wheelchairs

KW - Medline

KW - Unsupervised Play Addition

RP - NOT IN FILE

SP - 372

EP - 380

JF - Disability & Rehabilitation Assistive Technology

JA - Disabil

VL - 7

IS - 5

CY - England

N2 - **PURPOSE:** To describe the impact of a mobility training program using the Smart Wheelchair on the driving skills and psychosocial outcomes of children with physical disabilities. **METHOD:** A multiple case study design using mixed methods was used. Four children with physical disabilities were recruited through The Centre for Cerebral Palsy in Western Australia. The intervention was a 16 session Smart Wheelchair mobility training program. Data was collected using a quantitative driving skills assessment, field notes and qualitative parent interviews. **RESULTS:** Three out of four children gained independence in at least three driving skills or more, whilst one child was competent with verbal prompts. Three out of four mothers reported positive changes in their child's confidence, motivation and affect. **CONCLUSIONS:** The Smart Wheelchair has the ability to uncover learning potential and facilitate the recognition of abilities in children previously excluded from access to independent mobility. Given the significant limitation that restrictions in mobility pose to participation for children with physical disabilities, therapists must begin to understand the effectiveness of interventions such as the Smart Wheelchair. The descriptive findings of this study allow for future, more rigorous research, to be conducted on the effectiveness of the Smart Wheelchair as a mobility training tool

SN - 1748-3115

AD - Department of Occupational Therapy, School of Computing, Health and Science, Edith Cowan University, Perth, Australia. sarah.mcgarra@health.wa.gov.au

UR - 22124287

ER -

TY - JOUR

ID - 1534

T1 - Longitudinal associations between the quality of parent-child interactions and children's sleep at preschool age

A1 - Bordeleau,S.

A1 - Bernier,A.

A1 - Carrier,J.

Y1 - 2012/04//

N1 - Bordeleau, Stephanie. Bernier, Annie. Carrier, Julie

Journal of family psychology : JFP : journal of the Division of Family Psychology of the American Psychological Association (Division 43)

8802265, dlv

IM

Journal Article. Research Support, Non-U.S. Gov't

English

KW - Adult

KW - Child Development/ph [Physiology]

KW - Child

KW - Preschool

KW - Female

KW - Humans

KW - Infant

KW - Longitudinal Studies

KW - Male

KW - Parent-Child Relations

KW - Parenting/px [Psychology]

KW - Parents/px [Psychology]

KW - Prospective Studies

KW - Psychological Tests

KW - Sleep/ph [Physiology]

KW - Medline

KW - Unsupervised Play Addition



RP - NOT IN FILE

SP - 254

EP - 262

JF - Journal of Family Psychology

JA - J Fam Psychol

VL - 26

IS - 2

CY - United States

N2 - This study aimed to examine the prospective longitudinal links between the quality of mother-child and father-child interactions and preschoolers' sleep. Three dimensions of maternal interactive behavior were considered using 70 mother-child dyads, while the quality of father-child interactions was assessed using 41 of these families. Maternal mind-mindedness was assessed at 12 months during a mother-infant free-play sequence, maternal sensitivity was rated at 12 months based on observations performed throughout a home visit, maternal autonomy support was assessed at 15 months with a 10-min problem-solving situation, and the quality of father-child interactions was scored at 18 months, during father-child free play. Children's sleep was assessed at 3 and 4 years using a sleep diary completed by mothers during 3 consecutive days. Results indicated that, after controlling for family socioeconomic status and daycare attendance, the quality of both mother-infant and father-infant interactions was positively related to children's percentage of night-time sleep at preschool age. These findings add to previous literature in suggesting that early caregiving behavior by both mothers and fathers is related to subsequent child sleep. (c) 2012 APA, all rights reserved

SN - 1939-1293

AD - Department of Psychology, University of Montreal, P.O. Box 6128 Downtown Station, Montreal QC H3C 3J7, Canada

UR - 22369463

ER -

TY - JOUR

ID - 1536

T1 - Better walking performance in older children with cerebral palsy

A1 - Rodby-Bousquet,E.

A1 - Hagglund,G.

Y1 - 2012/05//

N1 - Rodby-Bousquet, Elisabet. Hagglund, Gunnar

Clinical orthopaedics and related research

0075674, dfy

AIM, IM

Journal Article. Research Support, Non-U.S. Gov't

English

KW - Activities of Daily Living

KW - Adolescent

KW - Age Factors

KW - Cerebral Palsy/di [Diagnosis]

KW - Cerebral Palsy/pp [Physiopathology]

KW - Child

KW - Preschool

KW - Cross-Sectional Studies

KW - Disability Evaluation

KW - Exercise Test

KW - Female

KW - Humans

KW - Male

KW - Motor Skills

KW - Muscle

KW - Skeletal/pa [Pathology]

KW - Skeletal/pp [Physiopathology]

KW - Walking

KW - Medline

KW - Unsupervised Play Addition

RP - NOT IN FILE

SP - 1286

EP - 1293

JF - Clinical Orthopaedics & Related Research

JA - Clin Orthop

VL - 470

IS - 5

CY - United States

N2 - BACKGROUND: Children with cerebral palsy (CP) often walk with a slower speed and a higher energy cost. Their walking performance and choice of mobility method may vary in different environments.

Independent mobility is important for activity and participation. QUESTIONS/PURPOSES: We described walking performance at different distances and environments in relation to gross motor function, CP subtype, and age. PATIENTS AND METHODS: We performed a cross-sectional study including all 562 children 3 to 18 years with CP living in southern Sweden during 2008. Data were extracted from a Swedish CP register and healthcare program. The Functional Mobility Scale (FMS) was used for rating mobility at home (5 m), at school (50 m), and in the community (500 m). The FMS scores were analyzed in relation to Gross Motor Function Classification System (GMFCS) level, CP subtype, and age. RESULTS: In this population, 57% to 63% walked 5 to 500 m without walking aids and 4% to 8% used walking aids. We found a correlation between FMS and GMFCS. The walking performance varied between the subtypes from 96% to 98% in those with spastic unilateral CP to 16% to 24% in children with dyskinetic CP. An increased proportion of children walked independently on all surfaces in each successive age group. CONCLUSIONS: The overall walking performance increased up to 7 years of age, but the proportion of children walking independently on uneven surfaces was incrementally higher in each age group up to 18 years. The ability to walk on uneven surfaces is important for achieving independent walking in the community

SN - 1528-1132

AD - Department of Orthopaedics, Lund University, University Hospital, 221 85 Lund, Sweden.

elisabet.rodby\_bousquet@med.lu.se

UR - 21445713

ER -

TY - JOUR

ID - 1537

T1 - Autonomy supportive environments and mastery as basic factors to motivate physical activity in children: a controlled laboratory study

A1 - Roemmich,J.N.

A1 - Lambiase Ms,M.J.

A1 - McCarthy,T.F.

A1 - Fedas,D.M.

A1 - Kozlowski,K.F.

Y1 - 2012///

N1 - Roemmich, James N. Lambiase Ms, Maya J. McCarthy, Thomas F. Fedas, Denise M. Kozlowski, Karl F

The international journal of behavioral nutrition and physical activity

101217089

IM

Controlled Clinical Trial. Journal Article. Research Support, N.I.H., Extramural

English

KW - Child

KW - Child Behavior

KW - Choice Behavior

KW - Energy Metabolism

KW - Environment

KW - Exercise/ph [Physiology]

KW - Exercise

KW - Female

KW - Humans  
 KW - Male  
 KW - Motivation  
 KW - Personal Autonomy  
 KW - Physical Exertion  
 KW - Play and Playthings  
 KW - Sex Factors  
 KW - Medline  
 KW - Unsupervised Play Addition  
 RP - NOT IN FILE  
 SP - 16  
 JF - International Journal of Behavioral Nutrition & Physical Activity  
 JA - Int.  
 VL - 9  
 CY - England

**N2 - BACKGROUND:** Choice promotes the experience of autonomy, which enhances intrinsic motivation. Providing a greater choice of traditional active toys may increase children's activity time. Mastery also increases intrinsic motivation and is designed into exergames, which may increase play time of a single exergame, reducing the need for choice to motivate activity compared to traditional active toys. Providing both choice and mastery could be most efficacious at increasing activity time. The energy expenditure (EE) of an active play session is dependent on the duration of play and the rate of EE during play. The rate of EE of exergames and the same game played in traditional fashion is not known. The purpose was to test the basic parameters of choice and mastery on children's physical activity time, activity intensity, and energy expenditure. **METHODS:** 44 children were assigned to low (1 toy) or high (3 toys) choice groups. Children completed 60 min sessions with access to traditional active toys on one visit and exergame versions of the same active toys on another visit. **RESULTS:** Choice had a greater effect on increasing girls' (146%) than boys' (23%) activity time and on girls' (230%) than boys' (minus 24%) activity intensity. When provided choice, girls' activity time and intensity were no longer lower than boys' activity time and intensity. The combination of choice and mastery by providing access to 3 exergames produced greater increases in physical activity time (1 toy 22.5 min, 3 toys 41.4 min) than choice alone via access to 3 traditional games (1 toy 13.6 min, 3 toys 19.5 min). Energy expenditure was 83% greater when engaging in traditional games than exergames. **CONCLUSIONS:** Boys and girls differ in their behavioral responses to autonomy supportive environments. By providing girls with greater autonomy they can be motivated to engage in physical activity equal to boys. An environment that provides both autonomy and mastery is most efficacious at increasing physical activity time. Though children play exergames 87% longer than traditional games, the rate of energy expenditure is 83% lower for exergames than traditional indoor versions of the same games

SN - 1479-5868  
 AD - Department of Pediatrics, School of Medicine and Biomedical Sciences, University at Buffalo, Buffalo, New York 14214-3000, USA. roemmich@buffalo.edu  
 UR - 22353207  
 ER -

TY - JOUR  
 ID - 1538  
 T1 - Adrenarche and middle childhood  
 A1 - Campbell,B.C.  
 Y1 - 2011/09//  
 N1 - Campbell, Benjamin C  
 Human nature (Hawthorne, N.Y.)  
 9010063  
 IM  
 Journal Article  
 English  
 KW - Adrenarche/ph [Physiology]  
 KW - Adrenarche/px [Psychology]  
 KW - Antioxidants/me [Metabolism]

KW - Brain/gd [Growth & Development]  
KW - Child  
KW - Child Behavior/ph [Physiology]  
KW - Child Behavior/px [Psychology]  
KW - Child Development/ph [Physiology]  
KW - Dehydroepiandrosterone/me [Metabolism]  
KW - Female  
KW - Gender Identity  
KW - Glucose/me [Metabolism]  
KW - Humans  
KW - Interpersonal Relations  
KW - Male  
KW - Medline  
KW - Unsupervised Play Addition

RP - NOT IN FILE

SP - 327

EP - 349

JF - Human Nature

JA - Hum Nat

VL - 22

IS - 3

CY - United States

N2 - Middle childhood, the period from 6 to 12 years of age, is defined socially by increasing autonomy and emotional regulation, somatically by the development of anatomical structures for subsistence, and endocrinologically by adrenarche, the adrenal production of dehydroepiandrosterone (DHEA). Here I suggest that DHEA plays a key role in the coordinated development of the brain and body beginning with middle childhood, via energetic allocation. I argue that with adrenarche, increasing levels of circulating DHEA act to down-regulate the release of glucose into circulation and hence limit the supply of glucose which is needed by the brain for synaptogenesis. Furthermore, I suggest the antioxidant properties of DHEA may be important in maintaining synaptic plasticity throughout middle childhood within slow-developing areas of the cortex, including the insula, thalamus, and anterior cingulate cortex. In addition, DHEA may play a role in the development of body odor as a reliable social signal of behavioral changes associated with middle childhood

SN - 1936-4776

AD - Department of Anthropology, University of Wisconsin-Milwaukee, 290 Sabin Hall, 3413 N. Downer Ave., Milwaukee, WI 53211, USA. campbelb@uwm.edu

UR - 22388879

ER -

TY - JOUR

ID - 1540

T1 - Linking GPS and travel diary data using sequence alignment in a study of children's independent mobility

A1 - Mavoa,S.

A1 - Oliver,M.

A1 - Witten,K.

A1 - Badland,H.M.

Y1 - 2011///

N1 - Mavoa, Suzanne. Oliver, Melody. Witten, Karen. Badland, Hannah M

International journal of health geographics

101152198

IM

Journal Article. Research Support, Non-U.S. Gov't

English

KW - Algorithms

KW - Chi-Square Distribution

KW - Child

KW - Child Welfare

KW - Data Collection/is [Instrumentation]  
 KW - Data Collection/mt [Methods]  
 KW - Feasibility Studies  
 KW - Female  
 KW - Geographic Information Systems  
 KW - Health Services Research  
 KW - Humans  
 KW - Male  
 KW - Medical Records/sn [Statistics & Numerical Data]  
 KW - Public Health Practice  
 KW - Statistics as Topic  
 KW - Travel/sn [Statistics & Numerical Data]  
 KW - Medline  
 KW - Unsupervised Play Addition  
 RP - NOT IN FILE  
 SP - 64  
 JF - International Journal of Health Geographics [Electronic Resource]  
 JA - Int.J Health Geogr.  
 VL - 10  
 CY - England

N2 - **BACKGROUND:** Global positioning systems (GPS) are increasingly being used in health research to determine the location of study participants. Combining GPS data with data collected via travel/activity diaries allows researchers to assess where people travel in conjunction with data about trip purpose and accompaniment. However, linking GPS and diary data is problematic and to date the only method has been to match the two datasets manually, which is time consuming and unlikely to be practical for larger data sets. This paper assesses the feasibility of a new sequence alignment method of linking GPS and travel diary data in comparison with the manual matching method. **METHODS:** GPS and travel diary data obtained from a study of children's independent mobility were linked using sequence alignment algorithms to test the proof of concept. Travel diaries were assessed for quality by counting the number of errors and inconsistencies in each participant's set of diaries. The success of the sequence alignment method was compared for higher versus lower quality travel diaries, and for accompanied versus unaccompanied trips. Time taken and percentage of trips matched were compared for the sequence alignment method and the manual method. **RESULTS:** The sequence alignment method matched 61.9% of all trips. Higher quality travel diaries were associated with higher match rates in both the sequence alignment and manual matching methods. The sequence alignment method performed almost as well as the manual method and was an order of magnitude faster. However, the sequence alignment method was less successful at fully matching trips and at matching unaccompanied trips. **CONCLUSIONS:** Sequence alignment is a promising method of linking GPS and travel diary data in large population datasets, especially if limitations in the trip detection algorithm are addressed. 2011 Mavoa et al; licensee BioMed Central Ltd

SN - 1476-072X

AD - SHORE and Whariki Research Centre, School of Public Health, Massey University, Auckland, New Zealand. s.mavoa@massey.ac.nz

UR - 22142322

ER -

TY - JOUR

ID - 1541

T1 - Design of a novel mobility device controlled by the feet motion of a standing child: a feasibility study

A1 - Schoepflin,Z.R.

A1 - Chen,X.

A1 - Ragonesi,C.B.

A1 - Galloway,J.C.

A1 - Agrawal,S.K.

Y1 - 2011/10//

N1 - Schoepflin, Zachary R. Chen, Xi. Ragonesi, Christina B. Galloway, James C. Agrawal, Sunil K Medical & biological engineering & computing

lpn, 7704869

IM

Evaluation Studies. Journal Article. Research Support, N.I.H., Extramural. Research Support, U.S. Gov't, Non-P.H.S.

English

KW - Cerebral Palsy/pp [Physiopathology]

KW - Cerebral Palsy/rh [Rehabilitation]

KW - Child

KW - Preschool

KW - Equipment Design

KW - Feasibility Studies

KW - Foot/ph [Physiology]

KW - Humans

KW - Male

KW - Man-Machine Systems

KW - Motor Skills

KW - Robotics/is [Instrumentation]

KW - Self-Help Devices

KW - Walking/ph [Physiology]

KW - Medline

KW - Unsupervised Play Addition

RP - NOT IN FILE

SP - 1225

EP - 1231

JF - Medical & Biological Engineering & Computing

JA - Med Biol Eng Comput

VL - 49

IS - 10

CY - United States

N2 - Self-generated mobility is a major contributor to the physical, emotional, cognitive, and social development of infants and toddlers. When young children have disorders that hinder self locomotion, their development is at risk for delay. Independent mobility via traditional power mobility devices may prevent this delay, but do little to encourage the child's development of gross motor skills. This research aims to develop a bio-driven mobile-assistive device that is controlled and driven by moving the feet, which may encourage the development of gross motor skills. In this study, system feasibility is shown by experiments on five typically developing toddlers and one special needs toddler with spastic cerebral palsy. Children were placed in the bio-driven device and instructed to navigate through a maze. All subjects were able to successfully complete the maze in multiple trials. In addition, two toddlers showed evidence of improved driving skill by completing the maze in shorter times in successive trials on a given testing day. The results suggest that such a device is feasible for purposeful driving. Recommendations are given for the device and protocol redesign for related future testing

SN - 1741-0444

AD - Mechanical Engineering, University of Delaware, Newark, USA

UR - 21850470

ER -

TY - JOUR

ID - 1542

T1 - "The moving body": a sustainable project to improve children's physical activity at kindergarten

A1 - Serpentino,C.

Y1 - 2011/10//

N1 - Serpentino, Carmela

International journal of pediatric obesity : IJPO : an official journal of the International Association for the Study of Obesity

101256330

IM

Journal Article

English

KW - Child

KW - Preschool

KW - Humans

KW - Motor Activity

KW - Play and Playthings

KW - Schools

KW - Self Concept

KW - SOCIALIZATION

KW - Medline

KW - Unsupervised Play Addition

RP - NOT IN FILE

SP - 60

EP - 62

JF - International Journal of Pediatric Obesity

JA - Int.J Pediatr Obes.

VL - 6 Suppl 2

CY - England

N2 - Physical activity promotes children's awareness of the body. Children, to experience and to learn, need to be physically active and their innate physical activity is playing. Playing together means building relationships with peers, means learning how to use tools and space, means addressing egocentric behaviour toward rules' respect; in summary, it means learning "social conviviality and respect". The aim of the project "The moving body" was to favour children's physical and cognitive development and their social relationships. Gross motor physical abilities were assessed in 270 children attending the kindergarten. The children were grouped according their level of motor abilities to promote learning through older children's imitation. Structured games and playing were alternated to free time, and words such as physical activity, movement, and so on, were never used. Every month the children were asked to draw their own body to assess their body shape perception and their ability in representing it. All the children improved their physical abilities as compared to the beginning of the project; they strengthened their creativity and fantasy, inventing new and imaginative games, became more confident in their own capacities, and they learned how to deal and overcome, with a greater autonomy, difficult tasks. The body shape perception, and its representation as drawing, showed, especially among children 3 years old, remarkable progress. The importance of physical activity and play in kindergarten activities was evidenced through the significant improvement of children's several specific motor and psychosocial competences

SN - 1747-7174

AD - Edmondo de Amicis School Institution Viale Abbadessa n92 CAP 72021 Francavilla Fontana, Brindisi, Italy. mariacarmelamaria@hotmail.it

UR - 21923300

ER -

TY - JOUR

ID - 1543

T1 - Parental and peer influences on physical activity among Scottish adolescents: a longitudinal study

A1 - Kirby,J.

A1 - Levin,K.A.

A1 - Inchley,J.

Y1 - 2011/08//

N1 - Kirby, Joanna. Levin, Kate A. Inchley, Jo

Journal of physical activity & health

101189457

IM

Journal Article

English

KW - Adolescent

KW - Child

KW - Exercise

KW - Female  
 KW - Humans  
 KW - Longitudinal Studies  
 KW - Male  
 KW - Parent-Child Relations  
 KW - Peer Group  
 KW - Regression Analysis  
 KW - Scotland  
 KW - Social Environment  
 KW - Medline  
 KW - Unsupervised Play Addition  
 RP - NOT IN FILE  
 SP - 785  
 EP - 793  
 JF - Journal of Physical Activity & Health  
 JA - J Phys Act.Health  
 VL - 8  
 IS - 6  
 CY - United States  
 N2 - **BACKGROUND:** This study investigated parental and peer influences on physical activity, examining gender and developmental differences during early-mid adolescence. **METHODS:** A 5-year longitudinal study tracking physical activity (measured by PAQ-C) among adolescents (n = 641) from final year of primary (P7) to fourth year of secondary school (S4). Peer support, peer socializing, parental support, and independent play were assessed. Logistic regression predicted physical activity, by year and gender, in relation to social influences. **RESULTS:** Boys reported higher physical activity, peer support, paternal support, and independent play than girls. Among both genders, peer, paternal, and maternal support decreased with age, whereas independent play increased. Time with friends was particularly important. Among high socializers (P7), odds of being active were over 3 times those of low socializers [boys: 3.53 (95% CI 1.77, 7.04), girls: 3.27 (95% CI 1.80, 5.92)]. Baseline physical activity was also a strong predictor among early secondary boys (OR 3.90 95% CI 2.10, 7.24) and girls (OR 4.15, 95% CI 2.00, 8.62). Parental support was less important than peer influences; only same-sex parental support remained significant in multivariable models. **CONCLUSIONS:** Parents and peers have important influences on adolescent physical activity. Significant gender and developmental effects are apparent through early-mid adolescence  
 SN - 1543-5474  
 AD - Child and Adolescent Health Research Unit, University of Edinburgh, United Kingdom  
 UR - 21832293  
 ER -  
  
 TY - JOUR  
 ID - 1544  
 T1 - Kids in the city study: research design and methodology  
 A1 - Oliver,M.  
 A1 - Witten,K.  
 A1 - Kearns,R.A.  
 A1 - Mavoa,S.  
 A1 - Badland,H.M.  
 A1 - Carroll,P.  
 A1 - Drumheller,C.  
 A1 - Tavae,N.  
 A1 - Asiasiga,L.  
 A1 - Jelley,S.  
 A1 - Kaiwai,H.  
 A1 - Opit,S.  
 A1 - Lin,E.Y.  
 A1 - Sweetsur,P.  
 A1 - Barnes,H.M.



A1 - Mason,N.

A1 - Ergler,C.

Y1 - 2011///

N1 - Oliver, Melody. Witten, Karen. Kearns, Robin A. Mavoa, Suzanne. Badland, Hannah M. Carroll, Penelope. Drumheller, Chelsea. Tavae, Nicola. Asiasiga, Lanuola. Jelley, Su. Kaiwai, Hector. Opit, Simon. Lin, En-Yi Judy. Sweetsur, Paul. Barnes, Helen Moewaka. Mason, Nic. Ergler, Christina

BMC public health

100968562

IM

Journal Article. Research Support, Non-U.S. Gov't

English

KW - Actigraphy/is [Instrumentation]

KW - Actigraphy/mt [Methods]

KW - Body Size

KW - Child

KW - Cities

KW - Cross-Sectional Studies

KW - Environment Design

KW - Exercise

KW - Female

KW - Focus Groups

KW - Humans

KW - Interviews as Topic

KW - Male

KW - New Zealand

KW - Research Design

KW - Sedentary Lifestyle

KW - Medline

KW - Unsupervised Play Addition

RP - NOT IN FILE

SP - 587

JA - BMC Public Health

VL - 11

CY - England

N2 - **BACKGROUND:** Physical activity is essential for optimal physical and psychological health but substantial declines in children's activity levels have occurred in New Zealand and internationally. Children's independent mobility (i.e., outdoor play and traveling to destinations unsupervised), an integral component of physical activity in childhood, has also declined radically in recent decades. Safety-conscious parenting practices, car reliance and auto-centric urban design have converged to produce children living increasingly sedentary lives. This research investigates how urban neighborhood environments can support or enable or restrict children's independent mobility, thereby influencing physical activity accumulation and participation in daily life. **METHODS/DESIGN:** The study is located in six Auckland, New Zealand neighborhoods, diverse in terms of urban design attributes, particularly residential density. Participants comprise 160 children aged 9-11 years and their parents/caregivers. Objective measures (global positioning systems, accelerometers, geographical information systems, observational audits) assessed children's independent mobility and physical activity, neighborhood infrastructure, and streetscape attributes. Parent and child neighborhood perceptions and experiences were assessed using qualitative research methods. **DISCUSSION:** This study is one of the first internationally to examine the association of specific urban design attributes with child independent mobility. Using robust, appropriate, and best practice objective measures, this study provides robust epidemiological information regarding the relationships between the built environment and health outcomes for this population

SN - 1471-2458

AD - School of Environment, The University of Auckland, Auckland, NZ. r.kearns@auckland.ac.nz

UR - 21781341

ER -

TY - JOUR

ID - 1545

T1 - Leisure, recreation, and play from a developmental context

A1 - Caldwell,L.L.

A1 - Witt,P.A.

Y1 - 2011///

N1 - Caldwell, Linda L. Witt, Peter A

New directions for youth development

101090644

IM

Journal Article

English

KW - Adolescent

KW - Adolescent Development/ph [Physiology]

KW - Age Factors

KW - Child

KW - Child Development/ph [Physiology]

KW - Female

KW - Goals

KW - Humans

KW - Leisure Activities/px [Psychology]

KW - Male

KW - Motivation

KW - Motor Activity

KW - Personal Autonomy

KW - Play and Playthings/px [Psychology]

KW - Recreation/ph [Physiology]

KW - Recreation/px [Psychology]

KW - Residence Characteristics

KW - Self Concept

KW - Social Identification

KW - Medline

KW - Unsupervised Play Addition

RP - NOT IN FILE

SP - 13

EP - 27

JF - New Directions for Youth Development

JA - New Dir.Youth Dev.

VL - 2011

IS - 130

CY - United States

N2 - Participation in activities and experiences defined as play, recreation, and leisure has important developmental implications for youth. Elements and characteristics of leisure experiences contribute directly to the development of identity, autonomy, competence, initiative, civic duty, and social connections. Whether in informal or formal, appropriately structured and organized programs, leisure experiences can help facilitate adolescent development in these areas. For example, one of the defining elements of leisure is that it is characterized by free choice and self-determination. Programs that promote leadership, choice, autonomy, and initiative can help adolescents deal with developmental challenges associated with this age group. Leisure experiences can also promote civic engagement and provide important peer-to-peer, peer-to-adult, and peer-to-community connections. The social context of leisure is important to adolescent development in that it provides opportunities to learn empathy, loyalty, and intimacy in their group activities, as well as to negotiate with peers, resolve conflict, and work together for communal goals. In addition, adolescents often report positive emotional experiences in leisure, which can serve as a relief from the stress they feel in other areas of their lives and contribute to positive psychological adjustment and well-being. A case study is used to show how planned, purposive programs can be used as critical components of efforts to contribute to adolescent development.

Copyright 2011 Wiley Periodicals, Inc., A Wiley Company

SN - 1537-5781

AD - Pennsylvania State University, USA  
UR - 21786407  
ER -

TY - JOUR

ID - 1547

T1 - Effects of task organization on the independent play of students with autism spectrum disorders

A1 - Mavropoulou,S.

A1 - Papadopoulou,E.

A1 - Kakana,D.

Y1 - 2011/07//

N1 - Mavropoulou, Sophia. Papadopoulou, Eleni. Kakana, Domna

Journal of autism and developmental disorders

7904301, hgw

IM

Journal Article

English

KW - Behavior Therapy/mt [Methods]

KW - Child

KW - Child Development Disorders

KW - Pervasive/px [Psychology]

KW - Pervasive/th [Therapy]

KW - Communication

KW - Humans

KW - Male

KW - Play and Playthings

KW - Teaching

KW - Treatment Outcome

KW - Medline

KW - Unsupervised Play Addition

RP - NOT IN FILE

SP - 913

EP - 925

JF - Journal of Autism & Developmental Disorders

JA - J Autism Dev.Disord

VL - 41

IS - 7

CY - United States

N2 - The purpose of the study was to examine the impact of task organization, a component of Structured Teaching developed by Division TEACCH, on the independent play of children with autism spectrum disorders (ASD). On-task behavior, task accuracy, task performance and teacher prompting were measured across independent play sessions in the classroom. An ABAB design was implemented to evaluate the effects of task organization on the independent play skills of two young children with ASD. Results regarding on-task behavior, task accuracy and independence were variable and are discussed. The implications of findings on the use of task organization for increasing independence in children with ASD are discussed

SN - 1573-3432

AD - Department of Special Education, University of Thessaly, Argonafton & Filellinon, 38 221 Volos, Greece. smavrop@uth.gr

UR - 20960042

ER -

TY - JOUR

ID - 1548

T1 - Pediatric fire deaths in Ontario: retrospective study of behavioural, social, and environmental risk factors

A1 - Chen,Y.A.

A1 - Bridgman-Acker,K.

A1 - Edwards,J.

A1 - Lauwers,A.E.

Y1 - 2011/05//

N1 - Chen, Yingming Amy. Bridgman-Acker, Karen. Edwards, Jim. Lauwers, Albert Edward  
Canadian family physician Medecin de famille canadien

blo, 0120300

IM

Journal Article

English

KW - Adolescent

KW - Child

KW - Child Mortality

KW - Child Welfare

KW - Preschool

KW - Cohort Studies

KW - Dangerous Behavior

KW - Female

KW - Fires/sn [Statistics & Numerical Data]

KW - Housing

KW - Humans

KW - Infant

KW - Newborn

KW - Male

KW - Retrospective Studies

KW - Risk Factors

KW - Safety Management

KW - Socioeconomic Factors

KW - Medline

KW - Unsupervised Play Addition

RP - NOT IN FILE

SP - e169

EP - e177

JF - Canadian Family Physician

JA - Can Fam Physician

VL - 57

IS - 5

CY - Canada

N2 - **OBJECTIVE:** To identify the predictors of residential fire deaths in the Ontario pediatric population using systematically collected data from the Office of the Chief Coroner. **DESIGN:** Retrospective cohort study.

**SETTING:** Ontario. **PARTICIPANTS:** Children younger than 16 years of age who died in accidental residential fires in Ontario between January 1, 2001, and December 31, 2006. **MAIN OUTCOME MEASURES:** The study retrospectively reviewed the coroner's case files for 60 subjects who qualified according to the selection criteria.

Reviewed documents included the coroner's investigation statements, autopsy reports, toxicology reports, fire marshal's reports, police reports, and Children's Aid Society (CAS) reports. Information on a range of demographic, behavioural, social, and environmental factors was collected. Statistical tests, including relative risk, relative risk confidence intervals, and chi(2) tests were performed to determine the correlation between factors of interest and to establish their significance. **RESULTS:** Thirty-nine fire events resulting in 60 deaths occurred between 2001 and 2006. Fire play and electrical failures were the top 2 causes of residential fires.

More fires occurred during the night (midnight to 9 AM) than during the day (9 AM to midnight). Nighttime fires were most commonly due to electrical failures or unattended candles, whereas daytime fires were primarily caused by unsupervised fire play and stove fires. Smoke alarms were present at 32 of 39 fire events (82%), but overall alarm functionality was only 54%. Children from families with a history of CAS involvement were approximately 32 times more likely to die in fires. **CONCLUSION:** Risk factors for pediatric fire death in Ontario include smoke alarm functionality, fire play, fire escape behaviour, and CAS involvement. Efforts to prevent residential fire deaths should target these populations and risk factors, and primary care physicians should consider education around these issues as a primary preventive strategy for families with young children

SN - 1715-5258

AD - Faculty of Medicine, University of Toronto, Ontario

UR - 21571705

ER -

TY - JOUR

ID - 1549

T1 - A cross-sectional study of the individual, social, and built environmental correlates of pedometer-based physical activity among elementary school children

A1 - McCormack,G.R.

A1 - Giles-Corti,B.

A1 - Timperio,A.

A1 - Wood,G.

A1 - Villanueva,K.

Y1 - 2011///

N1 - McCormack, Gavin R. Giles-Corti, Billie. Timperio, Anna. Wood, Georgina. Villanueva, Karen  
The international journal of behavioral nutrition and physical activity

101217089

IM

Journal Article. Research Support, Non-U.S. Gov't

English

KW - Canada

KW - Child

KW - Child Behavior

KW - Cross-Sectional Studies

KW - Facility Design and Construction

KW - Female

KW - Health Behavior

KW - Humans

KW - Leisure Activities

KW - Male

KW - Monitoring

KW - Ambulatory

KW - Motor Activity

KW - Parents

KW - Play and Playthings

KW - Questionnaires

KW - Residence Characteristics

KW - Sex Characteristics

KW - Social Facilitation

KW - Socioeconomic Factors

KW - Transportation

KW - Walking

KW - Medline

KW - Unsupervised Play Addition

RP - NOT IN FILE

SP - 30

JF - International Journal of Behavioral Nutrition & Physical Activity

JA - Int.

VL - 8

CY - England

N2 - BACKGROUND: Children who participate in regular physical activity obtain health benefits. Preliminary pedometer-based cut-points representing sufficient levels of physical activity among youth have been established; however limited evidence regarding correlates of achieving these cut-points exists. The purpose of this study was to identify correlates of pedometer-based cut-points among elementary school-aged children.

METHOD: A cross-section of children in grades 5-7 (10-12 years of age) were randomly selected from the most

(n = 13) and least (n = 12) 'walkable' public elementary schools (Perth, Western Australia), stratified by socioeconomic status. Children (n = 1480; response rate = 56.6%) and parents (n = 1332; response rate = 88.8%) completed a survey, and steps were collected from children using pedometers. Pedometer data were categorized to reflect the sex-specific pedometer-based cut-points of >15000 steps/day for boys and >12000 steps/day for girls. Associations between socio-demographic characteristics, sedentary and active leisure-time behavior, independent mobility, active transportation and built environmental variables - collected from the child and parent surveys - and meeting pedometer-based cut-points were estimated (odds ratios: OR) using generalized estimating equations. RESULTS: Overall 927 children participated in all components of the study and provided complete data. On average, children took 11407 + 3136 steps/day (boys: 12270 + 3350 vs. girls: 10681 + 2745 steps/day; p < 0.001) and 25.9% (boys: 19.1 vs. girls: 31.6%; p < 0.001) achieved the pedometer-based cut-points. After adjusting for all other variables and school clustering, meeting the pedometer-based cut-points was negatively associated (p < 0.05) with being male (OR = 0.42), parent self-reported number of different destinations in the neighborhood (OR 0.93), and a friend's (OR 0.62) or relative's (OR 0.44, boys only) house being at least a 10-minute walk from home. Achieving the pedometer-based cut-points was positively associated with participating in screen-time < 2 hours/day (OR 1.88), not being driven to school (OR 1.48), attending a school located in a high SES neighborhood (OR 1.33), the average number of steps among children within the respondent's grade (for each 500 step/day increase: OR 1.29), and living further than a 10-minute walk from a relative's house (OR 1.69, girls only). CONCLUSIONS: Comprehensive multi-level interventions that reduce screen-time, encourage active travel to/from school and foster a physically active classroom culture might encourage more physical activity among children

SN - 1479-5868

AD - Department of Community Health Sciences, University of Calgary, Alberta, Canada.

gmccorma@ucalgary.ca

UR - 21486475

ER -

TY - JOUR

ID - 1550

T1 - Mothers' reports of play dates and observation of school playground behavior of children having high-functioning autism spectrum disorders

A1 - Frankel, F.D.

A1 - Gorospe, C.M.

A1 - Chang, Y.C.

A1 - Sugar, C.A.

Y1 - 2011/05//

N1 - Frankel, Frederick D. Gorospe, Clarissa M. Chang, Ya-Chih. Sugar, Catherine A

Journal of child psychology and psychiatry, and allied disciplines

hp3, 0375361

IM

Journal Article. Research Support, N.I.H., Extramural. Research Support, Non-U.S. Gov't

English

KW - Adaptation

KW - Psychological

KW - Child

KW - Child Development Disorders

KW - Pervasive/px [Psychology]

KW - Family

KW - Female

KW - Humans

KW - Intelligence

KW - Interpersonal Relations

KW - Male

KW - Mothers

KW - Observation

KW - Peer Group

KW - Play and Playthings/px [Psychology]

KW - Schools

KW - Social Environment

KW - Medline

KW - Unsupervised Play Addition

RP - NOT IN FILE

SP - 571

EP - 579

JF - Journal of Child Psychology & Psychiatry & Allied Disciplines

JA - J Child Psychol.Psychiatry

VL - 52

IS - 5

CY - England

N2 - BACKGROUND: Children with high-functioning autism spectrum disorders (ASD) are generally included with typically developing peers at school. They have difficulties interacting with peers on the school playground. Previous literature suggests that having play dates in the home may be related to better peer acceptance at school. METHODS: This study examines the relationship between mother-reported play date frequency and amount of conflict, and peer interaction observed on the school playground for a sample of 27 boys and 4 girls meeting structured interview and observation criteria for ASD. Measures of intellectual functioning, adaptive behavior, and social skills were included in a stepwise regression analysis to account for their impact on relationships between maternal play date reports, general peer acceptance at school (as rated by the child's teacher) and observations of school playground behavior. RESULTS: Results revealed that children with autism spectrum disorders who had more play dates in their home tended to spend a greater amount of time engaged in behaviors such as mutual offering of objects, conversing and other turn-taking activities with peers on the school playground. They also received more positive responses to their overtures from peers. These relationships remained highly significant even after accounting for other demographic, general social, and cognitive variables. CONCLUSIONS: The present results suggest that play date frequency is strongly related to school playground behavior. Owing to the design of this study, future research must assess whether play dates in the home promote better peer relationships on the playground or the reverse. In either case, the assessment of play dates, as well as observation of spontaneous unsupervised social interactions, are important outcome measures to consider in social skills interventions for children with high-functioning ASD. 2010 The Authors. Journal of Child Psychology and Psychiatry 2010 Association for Child and Adolescent Mental Health

SN - 1469-7610

AD - UCLA Semel Institute for Neuroscience and Human Behavior, Los Angeles, CA, USA.

ffrankel@ucla.edu

UR - 20860756

ER -

TY - JOUR

ID - 1551

T1 - What is the meaning and nature of active play for today's children in the UK?

A1 - Brockman,R.

A1 - Fox,K.R.

A1 - Jago,R.

Y1 - 2011///

N1 - Brockman, Rowan. Fox, Kenneth R. Jago, Russell

The international journal of behavioral nutrition and physical activity

101217089

IM

Journal Article. Research Support, Non-U.S. Gov't

English

KW - Bicycling

KW - Child

KW - Exercise

KW - Family

KW - Female

KW - Focus Groups

KW - Friends  
KW - Great Britain  
KW - Humans  
KW - Leisure Activities  
KW - Male  
KW - Perception  
KW - Play and Playthings  
KW - Sedentary Lifestyle  
KW - Sex Factors  
KW - Social Values  
KW - Medline  
KW - Unsupervised Play Addition  
RP - NOT IN FILE  
SP - 15  
JF - International Journal of Behavioral Nutrition & Physical Activity  
JA - Int.  
VL - 8  
CY - England

N2 - **BACKGROUND:** Preventing the decline in physical activity which occurs around 10-11 years of age is a public health priority. Physically active play can make unique contributions to children's development which cannot be obtained from more structured forms of physical activity. Encouraging active play in children's leisure time has potential to increase physical activity levels while promoting optimal child development. Aspired wisdom states that contemporary British children no longer play outdoors, but systematic evidence for this is lacking. We need to build a more informed picture of contemporary children's play before we consider interventions to increase it. **METHODS:** Eleven focus groups were conducted with 77, 10-11 year old children from four primary schools in Bristol, UK. Focus groups examined: 1) children's perceptions of 'play'; 2) how much of their play is active play; and 3) contexts of children's active play. All focus groups were audio-taped and transcribed verbatim. Data were analysed using a thematic approach. **RESULTS:** Children's perceptions of play were broad and included both physically active and sedentary behaviours. Children reported that they frequently engaged in active play and valued both the physical and social benefits it provided. Whereas boys frequently reported having a 'kick about' or riding bikes as their preferred forms of active play, girls were less likely to report a specific activity. Additionally, boys reported greater independent mobility in their active play compared to girls. Finally, boys were more likely to report playing with neighbourhood friends but girls more frequently reported playing with family members. **CONCLUSIONS:** Promoting active play in children's leisure time may increase the physical activity of children, but interventions may need to be tailored according to gender

SN - 1479-5868

AD - Centre for Exercise, Nutrition & Health Sciences, School for Policy Studies, University of Bristol, Bristol, UK. Rowan.Brockman@bristol.ac.uk

UR - 21385336

ER -

TY - JOUR

ID - 1552

T1 - Young adolescents' independent mobility, related factors and association with transport to school. A cross-sectional study

A1 - Johansson,K.

A1 - Hasselberg,M.

A1 - Laflamme,L.

Y1 - 2010///

N1 - Johansson, Klara. Hasselberg, Marie. Laflamme, Lucie

BMC public health

100968562

IM

Journal Article. Research Support, Non-U.S. Gov't

English



KW - Adolescent  
 KW - Cluster Analysis  
 KW - Cross-Sectional Studies  
 KW - Female  
 KW - Humans  
 KW - Male  
 KW - Personal Autonomy  
 KW - Questionnaires  
 KW - Schools  
 KW - Sweden  
 KW - Transportation  
 KW - Medline  
 KW - Unsupervised Play Addition  
 RP - NOT IN FILE  
 SP - 635  
 JA - BMC Public Health  
 VL - 10  
 CY - England

N2 - **BACKGROUND:** Children's independent mobility differs between groups of adolescents, but knowledge is lacking on how mobility-limiting factors interact. This study explores the association between factors that can affect young adolescents' mobility, searching for typical patterns within a geographical area where mobility is both relatively high and promoted (in this case Stockholm County, Sweden). An additional question is how clusters of limiting factors and demographic attributes relate to active commuting to school. **METHODS:** A sample of 7th grade students (ca 13-14 years old) in Stockholm County, Sweden, answered a survey (n = 1008). A cluster analysis was performed on variables descriptive of the respondents and of potential limitations to their independent mobility, such as fears, coping, traffic situation in the neighbourhood and parent/child opinions on mobility (18 variables and 50 categories). Active commuting to/from school was compared using proportion (with 95% confidence intervals) by cluster. **RESULTS:** Five consistent and distinct clusters were identified. Among the most discriminating factors were fears experienced in the neighbourhood, strategies to cope with fear, type of housing and traffic environment. Girls were over-represented in the two clusters most typical of respondents experiencing fears (either several of these or darkness in particular) and boys in two others where housing (house vs. apartment) and neighbourhood conditions played a more determinant role. The proportion of active commuting among respondents was quite similar over clusters but was nonetheless higher in the cluster (over girls) reporting more fears and other factors limiting mobility. **CONCLUSIONS:** Whereas fears--and coping--are more typical of adolescent girls in the formation of the clusters, household and neighbourhood characteristics are more typical of boys. Broadly speaking, there seem to be two groups of girls with fears but these differ based on types of fear, ways of coping with fear and their living conditions. The association between the limitations to mobility and active commuting is unclear, the latter being higher among those disclosing a broader range of limiting factors, including fears

SN - 1471-2458

AD - Department of Public Health Sciences, Division of Global Health/IHCAR, Karolinska Institutet, Nobels vag 9, SE-171 77 Stockholm, Sweden. klara.johansson@ki.se

UR - 20969747

ER -

TY - JOUR

ID - 1554

T1 - Supervision of young children with fall injuries

A1 - Castro, Y.

A1 - Powell, E.C.

A1 - Sheehan, K.M.

Y1 - 2010/10//

N1 - Castro, Yessenia. Powell, Elizabeth C. Sheehan, Karen M

The Journal of trauma

kaf, 0376373

AIM, IM

Journal Article. Research Support, Non-U.S. Gov't  
English

KW - Accidental Falls/pc [Prevention & Control]

KW - Accidental Falls/sn [Statistics & Numerical Data]

KW - Age Distribution

KW - Child

KW - Child Care

KW - Child Rearing

KW - Preschool

KW - Cohort Studies

KW - Emergency Service

KW - Hospital/sn [Statistics & Numerical Data]

KW - Female

KW - Humans

KW - Infant

KW - Male

KW - Play and Playthings

KW - Retrospective Studies

KW - Risk Factors

KW - Wounds and Injuries/di [Diagnosis]

KW - Wounds and Injuries/ep [Epidemiology]

KW - Wounds and Injuries/pc [Prevention & Control]

KW - Medline

KW - Unsupervised Play Addition

RP - NOT IN FILE

SP - S214

EP - S217

JF - Journal of Trauma-Injury Infection & Critical Care

JA - J Trauma

VL - 69

IS - 4 Suppl

CY - United States

N2 - BACKGROUND: Specific information about the supervision of young children with injuries related to falls is limited. In this study, we describe the supervision and physical environment of falls resulting in medical care in the emergency department. METHODS: We enrolled a convenience sample of 108 children younger than 7 years with fall injuries. RESULTS: The average age was 3 years, and 56% were male. Seventy-six (70%) were a fall from a height including 16 that involved stairs. Among caretakers in a nongroup setting (n = 95), most (61%) were supervising more than one child. The attention to the child was holding or playing with the child (13%), observing (45%), usually constantly, or listening for the child (19%); 9% reported no supervision at the time of the fall. Thirty-two percent stated they were touching or within reach of the child. Of falls indoors (n = 56), the supervisor was in the same room as the child for more than half of cases. There was no association between the number of children supervised and fall type (height vs. same level). When compared with those with same level falls, children with falls from a height were more often supervised with listening or no supervision (vs. observation, holding, or playing with the child)  $\chi^2$ ,  $p = 0.004$ . CONCLUSIONS: Many children were supervised at the time of their fall. Most caretakers had visual contact, and up to a third were touching or within reach of the child. The strategies used in these apparently low-risk situations were insufficient to prevent the falls we report

SN - 1529-8809

AD - Children's Memorial Hospital, Department of Pediatrics, Northwestern University's Feinberg School of Medicine, Chicago, Illinois, USA

UR - 20938311

ER -

TY - JOUR

ID - 1555

T1 - Use of manual and powered wheelchair in children with cerebral palsy: a cross-sectional study

A1 - Rodby-Bousquet,E.  
 A1 - Hagglund,G.  
 Y1 - 2010///  
 N1 - Rodby-Bousquet, Elisabet. Hagglund, Gunnar  
 BMC pediatrics  
 100967804

IM  
 Journal Article. Research Support, Non-U.S. Gov't  
 English

KW - Activities of Daily Living

KW - Adolescent

KW - Cerebral Palsy

KW - Child

KW - Child Development

KW - Cross-Sectional Studies

KW - Female

KW - Humans

KW - Locomotion

KW - Male

KW - Wheelchairs

KW - Medline

KW - Unsupervised Play Addition

RP - NOT IN FILE

SP - 59

JF - BMC Pediatrics

JA - BMC Pediatr

VL - 10

CY - England

N2 - **BACKGROUND:** Mobility is important for the cognitive and psychosocial development of children. Almost one third of children with cerebral palsy (CP) are non-ambulant. Wheelchairs can provide independent mobility, allowing them to explore their environment. Independent mobility is vital for activity and participation and reduces the dependence on caregivers. The purpose of this study was to describe the use of manual and powered wheelchair indoors and outdoors in relation to the degree of independent wheelchair mobility or need for assistance in a total population of children with CP. **METHODS:** A cross-sectional study was performed including all children aged 3-18 years with CP living in southern Sweden during 2008. Data was extracted from a register and health care programme for children with CP (CPUP). There were a total of 562 children (326 boys, 236 girls) in the register. Information on the child's use of manual and powered wheelchair indoors and outdoors and the performance in self-propelling or need for assistance were analysed related to age, CP subtype and gross motor function. **RESULTS:** Wheelchairs for mobility indoors were used by 165 (29%) of the 562 children; 61 used wheelchair for independent mobility (32 using manual only, 12 powered only, 17 both) and 104 were pushed by an adult. For outdoor mobility wheelchairs were used by 228 children (41%); 66 used a wheelchair for independent mobility (18 using manual only, 36 powered only, 12 both) and 162 were pushed. The use of wheelchair increased with age and was most frequent in the spastic bilateral and dyskinetic subtypes. Most powered wheelchairs were operated by children at GMFCS level IV. **CONCLUSION:** In this total population of children with CP, aged 3-18 years, 29% used a wheelchair indoors and 41% outdoors. A majority using manual wheelchairs needed adult assistance (86%) while powered wheelchairs provided independent mobility in most cases (86%). To achieve a high level of independent mobility, both manual and powered wheelchairs should be considered at an early age for children with impaired walking ability

SN - 1471-2431

AD - Department of Orthopaedics, Lund University, University Hospital, 221 85 Lund, Sweden.

elisabet.rodby\_bousquet@med.lu.se

UR - 20712899

ER -

TY - JOUR

ID - 1556

T1 - A robotic wheelchair trainer: design overview and a feasibility study

A1 - Marchal-Crespo,L.

A1 - Furumasu,J.

A1 - Reinkensmeyer,D.J.

Y1 - 2010///

N1 - Marchal-Crespo, Laura. Furumasu, Jan. Reinkensmeyer, David J

Journal of neuroengineering and rehabilitation

101232233

IM

Case Reports. Journal Article. Randomized Controlled Trial. Research Support, U.S. Gov't, Non-P.H.S..

Validation Studies

English

KW - Aging

KW - Algorithms

KW - Automation

KW - Cerebral Palsy/rh [Rehabilitation]

KW - Child

KW - Preschool

KW - Dyskinesias/rh [Rehabilitation]

KW - Equipment Design

KW - Feasibility Studies

KW - Feedback

KW - Female

KW - Humans

KW - Insemination

KW - Artificial

KW - Pilot Projects

KW - Practice (Psychology)

KW - Robotics/is [Instrumentation]

KW - Robotics/mt [Methods]

KW - Time Factors

KW - Touch

KW - Treatment Outcome

KW - Wheelchairs

KW - Medline

KW - Unsupervised Play Addition

RP - NOT IN FILE

SP - 40

JF - Journal of Neuroengineering & Rehabilitation

JA - J Neuroengineering Rehabil

VL - 7

CY - England

N2 - **BACKGROUND:** Experiencing independent mobility is important for children with a severe movement disability, but learning to drive a powered wheelchair can be labor intensive, requiring hand-over-hand assistance from a skilled therapist. **METHODS:** To improve accessibility to training, we developed a robotic wheelchair trainer that steers itself along a course marked by a line on the floor using computer vision, haptically guiding the driver's hand in appropriate steering motions using a force feedback joystick, as the driver tries to catch a mobile robot in a game of "robot tag". This paper provides a detailed design description of the computer vision and control system. In addition, we present data from a pilot study in which we used the chair to teach children without motor impairment aged 4-9 (n = 22) to drive the wheelchair in a single training session, in order to verify that the wheelchair could enable learning by the non-impaired motor system, and to establish normative values of learning rates. **RESULTS AND DISCUSSION:** Training with haptic guidance from the robotic wheelchair trainer improved the steering ability of children without motor impairment significantly more than training without guidance. We also report the results of a case study with one 8-year-old child with a severe motor impairment due to cerebral palsy, who replicated the single-session training protocol that the non-disabled children participated in. This child also improved steering ability after training with

guidance from the joystick by an amount even greater than the children without motor impairment.

**CONCLUSIONS:** The system not only provided a safe, fun context for automating driver's training, but also enhanced motor learning by the non-impaired motor system, presumably by demonstrating through intuitive movement and force of the joystick itself exemplary control to follow the course. The case study indicates that a child with a motor system impaired by CP can also gain a short-term benefit from driver's training with haptic guidance

SN - 1743-0003

AD - Mechanical and Aerospace Engineering Department, University of California, Irvine, CA, USA.

laura.marchal@mavt.ethz.ch

UR - 20707886

ER -

TY - JOUR

ID - 1557

T1 - Child supervision practices for drowning prevention in rural Bangladesh: a pilot study of supervision tools

A1 - Callaghan,J.A.

A1 - Hyder,A.A.

A1 - Khan,R.

A1 - Blum,L.S.

A1 - Arifeen,S.

A1 - Baqui,A.H.

Y1 - 2010/07//

N1 - Callaghan, J A. Hyder, A A. Khan, R. Blum, L S. Arifeen, S. Baqui, A H

Journal of epidemiology and community health

i1p, 7909766

IM

Journal Article. Research Support, U.S. Gov't, Non-P.H.S.

English

KW - Adult

KW - Bangladesh

KW - Child

KW - Community Health Services/mt [Methods]

KW - Drowning/pc [Prevention & Control]

KW - Health Education

KW - Humans

KW - Infant Equipment

KW - Models

KW - Statistical

KW - Pilot Projects

KW - Process Assessment (Health Care)/st [Standards]

KW - Protective Devices

KW - Residence Characteristics

KW - Rural Population

KW - Medline

KW - Unsupervised Play Addition

RP - NOT IN FILE

SP - 645

EP - 647

JF - Journal of Epidemiology & Community Health

JA - J Epidemiol.Community Health

VL - 64

IS - 7

CY - England

N2 - **BACKGROUND:** Injuries are an increasing child health concern and have become a leading cause of child mortality in the 1-4 years age group in many developing countries, including Bangladesh. **METHODS:** Household observations during 9 months of a community-based pilot of two supervision tools-a door barrier and

a playpen-designed to assess their community acceptability in rural Bangladesh are reported in this article.

**RESULTS:** Statistical analysis of 2694 observations revealed that children were directly supervised or protected by a preventive tool in 96% of visits. Households with a supervision tool had a significantly lower proportion of observations with the child unsupervised and unprotected than households without a tool. Families that received a playpen had 6.89 times the odds of using it at the time of the visit than families that received a door barrier.

**CONCLUSIONS:** Interventions such as the playpen, when introduced to households through community-based programs, are accepted by parents. Field trials are urgently needed to establish the effectiveness of barrier-based interventions at reducing under-five drowning mortality rates in low-income countries like Bangladesh

SN - 1470-2738

AD - International Injury Research Unit, Department of International Health, Bloomberg School of Public Health, Johns Hopkins University, 615 North Wolfe Street, Baltimore, MD 21205, USA

UR - 20547700

ER -

TY - JOUR

ID - 1558

T1 - Social participation and independent mobility in children: the effects of two implementations of "we go to school alone"

A1 - Prezza,M.

A1 - Alparone,F.R.

A1 - Renzi,D.

A1 - Pietrobono,A.

Y1 - 2010/01//

N1 - Prezza, Miretta. Alparone, Francesca Romana. Renzi, Daniela. Pietrobono, Annalisa

Journal of prevention & intervention in the community

9702085

IM

Journal Article. Research Support, Non-U.S. Gov't

English

KW - Child

KW - Consumer Participation

KW - Humans

KW - Longitudinal Studies

KW - Personal Autonomy

KW - Program Evaluation

KW - Questionnaires

KW - Rome

KW - Schools

KW - Transportation

KW - Medline

KW - Unsupervised Play Addition

RP - NOT IN FILE

SP - 8

EP - 25

JF - Journal of Prevention & Intervention in the Community

VL - 38

IS - 1

CY - England

N2 - The aim of this research was to determine the outcomes of the "We go to school alone" program in two Districts of Rome through a longitudinal study involving 392 children (mean age = 8.37 years) and 270 parents. The outcomes of the program in the two Districts were very different. Only one resulted in an increase in children's autonomous mobility on the home-school journey, a reduction in the number of times a child was taken to school by car, and, even more important, in an increase in the general level of children's independent mobility in their neighborhood. The findings are discussed in terms of a process evaluation that enabled us to understand the differing results

SN - 1540-7330

AD - Department of Psychology, Sapienza University of Rome, 00185 Rome, Italy. miretta.prezza@uniroma1.it  
UR - 20391051  
ER -

TY - JOUR

ID - 1559

T1 - Community psychology in Italy: introduction and prospects

A1 - Santinello, M.

A1 - Martini, E.R.

A1 - Perkins, D.D.

Y1 - 2010/01//

N1 - Santinello, Massimo. Martini, Elvio Raffaello. Perkins, Douglas D

Journal of prevention & intervention in the community

9702085

IM

Introductory Journal Article

English

KW - Adolescent

KW - Child

KW - Consumer Participation

KW - Evaluation Studies as Topic

KW - Health Promotion

KW - Health Services Research

KW - Humans

KW - Italy

KW - psychology

KW - Social

KW - Public Policy

KW - Medline

KW - Unsupervised Play Addition

RP - NOT IN FILE

SP - 1

EP - 7

JF - Journal of Prevention & Intervention in the Community

VL - 38

IS - 1

CY - England

N2 - The history of community psychology in Italy is briefly reviewed. The field has developed extensively in universities and applied settings over the past 30 years. This issue presents 5 recent examples from different regions of Italy of preventive and other community psychological intervention studies. They include an evaluation of a program to increase the independent mobility of children walking to and from school, the ecological evaluation of child and adolescent residential care communities, participatory action-research with adolescents in schools and neighborhoods, evaluation of a participatory local health intervention planning process, and the description and evaluation of a collaborative, Internet-based community planning training program

SN - 1540-7330

AD - Department of Developmental and Social Psychology, University of Padova, 35131 Padova, Italy.

massimo.santinello@unipd.it

UR - 20391050

ER -

TY - JOUR

ID - 1561

T1 - Knee-ankle-foot orthosis in children with duchenne muscular dystrophy: user views and adjustment

A1 - Garralda, M.E.

A1 - Muntoni, F.

A1 - Cunniff,A.

A1 - Caneja,A.D.

Y1 - 2006/07//

N1 - Garralda, M Elena. Muntoni, Francesco. Cunniff, Anna. Caneja, Angeles Diaz

European journal of paediatric neurology : EJPN : official journal of the European Paediatric Neurology Society  
9715169, dgs

IM

Journal Article. Research Support, Non-U.S. Gov't

English

KW - Adaptation

KW - Psychological

KW - Adolescent

KW - Ankle

KW - Caregivers/px [Psychology]

KW - Child

KW - Data Interpretation

KW - Statistical

KW - Female

KW - Foot

KW - Humans

KW - Interview

KW - Knee

KW - Male

KW - Mental Disorders/ep [Epidemiology]

KW - Mental Disorders/px [Psychology]

KW - Muscular Dystrophy

KW - Duchenne/px [Psychology]

KW - Duchenne/rh [Rehabilitation]

KW - Orthotic Devices

KW - Parents/px [Psychology]

KW - Patient Satisfaction

KW - Questionnaires

KW - Risk

KW - Medline

KW - Unsupervised Play Addition

RP - NOT IN FILE

SP - 186

EP - 191

JF - European Journal of Paediatric Neurology

JA - Europ.J Paediatr Neurol

VL - 10

IS - 4

CY - England

N2 - **BACKGROUND:** The use of knee ankle foot orthoses (KAFOs) to prolong independent mobility is a widely used rehabilitation strategy for children with Duchenne muscular dystrophy (DMD). **AIMS:** To explore views and adjustment of families with a child with Duchenne muscular dystrophy to the use of KAFOs.

**METHODS:** interviews with families of children aged 8-18 years with DMD; questionnaires on psychiatric adjustment (SDQ for children; GHQ for parents). **RESULTS:** In total, 17 parents and 9 children took part.

Families experienced the introduction of KAFOs as a signal for illness deterioration and a re-awakening of the feelings experienced at diagnosis. Nevertheless, the majority expressed a positive attitude and over two-thirds satisfaction with KAFOs use. High psychiatric risk was found in 2/17 children (12%; expected 10%) and 7/17 main carers (41%; expected 20-30%). **CONCLUSION:** Most families were satisfied with KAFOs use, and its implementation was well tolerated especially by the children. However, mental distress was high in main carers who emphasized the importance of full preparation and support in this rehabilitation technique

SN - 1090-3798



AD - Child and Adolescent Psychiatry, Imperial College London, St. Mary's Campus, Norfolk Place, London W2 1PG, UK. e.garralda@imperial.ac.uk  
UR - 16931076  
ER -

TY - JOUR  
ID - 1563  
T1 - Imaging of American football injuries in children  
A1 - Podberesky,D.J.  
A1 - Unsell,B.J.  
A1 - Anton,C.G.  
Y1 - 2009/12//  
N1 - Podberesky, Daniel J. Unsell, Bryan J. Anton, Christopher G

Pediatric radiology  
owi, 0365332

IM

Journal Article

English

KW - Adolescent

KW - Child

KW - Preschool

KW - Female

KW - Football/in [Injuries]

KW - Humans

KW - Magnetic Resonance Imaging/mt [Methods]

KW - Male

KW - Tomography

KW - X-Ray Computed/mt [Methods]

KW - Wounds

KW - Nonpenetrating/di [Diagnosis]

KW - Medline

KW - Unsupervised Play Addition

RP - NOT IN FILE

SP - 1264

EP - 1274

JF - Pediatric Radiology

JA - Pediatr Radiol

VL - 39

IS - 12

CY - Germany

N2 - It is estimated that 3.2 million children ages 6 to 14 years participated in organized youth football in the United States in 2007. Approximately 240,000 children play football in the nation's largest youth football organization, with tackle divisions starting at age 5 years. The number of children playing unsupervised football is much higher, and the overall number of children participating in American football is increasing. Sports are the leading cause of injury-related emergency room visits for teenagers, and football is a leading precipitating athletic activity for these visits. Football is also the most hazardous organized sports in the United States. Though most pediatric football-related injuries are minor, such as abrasions, sprains, and strains of the extremities, football accounts for more major and catastrophic injuries than any other sport. Given football's popularity with children in the United States, combined with the high rate of injury associated with participation in this activity, radiologists should be familiar with the imaging features and injury patterns seen in this patient population

SN - 1432-1998

AD - Department of Radiology, Cincinnati Children's Hospital Medical Center, Cincinnati, OH 45229, USA.  
daniel.podberesky@cchmc.org

UR - 19774374

ER -

TY - JOUR

ID - 1564

T1 - Exploring the neighborhood: a web-based survey on the prevalence and determinants of fear among young adolescent girls and boys

A1 - Johansson,K.

A1 - Hasselberg,M.

A1 - Laflamme,L.

Y1 - 2009/07//

N1 - Johansson, Klara. Hasselberg, Marie. Laflamme, Lucie

International journal of adolescent medicine and health

8506960

IM

Journal Article. Research Support, Non-U.S. Gov't

English

KW - Adaptation

KW - Psychological

KW - Adolescent

KW - Adolescent Behavior

KW - Child

KW - Confidence Intervals

KW - Epidemiologic Factors

KW - Fear

KW - Female

KW - Humans

KW - Internet

KW - Logistic Models

KW - Male

KW - Multivariate Analysis

KW - Odds Ratio

KW - Parent-Child Relations

KW - Prevalence

KW - Psychometrics

KW - Questionnaires

KW - Residence Characteristics

KW - Safety/sn [Statistics & Numerical Data]

KW - Sex Factors

KW - Socioeconomic Factors

KW - Stress

KW - Psychological/ep [Epidemiology]

KW - Psychological/et [Etiology]

KW - Sweden/ep [Epidemiology]

KW - Medline

KW - Unsupervised Play Addition

RP - NOT IN FILE

SP - 347

EP - 359

JF - International Journal of Adolescent Medicine & Health

JA - Int J Adolesc Med Health

VL - 21

IS - 3

CY - England

N2 - Children's independent everyday mobility can be hindered by fears experienced in their neighborhood. The aim of this study is to assess the prevalence and determinants of such fears among boys and girls in early adolescence, a period when individual freedom is expected to be on the increase. A sample of 7th grade students (age-13 years) in Stockholm County, Sweden, during 2005/06 answered a survey in class (n = 1,008). The

relation that gender, housing, family characteristics, individual and peer negative experiences in the neighborhood, parental licensing, and length of stay in the neighborhood have with fear disclosure was assessed through multivariate logistic regression. A total of 60% of the girls and 40% of the boys reported experiencing fears in their neighborhood. Gender differences were significant for all of the most common fears, in particular darkness. When respondents or their friends had been chased, hit, or had something taken from them in their neighborhood, they were more likely to report fear (OR girls 2.3; 95% CI 1.6-4.5; boys 2.8; 95% CI 1.9-4.2). For girls, having one or more parents born outside Sweden was associated with fear. Boys nearly three times more often reported fear if (a) they thought their parents were negative toward adolescent independent mobility in the evening, or (b) they had lived longer than one year in their area. Many young adolescents admitted to experiencing fear in their neighborhood. Fears were more common among girls, and the types and determinants of fear seem to be gender specific

SN - 0334-0139

AD - Karolinska Institutet, Department of Public Health Sciences, Division of Global Health, Stockholm, Sweden. klara.johansson@ki.se

UR - 20014638

ER -

TY - JOUR

ID - 1565

T1 - Development of a cart for independent mobility assistance for non-ambulatory children

A1 - Kakimoto,A.

A1 - Suzuki,S.

A1 - Sekiguchi,Y.

Y1 - 2009///

N1 - Kakimoto, Akira. Suzuki, Shigenobu. Sekiguchi, Yukio

Conference proceedings : ... Annual International Conference of the IEEE Engineering in Medicine and Biology Society. IEEE Engineering in Medicine and Biology Society. Conference

101243413

IM

Journal Article

English

KW - Biomechanical Phenomena

KW - Biomedical Engineering

KW - Cerebral Palsy/pp [Physiopathology]

KW - Cerebral Palsy/rh [Rehabilitation]

KW - Child

KW - Preschool

KW - Equipment Design

KW - Female

KW - Humans

KW - Male

KW - Man-Machine Systems

KW - Motor Skills

KW - Self-Help Devices/sn [Statistics & Numerical Data]

KW - Self-Help Devices

KW - Software

KW - Wheelchairs

KW - Medline

KW - Unsupervised Play Addition

RP - NOT IN FILE

SP - 7273

EP - 7276

JF - Conference Proceedings:

JA - Conf.Proc IEEE Eng Med Biol Soc

VL - .. Annual International Conference of the IEEE Engineering in Medicine & Biology Society. 2009

CY - United States

N2 - Some parents of non-ambulatory children are not eager to allow their children to use powered wheelchairs because of apprehension of further deterioration of their functionality and the risk for accidents. The authors think that not all but some such children could develop their ability to operate powered wheelchairs and might expand their knowledge about the circumstances and interests in them. Thus we made a prototype cart for them eventually to experience motion by themselves. Based on a 6-wheeled chassis, the two middle wheels are driven with a traction roller drive system. We had been testing this prototype with a child with cerebral palsy for one year. Acquisition of skills in pushing switches and enjoyment of motion were confirmed. However, we encountered several problems such as difficulty in rolling on a carpet and in handling due to its weight. The ability to record moving speed and operation of input devices helps rehabilitation experts to conduct quantitative performance evaluation. To solve these problems, we manufactured another prototype. The second prototype was tested with another child with cerebral palsy for one year. The problems were solved. She acquired the operation skills necessary to operate the prototype with four switch operation

SN - 1557-170X

AD - Polytechnic University, 4-1-1 Hashimotodai Sagamihara, Kanagawa 229-1196, Japan.

kakimoto@uitech.ac.jp

UR - 19965102

ER -

TY - JOUR

ID - 1566

T1 - Encouraging walking for transport and physical activity in children and adolescents: how important is the built environment?. [Review] [1113 refs]

A1 - Giles-Corti,B.

A1 - Kelty,S.F.

A1 - Zubrick,S.R.

A1 - Villanueva,K.P.

Y1 - 2009///

N1 - Giles-Corti, Billie. Kelty, Sally F. Zubrick, Stephen R. Villanueva, Karen P

Sports medicine (Auckland, N.Z.)

8412297, spo

IM

Journal Article. Research Support, Non-U.S. Gov't. Review

English

KW - Adolescent

KW - Child

KW - Environment Design

KW - Exercise

KW - Female

KW - Health Promotion

KW - Humans

KW - Male

KW - Motivation

KW - Walking

KW - Medline

KW - Unsupervised Play Addition

RP - NOT IN FILE

SP - 995

EP - 1009

JF - Sports Medicine

JA - Sports Med

VL - 39

IS - 12

CY - New Zealand

N2 - In the post-World War II era, there have been dramatic changes to the environment that appear to be having a detrimental impact on the lifestyles and incidental physical activities of young people. These changes are not trivial and have the potential to influence not only physical health, but also mental health and child

development. However, the evidence of the impact of the built environment on physical activity to date is inconsistent. This review examines the evidence on the association between the built environment and walking for transport as well as physical activity generally, with a focus on methodological issues that may explain inconsistencies in the literature to date. It appears that many studies fail to measure behaviour-specific environmental correlates, and insufficient attention is being given to differences according to the age of study participants. Higher levels of out-of-school-hours physical activity and walking appear to be significantly associated with higher levels of urban density and neighbourhoods with mixed-use planning, especially for older children and adolescents. Proximate recreational facilities also appear to predict young people's level of physical activity. However, there are inconsistencies in the literature involving studies with younger children. Independent mobility increases with age. For younger children, the impact of the built environment is influenced by the decision-making of parents as the gatekeepers of their behaviour. Cross-cultural differences may also be present and are worthy of greater exploration. As children develop and are given more independent mobility, it appears that the way neighbourhoods are designed - particularly in terms of proximity and connectivity to local destinations, including schools and shopping centres, and the presence of footpaths - becomes a determinant of whether children are able, and are permitted by their parents, to walk and use destinations locally. If older children and adolescents are to enjoy health and developmental benefits of independent mobility, a key priority must be in reducing exposure to traffic and in increasing surveillance on streets (i.e. 'eyes-on-the-street') through neighbourhood and building design, by encouraging others to walk locally, and by discouraging motor vehicle use in favour of walking and cycling. Parents need to be assured that the rights and safety of pedestrians (and cyclists) - particularly child pedestrians and cyclists - are paramount if we are to turn around our 'child-free streets', now so prevalent in contemporary Australian and US cities. There remains a need for more age- and sex-specific research using behaviour- and context-specific measures, with a view to building a more consistent evidence base to inform future environmental interventions. [References: 1113]

SN - 1179-2035

AD - Centre for the Built Environment and Health, School of Population Health, University of Western Australia, Crawley, Western Australia, Australia. Billie.Giles-Corti@uwa.edu.au

UR - 19902982

ER -

TY - JOUR

ID - 1567

T1 - Sport and recreation-related injuries and fracture occurrence among emergency department attendees: implications for exercise prescription and injury prevention

A1 - Falvey,E.C.

A1 - Eustace,J.

A1 - Whelan,B.

A1 - Molloy,M.S.

A1 - Cusack,S.P.

A1 - Shanahan,F.

A1 - Molloy,M.G.

Y1 - 2009/08//

N1 - Falvey, E C. Eustace, J. Whelan, B. Molloy, M S. Cusack, S P. Shanahan, F. Molloy, M G

Emergency medicine journal : EMJ

b0u, 100963089

IM

Journal Article. Research Support, Non-U.S. Gov't

English

KW - Adolescent

KW - Adult

KW - Athletic Injuries/ep [Epidemiology]

KW - Athletic Injuries/pc [Prevention & Control]

KW - Child

KW - Preschool

KW - Emergency Service

KW - Hospital/sn [Statistics & Numerical Data]

KW - Exercise Therapy  
 KW - Female  
 KW - Fractures  
 KW - Bone/ep [Epidemiology]  
 KW - Bone/pc [Prevention & Control]  
 KW - Humans  
 KW - Ireland  
 KW - Male  
 KW - Prospective Studies  
 KW - Recreation  
 KW - Medline  
 KW - Unsupervised Play Addition  
 RP - NOT IN FILE  
 SP - 590  
 EP - 595  
 JF - Emergency Medicine Journal  
 JA - Emerg Med J  
 VL - 26  
 IS - 8  
 CY - England

N2 - OBJECTIVE: To investigate the epidemiology of sports and recreation-related injury (SRI) among emergency department (ED) attendees. DESIGN: Descriptive epidemiology study. SETTING: An Irish university hospital ED. PARTICIPANTS: All patients aged over 4 years attending a large regional ED, during a 6-month period, for the treatment of SRI were prospectively surveyed. ASSESSMENT OF RISK FACTORS: In all cases identified as SRI the attending physician completed a specifically designed questionnaire. It was postulated that recreation-related injury is a significant proportion of reported SRI. RESULTS: Fracture rate was highest in the 4-9-year age group (44%). On multivariate logistic regression the adjusted odds ratio (OR; 95% CI) of fracture was higher for children (vs adults) at 1.21 (1.0 to 1.45). The adjusted OR was higher for upper-limb 5.8 (4.5 to 7.6) and lower-limb injuries 1.87 (1.4 to 2.5) versus axial site of injury and for falls 2.2 (1.6 to 2.9) and external force 1.59 (1.2 to 2.1) versus an overextension mechanism of injury. In the same model, "play" was independently associated with fracture risk, adjusted OR 1.98 (1.2 to 3.0;  $p = 0.001$ ) versus low-risk ball sports 1.0 (reference); an effect size similar to that seen for combat sports 1.96 (1.2 to 3.3;  $p = 0.01$ ) and greater than that seen for presumed high-risk field sports 1.4 (0.9 to 2.0) CONCLUSION: Fall and subsequent upper-limb injury was the commonest mechanism underlying SRI fracture. Domestic "play" in all age groups at the time of injury accorded a higher fracture risk than field sports. Patient education regarding the dangers of unsupervised play and recreation represents a means of reducing the burden of SRI

SN - 1472-0213

AD - Department of Rheumatology, Sports and Exercise Medicine, Cork University Hospital, Wilton, Cork, Ireland. e.falvey@ireland.com

UR - 19625558

ER -

TY - JOUR

ID - 1568

T1 - Significant pediatric morbidity and mortality from intracranial ballistic injuries caused by nonpowder gunshot wounds. A case series

A1 - O'Neill,P.J.

A1 - Lumpkin,M.F.

A1 - Clapp,B.

A1 - Kopelman,T.R.

A1 - Matthews,M.R.

A1 - Cox,J.C.

A1 - Caruso,D.M.

A1 - Feiz-Erfan,I.

Y1 - 2009///

N1 - O'Neill, Patrick J. Lumpkin, Mary Foster. Clapp, Benjamin. Kopelman, Tammy R. Matthews, Marc R. Cox, Jordy C. Caruso, Daniel M. Feiz-Erfan, Iman

Pediatric neurosurgery

axe, 9114967

IM

Case Reports. Journal Article

English

KW - Adolescent

KW - Adult

KW - Age Distribution

KW - Child

KW - Preschool

KW - Fatal Outcome

KW - Female

KW - Firearms/sn [Statistics & Numerical Data]

KW - Humans

KW - Infant

KW - Male

KW - Morbidity

KW - Play and Playthings/in [Injuries]

KW - Registries

KW - Retrospective Studies

KW - Southwestern United States/ep [Epidemiology]

KW - Tomography

KW - X-Ray Computed

KW - Wounds

KW - Gunshot/mo [Mortality]

KW - Gunshot/ra [Radiography]

KW - Medline

KW - Unsupervised Play Addition

RP - NOT IN FILE

SP - 205

EP - 209

JF - Pediatric Neurosurgery

JA - Pediatr Neurosurg

VL - 45

IS - 3

CY - Switzerland

N2 - Nonpowder (ball-bearing and pellet) weapons derive their source of energy from compressed air or carbon dioxide. Such weapons are dangerous toys that cause serious injuries and even death to children and adolescents. A retrospective chart review study was undertaken to describe nonpowder gun injuries at a southwestern US urban level I adult and pediatric trauma center. Specific emphasis was placed on intracranial injuries. Over the past 6 years, a total of 29 pediatric and 7 adult patients were identified as having nonpowder firearm injuries. The patient population was overwhelmingly male (89.7%; mean age, 11 years). Overall, 17 out of 29 pediatric patients (56.8%) sustained serious injury. Nine patients (30.0%) required operation, 6 (20.7%) sustained significant morbidity, and there were 2 deaths (6.9%). Injuries to the brain, eye, head, and neck were the most common sites of injury (65.6%). Specific intracranial injuries in 3 pediatric patients are described that resulted in the death of 2 children. We suggest that age warning should be adjusted to 18 years or older for unsupervised use to be considered safe of these potentially lethal weapons. Copyright 2009 S. Karger AG, Basel

SN - 1423-0305

AD - Division of Burns, Trauma, and Surgical Critical Care, Department of Surgery, Maricopa Medical Center, Phoenix, Ariz., USA

UR - 19494565

ER -

TY - JOUR

ID - 1569

T1 - Parents' perceptions of postschool years for young adults with developmental disabilities

A1 - Bianco, M.

A1 - Garrison-Wade, D.F.

A1 - Tobin, R.

A1 - Lehmann, J.P.

Y1 - 2009/06//

N1 - Bianco, Margarita. Garrison-Wade, Dorothy F. Tobin, Romie. Lehmann, Jean P  
Intellectual and developmental disabilities

101299965

IM

Journal Article

English

KW - Activities of Daily Living/px [Psychology]

KW - Adolescent

KW - Adult

KW - Community Health Services

KW - Education of Intellectually Disabled

KW - Female

KW - Health Services Needs and Demand

KW - Humans

KW - Male

KW - Mentally Disabled Persons/px [Psychology]

KW - Mentally Disabled Persons/rh [Rehabilitation]

KW - Parenting/px [Psychology]

KW - Patient Advocacy

KW - Personal Autonomy

KW - Rehabilitation

KW - Vocational

KW - Social Adjustment

KW - Social Environment

KW - Young Adult

KW - Medline

KW - Unsupervised Play Addition

RP - NOT IN FILE

SP - 186

EP - 196

JF - Intellectual & Developmental Disabilities

JA - Intellect Dev Disabil

VL - 47

IS - 3

CY - United States

N2 - This qualitative study investigated parents' perceptions of the various roles they played in their adult children's lives during the post-high school years. Individual face-to-face interviews were conducted with 9 families of young adults with developmental disabilities. Findings indicated that families perceived the complexity of their roles as balancing between advocating for their adult children's needs while promoting independence and self-determination. The roles parents assumed as their children entered into adult life were those of collaborators, decision makers, and program evaluators, role models, trainers, mentors and instructors, and systems change agents. Parents often felt they were the safety net for their children and the back-up plan for service agencies. Parents' quotes illustrated the complexity of the roles they played as their young adult children with developmental disabilities entered adulthood

SN - 1934-9491

AD - University of Colorado Denver, School of Education and Human Development, Denver, CO, USA.

Margarita.Bianco@ucdenver.edu

UR - 19489664

ER -



TY - JOUR

ID - 1570

T1 - Coach autonomy support and quality of sport engagement in young soccer players

A1 - Alvarez,M.S.

A1 - Balaguer,I.

A1 - Castillo,I.

A1 - Duda,J.L.

Y1 - 2009/05//

N1 - Alvarez, Maria Sol. Balaguer, Isabel. Castillo, Isabel. Duda, Joan L

The Spanish journal of psychology

101095192

IM

Journal Article. Research Support, Non-U.S. Gov't

English

KW - Adolescent

KW - Athletic Performance

KW - Boredom

KW - Child

KW - Competitive Behavior

KW - Humans

KW - Internal-External Control

KW - Interpersonal Relations

KW - Male

KW - Models

KW - Psychological

KW - Motivation

KW - Personal Autonomy

KW - Personal Satisfaction

KW - Psychological Theory

KW - Questionnaires

KW - Self Concept

KW - Soccer/px [Psychology]

KW - Social Environment

KW - Social Perception

KW - Social Support

KW - Teaching

KW - Medline

KW - Unsupervised Play Addition

RP - NOT IN FILE

SP - 138

EP - 148

JF - Spanish Journal of Psychology

JA - Span J Psychol

VL - 12

IS - 1

CY - Spain

N2 - Based on the self-determination theory (Ryan & Deci, 2000), this study tested a model of the assumed sequential relationships between perceived autonomy support, psychological need satisfaction, self-determined motivation, and enjoyment/boredom. The hypothesized mediational roles of psychological need satisfaction and self-determined motivation were also studied. In a sample of 370 young male soccer players, path analysis results offered support for the proposed model. Total mediation was supported in the case of the psychological need satisfaction in the relationship between autonomy support and self-determined motivation, and partial mediation for self-determined motivation in the links between psychological need satisfaction and enjoyment (positive) and boredom (negative). Implications of autonomy-supportive behaviors provided by coaches for the quality of sport involvement among young athletes are discussed

SN - 1138-7416

AD - Universitat de Valencia, Spain

UR - 19476227

ER -

TY - JOUR

ID - 1572

T1 - Role of hip arthrodesis in current practice: long term results following conversion to total hip arthroplasty

A1 - Sirikonda,S.P.

A1 - Beardmore,S.P.

A1 - Hodgkinson,J.P.

Y1 - 2008/10//

N1 - Sirikonda, S P. Beardmore, S P. Hodgkinson, J P

Hip international : the journal of clinical and experimental research on hip pathology and therapy  
9200413

IM

Journal Article

English

KW - Adolescent

KW - Adult

KW - Aged

KW - 80 and over

KW - Arthrodesis/ae [Adverse Effects]

KW - Arthroplasty

KW - Replacement

KW - Hip

KW - Back Pain/et [Etiology]

KW - Back Pain/pp [Physiopathology]

KW - Child

KW - Preschool

KW - Female

KW - Follow-Up Studies

KW - Health Status Indicators

KW - Hip Joint/pp [Physiopathology]

KW - Hip Joint/ra [Radiography]

KW - Hip Joint/su [Surgery]

KW - Humans

KW - Male

KW - Middle Aged

KW - Orthopedics/mt [Methods]

KW - Postoperative Complications/et [Etiology]

KW - Postoperative Complications/su [Surgery]

KW - Range of Motion

KW - Articular

KW - Reoperation

KW - Retrospective Studies

KW - Treatment Outcome

KW - Young Adult

KW - Medline

KW - Unsupervised Play Addition

RP - NOT IN FILE

SP - 263

EP - 271

JF - Hip International

JA - Hip int

VL - 18

IS - 4

CY - Italy

N2 - **BACKGROUND:** Hip arthrodesis was once considered as a preferred treatment option in young people with hip arthritis. The purpose of this retrospective study was to evaluate the long term outcome following conversion of hip arthrodesis to arthroplasty. The main indications for conversion were back pain and ipsilateral muscular or knee pain. **METHODS:** Sixty-eight procedures in 67 patients performed between 1963 and 2000 at Wrightington Hospital were evaluated. **RESULTS:** The mean age at the time of hip arthrodesis was 16.7 years (3 to 39 years). The mean age at the time of conversion was 48.7 years (24 to 74 years). The Merle d'Aubigne score improved from a mean of 8.81 pre-operatively to 13.6 at the latest follow-up. Complications included DVT (3 patients), transient foot drop (1 patient), and hepatitis following blood transfusion (1 patient). Seven patients required further revision surgery following conversion. **CONCLUSIONS:** Arthrodesis remains a sensible and safe treatment option maintaining independent mobility without multiple operations or significant bone loss for 20-30 years which subsequently can be successfully converted to an arthroplasty

SN - 1724-6067

AD - Department of Orthopaedics, Royal Liverpool and Broadgreen University Hospitals, Liverpool, UK.

sirikonda.siva@rlbuht.nhs.uk

UR - 19097003

ER -

TY - JOUR

ID - 1574

T1 - Screen-viewing and the home TV environment: the European Youth Heart Study

A1 - Jago,R.

A1 - Page,A.

A1 - Froberg,K.

A1 - Sardinha,L.B.

A1 - Klasson-Heggebo,L.

A1 - Andersen,L.B.

Y1 - 2008/11//

N1 - Jago, Russell. Page, Angie. Froberg, Karsten. Sardinha, Luis B. Klasson-Heggebo, Lena. Andersen, Lars  
B

Preventive medicine

pm4, 0322116

IM

Journal Article. Research Support, Non-U.S. Gov't

English

KW - Adolescent

KW - Child

KW - Child Behavior

KW - Europe

KW - Female

KW - Health Status

KW - Housing

KW - Humans

KW - Life Style

KW - Male

KW - Obesity

KW - Parent-Child Relations

KW - Personal Autonomy

KW - Television/ut [Utilization]

KW - Medline

KW - Unsupervised Play Addition

RP - NOT IN FILE

SP - 525

EP - 529

JA - Preventive Medicine

VL - 47

IS - 5

CY - United States

N2 - OBJECTIVE: Examine if home environmental factors are associated with screen-viewing. METHODS: Data are for 2670, 3rd and 9th grade participants in Denmark, Portugal, Estonia and Norway collected between 1997 and 2000. Outcomes were spending >2 h after-school watching television (TV) and >1 h per day playing computer games. Child Autonomy and the home TV Environment were exposures. RESULTS: Each unit increase in Child Autonomy was associated with 9% increase in risk of watching more than 2 h of TV per day after school and a 19% increase in risk of spending more than an hour per day playing computer games. TV Environment was associated with a 31% per unit increase in risk of watching >2 h of TV after school and 11% increase in risk of spending >1 h playing computer games. CONCLUSIONS: A family environment in which after-school TV viewing is part of the home culture and homes where children have more autonomy over their own behavior are associated with an increased risk of watching >2 h of TV per day after school and spending more >1 h per day playing computer games. The home screen-viewing environment and Child Autonomy may be malleable targets for changing screen-viewing

SN - 1096-0260

AD - Department of Exercise, Nutrition and Health Sciences, University of Bristol, Tyndall Avenue, Bristol BS81TP, UK. russ.jago@bris.ac.uk

UR - 18722400

ER -

TY - JOUR

ID - 1575

T1 - Shopping cart injuries, entrapment, and childhood fatality

A1 - Jensen,L.

A1 - Charlwood,C.

A1 - Byard,R.W.

Y1 - 2008/09//

N1 - Jensen, Lisbeth. Charlwood, Cheryl. Byard, Roger W

Journal of forensic sciences

i5z, 0375370

IM

Case Reports. Journal Article

English

KW - Accidents

KW - Asphyxia/et [Etiology]

KW - Asphyxia/pa [Pathology]

KW - Consumer Product Safety

KW - Female

KW - Forensic Pathology

KW - Humans

KW - Infant

KW - Neck Injuries/et [Etiology]

KW - Neck Injuries/pa [Pathology]

KW - Medline

KW - Unsupervised Play Addition

RP - NOT IN FILE

SP - 1178

EP - 1180

JF - Journal of Forensic Sciences

JA - J Forensic Sci

VL - 53

IS - 5

CY - United States

N2 - Shopping carts may be associated with a variety of injuries, particularly in toddlers and young children. These usually relate to falls from carts or to tip-overs. Injuries that are sustained include hematomas/contusions,

abrasions, lacerations, fractures, and fingertip amputations. Fatal episodes are uncommon and are usually due to blunt craniocerebral trauma from falls. A case involving a 19-month-old girl is reported who became entrapped when she inserted her head through the side frame of a cart that had been removed from a supermarket and left at her home address. Death was caused by neck compression. Although rare, the potential for lethal entrapment during unsupervised play means that the presence of stray shopping carts at private residences and in public places, including playgrounds and parks, is of concern. Strategies, such as coin deposits, should be encouraged to assist in the return of such carts to supermarkets

SN - 1556-4029

AD - Discipline of Pathology, University of Adelaide, Frome Road, Adelaide 5005, Australia

UR - 18624893

ER -

TY - JOUR

ID - 1577

T1 - Inflatable bouncer-related fractures in children

A1 - Avoian,T.

A1 - Choi,P.D.

A1 - Manjra,N.

A1 - Weiss,J.

Y1 - 2008/09//

N1 - Avoian, Tigran. Choi, Paul D. Manjra, Nahid. Weiss, Jennifer

Journal of pediatric orthopedics

hsw, 8109053

IM

Journal Article

English

KW - Accidents

KW - Adolescent

KW - Adult

KW - Age Factors

KW - Child

KW - Preschool

KW - Databases

KW - Factual

KW - Female

KW - Fractures

KW - Bone/ep [Epidemiology]

KW - Bone/et [Etiology]

KW - Bone/pc [Prevention & Control]

KW - Humans

KW - Infant

KW - Male

KW - Parenting

KW - Play and Playthings

KW - Retrospective Studies

KW - Risk Factors

KW - Sex Factors

KW - Trauma Centers/sn [Statistics & Numerical Data]

KW - Upper Extremity/in [Injuries]

KW - Medline

KW - Unsupervised Play Addition

RP - NOT IN FILE

SP - 656

EP - 659

JF - Journal of Pediatric Orthopedics

JA - J Pediatr Orthop

VL - 28

IS - 6

CY - United States

**N2 - BACKGROUND:** Inflatable bouncers or moonbouncers are very popular in private and public settings and are usually perceived as very safe attractions, but are associated with frequent fractures in children. To date, there are no publications in the medical literature about these types of injuries. The purpose of this study was to show skeletal injuries related to inflatable bouncer use, describe their characteristics, and determine possible risk factors and preventive measures. **METHODS:** Demographic data and injury characteristics were analyzed for all patients who were treated for inflatable bouncer-associated injuries in the pediatric fracture clinic of a level I trauma center from October 2002 to March 2007. **RESULTS:** Forty-nine patients were treated for inflatable bouncer-related fractures. Children ranged in age from 1.5 to 15 years old (mean age, 7.8 years) with a male-female ratio of approximately 3:1. The most commonly injured region was the upper extremity (65.5%, n = 32). The most commonly injured area was the elbow (31%, n = 15), and the most common single diagnosis was supracondylar humerus fracture (22%, n = 11). Diaphyseal long bone fractures were found in 18% (n = 9) of the patients and nondiaphyseal in 71% (n = 35). One patient (2%) had an open fracture. Mechanisms of injury included collision of 1 person with another (67%), falling out of a bouncer onto a hard object outside the device (19%), and twisting motion to the leg (14%). There was no adult supervision in many of the incidents (43%), and the presence of different-aged children inside the jumper took place in 52% cases. **CONCLUSIONS:** Inflatable bouncers can cause serious orthopaedic injuries. Children playing in the bouncer should be placed in small groups according to their size and should be closely supervised at all times. **STUDY DESIGN:** Case series. Level IV evidence

SN - 1539-2570

AD - University of Southern California, Los Angeles, CA, USA. avoian@usc.edu

UR - 18724203

ER -

TY - JOUR

ID - 1578

T1 - The cost of Child Health Days: a case study of Ethiopia's Enhanced Outreach Strategy (EOS)

A1 - Fiedler, J.L.

A1 - Chuko, T.

Y1 - 2008/07//

N1 - Fiedler, John L. Chuko, Tesfaye

Health policy and planning

8610614, f9q

H

Evaluation Studies. Journal Article. Research Support, Non-U.S. Gov't

English

KW - Anthelmintics/sd [Supply &amp; Distribution]

KW - Bedding and Linens/sd [Supply &amp; Distribution]

KW - Child

KW - Child Health Services/ec [Economics]

KW - Cost Allocation

KW - Ethiopia

KW - Health Care Costs/sn [Statistics &amp; Numerical Data]

KW - Health Priorities

KW - Health Status Indicators

KW - Humans

KW - Immunization Programs/ec [Economics]

KW - Measles/ec [Economics]

KW - Measles/pc [Prevention &amp; Control]

KW - Organizational Case Studies

KW - Preventive Health Services/ec [Economics]

KW - Program Evaluation

KW - Quality-Adjusted Life Years

KW - Regional Health Planning/ec [Economics]

KW - Value of Life/ec [Economics]

KW - Vitamin A/sd [Supply & Distribution]

KW - Medline

KW - Unsupervised Play Addition

RP - NOT IN FILE

SP - 222

EP - 233

JF - Health Policy & Planning

JA - Health Policy Plan.

VL - 23

IS - 4

CY - England

N2 - Child Health Days (CHDs) are twice-annual campaign-style events designed to increase the coverage of vitamin A and one or more other child health services. Although more than two dozen countries have had a CHD, little has been published about them. This paper presents an activity-based costing study of Ethiopia's version of CHDs, the Enhanced Outreach Strategy (EOS). The December 2006 round reached more than 10 million beneficiaries at an average cost per beneficiary of US\$0.56. When measles is added, the cost of the package doubles. Given the way the distribution day delivery system and the service package are structured, there are economies of scope. Because most of the costs are determined by the number of delivery sites and are independent of the number of beneficiaries, other things equal, increasing the beneficiaries would reduce the average cost per beneficiary. Taking into account only the mortality impact of vitamin A, EOS saved 20,200 lives and averted 230,000 DALYs of children 6-59 months. The average cost per life saved was US\$228 and the cost per DALY averted was equivalent to 6% of per capita GDP (US\$9), making the EOS cost-effective, according to WHO criteria. While CHDs are generally construed as a temporary strategy for improving coverage of supply-constrained systems, inadequate attention has been paid to demand-side considerations that suggest CHDs have an important role to play in changing care-seeking behaviour, in increasing community organization and participation, and in promoting district autonomy and capacity. Recognition of these effects suggests the need for decisions about where and when to introduce, and when to end, a CHD to take into account more than 'just' health sector considerations: they are more broadly about community development. UNICEF played a key role in initiating the EOS and finances 68% of costs, raising concern about the programme's long-term sustainability

SN - 0268-1080

AD - Social Sectors Development Strategies, Boston, MA, USA. jfiedler@ssds.net

UR - 18562457

ER -

TY - JOUR

ID - 1579

T1 - Differential effects of an adult observer's presence on sex-typed play behavior: A comparison between gender-schematic and gender-aschematic preschool children

A1 - Wilansky-Traynor,P.

A1 - Lobel,T.E.

Y1 - 2008/08//

N1 - Wilansky-Traynor, Pamela. Lobel, Thalma E

Archives of sexual behavior

8gr, 1273516

IM

Journal Article

English

KW - Adult

KW - Child

KW - Preschool

KW - Choice Behavior

KW - Female

KW - Gender Identity

KW - Humans

KW - Individuality  
 KW - Male  
 KW - Motivation  
 KW - Observation  
 KW - Personality Assessment  
 KW - Play and Playthings  
 KW - Social Conformity  
 KW - Social Environment  
 KW - SOCIALIZATION  
 KW - Stereotyping  
 KW - Medline  
 KW - Unsupervised Play Addition  
 RP - NOT IN FILE  
 SP - 548  
 EP - 557  
 JF - Archives of Sexual Behavior  
 JA - Arch.Sex Behav  
 VL - 37  
 IS - 4  
 CY - United States  
 N2 - The present study examined the differential effect of an adult observer's presence on the sex-typed play behavior of gender schematic and aschematic preschoolers. A total of 116 Israeli preschoolers (M age = 64.9 months) participated in the study. Children were classified as either gender schematic or aschematic based upon responses to a computerized measure of different sex stereotype components. Children's play behavior with gender typical and atypical, attractive and unattractive, toys was videotaped. An observer was present for half the children's play and absent for the other half's play. Observation status affected the aschematic, but not the schematic, children's play with gender typical toys. For example, observed aschematic boys spent a greater percent of time playing with the unattractive masculine toys compared to unobserved aschematic boys. This difference was not apparent for schematic boys. Additionally, a difference found for schematic boys was not apparent in schematic girls, i.e., when unobserved, schematic boys tended to spend a greater percent of time playing with the unattractive masculine toy than aschematic boys. Further, some differences were found for unattractive, and not attractive, toys. For instance, observed aschematic boys spent a greater percent of time playing with the unattractive masculine toy than did the unobserved aschematic boys. This gap was not found for the attractive masculine toy. Results are discussed with reference to the accessibility and complexity of gender schemas  
 SN - 0004-0002  
 AD - Child, Youth, and Family Program, Centre for Addiction and Mental Health, 250 College St., Toronto, ON, Canada, M5T 1R8. Pamela\_Wilansky@camh.net  
 UR - 18299975  
 ER -  
  
 TY - JOUR  
 ID - 1581  
 T1 - Infants in group care: their interactions with professional caregivers and parents across the second year of life  
 A1 - Gevers Deynoot-Schaub,M.J.  
 A1 - Riksen-Walraven,J.M.  
 Y1 - 2008/04//  
 N1 - Gevers Deynoot-Schaub, Mirjam J J M. Riksen-Walraven, J Marianne  
 Infant behavior & development  
 7806016  
 IM  
 Comparative Study. Journal Article  
 English  
 KW - Age Factors  
 KW - Caregivers/px [Psychology]



KW - Child Day Care Centers/mt [Methods]

KW - Female

KW - Humans

KW - Infant

KW - Infant Behavior/px [Psychology]

KW - Infant Care/mt [Methods]

KW - Infant Care

KW - Male

KW - Parent-Child Relations

KW - Parents/px [Psychology]

KW - Play and Playthings/px [Psychology]

KW - Medline

KW - Unsupervised Play Addition

RP - NOT IN FILE

SP - 181

EP - 189

JF - Infant Behavior & Development

JA - Infant behav

VL - 31

IS - 2

CY - United States

N2 - Seventy children were observed during structured play with their primary professional caregivers and three peers in the child care center and with their primary caregiving parents at home at 15 and 23 months of age. The same structured play tasks were used in the two settings and the quality of the children's interactions with caregivers and parents was rated using the same 7-point scales. As expected, the quality of caregiver-child interactions significantly increased between 15 and 23 months. At 15 months, the quality of caregiver-child interactions was significantly lower than the quality of parent-child interactions, particularly with regard to caregiver supportive presence and respect for the child's autonomy. At 23 months, however, the quality of caregiver-child interactions was no longer lower and in some respects even higher than the quality of parent-child interactions. At both ages, the children expressed more negativity towards their parents than towards their professional caregivers

SN - 1934-8800

AD - Department of Educational Sciences, University of Amsterdam, The Netherlands

UR - 18048100

ER -

TY - JOUR

ID - 1584

T1 - Effects of caregiver-child interactions on play occupations among young children institutionalized in Eastern Europe

A1 - Daunhauer,L.A.

A1 - Coster,W.J.

A1 - Tickle-Degnen,L.

A1 - Cermak,S.A.

Y1 - 2007/07//

N1 - Daunhauer, Lisa A. Coster, Wendy J. Tickle-Degnen, Linda. Cermak, Sharon A

The American journal of occupational therapy : official publication of the American Occupational Therapy Association

7705978, 3o4

IM

Journal Article. Research Support, Non-U.S. Gov't. Research Support, U.S. Gov't, P.H.S.

English

KW - Caregivers

KW - Child Behavior/px [Psychology]

KW - Child

KW - Preschool

KW - Emotions

KW - Female

KW - Humans

KW - Infant

KW - Interpersonal Relations

KW - Male

KW - Orphanages

KW - Pediatrics

KW - Play and Playthings

KW - Romania

KW - Medline

KW - Unsupervised Play Addition

RP - NOT IN FILE

SP - 429

EP - 440

JA - American Journal of Occupational Therapy

VL - 61

IS - 4

CY - United States

N2 - OBJECTIVE: We investigated whether children institutionalized in an orphanage would engage in more developmentally competent play with their caregivers as opposed to playing alone and whether specific qualities of caregiver-child interactions were associated with more developmentally competent play. METHOD: Twenty-six children, ages 10 to 38 months, participated in independent play sessions and in a play session with a caregiver. Interrater reliability for coding play performance was established using the weighted kappa statistic ( $M = .82$ ). Twelve pediatric experts rated both child and caregiver behaviors for the interactive sessions (mean effective reliability with intraclass correlations = .89). RESULTS: The children demonstrated more developmentally competent play when interacting with a caregiver than when playing alone,  $t(25) = -1.88$ ,  $p < .04$ , one-tailed. The effect size was moderate ( $d = .53$ ). Longer periods of institutionalization were associated with less improvement in play performance from independent to interactive play sessions ( $r = -.51$ ,  $p < .01$ ). Successful engagement for the child was associated with having a caregiver who provided more structure and assistance and who was directive and encouraging ( $r = .82, .75, .75$ , and  $.64$ , respectively). CONCLUSION: Caregivers facilitated more developmentally competent participation in play with children residing in an orphanage, despite the fact that these interactions occurred in an environment vulnerable to many challenges not typical of an exclusive caregiver-child relationship. Findings are discussed in the context of environmental challenges and occupational therapy practice

SN - 0272-9490

AD - Department of Occupational Therapy, College of Applied Human Sciences, Colorado State University, Fort Collins, CO 80523-1573, USA. ldaun@cahs.colostate.edu

UR - 17685176

ER -

TY - JOUR

ID - 1585

T1 - Associations between youth assets and sexual activity: does adult supervision play a role?

A1 - Harris,L.

A1 - Oman,R.F.

A1 - Vesely,S.K.

A1 - Tolma,E.L.

A1 - Aspy,C.B.

A1 - Rodine,S.

A1 - Marshall,L.

A1 - Fluhr,J.

Y1 - 2007/07//

N1 - Harris, L. Oman, R F. Vesely, S K. Tolma, E L. Aspy, C B. Rodine, S. Marshall, L. Fluhr, J

Child: care, health and development

7602632, c9x

IM

Comparative Study. Journal Article. Research Support, U.S. Gov't, P.H.S.

English

KW - Adolescent

KW - Adolescent Behavior

KW - Adolescent Psychology

KW - Adult

KW - Female

KW - Humans

KW - Male

KW - Parent-Child Relations

KW - Parents

KW - Risk-Taking

KW - Sex Education/mt [Methods]

KW - Sexual Behavior

KW - Sexually Transmitted Diseases/pc [Prevention &amp; Control]

KW - Social Environment

KW - United States

KW - Urban Health

KW - Medline

KW - Unsupervised Play Addition

RP - NOT IN FILE

SP - 448

EP - 454

JF - Child: Care, Health &amp; Development

JA - Child Care Health Dev.

VL - 33

IS - 4

CY - England

N2 - **BACKGROUND:** Youth participation in sexual risk behaviours continues to be a critically important public health topic. Additionally, as youth are frequently being left alone during the day without adult supervision, there are increased opportunities for sexual risk-taking behaviour. This study examined how the relationships of nine youth assets and sexual activity may vary according to the stratification of youth into two groups: self-care and supervised. **METHODS:** Data were collected through at-home, in-person interviews from a random sample of inner-city youth (mean age = 15.4 years; 51.5% female; 48.8% White; 22.4% Black; 18.5% Hispanic; 10% Native American) and their parents (n = 1079 parent/youth pairs). Nine youth assets were analysed using multiple logistic regression. Examples of assets youth may possess are: positive role models, family communication, school connectedness, constructive use of time and aspirations for the future. The item used to assess sexual intercourse was 'Have you ever had sexual intercourse ("done it", "had sex", "made love", "gone all the way")?'. Asset/risk behaviour associations that were unique to one of the two strata were the focus of the study. **RESULTS:** Thirty-seven per cent of youth spent two or more hours per day home alone. Youth who were supervised had a greater number of unique significant associations between assets and sexual activity than youth who were in the self-care group. **CONCLUSIONS:** Youth in supervised settings may be less likely to participate in sexual activity because of the presence of assets. Certain assets may also be important in deterring sexual activity for youth who are in self-care

SN - 0305-1862

AD - Department of Health Administration and Policy, College of Public Health, University of Oklahoma Health Sciences Center, Oklahoma City, OK 73190, USA. lindsey-harris@ouhsc.edu

UR - 17584401

ER -

TY - JOUR

ID - 1587

T1 - Estimated maturity status and perceptions of adult autonomy support in youth soccer players

A1 - Cumming,S.P.

A1 - Battista,R.A.

A1 - Martyn,S.

A1 - Ewing,M.E.

A1 - Malina,R.M.

Y1 - 2006/10//

N1 - Cumming, Sean P. Battista, Rebecca A. Martyn, Standage. Ewing, Martha E. Malina, Robert M

Journal of sports sciences

8405364, kbt

IM

Journal Article

English

KW - Adolescent

KW - Age Factors

KW - Body Mass Index

KW - Child

KW - Female

KW - Humans

KW - Interpersonal Relations

KW - Linear Models

KW - Male

KW - Parent-Child Relations

KW - Personal Autonomy

KW - Physical Education and Training

KW - Predictive Value of Tests

KW - Puberty

KW - Research Design

KW - Sex Factors

KW - Soccer/sn [Statistics & Numerical Data]

KW - Soccer

KW - Social Perception

KW - Social Support

KW - Medline

KW - Unsupervised Play Addition

RP - NOT IN FILE

SP - 1039

EP - 1046

JF - Journal of Sports Sciences

JA - J Sports Sci

VL - 24

IS - 10

CY - England

N2 - In this study, we examined the relations between biological maturity status, body mass index, age, and perceptions of adult autonomy support in the context of youth soccer. A total of 70 female and 43 male soccer players, aged 9 - 15 years, completed three adult-specific versions (i.e. mother, father, coach) of the perceived autonomy support subscale from the Interpersonal Style Scale. The participants' percent predicted adult stature was used as an estimate of biological maturity status. Multiple linear regression analyses revealed that advanced maturity status in male players predicted lower perceptions of autonomy support from the coach. Maturity status was unrelated to perceptions of autonomy support from the coach in female soccer players, and paternal and maternal autonomy support in male and female players. Age and body mass index were unrelated to perceptions of adult (i.e. coach, mother, father) autonomy support in male and female players

SN - 0264-0414

AD - Department of Psychology, University of Washington, Seattle, WA 98195-1525, USA.

seanscot@u.washington.edu

UR - 17115515

ER -

TY - JOUR

ID - 1588

T1 - [Links between life events, traumatism and dementia; an open study including 565 patients with dementia]. [French]

A1 - Charles,E.

A1 - Bouby-Serieys,V.

A1 - Thomas,P.

A1 - Clement,J.P.

Y1 - 2006/10//

N1 - Charles, E. Bouby-Serieys, V. Thomas, P. Clement, J-P

L'Encephale

efb, 7505643

IM

English Abstract. Journal Article

French

KW - Aged

KW - 80 and over

KW - Alzheimer Disease/di [Diagnosis]

KW - Alzheimer Disease/ep [Epidemiology]

KW - Alzheimer Disease/px [Psychology]

KW - Female

KW - France

KW - Health Surveys

KW - Humans

KW - Life Change Events

KW - Male

KW - Mental Status Schedule

KW - Retrospective Studies

KW - Risk Factors

KW - Statistics as Topic

KW - Stress Disorders

KW - Post-Traumatic/di [Diagnosis]

KW - Post-Traumatic/ep [Epidemiology]

KW - Post-Traumatic/px [Psychology]

KW - Medline

KW - Unsupervised Play Addition

RP - NOT IN FILE

SP - 746

EP - 752

JF - Encephale

VL - 32

IS - 5 Pt 1

CY - France

N2 - **SUMMARY:** Ageing is due to a progressive loss of the person's adaptation capability, whereas during this period environmental aggression increases. In the elderly, life events re-present a psychological traumatism that overwhelms the old person and related family, disrupting and fragilising homeostatic balance. A number of authors have suggested a possible link between life traumatisms and the dementia processes. The aim of this study is to reveal the presence of life traumatisms preceding the apparition of the dementia syndrome.

**METHOD:** This is a retrospective and comparative work based on the PIXEL study on complaints and demands from the principle informal caregivers of Alzheimer patients. It includes 565 patients presenting the criterion of dementia as defined by the DSM IV, and questionnaires filled out by the principle caregivers. One item of the questionnaire referred to life events which could have played a part in the development of the disorder. In a second stage, the reported events were classified into 4 distinct categories: loss, repeated or prolonged stress, psychotraumatism and depression-inducing events. The statistics were produced using SAS and Stat 10 software. Student's test, ANOVA and chi2-test were used. **RESULTS:** 372 caregivers answered the first item (65%); 76 of them believed there was no event while 296 related the disorder to one or several life events (79% of responders, 52% of the sample). These results confirm Persson and Clement's study which evidenced a higher

frequency of stressing life events for subjects afflicted with dementia as compared with older people without any psychic disorder. Reported events and their respective frequency: spouse death (15.39%), parents' death (15%), familial difficulty (10.08%), anaesthesia (8.49%), child's death (4.42%), somatic disturbance (4%), depression (3.89%), retirement (3.89%), financial problems (2.65%), loneliness (2.65%), removal (1.76%), fall (1%), alcohol (0.8%), traumatism (0.53%), spouse care (0.35%), leaving for home care, storm and caregiver change in life (0.17%). Regrouping the data: 82.71% of the answers can be connected to prolonged stress, 62.85% to real or symbolic loss, 39% to a psychotraumatic event and finally, most of these events can potentially induce depression. **DISCUSSION:** Some of the events refer to difficulties concerning people close to the subject (death of a close relation, hospitalisation of husband or wife) in a period when the loss of autonomy or handicap means greater dependence on surrounding people. General anaesthesia is mentioned by 48 caregivers. In fact, this usually implies surgery, the presence of organic pathology or the need for hospitalisation, which we know has a destabilizing effect in the elderly. It is therefore not surprising that 23 answers mentioned somatic disorders (4% of the sample). According to Leger, it's mostly a loss type event which is implied in the elderly. Such losses would induce a weakening of cognitive stimulation which could decompensate an infraclinical dementia or accelerate an emerging dementia process. Antecedents of depressive illness are considered as an element of risk for the development of Alzheimer's disease. Depression is spontaneously mentioned by 22 caregivers. We must add the many reported life events which are well known to induce depression in older people. Most of the events considered in this study are liable to provoke manic mood swings. Depression resulting from life events can be considered either as an affection occurring along with dementia or as the aggravating factor of an infraclinical process or, finally, as an additional factor of vulnerability. With older people, many events may constitute a trauma because of the proximity of death and because of their sudden onset (fall, hospitalisation, somatic illness). Several studies have pointed out that a particularly traumatic event could enhance the risk of dementia. Life events associated with chronic or repeated stress are characterized by their permanence or their repetition. According to a general psychosomatic biological pattern, psychic distress will engender a series of degradations or an acute or chronic response to an early trauma. According to this hypothesis, prolonged exposure to an excess of glucocorticosteroids at the time of a disadapative stress would have deleterious effects on the hippocampus. Indeed, the hippocampus plays a part in a number of functions affected by dementia such as memory, learning process and emotional adjustment. This study takes into account stress factors ("stressors") but not factors influencing their impact on the subject such as an individual predisposition (genetic, psychopathologic, coping abilities) and social support. The force of the impact of these events on older people and what is really experienced by them remain unknown. This study strengthens a number of others evincing an unusual frequency of life events in dementia processes. According to an integrative pattern, repeated or prolonged stress could be a deciding factor in the degenerative process or a factor of decompensation with older people presenting a genetic, biological or psychological vulnerability to dementia. The impact of such life events would vary according to the subject's pre-morbid personality, coping abilities and the support he/she can rely on. **CONCLUSION:** Some life events may be involved in the dementia process as shown by the results of this study, but this relationship does not imply direct causality. It's difficult to appreciate whether these results are not a consequence of the greater attention paid to the patient after the appearance of the first symptoms, leading to a closer observation. Stress could trigger the degenerative process. This argues for the necessity of an early diagnosis taking into account a traumatic event of life either precocious or late

SN - 0013-7006

AD - Service Hospitalo-Universitaire de Psychiatrie Adulte (Professeur Clement), Centre Hospitalier Esquirol, 15, rue du docteur Marcland, 87025 Limoges cedex

UR - 17099599

ER -

TY - JOUR

ID - 1589

T1 - Law, pregnancy and sport: what are the repercussions when a pregnant lady plays?

A1 - Werren, J.

Y1 - 2006/08//

N1 - Werren, Julia

Journal of law and medicine

9431853

IM

Journal Article. Legal Cases

English

KW - Australia

KW - Female

KW - Guidelines as Topic

KW - Humans

KW - LIABILITY

KW - Legal

KW - Organizational Policy

KW - Organizations/lj [Legislation & Jurisprudence]

KW - Organizations/st [Standards]

KW - Personal Autonomy

KW - Pregnancy

KW - Pregnant Women

KW - Prenatal Injuries/pc [Prevention & Control]

KW - Prenatal Injuries

KW - Risk Assessment

KW - Risk-Taking

KW - Sports/lj [Legislation & Jurisprudence]

KW - Medline

KW - Unsupervised Play Addition

RP - NOT IN FILE

SP - 45

EP - 63

JF - Journal of Law & Medicine

JA - J Law Med

VL - 14

IS - 1

CY - Australia

N2 - This article reflects on the issue of pregnancy and sport that was brought to the fore in *Gardner v National Netball League* (2001) 182 ALR 408; [2001] FMCA 50 and *Gardner v All Australia Netball Association Ltd* (2003) 174 FLR 452. It suggests that these cases did not provide a definitive discussion of the tortious liability implications that initially led Netball Australia to introduce a ban on pregnant players. In an attempt to fill some of these gaps, other case law that deals with liability of sporting organisations and prenatal injury is discussed. The article primarily focuses on whether the unborn child when born alive will have an action against her or his mother as a result of injury occasioned while the mother was playing sport when pregnant. This examination is undertaken in light of recent Australian tort reform as well as changes in policy direction. The article summarises the legal position of the parties involved in sport--sporting organisations, medical practitioners, other participants and the pregnant mother--and argues that, with reference to the guidelines and case law, in only a very small number of cases would liability be found against the sporting organisation or pregnant mother as a result of injuries incurred prenatally

SN - 1320-159X

AD - Faculty of Law, University of New England. jwerren@une.edu.au

UR - 16937781

ER -

TY - JOUR

ID - 1590

T1 - Reading and spelling abilities in children with severe speech impairments and cerebral palsy at 6, 9, and 12 years of age in relation to cognitive development: a longitudinal study

A1 - Dahlgren,Sandberg A.

Y1 - 2006/08//

N1 - Dahlgren Sandberg, Annika

Developmental medicine and child neurology

0006761, e83

IM

Comparative Study. Journal Article. Research Support, Non-U.S. Gov't  
English

KW - Adolescent  
 KW - Case-Control Studies  
 KW - Cerebral Palsy/co [Complications]  
 KW - Cerebral Palsy/px [Psychology]  
 KW - Child  
 KW - Child Development  
 KW - Child Language  
 KW - Preschool  
 KW - Cognition  
 KW - Developmental Disabilities/et [Etiology]  
 KW - Developmental Disabilities/px [Psychology]  
 KW - Disabled Children/px [Psychology]  
 KW - Dystonia/co [Complications]  
 KW - Dystonia/px [Psychology]  
 KW - Female  
 KW - Follow-Up Studies  
 KW - Humans  
 KW - Intelligence  
 KW - Male  
 KW - Matched-Pair Analysis  
 KW - Reading  
 KW - Severity of Illness Index  
 KW - Speech Articulation Tests  
 KW - Speech Disorders/co [Complications]  
 KW - Speech Disorders/px [Psychology]  
 KW - Statistics  
 KW - Nonparametric  
 KW - Verbal Behavior  
 KW - Medline  
 KW - Unsupervised Play Addition  
 RP - NOT IN FILE  
 SP - 629  
 EP - 634  
 JF - Developmental Medicine & Child Neurology  
 JA - Dev.Med Child Neurol.  
 VL - 48  
 IS - 8  
 CY - England

N2 - Development of literacy skills was studied in six children (one male, five females) with severe speech impairments and cerebral palsy (CP). These skills were related to intellectual development, phonological abilities, and short-term memory. Three of the children were diagnosed with dystonia, and three with diplegia. They had no, or severely restricted, independent mobility (Gross Motor Function Classification System Level IV for four children and Level V for two), and severe fine motor problems, including difficulty with pointing. As they had no intelligible speech, the Bliss system was the primary communication mode. Assessments were made at approximately 6, 9, and 12 years of age. The results revealed that the children had difficulties acquiring literacy skills, although intellectual level and phonological ability predicted otherwise. Positive development during the first 3 years was followed by an arrest. A conspicuous decrease in IQ points was also found. Thus, phonological ability does not seem to have the same predictive power for literacy development in children with severe speech impairments and CP as in typically developing children. Further studies are needed to clarify the role of phonological abilities, working memory, and strategies used in literacy acquisition in these children. Such studies might also clarify the importance of articulatory abilities in early literacy acquisition

SN - 0012-1622

AD - Department of Psychology, Goteborg University, Box 500, SE-405 30 Goteborg, Sweden.  
 Annika.Dahlgren.Sanberg@psy.gu.se



UR - 16836773

ER -

TY - JOUR

ID - 1591

T1 - Mother-child play and emerging social behaviors among infants from maltreating families

A1 - Valentino,K.

A1 - Cicchetti,D.

A1 - Toth,S.L.

A1 - Rogosch,F.A.

Y1 - 2006/05//

N1 - Valentino, Kristin. Cicchetti, Dante. Toth, Sheree L. Rogosch, Fred A

Developmental psychology

0260564, cn8

IM

Journal Article. Research Support, N.I.H., Extramural

English

KW - Adult

KW - Child Abuse

KW - Cognition

KW - Family

KW - Female

KW - Humans

KW - Infant

KW - Maternal Age

KW - Mother-Child Relations

KW - Play and Playthings

KW - Social Behavior

KW - Medline

KW - Unsupervised Play Addition

RP - NOT IN FILE

SP - 474

EP - 485

JF - Developmental Psychology

JA - Dev.Psychol.

VL - 42

IS - 3

CY - United States

N2 - Mother-child play of 12-month-old infants (N=130) from maltreating (N=78) and non-maltreating (N=52) families was analyzed as a context that integrates infants' developing social and cognitive skills. Play was coded from semistructured and unstructured play paradigms. No group differences were found in infants' play maturity. Infants from abusing families demonstrated more imitative play than infants from non-maltreating families, and engaged in less independent play than infants from both neglecting and non-maltreating families, suggesting a delay in emerging social behaviors. Mothers from abusing and non-maltreating families differed in attention directing behaviors. Maternal behaviors predicted child play style variables, but did not mediate the effects of maltreatment. Findings discuss the influence of an early maltreating environment upon the development of the emergent self. Implications for early intervention are underscored. ((c) 2006 APA, all rights reserved)

SN - 0012-1649

AD - Mt. Hope Family Center, University of Rochester, Rochester, NY 14608, USA.

valentik@psych.rochester.edu

UR - 16756439

ER -

TY - JOUR

ID - 1592

T1 - Smart wheelchairs: A literature review. [Review] [45 refs]

A1 - Simpson,R.C.

Y1 - 2005/07//

N1 - Simpson, Richard C

Journal of rehabilitation research and development

8410047, jrd

IM

Historical Article. Journal Article. Review

English

KW - Activities of Daily Living

KW - Adult

KW - Child

KW - Communication Aids for Disabled

KW - Electronics/is [Instrumentation]

KW - Electrooculography

KW - Equipment Design

KW - History

KW - 20th Century

KW - 21st Century

KW - Humans

KW - Infrared Rays

KW - Robotics/is [Instrumentation]

KW - Software

KW - Therapy

KW - Computer-Assisted/is [Instrumentation]

KW - Ultrasonics/cl [Classification]

KW - User-Computer Interface

KW - Wheelchairs/cl [Classification]

KW - Wheelchairs/hi [History]

KW - Wheelchairs

KW - Medline

KW - Unsupervised Play Addition

RP - NOT IN FILE

SP - 423

EP - 436

JF - Journal of Rehabilitation Research & Development

JA - J Rehabil Res Dev

VL - 42

IS - 4

CY - United States

N2 - Several studies have shown that both children and adults benefit substantially from access to a means of independent mobility. While the needs of many individuals with disabilities can be satisfied with traditional manual or powered wheelchairs, a segment of the disabled community finds it difficult or impossible to use wheelchairs independently. To accommodate this population, researchers have used technologies originally developed for mobile robots to create "smart wheelchairs." Smart wheelchairs have been the subject of research since the early 1980s and have been developed on four continents. This article presents a summary of the current state of the art and directions for future research. [References: 45]

SN - 1938-1352

AD - Department of Rehabilitation Science and Technology, University of Pittsburgh, Pittsburgh, PA 15238-2887, USA. ris20@pitt.edu

UR - 16320139

ER -

TY - JOUR

ID - 1593

T1 - Relations between parents' interactive style in dyadic and triadic play and toddlers' symbolic capacity

A1 - Keren,M.  
A1 - Feldman,R.  
A1 - Namdari-Weinbaum,I.  
A1 - Spitzer,S.  
A1 - Tyano,S.  
Y1 - 2005/10//  
N1 - Keren, M. Feldman, R. Namdari-Weinbaum, I. Spitzer, S. Tyano, S  
The American journal of orthopsychiatry  
3r6, 0400640  
IM  
Comparative Study. Journal Article  
English  
KW - Adult  
KW - Aggression/px [Psychology]  
KW - Child  
KW - Preschool  
KW - Creativity  
KW - Father-Child Relations  
KW - Female  
KW - Gender Identity  
KW - Humans  
KW - Intelligence  
KW - Male  
KW - Marriage/px [Psychology]  
KW - Mother-Child Relations  
KW - Parenting/px [Psychology]  
KW - Play and Playthings  
KW - Symbolism  
KW - Medline  
KW - Unsupervised Play Addition  
RP - NOT IN FILE  
SP - 599  
EP - 607  
JF - American Journal of Orthopsychiatry  
JA - Am J Orthopsychiatry  
VL - 75  
IS - 4  
CY - United States  
N2 - Play has a major role in the evaluation and treatment of young children referred to mental health clinicians. The present study examined parental correlates of preschoolers' symbolic play during dyadic and triadic play interactions. Boys' play contained more aggressive themes, and girls' contained more nurturing themes. Mothers displayed more caring themes during play with both sons and daughters, and fathers displayed more repair and construction themes. Mothers' and fathers' facilitative- creative interaction style in dyadic play predicted the level of the child's symbolic play. Co-parenting style marked by cooperation and autonomy predicted symbolic play during a triadic family session. Child intelligence predicted symbolic play beyond the parent's style during triadic but not dyadic interactions. The findings have implications for early intervention directed at increasing symbolic play in young children  
SN - 0002-9432  
AD - Community Infant Mental Health Unit, Sackler Medical School, Petah Tiqwa, Israel. ofkeren@internet-zahav.net  
UR - 16262517  
ER -  
  
TY - JOUR  
ID - 1594  
T1 - Poor neighborhoods: safe playgrounds

A1 - Powell,E.C.

A1 - Ambardekar,E.J.

A1 - Sheehan,K.M.

Y1 - 2005/09//

N1 - Powell, Elizabeth C. Ambardekar, Erin J. Sheehan, Karen M

Journal of urban health : bulletin of the New York Academy of Medicine

c51, 9809909

IM

Journal Article. Research Support, Non-U.S. Gov't

English

KW - Chicago

KW - Child

KW - Consumer Product Safety

KW - Humans

KW - Play and Playthings

KW - Poverty Areas

KW - Urban Population

KW - Waste Products

KW - Wounds and Injuries/pc [Prevention & Control]

KW - Medline

KW - Unsupervised Play Addition

RP - NOT IN FILE

SP - 403

EP - 410

JF - Journal of Urban Health

JA - J Urban Health

VL - 82

IS - 3

CY - United States

N2 - Although unstructured physical play is helpful to child development and physical activity is important to obesity prevention, up-to-date information about playgrounds and playground hazards in urban areas is limited. Local data are needed to identify problems and target interventions. The aim of this study was to describe the hazards in playgrounds located in low-income (median dollars 28,728-38,915) and very low-income (median dollars 18,266-18,955) Chicago neighborhoods. Using a standardized on-site survey (National Program for Playground Safety), two investigators reviewed seventy-eight public playgrounds for hazards related to playground design, safe surfaces, supervision, and equipment design and maintenance. The design of 56 playgrounds (72%) posed no hazards. One playground lacked protection from motor vehicles, and 21 had minor flaws. One playground had an asphalt surface; all others had protective surfaces, usually wood chips. The chips were too thin in many places, and in 15 playgrounds (19%), at least one concrete footing was exposed. Trash was a common surface hazard (68%). Although most equipment was safe (swings of soft materials and appropriate platform barriers), many pieces needed repairs. Equipment maintenance hazards included gaps (44%) and missing (38%) or broken parts (35%). In 13 of 39 playgrounds (33%) where children were observed playing, one or more were unsupervised. Playgrounds in very low-income neighborhoods more often had trash in the fall zone and exposed footings ( $P < .01$  for each); there were no differences between low and very low-income neighborhoods in playground design or equipment maintenance. We conclude that playgrounds in low-income Chicago neighborhoods are of good design and have appropriate surfaces. Needed improvements include attention to wood chip depth, the removal of trash from the fall zone, and equipment repairs. Greater adult supervision is warranted

SN - 1099-3460

AD - Division of Pediatric Emergency Medicine, Box 62, Children's Memorial Hospital, 2300 Children's Plaza, Chicago, IL 60614, USA. epowell@northwestern.edu

UR - 16033929

ER -

TY - JOUR

ID - 1595

T1 - The compound thoracodorsal perforator flap in the treatment of combined soft-tissue defects of sole and dorsum of the foot

A1 - Van, Landuyt K.

A1 - Hamdi, M.

A1 - Blondeel, P.

A1 - Monstrey, S.

Y1 - 2005/04//

N1 - Van Landuyt, K. Hamdi, M. Blondeel, Ph. Monstrey, S

British journal of plastic surgery

b0w, 2984714r

IM

Case Reports. Journal Article

English

KW - Adolescent

KW - Adult

KW - Aged

KW - Child

KW - Preschool

KW - Female

KW - Foot Injuries/pa [Pathology]

KW - Foot Injuries/su [Surgery]

KW - Humans

KW - Infant

KW - Male

KW - Microcirculation

KW - Microsurgery/mt [Methods]

KW - Middle Aged

KW - Reconstructive Surgical Procedures/mt [Methods]

KW - Soft Tissue Injuries/pa [Pathology]

KW - Soft Tissue Injuries/su [Surgery]

KW - Surgical Flaps/bs [Blood Supply]

KW - Surgical Flaps

KW - Medline

KW - Unsupervised Play Addition

RP - NOT IN FILE

SP - 371

EP - 378

JF - British Journal of Plastic Surgery

JA - Br J Plast Surg

VL - 58

IS - 3

CY - England

N2 - Nine cases of massive soft-tissue loss of the foot were reconstructed by means of a compound (chimera) thoracodorsal artery perforator (TAP) flap, which reconstituted the different functional units (dorsum, heel, instep, weight-bearing surface). In each case, the flap consisted of a skin component isolated on its perforator in combination with a portion of latissimus dorsi muscle and/or serratus fascia, all pedicled on the thoracodorsal vessels. The pedicle length allows up to 4-6 cm of independent mobility of the skin island. The mobility of the various flap components allows the various functional units of the foot to be reconstructed without relying on multiple flaps or anastomoses. The pedicle length was sufficient to be able to perform the anastomosis out of the zone of injury. In some cases the skin island was harvested along with intercostal nerve branches, this gave us the potential to develop a sensate flap. The indications and advantages of this reconstructive method are discussed

SN - 0007-1226

AD - Department of Plastic Surgery, University Hospital Gent, De Pintelaan 185, B-9000 Gent, Belgium.

koenraad.vanlanduyt@ugent.be

UR - 15780233

ER -

TY - JOUR

ID - 1596

T1 - The effects of maternal depression and parental conflict on children's peer play

A1 - Hipwell,A.E.

A1 - Murray,L.

A1 - Ducournau,P.

A1 - Stein,A.

Y1 - 2005/01//

N1 - Hipwell, A E. Murray, L. Ducournau, P. Stein, A

Child: care, health and development

7602632, c9x

IM

Journal Article. Research Support, Non-U.S. Gov't

English

KW - Adult

KW - Aggression/px [Psychology]

KW - Child Behavior/px [Psychology]

KW - Child of Impaired Parents

KW - Child

KW - Preschool

KW - Conflict (Psychology)

KW - Cooperative Behavior

KW - Depression

KW - Postpartum/px [Psychology]

KW - Female

KW - Humans

KW - Infant

KW - Male

KW - Mother-Child Relations

KW - Mothers/px [Psychology]

KW - Parents/px [Psychology]

KW - Peer Group

KW - Personal Autonomy

KW - Play and Playthings/px [Psychology]

KW - Prospective Studies

KW - Regression Analysis

KW - Sex Factors

KW - Statistics as Topic

KW - Medline

KW - Unsupervised Play Addition

RP - NOT IN FILE

SP - 11

EP - 23

JF - Child: Care, Health & Development

JA - Child Care Health Dev.

VL - 31

IS - 1

CY - England

N2 - BACKGROUND: Little is known about the relative effects of exposure to postnatal depression and parental conflict on the social functioning of school-aged children. This is, in part, because of a lack of specificity in the measurement of child and parental behaviour and a reliance on children's reports of their hypothetical responses to conflict in play. METHODS: In the course of a prospective longitudinal study of children of postnatally depressed and well women, 5-year-old children were videotaped at home with a friend in a naturalistic dressing-up play setting. As well as examining possible associations between the occurrence of

postnatal depression and the quality of the children's interactions, we investigated the influence of parental conflict and co-operation, and the continuity of maternal depression. The quality of the current mother-child relationship was considered as a possible mediating factor. RESULTS: Exposure to postnatal depression was associated with increased likelihood, among boys, of displaying physical aggression in play with their friend. However, parental conflict mediated the effects of postnatal depression on active aggression during play, and was also associated with displays of autonomy and intense conflict. While there were no gender effects in terms of the degree or intensity of aggressive behaviours, girls were more likely to express aggression verbally using denigration and gloating whereas boys were more likely to display physical aggression via interpersonal and object struggles. CONCLUSIONS: The study provided evidence for the specificity of effects, with strong links between parental and child peer conflict. These effects appear to arise from direct exposure to parental conflict, rather than indirectly, through mother-child interactions

SN - 0305-1862

AD - Department of Psychiatry, School of Medicine, University of Pittsburgh, Pittsburgh, PA 15213, USA.

hipwellae@upmc.edu

UR - 15658962

ER -

TY - JOUR

ID - 1598

T1 - [Transitional objects in the Maghreb]. [French]

A1 - Farad-Bensenouci,S.

Y1 - 2004/12//

N1 - Farad-Bensenouci, Samia

Soins. Pediatrie, puericulture

9604503, cjc

N

Journal Article

French

KW - Africa

KW - Northern/eh [Ethnology]

KW - Anxiety

KW - Separation/eh [Ethnology]

KW - Separation/pc [Prevention & Control]

KW - Child

KW - Child Behavior/eh [Ethnology]

KW - Child Psychology

KW - Preschool

KW - Cultural Diversity

KW - Humans

KW - Object Attachment

KW - Personal Autonomy

KW - Play and Playthings/px [Psychology]

KW - Medline

KW - Unsupervised Play Addition

RP - NOT IN FILE

SP - 25

JF - Soins

JA - Soins Pediatr Pueric.

VL - Pediatrie, Puericulture.

IS - 221

CY - France

SN - 1259-4792

AD - Service de medecine interne A, CHRU de Tours (37)

UR - 15636207

ER -

TY - JOUR

ID - 1599

T1 - Pamidronate treatment of less severe forms of osteogenesis imperfecta in children

A1 - Zacharin, M.

A1 - Kanumakala, S.

Y1 - 2004/11//

N1 - Zacharin, Margaret. Kanumakala, Shankar

Journal of pediatric endocrinology & metabolism : JPEM

bu0, 8510464, cef, 9508900

IM

Clinical Trial. Journal Article

English

KW - Absorptiometry

KW - Photon

KW - Adolescent

KW - Alkaline Phosphatase/bl [Blood]

KW - Body Height

KW - Body Weight/ph [Physiology]

KW - Bone Density/de [Drug Effects]

KW - Bone Density/ph [Physiology]

KW - Bone and Bones/me [Metabolism]

KW - Child

KW - Preschool

KW - Cohort Studies

KW - Diphosphonates/tu [Therapeutic Use]

KW - Female

KW - Humans

KW - Male

KW - Osteoblasts/de [Drug Effects]

KW - Osteoclasts/de [Drug Effects]

KW - Osteogenesis Imperfecta/co [Complications]

KW - Osteogenesis Imperfecta/dt [Drug Therapy]

KW - Osteogenesis Imperfecta/ra [Radiography]

KW - Pain/ep [Epidemiology]

KW - Pain/et [Etiology]

KW - Puberty/ph [Physiology]

KW - Medline

KW - Unsupervised Play Addition

RP - NOT IN FILE

SP - 1511

EP - 1517

JF - Journal of Pediatric Endocrinology

JA - J Pediatr Endocrinol

VL - 17

IS - 11

CY - England

N2 - BACKGROUND: Bisphosphonate therapy improves bone quality in children with severe osteogenesis imperfecta (OI). Children with milder phenotypes also have prepubertal fractures, bone pain and reduced bone mass, predisposing them to adult osteoporosis. OBJECTIVE: To evaluate treatment effects of pamidronate in children with mild phenotypes of OI. METHODS: Open label, 2-year observational study of 18 patients, using pamidronate, with clinical, biochemical and radiological monitoring. RESULTS: Over 2 years, bone pain decreased from 16 to 1 patient and disturbed sleep from 12 children to 0. Independent mobility improved from 10 to 17 children. Fracture incidence decreased from 1.6 to 0.5 fractures/child/year. Surgical interventions decreased from a mean 1.3 procedures/patient to 0 in the second year of treatment. Growth velocity remained stable at a mean 4.8 cm/year. Mean lumbar vertebral bone mineral density improved by 40.8%, from 0.375 to 0.528 g/cm<sup>2</sup> (p <0.0001), z-score from -3.77 to -2.44 (p <0.0001). Mean vertebral height improved by 17.3%,



from 15.6 to 18.38 mm ( $p = 0.07$ ); plasma alkaline phosphatase decreased from 222 to 169 U/l ( $p = 0.0009$ ) and urinary deoxypyridinoline crosslinks decreased from 26.7 to 21.8 nmol/mmol creatinine ( $p = 0.21$ ). Two children with vitamin D insufficiency were concurrently treated. A significant association ( $r = -0.6$ ,  $p = 0.008$ ) was shown between age at start of treatment and percentage change in BMD after 2 years. CONCLUSIONS: Pamidronate treatment improves bone quality in children with mild types of OI. It ameliorates clinical symptoms, improves mobility, reduces fracture frequency and thus improves quality of life and in future is likely to reduce the severity and consequences of adult osteoporosis by improved peak bone mass in these children

SN - 0334-018X

AD - Department of Endocrinology and Diabetes, Royal Children 's Hospital, Melbourne, Australia.

margaret.zacharin@rch.org.au

UR - 15570988

ER -

TY - JOUR

ID - 1600

T1 - Social competence in young children with inflicted traumatic brain injury

A1 - Landry,S.H.

A1 - Swank,P.

A1 - Stuebing,K.

A1 - Prasad,M.

A1 - Ewing-Cobbs,L.

Y1 - 2004///

N1 - Landry, Susan H. Swank, Paul. Stuebing, Karla. Prasad, Mary. Ewing-Cobbs, Linda

Developmental neuropsychology

dx, 8702038

IM

Comparative Study. Journal Article. Research Support, U.S. Gov't, P.H.S.

English

KW - Analysis of Variance

KW - Brain Injuries/pp [Physiopathology]

KW - Brain Injuries/px [Psychology]

KW - Child

KW - Preschool

KW - Cognition/ph [Physiology]

KW - Competitive Behavior/ph [Physiology]

KW - Demography

KW - Developmental Disabilities

KW - Female

KW - Follow-Up Studies

KW - Humans

KW - Infant

KW - Male

KW - Motor Activity/ph [Physiology]

KW - Neuropsychological Tests/sn [Statistics & Numerical Data]

KW - Play and Playthings

KW - Prospective Studies

KW - Reproducibility of Results

KW - Social Behavior

KW - Trauma Severity Indices

KW - Verbal Behavior/ph [Physiology]

KW - Medline

KW - Unsupervised Play Addition

RP - NOT IN FILE

SP - 707

EP - 733

JF - Developmental Neuropsychology

JA - Dev Neuropsychol

VL - 26

IS - 3

CY - United States

N2 - As infants develop skills that allow for increasing independence in social and cognitive domains, they acquire the ability to identify goals, sequence behaviors to carry out goals, and to flexibly use strategies for attaining goals in both social and independent play contexts. Little is known about how brain injury in young children may disrupt the precursors to such executive processes. In this study, we examined social and cognitive competence in 25 infants ages 3 to 23 months who sustained moderate to severe traumatic brain injury (TBI) secondary to physical abuse and in 22 healthy community comparison children. Children with TBI were evaluated an average of 1.6 months after the injury. A toy-centered activity with the examiner was used to capture joint attention and social behavior and an exploratory toy play situation was used to measure independent goal-directed play. The inflicted TBI group showed significant reduction in both social and cognitive domains relative to the comparison group. Canonical correlation analyses disclosed that inflicted TBI was associated with reduction in (a) initiation of social interactions, (b) responsiveness to interactions initiated by the examiner, (c) positive affect, and (d) compliance. The groups performed comparably on indexes of gestural and verbal communication and for the occurrence of negative affect. Joint attention was an area of vulnerability for the TBI group in both social initiation and response contexts. Although general cognitive and motor scores were lower in the inflicted TBI group, the complexity of independent toy play did not differ across groups. Early brain injury causes significant disruption in behaviors regulating initiation and responsiveness in social contexts. Longitudinal follow-up will characterize the long-term consequences of early disruption in joint attention and other behaviors on the development of social and cognitive precursors to executive processes

SN - 8756-5641

AD - Division of Developmental Pediatrics, University of Texas Health Science Center at Houston, 77030, USA. susan.h.landry@uth.tmc.edu

UR - 15525566

ER -

TY - JOUR

ID - 1601

T1 - Improving functional skills and physical fitness in children with Rett syndrome

A1 - Lotan,M.

A1 - Isakov,E.

A1 - Merrick,J.

Y1 - 2004/11//

N1 - Lotan, M. Isakov, E. Merrick, J

Journal of intellectual disability research : JIDR

9206090, bga

IM

Journal Article

English

KW - Activities of Daily Living/px [Psychology]

KW - Child

KW - Education of Intellectually Disabled

KW - Exercise/px [Psychology]

KW - Feasibility Studies

KW - Female

KW - Humans

KW - Motor Skills

KW - Physical Fitness

KW - Rett Syndrome/px [Psychology]

KW - Rett Syndrome/rh [Rehabilitation]

KW - Social Behavior

KW - Statistics as Topic

KW - Treatment Outcome

KW - Medline

KW - Unsupervised Play Addition

RP - NOT IN FILE

SP - 730

EP - 735

JF - Journal of Intellectual Disability Research

JA - J Intellect Disabil Res

VL - 48

IS - Pt 8

CY - England

N2 - **BACKGROUND:** To investigate the feasibility of a physical exercise programme with treadmill for persons with Rett syndrome (RS) in order to promote fitness and health. **METHODS:** A daily training programme on a treadmill was designed for four females with RS over a period of 2 months with tests performed in three intervals, at time 1, 2 and 3, 2 months apart with intervention taking place between tests 2 and 3. Participants were four girls with RS aged 8.5-11 years (mean: 10 years) attending the educational facility Beit Issie Shapiro, Raanana, Israel, all with independent mobility and with typical characteristics of RS stage III. The training took place at the educational facility, on a 1400 model treadmill (Trimline, capable of very low speeds < 0.5 k/h), with very long side rails. Special low side rails were adapted to the treadmill in order to fit the height of the children and velcro straps were added to assist in safely placing the hands. Pulse was monitored constantly during exercise by an A3 polar pulse belt. Pulse measurements at rest during training were considered as evaluators of aerobic physical condition. Functional measurement was based on a scale specially established for the present study. The scale was a 31-item motor-functioning tool that measures the ability of participants to knee walk and knee stand, to get up to a standing position, duration of walking different paths, and to go up and down stairs and slopes. **RESULTS:** The study showed that physical fitness of the children at the end of the training programme had improved considerably ( $P < 0.05$ ). Tests showed that general functional abilities had improved considerably ( $P < 0.0001$ ). Although all items of the functional ability measure showed impressive positive change, some of the 31 items on it showed statistically significant improvement (knee walking, going up and down stairs and speed of walking for 25 m. Pearson correlation showed high linkage ( $r = -0.76$ ) between functional improvement and change in physical fitness. **CONCLUSIONS:** Physical fitness programme executed on a daily basis is capable of improving functional ability of children with RS. Nonprofessional personnel can execute such a programme under supervision of a qualified physical therapist

SN - 0964-2633

AD - Zvi Quittman Residential Center, The Millie Shime Campus, Elwyn Jerusalem, Israel

UR - 15494062

ER -

TY - JOUR

ID - 1602

T1 - A paediatric trauma study of scooter injuries

A1 - Fong,C.P.

A1 - Hood,N.

Y1 - 2004/04//

N1 - Fong, Christina P H. Hood, Natalie

Emergency medicine Australasia : EMA

101199824

IM

Journal Article

English

KW - Adolescent

KW - Athletic Injuries/ep [Epidemiology]

KW - Athletic Injuries/pc [Prevention & Control]

KW - Child

KW - Preschool

KW - Female

KW - Fractures

KW - Bone/ep [Epidemiology]

KW - Humans  
 KW - Incidence  
 KW - Male  
 KW - Play and Playthings/in [Injuries]  
 KW - Prospective Studies  
 KW - Risk Factors  
 KW - Soft Tissue Injuries/ep [Epidemiology]  
 KW - Statistics  
 KW - Nonparametric  
 KW - Victoria/ep [Epidemiology]  
 KW - Medline  
 KW - Unsupervised Play Addition  
 RP - NOT IN FILE  
 SP - 139  
 EP - 144  
 JF - Emergency Medicine Australasia  
 JA - Emerg Med Australas  
 VL - 16  
 IS - 2  
 CY - Australia

N2 - OBJECTIVE: To investigate the incidence and describe the nature of non-motorized scooter related injuries in children presenting to the ED. SETTING: Paediatric ED of a metropolitan tertiary referral hospital. METHODS: A prospective observational study of patients aged under 19 years presenting with injuries sustained while using a non-motorized scooter. Clinicians recorded the data in the patient record. Main outcome measures: type of injury sustained; period of experience on the scooter; the use of protective gear; the presence of adult supervision; the place of accident; and the patient outcome. RESULTS: Sixty-two eligible patients were recruited over an 18 month period. The incidence of scooter-related injuries was 1.3% of all paediatric trauma presentations. There was a fall in scooter injury presentations over the study period; however, this was not statistically significant. The most common injury sustained using a scooter was an upper limb fracture (41.9%). Closed head injury comprised 8.1% of all scooter related injuries. The majority of patients were not wearing protective gear and were unsupervised at the time of their accident. Most patients (79%) were managed in the ED and discharged. CONCLUSIONS: There has been no significant change in scooter injury presentations over the two summer periods of 2000 and 2001. Children presenting to the ED with a scooter related injury tend to be primary school aged, which may have implications on scooter design, age recommendations and safety guidelines

SN - 1742-6731

AD - Department of Emergency Medicine, Monash Medical Centre, Melbourne, Victoria, Australia

UR - 15239729

ER -

TY - JOUR

ID - 1604

T1 - Autonomy, sanity and moral theory

A1 - Law,I.

Y1 - 2003///

N1 - Law, Iain

Res publica (Liverpool, England)

100973395

E

Journal Article

English

KW - Adult

KW - Child

KW - Coercion

KW - Ethical Theory

KW - Humans

KW - Mental Competency  
 KW - Mentally Ill Persons  
 KW - Models  
 KW - Theoretical  
 KW - Personal Autonomy  
 KW - Treatment Refusal  
 KW - Medline  
 KW - Unsupervised Play Addition  
 RP - NOT IN FILE  
 SP - 39  
 EP - 56  
 JF - Res Publica  
 VL - 9  
 IS - 1  
 CY - England

N2 - The concept of autonomy plays at least two roles on moral theory. First, it provides a source of constraints upon action: because I am autonomous you may not interfere with me, even for my own good. Second, it provides a foundation for moral theory: human autonomy has been thought by some to produce moral principles of a more general kind. This paper seeks to understand what autonomy is, and whether the autonomy of which we are capable is able to serve these roles. We would naturally hope for a concept of autonomy that is value-neutral rather than value-laden. That is to say, we would want the judgement that I am autonomous to depend wholly on, say, structural features of my psychology, and in no way to require us to make ethical judgements, or other value judgements. Being value-neutral is perhaps desirable in a concept of autonomy serving the first role, and plausibly indispensable in one playing the second. I shall argue, however, that value-neutral conceptions of autonomy are impoverished and out of line with our intentions; set out and defend an explicitly value-laden conception of autonomy; and explore the implications of such a view for the ability of autonomy to play the roles mentioned above

SN - 1356-4765

AD - Department of Philosophy, University of Birmingham, Edgbaston, Birmingham, B15 2TT, UK.

lawir@hhs.bham.ac.uk

UR - 15199941

ER -

TY - JOUR

ID - 1606

T1 - Rates of pediatric injuries by 3-month intervals for children 0 to 3 years of age

A1 - Agran,P.F.

A1 - Anderson,C.

A1 - Winn,D.

A1 - Trent,R.

A1 - Walton-Haynes,L.

A1 - Thayer,S.

Y1 - 2003/06//

N1 - Agran, Phyllis F. Anderson, Craig. Winn, Diane. Trent, Roger. Walton-Haynes, Lynn. Thayer, Sharon Pediatrics

oxv, 0376422

AIM, IM

Journal Article. Multicenter Study. Research Support, U.S. Gov't, P.H.S.

English

KW - Accidental Falls/mo [Mortality]

KW - Accidental Falls/sn [Statistics & Numerical Data]

KW - Accidents

KW - Traffic/mo [Mortality]

KW - Traffic/sn [Statistics & Numerical Data]

KW - Age Distribution

KW - Battered Child Syndrome/ep [Epidemiology]

KW - Battered Child Syndrome/mo [Mortality]  
 KW - Burns/ep [Epidemiology]  
 KW - Burns/mo [Mortality]  
 KW - Child Abuse/mo [Mortality]  
 KW - Child Abuse/sn [Statistics & Numerical Data]  
 KW - Child  
 KW - Hospitalized/sn [Statistics & Numerical Data]  
 KW - Preschool  
 KW - Death Certificates  
 KW - Drowning/ep [Epidemiology]  
 KW - Drowning/mo [Mortality]  
 KW - Foreign Bodies/ep [Epidemiology]  
 KW - Foreign Bodies/mo [Mortality]  
 KW - Health Care Surveys/sn [Statistics & Numerical Data]  
 KW - Humans  
 KW - Infant  
 KW - Newborn  
 KW - Near Drowning/ep [Epidemiology]  
 KW - Poisoning/ep [Epidemiology]  
 KW - Poisoning/mo [Mortality]  
 KW - Wounds and Injuries/ep [Epidemiology]  
 KW - Wounds and Injuries/mo [Mortality]  
 KW - Medline  
 KW - Unsupervised Play Addition  
 RP - NOT IN FILE  
 SP - e683  
 EP - e692  
 JA - Pediatrics  
 VL - 111  
 IS - 6 Pt 1  
 CY - United States

**N2 - OBJECTIVE:** Mortality and morbidity data on childhood injury are used to construct developmentally appropriate intervention strategies and to guide pediatric anticipatory counseling on injury prevention topics. Effective anticipatory guidance depends on detailed injury data showing how risks change as children develop. Conventional age groupings may be too broad to show the relationship between children's development and their risk of various causes of injury. Previous studies revealed differences in overall rates and specific causes of injury by year of age. However, single year of age rates for children younger than 4 years may not reflect the variations in risk as a result of rapid developmental changes. This study was designed to analyze injury rates for children younger than 4 years by quarter-year intervals to determine more specifically the age period of highest risk for injury and for specific causes. **METHODS:** We used data from 1996-1998 California hospital discharges and death certificates to identify day of age and external cause of injury (E-code) for children younger than 4 years. The number of California residents for each day of age was estimated from US Census of estimates of California's population by year of age for the midpoints (1996-1998). Rates were calculated by 3-month intervals. We grouped the E-codes into major categories that would be particularly relevant for developmentally related risks of injury specific to young children. The categorization took into account physical, motor, behavioral, and cognitive developmental milestones of children 0 to 3 years. **RESULTS:** There were a total of 23,173 injuries; 636 resulted in death. The overall annual rate for children aged 0 to 3 years was 371/100,000. Beginning at age 3 to 5 months, the overall rate of injury rapidly increased with increased age, peaking at 15 to 17 months. The mean injury rate calculated for each single year of age did not reflect the variation and the highest rate of injury by quarter year of age for children younger than 1 year, 1 year, and 2 years. The leading major causes of injury in descending order were falls, poisoning, transportation, foreign body, and fires/burns. The overall rate of the major category of falls exceeded poisoning, the second leading cause of injury, by a factor of 2. Age-related differences were detected within each major cause of injury. For children 0 to 12 months of age, there was a different leading cause of specific injury for each 3-month period: other falls from height (0-2 months), battering (3-5 months), falls from furniture (6-8 months), and nonairway foreign body (9-11 months). Hot liquid and vapor injuries were the leading specific causes for children 12 to 17 months.

Poisoning by medication was the leading specific cause of injury for all age groups from 18 to 35 months and exceeded poisoning by other substances. Pedestrian injury was the leading specific cause of injury for all age groups from 36 to 47 months. Fall from furniture has the highest rates of specific causes of falls from age 3 to 47 months. Fall from stairs peaked at age 6 to 8 months and 9 to 11 months. Fall from buildings was highest at 24 to 26 months. Poisoning by medication peaked at age 21 to 23 months, but poisoning by other substances peaked at 15 to 17 months. The motor vehicle occupant injury rates were fairly stable over the age span of this study. The pedestrian injury rate increased beginning at age 12 to 14 months and by 15 to 17 months was double that of the motor vehicle occupant. Foreign body had a marked peak at age 9 to 11 months. Both battering and neglect rates were highest among infants 0 to 2 and 3 to 5 months. Bathtub submersions had a narrow peak at age 6 to 11 months. Other submersions peaked at 12 to 14 months and remained high until 33 to 35 months.

**CONCLUSIONS:** We departed from usual groupings of E-codes and devised groupings that would be reflective of age-related developmental characteristics. Differences in rates by narrow age groups for young children can be related to developmental achievements, w can be related to developmental achievements, which place the child at risk for specific causes of injury. We found marked variability in both rates and leading causes of injury by 3-month interval age groupings that were masked by year of age analyses. Children aged 15 to 17 months had the highest overall injury rate before age 15 years. This coincides with developmental achievements such as independent mobility, exploratory behavior, and hand-to-mouth activity. The child is able to access hazards but has not yet developed cognitive hazard awareness and avoidance skills. A remarkable finding was the high rate of battering injury among infants 0 to 5 months, suggesting the need to address potential child maltreatment in the perinatal period. Poisoning was the second major leading cause of injury; more than two thirds were medication. Cultural factors may influence views of medications, storage practices, use of poison control system telephone advice, and risk of toddler poisoning. The pedestrian injury rate doubled between 12 and 14 months and 15 and 17 months and exceeded motor vehicle occupant injury rates for each 3-month interval from 15 to 47 months. Pedestrian injury has not received sufficient attention in general and certainly not in injury prevention counseling for children younger than 4 years. Anticipatory guidance for pedestrian injury should be incorporated before 1 year of age. Effective strategies must be based on the epidemiology of childhood injury. Pediatricians and other pediatric health care providers are in a unique position to render injury prevention services to their patients. Integrating injury prevention messages in the context of developmental assessments of the child is 1 strategy. These data can also be used for complementary childhood injury prevention strategies such as early intervention programs for high-risk families for child abuse and neglect, media and advocacy campaigns, public policies, and environmental and product design

SN - 1098-4275

AD - University of California, Center for Health Policy and Research, Pediatric Injury Prevention Research Group, Irvine, California 92697-5800, USA. pagran@uci.edu

UR - 12777586

ER -

TY - JOUR

ID - 1607

T1 - Factors of significance for mobility in children with myelomeningocele

A1 - Norrlin,S.

A1 - Strinnholm,M.

A1 - Carlsson,M.

A1 - Dahl,M.

Y1 - 2003///

N1 - Norrlin, S. Strinnholm, M. Carlsson, M. Dahl, M

Acta paediatrica (Oslo, Norway : 1992)

bgc, 9205968

IM

Journal Article. Research Support, Non-U.S. Gov't

English

KW - Activities of Daily Living

KW - Caregivers

KW - Child

KW - Cognition Disorders/et [Etiology]

KW - Cognition Disorders/pp [Physiopathology]

KW - Cognition Disorders/rh [Rehabilitation]

KW - Female

KW - Hand/pp [Physiopathology]

KW - Hand Strength/ph [Physiology]

KW - Humans

KW - Locomotion/ph [Physiology]

KW - Male

KW - Meningomyelocele/co [Complications]

KW - Meningomyelocele/pp [Physiopathology]

KW - Meningomyelocele/rh [Rehabilitation]

KW - Nervous System Diseases/et [Etiology]

KW - Nervous System Diseases/pp [Physiopathology]

KW - Nervous System Diseases/rh [Rehabilitation]

KW - Self-Help Devices

KW - Severity of Illness Index

KW - Medline

KW - Unsupervised Play Addition

RP - NOT IN FILE

SP - 204

EP - 210

JF - Acta Paediatrica

JA - Acta Paediatr

VL - 92

IS - 2

CY - Norway

N2 - AIM: To investigate neurological impairment, hand function and cognitive function in a group of children with myelomeningocele, in order to identify factors of significance for independent mobility and the physical assistance required for mobility in daily activities. METHODS: The study material comprised 32 children, aged 6-11 y and without mental retardation. Mobility was assessed with the Pediatric Evaluation of Disability Inventory, scored as caregiver assistance. Statistical differences and correlations between the caregiver assistance scores and the selected variables were analysed. RESULTS: Nine children scored independent mobility. The independent children had better hand coordination ( $p = 0.004$ ) and walking ability ( $p = 0.01$ ), lower cele levels ( $p = 0.011$ ), higher performance IQ ( $p = 0.027$ ), better visuospatial function ( $p = 0.029$ ) and executive function ( $p = 0.037$ ) than the others. The caregiver assistance scores were lower for both the children with early and severe symptoms of brainstem dysfunction and the children with scoliosis. Statistically significant correlations were found between the need for caregiver assistance and reduced walking ability, high cele level, poor hand strength and coordination, visuospatial function, executive function and performance IQ. In the subgroup of children who needed a wheelchair or walking aids, hand strength was the only variable significantly correlated with caregiver assistance ( $r(s) = 0.703$ ,  $p = 0.000$ ). CONCLUSION: Most of the children were dependent on others in daily activities. Impaired hand function and cognitive function were significant for mobility, and this has implications for the therapy programme in children with myelomeningocele

SN - 0803-5253

AD - Folke Bernadottehemmet, Children's Hospital, Department of Women's and Children's Health, Section of Paediatrics, Uppsala University, Uppsala, Sweden. simone.norrlin@ped.uas.lul.se

UR - 12710647

ER -

TY - JOUR

ID - 1608

T1 - Lack of human herpesvirus 8 and Epstein-Barr virus in Kikuchi's histiocytic necrotizing lymphadenitis

A1 - George,T.I.

A1 - Jones,C.D.

A1 - Zehnder,J.L.

A1 - Warnke,R.A.

A1 - Dorfman,R.F.

Y1 - 2003/02//



N1 - George, Tracy I. Jones, Carol D. Zehnder, James L. Warnke, Roger A. Dorfman, Ronald F

Human pathology

gec, 9421547

IM

Case Reports. Journal Article

English

KW - Adolescent

KW - Adult

KW - Child

KW - DNA

KW - Viral/an [Analysis]

KW - Female

KW - Herpesvirus 4

KW - Human/ge [Genetics]

KW - Human

KW - Herpesvirus 8

KW - Histiocytic Necrotizing Lymphadenitis/vi [Virology]

KW - Humans

KW - In Situ Hybridization

KW - Male

KW - Polymerase Chain Reaction

KW - RNA

KW - Medline

KW - Unsupervised Play Addition

RP - NOT IN FILE

SP - 130

EP - 135

JF - Human Pathology

JA - Hum Pathol

VL - 34

IS - 2

CY - United States

N2 - Kikuchi's histiocytic necrotizing lymphadenitis is a self-limited disorder that typically involves the cervical lymph nodes of young women. Although a viral etiology has been postulated, a definitive viral agent has not been identified. Recent reports have suggested that human herpesvirus 8 (HHV 8) or Epstein-Barr virus (EBV) may play an etiologic role. We investigated the presence of HHV 8 and EBV in archival tissue from 34 cases of Kikuchi's histiocytic necrotizing lymphadenitis. We examined 29 cases for HHV 8 using a nested polymerase chain reaction (PCR) on paraffin-embedded or frozen tissue, and 24 cases for EBV RNA using in situ hybridization (ISH) for EBER1. Controls included reactive lymph nodes from 8 adult women presenting with cervical or axillary lymphadenopathy. The study patients included 7 men and 27 women with a mean age of 28 years. All patients were previously healthy without evidence of immunocompromise and presented with cervical, axillary, or inguinal lymphadenopathy. Two cases exhibited EBV RNA by ISH; this was confirmed by PCR for EBV DNA. HHV 8 DNA was not amplified by nested PCR in any of the cases of Kikuchi's histiocytic necrotizing lymphadenitis or reactive lymph nodes; control PCR demonstrated the presence of amplifiable DNA in all cases. These findings suggest that HHV 8 and EBV do not play causative roles in Kikuchi's histiocytic necrotizing lymphadenitis. Copyright 2003, Elsevier Science (USA). All rights reserved

SN - 0046-8177

AD - Department of Pathology, Stanford University Medical Center, CA 94305, USA

UR - 12612880

ER -

TY - JOUR

ID - 1609

T1 - Fatal unintentional traumatic asphyxia in childhood

A1 - Byard,R.W.

A1 - Hanson,K.A.

A1 - James,R.A.

Y1 - 2003/01//

N1 - Byard, R W. Hanson, K A. James, R A

Journal of paediatrics and child health

arp, 9005421

IM

Journal Article

English

KW - Accidents

KW - Adolescent

KW - Asphyxia/et [Etiology]

KW - Asphyxia/mo [Mortality]

KW - Child

KW - Preschool

KW - Female

KW - Humans

KW - Male

KW - Medical Audit

KW - South Australia/ep [Epidemiology]

KW - Wounds and Injuries/co [Complications]

KW - Medline

KW - Unsupervised Play Addition

RP - NOT IN FILE

SP - 31

EP - 32

JF - Journal of Paediatrics & Child Health

JA - J Paediatr Child Health

VL - 39

IS - 1

CY - Australia

N2 - OBJECTIVE: The present study was undertaken to examine specific features of unintentional traumatic asphyxial deaths in childhood. METHODS: Coronial files and records at the Forensic Science Centre in Adelaide, South Australia, were examined over a 35-year period from 1966 to 2000 for all cases of traumatic asphyxial death occurring in children under the age of 17 years. RESULTS: Six cases of unintentional fatal traumatic asphyxia were identified. All of the victims were boys with an age range of 2-15 years (mean 6.8 years) and all were found dead at the scene. Fatal traumatic asphyxia resulted from entrapment beneath a chest of drawers, beneath a table tennis table, between a pile of wooden pallets and a metal fence, between a conveyor belt and its frame, and under a motor vehicle (in two cases). CONCLUSIONS: Fatal traumatic asphyxia in childhood is a rare event, with younger children commonly being trapped by furniture or by industrial equipment while playing, and older children being trapped under motor vehicles in similar circumstances to adult traumatic asphyxial deaths. Unsupervised play of young children around heavy and potentially unstable pieces of furniture may be dangerous, particularly if more than one child is present. Unsupervised play of young children in industrial yards should be avoided

SN - 1034-4810

AD - Forensic Science Centre, Adelaide, South Australia, Australia. byard.roger@saugov.sa.gov.au

UR - 12542809

ER -

TY - JOUR

ID - 1610

T1 - Penetrating needle injury of the eye causing cataract in children

A1 - Rabiah,P.K.

Y1 - 2003/01//

N1 - Rabiah, Peter K

Ophthalmology

oi5, 7802443

IM

Journal Article

English

KW - Adolescent

KW - Cataract/et [Etiology]

KW - Child

KW - Preschool

KW - Endophthalmitis/et [Etiology]

KW - Eye Injuries

KW - Penetrating/co [Complications]

KW - Female

KW - Humans

KW - Infant

KW - Lens

KW - Crystalline/in [Injuries]

KW - Male

KW - Needlestick Injuries/co [Complications]

KW - Retrospective Studies

KW - Visual Acuity

KW - Medline

KW - Unsupervised Play Addition

RP - NOT IN FILE

SP - 173

EP - 176

JF - Ophthalmology

VL - 110

IS - 1

CY - United States

N2 - PURPOSE: To review the presentation, management, and outcome of children with cataract caused by ocular needle penetration. DESIGN: Retrospective, noncomparative interventional case series.

PARTICIPANTS: Forty-two children with cataract caused by ocular needle penetration. INTERVENTION: Cataract surgery. MAIN OUTCOME MEASURES: Best-corrected postoperative visual acuity. RESULTS:

Injuries were unintentional and occurred during unsupervised play. The type of needle involved was hypodermic in 24 cases, sewing in 7, and undetermined in 11. Endophthalmitis developed in 14 cases and retinal detachment in 6. Endophthalmitis occurred in 12 cases (50%) of hypodermic needle injury but in no case of sewing needle injury. With a mean postoperative follow-up of 2.3 years, the best-corrected visual acuity was 20/40 or better in 19 cases, 20/50 to 20/80 in 7, 20/100 to counting fingers in 6, light perception in 1, no light perception in 6, and undetermined in 3. Eyes with endophthalmitis and/or retinal detachment had a worse visual prognosis. CONCLUSIONS: Ocular penetration causing cataract occurred in children during unsupervised play with inadequately stored or disposed of hypodermic or sewing needles. Endophthalmitis occurred frequently in injuries caused by hypodermic needles but not in those caused by sewing needles. Visual outcome after management was good in approximately half of the cases especially if endophthalmitis or retinal detachment did not develop

SN - 0161-6420

AD - Department of Ophthalmology, King Khaled Eye Specialist Hospital, Riyadh, Saudi Arabia

UR - 12511363

ER -

TY - JOUR

ID - 1611

T1 - Self in context: autonomy and relatedness in Japanese and U.S. mother-preschooler dyads

A1 - Dennis,T.A.

A1 - Cole,P.M.

A1 - Zahn-Waxler,C.

A1 - Mizuta,I.

Y1 - 2002/11//

N1 - Dennis, Tracy A. Cole, Pamela M. Zahn-Waxler, Carolyn. Mizuta, Ichiro

Child development

0372725, d28

IM

Comparative Study. Journal Article

English

KW - Adult

KW - Attention

KW - Child

KW - Preschool

KW - Cross-Cultural Comparison

KW - Culture

KW - Ego

KW - Female

KW - Humans

KW - Male

KW - Mother-Child Relations

KW - Personal Autonomy

KW - Play and Playthings

KW - Socioeconomic Factors

KW - Videotape Recording

KW - Medline

KW - Unsupervised Play Addition

RP - NOT IN FILE

SP - 1803

EP - 1817

JF - Child Development

JA - Child Dev.

VL - 73

IS - 6

CY - United States

N2 - Cultural differences and similarities in socialization during two contrasting laboratory tasks were examined in 30 Japanese mothers and their preschoolers, both temporarily residing in the United States, and 30 U.S. mothers and their preschoolers (age:  $M = 55.8$  months,  $SD = 4.9$ ). Mother and child actions, speech, emotion, and attention were coded from videotaped observations during a free play task and waiting task. Cross-cultural comparisons showed that U.S. mothers had more conversations that emphasized individual experiences, more often acted as playmates and used joint attention, maintained more physical distance, showed more positive emotions, and made more positive responses to child accomplishment. In contrast, Japanese mothers had more conversations that emphasized shared experiences, showed more divided attention, and maintained social role distinctions. Similar, but fewer cultural differences emerged for children. However, maternal and child characteristics also varied by task context. The results suggested an emphasis on autonomy in U.S. dyads and an emphasis on relatedness in Japanese dyads, but the interactions with task context revealed the coexistence of autonomy and relatedness

SN - 0009-3920

AD - New York University School of Medicine, Child Study Center, NY 10016, USA. dennit01@med.nyu.edu

UR - 12487495

ER -

TY - JOUR

ID - 1613

T1 - Car window entrapment and accidental childhood asphyxia

A1 - Byard, R.W.

A1 - James, R.A.

Y1 - 2001/04//

N1 - Byard, R W. James, R A

Journal of paediatrics and child health

arp, 9005421

IM

Case Reports. Journal Article

English

KW - Accidents

KW - Asphyxia

KW - Automobiles

KW - Child

KW - Preschool

KW - Equipment Safety

KW - Fatal Outcome

KW - Humans

KW - Male

KW - Neck Injuries

KW - South Australia

KW - Medline

KW - Unsupervised Play Addition

RP - NOT IN FILE

SP - 201

EP - 202

JF - Journal of Paediatrics & Child Health

JA - J Paediatr Child Health

VL - 37

IS - 2

CY - Australia

N2 - A 3-year-old boy was found hanging from a partly opened car window. Attempted resuscitation was unsuccessful. Postmortem reconstruction of events leading up to death indicated that the boy had slipped while standing on his tricycle and entrapped his head as he was attempting either to look into the car, or to climb in through the window. While it is not always possible to completely secure childhood environments, open cars should not be regarded as safe places for young children to play in or around when an adult is not in attendance. To minimize the chance of injury or death to children from parked cars, young children should be removed from vehicles and all windows and doors securely closed and locked, if they are to be left in the vicinity of the car to play unsupervised

SN - 1034-4810

AD - Forensic Science Centre, Adelaide, South Australia, Australia. byardr01@forensic.sa.gov.au

UR - 11328481

ER -

TY - JOUR

ID - 1614

T1 - A multivariate analysis of the revised Conners' Teacher Rating Scale with low-income, urban preschool children

A1 - Fantuzzo, J.

A1 - Grim, S.

A1 - Mordell, M.

A1 - McDermott, P.

A1 - Miller, L.

A1 - Coolahan, K.

Y1 - 2001/04//

N1 - Fantuzzo, J. Grim, S. Mordell, M. McDermott, P. Miller, L. Coolahan, K

Journal of abnormal child psychology

0364547, h33

IM

Journal Article. Research Support, U.S. Gov't, P.H.S.

English

KW - African Americans/px [Psychology]

KW - Attention Deficit Disorder with Hyperactivity/di [Diagnosis]  
KW - Attention Deficit Disorder with Hyperactivity/px [Psychology]  
KW - Child Behavior Disorders/di [Diagnosis]  
KW - Child Behavior Disorders/px [Psychology]  
KW - Child  
KW - Preschool  
KW - Early Intervention (Education)  
KW - Female  
KW - Humans  
KW - Male  
KW - Personality Assessment/sn [Statistics & Numerical Data]  
KW - Poverty/px [Psychology]  
KW - Psychometrics  
KW - Reproducibility of Results  
KW - Social Behavior  
KW - Urban Population  
KW - Medline  
KW - Unsupervised Play Addition  
RP - NOT IN FILE  
SP - 141  
EP - 152  
JF - Journal of Abnormal Child Psychology  
JA - J Abnorm.Child Psychol.  
VL - 29  
IS - 2  
CY - United States  
N2 - The present investigation addressed the utility of the revised Conners' Teachers Rating Scale (CTRS-28) with low-income urban preschool children. CTRS-28 ratings for a large sample of preschool children from an urban Head Start program were analyzed using exploratory factor analysis. Analyses yielded a 3-factor structure: Conduct problems, Hyperactivity, and Passivity. Further analyses cross-validated this structure for males and females and supported its integrity. Multimethod, multisource validity analyses substantiated the CTRS-28 dimensions. The Play Disruption factor of the parent and teacher Penn Interactive Peer Play Scales (PIPPS) provided convergent validity for the Conduct and Hyperactivity factors of the CTRS-28, whereas the Play Interaction factor revealed divergent validity. The Play Disconnection factor of the PIPPS validated the CTRS-28 Passivity factor. The Q-Sort Emotional Regulation scale provided divergent validity for the Conduct and Hyperactivity factors and likewise the Q-Sort Autonomy scale provided divergent validity for the Passivity factor. Age and sex differences were assessed across the 3 factors of the derived preschool structure. A main effect was found for sex and age indicating that boys displayed higher levels of Hyperactivity and Passivity problems than girls did. Similarly, 4-year-old children demonstrated higher levels of Passivity problems than did 5-year-old children  
SN - 0091-0627  
AD - Graduate School of Education, University of Pennsylvania, Philadelphia 19104-6216, USA.  
johnf@gse.upenn.edu  
UR - 11321629  
ER -  
  
TY - JOUR  
ID - 1616  
T1 - Parental attitudes toward BB and pellet guns  
A1 - Damore,D.T.  
A1 - Ramundo,M.L.  
A1 - Hanna,J.P.  
A1 - Dayan,P.S.  
Y1 - 2000/05//  
N1 - Damore, D T. Ramundo, M L. Hanna, J P. Dayan, P S  
Clinical pediatrics

dhe, 0372606, 8407647

AIM, IM

Comparative Study. Journal Article

English

KW - Adolescent

KW - Adult

KW - Age Distribution

KW - Analysis of Variance

KW - Attitude to Health

KW - Chi-Square Distribution

KW - Child

KW - Preschool

KW - Female

KW - Humans

KW - Incidence

KW - Male

KW - New York City/ep [Epidemiology]

KW - Parent-Child Relations

KW - Play and Playthings

KW - Prospective Studies

KW - Questionnaires

KW - Risk Factors

KW - Sampling Studies

KW - Sex Distribution

KW - Statistics

KW - Nonparametric

KW - Urban Population

KW - Wounds

KW - Gunshot/ep [Epidemiology]

KW - Gunshot/et [Etiology]

KW - Medline

KW - Unsupervised Play Addition

RP - NOT IN FILE

SP - 281

EP - 284

JF - Clinical Pediatrics

JA - Clin.Pediatr (Phila)

VL - 39

IS - 5

CY - UNITED STATES

N2 - As well as describing our pediatric BB and pellet gun injuries and the circumstances surrounding these injuries, we also evaluated parental perceptions of the dangers of BB and pellet guns. A convenience sample of three groups of parents and their children presenting to a Midwest, urban, children's hospital emergency department was prospectively enrolled. The three groups of parents included the injured group, which consisted of the parents whose children had been injured by BB or pellet guns; the gun group, which consisted of the parents who allowed their children to possess BB or pellet guns but had not sustained injury from these guns; and the no gun group, which consisted of the parents who did not allow their children to have these guns. All parents completed a survey concerning their attitudes toward BB and pellet guns. Twenty-eight parents completed questionnaires in each of the three groups. Most BB and pellet gun injuries occurred in adolescent males at home without adult supervision and were inflicted by a friend or by themselves. The injured group and the no gun group viewed BB and pellet guns as significantly more dangerous than the gun group. Parents who allow their children to have BB or pellet guns appear to misperceive their potential for injury by allowing their children to use these guns in an unsafe manner. Clinicians must educate parents about the significant potential for injury of nonpowdered guns

SN - 0009-9228

AD - Children's Hospital Medical Center of Akron, Ohio, USA

UR - 10826075

ER -

TY - JOUR

ID - 1617

T1 - Monkeybar injuries: complications of play

A1 - Waltzman,M.L.

A1 - Shannon,M.

A1 - Bowen,A.P.

A1 - Bailey,M.C.

Y1 - 1999/05//

N1 - Waltzman, M L. Shannon, M. Bowen, A P. Bailey, M C

Pediatrics

oxv, 0376422

IM

Journal Article

English

KW - Age Distribution

KW - Age Factors

KW - Athletic Injuries/ep [Epidemiology]

KW - Child

KW - Preschool

KW - Craniocerebral Trauma/ep [Epidemiology]

KW - Data Collection

KW - Equipment Design

KW - Female

KW - Fractures

KW - Bone/ep [Epidemiology]

KW - Hospitalization/sn [Statistics &amp; Numerical Data]

KW - Humans

KW - Infant

KW - Male

KW - Massachusetts/ep [Epidemiology]

KW - Play and Playthings/in [Injuries]

KW - Retrospective Studies

KW - Medline

KW - Unsupervised Play Addition

RP - NOT IN FILE

SP - e58

JA - Pediatrics

VL - 103

IS - 5

CY - UNITED STATES

N2 - **BACKGROUND:** Playground equipment resulted in >200 000 injuries from 1990 to 1994, according to the Consumer Product Safety Commission; 88% were attributable to climbers (monkeybars/jungle gyms [MB/JGs]), swings, and slides. Equipment-specific injury requiring emergency department (ED) evaluation has not been reported previously. **OBJECTIVE:** To describe the spectrum of significant MB/JG-related injuries. **METHODS:** A 2-year retrospective chart review was performed using the computerized charting system at a large urban Children's Hospital/Regional Pediatric Trauma Center with 50 000 ED visits per year. A telephone survey also was conducted after the chart review to obtain additional information concerning the injury location, the surface type below the equipment, and the presence of adult supervision. **RESULTS:** A total of 204 patients were identified. Mean age was 6.2 years (range, 20 months to 12 years); 114 (56%) were male. A seasonal variation was noted with June to August accounting for 43% of visits. Injuries included fractures in 124 (61%), contusions in 20 (10%), neck and back strains in 17 (8%), lacerations in 16 (8%), closed head injuries in 10 (5%), abdominal trauma in 5 (3%), genitourinary injuries in 5 (3%), and miscellaneous injuries in the remainder. Among fractures, 90% were fractures of the upper extremity; 48 (40%) were supracondylar fractures. One child



sustained a C7 compression fracture. Abdominal injuries included 1 child who sustained a splenic laceration. All genitourinary injuries (2 vaginal hematomas, 1 vaginal contusion, 1 penile laceration, and 1 urethral injury) were from straddle-type injuries. Fifty-one (25%) patients were admitted to the hospital. Of these, 47 (92%) required an operative procedure (orthopedic reduction or vaginal examination under anesthesia). Analysis of the telephone data revealed that the surface did not influence the injury type. Of the 79 fractures, 30 occurred on "soft surfaces." Injury type was associated significantly with chronologic age. Younger children (1 to 4 years of age) sustained more long-bone fractures than did older children. The presence of adult (at least 18 years of age) supervision, did not influence the occurrence of fractures. CONCLUSIONS: These data suggest that 1) a significant proportion (25%) of MB/JG-related injuries that are evaluated in the ED require hospitalization; 2) most of the injuries resulting in admission will require operative intervention (92%); 3) the surface below the equipment has no influence on the type or severity of the injury; 4) younger children are more likely to sustain long-bone fractures than are older children; and 5) adult supervision does not influence the injury pattern. These data identify the need for additional investigation of means of making MB/JGs safer for child use

SN - 1098-4275

AD - Children's Hospital, Boston, Division of Emergency Medicine, Harvard Medical School, Boston MA 02115, USA. waltzmanvm@a1.tch.harvard.edu

UR - 10224202

ER -

TY - JOUR

ID - 1618

T1 - Perceived visual ability for independent mobility in persons with retinitis pigmentosa

A1 - Turano,K.A.

A1 - Geruschat,D.R.

A1 - Stahl,J.W.

A1 - Massof,R.W.

Y1 - 1999/04//

N1 - Turano, K A. Geruschat, D R. Stahl, J W. Massof, R W

Investigative ophthalmology & visual science

gwi, 7703701

IM

Journal Article. Research Support, U.S. Gov't, P.H.S.

English

KW - Activities of Daily Living

KW - Adolescent

KW - Adult

KW - Child

KW - Preschool

KW - Contrast Sensitivity/ph [Physiology]

KW - Humans

KW - Infant

KW - Middle Aged

KW - Questionnaires

KW - Regression Analysis

KW - Reproducibility of Results

KW - Retina/pp [Physiopathology]

KW - Retinitis Pigmentosa/pp [Physiopathology]

KW - Visual Acuity/ph [Physiology]

KW - Medline

KW - Unsupervised Play Addition

RP - NOT IN FILE

SP - 865

EP - 877

JF - Investigative Ophthalmology & Visual Science

JA - Invest Ophthalmol Vis Sci

VL - 40

IS - 5

CY - UNITED STATES

N2 - PURPOSE: To determine the distribution of perceived ability for independent mobility in people who are at various stages of retinitis pigmentosa (RP). METHODS: A questionnaire was developed to ask subjects to rate how difficult they found each of 35 mobility situations if they had no assistance. The scale was 1 (no difficulty) to 5 (extreme difficulty). In each of 127 subjects, the Rasch analysis, a latent trait analysis, was used to convert the ordinal difficulty ratings into interval measures of perceived visual ability for independent mobility. RESULTS: Content validity of the questionnaire was shown by good separation indexes (4.55 and 8.0) and high reliability scores (0.96 and 0.98) for the person and the item parameters. Construct validity was shown with model fit statistics. Criterion validity of the questionnaire was shown by good discrimination among mobility-related behavior such as "limit independent travel," "always ask for accompaniment," "use a mobility aid," and "have a fear of falling." The mobility situation shown to require the least visual ability was "moving about in the home"; the situation requiring the most was "walking at night." Bivariate regression analysis determined that for every decade of disease progression, perceived visual ability for mobility decreased by approximately 0.5 logit, which was slightly less than 10% of the total range in the study sample. A linear combination of the visual function measures, log minimum angle of resolution, log contrast sensitivity, and log retinal area accounted for 57% of the variability in the person measure. CONCLUSIONS: The patient-based assessment, developed to determine difficulty across a range of mobility situations, is a valid way to measure perceived ability for independent mobility. This latent trait varies systematically with the progression of RP and with visual function measures

SN - 0146-0404

AD - Wilmer Eye Institute, The Johns Hopkins University School of Medicine, Baltimore, MD, USA

UR - 10102283

ER -

TY - JOUR

ID - 1619

T1 - Living with dementia: communicating with an older person and her family

A1 - Long,A.

A1 - Slevin,E.

Y1 - 1999/01//

N1 - Long, A. Slevin, E

Nursing ethics

b6m, 9433357

E, N

Case Reports. Journal Article

English

KW - Adaptation

KW - Psychological

KW - Adult

KW - Adult Children

KW - Aged/px [Psychology]

KW - Beneficence

KW - Communication

KW - Dehumanization

KW - Dementia/nu [Nursing]

KW - Dementia/px [Psychology]

KW - Ethical Analysis

KW - Family/px [Psychology]

KW - Female

KW - Humans

KW - Male

KW - Middle Aged

KW - Nurse-Patient Relations

KW - Nursing Methodology Research

KW - Nursing Staff

KW - Hospital/px [Psychology]

KW - Nursing Theory

KW - Paternalism

KW - Personal Autonomy

KW - Professional-Family Relations

KW - Medline

KW - Unsupervised Play Addition

RP - NOT IN FILE

SP - 23

EP - 36

JF - Nursing Ethics

JA - Nurs Ethics

VL - 6

IS - 1

CY - ENGLAND

N2 - This article is designed to explore and examine the key components of communication that emerged during the interactional analysis of a role play that took place in the classroom. The 'actors' were nurses who perceived the interaction to reflect an everyday encounter in a hospital ward. Permission to tape the interaction was sought and given by all persons involved. The principal 'players' in the scenario were: the patient, a 70-year-old-woman who had been admitted with dementia, her son and daughter, and the nurse in charge of the ward. The fundamental dynamics of the use of power and restriction, truth telling, family stress, interpersonal conflict, ageism, sexism, empathy and humanism surfaced during the analysis. The findings show that therapeutic communication should be the foundation on which nursing should stand. The article continues with an exploration of the theoretical frameworks that guided the analysis of interaction and concludes by suggesting tentatively some meaningful implications for nursing practice. It plans to furnish provocative new insights into the sometimes covert communication dynamics occurring within the nurse-patient relationship. Finally, it aims to generate discussion on this little-charted realm of human social interaction

SN - 0969-7330

AD - University of Ulster, Newtonabbey, NI

UR - 10067554

ER -

TY - JOUR

ID - 1620

T1 - Cognitive predictors of young children's readiness for powered mobility

A1 - Tefft,D.

A1 - Guerette,P.

A1 - Furumasu,J.

Y1 - 1999/10//

N1 - Tefft, D. Guerette, P. Furumasu, J

Developmental medicine and child neurology

0006761, e83

IM

Journal Article. Research Support, U.S. Gov't, Non-P.H.S.. Research Support, U.S. Gov't, P.H.S.

English

KW - Child Development

KW - Child

KW - Preschool

KW - Cognition/cl [Classification]

KW - Disabled Children

KW - Female

KW - Humans

KW - Infant

KW - Male

KW - Motor Skills/cl [Classification]

KW - Patient Selection

KW - Prognosis  
 KW - Regression Analysis  
 KW - Wheelchairs  
 KW - Medline  
 KW - Unsupervised Play Addition  
 RP - NOT IN FILE  
 SP - 665  
 EP - 670  
 JF - Developmental Medicine & Child Neurology  
 JA - Dev.Med Child Neurol.  
 VL - 41  
 IS - 10  
 CY - ENGLAND

N2 - Independent mobility in early childhood has been associated with the development of various cognitive and psychosocial skills. However, children with physical disabilities are not always able to move independently and may be at risk for delays in these areas. Early provision of powered mobility can offer young children an opportunity for independent mobility. Despite this, there is little information to help determine when a young child has the cognitive skills necessary to operate a powered wheelchair safely. This current research aims to identify these skills. A cognitive assessment battery and a wheelchair mobility training and assessment program were developed. Twenty-six children with physical disabilities between the ages of 20 and 36 months were evaluated on the cognitive assessment and participated in the wheelchair training and assessment program. A stepwise regression analysis was used to determine which of the cognitive skills predicted wheelchair mobility performance. The cognitive domains of spatial relations and problem solving were found to be significant and accounted for 57% of the variance in wheelchair skills. Developmental cut-off points on these scales as they relate to wheelchair skills are presented and clinical applications are discussed

SN - 0012-1622

AD - Rehabilitation Engineering Research Center on Technology for Children with Orthopedic Disabilities, Rancho Los Amigos Medical Center, Downey, California, USA. donitatefft@ranchorep.org

UR - 10587042

ER -

TY - JOUR

ID - 1621

T1 - A playroom observation procedure to assess children with mental retardation and ADHD

A1 - Handen,B.L.

A1 - McAuliffe,S.

A1 - Janosky,J.

A1 - Feldman,H.

A1 - Breaux,A.M.

Y1 - 1998/08//

N1 - Handen, B L. McAuliffe, S. Janosky, J. Feldman, H. Breaux, A M

Journal of abnormal child psychology

0364547, h33

IM

Journal Article. Research Support, U.S. Gov't, P.H.S.

English

KW - Attention Deficit Disorder with Hyperactivity/cl [Classification]

KW - Attention Deficit Disorder with Hyperactivity/di [Diagnosis]

KW - Attention Deficit Disorder with Hyperactivity/px [Psychology]

KW - Attention Deficit and Disruptive Behavior Disorders/cl [Classification]

KW - Attention Deficit and Disruptive Behavior Disorders/di [Diagnosis]

KW - Attention Deficit and Disruptive Behavior Disorders/px [Psychology]

KW - Child

KW - Female

KW - Humans

KW - Intellectual Disability/cl [Classification]

KW - Intellectual Disability/di [Diagnosis]  
KW - Intellectual Disability/px [Psychology]  
KW - Intelligence  
KW - Male  
KW - Observer Variation  
KW - Personality Assessment/sn [Statistics & Numerical Data]  
KW - Personality Assessment  
KW - Play and Playthings  
KW - Psychometrics  
KW - Sensitivity and Specificity  
KW - Social Behavior  
KW - Social Environment  
KW - Medline  
KW - Unsupervised Play Addition

RP - NOT IN FILE

SP - 269

EP - 277

JF - Journal of Abnormal Child Psychology

JA - J Abnorm.Child Psychol.

VL - 26

IS - 4

CY - UNITED STATES

N2 - Forty-two children (ages 6 to 12 years old) with moderate mental retardation to borderline intellectual functioning were studied in a laboratory playroom setting to determine whether children identified as ADHD (attention deficit hyperactivity disorder) or controls differed on activity and attentional measures. Children with ADHD were further divided into ADHD + conduct problems (ADHD + CD) and ADHD-only subgroups (with an ADHD-combined group comprising children of both subgroups). An interval recording system was used to code observations of independent play and a restricted academic task. Results indicated that the ADHD-combined group was significantly more vocal and engaged in a significantly greater number of toy changes than controls during independent play. Significant group differences were also noted during the restricted academic task, with the ADHD-combined and ADHD + CD groups more off-task and engaging in a greater number of toy touches than controls. Discriminant analyses found independent play measures to predict group membership in 70 percent of cases (ADHD-combined vs. controls), but in only 64 percent of cases using measures from the restricted academic task. No significant findings resulted when the ADHD subjects were further divided into two subgroups. Despite some inconsistent findings, such laboratory-based observations may be of value in the diagnosis of ADHD in children with moderate mental retardation to borderline intellectual functioning

SN - 0091-0627

AD - University of Pittsburgh School of Medicine, Pennsylvania 15213, USA

UR - 9700519

ER -

TY - JOUR

ID - 1622

T1 - Golf clubs: hidden home hazard for children

A1 - Ridenour, M.V.

Y1 - 1998/06//

N1 - Ridenour, M V

Perceptual and motor skills

ozb, 0401131

IM

Journal Article

English

KW - Accidents

KW - Home/sn [Statistics & Numerical Data]

KW - Adolescent

KW - Adult

KW - Age Factors  
KW - Child  
KW - Preschool  
KW - Craniocerebral Trauma/ep [Epidemiology]  
KW - Craniocerebral Trauma/mo [Mortality]  
KW - Death Certificates  
KW - Golf/in [Injuries]  
KW - Golf  
KW - Humans  
KW - Play and Playthings/in [Injuries]  
KW - United States/ep [Epidemiology]  
KW - Medline  
KW - Unsupervised Play Addition  
RP - NOT IN FILE  
SP - 747  
EP - 753  
JA - Perceptual & Motor Skills  
VL - 86  
IS - 3 Pt 1  
CY - UNITED STATES

N2 - Different accident patterns for golf equipment were noted for adults and children. Children are more likely than adults to be hit by a golf club as bystanders who entered the swing zone of a golf club. Previous publications investigating accidents involving golf clubs and over 2000 incidents involving emergency room treatment of children injured by golf clubs were reviewed. Most injuries occurred when unsupervised children played with golf clubs at home. When studies limit their focus to accident victims, who are currently being treated in the emergency room, hospital, or outpatient facility, no deaths are reported. A separate analysis of death certificates of children between the ages of 4 and 14 years also identified death as a possible consequence as 19 deaths have been reported to the National Injury Information Clearinghouse. Based on these three sources of data, golf clubs should not be used by children unsupervised given the potential for serious and permanent head injury and death. Recommendations for parents and manufactures regarding the safety of golf clubs are provided

SN - 0031-5125  
AD - Biokinetics Research Laboratory, Temple University, Philadelphia, PA 19122, USA  
UR - 9656265  
ER -

TY - JOUR  
ID - 1624  
T1 - [The Dutch poliomyelitis epidemic 1992/'93; invalidity and rehabilitation]. [Dutch]  
A1 - van Asbeck,F.W.  
Y1 - 1996/06/01/  
N1 - van Asbeck, F W  
Nederlands tijdschrift voor geneeskunde  
nuk, 0400770

IM  
English Abstract. Journal Article. Research Support, Non-U.S. Gov't  
Dutch  
KW - Activities of Daily Living  
KW - Adolescent  
KW - Adult  
KW - Child  
KW - Preschool  
KW - Disability Evaluation  
KW - Disease Outbreaks  
KW - Female  
KW - Humans

KW - Infant  
 KW - Locomotion  
 KW - Male  
 KW - Muscle Contraction  
 KW - Netherlands/ep [Epidemiology]  
 KW - Poliomyelitis/ep [Epidemiology]  
 KW - Poliomyelitis/rh [Rehabilitation]  
 KW - Medline  
 KW - Unsupervised Play Addition  
 RP - NOT IN FILE  
 SP - 1178  
 EP - 1182  
 JF - Nederlands Tijdschrift voor Geneeskunde  
 JA - Ned Tijdschr Geneesk  
 VL - 140  
 IS - 22  
 CY - NETHERLANDS  
 N2 - OBJECTIVE: To describe epidemiologic characteristics and neurological and functional recovery of the victims of the 1992/'93 Dutch poliomyelitis epidemic compared to the 1971 and 1978 epidemics. DESIGN: Descriptive research. SETTING: Rehabilitation Centre 'De Hoogstraat', Utrecht, The Netherlands. METHODS: Two written questionnaires were sent out: one to the doctors attending the 71 registered patients five months after the end of the epidemic, the second 30 months after the end of the epidemic to the doctors of the patients with initial neurological impairments. Once every three months, muscular strength (MRC criteria), activities of daily life (ADL; using the Functional Independence Measure) and mobility (according to Hoffer) were assessed for 13 adult patients with moderately severe and severe disabilities. RESULTS: The questionnaire response was 100%. The median age increased from 5-9 years in 1971 to 10-14 years in 1978 to 20 years old in 1992/'93. Due to the 1992/'93 epidemic adults ( $>$  or  $=$  20 years) had more moderately severe and severe sequelae than people below 20 years of age ( $p < 0.001$ ). In the 1978 epidemic these differences were not significant. Muscular strength improved until 30 months after the onset of the disease although no improvement was seen in 10/13 patients after 18 months. The ability to cope independently with the ADL improved until 18 months; ten patients became almost independent. Mobility improved until 12 months. Three patients remained wheelchair bound, 1 became an exercise walker, 5 household walkers and 4 community walkers. CONCLUSION: Poliomyelitis is no longer a paediatric disease in the Netherlands. In future epidemics it should be borne in mind that most disablement probably will occur among adults. After an attack of acute poliomyelitis, muscular strength can continue to improve for up to two and a half years, while ADL usually remain stable after one and a half years and mobility after one year  
 SN - 0028-2162  
 AD - Revalidatiecentrum 'De Hoogstraat', Utrecht  
 UR - 8692353  
 ER -  
  
 TY - JOUR  
 ID - 1625  
 T1 - Whose life is it anyway? A study in respect for autonomy  
 A1 - Norden, M.  
 Y1 - 1995/06//  
 N1 - Norden, M  
 Journal of medical ethics  
 j1d, 7513619  
 E, IM  
 Journal Article  
 English  
 KW - Beneficence  
 KW - Drama  
 KW - Ethical Analysis  
 KW - Ethicists

KW - Ethics  
KW - Medical  
KW - Humans  
KW - Literature  
KW - Modern  
KW - Moral Obligations  
KW - Paternalism  
KW - Personal Autonomy  
KW - Quadriplegia/px [Psychology]  
KW - Resource Allocation  
KW - Right to Die  
KW - Value of Life  
KW - Medline  
KW - Unsupervised Play Addition  
RP - NOT IN FILE

SP - 179

EP - 183

JF - Journal of Medical Ethics

JA - J Med Ethics

VL - 21

IS - 3

CY - ENGLAND

N2 - Brian Clark's drama, *Whose Life Is It Anyway?*, explores the difficulties of applying the principle of respect for autonomy to real-life circumstances. In the play a permanently disabled patient, who wishes to be allowed to die, raises moral questions about the adequacy of the autonomous agent, respect for the autonomy of others, the authority of the law, the allocation of society's resources, and the intrinsic value of human life. After a brief review of the story and definition of respect for autonomy, this paper cites passages from the play that dramatize the tension between respect for autonomy and these other moral concerns. There follows a review of relevant commentary from the classicists Kant and Mill and the modernists Childress and Gillon. The study concludes that although classical and contemporary philosophers have clarified and elaborated upon the relationship between ethical principles, they have not provided definitive guidelines

SN - 0306-6800

AD - Marymount University, Arlington, Virginia, USA

UR - 7674285

ER -

TY - JOUR

ID - 1626

T1 - Maternal sensitivity in the second year: gender-based relations in the dyadic balance of control

A1 - Biringen,Z.

A1 - Robinson,J.L.

A1 - Emde,R.N.

Y1 - 1994/01//

N1 - Biringen, Z. Robinson, J L. Emde, R N

The American journal of orthopsychiatry

3r6, 0400640

IM

Journal Article

English

KW - Female

KW - Gender Identity

KW - Humans

KW - Infant

KW - Internal-External Control

KW - Language Development

KW - Male



KW - Maternal Behavior  
KW - Mother-Child Relations  
KW - Personality Development  
KW - Play and Playthings  
KW - Medline  
KW - Unsupervised Play Addition  
RP - NOT IN FILE  
SP - 78  
EP - 90  
JF - American Journal of Orthopsychiatry  
JA - Am J Orthopsychiatry  
VL - 64  
IS - 1

CY - UNITED STATES

N2 - In an investigation of gender-based differences in autonomy and relatedness in the mother-toddler dyad, gender-specific stylistic differences were found in mothers' sensitivity toward their toddlers. In the context of greater sensitivity, boys appeared to control the flow of interactions (initiation and maintenance) to a greater extent than did girls

SN - 0002-9432

AD - Department of Psychology, University of Colorado, Boulder

UR - 8147430

ER -

TY - JOUR

ID - 1627

T1 - Integrated study of 100 patients with Xp21 linked muscular dystrophy using clinical, genetic, immunochemical, and histopathological data. Part 3. Differential diagnosis and prognosis

A1 - Nicholson,L.V.

A1 - Johnson,M.A.

A1 - Bushby,K.M.

A1 - Gardner-Medwin,D.

A1 - Curtis,A.

A1 - Ginjaar,I.B.

A1 - den Dunnen,J.T.

A1 - Welch,J.L.

A1 - Butler,T.J.

A1 - Bakker,E.

Y1 - 1993/09//

N1 - Nicholson, L V. Johnson, M A. Bushby, K M. Gardner-Medwin, D. Curtis, A. Ginjaar, I B. den Dunnen, J T. Welch, J L. Butler, T J. Bakker, E. et al

Journal of medical genetics

j1f, 2985087r

IM

Journal Article. Research Support, Non-U.S. Gov't

English

KW - Adolescent

KW - Adult

KW - Aged

KW - Blotting

KW - Western

KW - Child

KW - Preschool

KW - Cohort Studies

KW - Creatine Kinase/bl [Blood]

KW - Diagnosis

KW - Differential

KW - Dystrophin/bi [Biosynthesis]  
KW - Dystrophin/ge [Genetics]  
KW - Female  
KW - Frameshift Mutation  
KW - Gene Deletion  
KW - Genetic Linkage  
KW - Genotype  
KW - Humans  
KW - Immunohistochemistry  
KW - Male  
KW - Middle Aged  
KW - Muscular Dystrophies/di [Diagnosis]  
KW - Muscular Dystrophies/ge [Genetics]  
KW - Muscular Dystrophies/me [Metabolism]  
KW - Muscular Dystrophies/pa [Pathology]  
KW - Phenotype  
KW - Prognosis  
KW - Severity of Illness Index  
KW - X Chromosome  
KW - Medline  
KW - Unsupervised Play Addition  
RP - NOT IN FILE  
SP - 745  
EP - 751  
JF - Journal of Medical Genetics  
JA - J Med Genet  
VL - 30  
IS - 9  
CY - ENGLAND

N2 - This report is the third part of a trilogy from a multidisciplinary study which was undertaken to investigate gene and protein expression in a large cohort of patients with well defined and diverse clinical phenotypes. The aim of part 3 was to review which of the analytical techniques that we had used would be the most useful for differential diagnosis, and which would provide the most accurate indication of disease severity. Careful clinical appraisal is very important and every DMD patient was correctly diagnosed on this basis. In contrast, half of the sporadic BMD patients and all of the sporadic female patients had received different tentative diagnoses based on clinical assessments alone. Sequential observations of quantitative parameters (such as the time taken to run a fixed distance) were found to be useful clinical indicators for prognosis. Intellectual problems might modify the impression of physical ability in patients presenting at a young age. Histopathological assessment was accurate for DMD but differentiation between BMD and other disorders was more difficult, as was the identification of manifesting carriers. Our data on a small number of women with symptoms of muscle disease indicate that abnormal patterns of dystrophin labelling on sections may be an effective way of differentiating between female patients with a form of limb girdle dystrophy and those carrying a defective Xp21 gene. Dystrophin gene analysis detects deletions/duplications in 50 to 90% of male patients and is the most effective non-invasive technique for diagnosis. Quantitative Western blotting, however, would differentiate between all Xp21 and non-Xp21 male patients. In this study we found a clear relationship between increased dystrophin abundance (determined by densitometric analysis of blots) and clinical condition, with a correlation between dystrophin abundance and the age at loss of independent mobility among boys with DMD and intermediate D/BMD. This indicates that blotting is the most sensitive and accurate technique for diagnosis and prognosis

SN - 0022-2593

AD - Muscular Dystrophy Group Research Laboratories, Newcastle General Hospital, Newcastle upon Tyne, UK

UR - 8411069

ER -

TY - JOUR

ID - 1628

T1 - Functional significance of dystrophin positive fibres in Duchenne muscular dystrophy

A1 - Nicholson,L.V.

A1 - Johnson,M.A.

A1 - Bushby,K.M.

A1 - Gardner-Medwin,D.

Y1 - 1993/05//

N1 - Nicholson, L V. Johnson, M A. Bushby, K M. Gardner-Medwin, D

Archives of disease in childhood

6xg, 0372434

AIM, IM

Journal Article. Research Support, Non-U.S. Gov't

English

KW - Adolescent

KW - Age Factors

KW - Blotting

KW - Western

KW - Child

KW - Dystrophin/me [Metabolism]

KW - Humans

KW - Male

KW - Muscles/me [Metabolism]

KW - Muscles/pp [Physiopathology]

KW - Muscular Dystrophies/me [Metabolism]

KW - Muscular Dystrophies/pp [Physiopathology]

KW - Medline

KW - Unsupervised Play Addition

RP - NOT IN FILE

SP - 632

EP - 636

JF - Archives of Disease in Childhood

JA - Arch.Dis.Child

VL - 68

IS - 5

CY - ENGLAND

N2 - The age when boys lose the ability to walk independently is one of the milestones in the progression of Duchenne muscular dystrophy (DMD). We have used this as a measure of disease severity in a group of 30 patients with DMD and six patients with intermediate Duchenne/Becker dystrophy (D/BMD). Dystrophin analysis was performed on tissue sections and western blots of muscle biopsy specimens from these patients and the relationships that were found between clinical severity and abundance of dystrophin labelling are reported. All patients with intermediate D/BMD had dystrophin labelling that was detected on sections and blots. Weak dystrophin labelling was found in sections from 21/30 DMD cases and on blots in 18/30 cases. Two non-exclusive patterns of dystrophin labelling were observed on sections: very clear labelling on a small percentage of fibres (usually < 1%) or very weak labelling on a much higher proportion (about 25%). The mean age at loss of mobility among the DMD patients with no dystrophin labelling on tissue sections was 7.9 years (range 6.3-9.5) while the mean age among those with some labelling was 9.9 years (range 8.0-11.9); this is a significant difference. Quantitative estimates of dystrophin abundance were obtained from densitometric analysis of dystrophin bands on blots. In the whole group of 36 patients, a significant positive relationship was found between the abundance of dystrophin and the age at loss of independent mobility. It is concluded that even the very low concentrations of dystrophin found in DMD patients may have some functional significance

SN - 1468-2044

AD - Muscular Dystrophy Group Research Laboratories, Newcastle General Hospital

UR - 8323331

ER -

TY - JOUR

ID - 1629

T1 - The relation of mothers' controlling vocalizations to children's intrinsic motivation

A1 - Deci,E.L.

A1 - Driver,R.E.

A1 - Hotchkiss,L.

A1 - Robbins,R.J.

A1 - Wilson,I.M.

Y1 - 1993/04//

N1 - Deci, E L. Driver, R E. Hotchkiss, L. Robbins, R J. Wilson, I M

Journal of experimental child psychology

2985128r, i2n

IM

Journal Article. Research Support, U.S. Gov't, P.H.S.

English

KW - Adult

KW - Child

KW - Child Behavior

KW - Communication

KW - Female

KW - Humans

KW - Male

KW - Mother-Child Relations

KW - Mothers

KW - Motivation

KW - Parenting

KW - Play and Playthings

KW - Verbal Behavior

KW - Medline

KW - Unsupervised Play Addition

RP - NOT IN FILE

SP - 151

EP - 162

JF - Journal of Experimental Child Psychology

JA - J Exp.Child Psychol.

VL - 55

IS - 2

CY - UNITED STATES

N2 - Twenty-six mother-child dyads played together in a laboratory setting. Play sessions were surreptitiously videotaped (with mothers' permission), and each maternal vocalization was transcribed and coded, first into 1 of 24 categories and then ipso facto into one of three supercategories--namely, controlling, autonomy supportive, and neutral. The degree of mothers' controllingness was calculated as the percentage of vocalizations coded as controlling. This index was correlated with the intrinsic motivation of their 6- or 7-year-old children, as assessed primarily by the free-choice behavioral measure and secondarily by a child self-report measure of interest and liking for the task. Both correlations were significantly negative, thereby suggesting that the robust laboratory findings of a negative relation between controlling contexts and individuals' intrinsic motivation are directly generalizable to the domain of parenting. Results are discussed in terms of the processes that undermine intrinsic motivation and the means through which parental controllingness is communicated

SN - 0022-0965

AD - Department of Psychology, University of Rochester, NY 14627

UR - 8501424

ER -

TY - JOUR

ID - 1630

T1 - Teaching children with autism appropriate play in unsupervised environments using a self-management treatment package

A1 - Stahmer,A.C.

A1 - Schreibman,L.  
Y1 - 1992///  
N1 - Stahmer, A C. Schreibman, L  
Journal of applied behavior analysis  
0174763, hdr  
IM  
Journal Article. Research Support, U.S. Gov't, P.H.S.  
English  
KW - Autistic Disorder/px [Psychology]  
KW - Autistic Disorder/th [Therapy]  
KW - Behavior Therapy/mt [Methods]  
KW - Child  
KW - Female  
KW - Follow-Up Studies  
KW - Generalization (Psychology)  
KW - Humans  
KW - Internal-External Control  
KW - Language Development Disorders/px [Psychology]  
KW - Language Development Disorders/th [Therapy]  
KW - Male  
KW - Play and Playthings  
KW - Self Stimulation  
KW - Social Environment  
KW - Stereotyped Behavior  
KW - Medline  
KW - Unsupervised Play Addition  
RP - NOT IN FILE  
SP - 447  
EP - 459  
JF - Journal of Applied Behavior Analysis  
JA - J Appl.Behav Anal.  
VL - 25  
IS - 2  
CY - UNITED STATES  
N2 - The present study used a self-management treatment package to teach 3 children with autism, who exhibited inappropriate play behaviors, to play appropriately in the absence of a treatment provider. After self-management training, generalization and maintenance of the behavior change were assessed. Because of the detrimental effects of self-stimulation (arm flapping, spinning toys, twirling, etc.) on learning, the relationship between self-stimulatory behaviors and appropriate play was measured. Results indicated that the children learned to exhibit appropriate play skills in unsupervised settings, appropriate play skills generalized to new settings, and 2 of the children maintained their gains at 1-month follow-up. In addition, self-stimulatory behaviors decreased as appropriate play increased. Treatment implications of these findings are discussed  
SN - 0021-8855  
AD - University of California, San Diego 92093  
UR - 1634432  
ER -  
  
TY - JOUR  
ID - 1631  
T1 - A regional survey of technical aids used by handicapped children in day care and at school  
A1 - Korpela,R.A.  
A1 - Koivikko,M.J.  
Y1 - 1992/01//  
N1 - Korpela, R A. Koivikko, M J  
Disability and rehabilitation  
9207179, a8i

IM

Journal Article

English

KW - Adolescent

KW - Child

KW - Child Day Care Centers

KW - Preschool

KW - Disabled Persons

KW - Female

KW - Finland

KW - Humans

KW - Infant

KW - Intellectual Disability/rh [Rehabilitation]

KW - Mainstreaming (Education)

KW - Male

KW - Orthopedic Equipment

KW - Rehabilitation/is [Instrumentation]

KW - Schools

KW - Self-Help Devices

KW - Medline

KW - Unsupervised Play Addition

RP - NOT IN FILE

SP - 16

EP - 22

JF - Disability & Rehabilitation

JA - Disabil Rehabil

VL - 14

IS - 1

CY - ENGLAND

N2 - Normalization, which underlines mainstreaming, is widely accepted in paediatric rehabilitation, but its success depends on the availability of special services, including proper technical aids for day care and school. This study aimed to evaluate the need for and use of technical aids in various forms of day care and education. Handicapped children used basic technical aids. In day care children needed more technical aids to promote independent mobility and playing, and in school they needed more computers and adaptations and software for these computers. The arrangement of technical aids for handicapped children requires good cooperation between the children's parents and various professionals

SN - 0963-8288

AD - Department of Paediatric Neurology, Tampere University Hospital, Finland

UR - 1534028

ER -

TY - JOUR

ID - 1632

T1 - Discipline. [Review] [17 refs]

A1 - Christophersen,E.R.

Y1 - 1992/06//

N1 - Christophersen, E R

Pediatric clinics of North America

oum, 0401126

AIM, IM

Journal Article. Research Support, U.S. Gov't, P.H.S.. Review

English

KW - Adaptation

KW - Psychological

KW - Adolescent

KW - Ambulatory Care/mt [Methods]

KW - Child  
KW - Child Behavior  
KW - Child Rearing  
KW - Preschool  
KW - Communication  
KW - Humans  
KW - Learning  
KW - Parenting  
KW - Parents/px [Psychology]  
KW - Pediatrics/mt [Methods]  
KW - Play and Playthings  
KW - Social Values  
KW - Teaching  
KW - Medline  
KW - Unsupervised Play Addition

RP - NOT IN FILE

SP - 395

EP - 411

JF - Pediatric Clinics of North America

JA - Pediatr Clin.North Am

VL - 39

IS - 3

CY - UNITED STATES

N2 - Discipline is one topic that virtually every ambulatory care pediatrician is frequently asked about. Although there is a tendency to provide parents with short, glib answers to questions about discipline, the literature on time-in, self-quieting skills, and independent play skills has rarely been addressed in the pediatric literature. It is, rather, covered in the research literature--a literature that is not exactly easily accessed by the pediatrician. [References: 17]

SN - 0031-3955

AD - Behavioral Pediatrics Division, Children's Mercy Hospital, Kansas City, Missouri

UR - 1574351

ER -

TY - JOUR

ID - 1633

T1 - Rural Youth Disability Prevention Project Survey: results from 169 Iowa farm families

A1 - Hawk,C.

A1 - Gay,J.

A1 - Donham,K.J.

Y1 - 1991///

N1 - Hawk, C. Gay, J. Donham, K J

The Journal of rural health : official journal of the American Rural Health Association and the National Rural Health Care Association

jx4, 8508122

H

Journal Article. Research Support, Non-U.S. Gov't

English

KW - Accident Prevention

KW - Adolescent

KW - Adolescent Health Services/sn [Statistics & Numerical Data]

KW - Agriculture/sn [Statistics & Numerical Data]

KW - Child

KW - Evaluation Studies as Topic

KW - Family Health

KW - Health Knowledge

KW - Attitudes

KW - Practice  
 KW - Health Services Needs and Demand/sn [Statistics & Numerical Data]  
 KW - Humans  
 KW - Iowa/ep [Epidemiology]  
 KW - Pilot Projects  
 KW - Preventive Health Services/og [Organization & Administration]  
 KW - Questionnaires  
 KW - Safety  
 KW - Medline  
 KW - Unsupervised Play Addition  
 RP - NOT IN FILE  
 SP - 170  
 EP - 179  
 JF - Journal of Rural Health  
 JA - J Rural Health  
 VL - 7  
 IS - 2  
 CY - UNITED STATES

N2 - Agriculture is now the most hazardous occupation in the United States and it is the only one in which children not only comprise a significant part of the work force, but also live and play at the work site. Annually, 23,500 pediatric agricultural injuries are reported, with nearly 300 fatalities (Rivara, 1985). The Rural Youth Disability Prevention Project was designed to use innovative, community-oriented methods to address the unique problems of child safety in agriculture. Toward this end, a survey instrument was designed to gather data both to assist in program development and to serve as a pretest for the subsequent evaluation. Analysis of these data indicated several issues to target for intervention efforts. One is lack of supervision--more than 40 percent of children who operate equipment do so unsupervised. Approximately 30 percent of children more than 3 years old play alone in work areas, and 80 percent of these children play near machinery in operation. Another issue is operation of farm machinery by very young children--respondents' children began operating equipment at an average age of 12 years. Coupling this with the finding that the parents believe their children are not capable of operating equipment until age 15 exemplifies the most important issue, the disparity between parents' levels of safety knowledge and safety behavior. Using the survey data to increase local involvement, efforts are being directed toward facilitating an ongoing, community-sponsored intervention program to empower farm families to effect their own solutions

SN - 0890-765X  
 AD - College of Medicine, University of Iowa, Iowa City 52240  
 UR - 10116776  
 ER -

TY - JOUR  
 ID - 1634  
 T1 - [Surgery of juvenile chronic arthritis]. [French]  
 A1 - Touzet,P.  
 A1 - Prieur,A.M.  
 A1 - Merckx,J.  
 Y1 - 1991///  
 N1 - Touzet, P. Prieur, A M. Merckx, J  
 Pediatrie  
 a4b, 0401127  
 IM  
 English Abstract. Journal Article  
 French  
 KW - Adolescent  
 KW - Anesthesia  
 KW - General  
 KW - Arthritis/co [Complications]  
 KW - Arthritis/rh [Rehabilitation]



KW - Arthritis/su [Surgery]  
 KW - Biopsy/ae [Adverse Effects]  
 KW - Humans  
 KW - Joint Diseases/et [Etiology]  
 KW - Joint Diseases/th [Therapy]  
 KW - Postoperative Period  
 KW - Preoperative Care  
 KW - Spinal Diseases/et [Etiology]  
 KW - Spinal Diseases/th [Therapy]  
 KW - Synovial Membrane/su [Surgery]  
 KW - Medline  
 KW - Unsupervised Play Addition

RP - NOT IN FILE

SP - 173

EP - 187

JF - Pédiatrie

JA - Pédiatrie (Bucur)

VL - 46

IS - 2

CY - FRANCE

N2 - A number of surgical procedures can be proposed in juvenile chronic arthritis (JCA). These are particularly useful in two circumstances: 1), during the early stages of the disease, as local treatment for hyperplastic synovium (intra-articular injection or synovectomy) in order to avoid further articular destruction; 2) in the late stages of the disease with the aim of restoring function to as near normal as possible (osteotomy, arthrodesis, arthroplasty, tendon repair). However, in all circumstances, such surgery must be decided upon by a team consisting of paediatrician and orthopaedic surgeon. Procedures are often multiple and require careful preparation including psychological support, nutritional, medical and orthopaedic care. And should be followed by intensive and specific physiotherapy. When these conditions are fulfilled, the operative procedures may restore nearly normal joint function in severe forms of JCA, thus allowing children and adolescents to maintain good physical, intellectual and psychological development through independent mobility

SN - 0031-4021

AD - Unite fonctionnelle de rhumatologie pediatrique, CHU Necker-Enfants-Malades, Paris, France

UR - 1646434

ER -

TY - JOUR

ID - 1635

T1 - Fire hydrant play: injuries and their prevention

A1 - Joffe,M.

A1 - Torrey,S.B.

A1 - Baker,M.D.

Y1 - 1991/06//

N1 - Joffe, M. Torrey, S B. Baker, M D

Pediatrics

oxv, 0376422

AIM, IM

Journal Article

English

KW - Adolescent

KW - African Americans

KW - Child

KW - Preschool

KW - Emergencies

KW - Epidemiologic Methods

KW - Female

KW - Hispanic Americans

KW - Hot Temperature  
KW - Humans  
KW - Injury Severity Score  
KW - Male  
KW - Philadelphia  
KW - Play and Playthings  
KW - Poverty  
KW - Seasons  
KW - Urban Population  
KW - Wounds and Injuries/ep [Epidemiology]  
KW - Wounds and Injuries/eh [Ethnology]  
KW - Wounds and Injuries/et [Etiology]  
KW - Wounds and Injuries/pc [Prevention & Control]  
KW - Medline  
KW - Unsupervised Play Addition

RP - NOT IN FILE

SP - 900

EP - 903

JA - Pediatrics

VL - 87

IS - 6

CY - UNITED STATES

N2 - A total of 86 children treated for injuries that occurred while playing in water from fire hydrants are described. Patients were urban (100%), minority (97%) children with few alternative means for keeping cool. Injuries occurred on extremely hot summer days (mean maximum temperature 36.3 degrees C [97.5 degrees F]). Laceration of the foot on broken glass was the most common injury and was prevented by wearing footwear (P less than .001). Motor vehicles caused all serious injuries. Sprinkler attachments on the hydrants were associated with significantly fewer motor vehicle-related injuries (P less than .001) and water pressure-related injuries (P = .02). Adults were present at more than 90% of injury scenes, but had no effect on the safety of fire hydrant play. Public policy should be directed toward increasing the availability of alternative means for keeping cool, increasing the number of hydrants equipped with sprinklers, and reducing the amount of broken glass in the streets. Public education targeting adults to remove glass from the street, insist that children wear footwear, and open only those hydrants that have sprinklers could further reduce injuries to urban children who play in water from fire hydrants

SN - 0031-4005

AD - Sections of Emergency Medicine, St Christopher's Hospital for Children, Temple University School of Medicine, Philadelphia, PA 19134-1095

UR - 2034497

ER -

TY - JOUR

ID - 1636

T1 - Causes of fatal childhood accidents involving head injury in northern region, 1979-86

A1 - Sharples,P.M.

A1 - Storey,A.

A1 - Aynsley-Green,A.

A1 - Eyre,J.A.

Y1 - 1990/11/24/

N1 - Sharples, P M. Storey, A. Aynsley-Green, A. Eyre, J A

BMJ (Clinical research ed.)

8900488, bmj, 101090866

AIM, IM

Journal Article. Research Support, Non-U.S. Gov't

English

KW - Accidental Falls

KW - Accidents

KW - Traffic  
KW - Adolescent  
KW - Child  
KW - Child Behavior  
KW - Preschool  
KW - Craniocerebral Trauma/et [Etiology]  
KW - Craniocerebral Trauma/mo [Mortality]  
KW - England/ep [Epidemiology]  
KW - Humans  
KW - Infant  
KW - Play and Playthings  
KW - Poverty Areas  
KW - Retrospective Studies  
KW - Trauma Severity Indices  
KW - Medline  
KW - Unsupervised Play Addition  
RP - NOT IN FILE  
SP - 1193  
EP - 1197  
JF - BMJ  
VL - 301  
IS - 6762  
CY - ENGLAND

**N2 - OBJECTIVE:** To examine the causes and circumstances surrounding fatal accidents involving head injuries in children in the Northern region. **DESIGN:** Retrospective review of the hospital case notes, necropsy reports, and records of the coroners' inquests. **SETTING:** Northern Regional Health Authority. **PATIENTS:** All 255 children aged less than 16 years who died with a head injury during 1979-86. **MAIN OUTCOME MEASURES:** Cause of injury and circumstances of accident according to reports of inquests; injury severity score; number of fatal accidents and mortality per 100,000 children in 10 groups of local authority wards ranked according to their score on the overall deprivation index; and distance of site of accident from child's home. **RESULTS:** Of the 255 children who died after a head injury, 136 (53%) children were playing at the time of the accident. 195 (76%) children sustained the head injury in road traffic accidents, 135 as pedestrians, 35 as cyclists, and 25 as passengers in a vehicle. In 120 accidents in child pedestrians the primary cause of accident was the unsafe behaviour of the child. 172 (67%) accidents occurred within one to two km of the child's home and 153 (63%) between 3 pm and 9 pm. The mortality was significantly related to social deprivation; excluding eight children injured while on holiday in the region, 15-fold decrease in mortality was recorded between the local authority wards that ranked highest on the overall deprivation index and those that ranked lowest (14.0/100,000 children, group 10 v 0.9/100,000, group 1 respectively, p less than 0.00001). **CONCLUSIONS:** The finding that most accidents occurred in children living in deprived areas who were playing unsupervised near their home suggests that childhood mortality might be appreciably reduced if children at play were protected from traffic, particularly in socially deprived areas

SN - 0959-8138  
AD - Department of Child Health, University of Newcastle upon Tyne  
UR - 2261557  
ER -

TY - JOUR  
ID - 1637  
T1 - From acting out to interactive play  
A1 - Willock,B.  
Y1 - 1990///  
N1 - Willock, B  
The International journal of psycho-analysis  
gsl, 2985179r  
IM

Journal Article

English

KW - Acting Out

KW - Aggression/px [Psychology]

KW - Antisocial Personality Disorder/px [Psychology]

KW - Child

KW - Child Behavior Disorders/px [Psychology]

KW - Ego

KW - Humans

KW - Object Attachment

KW - Personality Development

KW - Play Therapy/mt [Methods]

KW - Psychoanalytic Therapy/mt [Methods]

KW - Medline

KW - Unsupervised Play Addition

RP - NOT IN FILE

SP - 321

EP - 334

JF - International Journal of Psycho-Analysis

JA - Int.J Psychoanal.

VL - 71

IS - Pt 2

CY - ENGLAND

N2 - Many of the most problematic behaviours characteristic of severely disturbed, aggressive, conduct-disordered children can be understood in terms of developmental arrests and distortions which have occurred on a crucial, early developmental line related to the mastery of separation anxiety and the integration of autonomy. A clinical investigation of psychoanalytic treatment of hyperaggressive children demonstrates the utility of this conceptualization for understanding the nature of their profound ego defects as psychologically treatable, developmental distortions in the realm of object relations, self-structure and ego development. This mode of understanding enables one to specify the point in development where ego distortion occurred, comprehend the nature of the psychopathology, plan effective treatment and evaluate therapeutic progress

SN - 0020-7578

AD - C.M. Hincks Treatment Centre, Toronto, Ontario, Canada

UR - 2365551

ER -

TY - JOUR

ID - 1638

T1 - Disabled access to information technology--a portable adaptable, multipurpose device

A1 - Thornett,C.E.

A1 - Langner,M.C.

A1 - Brown,A.W.

Y1 - 1990/05//

N1 - Thornett, C E. Langner, M C. Brown, A W

Journal of biomedical engineering

k6k, 7906074

IM

Journal Article

English

KW - Activities of Daily Living

KW - Adolescent

KW - Child

KW - Communication Aids for Disabled

KW - Equipment Design

KW - Female

KW - Humans

KW - Male

KW - Microcomputers

KW - Quality of Life

KW - Self-Help Devices

KW - Software

KW - User-Computer Interface

KW - Medline

KW - Unsupervised Play Addition

RP - NOT IN FILE

SP - 205

EP - 208

JF - Journal of Biomedical Engineering

JA - J Biomed Eng

VL - 12

IS - 3

CY - ENGLAND

N2 - The technology exists to allow severely physically disabled people to have a far more independent lifestyle than many handicapped people enjoy today. To use an ever increasing range of sophisticated domestic equipment, without special modifications, an individually tailored control system and a universal accessing device are required. A portable multipurpose device allows multiply handicapped, non-speaking people a means of operating a variety of general-purpose or specialized pieces of electronic equipment at home and elsewhere, safely and independently. The device also provides a means of communication through the medium of computer-computer communication over telephone lines and will interface to a powered chair for independent mobility. Various features are provided which are not available from conventional environmental control systems. Through a specialized adjustable multipurpose switch system and a universal control device the handicapped person should be able to enjoy the independence afforded by the intelligent home of the future

SN - 0141-5425

AD - Chailey Heritage Hospital, Lewes, Sussex, UK

UR - 2140870

ER -

TY - JOUR

ID - 1639

T1 - Cognitive play of mentally retarded preschoolers: observations in the home and school

A1 - Malone,D.M.

A1 - Stoneman,Z.

Y1 - 1990/03//

N1 - Malone, D M. Stoneman, Z

American journal of mental retardation : AJMR

ame, 8800463

IM

Journal Article. Research Support, U.S. Gov't, Non-P.H.S.

English

KW - Cerebral Palsy/px [Psychology]

KW - Child

KW - Preschool

KW - Cognition Disorders/px [Psychology]

KW - Developmental Disabilities/px [Psychology]

KW - Down Syndrome/px [Psychology]

KW - Education of Intellectually Disabled

KW - Fragile X Syndrome/px [Psychology]

KW - Humans

KW - Intellectual Disability/px [Psychology]

KW - Play and Playthings

KW - Social Adjustment

KW - Social Environment

KW - Medline  
KW - Unsupervised Play Addition  
RP - NOT IN FILE  
SP - 475  
EP - 487  
JF - American Journal of Mental Retardation  
JA - Am J Ment.Retard.  
VL - 94  
IS - 5  
CY - UNITED STATES  
N2 - A within-subjects design was used to examine the cognitive play of 12 mainstreamed mentally retarded preschool boys during group free-play at school and in an independent play situation at home. Children played with available toys at school and with three designated toy sets at home. Cognitive and communicative abilities were established through administration of the Battelle Developmental Inventory. Children not only played more in the home condition, but this play was more sophisticated than that in the school condition. Increased differences between home and school performance were positively associated with expressive communicative developmental age. Peak play did not differ between the two settings. Children not only sequenced play activities more at home, but these sequences were longer and more complex than those at school  
SN - 0895-8017  
AD - Georgia University Affiliated Program, University of Georgia, Athens 30602  
UR - 1690555  
ER -  
  
TY - JOUR  
ID - 1640  
T1 - Interaction of normal children with anatomical dolls  
A1 - Sivan,A.B.  
A1 - Schor,D.P.  
A1 - Koepl,G.K.  
A1 - Noble,L.D.  
Y1 - 1988///  
N1 - Sivan, A B. Schor, D P. Koepl, G K. Noble, L D  
Child abuse & neglect  
can, 7801702  
IM  
Journal Article. Research Support, Non-U.S. Gov't  
English  
KW - Aggression/px [Psychology]  
KW - Attention  
KW - Child  
KW - Child Abuse  
KW - Sexual/px [Psychology]  
KW - Preschool  
KW - Female  
KW - Gender Identity  
KW - Humans  
KW - Male  
KW - Play and Playthings  
KW - Sexual Behavior  
KW - Social Environment  
KW - Medline  
KW - Unsupervised Play Addition  
RP - NOT IN FILE  
SP - 295  
EP - 304  
JF - Child Abuse & Neglect

JA - Child Abuse Negl.

VL - 12

IS - 3

CY - ENGLAND

N2 - Anatomical (sexually explicit) rag dolls are frequently used in interviews of children suspected of being sexually abused. Abused children have been noted clinically to be aggressive and sometimes sexually precocious in their doll play, and testimony to that effect is often accepted in the courtroom as pertinent evidence. However, to date, normative data on the play behaviors with the sexually explicit dolls have been unavailable. This pilot study provides empirical information on the play interaction of a relatively large number of normal (nonreferred) children with anatomical dolls. One hundred forty-four children (ages 3 to 8 years) were observed in a playroom containing these special dolls during three conditions: (1) with an adult present, (2) without an adult, and (3) with the dolls undressed. The observations showed that nonreferred children found these dolls no more interesting than other toys. Little aggression and no explicit sexual activity were observed. In contrast to clinical observation of abused children, the doll play of nonreferred children is unlikely to be characterized by aggression or sexual concerns; thus these behaviors when observed in interaction with these dolls should be taken seriously

SN - 0145-2134

AD - Department of Pediatrics, University of Iowa, Iowa City

UR - 3167619

ER -

TY - JOUR

ID - 1641

T1 - Powered mobility vehicles as aids in independent locomotion for young children. Suggestion from the field

A1 - Chiulli,C.

A1 - Corradi-Scalise,D.

A1 - Donatelli-Schultheiss,L.

Y1 - 1988/06//

N1 - Chiulli, C. Corradi-Scalise, D. Donatelli-Schultheiss, L

Physical therapy

0022623, p6w

AIM, IM

Case Reports. Journal Article

English

KW - Child

KW - Preschool

KW - Disabled Persons

KW - Female

KW - Humans

KW - Locomotion

KW - Male

KW - Motor Skills

KW - Quadriplegia/rh [Rehabilitation]

KW - Scoliosis/rh [Rehabilitation]

KW - Self-Help Devices

KW - Medline

KW - Unsupervised Play Addition

RP - NOT IN FILE

SP - 997

EP - 999

JF - Physical Therapy

JA - Phys Ther

VL - 68

IS - 6

CY - UNITED STATES

N2 - Both vehicles are good training devices for future mobility. The independent mobility provided by this equipment gave each child a boost of self-esteem and independence

SN - 0031-9023

AD - Department of Physical Therapy, United Cerebral Palsy Association of Nassau County, Inc., Rossevelt, NY 11575

UR - 2967503

ER -

TY - JOUR

ID - 1642

T1 - Play therapy in health care settings: promises never kept?. [Review] [27 refs]

A1 - Phillips,R.D.

Y1 - 1988///

N1 - Phillips, R D

Children's health care : journal of the Association for the Care of Children's Health  
czx, 8101257

H

Journal Article. Review

English

KW - Anxiety

KW - Child

KW - Child Care

KW - Hospitalized/px [Psychology]

KW - Preschool

KW - Communication

KW - Evaluation Studies as Topic

KW - Humans

KW - Internal-External Control

KW - Play Therapy

KW - Medline

KW - Unsupervised Play Addition

RP - NOT IN FILE

SP - 182

EP - 187

JF - Children's Health Care

JA - Child Health Care

VL - 16

IS - 3

CY - UNITED STATES

N2 - This article examines the variety of claims made about the effectiveness of play therapy in health care settings. The claims are organized into four categories of "promises": (a) mastery, autonomy, and control; (b) cooperation and communication; (c) coping with anxiety and fear; and (d) learning and information giving. The empirical questions within each promise are identified and relevant experimental research is discussed. The conclusion is that play therapy has not yet delivered on its promises in health care settings. [References: 27]

SN - 0273-9615

UR - 10302208

ER -

TY - JOUR

ID - 1643

T1 - Effects of powered mobility on self-initiated behaviors of very young children with locomotor disability

A1 - Butler,C.

Y1 - 1986/06//

N1 - Butler, C

Developmental medicine and child neurology

0006761, e83



IM

Case Reports. Journal Article. Research Support, Non-U.S. Gov't. Research Support, U.S. Gov't, Non-P.H.S..  
Research Support, U.S. Gov't, P.H.S.

English

KW - Child

KW - Preschool

KW - Communication

KW - Disabled Persons

KW - Exploratory Behavior

KW - Female

KW - Humans

KW - Infant

KW - Locomotion

KW - Male

KW - Wheelchairs

KW - Medline

KW - Unsupervised Play Addition

RP - NOT IN FILE

SP - 325

EP - 332

JF - Developmental Medicine & Child Neurology

JA - Dev.Med Child Neurol.

VL - 28

IS - 3

CY - ENGLAND

N2 - This study reports the effects of powered mobility on the self-initiated behavior of six children with various disabilities who, between 23 and 38 months of age, learnt to use motorized wheelchairs in less than three weeks. Using a multiple baseline design, two-hour observation periods were video-recorded at 10-day intervals before and after they achieved independent mobility. Frequency of self-initiated interaction with objects, spatial exploration and communication with care-giver were analyzed. Three children increased all three types of behavior; one increased in two types but decreased in interaction with objects; and two increased in spatial exploration only

SN - 0012-1622

UR - 2941328

ER -

TY - JOUR

ID - 1644

T1 - Correlates of mastery-related behavior: a short-term longitudinal study of infants in their second year

A1 - Frodi,A.

A1 - Bridges,L.

A1 - Grolnick,W.

Y1 - 1985/10//

N1 - Frodi, A. Bridges, L. Grolnick, W

Child development

0372725, d28

IM

Journal Article

English

KW - Affect

KW - Age Factors

KW - Child Behavior

KW - Child Rearing

KW - Female

KW - Humans

KW - Infant

KW - Longitudinal Studies  
KW - Male  
KW - Mother-Child Relations  
KW - Motivation  
KW - Object Attachment  
KW - Play and Playthings  
KW - Medline  
KW - Unsupervised Play Addition  
RP - NOT IN FILE  
SP - 1291  
EP - 1298  
JF - Child Development  
JA - Child Dev.  
VL - 56  
IS - 5  
CY - UNITED STATES  
N2 - The present study examined correlates of mastery-related behavior across the infant's second year of life. Maternal control style was quantified on a control to support-of-autonomy continuum, infant-mother attachment was assessed in the Strange Situation, and mastery-related behavior was observed in a toy play session at 12 and 20 months. Infants whose mothers were supportive of their autonomy displayed greater task-oriented persistence and competence during play than did infants of more controlling mothers; securely attached and avoidant infants tended to exhibit greater persistence at tasks than anxious-ambivalent babies, and ambivalent babies were the most negative in affect  
SN - 0009-3920  
UR - 4053744  
ER -

TY - JOUR  
ID - 1645  
T1 - Concerns of acutely ill, chronically ill, and healthy preschool children  
A1 - Ritchie,J.A.  
A1 - Caty,S.  
A1 - Ellerton,M.L.  
Y1 - 1984/12//  
N1 - Ritchie, J A. Caty, S. Ellerton, M L  
Research in nursing & health  
7806136, raq  
IM, N  
Comparative Study. Journal Article. Research Support, Non-U.S. Gov't  
English  
KW - Acute Disease/px [Psychology]  
KW - Child Behavior  
KW - Child Psychology  
KW - Child  
KW - Hospitalized/px [Psychology]  
KW - Preschool  
KW - Chronic Disease/px [Psychology]  
KW - Female  
KW - Humans  
KW - Interviews as Topic  
KW - Male  
KW - Play and Playthings  
KW - Sampling Studies  
KW - Medline  
KW - Unsupervised Play Addition  
RP - NOT IN FILE

SP - 265

EP - 274

JF - Research in Nursing &amp; Health

JA - Res.Nurs Health

VL - 7

IS - 4

CY - UNITED STATES

N2 - The study was designed to determine if the concerns of 2- to 5-year-old children hospitalized for chronic illness differ from the concerns of other children. Interviews were conducted with 32 short-stay chronically ill, 10 long-stay chronically ill, 20 acutely ill, and 20 healthy children. Narrative recordings were analyzed using a categorical system of 10 developmental and hospital-related concerns. Differences between groups in mean proportion of concerns expressed were examined for each interview using analysis of variance techniques. The major concerns expressed by each group on all interviews were Autonomy and Exploration and, in the chronically ill children, Intrusion. Increased age was associated with increased expression of Intrusion in all groups except the long-stay chronic illness group

SN - 0160-6891

UR - 6570056

ER -

TY - JOUR

ID - 1646

T1 - [Sample of high school students with a demonstration of intervening factors in school achievement and failure]. [French]

A1 - Piquilloud,C.

Y1 - 1984///

N1 - Piquilloud, C

Schweizer Archiv fur Neurologie, Neurochirurgie und Psychiatrie = Archives suisses de neurologie, neurochirurgie et de psychiatrie  
uds, 8709012

IM

English Abstract. Journal Article

French

KW - Achievement

KW - Adaptation

KW - Psychological

KW - Adolescent

KW - Defense Mechanisms

KW - Humans

KW - Intelligence

KW - Learning Disorders/px [Psychology]

KW - Personality Development

KW - Underachievement

KW - Medline

KW - Unsupervised Play Addition

RP - NOT IN FILE

SP - 251

EP - 262

JF - Schweizer Archiv fur Neurologie, Neurochirurgie und Psychiatrie

JA - Schweiz.Arch Neurol Neurochir Psychiatr

VL - 134

IS - 2

CY - SWITZERLAND

N2 - This research investigates the relationship and link between intellectual cathexis, school achievement and personality functioning in a representative sample of secondary school students aged 12 to 15 years. The level of structure of the personality plays a most significant role. Good school achievement does not necessarily depend on an optimal psychological equilibrium. In fact, the most determining factor seems to be the part played by the

defense mechanisms--particularly those which aim at controlling libidinal drives--developed and elaborated during the period of latency. A certain intellectual potential, however, is a necessary but not sufficient condition for school achievement - indeed, an end of school certificate i.e. the Swiss "certificat de maturite" could be obtained by students of average intelligence. The capacity of maintaining an active intellectual investment seems to be an equally determining factor. This quality of functioning contains an oedipal component - particularly the ability of taking one's stand and of competing - as well as a pre-oedipal one - the narcissistic integrity, allowing one to preserve one's self-esteem facing difficulties. Contrary to our hypothesis, the quality of subject-environment interaction with family, peers, teachers, plays a relatively minor role. A more important aspect concerns the effects and results of relations established during childhood such as the interiorization of parental expectations, the quality of the superego, the degree of internal autonomy allowing compromise with external demands, etc. Underlying conflicts can intervene at several levels. One of these levels could result in the subject's incapacity to utilize his own resources and these imply consequences ranging from difficulties in basic school achievement to non-acquisition of cognitive mechanisms and under-development of symbolization. Psychological testing is a means of identifying the underlying difficulties and determining their nature.

Remediating methods include psycho-pedagogical or psychotherapeutic intervention or, in some cases, both

SN - 0036-7273

UR - 6463609

ER -

TY - JOUR

ID - 1647

T1 - A specialized walking frame for children with cerebral palsy

A1 - Myles,J.W.

Y1 - 1983/11//

N1 - Myles, J W

Journal of pediatric orthopedics

hsw, 8109053

IM

Journal Article

English

KW - Cerebral Palsy/rh [Rehabilitation]

KW - Child

KW - Humans

KW - Orthopedic Equipment

KW - Walkers

KW - Medline

KW - Unsupervised Play Addition

RP - NOT IN FILE

SP - 620

EP - 621

JF - Journal of Pediatric Orthopedics

JA - J Pediatr Orthop

VL - 3

IS - 5

CY - UNITED STATES

N2 - To help severely physically handicapped children with cerebral palsy gain some independent mobility, a special walking frame of great stability has been evolved. It incorporates a variable-resistance roller and automatic reversing brake, and can be folded

SN - 0271-6798

UR - 6655062

ER -

TY - JOUR

ID - 1648

T1 - The effect of two body positions on head righting in severely disabled individuals with cerebral palsy

A1 - O'Brien,M.

A1 - Tsurumi,K.

Y1 - 1983/10//

N1 - O'Brien, M. Tsurumi, K

The American journal of occupational therapy : official publication of the American Occupational Therapy Association

7705978, 3o4

IM

Clinical Trial. Controlled Clinical Trial. Journal Article

English

KW - Adolescent

KW - Adult

KW - Cerebral Palsy/pp [Physiopathology]

KW - Child

KW - Female

KW - Head

KW - Humans

KW - Male

KW - Movement

KW - Posture

KW - Probability

KW - Regression Analysis

KW - Wheelchairs

KW - Medline

KW - Unsupervised Play Addition

RP - NOT IN FILE

SP - 673

EP - 680

JA - American Journal of Occupational Therapy

VL - 37

IS - 10

CY - UNITED STATES

N2 - This study examines the association between head righting and two commonly used therapeutic positions: semiprone on an inclined prone positioner and upright short-sitting in an adapted wheelchair. The subjects were 26 individuals with cerebral palsy and multiple handicaps who had difficulty maintaining active head control in a vertical orientation. Such head control is necessary for attending to learning tasks in the classroom and activities of daily living in the clinic. The frequency and duration of head righting during a feeding task was measured by means of a mercury switch system mounted on a headband and attached to an electromechanical digit counter and a clock. Measurements of duration and frequency beyond the predetermined range of functional head righting plus measurements on five control variables were analyzed by four statistical methods: t-test on the means, simple correlation, canonical correlation, and regression analysis. The control variables were age, mobility level, degree of hypertonicity, level of seizure activity, and level of reflex maturity. Results indicate that, in this severely handicapped population, head righting while in the adapted wheelchair is no different from head righting while in the semiprone position. One control variable, level of independent mobility, was positively correlated with the length of time that subjects were able to maintain head righting in the semiprone position

SN - 0272-9490

UR - 6638143

ER -

TY - JOUR

ID - 1649

T1 - Powered mobility for very young disabled children

A1 - Butler,C.

A1 - Okamoto,G.A.

A1 - McKay,T.M.

Y1 - 1983/08//

N1 - Butler, C. Okamoto, G A. McKay, T M  
Developmental medicine and child neurology  
0006761, e83

IM

Journal Article. Research Support, Non-U.S. Gov't. Research Support, U.S. Gov't, Non-P.H.S.. Research Support, U.S. Gov't, P.H.S.

English

KW - Child

KW - Preschool

KW - Disabled Persons

KW - Female

KW - Humans

KW - Infant

KW - Male

KW - Wheelchairs

KW - Medline

KW - Unsupervised Play Addition

RP - NOT IN FILE

SP - 472

EP - 474

JF - Developmental Medicine & Child Neurology

JA - Dev.Med Child Neurol.

VL - 25

IS - 4

CY - ENGLAND

N2 - Nine motor-disabled children with normal intelligence and varying degrees of disability were studied to see if competent control of a motorized wheelchair is attainable between 20 and 39 months of age. Each child used a conventional motorized wheelchair with adaptive seating. Parents supervised the learning at home. Eight children drove safely and independently within 1.7 to 12 hours accumulated over a one to seven week period. Parents reported that this independent mobility stimulated their child's social, emotional and intellectual behavior

SN - 0012-1622

UR - 6225687

ER -

TY - JOUR

ID - 1650

T1 - BB and pellet guns--toys or deadly weapons?

A1 - Harris, W.

A1 - Luterman, A.

A1 - Curreri, P. W.

Y1 - 1983/07//

N1 - Harris, W. Luterman, A. Curreri, P W

The Journal of trauma

kaf, 0376373

AIM, IM

Case Reports. Journal Article

English

KW - Abdominal Injuries/et [Etiology]

KW - Adolescent

KW - Child

KW - Preschool

KW - Humans

KW - Intestinal Perforation/et [Etiology]

KW - Liver/in [Injuries]

KW - Male

KW - Pancreas/in [Injuries]  
 KW - Play and Playthings  
 KW - Stomach/in [Injuries]  
 KW - Wounds  
 KW - Gunshot/co [Complications]  
 KW - Medline  
 KW - Unsupervised Play Addition  
 RP - NOT IN FILE  
 SP - 566  
 EP - 569  
 JF - Journal of Trauma-Injury Infection & Critical Care  
 JA - J Trauma  
 VL - 23  
 IS - 7  
 CY - UNITED STATES

N2 - BB and pellet weapons are not included in gun control laws and are often sold as children's toys. Injuries caused by these weapons have been considered trivial unless they involve vulnerable surface organs such as the eye. The purpose of this study was to review the management of six cases of pellet or BB gun injuries that required abdominal exploration at the University of South Alabama Medical Center from January 1980 through June 1982. Five of the six patients had significant internal injuries including perforations of the stomach, jejunum, liver, and pancreas. The ballistics of pneumatic weapons are reviewed. The muzzle velocities of many of these weapons necessitate that wounds caused by these weapons be handled with the same principles as for any small-caliber, low-velocity (less than 1,200 feet/second) weapons. Public education programs are urgently needed to educate parents as to the potential danger involved in purchasing these weapons for unsupervised use as toys by children

SN - 0022-5282  
 UR - 6876209  
 ER -

TY - JOUR  
 ID - 1651  
 T1 - Gaze and mutual gaze of preschool children in conversation  
 A1 - Krantz,M.  
 A1 - George,S.W.  
 A1 - Hursh,K.  
 Y1 - 1983/01//  
 N1 - Krantz, M. George, S W. Hursh, K  
 The Journal of psychology  
 jtz, 0376332

IM

Journal Article

English

KW - Attention  
 KW - Child Behavior  
 KW - Child  
 KW - Preschool  
 KW - Communication  
 KW - Female  
 KW - Fixation  
 KW - Ocular  
 KW - Humans  
 KW - Interpersonal Relations  
 KW - Male  
 KW - Play and Playthings  
 KW - Social Behavior  
 KW - Speech

KW - Medline  
KW - Unsupervised Play Addition  
RP - NOT IN FILE  
SP - 9  
EP - 15  
JF - Journal of Psychology  
JA - J Psychol  
VL - 113  
IS - 1st Half  
CY - UNITED STATES

N2 - The study was designed to describe the functional significance of gaze and mutual gaze in the context of the free-play conversation of preschool children. It was hypothesized that mutual gaze is not a fortuitous event in young children but a result of a gaze-action-gaze-reaction sequential process. Eleven high- and 11 low-friendship dyads were formed on the basis of the frequency of interaction in freeplay. Each dyad was videotaped for 15-minute play sessions. The videotapes were analyzed for the occurrence of gaze-related utterances and the occurrence of mutual gaze. When the speaker gazed at the listener the contingent probability of gaze response in the listener was 45% (as compared to a base rate of 3% gaze-related utterances). When the listener gazed at the speaker, the probability of gaze response was 38%. Gaze-related utterances were longer, more likely to result in a relevant response from the listener and less likely to result in nonresponse than utterances unaccompanied by gaze. Friendship between dyad members had no effect on any of the measures. It was concluded that gaze and mutual gaze are systematic components of the conversational behavior of preschool children

SN - 0022-3980  
UR - 6834291  
ER -

TY - JOUR  
ID - 1652

T1 - Beyond informed consent: ethical and philosophical considerations in using behavior modification or play therapy in the treatment of enuresis

A1 - Noll,R.B.  
A1 - Seagull,A.A.  
Y1 - 1982///

N1 - Noll, Robert B. Seagull, Arthur A  
Journal of clinical child psychology  
co7, 7603095

E  
Journal Article  
English  
KW - Behavior  
KW - Behavior Control  
KW - Child  
KW - Conditioning  
KW - Operant  
KW - Freedom  
KW - Humans  
KW - Informed Consent  
KW - Mental Disorders  
KW - Patient Participation  
KW - Personal Autonomy  
KW - Psychotherapy  
KW - Medline  
KW - Unsupervised Play Addition  
RP - NOT IN FILE  
SP - 44  
EP - 49  
JF - Journal of Clinical Child Psychology



JA - J Clin.Child Psychol.

VL - 11

IS - 1

CY - United States

SN - 0047-228X

UR - 11649460

ER -

TY - JOUR

ID - 1653

T1 - Behavioral assessment of peer interaction and social functioning in institutional and structured settings

A1 - Michelson,L.

A1 - Dilorenzo,T.M.

Y1 - 1981/07//

N1 - Michelson, L. Dilorenzo, T M

Journal of clinical psychology

htj, 0217132

IM

Journal Article

English

KW - Adolescent

KW - Affective Symptoms/px [Psychology]

KW - Child

KW - Child Behavior Disorders/px [Psychology]

KW - Institutionalized/px [Psychology]

KW - Female

KW - Humans

KW - Interpersonal Relations

KW - Learning Disorders/px [Psychology]

KW - Male

KW - Peer Group

KW - Play and Playthings

KW - Professional-Patient Relations

KW - Social Adjustment

KW - Medline

KW - Unsupervised Play Addition

RP - NOT IN FILE

SP - 499

EP - 504

JF - Journal of Clinical Psychology

JA - J Clin Psychol

VL - 37

IS - 3

CY - UNITED STATES

N2 - Observed 18 children in a short-term psychiatric facility over a 5-month period using a peer interaction coding system. The direct behavioral observation method was adapted and revised from existing scales to increase reliability and efficiency for use by institutional staff. Response codes included Adaptive Peer Interaction, Maladaptive Peer Interaction, Solitary Independent Play, and Response to Staff. Reliability was assessed on 35% of the total coded intervals, which yielded an overall reliability coefficient of 94.3%. In addition, reliability coefficients were calculated for each individual component behavior, an extremely important but often ignored statistic, and all yielded reliabilities greater than 90%. Normative rates for children on the psychiatric unit also are presented, and discussion is provided concerning the application of this coding system in clinics, schools, and institutional settings

SN - 0021-9762

UR - 7263875

ER -

TY - JOUR

ID - 1654

T1 - Injury and its correlates among 1-year-old children. Study of children with both normal and low birth weights

A1 - McCormick,M.C.

A1 - Shapiro,S.

A1 - Starfield,B.H.

Y1 - 1981/02//

N1 - McCormick, M C. Shapiro, S. Starfield, B H

American journal of diseases of children (1960)

3gs, 0370471

AIM, IM

Journal Article. Research Support, Non-U.S. Gov't

English

KW - Birth Weight

KW - Demography

KW - Humans

KW - Infant

KW - Low Birth Weight

KW - Newborn

KW - Locomotion

KW - Random Allocation

KW - Risk

KW - Sampling Studies

KW - Socioeconomic Factors

KW - United States

KW - Wounds and Injuries/ep [Epidemiology]

KW - Medline

KW - Unsupervised Play Addition

RP - NOT IN FILE

SP - 159

EP - 163

JF - American Journal of Diseases of Children

JA - Am J Dis Child

VL - 135

IS - 2

CY - UNITED STATES

N2 - Factors associated with injury in the first year of life were examined using data on a random sample of infants in eight regions in the United States. By 1 year of age, 8.6% of the 4,989 infants surveyed had had an injury for which medical care was sought, although serious sequelae (eg, death and developmental delay) were infrequent. The data suggest that the achievement of independent mobility, eg, walking, was a major factor in the risk of injury. Other risk factors included very young mothers and isolated mothers, but not socioeconomic status, illness in the infant, or low birth weight. However, identification of small groups at very high risk is not possible, so that health professionals should be prepared to counsel all new parents early about injuries

SN - 0002-922X

UR - 7193407

ER -

TY - JOUR

ID - 1655

T1 - Development of spontaneous manding in language deficient children

A1 - Simic,J.

A1 - Bucher,B.

Y1 - 1980///

N1 - Simic, J. Bucher, B

Journal of applied behavior analysis

0174763, hdr

IM

Journal Article

English

KW - Child

KW - Cues

KW - Education of Intellectually Disabled

KW - Female

KW - Generalization (Psychology)

KW - Humans

KW - Language Development

KW - Language Development Disorders/rh [Rehabilitation]

KW - Language Disorders/rh [Rehabilitation]

KW - Male

KW - Medline

KW - Unsupervised Play Addition

RP - NOT IN FILE

SP - 523

EP - 528

JF - Journal of Applied Behavior Analysis

JA - J Appl.Behav Anal.

VL - 13

IS - 3

CY - UNITED STATES

N2 - Six institutionalized children, aged 7-11, with little or no spontaneous vocal manding, were trained to request food items under appropriate natural conditions when snacks were presented. "I want a" was appropriate when an adult presented food in the playroom. "Out" was appropriate when the items were displayed in the hallway, across a half-door barrier from the child. A sequence of steps was trained, through increasingly naturalistic setting and cuing conditions. The two mands were trained in sequence, not concurrently. To encourage "spontaneous" productions, no vocal cuing was provided by the adult. After criterion performance in each step, several probe sessions were conducted for various cuing conditions, adults, and settings. Probes after imitation training showed no spontaneous manding. Thus, failure of manding was not due to production difficulties. In probes after training for "approximately" natural cues, most children showed little transfer to the natural cues. This implies that training for the specific appropriate cues may often be required. However, good transfer generally occurred across persons, and from training room to playroom. Probes also showed that most children did not use one of the trained mands in the stimulus conditions that were appropriate for the other mand. Thus, adding a second mand did not generally disrupt use of the first. However, significant disruption occurred for two children. Finally, at the end of training, extinction training was given for one mand in one setting. Performance of the other mand was little affected. In sum, the appropriate form of a mand depends on specific stimulus and setting characteristics, and these characteristics must be considered in training

SN - 0021-8855

UR - 7430009

ER -

TY - JOUR

ID - 1656

T1 - Documenting the value of supervised play in a pediatric ambulatory care clinic

A1 - Williams, Y.B.

A1 - Powell, M.

Y1 - 1980///

N1 - Williams, Y B. Powell, M

Journal of the Association for the Care of Children's Health

kek, 8101321

H

Journal Article

English

KW - Child

KW - Child Behavior

KW - Documentation/mt [Methods]

KW - Evaluation Studies as Topic

KW - Hospital Bed Capacity

KW - 500 and over

KW - Humans

KW - Indiana

KW - Outpatient Clinics

KW - Hospital/og [Organization & Administration]

KW - Pediatrics

KW - Play Therapy

KW - Medline

KW - Unsupervised Play Addition

RP - NOT IN FILE

SP - 15

EP - 20

JF - Journal of the Association for the Care of Childrens Health

JA - J Assoc Care Child Health

VL - 9

IS - 1

CY - UNITED STATES

N2 - This study tested the hypothesis that supervision of play in a pediatric ambulatory clinic would increase positive responses and decrease negative responses in outpatients. During the control week, children played unsupervised in the unaltered clinic waiting area; selected behaviors were recorded then and during the experimental week, in which changes introduced in the clinical environment facilitated supervised play. Significant increases in positive responses and significant decreases in negative responses were noted during the experimental week ( $X^2=474.4$ ;  $p < .001$ ). A second study demonstrated that significant changes were not caused by environment alteration alone. The resultant outpatient program and its benefits are described

SN - 0274-8916

UR - 10248699

ER -

TY - JOUR

ID - 1657

T1 - Help-seeking mothers and their children

A1 - Kogan,K.L.

Y1 - 1978///

N1 - Kogan, K L

Child psychiatry and human development

d2b, 1275332

IM

Journal Article. Research Support, U.S. Gov't, P.H.S.

English

KW - Attitude

KW - Behavior Therapy

KW - Child

KW - Child Behavior Disorders/th [Therapy]

KW - Preschool

KW - Counseling

KW - Female

KW - Humans

KW - Male

KW - Maternal Behavior

KW - Mother-Child Relations

KW - Mothers

KW - Play and Playthings

KW - Verbal Behavior

KW - Medline

KW - Unsupervised Play Addition

RP - NOT IN FILE

SP - 204

EP - 218

JF - Child Psychiatry & Human Development

JA - Child Psychiatry Hum Dev

VL - 8

IS - 4

CY - UNITED STATES

N2 - Forty-three mothers sought help with management of childhood behaviors. Presenting complaints in half or more of the families included stubbornness, talking back to parents, disobedience and other traits indicative of parent-child interaction difficulties. Pretreatment behavioral observations revealed that mothers shared common characteristics of being low in positive warmth and high in negative and oppositional responses. The children were observed to share common traits of little independent play, frequent frustration, and either ignored their mothers or were verbally and physically oppositional. Behavioral counselling and monitored rehearsal served to reverse many of the behaviors. Almost all mothers reported reduction in problem behaviors. Mothers varied widely in attributing usefulness to different program components

SN - 0009-398X

UR - 688804

ER -

TY - JOUR

ID - 1658

T1 - Observations of young normal and handicapped children

A1 - Phemister,M.R.

A1 - Richardson,A.M.

A1 - Thomas,G.V.

Y1 - 1978/07//

N1 - Phemister, M R. Richardson, A M. Thomas, G V

Child: care, health and development

7602632, c9x

IM

Journal Article

English

KW - Adolescent

KW - Attention

KW - Child

KW - Child Day Care Centers

KW - Child Development

KW - Preschool

KW - Disabled Persons

KW - Hospital Units

KW - Humans

KW - Infant

KW - Intellectual Disability/px [Psychology]

KW - Interpersonal Relations

KW - Play and Playthings

KW - Self Stimulation

KW - Medline

KW - Unsupervised Play Addition

RP - NOT IN FILE

SP - 247

EP - 259

JF - Child: Care, Health &amp; Development

JA - Child Care Health Dev.

VL - 4

IS - 4

CY - UNITED STATES

N2 - An observational study was made of 1-2-year-old children, and of mentally handicapped children functioning at a similar level, to determine the extent to which they involved themselves in play with toys and other objects and the extent to which their day was "empty". Observations of normal children were made in their homes and in day nurseries; observations of mentally handicapped children were made at home, in day care centres (special schools) and in the schools and wards of subnormality hospitals. In no setting were children interacting with adults for more than 20% of their non-routine time. These findings seem to justify concern over independent play with toys and other objects. The handicapped children in all settings had "emptier" days than the normal children, this being accounted for by greater amounts of inattentive handling of objects and self-stimulation and lesser amounts of social interaction and attentive play. However, attentive play scores for the handicapped children varied markedly with setting. In appropriate circumstances, there can be as much spontaneous contact with objects in handicapped children as in normal children at a similar development level. Despite current concern over the effects of day care on the development of very young children, normal children in day nurseries did not differ from normal children at home, either in attentive play scores or in the proportion of nonroutine time spent interacting with adults

SN - 0305-1862

UR - 149618

ER -

TY - JOUR

ID - 1659

T1 - Surgery of the knee in children with spina bifida

A1 - Birch,R.

Y1 - 1976///

N1 - Birch, R

Developmental medicine and child neurology. Supplement  
0006762

IM

Journal Article

English

KW - Child

KW - Preschool

KW - Humans

KW - Knee/ab [Abnormalities]

KW - Knee/su [Surgery]

KW - Orthopedics

KW - Spinal Dysraphism/co [Complications]

KW - Medline

KW - Unsupervised Play Addition

RP - NOT IN FILE

SP - 111

EP - 113

JF - Developmental Medicine &amp; Child Neurology - Supplementum

JA - Dev Med Child Neurol (Suppl)

IS - 37

CY - UNITED STATES

N2 - The achievement of independent mobility by children with spina bifida is often hampered by deformities of the knee joints. This report reviews the results of surgical treatment in 34 spina-bifida children with knee deformities. The surgical procedures are described and it is concluded that surgery is justified in a proportion of cases with fixed-knee deformities

SN - 0419-0238  
UR - 797602  
ER -

TY - JOUR  
ID - 1660

T1 - MATERNAL RESPONSES TO THE INFANT'S EMERGING AUTONOMY AS ILLUMINATED BY HOME OBSERVATIONS: A CASE REPORT

A1 - MCCOLLUM,A.T.

Y1 - 1964/07//

N1 - MCCOLLUM, A T

Journal of the American Academy of Child Psychiatry

7505568, h54

OM

Journal Article

English

KW - Child Psychology

KW - Infant

KW - Infant Care

KW - Infant Nutritional Physiological Phenomena

KW - Parent-Child Relations

KW - Play and Playthings

KW - Pregnancy

KW - psychology

KW - Medline

KW - Unsupervised Play Addition

RP - NOT IN FILE

SP - 516

EP - 535

JF - Journal of the American Academy of Child Psychiatry

JA - J Am Acad Child Psychiatry

VL - 3

CY - UNITED STATES

SN - 0002-7138

UR - 14179096

ER -

TY - JOUR  
ID - 1661

T1 - Permissiveness, permission, and aggression: the effect of adult presence or absence on aggression in children's play

A1 - SIEGEL,A.E.

A1 - KOHN,L.G.

Y1 - 1959/03//

N1 - SIEGEL, A E. KOHN, L G

Child development

0372725, d28

OM

Journal Article

English

KW - Behavior

KW - Projective Techniques

KW - Medline

KW - Unsupervised Play Addition

RP - NOT IN FILE

SP - 131

EP - 141  
 JF - Child Development  
 JA - Child Dev.  
 VL - 30  
 IS - 1  
 CY - Not Available  
 SN - 0009-3920  
 UR - 13629745  
 ER -

TY - JOUR  
 ID - 1662  
 T1 - I like my dog, does my dog like me?

A1 - Rehn, Therese  
 A1 - Lindholm, Ulrika  
 A1 - Keeling, Linda  
 A1 - Forkman, Björn

Y1 - 2014/01//  
 KW - PsycInfo  
 KW - Unsupervised Play Addition  
 KW - Dogs  
 KW - affectional bond  
 KW - Behavior  
 KW - attachment style  
 KW - Animal Ethology  
 KW - Attachment Behavior  
 KW - Affection

RP - NOT IN FILE  
 SP - 65

EP - 73  
 JF - Applied Animal Behaviour Science  
 VL - 150

CY - Netherlands  
 PB - Elsevier Science

U1 - Sponsor: Swedish Research Council for Environment, Agricultural Sciences and Spatial Planning; Sweden. Recipients: No recipient indicated

N2 - In this study, the possibility of there being an association between how an owner perceives his/her relationship to their dog and the way the dog experiences the relationship to its owner was investigated using two well-established methods within the anthrozoology literature. Twenty dog-owner dyads participated in the Strange Situation Procedure (SSP), to evaluate the bond on the dog's part, and the Monash Dog Owner Relationship Scale (MDORS) was used to investigate the strength of the relationship from the owner's view. Six attachment variables were created based on changes in the dogs' behaviour when it was with the owner vs. when it was with the stranger in the SSP. These were: changes in exploration, passive behaviour, independent play, social play, physical contact and tail wagging. The magnitude of these changes in the dogs' behaviour was then tested for correlations with the owners' scores in the MDORS. Only two correlations were found and both were with the MDORS subscale that measures "Dog-owner interaction". They suggested that owners who interact more frequently with their dog, have dogs showing more proximity-seeking behaviour upon reunion ( $r = 0.56$ ,  $P = 0.01$ ,  $N = 20$ ) and less independent play behaviour ( $r = 0.52$ ,  $P = 0.02$ ,  $N = 20$ ). This might be a consequence of dogs being positively reinforced for close interaction by the owner, or these dogs may have developed an attachment style similar to insecurely attached children. No correlation was found between any of the six attachment variables in the SSP and the overall MDORS score, the MDORS subscale "Perceived costs" and, more importantly, no correlation to "Perceived emotional closeness". In summary, there is no support from this study for the view that the strength of the relationship an owner feels to his/her dog is mirrored in the strength of the bond of the dog to its owner. (PsycINFO Database Record (c) 2014 APA, all rights reserved) (journal abstract)

SN - 0168-1591



AD - Rehn, Therese, Department of Animal Environment and Health, Swedish University of Agricultural Sciences Box 7068, SE-750 07, Uppsala, Sweden, Therese.Rehn@slu.se

UR - <http://search.ebscohost.com/login.aspx?direct=true&db=psych&AN=2013-40463-001&site=ehost-live>;Therese.Rehn@slu.se

L3 - 10.1016/j.applanim.2013.10.008

ER -

TY - CHAP

ID - 1663

T1 - Pretend play and creativity: An overview

A1 - Russ,Sandra W.

Y1 - 2014///

N1 - Accession Number: 2013-18606-002. First Author & Affiliation: Russ, Sandra W.; Case Western Reserve University, Cleveland, OH, US. Release Date: 20131111. Publication Type: Book, (0200); Authored Book, (0240); . Media Covered: Print. Document Type: Chapter. Book Type: Textbook/Study Guide. ISBN: 1-4338-1561-3, Hardcover, 1433815613; 978-1-4338-1561-4, Hardcover, 9781433815614. Language: English. Major Descriptor: Cognitive Processes; Creativity; Pretend Play. Classification: Psychosocial & Personality Development (2840) . Population: Human (10); . Age Group: Childhood (birth-12 yrs) (100) Adolescence (13-17 yrs) (200) Adulthood (18 yrs & older) (300) . Intended Audience: Psychology: Professional & Research (PS) . Tests & Measures: Affect in Play Scale [Appended]; Creative Achievement Questionnaire [Appended] DOI: 10.1037/t05569-000; . Page Count: 22

KW - PsycInfo

KW - Unsupervised Play Addition

KW - Pretend Play

KW - Creativity

KW - cognitive & affective processes

KW - creative processes

KW - Cognitive Processes

RP - NOT IN FILE

SP - 7

EP - 28

T2 - Pretend play in childhood: Foundation of adult creativity

CY - Washington, DC US

PB - American Psychological Association

N2 - (from the chapter) Creativity and pretend play are both multidimensional. Many cognitive and affective processes are involved, and there are differences across individuals for each process. There is overlap among processes that occur in pretend play and processes that occur in creativity. This introductory chapter first reviews definitions of creativity, with a focus on creative products and creative people. It emphasizes the cognitive and affective processes involved in creativity and considers how different creative processes are involved in different stages of creative production. Next, it reviews definitions of pretend play, with a focus on cognitive and affective processes in pretend play. Finally, it presents a model showing the overlap between pretend play and adult creativity. This chapter provides only an overview of processes that occur in both the pretend play of the child and the creative acts of the adult; later chapters present the theories and research in greater depth. When we think about creativity, we encounter different aspects of the construct. First there is the creative product-the actual artwork or scientific discovery that the field labels as being creative. There is also the person who is the maker of the creative product. What are the internal processes that enable an individual to think in a creative fashion? The distinction between product and process is an important one (Golann, 1963; Mackinnon, 1962). (PsycINFO Database Record (c) 2013 APA, all rights reserved) (chapter)

SN - 1-4338-1561-3

UR - <http://search.ebscohost.com/login.aspx?direct=true&db=psych&AN=2013-18606-002&site=ehost-live>

L3 - 10.1037/14282-002

ER -

TY - JOUR

ID - 1664

T1 - Go out and play, but mean it: Using frame analysis to explore recent news media coverage of the rediscovery of unstructured play

A1 - Bishop,Ronald

Y1 - 2013/12//

KW - PsycInfo

KW - Unsupervised Play Addition

KW - news media coverage

KW - unstructured play

KW - newspapers

KW - Magazines

KW - journalists

KW - Mass Media

RP - NOT IN FILE

SP - 510

EP - 520

JF - The Social Science Journal

VL - 50

IS - 4

CY - Netherlands

PB - Elsevier Science

N2 - A frame analysis was conducted on newspaper articles, news magazine articles, and the transcripts of broadcast segments on the need for and rediscovery of unstructured play that appeared between January 1, 2005 and December 31, 2010. This time frame was selected to coincide with the recent revival of interest in play, both among scholars and the public. The eight frames that emerged from the coverage reveal that the spontaneity in play valued by children and endorsed by scholars is absent from recent descriptions by journalists of play. Journalists did not frame play as a respite for children from daily life, or an "interlude" (Huizinga, 1971, p. 21) undertaken to escape the real world. Play as portrayed through these frames must be productive-a "useful pastime" (Chudacoff, 2007, p. 222). Descriptions of play by journalists support the "rhetoric of progress" discussed by Sutton-Smith. Play is seen as the "optimal state of being for children" (Gentry, 2009, p. 14A), rather than something a child simply wants to do for fun. Few of the sources consulted by journalists favor letting kids go off in an unsupervised fashion. Kids can play, but only if they do so in clearly defined spaces and according to clearly laid out schedules. (PsycINFO Database Record (c) 2014 APA, all rights reserved) (journal abstract)

SN - 0362-3319

AD - Bishop, Ronald, Department of Culture and Communication, Drexel University 569 Hemingway Drive, Hockessin, DE, US, 19707, rcbsam@comcast.net

UR - <http://search.ebscohost.com/login.aspx?direct=true&db=psyh&AN=2013-42164-012&site=ehost-live;rcbsam@comcast.net>

L3 - 10.1016/j.soscij.2013.07.014

ER -

TY - JOUR

ID - 1665

T1 - Psychological essentialism among Korean children and adults: A modified replication study

A1 - Kim,Geunyoung

Y1 - 2013/10//

KW - PsycInfo

KW - Unsupervised Play Addition

KW - psychological essentialism development

KW - Age Differences

KW - cultural factors

KW - Personality

KW - Psychological Development

KW - Sociocultural Factors

RP - NOT IN FILE

SP - 809

EP - 817

JF - International Journal of Psychology

JA - Int J Psychol

VL - 48

IS - 5

CY - United Kingdom

PB - Taylor & Francis

U1 - Sponsor: Sogang University; Korea. Grant: 201110077.01. Other Details: Research Grant. Recipients: No recipient indicated

N2 - Developmental psychologists have shown interest in the development of psychological essentialism among children; that is, a belief that certain psychological characteristics (such as personality) are relatively stable and unchanging. Although previous studies have shown that children are essentialistic about human traits, and the coherence among various essentialism dimensions increases with age, moderating cultural factors in the development of essentialism, especially among Asian children, have received little attention. Using the methodologies of Gelman, Heyman, and Legare (2007), levels of psychological essentialism among Korean children and adults were measured, and compared with the original US data. Results demonstrated cross-cultural similarity in the development of coherence in essentialistic thought, and difference in the level of essentialism among adult participants. The present findings imply that different cultural values between Asians and Westerners can play a role in the developmental trajectory of psychological essentialism. (PsycINFO Database Record (c) 2014 APA, all rights reserved) (journal abstract)

SN - 1464-066X

AD - Kim, Geunyoung, Department of Psychology, Sogang University 35 Baekbeom-ro (Sinsudong), Mapo-gu, Seoul, Korea, 121-742, [king@sogang.ac.kr](mailto:king@sogang.ac.kr)

UR - <http://search.ebscohost.com/login.aspx?direct=true&db=psyh&AN=2013-32364-007&site=ehost-live;king@sogang.ac.kr>

L3 - 10.1080/00207594.2012.693182

ER -

TY - JOUR

ID - 1666

T1 - Freedom, flow and fairness: Exploring how children develop socially at school through outdoor play

A1 - Waite,Sue

A1 - Rogers,Sue

A1 - Evans,Julie

Y1 - 2013/09//

KW - PsycInfo

KW - Unsupervised Play Addition

KW - Freedom

KW - fairness

KW - outdoor play

KW - social interactions

KW - Classroom Behavior

KW - Childhood Development

KW - Childhood Play Behavior

KW - Social Interaction

KW - Recreation

RP - NOT IN FILE

SP - 255

EP - 276

JF - Journal of Adventure Education and Outdoor Learning

VL - 13

IS - 3

CY - United Kingdom

PB - Taylor & Francis

U1 - Sponsor: Economic and Social Research Council; United Kingdom. Grant: RES-000-22-3065. Date: From January, 2009 to May, 2011. Other Details: 'Opportunities Afforded by the Outdoors for Alternative Pedagogies in the Transition between Foundation Stage and Year 1'. Recipients: Waite, Sue; Rogers, Sue; Evans, Julie

N2 - In this article, we report on a study that sought to discover micro-level social interactions in fluid outdoor learning spaces. Our methodology was centred around the children; our methods moved with them and captured their social interactions through mobile audio-recording. We argue that our methodological approach supported access to negotiations beyond adult gaze whilst acknowledging some associated ethical and practical dilemmas. Outdoor contexts were characterised by lower levels of adult presence and control and were associated with freedom to engage in sustained inter-child play and interaction. We theorise how opportunities to practice pro-social behaviour contribute to children's social cohesion in the classroom and what adults can learn from such instances in order to support children's social development and learning. Children's conversations are analysed through conceptual lenses of cultures of play, schooling and society. (PsycINFO Database Record (c) 2013 APA, all rights reserved) (journal abstract)

SN - 1754-0402

AD - Waite, Sue, School of Education, Faculty of Health, Education and Society, Plymouth University , Plymouth, United Kingdom, PL4 8AA, sjwaite@plymouth.ac.uk

UR - <http://search.ebscohost.com/login.aspx?direct=true&db=psych&AN=2013-28756-007&site=ehost-live;sjwaite@plymouth.ac.uk>

L3 - 10.1080/14729679.2013.798590

ER -

TY - JOUR

ID - 1667

T1 - Child-friendly urban structures: Bullerby revisited

A1 - Broberg,Anna

A1 - Kytt,,Marketta

A1 - Fagerholm,Nora

Y1 - 2013/09//

KW - PsycInfo

KW - Unsupervised Play Addition

KW - environmental child friendliness

KW - Built Environment

KW - Urban Areas

KW - emotional affordances

KW - Physical Environment

KW - Childhood Development

KW - Emotional Development

KW - Urban Environments

RP - NOT IN FILE

SP - 110

EP - 120

JF - Journal of Environmental Psychology

VL - 35

CY - Netherlands

PB - Elsevier Science

U1 - Sponsor: Tekes. Recipients: No recipient indicated;Sponsor: Finnish Funding Agency for Technology and Innovation; Finland. Recipients: No recipient indicated;Sponsor: Finnish Ministry of Education and Culture; Finland. Recipients: No recipient indicated

N2 - Definitions of environmental child friendliness offer broad criteria that are not easy to study or assess. We suggest that due to this broadness, these definitions have produced surprisingly few attempts to evaluate how child-friendly various types of physical environments are. The purpose of this study is to analyse how the structure of the built environment contributes to environmental child friendliness. We define child friendliness by two central criteria: children's possibilities for independent mobility and their opportunities to actualize environmental affordances. We study how built environment qualities condition environmental child friendliness in place-based ways by asking children and youth in Turku, Finland, to tell about their meaningful places and their mobility to these. The data consists of over 12,000 affordances, localized by the respondents.

This experiential and behavioural place-based knowledge is combined with objectively measured data on residential and building density, and quantity of green structures. Moderate urban density seems to have child-friendly characteristics such as an ability to promote independent access to meaningful places and the diversity of affordances. We find that affordances situated on residential areas are likely to be reached alone, whereas access to affordances situated in densely built urban cores is less independent. The proportion of green structures is not associated with independent access. The diversity of affordances is highest in areas that are densely populated and not very green. Green areas are important settings for doing things, and green structures around emotional affordances increase the likelihood of liking the place significantly. Combining children's place-based experiences with information derived from objective measurable qualities of the physical environment provides a valuable methodological contribution to studies on environmental child friendliness, and the two proposed criteria of child friendliness are supported by this study. There is no one environment that is child-friendly, but different environments have different uses and meanings. (PsycINFO Database Record (c) 2013 APA, all rights reserved) (journal abstract)

SN - 0272-4944

AD - Broberg, Anna, Department of Surveying and Planning, Aalto University P.O. Box 12200, 00076, Aalto, Finland, anna.broberg@aalto.fi

UR - <http://search.ebscohost.com/login.aspx?direct=true&db=psych&AN=2013-27385-013&site=ehost-live;ncfage@utu.fi;marketta.kytta@aalto.fi;anna.broberg@aalto.fi>

L3 - 10.1016/j.jenvp.2013.06.001

ER -

TY - JOUR

ID - 1669

T1 - Where do children travel to and what local opportunities are available? The relationship between neighborhood destinations and children's independent mobility

A1 - Villanueva, Karen

A1 - Giles-Corti, Billie

A1 - Bulsara, Max

A1 - Timperio, Anna

A1 - McCormack, Gavin

A1 - Beesley, Bridget

A1 - Trapp, Georgina

A1 - Middleton, Nicholas

Y1 - 2013/08//

KW - PsycInfo

KW - Unsupervised Play Addition

KW - CHILDREN

KW - destinations

KW - independent mobility

KW - Neighborhoods

KW - Travel

KW - Commuting (Travel)

KW - Physical Activity

KW - Physical Mobility

RP - NOT IN FILE

SP - 679

EP - 705

JF - Environment and Behavior

VL - 45

IS - 6

CY - US

PB - Sage Publications

U1 - Sponsor: National and Medical Research Council. Grant: 403933. Recipients: No recipient indicated; Sponsor: Sponsor name not included. Other Details: Ad Hoc Scholarships. Recipients: Villanueva, Karen; Trapp, Georgina; Sponsor: National Health and Medical Research Council. Grant: 458668. Other Details: Capacity Building Grant. Recipients: Trapp, Georgina; Sponsor: National Health and Medical Research Council.

Grant: 1004900. Other Details: Principal Fellow Award. Recipients: Giles-Corti, Billie; Sponsor: VicHealth.  
 Grant: 2004 0536. Other Details: Public Health Research Fellowship. Recipients: Timperio, Anna; Sponsor:  
 Alberta Heritage Foundation. Other Details: Award for Medical Research Postdoctoral Fellowship. Recipients:  
 McCormack, Gavin

N2 - Associations between access to local destinations and children's independent mobility (IM) were examined. In 2007, 10- to 12-year-olds (n = 1,480) and their parents (n = 1,314) completed a survey. Children marked on a map the destinations they walked or cycled to (n = 1,132), and the availability of local destinations was assessed using Geographic Information Systems. More independently mobile children traveled to local destinations than other children. The odds of IM more than halved in both boys and girls whose parents reported living on a busy road (boys, OR = 0.48; girls, OR = 0.36) and in boys who lived near shopping centers (OR = 0.18) or community services (OR = 0.25). Conversely, the odds of IM more than doubled in girls living in neighborhoods with well-connected low-traffic streets (OR = 2.32) and increased in boys with access to local recreational (OR = 1.67) and retail (OR = 1.42) destinations. Creating safe and accessible places and routes may facilitate children's IM, partly by shaping parent's and children's feelings of safety while enhancing their confidence in the child's ability to use active modes without an adult. (PsycINFO Database Record (c) 2013 APA, all rights reserved) (journal abstract)

SN - 1552-390X

AD - Villanueva, Karen, Centre for the Built Environment and Health (M707), School of Population Health, The University of Western Australia 35 Stirling Highway, Crawley, WA, US, 6009,  
 karen.villanueva@uwa.edu.au

UR - <http://search.ebscohost.com/login.aspx?direct=true&db=psyh&AN=2013-23864-001&site=ehost-live>; karen.villanueva@uwa.edu.au

L3 - 10.1177/0013916512440705

ER -

TY - JOUR

ID - 1671

T1 - The development of organized visual search

A1 - Woods, Adam J.

A1 - G'ksun, Tilbe

A1 - Chatterjee, Anjan

A1 - Zelonis, Sarah

A1 - Mehta, Anika

A1 - Smith, Sabrina E.

Y1 - 2013/06//

KW - PsycInfo

KW - Unsupervised Play Addition

KW - visual search development

KW - guiding behavior

KW - Childhood Development

KW - Visual Search

RP - NOT IN FILE

SP - 191

EP - 199

JF - Acta Psychologica

VL - 143

IS - 2

CY - Netherlands

PB - Elsevier Science

U1 - Sponsor: National Institutes of Health; US. Grant: T32NS007413; R01 DC008779. Recipients: No recipient indicated

N2 - Visual search plays an important role in guiding behavior. Children have more difficulty performing conjunction search tasks than adults. The present research evaluates whether developmental differences in children's ability to organize serial visual search (i.e., search organization skills) contribute to performance limitations in a typical conjunction search task. We evaluated 134 children between the ages of 2 and 17 on separate tasks measuring search for targets defined by a conjunction of features or by distinct features. Our

results demonstrated that children organize their visual search better as they get older. As children's skills at organizing visual search improve they become more accurate at locating targets with conjunction of features amongst distractors, but not for targets with distinct features. Developmental limitations in children's abilities to organize their visual search of the environment are an important component of poor conjunction search in young children. In addition, our findings provide preliminary evidence that, like other visuospatial tasks, exposure to reading may influence children's spatial orientation to the visual environment when performing a visual search. (PsycINFO Database Record (c) 2013 APA, all rights reserved) (journal abstract)

SN - 0001-6918

AD - Woods, Adam J., Department of Neurology, University of Pennsylvania 3710 Hamilton Walk, room 319, Philadelphia, PA, US, 19104, woodsaj@gmail.com

UR - <http://search.ebscohost.com/login.aspx?direct=true&db=psych&AN=2013-16319-006&site=ehost-live>; adwoods@mail.med.upenn.edu

L3 - 10.1016/j.actpsy.2013.03.008

ER -

TY - JOUR

ID - 1672

T1 - Evaluation of learning outcomes using an educational iPhone game vs. traditional game

A1 - Furi ç, David

A1 - Gonz lez-Gancedo, Santiago

A1 - Juan, M. Carmen

A1 - Segu ; Ignacio

A1 - Rando, Noem ;

Y1 - 2013/05//

KW - PsycInfo

KW - Unsupervised Play Addition

KW - educational evaluation

KW - learning outcomes

KW - Educational Games

KW - iPhone games

KW - traditional games

KW - subject preferences

KW - Computer Games

KW - Curriculum

KW - Educational Measurement

KW - School Learning

KW - Preferences

RP - NOT IN FILE

SP - 1

EP - 23

JF - Computers & Education

VL - 64

CY - Netherlands

PB - Elsevier Science

U1 - Sponsor: Sponsor name not included. Grant: TIN2009-14319-C02. Other Details: Spanish APRENDRA Project. Recipients: No recipient indicated

N2 - In this paper, we present an initial study to determine the subject preferences for educational computer games for children, in which 150 education professionals participated. From the results of this first study, we have developed an iPhone game for transmitting knowledge as part of multiculturalism, solidarity and tolerance following established learning theories, several design principles, and the objectives and competences of the Spanish law for primary education. We also report on a second study to determine whether the iPhone game has better learning outcomes than a traditional game by analyzing the participation of 84 children ranging in age from 8 to 10 years old. The frequency of playing with consoles or computer games was also taken into account in this second study, and the worldwide trend of previous studies has been corroborated. For learning outcomes, the results did not show significant differences between the two groups. However, 96% of the children indicated that they would like to play with the iPhone game again, and 90% indicated that they preferred the experience

with the iPhone game over the traditional one. From these results, we can conclude that the children achieved similar knowledge improvements using both the autonomous game (iPhone game) and the custom, guided game (traditional game). This could facilitate versatility in the learning process since the learning activity could be performed at any place and time without requiring supervision. Therefore, it could be a useful tool in the learning process and help teachers to fulfill students' training needs. (PsycINFO Database Record (c) 2013 APA, all rights reserved) (journal abstract)

SN - 0360-1315

AD - Juan, M.-Carmen, Instituto Universitario de Automatica e Informatica Industrial, Universitat Politecnica de Valencia Camino de Vera, s/n., 46022, Valencia, Spain, mcarmen@dsic.upv.es

UR - <http://search.ebscohost.com/login.aspx?direct=true&db=psych&AN=2013-09432-002&site=ehost-live;mcarmen@ai2.upv.es>

L3 - 10.1016/j.compedu.2012.12.001

ER -

TY - CHAP

ID - 1674

T1 - Cognitive-behavioral-ecological intervention to facilitate social-emotional understanding and social interaction in youth with high-functioning ASD

A1 - Bauminger-Zviely,Nirit

Y1 - 2013///

N1 - Accession Number: 2013-32785-010. First Author & Affiliation: Bauminger-Zviely, Nirit; Graduate Program in Special Education, School of Education, Bar-Ilan University, Ramat-Gan, Israel. Release Date: 20131125. Publication Type: Book, (0200); Edited Book, (0280); . Media Covered: Print. Document Type: Chapter. ISBN: 978-1-4625-1048-1, Hardcover, 9781462510481. Language: English. Major Descriptor: Cognitive Ability; Cognitive Behavior Therapy; Pervasive Developmental Disorders; Social Interaction; Social Skills. Minor Descriptor: Ability Level; Autism; Intervention. Classification: Developmental Disorders & Autism (3250) . Population: Human (10); . Age Group: Childhood (birth-12 yrs) (100) School Age (6-12 yrs) (180) Adolescence (13-17 yrs) (200) . Intended Audience: Psychology: Professional & Research (PS) . Tests & Measures: Social Responsiveness Scale; Nonverbal Accuracy 2-Child Facial Expressions; Problem Solving Measure; Emotion Inventory Measure; Affective Matching Measure; Loneliness Rating Scale; Self Perception Profile of Children; Autism Diagnostic Interview-Revised; Social Skills Rating System; . Methodology: Empirical Study; Quantitative Study. References Available: Y.. Page Count: 30

KW - PsycInfo

KW - Unsupervised Play Addition

KW - cognitive-behavioral-ecological intervention

KW - socio-intervention

KW - Social Interaction

KW - high-functioning youth

KW - autism spectrum disorder

KW - Cognitive Ability

KW - Cognitive Behavior Therapy

KW - Pervasive Developmental Disorders

KW - Social Skills

KW - Ability Level

KW - Autism

KW - Intervention

RP - NOT IN FILE

SP - 226

EP - 255

T2 - CBT for children and adolescents with high-functioning autism spectrum disorders

A2 - Scarpa,Angela

A2 - Williams White,Susan

A2 - Attwood,Tony

CY - New York, NY US

PB - Guilford Press



N2 - (from the chapter) Social functioning-more specifically, interacting with peers and understanding social situations-is a lifelong struggle for individuals with autism spectrum disorders (ASD) at different levels of functioning. Billstedt, Gillberg, and Gillberg (2007) recently demonstrated the persistence of the social-communicative reciprocity deficit in ASD from early childhood into adulthood. In their study, 15 of 22 symptoms of deficient social interaction skills were still present in adulthood for half or more of their sample. Major difficulties appeared in adults' reciprocal peer interactions, which were infrequent as well as inappropriate, including inappropriate emotional responses to peers; a one-sided, self-centered social approach; infrequent physical expressions of affection; inappropriate conventions; and poor or unfocused eye contact. Predictors of better adult outcomes were speech before 5 years and higher IQ; higher-functioning individuals scored better. Indeed, ASD research on children has also linked IQ with peer interaction outcomes. For example, children with an IQ over 85 had more friends than those with an IQ under 85 (Mazurek & Kanne, 2010), and higher Verbal IQ correlated with better dyadic friendship qualities such as responsiveness and coordinated play (e.g., Bauminger et al., 2008). To set the stage for the proposed intervention guidelines, I first review the multidimensional social deficit in HFASD, as well as recent multimodal social intervention studies designed specifically for HFASD that adopt cognitive-behavioral therapy (CBT) principles. Next, I present a multidimensional social intervention for HFASD that combines CBT with ecological treatment (Bauminger, 2002, 2007a, 2007b), emphasizing its practical aspects and research supporting its efficacy. Finally, I end with suggestions for future research in the area of social intervention for school-age children with HFASD. (PsycINFO Database Record (c) 2013 APA, all rights reserved) (chapter)

SN - 978-1-4625-1048-1

UR - <http://search.ebscohost.com/login.aspx?direct=true&db=psyh&AN=2013-32785-010&site=ehost-live>

ER -

TY - THES

ID - 1675

T1 - A cross-cultural investigation of the threat-superiority effect: Evidence for perceptual biases shaped by experience and natural selection

A1 - Penkunas, Michael James

Y1 - 2013///

N1 - Accession Number: 2013-99200-389. First Author & Affiliation: Penkunas, Michael James; U California, Davis, US. Other Journal Titles: Dissertation Abstracts International. Release Date: 20131104. Publication Type: Dissertation Abstract, (0400); . Media Covered: Electronic. Document Type: Dissertation. Dissertation Number: AAI3544793. ISBN: 978-1-267-75975-7, 9781267759757. Language: English. Major Descriptor: Age Differences; Cross Cultural Differences; Threat. Minor Descriptor: Reaction Time; South Asian Cultural Groups; Visual Search; Visual Attention; Executive Function. Classification: General Psychology (2100) . Population: Human (10); Male (30); Female (40); . Location: US. Age Group: Childhood (birth-12 yrs) (100) Preschool Age (2-5 yrs) (160) Adulthood (18 yrs & older) (300) . Methodology: Empirical Study; Quantitative Study

KW - PsycInfo

KW - Unsupervised Play Addition

KW - experiences

KW - threat

KW - Visual Attention

KW - reaction time

KW - Aging

KW - Age Differences

KW - Cross Cultural Differences

KW - South Asian Cultural Groups

KW - Visual Search

KW - Executive Function

RP - NOT IN FILE

JF - Dissertation Abstracts International: Section B: The Sciences and Engineering

VL - 74

IS - 4-B(E)

CY - US

PB - ProQuest Information & Learning

N2 - The threat-superiority effect is characterized by the preferential recruitment of visual attention by potentially threatening visual features over nonthreatening visual features. This perceptual phenomenon may be the historical product of natural selection shaping the human visual system to detect rapidly the various ecological dangers in complex settings. While previous investigations into visual biases in detecting dangerous animals have focused primarily on snakes, a host of predators besides snakes have also acted as persistent sources of selection on human ancestors. Chapter 1 replicated and expanded upon previous research on the threat-superiority effect using visual-search tasks in three experiments. The first experiment presented American preschool-age children and adults with 3 x 3 matrices of either a single snake target embedded in lizard images or a single lizard target embedded in snake images. Twenty-four trials were presented using a touch-screen enabled LCD monitor. Children's reaction times to detect the target animals were analyzed using multiple regression with age, sex, target animal type, and age by target type interaction as predictor variables. Adult RT data were analyzed using two-factor randomized group analyses of variance and tests of simple effects with sex and target type as independent variables. In this experiment, both children and adults were faster at detecting target snake images juxtaposed randomly in matrices of visually similar lizards than target lizard images juxtaposed randomly in matrices of snakes. This study provided a more stringent test for the advanced detection of snakes by comparing the salience of snakes to visually similar lizards. In the second experiment, I provided the first evidence that American preschool-age children and adults preferentially detected target images of lions over images of antelope. This ability in children and adults possibly reflects a predisposition for detecting large-bodied felids, which fossil record suggests have hunted hominins for the past 7 million years. In the third experiment, American preschool-age children and adults were presented with target cows embedded in matrices of horses and the converse. The results of this experiment showed that adult women preferentially detected target images of horses over target images of cows, an effect that was not present for adult men and preschool children of either sex. To complement this experiment, a child-adapted Stroop-like test examined the executive function of children as a predictor of reaction time on the visual search task. The inclusion of the executive function test did not improve the predictive power of the regression model, indicating that the age variable may be acting as a proxy measure for the cognitive skills normally acquired during early childhood. The combined results of the three experiments in Chapter 1 indicate that the human visual system is indeed sensitive to snake images as well as historical predators other than snakes. Nevertheless, evidence of a bias for horse detection suggests that experience plays a role in the development of visual biases across the life span. To examine the role of experience in the acquisition of biases in animal detection, three to eight year-old children from two distinct populations in southern India were tested on the three visual-search tasks described in Chapter 1. Chapter 2 provides evidence that the visual biases towards snakes and lions are not unique to American participants, but instead might constitute a reliably developing feature of the human visual system. This multi-site study included two populations of children in southern India who have very different experiences with dangerous wildlife. (PsycINFO Database Record (c) 2013 APA, all rights reserved)

SN - 0419-4217

UR - <http://search.ebscohost.com/login.aspx?direct=true&db=psyh&AN=2013-99200-389&site=ehost-live>

ER -

TY - JOUR

ID - 1676

T1 - Adult mediation of children's television viewing experiences as a catalyst for learning and development: A case study, using Play School

A1 - van Vliet,Helen

A1 - Harrison,Cathie

A1 - Anderson,Tracy

Y1 - 2013/01//

KW - PsycInfo

KW - Unsupervised Play Addition

KW - adult mediation

KW - children's television viewing experiences

KW - Learning

KW - Development

KW - behavioral responses

KW - Childhood Development

KW - Mediation

KW - Responses  
KW - Television Viewing  
KW - Behavior  
RP - NOT IN FILE  
SP - 17  
EP - 36  
JF - Early Child Development and Care  
VL - 183  
IS - 1  
CY - United Kingdom  
PB - Taylor & Francis  
U1 - Sponsor: ACU/Australian Broadcasting Corporation (ABC); Australia. Other Details: ACU Industry Research Incentive Scheme (IRIS). Recipients: No recipient indicated  
N2 - The television programme Play School is screened free to air in Australia on weekdays. Adult presenters guide child viewers through experiences of play and learning. An online survey assessed behavioural responses of adult co-viewers both during and after the programme to ascertain how adult co-viewers were participating in, or support the viewing experience of child viewers. Results revealed a large number and variety of behavioural responses from adults both during and after viewing. These responses can be viewed as positive as they appear to facilitate learning and development through shared interactions between adult and child. This research begins to elucidate how adult behaviours during and after viewing television may optimise the child's learning experience. (PsycINFO Database Record (c) 2013 APA, all rights reserved) (journal abstract)  
SN - 1476-8275  
AD - van Vliet, Helen, School of Education, Australian Catholic University Strathfield Campus, 25A Barker Road, Strathfield, Sydney, NSW, Australia, 2135, helen.vanvliet@acu.edu.au  
UR - <http://search.ebscohost.com/login.aspx?direct=true&db=psyh&AN=2012-34710-002&site=ehost-live;helen.vanvliet@acu.edu.au>  
L3 - 10.1080/03004430.2011.653810  
ER -  
  
TY - CHAP  
ID - 1677  
T1 - Adoptive parenting of teenagers and young adults  
A1 - White, Joseph  
Y1 - 2013///  
N1 - Accession Number: 2013-21144-009. First Author & Affiliation: White, Joseph; Private Practice, Austin, TX, US. Release Date: 20131007. Publication Type: Book, (0200); Edited Book, (0280); . Media Covered: Print. Document Type: Chapter. ISBN: 978-1-118-10912-0, Paperback, 9781118109120; 978-1-118-41615-0, Electronic, 9781118416150; 978-1-118-41891-8, Electronic, 9781118418918; 978-1-118-61169-2, Electronic, 9781118611692. Language: English. Major Descriptor: Adolescent Development; Adopted Children; Adoptive Parents; Adult Development; Parent Child Relations. Minor Descriptor: Adoption (Child); Attachment Behavior; Identity Formation; Independence (Personality); Separation Individuation. Classification: Childrearing & Child Care (2956) Psychosocial & Personality Development (2840) . Population: Human (10); Male (30); Female (40); . Age Group: Adolescence (13-17 yrs) (200) Adulthood (18 yrs & older) (300) Young Adulthood (18-29 yrs) (320) . Intended Audience: Psychology: Professional & Research (PS) . Page Count: 12  
KW - PsycInfo  
KW - Unsupervised Play Addition  
KW - adoptive parenting  
KW - Adolescents  
KW - young adults  
KW - parent-child relationship  
KW - identity development  
KW - Autonomy  
KW - individuation  
KW - attachment  
KW - Adolescent Development  
KW - Adopted Children

- KW - Adoptive Parents  
 KW - Adult Development  
 KW - Parent Child Relations  
 KW - Adoption (Child)  
 KW - Attachment Behavior  
 KW - Identity Formation  
 KW - Independence (Personality)  
 KW - Separation Individuation  
 RP - NOT IN FILE  
 SP - 169  
 EP - 180  
 T2 - Working with adoptive parents: Research, theory, and therapeutic interventions  
 A2 - Brabender, Virginia M.  
 A2 - Fallon, April E.  
 CY - Hoboken, NJ US  
 PB - John Wiley & Sons Inc  
 N2 - (from the chapter) This chapter addresses adoptive parenting issues associated with parenting adolescents. Parenting of adolescents and young adults can present challenges for any parent-either adoptive or birth-due to the developmental characteristics of youth at this age. These typical characteristics can interact with the difficult history of some adopted children, resulting in further challenges to the parent-child relationship. Parenting adolescents and young adults, whether adopted or nonadopted, presents inherent challenges associated with the major tasks of this developmental period, including the development of identity and the drive for independence and autonomy. The difficult (or missing) history of some adopted children can result in further challenges to the parent-child relationship. Both the facts of the adoption history and their perceived meaning play a critical role in the development of identity in the adopted child. Healthy individuation can be affected by both the quality of attachment and the degree to which birth families normalize or pathologize behaviors associated with the drive for autonomy and independence. (PsycINFO Database Record (c) 2013 APA, all rights reserved) (chapter)  
 SN - 978-1-118-10912-0  
 UR - <http://search.ebscohost.com/login.aspx?direct=true&db=psych&AN=2013-21144-009&site=ehost-live>  
 ER -
- TY - BOOK  
 ID - 1678  
 T1 - Free to learn: Why unleashing the instinct to play will make our children happier, more self-reliant, and better students for life  
 A1 - Gray, Peter  
 Y1 - 2013//  
 N1 - Accession Number: 2012-32884-000. First Author & Affiliation: Gray, Peter; Department of Psychology, Boston College, Boston, MA, US. Release Date: 20130318. Correction Date: 20130415. Publication Type: Book, (0200); Authored Book, (0240); . Media Covered: Print. ISBN: 0-465-02599-4, Hardcover, 0465025994; 978-0-465-02599-2, Hardcover, 9780465025992; 0-465-03791-7, PDF, 0465037917; 978-0-465-03791-9, PDF, 9780465037919. Language: English. Major Descriptor: Childhood Development; Childhood Play Behavior; Internal External Locus of Control; Learning Environment; Nontraditional Education. Minor Descriptor: Peer Relations; Problem Solving; Resilience (Psychological); School Learning; Schools; Student Engagement. Classification: Curriculum & Programs & Teaching Methods (3530) . Population: Human (10); . Age Group: Childhood (birth-12 yrs) (100) . Intended Audience: Psychology: Professional & Research (PS) . Tests & Measures: Rotter Internal External Locus of Control Scale; Taylor Manifest Anxiety Scale DOI: 10.1037/t00936-000; Minnesota Multiphasic Personality Inventory; Narcissistic Personality Inventory DOI: 10.1037/t00001-000; Interpersonal Reactivity Index DOI: 10.1037/t01093-000; . References Available: Y  
 KW - PsycInfo  
 KW - Unsupervised Play Addition  
 KW - school  
 KW - CHILDREN  
 KW - Play  
 KW - Learning  
 KW - Development

KW - life control  
 KW - Problem Solving  
 KW - Peers  
 KW - emotional resilience  
 KW - Childhood Development  
 KW - Childhood Play Behavior  
 KW - Internal External Locus of Control  
 KW - Learning Environment  
 KW - Nontraditional Education  
 KW - Peer Relations  
 KW - Resilience (Psychological)  
 KW - School Learning  
 KW - Schools  
 KW - Student Engagement  
 RP - NOT IN FILE  
 CY - New York, NY US  
 PB - Basic Books

N2 - (from the jacket) Our children spend their days being passively instructed, and made to sit still and take tests-often against their will. We call this imprisonment schooling, yet wonder why kids become bored and misbehave. Even outside of school children today seldom play and explore without adult supervision, and are afforded few opportunities to control their own lives. The result: anxious, unfocused children who see schooling-and life-as a series of hoops to struggle through. In *Free to Learn*, developmental psychologist Peter Gray argues that our children, if free to pursue their own interests through play, will not only learn all they need to know but will do so with energy and passion. Children come into this world burning to learn, equipped with the curiosity, playfulness, and sociability to direct their own education. Yet we have squelched such instincts in a school model originally developed to indoctrinate, not to promote intellectual growth. To foster children who will thrive in today's constantly changing world, we must entrust them to steer their own learning and development. Drawing on evidence from anthropology, psychology, and history, Gray demonstrates that free play is the primary means by which children learn to control their lives, solve problems, get along with peers, and become emotionally resilient. This capacity to learn through play evolved long ago, in hunter-gatherer bands where children acquired the skills of the culture through their own initiatives. And these instincts still operate remarkably well today, as studies at alternative, democratically administered schools show. When children are in charge of their own education, they learn better-and at lower cost than the traditional model of coercive schooling. A brave, counterintuitive proposal for freeing our children from the shackles of the curiosity-killing institution we call school, *Free to Learn* suggests that it's time to stop asking what's wrong with our children, and start asking what's wrong with the system. It shows how we can act-both as parents and as members of society-to improve children's lives and promote their happiness and learning. (PsycINFO Database Record (c) 2013 APA, all rights reserved) (jacket)

SN - 0-465-02599-4

UR - <http://search.ebscohost.com/login.aspx?direct=true&db=psych&AN=2012-32884-000&site=ehost-live>

ER -

TY - JOUR

ID - 1683

T1 - Refugee and asylum seeker children

A1 - Bhugra,Dinesh

Y1 - 2012/05//

KW - PsycInfo

KW - Unsupervised Play Addition

KW - Refugees

KW - asylum seeking children

KW - health needs

KW - Child Welfare

KW - Health Service Needs

KW - Mental Health

KW - Physical Health

KW - Psychiatric Hospitals

RP - NOT IN FILE

SP - 1

EP - 2

JF - Arab Journal of Psychiatry

VL - 23

IS - 1

CY - Jordan

PB - Arab Federation of Psychiatrists

N2 - There are several million refugees across the globe. Children and adolescent refugees and asylum seekers, especially if they are unaccompanied, have specific needs to ensure that their mental health is preserved.

Political reasons, war, religious factors, gender and sexual orientation may all play a role in creating 'push' factors for these individuals to migrate to other countries. They have specific physical and mental health needs.

Policy makers need to get the right advice from psychiatrists who are also important in clinical assessment and management of these individuals. Clinicians can play a significant role in caring for such a vulnerable group.

(PsycINFO Database Record (c) 2012 APA, all rights reserved) (journal abstract)

SN - 1016-8923

AD - Bhugra, Dinesh, Health Service and Population Research Department, Institute of Psychiatry, King's College London De Crespigny Park, London, United Kingdom, SE5 8AF, dinesh.bhugra@kcl.ac.uk

UR - <http://search.ebscohost.com/login.aspx?direct=true&db=psyh&AN=2012-22033-001&site=ehost-live;dinesh.bhugra@kcl.ac.uk>

ER -

TY - JOUR

ID - 1684

T1 - Commentary on Patrizio Campanile's 'I had twenty-five piercings and pink hair when...'

A1 - Imber,Ruth

Y1 - 2012/04//

KW - PsycInfo

KW - Unsupervised Play Addition

KW - Adolescent Development

KW - transformative experience

KW - Subjectivity

KW - transitional hysteria

KW - Psychoanalysis

KW - Personality Development

KW - Hysteria

KW - Life Changes

KW - Experiences (Events)

RP - NOT IN FILE

SP - 429

EP - 436

JF - The Psychoanalytic Quarterly

VL - 81

IS - 2

CY - US

PB - Psychoanalytic Quarterly

N2 - Comments on an article by Patrizio Campanile (see record 2012-16795-006). Campanile's engaging article is a useful contribution to building cross cultural bridges. Campanile's paper is concerned with the psychic strains and conflicts often encountered in successfully navigating the challenges of attaining adolescence. His main clinical presentation is a dramatic description of a pubescent 12 year old girl entangled in the arduous task of leaving childhood and entering young adulthood. The methodology presented illustrates the author's eagerness to make swift and timely use of what he suspects are the unconscious dynamics at play for the patient, without a long, drawn-out exploration of the process by which she arrived at her current condition. From my analytic "subcultural" viewpoint which, embedded in it as I am, I believe to be progressive and valid-there is too much emphasis here on the idea of discrete stages and less on the fluid back and forth that is more likely to

characterize our investment in self and other throughout our lives. While I doubt that Campanile would disagree with this belief in fluidity, his adherence to the language of libido and narcissism lends itself to what to me seems an outmoded way of viewing psychic life. There is some irony in this as I also believe that there is much in his work as described here that is quite up to date and clinically useful. (PsycINFO Database Record (c) 2013 APA, all rights reserved)

SN - 2167-4086

AD - Imber, Ruth, 451 West End Avenue, Suite 1-J, New York, NY, US, 10024, rimerphd@aol.com

UR - <http://search.ebscohost.com/login.aspx?direct=true&db=psych&AN=2012-16795-008&site=ehost-live;rimerphd@aol.com>

L3 - 10.1002/j.2167-4086.2012.tb00500.x

ER -

TY - THES

ID - 1685

T1 - The effect of music on transitions and spoken redirections in a preschool classroom

A1 - Gadberry, David L.

Y1 - 2012///

N1 - Accession Number: 2012-99050-194. First Author & Affiliation: Gadberry, David L.; U Kansas, US.

Other Journal Titles: Dissertation Abstracts International. Release Date: 20120528. Publication Type:

Dissertation Abstract, (0400); . Media Covered: Electronic. Document Type: Dissertation. Dissertation Number:

AAI3458216. ISBN: 978-1-124-69859-5, 9781124698595. Language: English. Major Descriptor: Classrooms;

Music; Preschool Education; Teachers; Training. Classification: Educational Psychology (3500) . Population:

Human (10); . Age Group: Adulthood (18 yrs & older) (300) . Methodology: Empirical Study; Quantitative

Study. Page Count: 1

KW - PsycInfo

KW - Unsupervised Play Addition

KW - preschool classroom

KW - Teachers

KW - music education training

KW - Classrooms

KW - Music

KW - Preschool Education

KW - Training

RP - NOT IN FILE

JF - Dissertation Abstracts International Section A: Humanities and Social Sciences

VL - 72

IS - 9-A

CY - US

PB - ProQuest Information & Learning

N2 - The purpose of this study was to investigate the effect of music on transition duration for preschool-age children. Particularly, the focus was on transitioning between a preferred activity to a non-preferred activity, which was free play to cleaning up the toys from free play. Classroom teachers, without formal music education training, were given instruction in using musical transitions with both live and recorded music. Teachers were recorded singing without accompaniment for use during the recorded music treatment, and the teachers provided unaccompanied singing during the live music treatment. An ABAC reversal design was used to examine the baseline measurements (A) and the music treatments (B, C). Three classes were observed and treated using a single case design. Data collection consisted of the overall length of the transition in sections and behavioral differences for the teachers, which were the number of spoken redirections. The data concerning the first research question, whether there were differences in the transition lengths between the baseline and music conditions were shortest during the live music treatment in two of the three classrooms. The data addressing the second research question, which was whether there were differences in the number of spoken redirections, also showed the fewest redirections during the music treatments in two of the three classes. Of these two, one exhibited the fewest redirections during the recorded music treatment, and the other exhibited the fewest redirections during the live music treatment. (PsycINFO Database Record (c) 2012 APA, all rights reserved)

SN - 0419-4209

UR - <http://search.ebscohost.com/login.aspx?direct=true&db=psych&AN=2012-99050-194&site=ehost-live>

ER -

TY - THES

ID - 1686

T1 - Intergenerational transmission of health-promoting behaviors: Examining participation in physical activity between middle-aged mothers and their younger adult children

A1 - Stahl, Sarah T.

Y1 - 2012///

N1 - Accession Number: 2012-99120-332. First Author &amp; Affiliation: Stahl, Sarah T.; West Virginia U., US.

Other Journal Titles: Dissertation Abstracts International. Release Date: 20120827. Publication Type:

Dissertation Abstract, (0400); . Media Covered: Electronic. Document Type: Dissertation. Dissertation Number:

AAI3476509. ISBN: 978-1-124-89735-6, 9781124897356. Language: English. Major Descriptor: Age

Differences; Exercise; Health Promotion; Physical Activity; Transgenerational Patterns. Minor Descriptor:

Mothers. Classification: General Psychology (2100) . Population: Human (10); Female (40); . Location: US.

Age Group: Adulthood (18 yrs &amp; older) (300) Young Adulthood (18-29 yrs) (320) Thirties (30-39 yrs) (340)

Middle Age (40-64 yrs) (360) . Methodology: Empirical Study; Quantitative Study. Page Count: 1

KW - PsycInfo

KW - Unsupervised Play Addition

KW - intergenerational transmission

KW - health promoting behavior

KW - Physical Activity

KW - middle aged mothers

KW - younger adult children

KW - Age Differences

KW - Exercise

KW - Health Promotion

KW - Transgenerational Patterns

KW - Mothers

RP - NOT IN FILE

JF - Dissertation Abstracts International: Section B: The Sciences and Engineering

VL - 72

IS - 12-B

CY - US

PB - ProQuest Information &amp; Learning

N2 - Research has provided considerable evidence that participation in regular physical activity is associated with numerous physical and mental health benefits (Penedo & Dahn, 2005). Despite public health efforts to increase the activity levels adults, only 25% of the U.S. adult population is regularly active and nearly 60% remains sedentary (US Department of Health and Human Services [USDHHS], 2008). A small, but growing, area of research has examined physical activity from an intergenerational or dyadic perspective that considers how involvements in close, personal relationships influence levels of physical activity. In a sample of middle-aged mothers and their younger adult children, the present study had three primary objectives: (a) to examine the relations among well-known predictors of physical activity in younger adulthood and midlife, (b) to examine the relations between individual characteristics and interpersonal variables on physical activity within mother-child dyads, and (c) to examine whether mothers influenced their daughters more strongly than their sons. Data from 48 mother-child dyads between the ages of 18 and 57 were collected via an online survey. Findings from the first research objective indicate an adequate fit of the model to the data for middle-aged mothers ( $F(2, 48) = 2.938, p = .230$ ) and younger adults ( $F(3, 48) = .288, p = .962$ ). With regard to the second research objective, results indicated an adequate fit of the model to the data ( $F(6, 48) = 5.057, p = .537$ ). The hypothesized model explained 2.4% of variance in younger adults' physical activity and 17.5% of variance in middle-aged mothers' physical activity. In addition, standardized beta weights provided support for one actor effect, as mothers' internal health locus of control was positively associated with physical activity. ( $\beta = .42$ ). Research objective three was not supported. Findings from this study may help inform the design of future health interventions. Specifically, the results suggest that personal relationships, such as the relationship one has with a family member, may play a role in understanding participation in physical activity. (PsycINFO Database Record (c) 2012 APA, all rights reserved)

SN - 0419-4217



UR - <http://search.ebscohost.com/login.aspx?direct=true&db=psych&AN=2012-99120-332&site=ehost-live>  
ER -

TY - JOUR

ID - 1687

T1 - Integrating intention and context: Assessing social cognition in adults with Asperger syndrome

A1 - Baez,Sandra

A1 - Rattazzi,Alexia

A1 - Gonzalez-Gadea,Mar a L.

A1 - Torralva,Teresa

A1 - Vigliecca,Nora Silvana

A1 - Decety,Jean

A1 - Manes,Facundo

A1 - Ibanez,Agustin

Y1 - 2012/11//

KW - PsycInfo

KW - Unsupervised Play Addition

KW - integrating intention

KW - Social Cognition

KW - Asperger syndrome

KW - theory of mind

KW - Executive Function

KW - Aspergers Syndrome

KW - Intention

RP - NOT IN FILE

JF - Frontiers in Human Neuroscience

VL - 6

CY - Switzerland

PB - Frontiers Research Foundation

U1 - Sponsor: CONICET, FONDECYT. Grant: 1130920. Recipients: No recipient indicated;Sponsor: INECO Foundation. Recipients: No recipient indicated

N2 - Deficits in social cognition are an evident clinical feature of the Asperger syndrome (AS). Although many daily life problems of adults with AS are related to social cognition impairments, few studies have conducted comprehensive research in this area. The current study examined multiple domains of social cognition in adults with AS assessing the executive functions (EF) and exploring the intra and inter-individual variability. Fifteen adult's diagnosed with AS and 15 matched healthy controls completed a battery of social cognition tasks. This battery included measures of emotion recognition, theory of mind (ToM), empathy, moral judgment, social norms knowledge, and self-monitoring behavior in social settings. We controlled for the effect of EF and explored the individual variability. The results indicated that adults with AS had a fundamental deficit in several domains of social cognition. We also found high variability in the social cognition tasks. In these tasks, AS participants obtained mostly subnormal performance. EF did not seem to play a major role in the social cognition impairments. Our results suggest that adults with AS present a pattern of social cognition deficits characterized by the decreased ability to implicitly encode and integrate contextual information in order to access to the social meaning. Nevertheless, when social information is explicitly presented or the situation can be navigated with abstract rules, performance is improved. Our findings have implications for the diagnosis and treatment of individuals with AS as well as for the neurocognitive models of this syndrome. (PsycINFO Database Record (c) 2013 APA, all rights reserved) (journal abstract)

SN - 1662-5161

AD - Ibanez, Agustin, Laboratory of Experimental Psychology and Neuroscience, Institute of Cognitive Neurology Pacheco de Melo 1860, 1860, Buenos Aires, Argentina, aibanez@ineco.org.ar

UR - <http://search.ebscohost.com/login.aspx?direct=true&db=psych&AN=2012-33123-001&site=ehost-live>;aibanez@ineco.org.ar

L3 - 10.3389/fnhum.2012.00302

ER -

TY - CHAP

ID - 1688

T1 - Developing motivation through peer interaction: A cross-cultural analysis

A1 - Medina,Jose Sanchez

A1 - Martinez, Virginia

Y1 - 2012///

N1 - Accession Number: 2011-27520-006. First Author & Affiliation: Medina, Jose Sanchez. Release Date: 20120312. Publication Type: Book, (0200); Edited Book, (0280); . Media Covered: Print. Document Type: Chapter. ISBN: 978-0-521-76742-2, Hardcover, 9780521767422. Language: English. Major Descriptor: Childhood Development; Childhood Play Behavior; Motivation; Peer Relations; Psychological Development. Minor Descriptor: Conflict Resolution; Cross Cultural Differences; Culture (Anthropological); History; Preschool Students; Psychological Theories; Social Values; Socialization; Sociocultural Factors; Vygotsky (Lev). Classification: Developmental Psychology (2800) . Population: Human (10); Male (30); . Age Group: Childhood (birth-12 yrs) (100) Preschool Age (2-5 yrs) (160) . Intended Audience: Psychology: Professional & Research (PS) . References Available: Y.. Page Count: 18

KW - PsycInfo

KW - Unsupervised Play Addition

KW - Psychological Development

KW - Motivation

KW - Peers

KW - interactions

KW - Culture

KW - Play

KW - CHILDREN

KW - motives

KW - History

KW - Theories

KW - Vygotsky

KW - values

KW - Cultural Differences

KW - Research

KW - pre-schoolers

KW - Conflict Resolution

KW - socialisation

KW - Childhood Development

KW - Childhood Play Behavior

KW - Peer Relations

KW - Cross Cultural Differences

KW - Culture (Anthropological)

KW - Preschool Students

KW - Psychological Theories

KW - Social Values

KW - SOCIALIZATION

KW - Sociocultural Factors

KW - Vygotsky (Lev)

RP - NOT IN FILE

SP - 97

EP - 114

T2 - Motives in children's development: Cultural-historical approaches

A2 - Hedegaard, Mariane

A2 - Edwards, Anne

A2 - Fler, Marilyn

CY - New York, NY US

PB - Cambridge University Press

N2 - (from the chapter) This chapter focuses on how peer interactions in play constitute a setting which contributes to the children's acquisition of motives. We also argue that the study of peer interactions can shed light on two gaps which persist in the explanation of psychological development within the cultural-historical

theory (Vygotsky, 1978; Wertsch, 1985). The first is that, although this theoretical approach has placed great emphasis on the social and cultural construction of psychological development, in this construction the role of adults such as caregivers and teachers is highlighted and that of peers has been neglected. The adults are seen as holding the keys to the cultural adult world, organising the interactions and regulating children's behaviours in ways which give access to the cultural system of values and cultural norms. The second gap is, as Stetsenko and Arievitch (2004) point out, that although the cultural-historical theory recognises the active role of individuals in the appropriation of tools and systems of motives and cultural values, it has paid much less attention to the active role of individuals in creating and changing culture itself. Hedegaard (2005, 2008) has shown that the child is not a passive participant in these exchanges. The position, the way of behaving, and the degree of engagement of children in everyday practices can transform the practices substantially, playing a leading role in how these practices are developed. By focusing on peer interaction without adult direct supervision, we are able to analyse the active role of children acting in a setting in which they take over the values and norms of the adult world. To illustrate this argumentation, we present a research on peer interaction in two different cultures. We will use Corsaro's (1997) concept of peer-cultures to analyse how children create and recreate the adult cultures in their interactions. The distinction between individualistic and collectivist cultures will be the backbone on which we will build our argument. Based on observational studies of pre-schoolers' behaviour during free playtime at school, we show that the way children play and resolve their conflicts reflects and recreates the society's motive system. We argue that peer interactions are a distinctive setting for socialisation and development in which children acquire the motives to act in relation to their adult world of reference.

(PsycINFO Database Record (c) 2012 APA, all rights reserved) (chapter)

SN - 978-0-521-76742-2

UR - <http://search.ebscohost.com/login.aspx?direct=true&db=psyh&AN=2011-27520-006&site=ehost-live>

ER -

TY - CHAP

ID - 1689

T1 - 'Please sir! Can I come out of the closet and into the classroom?': British low culture and representations of queer masculinities in education

A1 - Jachimiak, Peter Hughes

Y1 - 2012///

N1 - Accession Number: 2012-16023-013. First Author & Affiliation: Jachimiak, Peter Hughes; Cardiff School of Creative and Cultural Industries, University of Glamorgan, Wales. Translated Book Series Title: Explorations of educational purpose. Release Date: 20120820. Publication Type: Book, (0200); Edited Book, (0280); . Media Covered: Print. Document Type: Chapter. ISBN: 978-94-007-2551-5, Hardcover, 9789400725515; 978-94-007-2552-2, PDF, 9789400725522. Language: English. Major Descriptor: Homosexuality; Masculinity; Popular Culture; Schools; Television. Minor Descriptor: Classrooms. Classification: Mass Media Communications (2750) Sexual Behavior & Sexual Orientation (2980) . Population: Human (10); . Location: Great Britain. Intended Audience: Psychology: Professional & Research (PS) . References Available: Y.. Page Count: 21

KW - PsycInfo

KW - Unsupervised Play Addition

KW - British low culture

KW - queer masculinities

KW - Education

KW - Popular Culture

KW - cultural pedagogy

KW - Homosexuality

KW - Masculinity

KW - Schools

KW - Television

KW - Classrooms

RP - NOT IN FILE

SP - 225

EP - 245

VL - 21

T2 - Queer masculinities: A critical reader in education

A2 - Landreau, John C.

A2 - Rodriguez,Nelson M.

CY - New York, NY US

PB - Springer Science + Business Media

T3 - Explorations of educational purpose; Vol 21; 1875-4449 (Print);

N2 - (from the chapter) This proposed chapter considers representations of queer masculinities in popular culture as cultural pedagogy. As such, it aims to make explicit the pedagogical role of both the presence and, perhaps more importantly, the absence of queer masculinities in the cultural representations of schools, schooling, and schoolchildren. Offering quintessentially British case studies that possess global resonances, I intend to draw from what Leon Hunt (1998) refers to as "[b]ehind the school desk' fiction" (p. 75)-such as weekly comics and mass-market "pulp" novels-all illicitly read by schoolchildren during school hours. Additionally, this chapter will examine television sitcoms, dramas, films, and so on that are aimed at not only children and young adults but also adults and present (misrepresent even) the schoolchildren, schools, its environments, and ideologies. For example. Please Sir!, a highly popular ITV television series of the 1970s, now available via nostalgia-oriented Network DVD, or the more "honest" and "gritty" Grange Hill, recently decommissioned by the BBC after its 30-year run. Produced during an era when the low end of popular culture tended to be openly racist, sexist, and homophobic, this chapter insists that such texts, as per hegemonic cultural pedagogy, implicitly reproduce the heterosexual status quo, while simultaneously suppressing homosexuality. By examining the intersections between the categories/concepts of queer masculinities and education, the aim of this chapter (in line with the broader aims of this reader) is to propose an understanding of the range and layers of meanings and practices of those intersections as well as offering the possibility for imaginatively reconstructing the categories/concepts themselves. Indeed, this chapter encourages-instead of the unquestioned absence of queer masculinities from the classroom-the introduction of non-differential attitudes (while, at the same time, being appreciative of "difference"), not only within schools and schooling but, perhaps more importantly, cultural representations of education more generally. In turn, it is hoped that this will help to advance the meanings and/or practices of queer masculinity in education, especially as this plays out within the context of popular culture as a contested site of cultural pedagogy. (PsycINFO Database Record (c) 2012 APA, all rights reserved) (chapter)

SN - 978-94-007-2551-5

AD - Jachimiak, Peter Hughes, Cardiff School of Creative and Cultural Industries, University of Glamorgan , Wales, phjachim@glam.ac.uk

UR - <http://search.ebscohost.com/login.aspx?direct=true&db=psych&AN=2012-16023-013&site=ehost-live;phjachim@glam.ac.uk>

L3 - 10.1007/978-94-007-2552-2\_14

ER -

TY - JOUR

ID - 1690

T1 - The effects of a conversation prompt procedure on independent play

A1 - Conallen, Kevin

A1 - Reed, Phil

Y1 - 2012/01//

KW - PsycInfo

KW - Unsupervised Play Addition

KW - independent play

KW - conversation prompt procedure

KW - Teaching

KW - autism spectrum disorders

KW - Autism

KW - Pervasive Developmental Disorders

KW - Conversation

KW - Recreation

RP - NOT IN FILE

SP - 365

EP - 377

JF - Research in Autism Spectrum Disorders

VL - 6

IS - 1

CY - Netherlands

PB - Elsevier Science

N2 - This study used a multiple baseline design (ABCAD) to determine whether teaching children with autistic spectrum disorders (ASD) to tact private events would function as a conditioned reinforcer for teaching non-preferred play activities. In this study, 10 children, aged between 5.3 and 8.9 years of age, were taught to tact a set of private events (e.g., fun, bored, easy, hard) after engaging in selected preferred, and non-preferred, play activities. These 'typical' language exchanges were built into existing individual activity play schedules, and were designed to prompt a conversational unit after a play period of up to 10 min. This conversational unit was designed to serve as a conditioned reinforcer for the activity under observation. The results show that having access to a set of tacts for putatively private events could function as a conditioned reinforcer when teaching non-preferred play activities, reduced off-task play behavior, while revealing a measurable increase in spontaneous language, emitted both during the targeted play sessions. (PsycINFO Database Record (c) 2012 APA, all rights reserved) (journal abstract)

SN - 1750-9467

AD - Reed, Phil, Department of Psychology, Swansea University Singleton Park, Swansea, United Kingdom, SA2 8PP, P.Reed@swansea.ac.uk

UR - <http://search.ebscohost.com/login.aspx?direct=true&db=psyh&AN=2011-25855-043&site=ehost-live>;P.Reed@swansea.ac.uk

L3 - 10.1016/j.rasd.2011.06.010

ER -

TY - JOUR

ID - 1691

T1 - Park-based physical activity among children and adolescents

A1 - Floyd, Myron F.

A1 - Bocarro, Jason N.

A1 - Smith, William R.

A1 - Baran, Perver K.

A1 - Moore, Robin C.

A1 - Cosco, Nilda G.

A1 - Edwards, Michael B.

A1 - Suau, Luis J.

A1 - Fang, Kunsheng

Y1 - 2011/09//

KW - PsycInfo

KW - Unsupervised Play Addition

KW - Physical Activity

KW - Childhood Development

KW - Adolescent Development

KW - Environment

KW - Parks

KW - Recreation Areas

RP - NOT IN FILE

SP - 258

EP - 265

JA - American Journal of Preventive Medicine

VL - 41

IS - 3

CY - Netherlands

PB - Elsevier Science

N2 - Background: Availability of parks is associated with higher levels of physical activity among children and adolescents. Few studies examine actual park use and park-based physical activity in these populations.

Purpose: This study examined associations among individual, park, and neighborhood environmental characteristics and children's and adolescent's park-based physical activity. Methods: Data were collected in 2007 on 2712 children in 20 randomly selected parks in Durham NC. The System for Observing Play and

Recreation in Communities (SOPARC) provided measures of physical activity. Hierarchic regression analysis assessed associations among individual, park, and neighborhood environmental characteristics and children's park-based physical activity. Data were analyzed in 2010. Results: Of the 2712 children observed, 34.2% and 13.2% were engaged in walking or vigorous physical activity. Environmental features of parks were associated with activity levels whereas neighborhood characteristics were not. Physical activity was negatively associated with gender (girls) ( $p = 0.003$ ); presence of a parent ( $p < 0.0001$ ); presence of nonparental adult ( $p = 0.006$ ); and an interaction involving the 0-5 years age group and style of play ( $p = 0.017$ ). Higher level of physical activity was associated with presence of other active children ( $p < 0.0001$ ); courts (e.g., basketball); and an interaction between number of recreation facilities and formal activities ( $p = 0.004$ ). Conclusions: These social factors and design features should be considered in order to stimulate higher levels of park-based physical activity among children and adolescents. (PsycINFO Database Record (c) 2012 APA, all rights reserved) (journal abstract)  
SN - 0749-3797

AD - Floyd, Myron F., Department of Parks, Recreation and Tourism Management, North Carolina State University Biltmore Hall 4008J, Box 8004, Raleigh, NC, US, 27695-8004, mffloyd@ncsu.edu

UR - <http://search.ebscohost.com/login.aspx?direct=true&db=psyh&AN=2011-18803-006&site=ehost-live;mffloyd@ncsu.edu>

L3 - 10.1016/j.amepre.2011.04.013

ER -

TY - JOUR

ID - 1695

T1 - Social engagement leads 2-year-olds to overestimate others' knowledge

A1 - Moll, Henrike

A1 - Carpenter, Malinda

A1 - Tomasello, Michael

Y1 - 2011/05//

KW - PsycInfo

KW - Unsupervised Play Addition

KW - social engagement

KW - Knowledge Level

KW - playing behavior

KW - Interpersonal Interaction

KW - 2-year-old children

KW - Childhood Play Behavior

KW - Early Childhood Development

KW - Social Behavior

RP - NOT IN FILE

SP - 248

EP - 265

JF - Infancy

VL - 16

IS - 3

CY - United Kingdom

PB - Wiley-Blackwell Publishing Ltd.

N2 - Previous research has found that young children recognize an adult as being acquainted with an object most readily when the child and adult have previously engaged socially with that object together. In the current study, we tested the hypothesis that such social engagement is so powerful that it can sometimes lead children to overestimate what has been shared. After having shared two objects with an adult in turn, 2-year-old children played with a third object the adult could not see. In three out of four conditions, the adult remained co-present and/or communicated to the child while she played with the third object. Children falsely perceived the adult as being acquainted with the third object when she remained co-present (whether or not she also communicated) but not when she clearly terminated the interaction by disengaging and leaving. These results suggest that when young children are engaged with a co-present person they tend to overestimate the other's knowledge.

(PsycINFO Database Record (c) 2012 APA, all rights reserved) (journal abstract)

SN - 1532-7078

AD - Moll, Henrike, Department of Psychology, Max Planck Institute for Evolutionary Anthropology  
Deutscher Platz 6, 04103, Leipzig, Germany, moll@eva.mpg.de

UR - <http://search.ebscohost.com/login.aspx?direct=true&db=psych&AN=2011-07099-002&site=ehost-live;moll@eva.mpg.de>

L3 - 10.1111/j.1532-7078.2010.00044.x

ER -

TY - JOUR

ID - 1697

T1 - Evidence-based practices addressed in community-based children's mental health clinical supervision

A1 - Accurso, Erin C.

A1 - Taylor, Robin M.

A1 - Garland, Ann F.

Y1 - 2011/05//

KW - PsycInfo

KW - Unsupervised Play Addition

KW - child mental health services

KW - clinical supervision

KW - evidence-based care

KW - behavioral problems

KW - Clinical Practice

KW - Community Mental Health Services

KW - Professional Supervision

KW - Behavior Problems

KW - Evidence Based Practice

KW - Mental Health

RP - NOT IN FILE

SP - 88

EP - 96

JF - Training and Education in Professional Psychology

VL - 5

IS - 2

CY - US

PB - American Psychological Association

U1 - Sponsor: National Institutes of Health. Grant: F31MH083399. Recipients: Accurso, Erin C.; Sponsor: National Institutes of Health. Grant: R01MH66070. Recipients: Garland, Ann F.

N2 - Clinical supervision is the principal method of training for psychotherapeutic practice, however there is virtually no research on supervision practice in community settings. Of particular interest is the role supervision might play in facilitating implementation of evidence-based (EB) care in routine care settings. This study examines the format and functions of clinical supervision sessions in routine care, as well as the extent to which supervision addresses psychotherapeutic practice elements common to EB care for children with disruptive behavior problems, who represent the majority of patients served in publicly funded routine care settings. Supervisors (n = 7) and supervisees (n = 12) from four publicly funded community-based child mental health clinics reported on 130 supervision sessions. Supervision sessions were primarily individual in-person meetings lasting one hour. The most common functions included case conceptualization and therapy interventions. Coverage of practice elements common to EB treatments was brief. Despite the fact that most children presenting to public mental health services are referred for disruptive behavior problems, supervision sessions are infrequently focused on practice elements consistent with EB treatments for this population. Supervision is a promising avenue through which training in EB practices could be supported to improve the quality of care for children in community-based "usual care" clinics. (PsycINFO Database Record (c) 2012 APA, all rights reserved) (journal abstract)

SN - 1931-3926

AD - Accurso, Erin C., 3020 Children's Way, MC 5033, San Diego, CA, US, 92123, eaccurso@casrc.org

UR - <http://search.ebscohost.com/login.aspx?direct=true&db=psych&AN=2011-09655-006&site=ehost-live;eaccurso@casrc.org>

L3 - 10.1037/a0023537

ER -

TY - CHAP

ID - 1701

T1 - Behavioral treatment of autism

A1 - Kodak,Tiffany

A1 - Grow,Laura L.

Y1 - 2011///

N1 - Accession Number: 2011-22103-026. First Author & Affiliation: Kodak, Tiffany; Munroe-Meyer Institute, University of Nebraska Medical Center, Omaha, NE, US. Release Date: 20120402. Publication Type: Book, (0200); Edited Book, (0280); . Media Covered: Print. Document Type: Chapter. Book Type: Handbook/Manual. ISBN: 978-1-60918-468-1, Hardcover, 9781609184681; 978-1-60918-503-9, PDF, 9781609185039. Language: English. Major Descriptor: Autism; Developmental Disabilities; Early Intervention; Models; Special Education. Minor Descriptor: Adaptive Behavior; Behavior Problems; Childhood Development; Generalization (Learning); Intervention; Operant Conditioning; Pervasive Developmental Disorders; Reinforcement; Stimulus Control. Classification: Behavior Therapy & Behavior Modification (3312) Special & Remedial Education (3570) . Population: Human (10); . Location: US. Age Group: Childhood (birth-12 yrs) (100) Preschool Age (2-5 yrs) (160) School Age (6-12 yrs) (180) Adolescence (13-17 yrs) (200) . Intended Audience: Psychology: Professional & Research (PS) . Tests & Measures: Assessment of Basic Learning and Language Skills-Revised; Verbal Behavior Milestones Assessment and Placement Program; . References Available: Y.. Page Count: 15

KW - PsycInfo

KW - Unsupervised Play Addition

KW - autism spectrum disorders

KW - educational programming

KW - Early Intervention

KW - Adaptive Behavior

KW - reduce problem behavior

KW - Operant Conditioning

KW - Reinforcement

KW - stimulus control

KW - Generalization

KW - Models

KW - Autism

KW - Developmental Disabilities

KW - Special Education

KW - Behavior Problems

KW - Childhood Development

KW - Generalization (Learning)

KW - Intervention

KW - Pervasive Developmental Disorders

RP - NOT IN FILE

SP - 402

EP - 416

T2 - Handbook of applied behavior analysis

A2 - Fisher,Wayne W.

A2 - Piazza,Cathleen C.

A2 - Roane,Henry S.

CY - New York, NY US

PB - Guilford Press

N2 - (from the chapter) Autism spectrum disorders (ASDs) are pervasive developmental disorders that are evident in early childhood. The diagnosis of an ASD is based on specific diagnostic criteria established by the Diagnostic and Statistical Manual of Mental Disorders, and encompasses a number of disorders, including autism, Asperger's syndrome, Rett's disorder, childhood disintegrative disorder, and pervasive developmental disorder not otherwise specified. Early and intensive behavioral intervention (EIBI) is an approach to educational programming for children with ASDs. Intensive behavior intervention is characterized by a



comprehensive, hierarchically arranged curriculum implemented for several years, with the goal of improving the overall functioning level of the child. The procedures utilized to increase adaptive behavior and reduce problem behavior are based on principles of operant conditioning (e.g., reinforcement, stimulus control, generalization). Numerous learning opportunities are presented with carefully programmed instructional and reinforcement procedures. Multiple areas of functioning are targeted in a developmental sequence to improve several broad skill areas. Educational targets for EIBI programming often include preacademic and academic skills, language, social skills, and independent play skills, among others. A number of early intervention models based on the principles of ABA were developed to provide an educational curriculum for teaching individuals with ASDs. The models described below have demonstrated effectiveness in studies published in peer-reviewed journals, and have since been published as commercially available treatment manuals. Each model is reviewed in detail, followed by a description of key differences. Finally, recommendations are provided for integrating the models to maximize learning. (PsycINFO Database Record (c) 2012 APA, all rights reserved) (chapter)

SN - 978-1-60918-468-1

UR - <http://search.ebscohost.com/login.aspx?direct=true&db=psych&AN=2011-22103-026&site=ehost-live>

ER -

TY - CHAP

ID - 1702

T1 - Intellectual disabilities

A1 - Alexander,Katie

Y1 - 2011///

N1 - Accession Number: 2012-32980-009. First Author & Affiliation: Alexander, Katie; Model Asperger Program, Ivymount School, Inc., Rockville, MD, US. Release Date: 20130128. Correction Date: 20140120. Publication Type: Book, (0200); Edited Book, (0280); . Media Covered: Print. Document Type: Chapter. ISBN: 0-8036-1704-6, Hardcover, 0803617046; 978-0-8036-1704-9, Hardcover, 9780803617049. Language: English. Major Descriptor: Occupational Therapists; Occupational Therapy; Intellectual Development Disorder. Minor Descriptor: Developmental Disabilities; Drug Therapy; Environmental Effects; Human Sex Differences; Sociocultural Factors. Classification: Mental Retardation (3256) Occupational & Vocational Rehabilitation (3384) . Population: Human (10); . Intended Audience: Psychology: Professional & Research (PS) . References Available: Y.. Page Count: 12

KW - PsycInfo

KW - Unsupervised Play Addition

KW - intellectual disabilities

KW - Developmental Disabilities

KW - Occupational Therapists

KW - Occupational Therapy

KW - gender influences

KW - cultural influence

KW - medication

KW - environmental factors

KW - Intellectual Development Disorder

KW - Drug Therapy

KW - Environmental Effects

KW - Human Sex Differences

KW - Sociocultural Factors

RP - NOT IN FILE

SP - 111

EP - 122

T2 - Occupational therapy in mental health: A vision for participation

A2 - Brown,Catana

A2 - Stoffel, Virginia C.

CY - Philadelphia, PA US

PB - F A Davis

N2 - (from the chapter) Occupational therapists have the opportunity to work with individuals with developmental disabilities in many contexts. Because many developmental disabilities are identified early in life, occupational therapists working in early intervention are among the first to develop and share a

comprehensive understanding of a child. They work alongside the family and other caregivers to identify barriers to participation and, through client-centered intervention, foster optimal participation, minimize disability, and promote a solid foundation on which future progress can be built. Occupational therapists may also work in school or community settings, serving students later in childhood. The therapeutic process remains the same, but the social and task expectations of the many contexts in which children live, play, and learn shift as a child gets older. The transition from adolescence into adulthood presents a new context that is rich with opportunity to foster community participation. Occupational therapists who work in early childhood, school systems, and mental health are likely to serve an individual because of his or her developmental disability. However, an occupational therapist in settings such as physical rehabilitation may serve an individual with a developmental disability primarily due to physical impairment, for example, from trauma; in this case, the presence of an intellectual disability will have a significant affect on intervention decisions. In all cases, each individual with a developmental disability will have his or her own preferences, strengths, difficulties, expectations, and goals. This chapter highlights the heterogeneity of intellectual disabilities. Although the diagnosis is simple and straightforward, there are a multitude of causes and the resulting severity and impact on occupational functioning varies widely among people with intellectual disabilities. This chapter also provides information on the prevalence, gender- and culture-specific influences, medications, and environmental factors that affect occupational performance. (PsycINFO Database Record (c) 2014 APA, all rights reserved) (chapter) SN - 0-8036-1704-6

UR - <http://search.ebscohost.com/login.aspx?direct=true&db=psyh&AN=2012-32980-009&site=ehost-live>  
ER -

TY - JOUR

ID - 1704

T1 - Quantifying the effects of normal ageing on white matter structure using unsupervised tract shape modelling

A1 - Bastin,Mark E.

A1 - Muñoz Maniega,Susana

A1 - Ferguson,Karen J.

A1 - Brown,Laura J.

A1 - Wardlaw,Joanna M.

A1 - MacLullich,Alasdair M.J.

A1 - Clayden,Jonathan D.

Y1 - 2010/05//

KW - PsycInfo

KW - Unsupervised Play Addition

KW - normal aging

KW - white matter structure

KW - unsupervised tract shape modeling

KW - brain atrophy

KW - Magnetic Resonance Imaging

KW - tractography

KW - Aging

KW - Brain Size

KW - Corpus Callosum

KW - White Matter

KW - Cerebral Atrophy

KW - Cognitive Ability

RP - NOT IN FILE

SP - 1

EP - 10

JF - NeuroImage

VL - 51

IS - 1

CY - Netherlands

PB - Elsevier Science

U1 - Sponsor: Medical Research Council. Other Details: Clinician Scientist Fellowship. Recipients: Ferguson, Karen J.; MacLulich, Alasdair M. J.; Sponsor: Scottish Funding Council (SFC); Scotland. Other Details: Through the SINAPSE Collaboration (Scottish Imaging Network. A Platform for Scientific Excellence). Recipients: Wardlaw, Joanna M.; Sponsor: Medical Research Council, Centre for Cognitive Ageing and Cognitive Epidemiology. Recipients: No recipient indicated; Sponsor: National Institutes of Health; US. Grant: R01 EB004155-03. Recipients: No recipient indicated

N2 - Quantitative tractography may provide insights into regional heterogeneity of changes in white matter structure in normal ageing. Here we examine how brain atrophy and white matter lesions affect correlations between tract shape, tract integrity and age in a range of frontal and non-frontal tracts in 90 non-demented subjects aged over 65 years using an enhanced version of probabilistic neighbourhood tractography. This novel method for automatic single seed point placement employs unsupervised learning and streamline selection to provide reliable and accurate tract segmentation, whilst also indicating how the shape of an individual tract compares to that of a predefined reference tract. There were significant negative correlations between tract shape similarity to reference tracts derived from a young brain white matter atlas and age in genu and splenium of corpus callosum. Controlling for intracranial and lateral ventricle volume, the latter of which increased significantly with age, attenuated these correlations by 40% and 84%, respectively, indicating that this age-related change in callosal tract topology is significantly mediated by global atrophy and ventricular enlargement. In accordance with the "frontal ageing" hypothesis, there was a significant positive correlation between mean diffusivity (<D>) and age, and a significant negative correlation between fractional anisotropy (FA) and age in corpus callosum genu; correlations not seen in splenium. Significant positive correlations were also observed between <D> and age in bilateral cingulum cingulate gyri, uncinate fasciculi and right corticospinal tract. This pattern of correlations was not, however, reproduced when those subjects with significant white matter lesion load were analyzed separately from those without. These data therefore suggest that brain atrophy and white matter lesions play a significant role in driving regional patterns of age-related changes in white matter tract shape and integrity. (PsycINFO Database Record (c) 2012 APA, all rights reserved) (journal abstract)

SN - 1053-8119

AD - Bastin, Mark E., Medical and Radiological Sciences (Medical Physics), University of Edinburgh, Western General Hospital Crewe Road, Edinburgh, United Kingdom, EH4 2XU, Mark.Bastin@ed.ac.uk

UR - <http://search.ebscohost.com/login.aspx?direct=true&db=psych&AN=2010-05166-001&site=ehost-live>; Mark.Bastin@ed.ac.uk

L3 - 10.1016/j.neuroimage.2010.02.036

ER -

TY - THES

ID - 1706

T1 - The variable child: The vulnerabilities of children and youth in the Canadian refugee determination system

A1 - Ballucci, Dale

Y1 - 2010//

N1 - Accession Number: 2010-99110-152. First Author & Affiliation: Ballucci, Dale; U Alberta, Canada. Other Journal Titles: Dissertation Abstracts International. Release Date: 20100802. Publication Type: Dissertation Abstract, (0400); . Media Covered: Electronic. Document Type: Dissertation. Dissertation Number: AA1NR54034. ISBN: 978-0-494-54034-3, 9780494540343. Language: English. Major Descriptor: Decision Making; Legal Decisions; Refugees; Social Processes; Susceptibility (Disorders). Classification: Social Processes & Social Issues (2900) . Population: Human (10); . Location: Canada. Age Group: Childhood (birth-12 yrs) (100) . Methodology: Empirical Study; Quantitative Study. Page Count: 1

KW - PsycInfo

KW - Unsupervised Play Addition

KW - vulnerabilities

KW - Canadian refugee determination system

KW - legal decision-making

KW - Decision Making

KW - Legal Decisions

KW - Refugees

KW - Social Processes

KW - Susceptibility (Disorders)

RP - NOT IN FILE

JF - Dissertation Abstracts International Section A: Humanities and Social Sciences

VL - 70

IS - 12-A

CY - US

PB - ProQuest Information & Learning

N2 - The Variable Child concerns the legal decision-making process in unaccompanied child refugee applications, and the role that conceptions of childhood play in the process. I examine when particular types of knowledge are drawn upon by legal actors, as well as the effects of the claim-making practices that create meaning, or 'truth effects', in legal decision-making. I identify how legal actors exercise discretion by investigating how facts are constructed with different ideas about children's competence, abilities and knowledge. The "Unaccompanied Child Refugee Evidentiary and Procedure Guidelines", which governs legal decisions, has embedded within it various, sometimes competing, conceptions of the child and childhood. These multiple notions create considerable discretionary space for refugee officers to make decisions about individual cases. My examination of legal decisions reveals a strategic use of vulnerable and/or responsible conceptions of childhood. Another strategy used to establish facts in these cases is to exclude the cultural differences of childhood-both these practices are accomplished through employing several different knowledge moves. Refugee officers invoke vulnerable and/or responsible constructions of childhood to displace the impact of other/alternative constructions of childhood, namely Chinese ideas of parental relations. This avoids the potential for legal decisions to set standards for similar cases in the future. Childhood studies have documented how different axes of scholarly inquiry produce different understandings, typologies, and knowledges of the child and childhood. What remains understudied is how competing knowledges of the child and childhood are applied, negotiated, and formalized in legal decision-making. My study investigates how power relations constitute particular constructions of childhood, and the consequences these relations have for children's lives. Unlike examining childhood as contextual, I document how variable understandings of the child and childhood are constituted, institutionalized, and normalized through the law. My study examines the complexities of legal decision-making, a process that is often black-boxed. I also trace which conceptions of childhood are drawn upon to substantiate legal claims, and how a social context for the child and childhood emerges. By examining the relations of law in the context of children, my work contributes to the growing area of childhood studies and socio-legal practices. (PsycINFO Database Record (c) 2012 APA, all rights reserved)

SN - 0419-4209

UR - <http://search.ebscohost.com/login.aspx?direct=true&db=psych&AN=2010-99110-152&site=ehost-live>

ER -

TY - THES

ID - 1707

T1 - Teaching mothers to use promised consequences with their children

A1 - Owen, Daniela Jade

Y1 - 2010//

N1 - Accession Number: 2010-99180-196. First Author & Affiliation: Owen, Daniela Jade; State U New York at Stony Brook, US. Other Journal Titles: Dissertation Abstracts International. Release Date: 20101129.

Publication Type: Dissertation Abstract, (0400); . Media Covered: Electronic. Document Type: Dissertation.

Dissertation Number: AAI3399762. ISBN: 978-1-109-66304-4, 9781109663044. Language: English. Major

Descriptor: Dyads; Mother Child Relations; Mothers; Teaching. Classification: Social Psychology (3000) .

Population: Human (10); Female (40); . Age Group: Childhood (birth-12 yrs) (100) . Methodology: Empirical

Study; Quantitative Study. Page Count: 1

KW - PsycInfo

KW - Unsupervised Play Addition

KW - teaching mothers

KW - CHILDREN

KW - promised consequences

KW - Dyads

KW - child actions

KW - Mother Child Relations

KW - Mothers

KW - Teaching

RP - NOT IN FILE

JF - Dissertation Abstracts International: Section B: The Sciences and Engineering

VL - 71

IS - 3-B

CY - US

PB - ProQuest Information & Learning

N2 - Noncompliance in early childhood is the top reason why parents seek out mental health services for young children (Chamberlain & Smith, 2003; Schuhmann, Durning, Eyberg, & Boggs, 1996) and, if untreated, early childhood noncompliance has been found to develop into more profound problems (e.g., Campbell, 1991; McMahon, 1994). Promised consequences-consequences for noncompliance stated with a directive prior to child action-are associated with greater likelihood of child compliance (Owen, Slep, & Heyman, in press). Seventy-five mother-child dyads were recruited to participate in this promised consequences training study. Dyads were randomly assigned to a modeling only condition (MO), a modeling plus directed interaction condition (MDI), or a no training control condition (C). Mothers practiced using promised consequences during a 35-minute mother-child interaction, including a clean-up and an independent play period. Mothers in the two experimental conditions delivered promised consequences more than mothers in the control condition, and mothers in the MDI condition were more likely to follow through with promised consequences than mothers in the control condition. Children did not comply differently based on condition. Mothers in the training experimental conditions reported greater efficacy expectancies for their abilities to use promised consequences and greater outcome expectancies for their children's compliance with promise consequences than mothers in the control condition. Neither efficacy expectancies nor outcome expectancies mediated the relationship between condition and maternal use of promised consequences during the mother-child interaction. Promised consequences may be a beneficial disciplinary technique to add to parent training programs because it is both portable and adaptable to several situations. Teaching promised consequences by using a modeling plus directed interaction method is recommended for more complete learning in a brief training format. Further exploration of how promised consequences work and whether they offer a long term benefit are recommended. (PsycINFO Database Record (c) 2012 APA, all rights reserved)

SN - 0419-4217

UR - <http://search.ebscohost.com/login.aspx?direct=true&db=psych&AN=2010-99180-196&site=ehost-live>

ER -

TY - JOUR

ID - 1708

T1 - Subglottal resonances and distinctive features

A1 - Lulich, Steven M.

Y1 - 2010/01//

KW - PsycInfo

KW - Unsupervised Play Addition

KW - subglottal resonances

KW - distinctive features

KW - Phonetics

KW - vowels

KW - acoustics

KW - speech production

KW - Oral Communication

KW - Speech Characteristics

KW - Vibration

RP - NOT IN FILE

SP - 20

EP - 32

JF - Journal of Phonetics

VL - 38

IS - 1

CY - Netherlands

PB - Elsevier Science

U1 - Sponsor: National Institutes of Health; US. Grant: DC00075; T32DC000038. Recipients: No recipient indicated

N2 - This paper addresses the phonetic basis of the distinctive feature [ɾback]. The second subglottal resonance (Sg2) is known to fall near the boundary between [ʔback] and [+back] vowels, and it has been claimed that Sg2 actually defines this distinction. In this paper, new evidence in support of this hypothesis is presented from 14 adult and 9 child speakers of American English, in which accelerometer recordings of subglottal acoustics were made simultaneously with speech recordings. The first three formants and the second subglottal resonance were measured, and both Sg2 and F3-3.5 bark were tested as boundaries between front and back vowels in the F2-dimension. It was found that Sg2 provides a reliable boundary between front and back vowels for children of all ages, as well as for adults, whereas F3-3.5 bark provides a similarly reliable boundary only for older children and adults. Furthermore, a study of connected speech in one adult male indicated that Sg2 forms a boundary between front and back vowels in such speech as well as in laboratory speech. Some implications for quantal theory and landmark theory are discussed, as well as the possibility that subglottal resonances might play a broader role in speech production. (PsycINFO Database Record (c) 2012 APA, all rights reserved) (journal abstract)

SN - 0095-4470

AD - Lulich, Steven M., Speech Communication Group, MIT 77 Massachusetts Ave., Cambridge, MA, US, 02139, lulich@speech.mit.edu

UR - <http://search.ebscohost.com/login.aspx?direct=true&db=psych&AN=2010-04601-006&site=ehost-live;lulich@speech.mit.edu>

L3 - 10.1016/j.wocn.2008.10.006

ER -

TY - CHAP

ID - 1711

T1 - Social-cognitive models and skills

A1 - Erdley, Cynthia A.

A1 - Rivera, Michelle S.

A1 - Shepherd, Elizabeth J.

A1 - Holleb, Lauren J.

Y1 - 2010//

N1 - Accession Number: 2010-00310-002. First Author & Affiliation: Erdley, Cynthia A.; Department of Psychology, University of Maine, Orono, ME, US. Release Date: 20100329. Publication Type: Book, (0200); Edited Book, (0280); . Media Covered: Print. Document Type: Chapter. Book Type: Handbook/Manual. ISBN: 978-1-4419-0608-3, Paperback, 9781441906083; 978-1-4419-0609-0, PDF, 9781441906090. Language: English. Major Descriptor: Models; Social Cognition; Social Skills. Minor Descriptor: Intervention; Measurement; Psychosocial Development; Social Skills Training. Classification: Social Psychology (3000) Developmental Psychology (2800) . Population: Human (10); . Age Group: Childhood (birth-12 yrs) (100) Adolescence (13-17 yrs) (200) Adulthood (18 yrs & older) (300) . Intended Audience: Psychology: Professional & Research (PS) . References Available: Y.. Page Count: 15

KW - PsycInfo

KW - Unsupervised Play Addition

KW - social cognitive models

KW - social cognitive skills

KW - Social Behavior

KW - social skills intervention

KW - assessment

KW - Development

KW - Models

KW - Social Cognition

KW - Social Skills

KW - Intervention

KW - Measurement

KW - Psychosocial Development

KW - Social Skills Training

RP - NOT IN FILE

SP - 21

EP - 35

T2 - Practitioner's guide to empirically based measures of social skills

A2 - Nangle, Douglas W.

A2 - Hansen, David J.

A2 - Erdley, Cynthia A.

A2 - Norton, Peter J.

CY - New York, NY US

PB - Springer Publishing Co

N2 - (from the chapter) Researchers studying social competence have been interested not only in specific social skills but also in the types of social-cognitive processes that might underlie individuals' behavioral choices. A variety of theories propose that individual differences in social information processing skills may help explain why people confronted with the same social situation may choose to act in very different ways. For example, two children may be teased by a peer. One child may perceive this as harmless play and may laugh, whereas another child may interpret this as mean and threatening and may choose to act aggressively toward the peer. Many theorists (e.g., Crick & Dodge, 1994; Dodge, 1986; Ladd & Crick, 1989; Lemerise & Arsenio, 2000) suggest that distortions or deficiencies in social information processing may lead to maladaptive behavior. Thus, in addition to focusing on improving specific social behaviors in social skills intervention programs, it seems that social-cognitive variables can be an important target for treatment as well (e.g., Guerra & Slaby, 1990; Hudley & Graham, 1993). In fact, social-cognitive processes can be viewed as social skills themselves (see Chapter 1, for further discussion). In this chapter, several social-cognitive models will be reviewed and the ways in which social-cognitive variables have been assessed in children, adolescents, and adults will be presented. (PsycINFO Database Record (c) 2012 APA, all rights reserved) (chapter)

SN - 978-1-4419-0608-3

AD - Erdley, Cynthia A., Department of Psychology, University of Maine 5742 Little Hall, Orono, ME, US, 04469, [cynthia.erdley@umit.maine.edu](mailto:cynthia.erdley@umit.maine.edu)

UR - <http://search.ebscohost.com/login.aspx?direct=true&db=psyh&AN=2010-00310-002&site=ehost-live>; [cynthia.erdley@umit.maine.edu](mailto:cynthia.erdley@umit.maine.edu)

L3 - 10.1007/978-1-4419-0609-0\_2

ER -

TY - CHAP

ID - 1712

T1 - Links between children's independent mobility, active transport, physical activity and obesity

A1 - Whitzman, Carolyn

A1 - Romero, Vivian

A1 - Duncan, Mitch

A1 - Curtis, Carey

A1 - Tranter, Paul

A1 - Burke, Matthew

Y1 - 2010//

N1 - Accession Number: 2010-10942-013. First Author & Affiliation: Whitzman, Carolyn; Planning Institute of Australia, Australia. Translated Book Series Title: BMJ books. Release Date: 20110905. Publication Type: Book, (0200); Edited Book, (0280); . Media Covered: Print. Document Type: Chapter. ISBN: 978-1-4051-5889-3, Paperback, 9781405158893; 978-1-4443-1852-4, PDF, 9781444318524. Language: English. Major Descriptor: Childhood Development; Environmental Psychology; Obesity; Physical Mobility; Public Health. Minor Descriptor: Public Transportation. Classification: Promotion & Maintenance of Health & Wellness (3365) . Population: Human (10); . Age Group: Childhood (birth-12 yrs) (100) . Intended Audience: Psychology: Professional & Research (PS) . References Available: Y.. Page Count: 8

KW - PsycInfo

KW - Unsupervised Play Addition

KW - children's independent mobility

KW - child obesity rates

KW - environmental psychology

KW - transportation planning

KW - social geography

KW - Public Health

KW - Childhood Development

KW - Obesity  
 KW - Physical Mobility  
 KW - Public Transportation  
 RP - NOT IN FILE  
 SP - 105  
 EP - 112  
 T2 - Preventing childhood obesity: Evidence, policy, and practice  
 A2 - Waters,Elizabeth  
 A2 - Swinburn,Boyd  
 A2 - Seidell,Jacob  
 A2 - Uauy,Ricardo  
 PB - Wiley-Blackwell  
 T3 - BMJ books  
 N2 - (from the chapter) Children's independent mobility means the freedom of those under 18 years to move around in public spaces without adult accompaniment. The phrases "battery reared" and "free range" refer to two diametrically opposed approaches to children's upbringing. "Free range" children have traditionally been allowed, and indeed expected, to walk, cycle, or take public transport on their own for everyday trips between home, school, parks, shops and friends' houses. They have also been allowed, in previous generations, to independently explore their immediate neighborhood and the broader city with increasing confidence as they mature. Internationally, the past 40 years have seen a number of inter-related trends: radically declining levels of children's independent mobility (CIM), increased parental use of cars to transport children to school and play, decreasing everyday physical activity of both children and adults, and increasing child obesity rates. There is a relatively small and recent interdisciplinary research on children's independent mobility, primarily reflecting the disciplines of transportation planning, social geography, environmental psychology and public health. The purpose of this chapter is to explore the links between these various phenomena, to detail the complex factors behind these trends, and to examine policy changes that show promise in addressing these interrelated problems. It draws on research published in English, most of which has been conducted in Western Europe, North America and Australasia. Research websites (e.g., Active Living Research, health-evidence.ca, UNESCO Child Friendly Cities) were searched for additional literature regarding promising policies and practices. (PsycINFO Database Record (c) 2012 APA, all rights reserved) (chapter)  
 SN - 978-1-4051-5889-3  
 UR - <http://search.ebscohost.com/login.aspx?direct=true&db=psych&AN=2010-10942-013&site=ehost-live>  
 L3 - 10.1002/9781444318517.ch13  
 ER -  
  
 TY - JOUR  
 ID - 1713  
 T1 - Çocukluktan eri?kinli?e obsesif kompulsif bozuklukta hatali De?erlendirme ve inanç alanlari  
 A1 - Pi?gin,?rem  
 A1 - <sup>TM</sup>zen,Dilek  
 Y1 - 2010///  
 KW - PsycInfo  
 KW - Unsupervised Play Addition  
 KW - faulty appraisals  
 KW - belief domains  
 KW - Obsessive Compulsive Disorder  
 KW - developmental periods  
 KW - cognitive control model  
 KW - Attitudes  
 KW - Cognitive Appraisal  
 KW - Developmental Stages  
 KW - Cognitive Control  
 RP - NOT IN FILE  
 SP - 117  
 EP - 131  
 JF - Psikiyatride G • ncel Yakla??mlar



VL - 2

IS - 1

CY - Turkey

PB - Cukurova University Faculty of Medicine

N2 - Among cognitive models attempting to explain the etiology of Obsessive Compulsive Disorder (OCD), models such as Inflated Responsibility Model, Misinterpretation of Significance Theory and Cognitive Control Model are currently considered to be valid in many aspects in understanding adulthood OCD. Embracing these models that underline various cognitions in adult OCD, the presence of six faulty appraisals and belief domains can be noticed: inflated responsibility; overimportance of thoughts; excessive concern about the importance of controlling one's thoughts, overestimation of threat, intolerance of uncertainty and perfectionism. Previous studies indicated a difference between early onset OCD and late onset OCD with regards to the presence of pure compulsions, insidious onset of symptoms. Examining faulty assessment and belief domains related with OCD reveals that overimportance of thoughts, intolerance of uncertainty and perfectionism is not only limited to adulthood, but also observed during childhood and/or adolescence periods. Nevertheless, inflated responsibility, excessive concern about the importance of controlling one's thoughts and overestimation of threat found in childhood and adolescence period is not as pronounced and striking as observed with adults. Considering the facts that OCD symptoms and related areas of faulty appraisals and belief domains differ amongst various age groups, early diagnosis and intervention will be critical in terms of the course of treatment for obsessive compulsive disorder. The purpose of this review is to briefly examine three current cognitive models proposed for OCD and evaluate six faulty appraisals and belief domains considered to play a role in the understanding of OCD with respect to developmental periods. (PsycINFO Database Record (c) 2012 APA, all rights reserved) (journal abstract)

SN - 1309-0674

AD - Pişgin, İrem, Buyuk Camlica Cad. 23/3 Kisikli-Uskudar, Istanbul, Turkey, irempisgin@hotmail.com

UR - <http://search.ebscohost.com/login.aspx?direct=true&db=psyh&AN=2011-16920-007&site=ehost-live>;irempisgin@hotmail.com

ER -

TY - JOUR

ID - 1714

T1 - Patterns of home- and classroom-based toy play of preschoolers with and without intellectual disabilities

A1 - Malone, Michael

Y1 - 2009/12//

KW - PsycInfo

KW - Unsupervised Play Addition

KW - home based toy play

KW - classroom-based toy play

KW - preschoolers

KW - intellectual disabilities

KW - Mental Retardation

KW - Childhood Play Behavior

KW - Classroom Behavior

KW - Preschool Students

KW - Toys

KW - Intellectual Development Disorder

RP - NOT IN FILE

SP - 333

EP - 347

JF - International Journal of Disability, Development and Education

VL - 56

IS - 4

CY - United Kingdom

PB - Taylor &amp; Francis

N2 - Children with and without intellectual disabilities were observed playing with toys during both home-based independent play and classroom-based freeplay situations. Categorical and sequential play was analysed for within- and between-group patterns. Within-group patterns during classroom freeplay were similar for both

groups. There were no significant differences among home-based categorical play variables for children with intellectual disabilities; however, children without intellectual disabilities engaged in significantly more constructive play than other home-based categorical play types. Between-group analyses of home-classroom difference scores revealed greater variability in play for children with intellectual disabilities than children without intellectual disabilities. The analyses presented complement and extend extant work on contextually-based variation of children's toy play supporting a more positive ability profile for children with intellectual disabilities than that engendered by classroom-based observations. Results have implications for (a) perceptions of and attitudes toward children with intellectual disabilities held by stakeholders, and (b) how intervention targets are determined. (PsycINFO Database Record (c) 2012 APA, all rights reserved) (journal abstract)

SN - 1465-346X

AD - Malone, Michael, College of Education, University of Cincinnati, Cincinnati PO Box 210105, Cincinnati, OH, US, 45221-0105, d.michael.malone@uc.edu

UR - <http://search.ebscohost.com/login.aspx?direct=true&db=psyh&AN=2009-22197-003&site=ehost-live;d.michael.malone@uc.edu>

L3 - 10.1080/10349120903306558

ER -

TY - JOUR

ID - 1715

T1 - Review of 'Children at play: An American history'

A1 - Benzaqu, n, Adriana S.

Y1 - 2009///

KW - PsycInfo

KW - Unsupervised Play Addition

KW - Childhood Play Behavior

KW - American history

KW - Childhood Development

KW - History of Psychology

RP - NOT IN FILE

SP - 75

EP - 77

JF - Journal of the History of the Behavioral Sciences

VL - 45

IS - 1

CY - US

PB - John Wiley & Sons

N2 - Reviews the book, "Children at play: An American history" by Howard P. Chudacoff (see record 2007-12982-000). Howard P. Chudacoff's history of children's play in the United States since colonial times is largely motivated by his concern about the state of play and childhood in the present. In seven chapters-one covering the period 1600-1800, one on each half of the nineteenth century, two chapters on the first half of the twentieth century, and two on the period from 1950 to the present-the book develops two arguments. The first argument has to do with the very definition of play, which, the author claims, means different things for adults and for children. The second argument is historical: After a "golden age" in the first half of the twentieth century, unstructured, independent play has become increasingly rare, primarily as a result of tightening adult control, extensive commercialization, and anxiety about children's safety and future. Chudacoff's conclusion is that despite many present scholars' and cultural critics' worries regarding the state of children's play, "the long view of history suggests that things are never as bad, or as good, as they may seem". (PsycINFO Database Record (c) 2012 APA, all rights reserved)

SN - 1520-6696

UR - <http://search.ebscohost.com/login.aspx?direct=true&db=psyh&AN=2009-01075-013&site=ehost-live>

L3 - 10.1002/jhbs.20356

ER -

TY - JOUR

ID - 1716

T1 - Sleep polygraphic study of children and adolescents with narcolepsy/cataplexy

A1 - Ferri,Raffaele  
 A1 - Franceschini,Christian  
 A1 - Zucconi,Marco  
 A1 - Drago,Valeria  
 A1 - Manconi,Mauro  
 A1 - Vandi,Stefano  
 A1 - Poli,Francesca  
 A1 - Bruni,Oliviero  
 A1 - Plazzi,Giuseppe

Y1 - 2009/09//

KW - PsycInfo

KW - Unsupervised Play Addition

KW - sleep polygraphs

KW - CHILDREN

KW - Adolescents

KW - narcolepsy

KW - cataplexy

KW - rapid eye movement sleep

KW - non rapid eye movement sleep

KW - cyclic alternating pattern

KW - NREM Sleep

KW - Polygraphs

KW - Rapid Eye Movement

KW - Persistence

KW - Sleep

KW - Sleep Wake Cycle

RP - NOT IN FILE

SP - 523

EP - 538

JF - Developmental Neuropsychology

JA - Dev Neuropsychol

VL - 34

IS - 5

CY - United Kingdom

PB - Taylor & Francis

N2 - The alterations of the Cyclic Alternating Pattern (CAP) recently found in narcoleptic adult patients suggest the presence of an impaired modulation of the fluctuations of the arousal level during their non-rapid eye movement (NREM) sleep, possibly because of the persistence of neurophysiological mechanisms typical of rapid eye movement (REM) sleep. The same mechanism might play a role in the occurrence of leg movement (LM) activity during sleep characterized by low levels of periodicity. The aim of this study was to evaluate CAP and sleep LM activity in a group of children and adolescents with narcolepsy, to interpret the results under a developmental point of view and integrate this new information with data already available for adults. Thirteen young patients with narcolepsy/ cataplexy were consecutively recruited for this study, together with 13 age- and sex-matched normal controls. Nocturnal polysomnography was carried out after a night of adaptation in a sleep laboratory room; sleep stages, CAP, and LMs were scored and evaluated following standard criteria. Narcoleptic patients showed shorter sleep onset and REM sleep latency, higher number of stage shifts and awakenings per hour of sleep, and higher percentage of wakefulness after sleep onset; CAP rate was found to be decreased in all NREM sleep stages (in particular CAP A1 subtypes) in narcoleptic patients who also showed significant higher values of all types of LMs (periodic or isolated), during both REM and NREM sleep; however, the most evident differences were found during REM sleep. The results of this study confirm that the sleep microstructure and LM activity changes observed in adulthood are already present and detectable in childhood and might have a role in the already known impaired prefrontal functioning of these subjects. The well-established orexin deficiency might be the unifying factor playing a major role in the modulation of CAP and LMs during sleep in children and adolescents with narcolepsy/cataplexy. (PsycINFO Database Record (c) 2012 APA, all rights reserved) (journal abstract)

SN - 1532-6942

AD - Ferri, Raffaele, Sleep Research Centre, Department of Neurology I.C., Oasi Institute for Research on Mental Retardation and Brain Aging (IRCCS) Via C. Ruggero 73, 94018, Troina, Italy, rferri@oasi.en.it  
UR - <http://search.ebscohost.com/login.aspx?direct=true&db=psyh&AN=2010-11445-002&site=ehost-live;rferri@oasi.en.it>  
L3 - 10.1080/87565640903133699  
ER -

TY - JOUR

ID - 1717

T1 - Children discover the spectral skeletons in their native language before the amplitude envelopes

A1 - Nittrouer, Susan

A1 - Lowenstein, Joanna H.

A1 - Packer, Robert R.

Y1 - 2009/08//

KW - PsycInfo

KW - Unsupervised Play Addition

KW - Speech Perception

KW - sine wave speech

KW - children's speech perception

KW - perceptual object formation

KW - Foreign Language Learning

KW - Language

KW - Oral Communication

RP - NOT IN FILE

SP - 1245

EP - 1253

JF - Journal of Experimental Psychology: Human Perception and Performance

VL - 35

IS - 4

CY - US

PB - American Psychological Association

U1 - Sponsor: National Institute on Deafness and Other Communication Disorders. Grant: R01 DC000633.

Recipients: No recipient indicated

N2 - Much of speech perception research has focused on brief spectro-temporal properties in the signal, but some studies have shown that adults can recover linguistic form when those properties are absent. In this experiment, 7-year-old English-speaking children demonstrated adultlike abilities to understand speech when only sine waves (SWs) replicating the 3 lowest resonances of the vocal tract were presented, but they failed to demonstrate comparable abilities when noise bands amplitude-modulated with envelopes derived from the same signals were presented. In contrast, adults who were not native English speakers but who were competent 2nd-language learners were worse at understanding both kinds of stimuli than native English-speaking adults. Results showed that children learn to extract linguistic form from signals that preserve some spectral structure, even if degraded, before they learn to do so for signals that preserve only amplitude structure. The authors hypothesize that children's early sensitivity to global spectral structure reflects the role that it may play in language learning. (PsycINFO Database Record (c) 2012 APA, all rights reserved) (journal abstract)

SN - 1939-1277

AD - Nittrouer, Susan, Department of Otolaryngology-Head & Neck Surgery, College of Medicine, Ohio State University Cramblett Hall, Room 4126, 456 West 10th Avenue, Columbus, OH, US, 43210, nittrouer.1@osu.edu

UR - <http://search.ebscohost.com/login.aspx?direct=true&db=psyh&AN=2009-11357-018&site=ehost-live;nittrouer.1@osu.edu>

L3 - 10.1037/a0015020

ER -

TY - JOUR

ID - 1720

T1 - Saccades in adult Niemann-Pick disease type C reflect frontal, brainstem, and biochemical deficits

A1 - Abel,L.A.

A1 - Walterfang,M.

A1 - Fietz,M.

A1 - Bowman,E.A.

A1 - Velakoulis,D.

Y1 - 2009/03//

KW - PsycInfo

KW - Unsupervised Play Addition

KW - Niemann Pick disease

KW - Frontal Lobe

KW - brainstem

KW - biochemical deficits

KW - supranuclear palsy

KW - Psychosis

KW - cognitive deficits

KW - saccades

KW - Cognitive Impairment

KW - Eye Movements

KW - Picks Disease

KW - Brain Stem

RP - NOT IN FILE

SP - 1083

EP - 1086

JF - Neurology

VL - 72

IS - 12

CY - US

PB - Lippincott Williams &amp; Wilkins

N2 - Background: The autosomal recessive disorder Niemann-Pick type C (NPC) presents in adulthood with psychosis or cognitive deficits associated with supranuclear gaze palsies. While saccadic innervation to the extraocular muscles is generated in the brainstem, the frontal lobes play an integral role in the initiation of volitional saccades and the suppression of unwanted reflexive saccades. No study has examined the frontally driven volitional control of saccadic eye movements in NPC. Objective: To examine self-paced and antisaccades as well as reflexive saccades in adult patients with NPC, a disorder known to affect brainstem and frontal cortical function. Methods: Three biochemically confirmed adult patients with NPC were compared with 10 matched controls on horizontal saccadic and antisaccadic measures using an infrared limbus eye tracker. Patients' cholesterol esterification and filipin staining, Mini-Mental State performance, and NPC symptom level were rated. Results: Reflexive saccade latency ranged from shorter to longer than normal, reflexive saccade gain was reduced, asymptotic peak velocity was reduced, fewer self-paced saccades were generated, and increased errors on antisaccades were made by patients compared to controls. Patients with more severe biochemical, cognitive, and symptom deficits performed most poorly on brainstem and frontal ocular motor measures. Paradoxically, less severe illness was associated with an abnormally reduced saccadic latency. Conclusions: Ocular motor measures provide an index of disease severity in Niemann-Pick type C (NPC) and may be a useful adjunct for monitoring the illness progress and medication response. Reduced saccadic latency may result from inadequate fixation input from abnormally functioning frontal eye fields in NPC. (PsycINFO Database Record (c) 2012 APA, all rights reserved) (journal abstract)

SN - 1526-632X

AD - Walterfang, M., Royal Melbourne Hospital Level 2, John Cade Building, VIC, Australia, 3050, mark.walterfang@mh.org.au

UR - <http://search.ebscohost.com/login.aspx?direct=true&db=psych&AN=2009-04324-011&site=ehost-live;mark.walterfang@mh.org.au>

L3 - 10.1212/01.wnl.0000345040.01917.9d

ER -

TY - THES

ID - 1722

T1 - An investigation of the effects of make-believe play training on the development of self-regulation in head start children

A1 - Ogan,Amy T.

Y1 - 2009///

N1 - Accession Number: 2009-99200-042. First Author & Affiliation: Ogan, Amy T.; Illinois State U., US. Other Journal Titles: Dissertation Abstracts International. Release Date: 20100125. Publication Type: Dissertation Abstract, (0400); . Media Covered: Electronic. Document Type: Dissertation. Dissertation Number: AAI3353104. ISBN: 978-1-109-09374-2, 9781109093742. Language: English. Major Descriptor: Childhood Play Behavior; Classrooms; Self Regulation. Minor Descriptor: Ability; Preschool Education. Classification: Educational Psychology (3500) . Population: Human (10); . Age Group: Childhood (birth-12 yrs) (100) Preschool Age (2-5 yrs) (160) . Methodology: Empirical Study. Page Count: 1

KW - PsycInfo

KW - Unsupervised Play Addition

KW - Self Regulation

KW - head start children

KW - Classrooms

KW - self regulatory skills

KW - play based preschool programs

KW - Childhood Play Behavior

KW - ABILITY

KW - Preschool Education

RP - NOT IN FILE

JF - Dissertation Abstracts International: Section B: The Sciences and Engineering

VL - 70

IS - 4-B

CY - US

PB - ProQuest Information & Learning

N2 - In recent years, an emphasis on structured pre-academic time has shifted the focus away from play-based preschool programs. According to Vygotsky, play-based classrooms may actually be more beneficial to helping young children develop self-regulatory skills necessary to succeed in the elementary school years. Children from impoverished backgrounds often lag behind their peers in self-regulation and may benefit the most from play training. This was a short-term longitudinal study investigating the effects of play training on preschooler's self-regulation. Forty-five preschoolers attending a Head Start program were randomly divided into two groups. One group received eight weekly 15-min play training sessions followed by 5 minutes of freeplay. Trained research assistants guided the child's play and encouraged self-regulation skills. The other group participated in eight weekly 15-min freeplay only sessions. Freeplay for both groups was coded for activity type, self-regulation displayed, adult involvement, and child vocalizations. In addition, all children were administered a pretest and two posttest batteries of self-regulation tasks. It was hypothesized that children attending the play training sessions would show greater pre- to posttest gains in self-regulation, engage in more make-believe play, and display more self-regulation during freeplay than their peers who participated only in freeplay sessions. Contrary to expectation, results indicated that children who participated in freeplay only sessions showed more gains in self-regulation and spent more time in make-believe play than their peers who received play training. Few instances of self-regulation were observed during the freeplay sessions, however, as predicted more prosocial/rule following behavior was observed in the children who attended play training sessions. The findings suggest that play training sessions where an adult guides the child's play may actually constrict children's spontaneous freeplay. Instead, children may benefit more from play sessions with an adult present to gently support and encourage the play. (PsycINFO Database Record (c) 2012 APA, all rights reserved)

SN - 0419-4217

UR - <http://search.ebscohost.com/login.aspx?direct=true&db=psych&AN=2009-99200-042&site=ehost-live>

ER -

TY - JOUR

ID - 1723

T1 - Play, cognition and self-regulation: What exactly are children learning when they learn through play?

A1 - Whitebread,David

A1 - Coltman,Penny

A1 - Jameson,Helen  
 A1 - Lander,Rachel  
 Y1 - 2009///  
 KW - PsycInfo  
 KW - Unsupervised Play Addition  
 KW - Play  
 KW - Metacognition  
 KW - self-regulation  
 KW - problem-solving  
 KW - CHILDREN  
 KW - Childhood Play Behavior  
 KW - Childhood Play Development  
 KW - Problem Solving  
 KW - Self Regulation  
 RP - NOT IN FILE  
 SP - 40  
 EP - 52  
 JF - Educational and Child Psychology  
 VL - 26  
 IS - 2

CY - United Kingdom

PB - British Psychological Society

N2 - This paper explores the particular aspects of learning which might be supported through playful activity and reviews research and theory which link children's play, and particularly pretence or symbolic play, to the development of metacognitive and self-regulatory skills. Three studies are reported, one observational and two experimental, which have explored this relationship. The observational study involved the video-recording of 582 metacognitive or self-regulatory 'events' within Foundation Stage settings. The two experimental studies replicated in different learning domains the classic study of Sylva, Bruner and Genova (1976), which contrasted the problem-solving performance of 3- to 5-year-old children who had experienced a 'taught' and 'play' condition. Evidence from the present studies reported and other studies supports the view that play, and particularly pretence or symbolic play, which might be with objects or other children, is particularly significant in its contribution to the development of children as metacognitively skilful, self-regulated learners. Evidence from the observational study indicated that child-initiated playful activities, in small groups without adult supervision, supported the greatest proportion of self-regulatory behaviours. The experimental studies suggested that the experience of the 'play' condition was particularly effective in preparing the children for effortful, problem-solving or creative tasks which require a high level of metacognitive and self-regulatory skill. Metacognitive and self-regulatory development is crucially important in the development of academic skills which involve intentional learning, problem-solving and creativity. An understanding of the relationship between pretend or symbolic play and self-regulation is also helpful in providing clear guidelines for adults working with young children as regards their role in supporting and encouraging play in educational contexts. (PsycINFO Database Record (c) 2012 APA, all rights reserved) (journal abstract)

SN - 0267-1611

AD - Whitebread, David, University of Cambridge 184 Hills Road, Cambridge, United Kingdom, CB2 8PQ, dgwl004@cam.ac.uk

UR - <http://search.ebscohost.com/login.aspx?direct=true&db=psyh&AN=2009-16552-005&site=ehost-live;dgwl004@cam.ac.uk>

ER -

TY - CHAP

ID - 1724

T1 - Historical memories

A1 - Blatz,Craig W.

A1 - Ross,Michael

Y1 - 2009///

N1 - Accession Number: 2010-05180-009. First Author & Affiliation: Blatz, Craig W.; Department of Psychology, University of Waterloo, Waterloo, ON, Canada. Release Date: 20100517. Publication Type: Book,

(0200); Edited Book, (0280); . Media Covered: Print. Document Type: Chapter. ISBN: 978-0-521-75892-5, Paperback, 9780521758925; 978-0-521-76078-2, Hardcover, 9780521760782. Language: English. Major Descriptor: False Memory; History; Memory. Minor Descriptor: Ingroup Outgroup. Classification: Learning & Memory (2343) . Population: Human (10); . Intended Audience: Psychology: Professional & Research (PS) . References Available: Y.. Page Count: 15

KW - PsycInfo

KW - Unsupervised Play Addition

KW - historical memories

KW - ingroup

KW - skewed memories

KW - False Memory

KW - History

KW - Memory

KW - Ingroup Outgroup

RP - NOT IN FILE

SP - 223

EP - 237

T2 - Memory in mind and culture

A2 - Boyer,Pascal

A2 - Wertsch,James V.

CY - New York, NY US

PB - Cambridge University Press

U1 - Sponsor: Natural Sciences and Engineering Research Council. Other Details: Doctoral fellowship.

Recipients: Blatz, Craig W.

N2 - (from the chapter) After the attacks on the World Trade Center and Pentagon on September 11, 2001, the Princeton historian Bernard Lewis explained the thinking and behavior of Muslims to the American public in a New Yorker article (Lewis, 2001). Lewis wrote that, unlike Americans, Muslims know and care about history: In current American usage, the phrase "that's history" is commonly used to dismiss something as unimportant, of no relevance to current concerns. ... Middle Easterner's perception of history is nourished from the pulpit, by the schools, and by the media, and although it may be-indeed, often is-and inaccurate, it is nevertheless vivid and powerfully resonant, (p. 51) Lewis implies that Americans' (and presumably most Westerners') historical memories are not "nourished from the pulpit, by the schools, and by the media." He further implies that Americans' historical memories are accurate, even if they do not care much about history. In this chapter, we dispute each of these claims. Muslims are not unique in their use or abuse of history. People's memories of the histories of the national, ethnic, or religious groups to which they belong (ingroups) are often tilted in favor of their ingroups and against other groups. We present evidence that historical memories are skewed, in part, because children and adults are presented with selective and biased depictions of the past. Educators, religious leaders, politicians, and media all play an important role by influencing the knowledge available. We also show that people's response to the information available further affects their historical memories. People's memories are influenced by how they attend to, process, and retrieve the information that they receive. Individuals create historical memories that depict their valued ingroups favorably, even after reading unfavorable information. We reason that favorable memories of ingroups satisfy important group and individual needs. We conclude by discussing a recent surge in government apologies for past injustices. Government redress is important because it can possibly satisfy group and individual concerns, and contribute to more balanced historical memories.

(PsycINFO Database Record (c) 2012 APA, all rights reserved) (chapter)

SN - 978-0-521-75892-5

AD - Blatz, Craig W., Department of Psychology, University of Waterloo 200 University Avenue West, Waterloo, ON, Canada, N2L 3G1, cwblatz@uwaterloo.ca

UR - <http://search.ebscohost.com/login.aspx?direct=true&db=psych&AN=2010-05180-009&site=ehost-live;cwblatz@uwaterloo.ca>

L3 - 10.1017/CBO9780511626999.013

ER -

TY - JOUR

ID - 1725

T1 - Crisis and review of residential child care. Its role in child protection



A1 - Bravo,Amaia  
 A1 - Del Valle,Jorge F.  
 Y1 - 2009///  
 KW - PsycInfo  
 KW - Unsupervised Play Addition  
 KW - residential child care  
 KW - child protection  
 KW - Child Abuse  
 KW - Mental Health  
 KW - Child Care  
 KW - Protective Services  
 KW - Residential Care Institutions  
 RP - NOT IN FILE  
 SP - 42  
 EP - 52  
 JF - Papeles del Psic òlogo  
 VL - 30  
 IS - 1  
 CY - Spain  
 PB - Revista Del Colegio Oficial De Psicologos  
 N2 - Residential care continues to play an important role in Spain in the provision of care for children and adolescents in situations of abuse or neglect. Some newly-emerging issues, such as the arrival of unaccompanied asylum-seeking children, the increase in child-to-parent violence, or the need for therapeutic attention in children with emotional and mental health problems, have given rise to substantial changes in the structure and objectives of children's homes. Currently, child care work in children's homes is focused on intervention with adolescents and the new problems described. Although resources for younger children continue to exist, these tend to disappear as foster care becomes adequately established. Since the 1990s, the specialized child care model involving differentiated resources has been implemented in a highly inequitable way across Spain's different Autonomous Regions. As will be discussed in the present article, there remain many difficulties to overcome and challenges to be met in the area of residential child care. (PsycINFO Database Record (c) 2012 APA, all rights reserved) (journal abstract)  
 SN - 0214-7823  
 AD - Bravo, Amaia, Departamento de Psicología, Grupo de Investigacion en Familia e Infancia Plaza Feijoo s/n, 33003, Oviedo, Spain, amaiabravo@uniovi.es  
 UR - <http://search.ebscohost.com/login.aspx?direct=true&db=psyh&AN=2009-22396-005&site=ehost-live;amaiabravo@uniovi.es>  
 ER -  
  
 TY - JOUR  
 ID - 1729  
 T1 - Effects of powered mobility on self-initiated behaviours of very young children with locomotor disability (1986)  
 A1 - Rosenbaum,Peter  
 Y1 - 2008/09//  
 KW - PsycInfo  
 KW - Unsupervised Play Addition  
 KW - powered mobility  
 KW - self-initiated behaviours  
 KW - locomotor disability  
 KW - motorized wheelchairs  
 KW - spatial exploration  
 KW - Communication  
 KW - caregiver  
 KW - Exploratory Behavior  
 KW - Interpersonal Communication  
 KW - Locomotion

KW - Mobility Aids  
KW - Movement Disorders  
KW - Caregivers  
RP - NOT IN FILE  
JF - Developmental Medicine & Child Neurology  
JA - Dev.Med Child Neurol.  
VL - 50  
IS - 9  
CY - United Kingdom  
PB - Wiley-Blackwell Publishing Ltd.

N2 - This article presents a commentary of Butler (see record 1987-25503-001) which was previously published as "Effects of powered mobility on self-initiated behaviours of very young children with locomotor disability" in *Dev Med Child Neurol* 1986; 28; 325-32. This study reports the effects of powered mobility on the self-initiated behaviour of six children with various disabilities who, between 23 and 38 months of age, learnt to use motorized wheelchairs in less than three weeks. Using a multiple baseline design, two-hour observation periods were video-recorded at 10-day intervals before and after they achieved independent mobility. Frequency of self-initiated interaction with objects, spatial exploration and communication with caregiver were analyzed. Three children increased all three types of behaviour; one increased in two types but decreased in interaction with objects; and two increased in spatial exploration only. (PsycINFO Database Record (c) 2012 APA, all rights reserved)

SN - 1469-8749

UR - <http://search.ebscohost.com/login.aspx?direct=true&db=psyh&AN=2008-12970-002&site=ehost-live>  
ER -

TY - JOUR

ID - 1730

T1 - Effects of prenatal ethanol exposure on regulation of basal hypothalamic-pituitary-adrenal activity and hippocampal 5-HT<sub>1A</sub> receptor

A1 - Sliwowska,J.H.

A1 - Lan,N.

A1 - Yamashita,F.

A1 - Halpert,A.G.

A1 - Viau,V.

A1 - Weinberg,J.

Y1 - 2008/09//

KW - PsycInfo

KW - Unsupervised Play Addition

KW - prenatal ethanol exposure

KW - regulation

KW - basal hypothalamic-pituitary-adrenal activity

KW - hippocampal receptor

KW - gonadal hormones

KW - serotonin Type 1A receptor

KW - Ethanol

KW - Hypothalamic Pituitary Adrenal Axis

KW - Neural Receptors

KW - Prenatal Exposure

KW - Serotonin

KW - Gonadotropic Hormones

KW - Hippocampus

KW - Rats

RP - NOT IN FILE

SP - 1111

EP - 1123

JF - Psychoneuroendocrinology

VL - 33

IS - 8

CY - Netherlands

PB - Elsevier Science

N2 - Prenatal ethanol exposure, like other early adverse experiences, is known to alter hypothalamic-pituitary-adrenal (HPA) activity in adulthood. The present study examined the modulatory effects of the gonadal hormones on basal HPA regulation and serotonin Type 1A receptor (5-HT<sub>1A</sub>) mRNA levels in adult female rats prenatally exposed to ethanol (E) compared to that in females from pair-fed (PF) and ad libitum-fed control (C) conditions. We demonstrate, for the first time, long-lasting consequences of prenatal ethanol exposure for basal corticosterone (CORT) regulation and basal levels of hippocampal mineralocorticoid (MR), glucocorticoid (GR) and serotonin Type 1A (5-HT<sub>1A</sub>) receptor mRNA, as a function of estrous cycle stage: (1) basal CORT levels were higher in E compared to C females in proestrus but lower in E and PF compared to C females in estrus; (2) there were no differences among groups in basal levels of adrenocorticotropin (ACTH), estradiol or progesterone; (3) hippocampal MR mRNA levels were decreased in E compared to PF and C females across the estrus cycle, with the greatest effects in proestrus, whereas E (but not PF or C) females had higher hippocampal GR mRNA levels in proestrus than in estrus and diestrus; (4) 5-HT<sub>1A</sub> mRNA levels were increased in E compared to PF and C females in diestrus. That alterations were revealed as a function of estrous cycle stage suggests a role for the ovarian steroids in mediating the adverse effects of ethanol. Furthermore, it appears that ethanol-induced nutritional effects may play a role in mediating at least some of the effects observed. The resetting of HPA activity by early environmental events could be one mechanism linking early life experiences with long-term health consequences. Thus, changes in basal CORT levels, a shift in the MR/GR balance and alterations in 5-HT<sub>1A</sub> receptor mRNA could have important clinical implications for understanding the secondary disabilities, such as an increased incidence of depression, in children with FASD. (PsycINFO Database Record (c) 2012 APA, all rights reserved) (journal abstract)

SN - 0306-4530

AD - Sliwowska, J. H., Department of Cellular and Physiological Sciences, The University of the British Columbia 2350 Health Sciences Mall, Vancouver, BC, Canada, V6T 1Z3, sliwowsk@interchange.ubc.ca

UR - <http://search.ebscohost.com/login.aspx?direct=true&db=psych&AN=2008-11644-010&site=ehost-live>; sliwowsk@interchange.ubc.ca

L3 - 10.1016/j.psyneuen.2008.05.001

ER -

TY - THES

ID - 1734

T1 - First step or last chance: At-risk youth, alternative schooling and juvenile delinquency

A1 - Free, Janese Lynette

Y1 - 2008//

N1 - Accession Number: 2008-99170-526. First Author & Affiliation: Free, Janese Lynette; Northeastern U., US. Other Journal Titles: Dissertation Abstracts International. Release Date: 20081020. Publication Type: Dissertation Abstract, (0400); . Media Covered: Electronic. Document Type: Dissertation. Dissertation Number: AAI3304117. Language: English. Major Descriptor: Criminal Behavior; Criminal Justice; Juvenile Delinquency; Schools. Minor Descriptor: Social Behavior; Violence. Classification: Health & Mental Health Treatment & Prevention (3300) . Population: Human (10); . Age Group: Adolescence (13-17 yrs) (200) Adulthood (18 yrs & older) (300) . Methodology: Empirical Study; Quantitative Study. Page Count: 1

KW - PsycInfo

KW - Unsupervised Play Addition

KW - schooling

KW - Juvenile Delinquency

KW - criminal justice system

KW - Criminal Behavior

KW - Criminal Justice

KW - Schools

KW - Social Behavior

KW - Violence

RP - NOT IN FILE

JF - Dissertation Abstracts International Section A: Humanities and Social Sciences

VL - 69

IS - 3-A

CY - US

PB - ProQuest Information &amp; Learning

N2 - Schools are meant to be places where children can go to learn, play and socialize. While this remains true the vast majority of the time, some school children now face other issues such as assaults, robbery, weapons and even violence while in the classroom. As a result, policies such as the Gun Free Schools Act of 1994, were implemented in an attempt to deter students from bringing weapons to school by promising a swift, severe punishment with no exceptions for breaking the law. The implementation of this bill, along with other key influential factors, led to an increase in the number of at-risk students suspended or expelled from school, frequently leaving them with few options. The combination of out of school at-risk youth, at home alone or on the streets, with little or no supervision has proven to be a dangerous situation. To date we have found few answers to solving this social problem - academically or practically. This dissertation adds to the current research and literature by examining one option to addressing the dilemma that often leads youth down a hazardous path - namely, alternative schooling. These non-traditional schools offer at-risk youth, who are not otherwise successful in conventional schools, a "second chance" at literacy, pro-social behaviors and high school diplomas to help get their lives on a more positive track. As a result of months of participant observation, teacher interviews and student school records, this dissertation analyzed how an alternative education influences at-risk students who attended an alternative school in New England. The key questions guiding this research addressed why students attend alternative schools, how these specialized schools differ from traditional schools and how alternative students are influenced by learning in a non-traditional educational setting. Lastly, this dissertation not only identified the key factors influencing alternative students, but also discussed which of those factors enhanced students' development and which factors inhibited it. The purpose of this study is to further the academic literature and practical understanding of alternative schools, the at-risk youth who attend them and what factors influence these students' development and academic progress. If alternative schools are to be considered a possible catalyst for positive change, then we must first understand their positive and negative effects on students, behaviorally and academically. This dissertation concludes by offering several significant policy recommendations based on the key findings regarding alternative schooling from a macro-sociological perspective, as well as a micro-sociological perspective. This research will hopefully assist future researchers and professionals to better understand the potential alternative schools have for being students' "first step" toward positive life outcomes or their "last chance" before becoming uneducated, unemployed and possibly involved in the criminal justice system. (PsycINFO Database Record (c) 2012 APA, all rights reserved)

SN - 0419-4209

UR - <http://search.ebscohost.com/login.aspx?direct=true&db=psych&AN=2008-99170-526&site=ehost-live>

ER -

TY - THES

ID - 1735

T1 - Finding Sally: Personal encounters of the divine feminine through the archetype of the Angel

A1 - Udouj, Anne F.

Y1 - 2008///

N1 - Accession Number: 2008-99160-285. First Author & Affiliation: Udouj, Anne F.; Pacifica Graduate Inst., US. Other Journal Titles: Dissertation Abstracts International. Release Date: 20080929. Publication Type: Dissertation Abstract, (0400); . Media Covered: Electronic. Document Type: Dissertation. Dissertation Number: AAI3302075. Language: English. Major Descriptor: Archetypes; Childhood Development; Femininity. Classification: Developmental Psychology (2800) . Population: Human (10); . Methodology: Empirical Study; Quantitative Study. Page Count: 1

KW - PsycInfo

KW - Unsupervised Play Addition

KW - personal encounters

KW - divine feminine

KW - archetype

KW - Angel

KW - childhood imaginary

KW - Archetypes

KW - Childhood Development

KW - Femininity

RP - NOT IN FILE

JF - Dissertation Abstracts International: Section B: The Sciences and Engineering

VL - 69

IS - 2-B

CY - US

PB - ProQuest Information & Learning

N2 - My finding Sally is a soul journey that sought my banished childhood imaginary companion. Early childhood necessity prompted a cognizant relationship with my Angel, and I discovered an enigmatic imaginary playmate named Sally. I then had to close my imaginary door because Sally was not real or visible to adults. Sally's luminous presence vanished when I said she could no longer come to play under the maple tree. The complexities of this loss led to further woundings that have taken a lifetime to understand, grieve, and ultimately heal. Finding Sally through the archetype of the Angel involves a study of the thinly veiled imaginal space of grace, transcendence, and archetypal Angelic energy that separates the worlds of spirit and matter (Corbin, 1984/1995). I address the Angelic function of the guardian spirits of animals, ancestors, and Mary (Mother Mary and Mary Magdalene) as the Wisdom of Sophia in scholarly research, dreams, and imagination. Research modalities include the heuristic approach of Moustakas (1990), Corbin's (1984/1995) spiritual hermeneutic of ta'wil (bringing back), Bachelard's (1960/1969) notion of doubling, poetic reverie, and word dreaming, along with the Jungian shadow. I employ an erotic method of alchemical hermeneutics of mutual seduction and loving engagement with the subject (Romanyshyn & Goodchild, 2003) and spiral through the myths of Inanna, Cinderella, Vasilisa, and the Shulamite Bride of the Song of Songs as they are poetically addressed in a circling (Addison, 1989) and continually deepening process by which I connect the dots left as glimmers of Angel. I engage the Angel through the mundus imaginalis (Corbin, 1984/1995) and imagine a watery carriage with wheels of fire to transport me as I find Sally through numinous dream images, synchronicities, the imagination as reality (Avens, 1980), and deep unconscious ancestral memories of Other. Kabbalah as perception of beauty in seeking the Angel, an icon known as the Mandylion of Edessa, and the iconic restoration of my mother's antique doll are tended. Imaginal glimpses into Jerusalem as mystical Bride, Chartres Cathedral as living stone, elemental nature spirits, the Black Virgin, Mary, and Elijah are all viewed through an Angelic lens. Maya Angelou, Kali, Black Sarah, St. Nicholas, and other dazzling shadow figures emanate from the stars, with sock monkeys and Holy Fools as Angel in a labyrinthine process. I surprisingly discover my banished imaginary Sally to be a very real and numinous emanation of the Judaic Shekhinah (Scholem, 1991), and a final surprise from the Angel is discovering my Jewish ancestral roots, and how these ancestral memories have colored my dreams with starry footprints in the night. Sally continues to lead me in an ongoing engagement with the Divine Feminine. Thank you, Sally. You are love. (PsycINFO Database Record (c) 2012 APA, all rights reserved)

SN - 0419-4217

UR - <http://search.ebscohost.com/login.aspx?direct=true&db=psych&AN=2008-99160-285&site=ehost-live>

ER -

TY - CHAP

ID - 1740

T1 - Working with adult survivors of sexual and physical abuse

A1 - White, Beverly

Y1 - 2007///

N1 - Accession Number: 2007-07356-021. First Author & Affiliation: White, Beverly; Phillips-White Associates, Philadelphia, PA, US. Release Date: 20070924. Publication Type: Book, (0200); Edited Book, (0280); . Media Covered: Print. Document Type: Chapter. Book Type: Handbook/Manual. ISBN: 0-8261-0215-8, Hardcover, 0826102158; 978-0-8261-0215-7, Hardcover, 9780826102157. Language: English. Major Descriptor: Child Abuse; Cognitive Behavior Therapy; Physical Abuse; Sexual Abuse; Social Casework. Minor Descriptor: Early Experience; Schema; Survivors. Classification: Cognitive Therapy (3311) . Population: Human (10); Male (30); Female (40); Outpatient (60); . Age Group: Adulthood (18 yrs & older) (300) Young Adulthood (18-29 yrs) (320) Thirties (30-39 yrs) (340) . Intended Audience: Psychology: Professional & Research (PS) . References Available: Y.. Page Count: 23

KW - PsycInfo

KW - Unsupervised Play Addition

KW - adult survivors

KW - childhood sexual & physical abuse

KW - social work  
 KW - Cognitive Behavior Therapy  
 KW - schema-focused approach  
 KW - Child Abuse  
 KW - Physical Abuse  
 KW - Sexual Abuse  
 KW - Social Casework  
 KW - Early Experience  
 KW - Schema  
 KW - Survivors  
 RP - NOT IN FILE  
 SP - 467  
 EP - 489  
 T2 - Cognitive behavior therapy in clinical social work practice  
 A2 - Ronen,Tammie  
 A2 - Freeman,Arthur  
 CY - New York, NY US  
 PB - Springer Publishing Co  
 N2 - (from the chapter) Working with adult survivors of childhood sexual and physical abuse is broad and complex. Social workers especially play important roles as service providers to many adult survivors who present as clients or patients. The challenge for workers is to effectively implement evidence-based interventions, such as cognitive behavior therapy (CBT), that will enhance the success rate of treatment for these often complex and difficult clients. Case illustrations are included of a 29-yr-old male and a 32-yr-old female. (chapter)  
 Topics include: literature review, working with difficult clients using CBT (basic treatment strategies, stages of change) and methods of treatment (schema-focused approach). (PsycINFO Database Record (c) 2012 APA, all rights reserved) (chapter)  
 SN - 0-8261-0215-8  
 UR - <http://search.ebscohost.com/login.aspx?direct=true&db=psych&AN=2007-07356-021&site=ehost-live>  
 ER -

TY - CHAP  
 ID - 1741  
 T1 - The crisis of parental deployment in military service  
 A1 - Herzog,Joseph R.  
 A1 - Everson,R.Blaine  
 Y1 - 2007///  
 N1 - Accession Number: 2007-14176-011. First Author & Affiliation: Herzog, Joseph R.; College of Social Work, University of South Carolina, Columbia, SC, US. Release Date: 20080331. Publication Type: Book, (0200); Edited Book, (0280); . Media Covered: Print. Document Type: Chapter. Book Type: Textbook/Study Guide. ISBN: 1-59385-495-1, Hardcover, 1593854951; 978-1-59385-495-9, Hardcover, 9781593854959. Language: English. Major Descriptor: Family Relations; Family; Military Deployment; Stress; Trauma. Minor Descriptor: Childhood Development; Developmental Stages; Military Personnel; Models; Play Therapy. Classification: Military Psychology (3800) . Population: Human (10); Male (30); Female (40); . Location: US. Age Group: Childhood (birth-12 yrs) (100) Neonatal (birth-1 mo) (120) Infancy (2-23 mo) (140) Preschool Age (2-5 yrs) (160) School Age (6-12 yrs) (180) . Intended Audience: Psychology: Professional & Research (PS) . References Available: Y.. Page Count: 21  
 KW - PsycInfo  
 KW - Unsupervised Play Addition  
 KW - crisis  
 KW - military families  
 KW - Family Life  
 KW - family-systems-based approach  
 KW - family stressors  
 KW - child stressors  
 KW - parental deployment

KW - combat-related trauma

KW - play therapy model

KW - Developmental Stages

KW - Family Relations

KW - Family

KW - Military Deployment

KW - Stress

KW - Trauma

KW - Childhood Development

KW - Military Personnel

KW - Models

KW - Play Therapy

RP - NOT IN FILE

SP - 228

EP - 248

T2 - Play therapy with children in crisis: Individual, group, and family treatment (3rd Ed.)

A2 - Webb,Nancy Boyd

CY - New York, NY US

PB - Guilford Press

N2 - (from the chapter) In the aftermath of September 11, 2001, the U.S. military has been increasingly involved in conflicts around the world as part of the globalized war on terror. The family lives of soldiers, sailors, or air personnel involve numerous associated stressors and strains, including frequent relocations and lengthy separations that create incongruency between work and family life. Military families often consist of members from various regions of the world and/or different ethnic backgrounds, and one or both parents may have had previous marriages or relationships. In today's military, it is not uncommon for a child's father, mother, or both parents to deploy. This deployment may be of short duration (such as for a training mission) or for a longer period (such as for sea duty, peacekeeping missions, unaccompanied tours [those without family members], or extended tours in combat zones). Parental separation can have a profound impact on the family in general and on children in particular. The family member(s) in the military may view the deployment as business as usual, but children experience this separation as loss of daily contact with their parent(s). This loss is compounded by the potentially dangerous duty in which the parent(s) may be engaged. This chapter provides an overview of a family-systems-based approach with children in military families. We begin by discussing pertinent issues for families and children within the military context. In particular, we discuss the family and child stressors specifically associated with the deployment cycle, as well as the occurrence of combat-related trauma in service members and secondary traumatic stress in their family members. Next, an evolving dynamic model for play therapy is discussed by developmental stages and phases of treatment. Finally, we review two cases that illustrate this approach to play therapy with children in military families. (PsycINFO Database Record (c) 2012 APA, all rights reserved) (chapter)

SN - 1-59385-495-1

UR - <http://search.ebscohost.com/login.aspx?direct=true&db=psych&AN=2007-14176-011&site=ehost-live>

ER -

TY - CHAP

ID - 1742

T1 - Naturally occurring mentoring relationships involving youth

A1 - Spencer,Ren,e

Y1 - 2007///

N1 - Accession Number: 2007-00535-007. First Author & Affiliation: Spencer, Ren,e; School of Social Work, Boston University, Boston, MA, US. Release Date: 20071105. Publication Type: Book, (0200); Edited Book, (0280); . Media Covered: Print. Document Type: Chapter. Book Type: Handbook/Manual. ISBN: 1-4051-3373-2, Hardcover, 1405133732; 978-1-4051-3373-9, Hardcover, 9781405133739. Language: English. Major Descriptor: Adolescent Development; Childhood Development; Mentor; Role Models; Interpersonal Relationships. Minor Descriptor: Cognitive Processes; Individual Differences. Classification: Group & Interpersonal Processes (3020) . Population: Human (10); . Age Group: Childhood (birth-12 yrs) (100) School Age (6-12 yrs) (180) Adolescence (13-17 yrs) (200) Adulthood (18 yrs & older) (300) . Intended Audience: Psychology: Professional & Research (PS) . References Available: Y.. Page Count: 19

KW - PsycInfo

KW - Unsupervised Play Addition

KW - naturally occurring mentoring relationships

KW - Youth

KW - Adults

KW - relationship formation & development

KW - support

KW - psychological processes

KW - Individual Differences

KW - very important people

KW - Role Models

KW - Adolescent Development

KW - Childhood Development

KW - Mentor

KW - Interpersonal Relationships

KW - Cognitive Processes

RP - NOT IN FILE

SP - 99

EP - 117

T2 - The Blackwell handbook of mentoring: A multiple perspectives approach

A2 - Allen, Tammy D.

A2 - Eby, Lillian T.

CY - Malden

PB - Blackwell Publishing

N2 - (from the chapter) When successful adults who have overcome difficult life circumstances are asked to reflect on the major influences in their lives, many recall a caring adult whose presence during their youth made all the difference. These familiar stories of what have come to be called natural mentor relationships are receiving increasing attention by researchers of child development and practitioners working to intervene in the lives of vulnerable and troubled youth. Natural mentoring relationships may evolve out of a range of roles that adults play in the lives of youth, including extended family members, family friends, neighbors, teachers, coaches, after-school program staff, and religious group leaders. These relationships may be longstanding, spanning many years, or more short-term with brief encounters at critical junctures leaving a lasting impression on a young person. Natural mentor relationships appear to be far more prevalent than formal ones. Yet, natural mentor relationships have received relatively scant attention in the developmental literature to date. The research literature on natural mentors is diffuse, as the topic has been approached from a variety of angles. The literature on youth's relationships with unrelated adults, work that has grown out of social network research, has served as the foundation for the consideration of natural mentoring relationships. More recently, focused attention has been paid to what are being called adult very important people (VIPs) in the lives of youth. The growing interest in mentoring more generally has contributed to an increase in these studies of adults who serve as a guide or role model to young people in some fashion. As these adults are often family members the use of the term nonparental rather than unrelated adult has been increasing. Other studies use the term natural mentors to refer to influential adults, related and unrelated, in the lives of youth. In this chapter, research from each of these traditions is synthesized to present a picture of our current understanding of natural mentoring relationships between youth and adults. First, what is known about the prevalence of natural mentoring relationships is reviewed. This is followed by discussions of the development of natural mentoring relationships, the types of support these relationships offer, and what are thought to be some of the key psychological processes occurring in these important connections. Individual differences that appear to contribute to the formation of natural mentoring relationships are then considered and, finally, the conclusion of this chapter is devoted to detailing areas for further research. (PsycINFO Database Record (c) 2012 APA, all rights reserved) (chapter)

SN - 1-4051-3373-2

UR - <http://search.ebscohost.com/login.aspx?direct=true&db=psych&AN=2007-00535-007&site=ehost-live>

ER -

TY - BOOK

ID - 1743



T1 - Children at play: An American history

A1 - Chudacoff,Howard P.

Y1 - 2007///

N1 - Accession Number: 2007-12982-000. First Author & Affiliation: Chudacoff, Howard P.; Brown University, Providence, RI, US. Release Date: 20070910. Publication Type: Book, (0200); Authored Book, (0240); . Media Covered: Print. ISBN: 0-8147-1664-4, Hardcover, 0814716644; 978-0-8147-1664-9, Hardcover, 9780814716649. Language: English. Major Descriptor: Childhood Play Behavior; History. Minor Descriptor: Childhood Development. Classification: Psychosocial & Personality Development (2840) . Population: Human (10); . Location: US. Age Group: Childhood (birth-12 yrs) (100) . Intended Audience: General Public (GP)

KW - PsycInfo

KW - Unsupervised Play Addition

KW - History

KW - children's play

KW - Childhood Play Behavior

KW - Childhood Development

RP - NOT IN FILE

CY - New York, NY US

PB - New York University Press

N2 - (from the jacket) Today many parents can seem overly involved with their children's activities--from never letting them out of their sight, to managing their every activity morning to night--while just a couple decades ago children more often were left to play without adult supervision. But for all the attention from adults, we know little about how children actually play, and even less about play from a child's point of view. In this fascinating and enlightening book, Howard Chudacoff presents the first history of children's play in the U.S. and ponders what it tells us about ourselves. Through expert investigation in primary sources--including dozens of children's diaries, hundreds of autobiographical recollections of adults, and a wealth of child-rearing manuals--along with wide-ranging readings of the work of educators, journalists, market researchers, and scholars--Chudacoff digs into the "underground" of play. Ranging over the last 300 years, he contrasts the activities that genuinely occupied children's time with what adults thought children ought to be doing. Filled with intriguing stories and rich insights, *Children at Play* provides a chronological history of play in the U.S. from the viewpoint of children themselves. Focusing on youngsters between the ages of about six and twelve, it highlights the transformation of "child's play," paying attention not only to the activities of the cultural elite but to those of working-class children, of slaves, and of Native Americans. In addition, the author considers the findings, observations, and theories of numerous social scientists along with those of fellow historians. (PsycINFO Database Record (c) 2012 APA, all rights reserved) (jacket)

SN - 0-8147-1664-4

UR - <http://search.ebscohost.com/login.aspx?direct=true&db=psych&AN=2007-12982-000&site=ehost-live>

ER -

TY - BOOK

ID - 1744

T1 - Adolescents, media, and the law: What developmental science reveals and free speech requires

A1 - Levesque,Roger J.R.

Y1 - 2007///

N1 - Accession Number: 2007-09555-000. First Author & Affiliation: Levesque, Roger J. R.. Release Date: 20070917. Publication Type: Book, (0200); Authored Book, (0240); . Media Covered: Print. ISBN: 978-0-19-532044-2, Hardcover, 9780195320442. Language: English. Major Descriptor: Adolescent Development; Communications Media; Law (Government). Minor Descriptor: Behavior; Body Image; Health; Legal Processes; Mass Media; Self Concept; Sexuality; Tobacco Smoking; Violence. Classification: Developmental Psychology (2800) Mass Media Communications (2750) . Population: Human (10); . Age Group: Adolescence (13-17 yrs) (200) . Intended Audience: Psychology: Professional & Research (PS) . References Available: Y

KW - PsycInfo

KW - Unsupervised Play Addition

KW - media

KW - law

KW - adolescent identity & behavior & health

KW - Adolescent Development

KW - Prosocial Behavior

KW - Violence

KW - body images

KW - Smoking

KW - Sexuality

KW - free speech rights

KW - legal approaches

KW - Communications Media

KW - Law (Government)

KW - Behavior

KW - Body Image

KW - Health

KW - Legal Processes

KW - Mass Media

KW - Self Concept

KW - Tobacco Smoking

RP - NOT IN FILE

CY - New York, NY US

PB - Oxford University Press

T3 - American Psychology-Law Society series

N2 - (from the foreword) In this book Roger Levesque focuses on the impact of media on adolescents. As he notes in his introductory chapter, today's adolescents are inundated with a wide variety of media, more so than any prior generation. Television, video games, movies, Internet, and MP3 players play an increasing dominant role in the lives of many youth. Unlike prior generations, adolescents are considerably more autonomous, typically interacting with the media with little or no adult supervision. Media clearly play an important role in shaping adolescent identity, behavior, and health. Levesque's perspective is that the media can have both positive and negative effects on adolescent behavior and he is interested in understanding these effects in the context of adolescent development. He cautions us to not view the relationship of media and adolescent development in a narrow and simplistic manner. Indeed, while he acknowledges that the research on media effects has provided useful information about its impact, he is clear that the research falls short in aiding our understanding of the multiple factors that shape adolescent development. Professor Levesque notes that the media's impact on prosocial behavior may be more powerful than its negative impact. Unfortunately, a substantial amount of the research focuses on the negative effects. He presents concise, clear summaries of what the research tells us about the impact of the media in four areas: violence, body images, smoking, and sexuality. He identifies gaps in our knowledge and provides directions for future research. He points to many contradictory findings and notes that we have insufficient information about long-term effects. His conclusion that there is evidence of negative effects in each of these areas will not be surprising to most. This review of research is important in that it supports the conclusion that society should be concerned about the impact of media on adolescent development. It provides the basis for his analysis of how society should respond to this concern. He notes that the dominant response has been censorship to restrict access of adolescents to certain media. Parents are, of course, expected to be the primary mechanism for restricting access. As Levesque points out, this may be viable with young children but generally fails with adolescents. Following a stimulating and thoughtful discussion of free speech rights, he concludes that the current legal approaches to limit adolescent rights also fail to address the concerns, and he concludes that the legal system's adult-centered approach has negatively impacted the constitutional rights of adolescents. Levesque proposes a creative alternative, one that would not restrict adolescent access but rather would foster self-governance and increased civic participation. Rather than focusing on media as a source of negative influence, his approach seeks to promote the development of competency through access to information. His analysis and recommendations will be of interest to adolescents, parents, teachers, school administrators, community leaders, and policy makers, and I expect they will provide the foundation for stimulating and valuable discussion about the role of media in our society.

(PsycINFO Database Record (c) 2012 APA, all rights reserved) (foreword)

SN - 978-0-19-532044-2

UR - <http://search.ebscohost.com/login.aspx?direct=true&db=psych&AN=2007-09555-000&site=ehost-live>

ER -

TY - JOUR

ID - 1745

T1 - Contextually influenced patterns of play-developmental age associations for preschoolers with and without mental retardation

A1 - Malone,D.Michael

Y1 - 2006/12//

KW - PsycInfo

KW - Unsupervised Play Addition

KW - play-developmental age associations

KW - preschoolers

KW - Mental Retardation

KW - Childhood Development

KW - Childhood Play Behavior

KW - Intellectual Development Disorder

RP - NOT IN FILE

SP - 215

EP - 225

JF - Early Childhood Education Journal

VL - 34

IS - 3

CY - Germany

PB - Springer

N2 - The purpose of this paper is to present data demonstrating the differential pattern of association among play behaviors and developmental age that emerge for children with and without mental retardation across play situations. Seventeen preschool children with mental retardation and 17 preschool children without mental retardation were matched on developmental age and sex and observed during both home-based independent play and classroom-based freeplay. Results are presented for (a) between-group comparisons of home-based and classroom-based categorical-developmental age and sequential play-developmental age correlational patterns, (b) between setting comparisons of home-based and classroom-based categorical-developmental age and sequential play-developmental age correlational patterns within each group, and (c) comparisons of the pattern of categorical play-developmental age and sequential play-developmental age correlations within both setting and group. Results suggest both group and setting variation in the play-developmental age correlational patterns. Implications for multi-contextual understanding of children's play and the use of play in early childhood assessment are discussed. (PsycINFO Database Record (c) 2012 APA, all rights reserved) (journal abstract)

SN - 1573-1707

AD - Malone, D. Michael, Early Childhood Education, University of Cincinnati , Cincinnati, OH, US, 45221-0105, d.michael.malone@uc.edu

UR - <http://search.ebscohost.com/login.aspx?direct=true&db=psych&AN=2007-07685-004&site=ehost-live;d.michael.malone@uc.edu>

L3 - 10.1007/s10643-006-0134-7

ER -

TY - JOUR

ID - 1746

T1 - Differential expression of toy play by preschoolers with and without mental retardation

A1 - Malone,D.Michael

Y1 - 2006///

KW - PsycInfo

KW - Unsupervised Play Addition

KW - differential expression

KW - toy play

KW - preschoolers

KW - Mental Retardation

KW - developmental age

KW - play ability

KW - Childhood Play Behavior

KW - Developmental Age Groups

KW - Preschool Students

KW - Toys

KW - Classrooms

KW - Parents

KW - Intellectual Development Disorder

RP - NOT IN FILE

SP - 117

EP - 131

JF - Journal of Research in Childhood Education

VL - 21

IS - 2

CY - US

PB - Assn for Childhood Education International

N2 - Analyses of the peak and predominant toy play of 17 preschool children with mental retardation and 17 preschool children without mental retardation are presented. Groups were matched on developmental age and sex and observed during both a home-based independent play situation and classroom-based free play. Results are presented for 1) a comparison of predominant play between setting for each group, 2) a comparison of peak play between setting for each group, 3) between-group analyses of predominant and peak play, and 4) a comparison of predominant and peak play. The results provide additional support for, and extend efforts to understand, contextual variation of children's toy play by demonstrating an advantage of home-based play over classroom-based play for both groups as well as an advantage of children with mental retardation over children without mental retardation during the home-based play situation. These data can be used to promote positive perceptions of, and attitudes toward, children with mental retardation among both parents and teachers, and to promote the use of a comprehensive, multi-contextual understanding of children's play ability and potential that is necessary for developing effective interventions. (PsycINFO Database Record (c) 2012 APA, all rights reserved) (journal abstract)

SN - 0256-8543

AD - Malone, D. Michael, College of Education, University of Cincinnati One Edwards Center, Room 2150-U, P.O. Box 210105, Cincinnati, OH, US, 45221-0105

UR - <http://search.ebscohost.com/login.aspx?direct=true&db=psych&AN=2007-12057-001&site=ehost-live>

L3 - 10.1080/02568540609594583

ER -

TY - JOUR

ID - 1747

T1 - Randomised controlled trial of a parenting intervention in the voluntary sector for reducing child conduct problems: outcomes and mechanisms of change

A1 - Gardner,Frances

A1 - Burton,Jennifer

A1 - Klimes,Ivana

Y1 - 2006/11//

KW - PsycInfo

KW - Unsupervised Play Addition

KW - video based intervention

KW - parenting skill

KW - community

KW - cognitive behavioral program

KW - voluntary sector

KW - conduct problems

KW - Behavior

KW - clinically referred children

KW - home observation

KW - Problem Solving

KW - Behavior Problems

KW - Cognitive Behavior Therapy

KW - Group Psychotherapy

KW - Parenting Skills

KW - Behavior Change

KW - Community Mental Health Services

KW - Consumer Satisfaction

KW - Intervention

KW - Videotape Instruction

RP - NOT IN FILE

SP - 1123

EP - 1132

JF - Journal of Child Psychology and Psychiatry

VL - 47

IS - 11

CY - United Kingdom

PB - Blackwell Publishing

N2 - Background: To test effectiveness of a parenting intervention, delivered in a community-based voluntary-sector organisation, for reducing conduct problems in clinically-referred children. Methods: Randomised controlled trial, follow-up at 6, 18 months, assessors blind to treatment status. Participants--76 children referred for conduct problems, aged 2-9, primarily low-income families, randomised to treatment vs. 6-month wait-list group. Retention was 93% at 6 months, 90% at 18 months. Interventions--Webster-Stratton Incredible Years video-based 14-week group programme, teaches cognitive-behavioural principles for managing behaviour, using a collaborative, practical, problem-solving approach. Primary outcomes--child problem behaviour by parent-report (Eyberg) and home-based direct observation; secondary outcomes--observed positive and negative parenting; parent-reported parenting skill, confidence and depression. Results: Post-treatment improvements were found in child problem behaviour, by parent-report (effect size (ES) .48,  $p=.05$ ) and direct observation (ES .78,  $p=.02$ ); child independent play (ES .77,  $p=.003$ ); observed negative (ES .74,  $p=.003$ ) and positive (ES .38,  $p=.04$ ) parenting; parent-reported confidence (ES .40,  $p=.03$ ) and skill (ES .65,  $p=.01$ ), using ANCOVA to control for baseline scores. Maternal depression did not change. Consumer satisfaction was high. At 18-month follow-up, although no randomised comparison was possible, changes appeared to maintain, with no significant change toward baseline level on any measure. Change in observed positive parenting appeared to mediate change in child problem behaviour ( $p < .025$ ). Conclusions: Findings suggest that a group-based cognitive-behavioural parenting programme, delivered by well-trained and supervised staff, can be effective in a community voluntary-sector setting, for reducing conduct problems and enhancing parenting skills. Change in parenting skill appears to be a key mechanism for change in child behaviour. Findings have implications for feasibility of translating evidence-based programmes, even for clinically-referred conduct problems, into less specialised community settings, likely to have lower costs and be more accessible for families. (PsycINFO Database Record (c) 2012 APA, all rights reserved) (journal abstract)

SN - 1469-7610

AD - Gardner, Frances, Centre for Evidence-Based Intervention, Department of Social Policy & Social Work, Oxford University 32, Wellington Square, Oxford, United Kingdom, OX1 2ER, frances.gardner@socres.ox.ac.uk

UR - <http://search.ebscohost.com/login.aspx?direct=true&db=psyh&AN=2006-20991-006&site=ehost-live;frances.gardner@socres.ox.ac.uk>

L3 - 10.1111/j.1469-7610.2006.01668.x

ER -

TY - THES

ID - 1750

T1 - Encouraging independent play: Verbal versus nonverbal reinforcement

A1 - Smith, Raegan B.

Y1 - 2006///

N1 - Accession Number: 2006-99024-032. First Author & Affiliation: Smith, Raegan B.; Oklahoma State U., US. Other Journal Titles: Dissertation Abstracts International. Release Date: 20070312. Publication Type: Dissertation Abstract, (0400); . Media Covered: Electronic. Document Type: Dissertation. Dissertation Number: AAI3220241. Language: English. Major Descriptor: Childhood Development; Nonverbal Reinforcement; Positive Reinforcement; Verbal Reinforcement. Minor Descriptor: Feedback; Parents. Classification: Health & Mental Health Treatment & Prevention (3300) General Psychology (2100) . Population: Human (10); . Age

Group: Childhood (birth-12 yrs) (100) Preschool Age (2-5 yrs) (160) . Methodology: Empirical Study; Quantitative Study. Page Count: 1

KW - PsycInfo

KW - Unsupervised Play Addition

KW - nonverbal reinforcement

KW - Positive Reinforcement

KW - Young Children

KW - Childhood Development

KW - Feedback

KW - Parents

KW - verbal reinforcement

RP - NOT IN FILE

JF - Dissertation Abstracts International: Section B: The Sciences and Engineering

VL - 67

IS - 6-B

CY - US

PB - ProQuest Information & Learning

N2 - Two types of positive reinforcement were compared to examine their effectiveness in encouraging independent play in young children. A within-subjects design was used with mothers and their 30- to 42-month-old children. Experimental conditions varied according to type of positive feedback parents were instructed to give, such that praise and nonverbal affection strategies were used in alternate conditions and counterbalanced for order of presentation. Paired samples mean comparisons indicated no difference in children's behaviors across study conditions. However, differences were found between the first and second halves within each condition. Lower rates of independent play were found in the latter halves of both conditions. In the nonverbal condition, higher amounts of solicitation for attention and negative affect were found in the second half of the condition. In addition, correlation analyses suggested relations between child behavior and adjustment problems and observed behavior under various conditions of the study. (PsycINFO Database Record (c) 2012 APA, all rights reserved)

SN - 0419-4217

UR - <http://search.ebscohost.com/login.aspx?direct=true&db=psych&AN=2006-99024-032&site=ehost-live>

ER -

TY - CHAP

ID - 1751

T1 - Media Use by Infants and Toddlers: A Potential for Play

A1 - Weber, Deborah S.

Y1 - 2006//

N1 - Accession Number: 2006-10812-009. First Author & Affiliation: Weber, Deborah S.; Fisher-Price Child Research Department, US. Release Date: 20061113. Publication Type: Book, (0200); Edited Book, (0280); . Media Covered: Print. Document Type: Chapter. ISBN: 0-19-530438-1, Hardcover, 0195304381; 978-0-19-530438-1, Hardcover, 9780195304381. Language: English. Major Descriptor: Childhood Play Behavior; Early Childhood Development; Infant Development; Mass Media; Parent Child Relations. Minor Descriptor: Television Viewing; Videotapes. Classification: Developmental Psychology (2800) Mass Media Communications (2750) . Population: Human (10); . Age Group: Childhood (birth-12 yrs) (100) . Intended Audience: Psychology: Professional & Research (PS) . References Available: Y.. Page Count: 23

KW - PsycInfo

KW - Unsupervised Play Addition

KW - media viewing

KW - Infants

KW - Toddlers

KW - Play

KW - parent-child interactions

KW - Television

KW - videos

KW - Childhood Play Behavior

KW - Early Childhood Development

KW - Infant Development  
 KW - Mass Media  
 KW - Parent Child Relations  
 KW - Television Viewing  
 KW - Videotapes  
 RP - NOT IN FILE  
 SP - 169  
 EP - 191  
 T2 - Play = learning: How play motivates and enhances children's cognitive and social-emotional growth  
 A2 - Singer,Dorothy G.  
 A2 - Golinkoff,Roberta Michnick  
 A2 - Hirsh-Pasek,Kathy  
 CY - New York, NY US  
 PB - Oxford University Press  
 N2 - (from the chapter) Can the media serve as a tool for parents and caregivers to facilitate play among infants and toddlers? A common belief is that television and videos take the place of spending time with others and playing. Another concern is that parents use television as a "babysitter." This may conjure up an image of children spending numerous hours passively watching television or videos with no adult presence or interaction. Is this in fact what is really occurring? Can and do television and videos actually encourage parent-child interactions? Can children use media as a model to incorporate in their imitative play? Do the media enhance play or detract from play? The amount of time that very young children spend watching television and video programs is increasing, and unfortunately this most likely detracts from the amount of time they spend playing. We now have data indicating the media-viewing habits of infants and toddlers, what factors influence these media-viewing habits, and the effects of such early viewing on the development of cognitive and social-emotional skills. This chapter discusses research regarding infant and toddler media and places it in the context of children's play and parent-child interactions. (PsycINFO Database Record (c) 2012 APA, all rights reserved) (chapter)  
 SN - 0-19-530438-1  
 UR - <http://search.ebscohost.com/login.aspx?direct=true&db=psych&AN=2006-10812-009&site=ehost-live>  
 ER -

TY - JOUR  
 ID - 1752  
 T1 - Playschool in pictures: Children's photographs as a research method  
 A1 - Einarsdottir,Johanna  
 Y1 - 2005/08//  
 KW - PsycInfo  
 KW - Unsupervised Play Addition  
 KW - children's photographs  
 KW - playschool  
 KW - child perception  
 KW - educational setting  
 KW - child research  
 KW - research methods  
 KW - Child Attitudes  
 KW - Childhood Play Behavior  
 KW - Early Childhood Development  
 KW - Photographs  
 KW - Preschool Education  
 KW - Cameras  
 KW - Methodology  
 KW - Preschool Students  
 RP - NOT IN FILE  
 SP - 523  
 EP - 541  
 JF - Early Child Development and Care

VL - 175

IS - 6

CY - United Kingdom

PB - Taylor &amp; Francis

N2 - The paper focuses on children's photographs as a method to use in research with children. Studies using photographs with children are reviewed and compared and a study conducted in one Icelandic playschool is described. The playschool was involved in a project where the purpose was to look at the ways children think about their early childhood educational setting and to develop methods for listening to children's perspectives. The paper describes and compares two approaches where cameras were used. One group used digital cameras to take pictures in their playschool while they showed the researcher important places and things in the playschool. The other group was given disposable cameras that they could use unsupervised for a period of time. The results show that using cameras and children's photos is a notable method to use when seeking children's perspectives on their life in an early childhood setting. (PsycINFO Database Record (c) 2012 APA, all rights reserved)

(journal abstract)

SN - 1476-8275

UR - <http://search.ebscohost.com/login.aspx?direct=true&db=psyh&AN=2005-07650-005&site=ehost-live>

L3 - 10.1080/03004430500131320

ER -

TY - JOUR

ID - 1753

T1 - Symbolic play in congenitally blind children

A1 - Bishop,Martin

A1 - Hobson,R.Peter

A1 - Lee,Anthony

Y1 - 2005///

KW - PsycInfo

KW - Unsupervised Play Addition

KW - symbolic play

KW - congenitally blind children

KW - Scaffolding

KW - social relations

KW - Verbal Ability

KW - Blind

KW - Recreation

KW - Interpersonal Relationships

RP - NOT IN FILE

SP - 447

EP - 465

JF - Development and Psychopathology

VL - 17

IS - 2

CY - United Kingdom

PB - Cambridge University Press

N2 - There is controversy over the existence and nature of blind children's limitations in symbolic play. In this study we tested 13 5- to 9-year-old congenitally blind children for the ability to symbolize when an adult provided scaffolding for their play. The blind children were selected on the basis that they did not have the syndrome of autism, and they comprised two groups matched for age (MA) and verbal ability on the Wechsler Intelligence Scale for Children who contrasted in their ability to engage in social relations. We also tested a group of sighted children who were MA matched with the more socially able blind children. On the basis of an hypothesis about the social-developmental sources of symbolic play deficits in congenitally blind children, we predicted differences between the socially able and socially impaired groups of blind children in the following respects: the attribution of symbolic meanings to play materials, the ascription of individual roles to play figures, and the anchorage of play in the scenario as presented by the adult. The results accorded with these predictions. Whereas the more socially able blind children showed symbolic play that was very similar to that of sighted children, the MA- and IQ-matched socially impaired blind children were limited in the three aspects of



their play. On the other hand, even the socially impaired children showed instances of symbolizing. The findings suggest a way to reconcile conflicting reports of symbolic play deficits in young blind children, and may be relevant for explaining the association between autism and congenital blindness. (PsycINFO Database Record (c) 2012 APA, all rights reserved) (journal abstract)

SN - 1469-2198

AD - Hobson, R. Peter, Adult Department, Tavistock Clinic 120, Belsize Lane, London, United Kingdom, NW3 5BA, r.hobson@ucl.ac.uk

UR - <http://search.ebscohost.com/login.aspx?direct=true&db=psych&AN=2005-05658-008&site=ehost-live;r.hobson@ucl.ac.uk>

L3 - 10.1017/S0954579405050212

ER -

TY - THES

ID - 1754

T1 - The developmental status and play occupations of young children institutionalized in Eastern Europe

A1 - Daunhauer,Lisa Ann

Y1 - 2005///

N1 - Accession Number: 2005-99012-162. First Author & Affiliation: Daunhauer, Lisa Ann; Boston U., US.

Other Journal Titles: Dissertation Abstracts International. Release Date: 20051011. Publication Type:

Dissertation Abstract, (0400); . Media Covered: Electronic. Document Type: Dissertation. Dissertation Number:

AAI3157364. Language: English. Major Descriptor: Childhood Play Development; Infant Development;

Institutionalization. Minor Descriptor: Age Differences; Childhood Development; Childhood Play Behavior;

Cognitive Ability; Mental Health; Orphanages. Classification: Developmental Psychology (2800) . Population:

Human (10); Male (30); Female (40); . Location: Eastern Europe. Age Group: Childhood (birth-12 yrs) (100)

Infancy (2-23 mo) (140) Preschool Age (2-5 yrs) (160) . Methodology: Empirical Study; Quantitative Study.

Page Count: 1

KW - PsycInfo

KW - Unsupervised Play Addition

KW - developmental status

KW - play occupations

KW - mental performance

KW - prematurity

KW - Orphanages

KW - cognitive functioning

KW - Infant Development

KW - Institutionalization

KW - Childhood Play Development

KW - Age Differences

KW - Childhood Development

KW - Childhood Play Behavior

KW - Cognitive Ability

KW - Mental Health

RP - NOT IN FILE

JF - Dissertation Abstracts International: Section B: The Sciences and Engineering

VL - 65

IS - 12-B

CY - US

PB - ProQuest Information & Learning

N2 - This three-part investigation examined the effects of institutionalization on development using both standardized measures and naturalistic observations. In Study I, 93 infants and young children (50 males, 43 females) between 1 and 46 months of age were assessed using the Bayley Scales of Infant Development (BSID-II). Results indicated that the study group performed significantly below the standardization sample on both the BSID-II mental and psychomotor domains ( $t(92) = -26.91, p \leq .001$ , and  $t(92) = -25.97, p \leq .001$  respectively). Linear multiple regressions indicated that prematurity and current weight-for-age best predicted mental performance, while current weight best predicted psychomotor performance, with prematurity approaching significance ( $R = .45, F(6, 84) = 3.36, p \leq .01$ , and  $R = .36, F(6, 84) = 1.87, p \leq .10$  respectively).

A subsample (n = 20) was re-assessed ( M = 10 months later, SD = .98). Paired t-tests indicated no significant differences between the subsample's first and second performances, however, there was a medium effect size for an increase in the mental score over time (d = .46). Correlations between first and second assessments were r = .08 (mental domain) and r = .52 (psychomotor domain). Standardized assessments used with children living in orphanages may provide a narrow view of a child's strengths and abilities. Therefore, Study II investigated the relationship between the institutionalized children's independent play skills and cognitive functioning. Twenty-six infants and young children between 10 and 38 months of age were assessed with the BSID-II, followed by video-taped play sessions. Results indicated that when compared to a typical American sample matched for age, significantly more study participants than the comparison group demonstrated play skills below chronological age on levels of symbolic play, but generally not below mental developmental age. In Study III, the same study group was video-taped interacting with a caregiver in order to assess the effects of caregiver interactions on play skills. The children demonstrated higher-level play skills in the interactive condition than when playing alone (t(25) = -1.88, p le; .07, d = .53). Two caregiver interaction patterns emerged during the childrens' highest levels of play: social-emotional support and task support. Success for the child was strongly associated with having a caregiver who provided more structure/assistance, and who was directive, mutually engaged, and encouraging. This project highlights the importance of considering factors other than length of time institutionalized when evaluating the developmental status of this population. (PsycINFO Database Record (c) 2012 APA, all rights reserved)

SN - 0419-4217

UR - <http://search.ebscohost.com/login.aspx?direct=true&db=psych&AN=2005-99012-162&site=ehost-live>

ER -

TY - THES

ID - 1755

T1 - The role that highlights play in providing information about depth and shape

A1 - Elieff,Chryle Ann

Y1 - 2005///

N1 - Accession Number: 2005-99010-242. First Author & Affiliation: Elieff, Chryle Ann; U Minnesota, US.

Other Journal Titles: Dissertation Abstracts International. Release Date: 20050829. Publication Type:

Dissertation Abstract, (0400); . Media Covered: Electronic. Document Type: Dissertation. Dissertation Number:

AAI3154039. Language: English. Major Descriptor: Depth Perception; Form and Shape Perception;

Photographs; Visual Perception. Minor Descriptor: Observers. Classification: Developmental Psychology

(2800) . Population: Human (10); . Age Group: Childhood (birth-12 yrs) (100) Neonatal (birth-1 mo) (120)

Infancy (2-23 mo) (140) Preschool Age (2-5 yrs) (160) School Age (6-12 yrs) (180) Adolescence (13-17 yrs)

(200) Adulthood (18 yrs & older) (300) . Methodology: Empirical Study. Page Count: 1

KW - PsycInfo

KW - Unsupervised Play Addition

KW - highlights

KW - depth perception

KW - shape perception

KW - high quality photographs

KW - specular reflections

KW - Form and Shape Perception

KW - Photographs

KW - Visual Perception

KW - Observers

RP - NOT IN FILE

JF - Dissertation Abstracts International: Section B: The Sciences and Engineering

VL - 65

IS - 11-B

CY - US

PB - ProQuest Information & Learning

N2 - Little research has been done to explore the role that highlights, specular reflections present on the surface of objects, play in providing information about depth and shape to the observer. One way to explore whether their presence on objects and high-quality photographs of objects provides information about object shape is by exploring how they are perceived and subsequently acted upon by adults and children. This paper reports data

from four experiments demonstrating the role that highlights play in the perception of depth. Specifically, I ask whether highlights play a role in the perception of depth and, if so, whether the information is learned through experience with the environment. In the first experiment, adults were presented monocularly and binocularly with objects and high-quality photographs of those objects both with and without highlights and were allowed to manually act on the displays. In a second study, adults were presented with the displays from Experiment 1 as well as a photograph of a chrome plated cylinder with the reflections of the surrounds in the normal position or rotated 90 degrees. They were asked to draw and answer questions concerning their perception of the displays. In the third experiment, pre-schoolers were shown the same photographs of the cylinder and were asked to reach into a box and select one of two objects inside the box that matched the photograph. In the fourth study, a grasping task similar to Experiment 1 was used with nine-month-old infants. Results suggest that highlights may serve as a monocular depth cue for adults and some pre-schoolers, but there was little evidence to suggest that infants were sensitive to highlights. This may suggest that the ability to use specular reflections as information for shape may require experience associating specular reflections with three-dimensionality and that pre-schoolers already have that ability. (PsycINFO Database Record (c) 2012 APA, all rights reserved)

SN - 0419-4217

UR - <http://search.ebscohost.com/login.aspx?direct=true&db=psych&AN=2005-99010-242&site=ehost-live>

ER -

TY - CHAP

ID - 1756

T1 - Assessment of Sibling Relationships Using Play, Art, and Stories

A1 - Kirk,Kate

Y1 - 2005///

N1 - Accession Number: 2005-07318-008. First Author & Affiliation: Kirk, Kate. Release Date: 20060103.

Publication Type: Book, (0200); Edited Book, (0280); . Media Covered: Print. Document Type: Chapter. Book Type: Handbook/Manual. ISBN: 0-7657-0122-7, Hardcover, 0765701227. Language: English. Major Descriptor: Art; Measurement; Play Therapy; Sibling Relations; Storytelling. Minor Descriptor: Psychological Assessment. Classification: Art & Music & Movement Therapy (3357) . Population: Human (10); Male (30); Female (40); . Age Group: Childhood (birth-12 yrs) (100) Preschool Age (2-5 yrs) (160) School Age (6-12 yrs) (180) . Intended Audience: Psychology: Professional & Research (PS) . Tests & Measures: Play Therapy Observational Instrument; Sibling Relationship Checklists; Kinetic Family Drawing; Attachment Story Completions Task; Draw A Person: A Quantitative Scoring System; Family Relations Test: Children's Version; . Methodology: Nonclinical Case Study. References Available: Y.. Page Count: 17

KW - PsycInfo

KW - Unsupervised Play Addition

KW - assessment

KW - sibling relationships

KW - Play

KW - Art

KW - stories

KW - Measurement

KW - Play Therapy

KW - Sibling Relations

KW - Storytelling

KW - Psychological Assessment

RP - NOT IN FILE

SP - 159

EP - 175

T2 - International handbook of play therapy: Advances in assessment, theory, research, and practice

A2 - Schaefer,Charles

A2 - McCormick,Judy

A2 - Ohnogi,Akiko

CY - Lanham, MD US

PB - Jason Aronson

N2 - The author works as an independent play therapist assessing sibling relationships for court and welfare agencies. (The names, ages, and sex of the children in this group have been changed to preserve confidentiality.)

She chose to write up a case study of an assessment she carried out some time ago. The children had been separated from each other and their parents for several months when she was appointed by the court to carry out an assessment of their relationship. The children were removed from their family of origin because of severe and chronic neglect that years of intervention from the statutory agencies could not change. In addition, all four children had witnessed long-standing domestic violence and two of them had been sexually abused. The author describes the referral, assessment methodology, sibling assessment sessions, and provides a summary of the sibling relationships. (PsycINFO Database Record (c) 2012 APA, all rights reserved)

SN - 0-7657-0122-7

UR - <http://search.ebscohost.com/login.aspx?direct=true&db=psyh&AN=2005-07318-008&site=ehost-live>

ER -

TY - JOUR

ID - 1757

T1 - Response to trauma in Haitian youth at risk

A1 - Douyon, Richard

A1 - Marcelin, Louis HERNES

A1 - Jean-Gilles, MichŠle

A1 - Page, J. Bryan

Y1 - 2005///

KW - PsycInfo

KW - Unsupervised Play Addition

KW - Trauma

KW - at risk population

KW - social relations

KW - sociodemographic information

KW - Self Report

KW - Haitian youth

KW - undesirable behavior

KW - At Risk Populations

KW - Behavior

KW - Demographic Characteristics

KW - Emotional Trauma

KW - Experiences (Events)

KW - Criminal Behavior

RP - NOT IN FILE

SP - 115

EP - 138

JF - Journal of Ethnicity in Substance Abuse

VL - 4

IS - 2

CY - US

PB - Haworth Press

N2 - In order to characterize undesirable behavior (drug use, fighting, criminal activity) among Haitian youth at risk and determine the relationship between traumatic experience and that kind of behavior, investigators recruited 292 Haitian youths via networks of informal social relations in two zones of Miami/Dade County strongly identified with Haitian ethnicity. Each recruit responded to an interview schedule eliciting sociodemographic information and self-reported activities, including involvement in youth-dominated groups. They also reported traumatic experience. Clinicians administered CAPS to a subset of those respondents who self-reported traumatic experience. Staff ethnographers selected respondents for in-depth interviews and family studies to provide contextual depth for findings of the interview schedule and the CAPS assessments. Although traumatic experience may still play a role in mental health outcomes among children, childhood victimization among Haitian children does not appear to be related to the drug use and undesirable behaviors associated with unsupervised youth, including formation of gangs. (PsycINFO Database Record (c) 2012 APA, all rights reserved) (journal abstract)

SN - 1533-2659

AD - Page, J. Bryan, University of Miami, Department of Anthropology 102 Merrick (LC2005), Coral Gables, FL, US, 33124, Bryan.page@miami.edu

UR - <http://search.ebscohost.com/login.aspx?direct=true&db=psyh&AN=2005-15549-006&site=ehost-live>; Bryan.page@miami.edu

L3 - 10.1300/J233v04n02\_06

ER -

TY - CHAP

ID - 1758

T1 - After-school sport for children: Implications of a task-involving motivational climate

A1 - Duda,Joan L.

A1 - Ntounumis,Nikos

Y1 - 2005///

N1 - Accession Number: 2005-01368-014. First Author & Affiliation: Duda, Joan L.; School of Sport and Exercise Sciences, University of Birmingham, United Kingdom. Release Date: 20050214. Publication Type: Book, (0200); Edited Book, (0280); . Media Covered: Print. Document Type: Chapter. ISBN: 0-8058-4430-9, Hardcover, 0805844309; 0-8058-4431-7, Paperback, 0805844317. Language: English. Major Descriptor: Athletic Participation; Athletic Performance; Motivation; Sports; Teams. Minor Descriptor: After School Programs. Classification: Psychosocial & Personality Development (2840) Sports (3720) . Population: Human (10); Male (30); Female (40); . Location: US. Age Group: Childhood (birth-12 yrs) (100) School Age (6-12 yrs) (180) Adolescence (13-17 yrs) (200) Adulthood (18 yrs & older) (300) Young Adulthood (18-29 yrs) (320) . Intended Audience: Psychology: Professional & Research (PS) . References Available: Y.. Page Count: 20

KW - PsycInfo

KW - Unsupervised Play Addition

KW - sport activities

KW - after-school sport program

KW - athletic teams

KW - motivational climate

KW - Athletic Participation

KW - Athletic Performance

KW - Motivation

KW - Sports

KW - Teams

KW - After School Programs

RP - NOT IN FILE

SP - 311

EP - 330

T2 - Organized activities as contexts of development: Extracurricular activities, after-school and community programs

A2 - Mahoney,Joseph L.

A2 - Larson,Reed W.

A2 - Eccles,Jacquelynne S.

CY - Mahwah, NJ US

PB - Lawrence Erlbaum Associates Publishers

N2 - (from the chapter) Only about 14% of all children and adolescents who participate in sport in the United States are members of interscholastic athletic teams (which take place before or after classes but within the school setting). The largest number of youth participants are engaged in an agency-sponsored sport program. Indicating a potential growing significance of after-school sport in young people's lives, this increase in engagement in organized, community sport programs in recent years is coupled with a decreased involvement in spontaneous, unsupervised, free-play types of activities (Ewing & Seefeldt, 2002). One cannot help but wonder about the possible implications of such differential trends for how youngsters are now being socialized via their experiences in the physical domain. Moreover, as those who are more physically able are more likely to feel at home in organized sport programs (perhaps due to their more competitive features; Roberts, 1984), the ramifications of the enhanced attractiveness of after-school sport activities (in contrast to the seemingly diminished appeal of informal physical activities and games) for the development and long-term involvement of all children has yet to be determined. (PsycINFO Database Record (c) 2012 APA, all rights reserved) (chapter)

SN - 0-8058-4430-9

UR - <http://search.ebscohost.com/login.aspx?direct=true&db=psych&AN=2005-01368-014&site=ehost-live>

ER -

TY - JOUR

ID - 1759

T1 - Gibt es eine Kinder- und Jugendlichenpsychoanalyse?

A1 - Nicolaidis, Graziella

Y1 - 2005///

KW - PsycInfo

KW - Unsupervised Play Addition

KW - child psychoanalysis

KW - adolescent psychoanalysis

KW - Adolescent Psychotherapy

KW - Child Psychotherapy

KW - Psychoanalysis

RP - NOT IN FILE

SP - 368

EP - 377

JF - Zeitschrift für Psychoanalytische Theorie und Praxis/ Journal for Psychoanalytical Theory and Practice

VL - 20

IS - 4

CY - Germany

PB - Stroemfeld Verlag

N2 - Many psychoanalysts still ask if child and adolescent analysis really exist. Arguing their doubts they refer to problems with the frame and to the fact that games, drawing and acting play a more important role than talking and free associations of the adult analysis. They point out that in contrast to the adult analysis the presence of parents and their interference with the cure are real. Is there a transference neurosis, an analytic process? How does one interpret with a child? How important is the age difference that can be experienced as a seduction after all?. (PsycINFO Database Record (c) 2012 APA, all rights reserved) (journal abstract)

SN - 0169-3395

AD - Nicolaidis, Graziella, Route de Malagnon 32, CH-1208, Geneve, Switzerland, g.nicolaidis@bluewin.ch

UR - <http://search.ebscohost.com/login.aspx?direct=true&db=psych&AN=2006-08992-003&site=ehost-live;g.nicolaidis@bluewin.ch>

ER -

TY - JOUR

ID - 1760

T1 - Early Focused Attention Predicts Outcome for Children Born Prematurely

A1 - Lawson, Katharine R.

A1 - Ruff, Holly A.

Y1 - 2004/12//

KW - PsycInfo

KW - Unsupervised Play Addition

KW - early focused attention

KW - Attention

KW - cognitive function

KW - causal attention

KW - very low birth weight

KW - Birth Weight

KW - Cognitive Ability

KW - Premature Birth

KW - Selective Attention

RP - NOT IN FILE

SP - 399

EP - 406

JF - Journal of Developmental and Behavioral Pediatrics

VL - 25

IS - 6

CY - US

PB - Lippincott Williams & Wilkins

N2 - There is evidence that early focused, but not casual, attention to objects reflects concurrent regulation of attention and active learning. Because attentional abilities are of particular relevance in preterm infants, we evaluated whether early focused attention would be a better predictor of later attention and cognitive function than casual attention in 55 children born at very low birth weight. Participants were tested initially at 7 months and then at 2, 3, and/or 4/5 years of age. Focused attention was defined as the duration of concentrated examination of objects during independent play. Outcome measures were maternal ratings on standard attention-deficit hyperactivity disorder rating scales and standardized cognitive assessments. Results indicate that 7-month focused attention was predictive of reported problems in hyperactivity/ impulsivity at age 4/5 years and cognitive abilities at 2, 3, and 4/5 years; casual attention measures were not related to these outcomes. Early focused attention appears continuous with later attentional skills in at-risk infants and is related to cognitive abilities through the preschool years. (PsycINFO Database Record (c) 2012 APA, all rights reserved) (journal abstract)

SN - 1536-7312

AD - Lawson, Katharine R., Fisher Landau Center, Albert Einstein College of Medicine 1165 Morris Park Avenue, Bronx, NY, US, 10461, krlawson@aecom.yu.edu

UR - <http://search.ebscohost.com/login.aspx?direct=true&db=psych&AN=2005-01036-003&site=ehost-live;krlawson@aecom.yu.edu>

L3 - 10.1097/00004703-200412000-00003

ER -

TY - JOUR

ID - 1761

T1 - The Role of Shame in Predicting Adult Anger and Depressive Symptoms Among Victims of Child Psychological Maltreatment

A1 - Harper,Felicity W.K.

A1 - Arias,Ileana

Y1 - 2004/12//

KW - PsycInfo

KW - Unsupervised Play Addition

KW - shame

KW - adult anger

KW - child maltreatment

KW - victims

KW - depressive symptoms

KW - Gender Differences

KW - Anger

KW - Child Abuse

KW - Major Depression

KW - Victimization

KW - Human Sex Differences

RP - NOT IN FILE

SP - 367

EP - 375

JF - Journal of Family Violence

VL - 19

IS - 6

CY - Germany

PB - Springer

N2 - Previous research on child maltreatment and adult outcomes has failed to consider affective reactions to the maltreatment, which may play a critical role in victim outcomes. One such affective reaction--shame--may help to explain this relationship. In the context of maltreatment, feelings of shame are seen as a natural

extension of the helplessness experienced by many victims of child maltreatment [Finkelhor, D., and Browne, A. (1986). Initial and long-term effects: A conceptual framework. In Finkelhor, D. (ed.), *A Sourcebook on Child Sexual Maltreatment*, Sage, Newbury Park, CA, pp. 180- 198]. The current study examined the moderating role of shame in the relationship between victim reactions to child psychological maltreatment and adult anger and depressive symptoms. Results showed that shame moderated between child psychological maltreatment and adult anger for men but not for women, whereas shame moderated between child psychological maltreatment and depressive symptoms for adult women. Presence of gender-related differences suggests that gender should be considered in the design and development of therapeutic techniques for the treatment and prevention of anger and depression in adult survivors of child psychological maltreatment. (PsycINFO Database Record (c) 2012 APA, all rights reserved) (journal abstract)

SN - 1573-2851

AD - Arias, Ileana, Division of Violence Prevention, National Center for Injury Prevention and Control, Centers for Disease Control and Prevention 4770 Buford Highway, N.E., Mailstop K60, Atlanta, GA, US, 30341, iaras@cdc.gov

UR - <http://search.ebscohost.com/login.aspx?direct=true&db=psych&AN=2005-02609-004&site=ehost-live;iarias@cdc.gov>

L3 - 10.1007/s10896-004-0681-x

ER -

TY - JOUR

ID - 1764

T1 - Working with other adults: What teachers need to know

A1 - Calder, Isobel

A1 - Grieve, Ann

Y1 - 2004/06//

KW - PsycInfo

KW - Unsupervised Play Addition

KW - trained teachers

KW - classroom

KW - teacher education courses

KW - teacher's concepts

KW - Teacher Role

KW - professional identity

KW - Classrooms

KW - Concepts

KW - Preservice Teachers

KW - Student Teachers

KW - Teacher Education

KW - Role Perception

RP - NOT IN FILE

SP - 113

EP - 126

JF - Educational Studies

VL - 30

IS - 2

CY - United Kingdom

PB - Taylor & Francis

N2 - This paper discusses the concepts which trained teachers carry into the classroom from their initial teacher education courses and argues that these outmoded concepts must be altered so that the roles which other adults play can be understood by teachers. There is a common perception that teaching is a solitary activity carried out by a trained adult with a group of learners. The reality is that there is often another adult present. The paper is set in the context of classroom assistants working in Scottish primary mainstream classrooms. It concerns the way in which teachers and other adults work together to support children with behavioural difficulties. Although the data is peculiarly Scottish, the lessons learned have a wider national and international currency, for it seeks to explain the changes necessary in teachers' thinking about collaborative working. This paper argues that continuing professional development must be provided to allow teachers already in the field to consider the



effect on their professional identity produced by the presence of other adults. Most crucially, it is argued that initial teacher education must acknowledge the changes happening in mainstream classes and must include personnel and performance management training in courses for student teachers. (PsycINFO Database Record (c) 2012 APA, all rights reserved)

SN - 1465-3400

AD - Calder, Isobel, Professional Development Unit, University of Strathclyde, Faculty of Education 76 Southbrae Drive, Glasgow, United Kingdom, G13 1PP, isobel.calder@strath.ac.uk

UR - <http://search.ebscohost.com/login.aspx?direct=true&db=psyh&AN=2004-11171-002&site=ehost-live;isobel.calder@strath.ac.uk>

L3 - 10.1080/0305569032000159778

ER -

TY - JOUR

ID - 1765

T1 - The extent of children's independent mobility and the number of actualized affordances as criteria for child-friendly environments

A1 - Kytt,,Marketta

Y1 - 2004/06//

KW - PsycInfo

KW - Unsupervised Play Addition

KW - independent mobility

KW - actualized affordances

KW - child-friendly environments

KW - Childhood Development

KW - Environmental Planning

KW - Independence (Personality)

KW - Person Environment Fit

KW - Physical Mobility

RP - NOT IN FILE

SP - 179

EP - 198

JF - Journal of Environmental Psychology

VL - 24

IS - 2

CY - Netherlands

PB - Elsevier Science

N2 - Diversity of environmental resources and access to play and exploration have been regarded as the two central criteria of a child-friendly environment. The former has been operationalized in this article by the number of actualized, positive affordances and the latter by the degree of independent mobility. A hypothetical model in which the degree of independent mobility and the number of actualized affordances covary in four varying types of children's environments was constructed. The latter are called Bullerby, Wasteland, Cell, and Glasshouse. The subjects were 8-9-year-old children, who were studied by using individual interviews and questionnaires. The results indicate that all of the hypothesized environment types appeared in the data. Each neighborhood had a unique combination of affordances and independent mobility in terms of the model. The Bullerby type of setting abounded in the Finnish communities. The Cell, Wasteland and Glasshouse were the most common types of environment in the Belarushian data. In general, the proportion of Bullerby-type settings decreased and the glasshouse-type increased as the degree of urbanization augmented. The models and measures applied need further elaboration and testing in different environments and with varying groups of children. (PsycINFO Database Record (c) 2012 APA, all rights reserved)

SN - 0272-4944

AD - Kytt,, Marketta, Centre for Urban and Regional Studies, Helsinki University of Technology P.O. Box 9300, 02015, Finland, marketta.kytta@hut.fi

UR - <http://search.ebscohost.com/login.aspx?direct=true&db=psyh&AN=2004-95273-003&site=ehost-live;marketta.kytta@hut.fi>

L3 - 10.1016/S0272-4944(03)00073-2

ER -

TY - JOUR

ID - 1766

T1 - Observers' proficiency at identifying pretense acts based on behavioral cues

A1 - Richert,Rebekah A.

A1 - Lillard,Angeline S.

Y1 - 2004/04//

KW - PsycInfo

KW - Unsupervised Play Addition

KW - observer proficiency

KW - discrimination

KW - pretense behavior

KW - pretense vs real acts

KW - behavioral cues

KW - Development

KW - pretender behavior

KW - pretend content

KW - pretense interpretation

KW - CHILDREN

KW - Adults

KW - Behavior

KW - Cues

KW - Faking

KW - Reality

KW - Childhood Development

KW - Developmental Age Groups

RP - NOT IN FILE

SP - 223

EP - 240

JF - Cognitive Development

VL - 19

IS - 2

CY - Netherlands

PB - Elsevier Science

N2 - Discriminating what is pretense from what is real is a fundamental problem in development. Research has addressed the proficiency with which adults and children discriminate between play fighting and real fighting, and yet none (to our knowledge) has investigated discrimination of other kinds of pretense and real acts. In addition, little is known about what aspects of pretender behavior (as opposed to pretend content) might cue pretense interpretations. In two experiments, 8-20 s clips showing pretense and real snack behaviors were presented to adult and child participants. All participants distinguished between pretense and real behaviors at better than chance level. Furthermore, certain features (specific looking patterns and mistimed behaviors) were most prominent in the videotapes that were most often correctly identified. This provides empirical support for the suggestion that these cues, as opposed to more commonly cited cues, like smiles, might serve as important indicators of pretense for children and adults. (PsycINFO Database Record (c) 2012 APA, all rights reserved) (journal abstract)

SN - 0885-2014

AD - Lillard, Angeline S., Department of Psychology, University of Virginia 102 Gilmer Hall, P.O. Box 400400, Charlottesville, VA, US, 22904-4400, lillard@virginia.edu

UR - <http://search.ebscohost.com/login.aspx?direct=true&db=psych&AN=2004-14578-005&site=ehost-live;lillard@virginia.edu>

L3 - 10.1016/j.cogdev.2004.01.001

ER -

TY - JOUR

ID - 1767

T1 - The role of historical intuitions in children's and adults' naming of artifacts

A1 - Gutheil, Grant  
 A1 - Bloom, Paul  
 A1 - Valderrama, Nohemy  
 A1 - Freedman, Rebecca  
 Y1 - 2004/02//  
 KW - PsycInfo  
 KW - Unsupervised Play Addition  
 KW - CHILDREN  
 KW - Adults  
 KW - artifacts  
 KW - object naming  
 KW - historical intuition  
 KW - History  
 KW - Intuition  
 KW - Naming  
 KW - Object Recognition  
 KW - Childhood Development  
 RP - NOT IN FILE  
 SP - 23  
 EP - 42  
 JF - Cognition  
 VL - 91  
 IS - 1  
 CY - Netherlands  
 PB - Elsevier Science  
 N2 - It is commonly assumed that artifacts are named solely on the basis of properties they currently possess; in particular, their appearance and function. The experiments presented here explore the alternative proposal that the history of an artifact plays some role in how it is named. In three experiments, children between the ages of 4 and 9 years and adults were presented with familiar artifacts whose appearance and function were then radically altered. Participants were tested as to whether they believed that the modified objects were still members of the artifact kind. Results indicate that object history becomes increasingly important over the course of development. (PsycINFO Database Record (c) 2012 APA, all rights reserved) (journal abstract)  
 SN - 0010-0277  
 AD - Gutheil, Grant, ggutheil@skidmore.edu  
 UR - <http://search.ebscohost.com/login.aspx?direct=true&db=psyh&AN=2004-10619-002&site=ehost-live;ggutheil@skidmore.edu>  
 L3 - 10.1016/S0010-0277(03)00165-3  
 ER -  
  
 TY - JOUR  
 ID - 1768  
 T1 - The role of entrenchment in children's and adults' performance on grammaticality judgment tasks  
 A1 - Theakston, Anna L.  
 Y1 - 2004/01//  
 KW - PsycInfo  
 KW - Unsupervised Play Addition  
 KW - entrenchment  
 KW - grammaticality judgment tasks  
 KW - overgeneralization errors  
 KW - verb argument structure  
 KW - Age Differences  
 KW - children vs adults  
 KW - Cognitive Generalization  
 KW - Errors  
 KW - Grammar  
 KW - Judgment

KW - Verbs

RP - NOT IN FILE

SP - 15

EP - 34

JF - Cognitive Development

VL - 19

IS - 1

CY - Netherlands

PB - Elsevier Science

N2 - Between the ages of 3 and 7 years, children have been observed to produce verb argument structure overgeneralization errors. A number of recent studies have begun to find evidence that the precise distributional properties of the input may provide an important part of the explanation for why children retreat from overgeneralization errors. This study evaluates the role of entrenchment in constraining argument structure overgeneralization errors using a grammaticality judgment task. Five-yr-old, 8-yr-old, and adult Ss were presented with examples of argument structure errors containing high and low frequency verbs matched for semantic class and asked to indicate whether, or the extent to which they found the sentences to be grammatical. The data show that across all groups, sentences with argument structure errors containing low frequency verbs were judged to be significantly more grammatical than those containing high frequency verbs. These findings provide further support for the entrenchment hypothesis and suggest that verb frequency plays an important and continuing role in determining a speaker's choice of verb argument structure. (PsycINFO Database Record (c) 2012 APA, all rights reserved)

SN - 0885-2014

AD - Theakston, Anna L., Department of Psychology, University of Manchester Oxford Road, Manchester, United Kingdom, M13 9PL, theaksto@psy.man.ac.uk

UR - <http://search.ebscohost.com/login.aspx?direct=true&db=psyh&AN=2004-11189-002&site=ehost-live;theaksto@psy.man.ac.uk>

L3 - 10.1016/j.cogdev.2003.08.001

ER -

TY - THES

ID - 1770

T1 - Childhood sexual abuse and adult defensive functioning

A1 - Callahan, Kelley Lynn

Y1 - 2004///

N1 - Accession Number: 2004-99004-399. First Author & Affiliation: Callahan, Kelley Lynn; Adelphi U, Inst Advanced Psychological Studies, US. Other Journal Titles: Dissertation Abstracts International. Release Date: 20040802. Publication Type: Dissertation Abstract, (0400); . Media Covered: Electronic. Document Type: Dissertation. Dissertation Number: AAI3103522. Language: English. Major Descriptor: Adult Attitudes; Child Abuse; Defense Mechanisms; Sexual Abuse. Classification: Health & Mental Health Treatment & Prevention (3300) . Population: Human (10); . Age Group: Childhood (birth-12 yrs) (100) Adulthood (18 yrs & older) (300) . Methodology: Empirical Study. Page Count: 1

KW - PsycInfo

KW - Unsupervised Play Addition

KW - childhood sexual abuse

KW - adult defensive functioning

KW - Adult Attitudes

KW - Child Abuse

KW - Defense Mechanisms

KW - Sexual Abuse

RP - NOT IN FILE

JF - Dissertation Abstracts International: Section B: The Sciences and Engineering

VL - 64

IS - 8-B

CY - US

PB - ProQuest Information & Learning

N2 - Although numerous studies have documented symptoms experienced by survivors of childhood sexual abuse (CSA), few studies have sought to investigate the dynamics that contribute to particular symptom presentations in adulthood. A growing body of empirical evidence suggests that defense mechanisms play an integral role in development. Based on a developmental model of psychopathology addressing the effects of CSA on self and social functioning (Cole & Putnam, 1992), this study sought to investigate differences in adult defensive functioning between outpatients with and without a history of CSA. Participants were 71 treatment-seeking individuals enrolled in an ongoing treatment process and outcome study (Hilsenroth, 2000). Clinicians utilized the Abuse Dimensions Inventory, Sexual Abuse Behaviors scale (ADI; Chaffin, Wherry, Newlin, Crutchfield, & Dykman, 1997), to rate the presence, absence, and severity of CSA experiences (CSA group n = 23; non-CSA group n = 48). Clinicians rated participants' defensive functioning using the Defensive Functioning Scale (DFS; American Psychiatric Association, 1994). A personality disorder index was also utilized to characterize personality psychopathology in a dimensional manner. An external rater also rated participants' CSA experiences, defensive functioning, and personality psychopathology. Interrater reliability for the ADI and personality disorder index was excellent. Interrater reliability on the DFS was largely in the good to excellent range. The CSA group used the Major Image-Distorting level of defense, an immature level of defense characterized by the distortion/misattribution of self-image or the image of others (APA, 1994), significantly more than the non-CSA group. Post-Hoc analysis of individual defenses within the Major Image-Distorting level suggested a significantly greater use of projective identification by the CSA group than the non-CSA group. Similarly, Major Image-Distorting was the only level of defense related to abuse severity, such that more severe abuse was associated with greater use of Major Image-Distorting defenses. The CSA and non-CSA group were not found to significantly differ in personality disorder psychopathology. Findings suggest that the use of specific immature defense mechanisms may contribute to difficulties in maintaining a complex, coherent, and regulated sense of self and problems in interpersonal relations that are frequently seen in clinical samples of adult survivors of CSA. (PsycINFO Database Record (c) 2012 APA, all rights reserved)

SN - 0419-4217

UR - <http://search.ebscohost.com/login.aspx?direct=true&db=psyh&AN=2004-99004-399&site=ehost-live>

ER -

TY - JOUR

ID - 1771

T1 - Robot-mediated joint attention in children with autism: A case study in robot-human interaction

A1 - Robins,Ben

A1 - Dickerson,Paul

A1 - Stribling,Penny

A1 - Dautenhahn,Kerstin

Y1 - 2004///

KW - PsycInfo

KW - Unsupervised Play Addition

KW - robot-human interaction

KW - CHILDREN

KW - Autism

KW - Rehabilitation

KW - Therapy

KW - Education

KW - robot-mediated joint attention

KW - Attention

KW - Human Computer Interaction

KW - Robotics

RP - NOT IN FILE

SP - 161

EP - 198

JF - Interaction Studies: Social Behaviour and Communication in Biological and Artificial Systems

VL - 5

IS - 2

CY - Netherlands

PB - John Benjamins

N2 - Interactive robots are used increasingly not only in entertainment and service robotics, but also in rehabilitation, therapy and education. The work presented in this paper is part of the Aurora project, rooted in assistive technology and robot-human interaction research. Our primary aim is to study if robots can potentially be used as therapeutically or educationally useful 'toys'. In this paper we outline the aims of the project that this study belongs to, as well as the specific qualitative contextual perspective that is being used. We then provide an in-depth evaluation, in part using Conversation Analysis (CA), of segments of trials where three children with autism interacted with a robot as well as an adult. We focus our analysis primarily on joint attention which plays a fundamental role in human development and social understanding. Joint attention skills of children with autism have been studied extensively in autism research and therefore this behaviour provides a relevant focus for our study. In the setting used, joint attention emerges from natural and spontaneous interactions between a child and an adult. We present the data in the form of transcripts and photo stills. The examples were selected from extensive video footage for illustrative purposes, i.e. demonstrating how children with autism can respond to the changing behaviour of their co-participant, i.e. the experimenter. Furthermore, our data shows that the robot provides a salient object, or mediator for joint attention. The paper concludes with a discussion of implications of this work in the context of further studies with robots and children with autism within the Aurora project, as well as the potential contribution of robots to research into the nature of autism. (PsycINFO Database Record (c) 2012 APA, all rights reserved) (journal abstract)

SN - 1572-0381

AD - Robins, Ben, Adaptive Systems Research Group, University of Hertfordshire College Lane, Hatfield, Hertfordshire, United Kingdom, AL10 9AB, B.1.Robins@herts.ac.uk

UR - <http://search.ebscohost.com/login.aspx?direct=true&db=psyh&AN=2005-01243-001&site=ehost-live>;B.1.Robins@herts.ac.uk

L3 - 10.1075/is.5.2.02rob

ER -

TY - JOUR

ID - 1772

T1 - Childhood Adversity and Later Mortality in an Urban African American Cohort

A1 - Juon,Hee Soon

A1 - Ensminger,Margaret E.

A1 - Feehan,Michael

Y1 - 2003/12//

KW - PsycInfo

KW - Unsupervised Play Addition

KW - Mortality

KW - childhood factors

KW - Foster Care

KW - African American Children

KW - family factors

KW - adversity

KW - Childhood Development

KW - Early Experience

KW - Family Background

KW - Mortality Rate

KW - Risk Factors

KW - Blacks

KW - Urban Environments

RP - NOT IN FILE

SP - 2044

EP - 2046

JF - American Journal of Public Health

JA - Am J Public Health

VL - 93

IS - 12

CY - US

PB - American Public Health Assn

N2 - In this article, we examine family and childhood factors in relation to the risk of later mortality. Data were obtained from the children's teachers and mothers when the children were 6 years old and from study participants themselves at ages 16-17 years and 32-34 years. Information on death was obtained from family members and neighbors. Four family types were defined by the adults who were present in the household. First-grade teachers rated the children's behavior on scales indicating aggressive and shy behavior. A 4-point measure ranging from shy to aggressive was used. Psychological symptoms were measured by the 38-item Mother's Symptom Inventory (MSI). Of the 1242 first graders, 1040 were located for adult follow-up. Of the 202 not located, 51 were known to be alive; the status of the remaining 151 was unknown. Of the 1091 cohort members whose status was known at follow-up, 44 had died by the time of the adult assessment. Among the 44 deaths, homicide was the most frequent identifiable cause of death. These findings raise the question whether foster care is responsible for or plays a causal role in those deaths. Policies for foster care could be designed that might decrease the risk. (PsycINFO Database Record (c) 2012 APA, all rights reserved)

SN - 1541-0048

AD - Juon, Hee-Soon, Department of Health Policy and Management, Johns Hopkins Bloomberg School of Public Health 624 N. Broadway, Baltimore, MD, US, 21205, hjuon@jhsph.edu

UR - <http://search.ebscohost.com/login.aspx?direct=true&db=psych&AN=2003-10418-002&site=ehost-live>;hjuon@jhsph.edu

L3 - 10.2105/AJPH.93.12.2044

ER -

TY - JOUR

ID - 1773

T1 - Video technology and persons with autism and other developmental disabilities: An emerging technology for PBS

A1 - Sturmey, Peter

Y1 - 2003///

KW - PsycInfo

KW - Unsupervised Play Addition

KW - Video Technology

KW - autistic children

KW - Developmental Disabilities

KW - Teaching

KW - Autism

KW - Teaching Methods

KW - Technology

KW - Videotape Instruction

RP - NOT IN FILE

SP - 3

EP - 4

JF - Journal of Positive Behavior Interventions

VL - 5

IS - 1

CY - US

PB - PRO-ED

N2 - Introduces four articles (see records 2002-08658-004, 200208658-005, 200208658-006, 200208658-007, and 200208658-008) which demonstrate that video technology can be a powerful tool for teaching appropriate social behavior, independent play, and academic tasks to children with autistic disorder. (PsycINFO Database Record (c) 2012 APA, all rights reserved)

SN - 1538-4772

UR - <http://search.ebscohost.com/login.aspx?direct=true&db=psych&AN=2002-08658-003&site=ehost-live>

L3 - 10.1177/10983007030050010401

ER -

TY - CHAP

ID - 1775

T1 - Projects and policies for childhood in Italy

A1 - Rissotto, Antonella

Y1 - 2003///

N1 - Accession Number: 2004-00314-022. First Author & Affiliation: Rissotto, Antonella; Institute of Cognitive Sciences and Technologies, National Research Council, Rome, Italy. Release Date: 20060221. Correction Date: 20100329. Publication Type: Book, (0200); Edited Book, (0280); . Media Covered: Print. Document Type: Chapter. ISBN: 0-88937-282-9, Hardcover, 0889372829. Language: English. Conference Information: International Association for People-Environment Studies Conference. Major Descriptor: Child Care; Community Development; Community Involvement; Government Policy Making; Urban Environments. Minor Descriptor: Childhood Play Development; Human Rights. Classification: Community & Environmental Planning (4050) . Population: Human (10); Male (30); Female (40); . Location: Italy. Age Group: Childhood (birth-12 yrs) (100) Preschool Age (2-5 yrs) (160) School Age (6-12 yrs) (180) Adolescence (13-17 yrs) (200) . Intended Audience: Psychology: Professional & Research (PS) . Methodology: Empirical Study. References Available: Y.. Page Count: 13

KW - PsycInfo

KW - Unsupervised Play Addition

KW - urban environment

KW - children's empowerment

KW - independent mobility

KW - children's participation

KW - network of cities

KW - legislative actions

KW - evaluation of Children's City project

KW - Child Care

KW - Community Development

KW - Community Involvement

KW - Government Policy Making

KW - Urban Environments

KW - Childhood Play Development

KW - Human Rights

RP - NOT IN FILE

SP - 299

EP - 311

T2 - Culture, environmental action and sustainability

A2 - Garc  Mira, Ricardo

A2 - Sabucedo Cameselle, Jos, M.

A2 - Romay Martınez, Jos,

CY - Ashland, OH US

PB - Hogrefe & Huber Publishers

N2 - (from the chapter) This contribution has two aims. First to briefly describe the cultural and legislative context produced in Italy by the ratification of the United Nations Convention on the Rights of the Child. Second to present some of the outcomes of the Children's City project. This project was started in 1991 and today it involves 46 cities in Italy, several in Argentina and a few in Spain. It is aimed at improving the urban environment from the perspective of children. The study of actions carried out by the Italian cities in order to promote children's participation and children's autonomous mobility highlights the positive and negative aspects of the project. The main limits of the project are connected with the following factors: project's dependence on temporary tasks of politicians; the emphasis given to the educational dimension of interventions which shifts attention away from the city's transformation and from children's empowerment; the experimental character of the interventions which results in reduced impact on the urban environment and on the child population. The main positive aspects of the project are related to changes in the perception of childhood, which motivate administrators to make innovative choices and encourages the engagement of larger components of the community. (PsycINFO Database Record (c) 2012 APA, all rights reserved) (chapter)

SN - 0-88937-282-9

AD - Rissotto, Antonella, Institute of Cognitive Sciences and Technologies, National Research Council Viale K. Marx 15, 00137, Rome, Italy, rissotto@ip.rm.cnr.it

UR - <http://search.ebscohost.com/login.aspx?direct=true&db=psych&AN=2004-00314-022&site=ehost->  
[liver; rissotto@ip.rm.cnr.it](http://search.ebscohost.com/login.aspx?direct=true&db=psych&AN=2004-00314-022&site=ehost-)



ER -

TY - CHAP

ID - 1776

T1 - Encouraging independent play skills

A1 - Christophersen,Edward R.

A1 - Mortweet,Susan L.

Y1 - 2003///

N1 - Accession Number: 2003-07192-010. First Author & Affiliation: Christophersen, Edward R.; Children's Mercy Hosp, Kansas City, MO, US. Release Date: 20031027. Publication Type: Book, (0200); Authored Book, (0240); . Media Covered: Print. Document Type: Chapter. ISBN: 1-55798-924-9, Paperback, 1557989249.

Language: English. Major Descriptor: Childhood Development; Childhood Play Behavior; Parent Training.

Classification: Childrearing & Child Care (2956) . Population: Human (10); . Age Group: Childhood (birth-12 yrs) (100) Adulthood (18 yrs & older) (300) . Intended Audience: General Public (GP) . References Available:

Y.. Page Count: 11

KW - PsycInfo

KW - Unsupervised Play Addition

KW - independent play skills

KW - Development

KW - self-entertainment

KW - CHILDREN

KW - Parent Training

KW - Childhood Development

KW - Childhood Play Behavior

RP - NOT IN FILE

SP - 195

EP - 205

T2 - Parenting that works: Building skills that last a lifetime

CY - Washington, DC US

PB - American Psychological Association

N2 - (from the chapter) "Independent play skills" refers to a child's ability to entertain himself for extended periods of time without any help from an adult. Children with well-developed independent play skills derive enjoyment simply from their activities, with no need or expectation of the involvement of others or an external reward. Independent play skills enable children to do long homework assignments, to work in their seats at school, to complete independent projects, to read a long book, and to master a hobby or talent. In addition to developing a child's ability to concentrate, stick with tasks, and enjoy time alone, independent play skills also have other benefits for the child and her parents. Children with independent play skills usually play better with other children than those who do not. This chapter describes how parents can encourage the development of independent plays skills in their children. The authors provide general guidelines as well as age-specific suggestions from infancy through school age. (PsycINFO Database Record (c) 2012 APA, all rights reserved) (chapter)

SN - 1-55798-924-9

UR - <http://search.ebscohost.com/login.aspx?direct=true&db=psyh&AN=2003-07192-010&site=ehost-live>

ER -

TY - CHAP

ID - 1777

T1 - Accessibility or obstacles? Children's independent mobility and valuation of the outdoor environment

A1 - Heurlin-Norinder,Mia

Y1 - 2003///

N1 - Accession Number: 2003-00929-012. First Author & Affiliation: Heurlin-Norinder, Mia; Stockholm Inst of Education, The Dept of Society, Culture & Learning, Research Group in Environmental Psychology & Education, Stockholm, Sweden. Release Date: 20031014. Publication Type: Book, (0200); Edited Book, (0280);

. Media Covered: Print. Document Type: Chapter. ISBN: 0-88937-263-2, Paperback, 0889372632. Language: English. Major Descriptor: Aesthetic Preferences; Community Development; Commuting (Travel);

Psychosocial Factors; Spatial Organization. Minor Descriptor: Child Attitudes; Safety. Classification:

Community & Environmental Planning (4050) . Population: Human (10); . Age Group: Childhood (birth-12 yrs) (100) Preschool Age (2-5 yrs) (160) School Age (6-12 yrs) (180) . Intended Audience: Psychology: Professional & Research (PS) . Methodology: Empirical Study; Quantitative Study. References Available: Y.. Page Count: 12

KW - PsycInfo

KW - Unsupervised Play Addition

KW - Child Attitudes

KW - neighborhood design preferences

KW - Psychosocial Factors

KW - independent mobility

KW - Safety

KW - commuting

KW - Aesthetic Preferences

KW - Community Development

KW - Commuting (Travel)

KW - Spatial Organization

RP - NOT IN FILE

SP - 161

EP - 172

T2 - People, places, and sustainability

A2 - Moser,Gabriel

A2 - Pol,Enric

A2 - Bernard,Yvonne

A2 - Bonnes,Mirilia

A2 - Corraliza,Jos, Antonio

A2 - Giuliani,Maria Vittoria

CY - Ashland, OH US

PB - Hogrefe & Huber Publishers

N2 - (from the chapter) The author shows that children's design preferences for neighbourhoods are related to their degree of independent mobility and how they evaluate their environment. Analyses point to differences concerning the interaction with the physical environment and social aspects of the neighbourhood environment, in terms of affordances and individual evaluations. In the first study 732 children (8 and 11 years old) in 9 schools filled in questionnaires concerning, for example, how they had come to school on that particular day, how they used to travel to activities after school, if they were allowed to visit friends and go out and play without being followed by any adults. The children also made drawings showing their way to school. The aim of the second, qualitative study was to get a deeper understanding of differences that were found in the first study, but also the meaning of the neighbourhood's planning and characteristics related to children's independent mobility. Traffic-separated areas seem to be very positive for children's independent mobility, but they are not enough if you want the neighbourhood to be stimulating, developing and safe. There is more to it. (PsycINFO Database Record (c) 2012 APA, all rights reserved) (chapter)

SN - 0-88937-263-2

AD - Heurlin-Norinder, Mia, Stockholm Inst of Education, The Dept of Society, Culture & Learning, Research Group in Environmental Psychology & Education Box 34103, S-100 26, Stockholm, Sweden

UR - <http://search.ebscohost.com/login.aspx?direct=true&db=psyh&AN=2003-00929-012&site=ehost-live>

ER -

TY - CHAP

ID - 1778

T1 - Rural children's play in the natural environment

A1 - Beach,Betty A.

Y1 - 2003///

N1 - Accession Number: 2003-06677-010. First Author & Affiliation: Beach, Betty A.; University of Maine, Farmington, ME, US. Translated Book Series Title: Play & culture studies, Vol. 5. Release Date: 20031020. Publication Type: Book, (0200); Edited Book, (0280); . Media Covered: Print. Document Type: Chapter. ISBN: 1-56750-684-4, Hardcover, 1567506844. Language: English. Major Descriptor: Childhood Play Behavior; Rural Environments. Minor Descriptor: Childhood Play Development; Recreation. Classification: Psychosocial &

Personality Development (2840) . Population: Human (10); Male (30); Female (40); . Location: US. Age Group: Childhood (birth-12 yrs) (100) . Intended Audience: Psychology: Professional & Research (PS) . Methodology: Empirical Study; Qualitative Study. References Available: Y.. Page Count: 12

KW - PsycInfo

KW - Unsupervised Play Addition

KW - rural children

KW - rural communities

KW - natural habitat

KW - Play

KW - Childhood Play Behavior

KW - Rural Environments

KW - Childhood Play Development

KW - Recreation

RP - NOT IN FILE

SP - 183

EP - 194

T2 - Play and educational theory and practice

A2 - Lytle,Donald E.

CY - Westport, CT US

PB - Praeger Publishers/Greenwood Publishing Group

T3 - Play & culture studies, Vol. 5

N2 - As children's play becomes increasingly domesticated and regimented by adults, limited to boundaries established and overseen by adults, pressured by commercial interests, and subject to intensifying demands for academic achievement, it is reasonable to inquire whether unfettered play still exists. The current study was undertaken to expand the knowledge of rural children's encounters with their natural habitat. The author reports on 100 hrs of naturalistic observation of children under the age of 12 at play in 2 rural communities, semi-structured interviews with 15 adults, and analysis of local historical and municipal documents. Historical and municipal documents were analyzed to create a more complete understanding of the conditions and changing context of play in the 2 communities. Results show that rural children are still visibly roaming their communities in a free-ranging manner, generally unaccompanied by adults. It is concluded that in perhaps the ultimate irony, adults may be busily circumscribing children's play while simultaneously remembering their own unrestrained childhoods with nostalgia. (PsycINFO Database Record (c) 2012 APA, all rights reserved)

SN - 1-56750-684-4

UR - <http://search.ebscohost.com/login.aspx?direct=true&db=psyh&AN=2003-06677-010&site=ehost-live>

ER -

TY - BOOK

ID - 1779

T1 - Parenting that works: Building skills that last a lifetime

A1 - Christophersen,Edward R.

A1 - Mortweet,Susan L.

Y1 - 2003///

N1 - Accession Number: 2003-07192-000. First Author & Affiliation: Christophersen, Edward R.; Children's Mercy Hosp, Kansas City, MO, US. Release Date: 20031027. Publication Type: Book, (0200); Authored Book, (0240); . Media Covered: Print. ISBN: 1-55798-924-9, Paperback, 1557989249. Language: English. Major Descriptor: Parent Child Relations; Parent Training; Parenting Skills. Minor Descriptor: Behavior Modification; Child Discipline; Coping Behavior; Parent Child Communication. Classification: Childrearing & Child Care (2956) . Population: Human (10); . Age Group: Childhood (birth-12 yrs) (100) Adulthood (18 yrs & older) (300) . Intended Audience: General Public (GP)

KW - PsycInfo

KW - Unsupervised Play Addition

KW - Parenting

KW - Parenting Skills

KW - Feedback

KW - Communication

KW - Discipline

KW - behavior management  
KW - parent coping  
KW - child coping  
KW - long-term plan  
KW - Parent Child Relations  
KW - Parent Training  
KW - Behavior Modification  
KW - Child Discipline  
KW - Coping Behavior  
KW - Parent Child Communication  
RP - NOT IN FILE  
CY - Washington, DC US

PB - American Psychological Association

N2 - (from the introduction) Takes the position that, from the beginning, we are training our children to be adults--adults with whom we would like to interact regularly, and whose company we anticipate and enjoy. Effective parenting requires that you have a long-term plan for what you want to teach your child about appropriate behavior and that you have daily interactions with your child that foster the characteristics you find important. The basic approach in this book involves helping you use your time, energy, and introspection to decide now what skills you want your child to have in 10 years. The book is divided into sections on parenting skills and on child skills. Part I discusses building your skills as a parent, including encouraging appropriate behaviors in your child, providing your child with positive feedback, communicating with your child, using effective discipline strategies, and developing vital parent coping skills. Part II provides suggestions for managing your child's behavior in public, choosing toys and games for your child, and helping your child cope with divorce. Part III discusses building your child's skills, with particular reference to self-quieting skills and independent play skills. Part IV addresses problems with bedtime, toileting, aggression, and whining and tantrums. (PsycINFO Database Record (c) 2012 APA, all rights reserved) (introduction)

SN - 1-55798-924-9

UR - <http://search.ebscohost.com/login.aspx?direct=true&db=psych&AN=2003-07192-000&site=ehost-live>  
ER -

TY - JOUR

ID - 1780

T1 - The curriculum experiences of pre-school children in Northern Ireland: Classroom practices in terms of child-initiated play and adult-directed activities

A1 - Guimaraes,Sofia

A1 - McSherry,Kathleen

Y1 - 2002/06//

KW - PsycInfo

KW - Unsupervised Play Addition

KW - Curriculum

KW - child play

KW - adult direction

KW - class activity

KW - preschools

KW - private day nursery

KW - nursery school

KW - playgroups

KW - reception class

KW - preschoolers

KW - Childhood Play Behavior

KW - Preschool Education

KW - Preschool Students

KW - Teaching

KW - Nursery Schools

RP - NOT IN FILE

SP - 85

EP - 94

JA - International Journal of Early Years Education

VL - 10

IS - 2

CY - United Kingdom

PB - Taylor &amp; Francis

N2 - Examined the curriculum approaches, in relation to child-initiated play vs adult-directed activities, experienced by children across different types of pre-school provision in Northern Ireland. Observations were carried out in 71 pre-school settings including private day nurseries, nursery schools/classes, playgroups, and reception classes. Each center was observed for a complete session during a 'typical' day. A record was taken of the activities in which the children took part and their contexts/settings were noted, as were the number of adults and children present, the nature of the adult involvement together with the time spent on the activities. The children observed were between 3 and 4 yrs of age. The results show that the type of center was associated with the types of activities promoted in terms of adult- vs child-initiated activities. The pre-school curriculum offered in most reception settings was strongly based on an adult-directed approach while most nursery classes/schools, playgroups, and private day nurseries adopted a child-initiated approach. The results are discussed in relation to what constitutes a developmentally appropriate pre-school curriculum. (PsycINFO Database Record (c) 2012 APA, all rights reserved)

SN - 1469-8463

UR - <http://search.ebscohost.com/login.aspx?direct=true&db=psyh&AN=2002-15121-001&site=ehost-live>

L3 - 10.1080/09669760220141971

ER -

TY - JOUR

ID - 1781

T1 - A script-based symbolic play intervention for children with developmental delay

A1 - Nevile, Maryann

A1 - Bachor, Dan G.

Y1 - 2002///

KW - PsycInfo

KW - Unsupervised Play Addition

KW - symbolic play intervention

KW - script based

KW - developmental delay

KW - CHILDREN

KW - independent play

KW - peer play

KW - Childhood Play Behavior

KW - Delayed Development

KW - Intervention

KW - Schema

KW - Symbolism

KW - Peers

RP - NOT IN FILE

SP - 140

EP - 172

JF - Developmental Disabilities Bulletin

VL - 30

IS - 2

CY - Canada

PB - JP Das Development Disabilities Centre

N2 - We implemented a single-case research design, using an A B A post check format, to examine the effects of a script-based symbolic play intervention in two contexts (independent play and playing with peers) with five boys who exhibited developmental delay and were situated in an inclusive classroom setting. Four of the five boys produced gains in mean performance over baseline levels in both play contexts and in each phase of the study. Participants also maintained treatment effects two months after the intervention. Symbolic play skills

occurred more frequently in independent play than in shared play. The positive effects of modeling and transition training to promote generalization between contexts were supported. A relationship was observed between the frequency of language production and symbolic play. Diversity of language decreased with increased word production for two participants while four of the participants exhibited a trend toward more mature social interaction with peers. (PsycINFO Database Record (c) 2012 APA, all rights reserved) (journal abstract)

SN - 1184-0412

AD - Bachor, Dan G., Department of Educational Psychology and Leadership Studies, Faculty of Education, University of Victoria , Victoria, BC, Canada, V8W 3N4, dbachor@uvic.ca

UR - <http://search.ebscohost.com/login.aspx?direct=true&db=psych&AN=2003-07551-002&site=ehost-live>;dbachor@uvic.ca

ER -

TY - CHAP

ID - 1782

T1 - The various roles of municipal leaders

A1 - Ouellette,Mark

A1 - Kyle,John E.

Y1 - 2002///

N1 - Accession Number: 2003-02186-008. First Author & Affiliation: Ouellette, Mark; National League of Cities' Inst for Youth, Education, and Families, Washington, DC, US. Translated Book Series Title: New directions for youth development: Theory practice research. Release Date: 20030825. Publication Type: Book, (0200); Edited Book, (0280); . Media Covered: Print. Document Type: Chapter. Book Type: Reference Book. ISBN: 0-7879-6337-2, Paperback, 0787963372. Language: English. Major Descriptor: After School Programs; Child Self Care; Leadership; Politicians; Urban Environments. Minor Descriptor: Adolescent Development; Childhood Development; Community Services. Classification: Community & Social Services (3373) . Population: Human (10); . Age Group: Childhood (birth-12 yrs) (100) Adolescence (13-17 yrs) (200) . Intended Audience: Psychology: Professional & Research (PS) . Page Count: 8

KW - PsycInfo

KW - Unsupervised Play Addition

KW - after-school hours

KW - lack of supervision

KW - CHILDREN

KW - Adolescents

KW - empty house

KW - community-wide strategies

KW - municipal officials

KW - Leadership

KW - After School Programs

KW - Child Self Care

KW - Politicians

KW - Urban Environments

KW - Adolescent Development

KW - Childhood Development

KW - Community Services

RP - NOT IN FILE

SP - 125

EP - 132

T2 - Youth development and after-school time: A tale of many cities

A2 - Noam,Gil G.

A2 - Miller,Beth M.

CY - San Francisco, CA US

PB - Jossey-Bass

T3 - New directions for youth development: Theory practice research

N2 - (from the chapter) An estimated 8 million children between the ages of 5 and 14 yrs go home to an empty house on a regular basis. Many of these children are left alone for as many as 4 hours a day. For cities and towns

across America, these unsupervised hours after school mean both heightened risk and missed opportunities. Leadership from municipal officials is usually required to forge a community-wide strategy that works for all children. Municipal officials can play an important role in developing a community-wide after-school system and serve as catalysts for far-reaching efforts that address key challenges: promoting partnerships, building public will, assessing local resources and needs, improving quality, broadening access, and developing financing strategies. (PsycINFO Database Record (c) 2012 APA, all rights reserved) (chapter)

SN - 0-7879-6337-2

UR - <http://search.ebscohost.com/login.aspx?direct=true&db=psyh&AN=2003-02186-008&site=ehost-live>  
ER -

TY - JOUR

ID - 1783

T1 - The influence of psychosocial and environmental factors on children's independent mobility and relationship to peer frequentation

A1 - Prezza, Miretta

A1 - Pilloni, Stefania

A1 - Morabito, Carmela

A1 - Sersante, Cinzia

A1 - Alparone, Francesca Romana

A1 - Giuliani, Maria Vittoria

Y1 - 2001/11//

KW - PsycInfo

KW - Unsupervised Play Addition

KW - Demographic Characteristics

KW - psychosocial characteristics

KW - environmental factors

KW - independent urban mobility

KW - Play

KW - CHILDREN

KW - Mothers

KW - Childhood Play Behavior

KW - Independence (Personality)

KW - Psychosocial Factors

KW - Urban Environments

RP - NOT IN FILE

SP - 435

EP - 450

JF - Journal of Community & Applied Social Psychology

VL - 11

IS - 6

CY - US

PB - John Wiley & Sons

N2 - The first aim of this study was to investigate whether demographic characteristics of children (i.e. age, sex, birth order), mothers' psychosocial characteristics (i.e. fear of crime, neighbourhood relations, sense of community, perceived risk of traffic) and environmental factors (i.e. living in a new/old neighbourhood, in a building with a condominium courtyard, near a park or in a private street) influence the independent urban mobility of 7-12-yr-old children. The second aim was to verify whether children who are more independent meet their peers more frequently for indoor and outdoor play. A semi-structured interview, the Italian Sense of Community Scale and a Neighbourhood Relations scale were administered to 251 mothers (mean age 39 yrs) living in Rome. The results indicate that more independent children are older, male, live in apartment buildings with courtyards, near parks and in new neighbourhoods. Also, their mothers have more neighbourhood relations. Regarding the second aim, it emerged that children who are more independent play more often with their peers, both indoors and outdoors. (PsycINFO Database Record (c) 2012 APA, all rights reserved)

SN - 1099-1298

AD - Prezza, Miretta, Dept of Psychology, U 'La Sapienza' Via dei Marsi, 78, 00185, Rome, Italy,  
miretta.prezza@uniroma1.it

UR - <http://search.ebscohost.com/login.aspx?direct=true&db=psyh&AN=2001-09820-003&site=ehost-live>;miretta.prezza@uniroma1.it

L3 - 10.1002/casp.643

ER -

TY - THES

ID - 1784

T1 - Training family therapists to work with children in family therapy: A modified Delphi study

A1 - Sori, Catherine Ellen Ford

Y1 - 2001/01//

N1 - Accession Number: 2001-95023-090. First Author & Affiliation: Sori, Catherine Ellen Ford; Purdue U., US. Other Journal Titles: Dissertation Abstracts International. Release Date: 20020417. Publication Type: Dissertation Abstract, (0400); . Media Covered: Electronic. Document Type: Dissertation. Dissertation Number: AAI3018272. Language: English. Major Descriptor: Family Therapy; Marriage Counseling; Psychotherapy Training. Classification: Health & Mental Health Treatment & Prevention (3300) . Population: Human (10); . Age Group: Adulthood (18 yrs & older) (300) . Methodology: Empirical Study. Page Count: 1

KW - PsycInfo

KW - Unsupervised Play Addition

KW - Family Therapy

KW - marriage therapy

KW - child focused therapy training

KW - Delphi methodology

KW - Marriage Counseling

KW - Psychotherapy Training

RP - NOT IN FILE

JF - Dissertation Abstracts International Section A: Humanities and Social Sciences

VL - 62

IS - 6-A

CY - US

PB - ProQuest Information & Learning

N2 - The field of marriage and family therapy must address the needs of all family members, including young children. Yet research indicates that many MFTs do not feel adequately trained or comfortable to work with children, and many exclude children from family therapy sessions. The purpose of this study was to gather a consensus of recommendations from experts in the field on how to improve child-focused training. A modified Delphi methodology was used to collect both quantitative and qualitative data. Based on previous research, six open-ended questions were posed on Delphi I. Four panelists participated in qualitative interviews to clarify responses. Delphi II contained panelists responses to Delphi I and comments from panelist interviews for some items. Following Delphi II, six more qualitative interviews were conducted to address discrepancies in the data. Finally, a qualitative interview was conducted with Salvador Minuchin, who reflected on these results and offered his thoughts on this topic. Panelists believed that children should be active participants in family therapy sessions for both child and adult presenting problems. They should only be excluded during adult sexual discussions, or initially when parents are discussing how to share sensitive information. Child-focused course content should emphasize developmental issues, practical techniques to engage children and families, theoretical issues, play therapy theory, MFT treatment for child disorders, and specific issues that impact children and families. Panelists only recommended one reference for child coursework. Therapist attributes and relational skills are essential skills for MFTs to develop. Panelists recommend both deductive and inductive training methods and highlight the role of supervision to increase therapist comfort and skills with children. Therapist playfulness and creativity are important considerations in training, but no specific play therapy techniques were recommended. Minuchin discussed these findings in light of historical aspects of training and recent developments in the field. Implications for training programs and for the field are discussed. (PsycINFO Database Record (c) 2012 APA, all rights reserved)

SN - 0419-4209

UR - <http://search.ebscohost.com/login.aspx?direct=true&db=psyh&AN=2001-95023-090&site=ehost-live>

ER -

TY - JOUR



ID - 1785

T1 - Played out? Passive behavior by children with Down syndrome during unstructured play

A1 - Linn,Margaret Inman

A1 - Goodman,Joan F.

A1 - Lender,Winifred Lloyds

Y1 - 2000///

KW - PsycInfo

KW - Unsupervised Play Addition

KW - passivity

KW - child play behavior

KW - Down Syndrome

KW - Childhood Play Behavior

KW - Down's Syndrome

KW - Passiveness

RP - NOT IN FILE

SP - 264

EP - 278

JF - Journal of Early Intervention

VL - 23

IS - 4

CY - US

PB - Council for Exceptional Children

N2 - Investigated the duration, frequency, and trajectory of passive behavior during play in children with Down syndrome. 14 children with Down syndrome (mean age 54 mo) were observed during 30-60-min independent play sessions, with passive episodes noted. Results show that Down syndrome Ss spent more time in passive behavior and shifted from play to passivity and back to play more often than did control Ss during the initial 30 min of play. No difference between Down syndrome Ss and controls was found for the time spent in social activities, but Down syndrome Ss exhibited greater frequency of social behavior. Down syndrome Ss spent more time in passivity as time progressed over the play period, whereas controls showed a decline in amount of time spent passively as the play period progressed. (PsycINFO Database Record (c) 2012 APA, all rights reserved)

SN - 1053-8151

UR - <http://search.ebscohost.com/login.aspx?direct=true&db=psyh&AN=2001-00593-006&site=ehost-live>

L3 - 10.1177/10538151000230040601

ER -

TY - JOUR

ID - 1786

T1 - Types of preschool friendships

A1 - Kerns,Kathryn A.

Y1 - 2000/09//

KW - PsycInfo

KW - Unsupervised Play Addition

KW - preschool friendship types

KW - 25-72 mo olds

KW - 1 yr followup

KW - Friendship

KW - Peer Relations

RP - NOT IN FILE

SP - 311

EP - 324

JF - Personal Relationships

VL - 7

IS - 3

CY - United Kingdom

PB - Blackwell Publishing

N2 - Utilized observational data collected from preschool friends and cluster analysis to derive friendship types. 50 friend pairs (aged 25-72 mo) were videotaped in a 1-hour free-play session, and observers rated several qualities of the interaction using the Dyadic Relationships-Q set (K. A. Park and E. Waters, 1986). Additionally, relationship stability was assessed in a follow up phone call 1 year after the experiment, and child-mother attachment was assessed using the Stevenson-Hinde's 75-item version of the Attachment Q-set (B.E. Vaughn et al, 1992). Cluster analysis suggested that both 3 and 5 cluster solutions produced meaningful groupings. For both solutions, the largest cluster included friend pairs that were harmonious, responsive, and interactive during play. A second type of friendship was characterized by harmony but relatively independent play. A disjointed friendship type, in which friends were low on measures of coordinated interaction and positive interaction, was the most stable over a 1 year period and tended to contain at least one insecurely attached child. Discussion focuses on how analysis of friendship type can be used to extend our understanding of the nature and socialization functions of friendship. (PsycINFO Database Record (c) 2012 APA, all rights reserved)

SN - 1475-6811

UR - <http://search.ebscohost.com/login.aspx?direct=true&db=psych&AN=2000-02582-006&site=ehost-live>

L3 - 10.1111/j.1475-6811.2000.tb00019.x

ER -

TY - JOUR

ID - 1787

T1 - Preventing dog bites in children: Randomised controlled trial of an educational intervention

A1 - Chapman,Simon

A1 - Cornwall,John

A1 - Righetti,Joanne

A1 - Sung,Lynne

Y1 - 2000/06//

KW - PsycInfo

KW - Unsupervised Play Addition

KW - educational program designed to instill precautionary behavior around dogs & prevent bites

KW - 7-8 yr olds

KW - Educational Programs

KW - Interspecies Interaction

KW - Prevention

KW - Dogs

RP - NOT IN FILE

SP - 1512

EP - 1513

JF - BMJ: British Medical Journal

VL - 320

IS - 7248

CY - United Kingdom

PB - BMJ Publishing Group

N2 - "Prevent-a-Bite" is an educational program for primary school children designed to instill precautionary behavior around dogs, assuming that this might reduce the incidence of bites. A randomized controlled trial of the efficacy of the intervention was conducted in 346 Australian children (aged 7-8 yrs). The intervention consisted of a 30 min lesson conducted by a dog handler. The handler and dog demonstrated various "dos and don'ts" of behavior around dogs and the Ss practiced patting the dog in the correct manner and precautionary and protective body posture to adopt when approached or knocked over by a dog. A resource kit for teachers, included activities to be undertaken before and after the demonstration, was also distributed. Seven to 10 days after participating in the program, Ss were let out to play unsupervised in the school grounds where a docile Labrador dog was tethered 5 meters away from its owner. The Ss were not told that the dog was there and were videotaped by a hidden camera for 10 min. Ss who had received the intervention displayed appreciably greater precautionary behavior than Ss who had not received the intervention. The educational program increased appreciably the precautionary behavior of young children around strange dogs in the short term. (PsycINFO Database Record (c) 2012 APA, all rights reserved)

SN - 0959-8138

UR - <http://search.ebscohost.com/login.aspx?direct=true&db=psych&AN=2001-03038-005&site=ehost-live>

L3 - 10.1136/bmj.320.7248.1512

ER -

TY - THES

ID - 1788

T1 - Interactive media: An analysis of children's computer and video game use

A1 - Scantlin,Ronda Mae

Y1 - 2000/06//

N1 - Accession Number: 2000-95012-270. First Author & Affiliation: Scantlin, Ronda Mae; U Texas At Austin, US. Other Journal Titles: Dissertation Abstracts International. Release Date: 20010228. Publication Type: Dissertation Abstract, (0400); . Media Covered: Electronic. Document Type: Dissertation. Dissertation Number: AAI9956920. Language: English. Major Descriptor: Age Differences; Childhood Play Behavior; Computer Games; Human Sex Differences; Racial and Ethnic Differences. Classification: Developmental Psychology (2800) . Population: Human (10); Male (30); Female (40); . Location: US. Age Group: Childhood (birth-12 yrs) (100) Infancy (2-23 mo) (140) Preschool Age (2-5 yrs) (160) School Age (6-12 yrs) (180) . Methodology: Empirical Study. Page Count: 1

KW - PsycInfo

KW - Unsupervised Play Addition

KW - age & sex & ethnicity

KW - categories of computer & video game use & context of play

KW - 1-12 yr olds

KW - Age Differences

KW - Childhood Play Behavior

KW - Computer Games

KW - Human Sex Differences

KW - Racial and Ethnic Differences

RP - NOT IN FILE

JF - Dissertation Abstracts International: Section B: The Sciences and Engineering

VL - 60

IS - 12-B

CY - US

PB - ProQuest Information & Learning

N2 - Children vary in the amount of time they spend playing computer and video games and in their preference for particular types of game content. The purpose of this study was to describe time-use patterns of 572 children 1-12 years of age. Game categories (educational, sports, sensorimotor, strategy, and other) and context of play (secondary activities, location of play, and who was with the child when playing) were analyzed by child age, sex, and ethnicity. Total minutes of interactive game play increased as a function of age, with boys' playing time higher and rising faster than girls' playing time. Younger children played more minutes of educational games than did older children, and girls more than boys. African American children reported little educational play at any age. Generally, sensorimotor and sports play increased as a function of age, with boys reporting significantly more minutes than girls at all ages. African American children spent a greater proportion of their time playing games whose titles were "unknown" than did White children. All groups of children spent about 60 percent of their game time focused only on interactive games, and about 30 percent of their game time communicating with others while playing. About 80 percent of the time spent playing games occurred in children's own homes. The youngest children, 1-5 years, spent a higher proportion of their time with adults present (20 percent), while the 9-12 year olds spent less time with adults (8 percent) and relatively more time alone (44 percent). Children of all ages, sexes, and ethnic groups spent 32-38 percent of their game time playing with other youths. (PsycINFO Database Record (c) 2012 APA, all rights reserved)

SN - 0419-4217

UR - <http://search.ebscohost.com/login.aspx?direct=true&db=psych&AN=2000-95012-270&site=ehost-live>

ER -

TY - JOUR

ID - 1789

T1 - Gedanken • ber Beginn und Abbruch einer Kinderanalyse

A1 - Stork,Jochen

Y1 - 1999/12//

KW - PsycInfo

KW - Unsupervised Play Addition

KW - spiritual aspects of journey of discovery

KW - psychoanalytic work

KW - Psychoanalysis

KW - Psychotherapeutic Processes

KW - Spirituality

RP - NOT IN FILE

SP - 378

EP - 410

JF - Kinderanalyse

VL - 7

IS - 4

CY - Germany

PB - Verlag-Klett-Cotta Stuttgart

N2 - Comments on the spiritual aspects of the journey of discovery represented by psychoanalytic work, whether with a child or with an adult. The present author thinks of a journey in which the psychoanalyst plays the role of the mystagogue, simultaneously entering the unknown, enigmatic world of a human heart, even though it may lead the guide to cast a dangerous glance at the world of folly. This essay describes the analysis of a 6 1/2-yr old boy (he is in his 9th yr when the analysis is interrupted), who brings a wealth of fantasy material to the initial stages of the analysis. This material can be subsumed under the problematics of the castration complex. The forced termination, approximately 100 sessions into this analysis, was not adequate to elaborating the analysand's pathologies; to cope with these unconscious problems, an omnipotent introject is annually incorporated. (PsycINFO Database Record (c) 2012 APA, all rights reserved)

SN - 0942-6051

UR - <http://search.ebscohost.com/login.aspx?direct=true&db=psyh&AN=2001-06320-004&site=ehost-live>

ER -

TY - JOUR

ID - 1791

T1 - The social development of children with severe learning difficulties: A case study of an inclusive educational initiative between two primary schools in Oxfordshire, UK

A1 - Dew-Hughes,Denise

A1 - Blandford,Sonia

Y1 - 1999/08//

KW - PsycInfo

KW - Unsupervised Play Addition

KW - Student Attitudes

KW - student socialization

KW - severe learning difficulties

KW - Mainstreaming

KW - Special Education

KW - Interpersonal Interaction

KW - Teacher Student Interaction

KW - Play

KW - Caregivers

KW - Learning Disabilities

KW - Mainstreaming (Educational)

KW - SOCIALIZATION

KW - Childhood Play Behavior

RP - NOT IN FILE

SP - 1

EP - 11

JF - Down Syndrome: Research & Practice

VL - 6

IS - 1

CY - United Kingdom

PB - Down Syndrome Educational Trust

N2 - Compared the attitudes and socialization of children with severe learning difficulties in an inclusive mainstream and special school. Six severely learning disabled 3rd grade students attending either mainstream or special schools were observed during academic activity, personal interactions, teacher/student interactions and times of unsupervised work or play. Observations concerned Ss' dependence on adults, differences in language and behavior at the 2 schools, and whether learning-disabled Ss preferred the company of adult Ss during recreation time. Caregivers completed interviews. Results show that Ss in mainstream schools managed longer periods of time on task without adult intervention, worked more independently, and used between task time more effectively than did Ss in special schools. Ss in mainstream schools took personal responsibility for movement between classes and were exposed to more sophisticated vocabulary than were special school Ss. It is concluded that the social development of severe learning disabled children is better served in mainstream, integrated schools than in special schools. (PsycINFO Database Record (c) 2012 APA, all rights reserved)

SN - 1753-7606

AD - Dew-Hughes, Denise, Oxford Brooks U, School of Education , Wheatley, England, OX33 1HX

UR - <http://search.ebscohost.com/login.aspx?direct=true&db=psych&AN=2001-11477-001&site=ehost-live>

L3 - 10.3104/case-studies.92

ER -

TY - JOUR

ID - 1792

T1 - Sex differences in behavior: The debate continues

A1 - Power, Thomas G.

Y1 - 1999/08//

KW - PsycInfo

KW - Unsupervised Play Addition

KW - Sex Differences

KW - human behavioral development

KW - peer experiences

KW - gender segregation

KW - sex-typed behavior patterns

KW - CHILDREN

KW - adult roles

KW - Childhood Development

KW - Human Development

KW - Human Sex Differences

KW - Sex Roles

KW - Peer Relations

RP - NOT IN FILE

SP - 333

EP - 335

JF - PsycCRITIQUES

VL - 44

IS - 4

CY - US

PB - American Psychological Association

N2 - Originally published in Contemporary Psychology: APA Review of Books, 1999, Vol 44(4), 333-335. Reviews the book "The Two Sexes: Growing Up Apart, Coming Together" by E. E. Maccoby (see record 1998-07927-000). Maccoby provides a well-articulated presentation of her most recent view of the origins and implications of sex differences in human behavioral development. She argues that sex differences in behavior are a consequence of experiences with peers--especially experiences in gender-segregated groups. Maccoby additionally argues that the tendency to choose same-sex playmates provides experiences that shape the development of sex-typed behavior patterns. Maccoby's analysis is likely to stimulate further research and debate on the origins and implications of sex differences in human development. It is also consistent with numerous contextual theories of sex differences in behavior that argue that one should not view sex differences

in behavior behavior in individual terms, but instead in the context of specific relationships and social contexts (e.g., Deaux & Major, 1987). Finally, in a more systematic way Maccoby begins to bridge the gap between the literatures on sex differences in children's behavior and gender differences in adult roles. Criticisms presented by this reviewer include the fact that Maccoby devotes so little space to the indirect effects of nonparent adults who have a significant impact on children's play activities--those in the media and those who create and market children's toys. An additional criticism is that although the animal and cross-cultural data are provocative, they do not support the role of gender-segregated peer groups as strongly as a reading of the present volume would indicate. (PsycINFO Database Record (c) 2012 APA, all rights reserved)

SN - 1554-0138

AD - Power, Thomas G., Department of Psychology, University of Houston 101 Heyne, Houston, TX, US, 77204-5341, tpower@uh.edu

UR - <http://search.ebscohost.com/login.aspx?direct=true&db=psyh&AN=2004-17593-034&site=ehost-live;tpower@uh.edu>

L3 - 10.1037/002051

ER -

TY - JOUR

ID - 1793

T1 - Credenze delle madri slovene su metodi educativi, apprendimento e gioco infantili

A1 - Gril, Alenka

A1 - Puklek, Melita

Y1 - 1999/06//

KW - PsycInfo

KW - Unsupervised Play Addition

KW - beliefs about childrearing & children's learning & independent play & personality traits

KW - mothers of 12-30 mo olds

KW - Childhood Play Behavior

KW - Childrearing Attitudes

KW - Learning

KW - Mothers

KW - Personality Traits

KW - Cognitive Development

KW - Parental Attitudes

RP - NOT IN FILE

SP - 53

EP - 60

JF - Et... Evolutiva

VL - 63

CY - Italy

PB - Giunti Gruppo Editoriale SPA

N2 - Studied the beliefs of mothers in Slovenia about child development, child rearing, and independent play with toys. 40 mothers of boys or girls, aged 12-30 mo, were administered an open questionnaire on child rearing and children's learning, independent play, and personality traits. 23 Ss had a university degree, and 17 were secondary school graduates. 56% of Ss believed that children start learning immediately after birth. 40% of Ss maintained that play was not distinct from other childhood activities. Two-thirds of Ss referred to stereotypical sex differences in personality types. 40% of Ss believed that both parents gave emotional support to their child. Ss used mainly verbal educational and child-rearing strategies with their child. (PsycINFO Database Record (c) 2012 APA, all rights reserved)

SN - 0392-0658

UR - <http://search.ebscohost.com/login.aspx?direct=true&db=psyh&AN=1999-11421-004&site=ehost-live>

ER -

TY - THES

ID - 1794

T1 - Painful medical procedures in children with cancer: The impact of reframing previous experiences in distress

A1 - Chen, Edith

Y1 - 1999/03//

N1 - Accession Number: 1999-95006-172. First Author & Affiliation: Chen, Edith; U California, Los Angeles, US. Other Journal Titles: Dissertation Abstracts International. Release Date: 19991201. Publication Type: Dissertation Abstract, (0400); . Media Covered: Electronic. Document Type: Dissertation. Dissertation Number: AAM9906093. Language: English. Major Descriptor: Child Psychology; Distress; Leukemias; Medical Diagnosis; Pain Perception. Classification: Health & Mental Health Treatment & Prevention (3300) Cognitive Processes (2340) . Population: Human (10); . Age Group: Childhood (birth-12 yrs) (100) Preschool Age (2-5 yrs) (160) School Age (6-12 yrs) (180) Adolescence (13-17 yrs) (200) Adulthood (18 yrs & older) (300) Young Adulthood (18-29 yrs) (320) . Methodology: Empirical Study. Page Count: 1

KW - PsycInfo

KW - Unsupervised Play Addition

KW - reframing previous experiences in distress

KW - future procedural distress for lumbar punctures

KW - 3-18 yr olds diagnosed with leukemia

KW - Child Psychology

KW - Distress

KW - Leukemias

KW - Medical Diagnosis

KW - Pain Perception

RP - NOT IN FILE

JF - Dissertation Abstracts International: Section B: The Sciences and Engineering

VL - 59

IS - 9-B

CY - US

PB - ProQuest Information & Learning

N2 - Previous intervention research studying children's procedural distress has focused on teaching coping skills to help the child deal with upcoming procedures. However, research into conditioned responses to repeated aversive events suggests that cognitive factors such as memory and evaluation of one's reactions to an event play a central role in determining the magnitude of a conditioned response such as fear. Additionally, research into children's eyewitness testimony suggests that children's memories of events are shaped by discussions with adults afterward. The present study tested a novel intervention aimed at positively reframing children's memories of previous medical procedures in order to reduce future procedural distress. Fifty children diagnosed with leukemia (25 treatment and 25 attention control, ages 3-18) were observed for three consecutive lumbar punctures (LPs; baseline, post-intervention, and follow-up) and were interviewed to assess their memories for these LPs. At post-treatment children in the treatment group showed reductions in self-report and physiological indices of anticipatory distress, while children in the control group showed no such reductions. At follow-up children in the treatment group reported and were rated by the technician to have less anxiety and pain during the LP and displayed reductions in other physiological indices of distress. Children in the attention control group showed no such reductions. The memory interview results revealed that after intervention, children in the treatment group had less exaggeration in negative memory compared to the attention control group, and that exaggerations in negative memory were associated with greater distress during LPs. These results suggest that children's negative memories influence LP-related distress and that targeting them can be an effective way of reducing both anticipatory and procedural distress. (PsycINFO Database Record (c) 2012 APA, all rights reserved)

SN - 0419-4217

UR - <http://search.ebscohost.com/login.aspx?direct=true&db=psyh&AN=1999-95006-172&site=ehost-live>

ER -

TY - CHAP

ID - 1795

T1 - Cognitive functioning in depressed children and adolescents: A developmental perspective

A1 - Gotlib, Ian H.

A1 - Sommerfeld, Beth Kaplan

Y1 - 1999///

N1 - Accession Number: 2000-07252-006. First Author & Affiliation: Gotlib, Ian H.; Stanford U, Dept of Psychology, Stanford, CA, US. Release Date: 20000401. Publication Type: Book, (0200); Edited Book, (0280); . Media Covered: Print. Document Type: Chapter. ISBN: 0-7657-0188-X, Paperback, 076570188X. Language: English. Major Descriptor: Cognitive Processes; Major Depression; Theories. Minor Descriptor: Adolescent Development; Childhood Development; Epidemiology. Classification: Affective Disorders (3211) . Population: Human (10); . Age Group: Childhood (birth-12 yrs) (100) Adolescence (13-17 yrs) (200) Adulthood (18 yrs & older) (300) . Intended Audience: Psychology: Professional & Research (PS) . Methodology: Literature Review. Page Count: 42

KW - PsycInfo

KW - Unsupervised Play Addition

KW - developmental perspective on epidemiology & nature & cognitive theories of depression in children & adolescents

KW - Cognitive Processes

KW - Major Depression

KW - Theories

KW - Adolescent Development

KW - Childhood Development

KW - epidemiology

RP - NOT IN FILE

SP - 195

EP - 236

T2 - Depressive disorders in children and adolescents: Epidemiology, risk factors, and treatment

A2 - Essau,Cecilia Ahmoi

A2 - Petermann,Franz

CY - Lanham, MD US

PB - Jason Aronson

N2 - (from the chapter) In this chapter, the authors address the following 2 questions: Are the cognitive factors and processes that have been found to be associated with depression in adulthood also present in children who are depressed? If they are, what role do they play in childhood depression? The authors begin their examination of these questions by discussing the nature of depression in children. In this context, they describe epidemiologic data demonstrating that depression does indeed exist in childhood. They continue with a description of the major cognitive theories of depression. This description provides a framework for presenting the results of investigations examining the tenets of cognitive theories, both in adults and in children and adolescents. In presenting these data, the authors also address the appropriateness of applying cognitive theories to children. Throughout the literature review, they relate the findings obtained with children to normal developmental processes. (PsycINFO Database Record (c) 2012 APA, all rights reserved) (chapter)

SN - 0-7657-0188-X

UR - <http://search.ebscohost.com/login.aspx?direct=true&db=psych&AN=2000-07252-006&site=ehost-live>

ER -

TY - THES

ID - 1796

T1 - The effects of sibling-implemented training on social behaviors of autistic children

A1 - Sullivan,Cristin Lea

Y1 - 1999/01//

N1 - Accession Number: 1999-95024-362. First Author & Affiliation: Sullivan, Cristin Lea; Western Michigan U., US. Other Journal Titles: Dissertation Abstracts International. Release Date: 20000607. Publication Type: Dissertation Abstract, (0400); . Media Covered: Electronic. Document Type: Dissertation. Dissertation Number: AAI9935414. Language: English. Major Descriptor: Autism; Siblings; Social Behavior. Classification: Health & Mental Health Treatment & Prevention (3300) . Population: Human (10); Male (30); . Age Group: Adulthood (18 yrs & older) (300) . Methodology: Empirical Study. Page Count: 1

KW - PsycInfo

KW - Unsupervised Play Addition

KW - sibling-implemented Pivotal Response Training

KW - social behaviors

KW - male autistic children



KW - Autism

KW - Siblings

KW - Social Behavior

RP - NOT IN FILE

JF - Dissertation Abstracts International: Section B: The Sciences and Engineering

VL - 60

IS - 6-B

CY - US

PB - ProQuest Information & Learning

N2 - The present study investigated the effectiveness of sibling-implemented Pivotal Response Training (PRT) on the social behaviors of five autistic children. Using a multiple-baseline design across sibling pairs, participants were trained to use PRT while playing with their brother with autism. Measures of play skills and social behavior were assessed during baseline, training, sibling-independent play, and two month follow-up sessions. Also, parents were asked to rate randomly selected video-tape segments from baseline and sibling-independent play sessions. The results indicated that siblings were able to learn effectively and implement PRT strategies following training. All of the autistic children demonstrated an increase in maintaining interactions and a decrease in non-engagement following training. Parent ratings demonstrated the social validity of positive behavior changes. (PsycINFO Database Record (c) 2012 APA, all rights reserved)

SN - 0419-4217

UR - <http://search.ebscohost.com/login.aspx?direct=true&db=psych&AN=1999-95024-362&site=ehost-live>

ER -

TY - JOUR

ID - 1797

T1 - Knocking the Girls Off the Basketball Court: Unnatural Selection through Taste and Unexamined Assumptions of Fairness on an Unsupervised Playground

A1 - McGrath, Daniel J.

A1 - Kuriloff, Peter J.

Y1 - 1999///

KW - PsycInfo

KW - Unsupervised Play Addition

KW - Athletics

KW - sixth grade girls

KW - school community

KW - fairness

KW - unstructured play

KW - sex discrimination

KW - basketball

KW - unsupervised play

KW - gender relations

KW - Playgrounds

KW - sixth grade boys

KW - Elementary School Students

KW - Human Females

KW - Justice

RP - NOT IN FILE

SP - 41

EP - 65

JF - The School Community Journal

VL - 9

IS - 2

CY - US

PB - Academic Development Institute

N2 - This paper offers a look inside one school community. It relates the story of a group of athletic sixth grade girls who controlled a central niche on the playground of a progressive elementary school for most of a school year, only to be displaced by a few highly competitive sixth grade boys. Data are from observations of

unstructured play included in the school's curriculum. The boys were able to dominate play sites because their taste for large, highly structured, and hierarchical games was implicitly favored by the school's rules for access to sites and activities. The study has implications for understanding gender relations among children, as well as gender and access to resources. (PsycINFO Database Record (c) 2012 APA, all rights reserved) (journal abstract)

SN - 1059-308X

UR - <http://search.ebscohost.com/login.aspx?direct=true&db=psyh&AN=2003-07882-003&site=ehost-live>

ER -

TY - JOUR

ID - 1798

T1 - Goal-directed behavior in children with Down syndrome: The role of joint play situations

A1 - Landry,Susan H.

A1 - Miller-Loncar,Cynthia L.

A1 - Swank,Paul R.

Y1 - 1998/10//

KW - PsycInfo

KW - Unsupervised Play Addition

KW - goal-directed behaviors during joint play interaction with their mothers

KW - 4-7 yr olds with Down syndrome

KW - Childhood Play Behavior

KW - Down's Syndrome

KW - Goals

KW - Interpersonal Interaction

KW - Mother Child Relations

RP - NOT IN FILE

SP - 375

EP - 392

JF - Early Education and Development

VL - 9

IS - 4

CY - US

PB - Lawrence Erlbaum

N2 - Children's goal-directed behaviors were examined in independent play sessions before and after a joint-play interaction with their mothers for a group of children with Down syndrome (n=?22) and a control group of mental and language age matched typically developing children (n=?24). While both groups showed comparable amounts of time spent in independent goal-directed play during the pre-session and similar play responses with their mothers during the joint-play session, only the control children significantly increased their goal-directed behavior from the pre- to the post-session. Maternal behaviors that provided information about how to use the toy predicted increases from the pre- to post-sessions in independent goal-directed play but only for the control children. These findings suggest that children with Down syndrome may have more difficulty transferring the goal-directed play behaviors they can use with support from their mothers to an independent play situation. Findings are discussed in relation to early education program design for children with Down syndrome. (PsycINFO Database Record (c) 2012 APA, all rights reserved)

SN - 1040-9289

UR - <http://search.ebscohost.com/login.aspx?direct=true&db=psyh&AN=1998-12630-003&site=ehost-live>

L3 - 10.1207/s15566935eed0904\_4

ER -

TY - JOUR

ID - 1800

T1 - Variability in the play of preschoolers with cognitive delays across different toy sets

A1 - Malone,D.Michael

A1 - Langone,John

Y1 - 1998/06//

KW - PsycInfo

KW - Unsupervised Play Addition  
 KW - doll vs vehicle vs mixed toy set  
 KW - play behavior  
 KW - 2-5 yr old preschool males vs females with cognitive delays  
 KW - Childhood Play Behavior  
 KW - Cognitive Ability  
 KW - Delayed Development  
 KW - Human Sex Differences  
 KW - Toys  
 RP - NOT IN FILE  
 SP - 127  
 EP - 142  
 JF - International Journal of Disability, Development and Education  
 VL - 45  
 IS - 2  
 CY - United Kingdom  
 PB - Taylor & Francis  
 N2 - The variability in play associated with different toy sets was examined in 30 preschool children (aged 2-5 yrs) with cognitive delays. 12 dependent variables representing categorical and sequential play were coded from videotaped home-based independent play sessions using a continuous 15-sec interval coding procedure. The authors chose a mixed toy set, a doll toy set, and a vehicle toy set to address the issue of general social stereotypes of children's play. Sex by toy set interaction effects emerged for exploration, pretend, ordered multischeme sequences, and global play sophistication. Main effects across toy sets were noted for nonplay, functional play, construction, overall proportion of play, time spent sequencing activities, and length of play sequences. The pattern of play observed within each toy set was strikingly similar across each of the 3 toy sets. Implications for practice are discussed. (PsycINFO Database Record (c) 2012 APA, all rights reserved)  
 SN - 1465-346X  
 UR - <http://search.ebscohost.com/login.aspx?direct=true&db=psych&AN=1998-04373-001&site=ehost-live>  
 L3 - 10.1080/1034912980450202  
 ER -

TY - THES  
 ID - 1801  
 T1 - The relation between disruptive behavior problems, self-worth and perceived competence in middle childhood  
 A1 - Usher, Barbara Ann  
 Y1 - 1998/05//  
 N1 - Accession Number: 1998-95010-272. First Author & Affiliation: Usher, Barbara Ann; U Maryland Coll Park, US. Other Journal Titles: Dissertation Abstracts International. Release Date: 19990801. Publication Type: Dissertation Abstract, (0400); . Media Covered: Electronic. Document Type: Dissertation. Dissertation Number: AAM9816535. Language: English. Major Descriptor: Behavior Problems; Competence; Conduct Disorder; Self Concept; Self Perception. Minor Descriptor: Mother Child Relations. Classification: Developmental Psychology (2800) Personality Psychology (3100) . Population: Human (10); . Age Group: Childhood (birth-12 yrs) (100) School Age (6-12 yrs) (180) . Methodology: Empirical Study; Longitudinal Study. Page Count: 1  
 KW - PsycInfo  
 KW - Unsupervised Play Addition  
 KW - global self-worth & perceived competence & behavior problems & mother's social support  
 KW - 9-11 yr olds at risk for conduct disorder  
 KW - 5 yr study  
 KW - Behavior Problems  
 KW - Competence  
 KW - Conduct Disorder  
 KW - Self Concept  
 KW - Self Perception  
 KW - Mother Child Relations  
 RP - NOT IN FILE

JF - Dissertation Abstracts International: Section B: The Sciences and Engineering

VL - 58

IS - 11-B

CY - US

PB - ProQuest Information & Learning

N2 - Self-concept plays a critical role in motivating behavior and mediating affect in the lives of children, adolescents, and adults. The present correlational study examined global self-worth and perceived competence among children who exhibit disruptive behavior problems. Disruptive behavior problems comprise the most common referrals for child and adolescent mental health services. They are known to be stable over time, difficult to treat, and predictive of poor outcome in adolescence and adulthood. This study examined (a) the relation of behavior problems with self-worth and perceived competence, (b) discrepancy between children's and teacher's perceptions of competence, (c) the role of maternal and social support in relation to self-worth and behavior problems, (d) how self-conscious emotions are related to self-worth and behavior problems, and (e) children's attributions for their self-judgments. Subjects were 73 children, ages 9 to 11, who had been participating in a longitudinal study of children at risk for conduct disorder since they were 4- to 5-years-old. Mothers' and teachers' ratings of children's behavior problems were available for each of three data collection points. The main findings suggested that mothers' and teachers' behavior problem ratings were not associated with children's sense of global self-worth, but they were associated with children's negative evaluations in specific domains. The significance of associations was not consistent across domains. Comparison of children's and teachers' perceptions of children's competence revealed that children who underestimated their competence in one or more of the specific domains reported lower global self-worth. However, children who overestimated their own behavioral conduct were rated higher on externalizing problems by their mothers and teachers. As expected, children who perceived higher maternal and social support reported higher self-worth and competence. The importance of specific sources of support varied among the domains. Perceptions of maternal acceptance and support were more strongly associated with self-worth for children with externalizing and attention problems. (PsycINFO Database Record (c) 2012 APA, all rights reserved)

SN - 0419-4217

UR - <http://search.ebscohost.com/login.aspx?direct=true&db=psyh&AN=1998-95010-272&site=ehost-live>

ER -

TY - JOUR

ID - 1802

T1 - Il segreto e il sequestro. Dall'oggetto nascosto all'oggetto prigioniero

A1 - D'Andrea, Anna

Y1 - 1998/05//

KW - PsycInfo

KW - Unsupervised Play Addition

KW - psychoanalytic perspective of role of secrecy to object in narcissistic personalities

KW - children & adults

KW - Narcissistic Personality Disorder

KW - Object Relations

KW - Psychoanalytic Theory

KW - Secrecy

RP - NOT IN FILE

SP - 293

EP - 305

JF - Psichiatria dell'infanzia e dell'adolescenza

VL - 65

IS - 3

CY - Italy

PB - Edizioni Borla

N2 - Presents a psychoanalytic discussion of the role of secrecy in relation to the object in narcissistic personality structures. Theoretical references and clinical reports of children and adults are presented to show how secrecy can have the significance of conservation of the object (which is concealed so as to be protected and kept apart) in some situations and the significance of omnipotent control of the object (which is placed under constraint so as to be made harmless) in other situations. The possibility is discussed that secrecy may be

transformed into sequestration and may play a pathological role in some behaviors typical of narcissistic personalities. (English abstract) (PsycINFO Database Record (c) 2012 APA, all rights reserved)

SN - 0393-361X

UR - <http://search.ebscohost.com/login.aspx?direct=true&db=psyh&AN=1999-00270-003&site=ehost-live>

ER -

TY - JOUR

ID - 1803

T1 - The effect of reinforcer preference on functional analysis outcomes

A1 - Lalli,Joseph S.

A1 - Kates,Kelly

Y1 - 1998///

KW - PsycInfo

KW - Unsupervised Play Addition

KW - functional analysis & concurrent-schedule assessments

KW - identification of reinforcer preference during problem behavior situations

KW - 2.5-3.5 yr old males with developmental delays

KW - Behavior Problems

KW - Behavioral Assessment

KW - Delayed Development

KW - Reinforcement

RP - NOT IN FILE

SP - 79

EP - 90

JF - Journal of Applied Behavior Analysis

JA - J Appl.Behav Anal.

VL - 31

IS - 1

CY - US

PB - Journal of Applied Behavior Analysis

N2 - Combined functional analyses and concurrent-schedule assessments to identify reinforcer preference during situations in which problem behavior may have been multiply controlled. Participants were 3 children (aged 2.5-3.5 yrs) with developmental delays who engaged in problem behavior during toy play with another child and 1 adult present, suggesting that problem behavior may have been maintained by adult attention or access to tangible reinforcement. Thus, conditions were designed to test attention and access-to-toys hypotheses. Initial functional analyses suggested multiple control. Subsequent concurrent-schedule assessments identified preference between the reinforcers, and treatments were based on these findings. Findings are discussed regarding the assessment of potentially multiply controlled problem behavior. (PsycINFO Database Record (c) 2012 APA, all rights reserved)

SN - 1938-3703

UR - <http://search.ebscohost.com/login.aspx?direct=true&db=psyh&AN=1998-01324-005&site=ehost-live>

L3 - 10.1901/jaba.1998.31-79

ER -

TY - THES

ID - 1804

T1 - Preschool children's use of race and ethnicity in everyday interaction

A1 - Van Ausdale,Debra

Y1 - 1998/01//

N1 - Accession Number: 1998-95001-053. First Author & Affiliation: Van Ausdale, Debra; U Florida, US.

Other Journal Titles: Dissertation Abstracts International. Release Date: 19980101. Publication Type:

Dissertation Abstract, (0400); . Media Covered: Electronic. Document Type: Dissertation. Dissertation Number:

AAM9800197. Language: English. Major Descriptor: Childhood Play Behavior; Racial and Ethnic Attitudes;

Social Cognition. Minor Descriptor: Early Childhood Development. Classification: Developmental Psychology

(2800) . Population: Human (10); . Age Group: Childhood (birth-12 yrs) (100) . Page Count: 1

KW - PsycInfo

KW - Unsupervised Play Addition  
KW - Preschool children's use of race and ethnicity in everyday interaction  
KW - Childhood Play Behavior  
KW - Racial and Ethnic Attitudes  
KW - Social Cognition  
KW - Early Childhood Development  
RP - NOT IN FILE  
JF - Dissertation Abstracts International Section A: Humanities and Social Sciences  
VL - 58  
IS - 7-A  
CY - US  
PB - ProQuest Information & Learning  
N2 - This study is a participant observation exploration of the how very young children construct, understand and use race and ethnicity during unsupervised play. It challenges conventional theoretical orientations that proceed from the assumption that children cannot understand racial and ethnic concepts because of the children's stage of cognitive development. The purpose of this study is to analyze and describe how, from a very early age, race and ethnicity become central to very young children's social knowledge of the world. (PsycINFO Database Record (c) 2012 APA, all rights reserved)  
SN - 0419-4209  
UR - <http://search.ebscohost.com/login.aspx?direct=true&db=psyh&AN=1998-95001-053&site=ehost-live>  
ER -

TY - CHAP  
ID - 1805  
T1 - Guilt in the classroom  
A1 - Williams, Christopher  
Y1 - 1998//  
N1 - Accession Number: 1997-36487-011. First Author & Affiliation: Williams, Christopher; Cornell U, Medical Coll, Dept of Public Health, Inst for Prevention Research, New York, NY, US. Release Date: 19980401. Publication Type: Book, (0200); Edited Book, (0280); . Media Covered: Print. Document Type: Chapter. ISBN: 0-12-148610-9, Hardcover, 0121486109. Language: English. Major Descriptor: Academic Achievement; Classroom Behavior; Classroom Discipline; Guilt. Classification: Classroom Dynamics & Student Adjustment & Attitudes (3560) . Population: Human (10); . Intended Audience: Psychology: Professional & Research (PS) . Page Count: 11  
KW - PsycInfo  
KW - Unsupervised Play Addition  
KW - role of guilt in behavior within & outside classroom & educational performance & differences in guilt across academic track & guilt induction as discipline technique  
KW - Academic Achievement  
KW - Classroom Behavior  
KW - Classroom Discipline  
KW - Guilt  
RP - NOT IN FILE  
SP - 233  
EP - 243  
T2 - Guilt and children  
A2 - Bybee, Jane  
CY - San Diego, CA US  
PB - Academic Press  
N2 - (from the chapter) Begin by summarizing ways in which guilt may be adaptive in the classroom environment. The author then explores the role guilt may play in the regulation and control of classroom conduct, in fostering academic achievement, and in determining participations in risky, unsupervised out-of-school activities. The author then turns to differences observed in guilt as a function of academic track. The author closes by suggesting conditions under which teachers and parents may effectively use and induce guilt feelings among young people to raise scholastic and socioemotional competence. (PsycINFO Database Record (c) 2012 APA, all rights reserved) (chapter)

SN - 0-12-148610-9

UR - <http://search.ebscohost.com/login.aspx?direct=true&db=psych&AN=1997-36487-011&site=ehost-live>

L3 - 10.1016/B978-012148610-5/50012-6

ER -

TY - BOOK

ID - 1806

T1 - Inuit morality play: The emotional education of a three-year-old

A1 - Briggs, Jean L.

Y1 - 1998///

N1 - Accession Number: 1998-07639-000. First Author & Affiliation: Briggs, Jean L.. Release Date: 19980701. Publication Type: Book, (0200); Authored Book, (0240); . Media Covered: Print. ISBN: 0-300-07237-6, Hardcover, 0300072376. Language: English. Major Descriptor: Early Childhood Development; Education; Interpersonal Interaction; Recreation; Socialization. Minor Descriptor: Childrearing Practices; Drama; Emotional Development; Inuit. Classification: Psychosocial & Personality Development (2840) . Population: Human (10); Female (40); . Location: Canada. Age Group: Childhood (birth-12 yrs) (100) Preschool Age (2-5 yrs) (160) Adulthood (18 yrs & older) (300) . Intended Audience: Psychology: Professional & Research (PS)

KW - PsycInfo

KW - Unsupervised Play Addition

KW - growing up & emotional education & socialization through dramatic play interactions

KW - 3 yr old Inuit girl

KW - Early Childhood Development

KW - Education

KW - Interpersonal Interaction

KW - Recreation

KW - SOCIALIZATION

KW - Childrearing Practices

KW - Drama

KW - Emotional Development

KW - Inuit

RP - NOT IN FILE

CY - New Haven, CT US

PB - Yale University Press

N2 - (from the jacket) Inuit adults often playfully present small children with difficult, even dangerous, choices and then dramatize the consequences of the child's answers. They are enacting in larger-than-life form the plots that drive Inuit social life-testing, acting out problems, entertaining themselves, and, most of all, bringing up their children. (jacket)

J. L. Briggs takes readers through 6 mo of dramatic interactions in the life of Chubby Maata, a 3-yr-old girl growing up in a Baffin Island hunting camp. The book examines the issues that engaged the child-belonging, possession, love-and shows the process of growing. Briggs questions the nature of "sharedness" in culture and assumptions about how culture is transmitted. She suggests that both cultural meanings and strong personal commitment to one's world can be (and perhaps must be) acquired not by straightforwardly learning attitudes, rules, and habits in a dependent mode but by experiencing oneself as an agent engaged in productive conflict in emotionally problematic situations. Briggs finds that dramatic play is an essential force in Inuit social life. It creates and supports values; engenders and manages attachments and conflicts; and teaches and maintains an alert, experimental, constantly testing approach to social relationships. (PsycINFO Database Record (c) 2012 APA, all rights reserved) (jacket)

SN - 0-300-07237-6

UR - <http://search.ebscohost.com/login.aspx?direct=true&db=psych&AN=1998-07639-000&site=ehost-live>

ER -

TY - JOUR

ID - 1807

T1 - Adult and infant perception of two English phones

A1 - Pegg, Judith E.

A1 - Werker, Janet F.  
 Y1 - 1997/12//  
 KW - PsycInfo  
 KW - Unsupervised Play Addition  
 KW - English phonetic discrimination  
 KW - 6-8 vs 10-12 mo olds vs adults  
 KW - Age Differences  
 KW - Auditory Discrimination  
 KW - Developmental Age Groups  
 KW - Phonemes  
 KW - Speech Perception  
 RP - NOT IN FILE  
 SP - 3742  
 EP - 3753  
 JF - Journal of the Acoustical Society of America  
 VL - 102  
 IS - 6  
 CY - US  
 PB - Acoustical Society of American  
 N2 - Previous research has shown that young infants easily discriminate both native and non-native consonant contrasts, but by 10-12 mo of age infants perform like adults and easily discriminate only native consonant contrasts. The present study was designed to determine what kind of experience is required to maintain discrimination of native consonants. To address this question, English listeners of 3 ages (6-8 mo, 10-12 mo, and adults) were presented with a phonetic difference. This distinction occurs in English but is not phonemic. If passive exposure is sufficient to maintain discrimination, all age groups should discriminate the 2 sounds. However, if phonological status plays a role, then older infants and adults should fail. In Exp 1, English adults judged the 2 sounds to be equally good instances of the same phonemic category. In an AX procedure in Exp 2, English adults discriminated the 2 sounds better than chance but worse than native phonemic levels. In the Conditioned Head Turn procedure in Exp 3, adults and 6- to 8-mo-old infants discriminated the sounds but 10- to 12-mo-old infants did not. Taken together, these results are most consistent with the hypothesis that phonological status plays a role in maintaining discrimination of phonetic information. (PsycINFO Database Record (c) 2012 APA, all rights reserved)  
 SN - 0001-4966  
 UR - <http://search.ebscohost.com/login.aspx?direct=true&db=psyh&AN=1997-42754-015&site=ehost-live>  
 L3 - 10.1121/1.420137  
 ER -  
  
 TY - JOUR  
 ID - 1808  
 T1 - 'Skal vi lage pulver?' Om språklige gjentakelser i lek-et bidrag til hypoteser om språkutvikling hos små barn  
 A1 - Aukrust, Vibeke G.  
 Y1 - 1997/09//  
 KW - PsycInfo  
 KW - Unsupervised Play Addition  
 KW - repetition during play as verbally mediating activity  
 KW - male 2 yr olds  
 KW - 4 mo study  
 KW - implications for hypotheses on language acquisition  
 KW - Childhood Play Behavior  
 KW - Imitation (Learning)  
 KW - Language Development  
 RP - NOT IN FILE  
 SP - 192  
 EP - 211  
 JF - Nordisk Psykologi



VL - 49

IS - 3

CY - Denmark

PB - Hans Reitzels Forlag

N2 - Investigated if children's extensive use of different forms of repetition have the function of verbally mediating activity. Human Ss: Two normal male preschool children (aged 2 yrs). Ss were videofilmed during dyadic play of a game named by the Ss as "making powder" once or twice a wk for 4 mo. The significance of repetition during play was examined in relationship to self-repetition, immediate repetition of the peer and delayed repetition of non-present adults to determine if repetition played a factor in directing the activity. (English abstract) (PsycINFO Database Record (c) 2012 APA, all rights reserved)

SN - 0029-1463

UR - <http://search.ebscohost.com/login.aspx?direct=true&db=psych&AN=1997-43376-001&site=ehost-live>

ER -

TY - THES

ID - 1809

T1 - Family correlates of sibling relationships in young adulthood

A1 - Chebra, Janice Marie

Y1 - 1997/04//

N1 - Accession Number: 1997-95007-194. First Author & Affiliation: Chebra, Janice Marie; The Ohio State U, US. Other Journal Titles: Dissertation Abstracts International. Release Date: 19970101. Publication Type: Dissertation Abstract, (0400); . Media Covered: Electronic. Document Type: Dissertation. Dissertation Number: AAM9710543. Language: English. Major Descriptor: Attachment Behavior; Family Relations; Rites (Nonreligious); Sibling Relations. Minor Descriptor: Age Differences; Human Sex Differences; Systems Theory. Classification: Developmental Psychology (2800) . Population: Human (10); Male (30); Female (40); . Age Group: Childhood (birth-12 yrs) (100) Adolescence (13-17 yrs) (200) Adulthood (18 yrs & older) (300) Young Adulthood (18-29 yrs) (320) . Methodology: Empirical Study. Page Count: 1

KW - PsycInfo

KW - Unsupervised Play Addition

KW - Family correlates of sibling relationships in young adulthood

KW - Attachment Behavior

KW - Family Relations

KW - Rites (Nonreligious)

KW - Sibling Relations

KW - Age Differences

KW - Human Sex Differences

KW - Systems Theory

RP - NOT IN FILE

JF - Dissertation Abstracts International Section A: Humanities and Social Sciences

VL - 57

IS - 10-A

CY - US

PB - ProQuest Information & Learning

N2 - Social scientists increasingly recognize the importance that siblings play throughout the life course and the intrinsic and extrinsic benefits that this special kinship bond may provide. Although evidence suggests that the context of the sibling relationship changes over time, most of the research has ignored the significance of the sibling bond throughout early and middle adulthood. The present study explores the relationship of family satisfaction, family strength, and family ritual to the quality of sibling relationships for college-age young adults. This investigation offers an important test of family systems theory by evaluating the interdependence of subsystems within the larger family system. The sample was drawn from college students enrolled in introductory family courses at two Midwestern universities. Participants were undergraduates between the ages of 18-23; unmarried or never married; had no children; had at least one living sibling; and were not a twin. The final sample consisted of 283 females and 25 males (N=308). Participants responded to a series of self-report measures included in the Sibling Survey to assess demographic and personal information about the subject, their family and siblings. Significant findings suggest the following conclusions regarding the significance of sibling and family relationships during young adulthood. First, young adults positively evaluated closeness to the

sibling nearest in age. Based on retrospective reports, sibling relationships were closer in childhood and young adulthood than in adolescence. Secondly, there was a positive relationship among family strength, family satisfaction, family ritual and sibling warmth. Third, low levels of family strength and family satisfaction were related to higher sibling conflict and sibling rivalry. Fourth, high ritual routine was positively related to total sibling conflict; whereas high ritual meaning was negatively related to total sibling conflict. Fifth, high ritual routine was related to greater paternal sibling rivalry. Finally, sister-sister dyads reported higher levels of total sibling warmth, intimacy, emotional support, affection, knowledge, and admiration than sister-brother dyads. However, no statistically significant differences were found between gender dyad (sister-sister or sister-brother) and sibling conflict or sibling rivalry. (PsycINFO Database Record (c) 2012 APA, all rights reserved)

SN - 0419-4209

UR - <http://search.ebscohost.com/login.aspx?direct=true&db=psych&AN=1997-95007-194&site=ehost-live>

ER -

TY - CHAP

ID - 1810

T1 - Metacommunication as a source of indeterminism in relationship development

A1 - Fogel, Alan

A1 - Branco, Angela Uchoa

Y1 - 1997///

N1 - Accession Number: 1997-97399-003. First Author & Affiliation: Fogel, Alan; U Utah, Salt Lake City, UT, US. Release Date: 19970901. Publication Type: Book, (0200); Edited Book, (0280); . Media Covered: Print.

Document Type: Chapter. ISBN: 0-8058-1805-7, Hardcover, 0805818057; 0-8058-1806-5, Paperback, 0805818065. Language: English. Major Descriptor: Communication; Determinism; Interpersonal Interaction;

Psychosocial Development. Minor Descriptor: Dialectics; Parent Child Relations; Peer Relations; Systems

Theory. Classification: Psychosocial & Personality Development (2840) Philosophy (2630) . Population:

Human (10); . Age Group: Childhood (birth-12 yrs) (100) Infancy (2-23 mo) (140) Preschool Age (2-5 yrs)

(160) . Intended Audience: Psychology: Professional & Research (PS) . Page Count: 28

KW - PsycInfo

KW - Unsupervised Play Addition

KW - dialectical & determinism & indeterminism dynamic systems perspectives on relationship development & metacommunication in parent-infant & early childhood peer interaction

KW - Communication

KW - Determinism

KW - Interpersonal Interaction

KW - Psychosocial Development

KW - Dialectics

KW - Parent Child Relations

KW - Peer Relations

KW - Systems Theory

RP - NOT IN FILE

SP - 65

EP - 92

T2 - Dynamics and indeterminism in developmental and social processes

A2 - Fogel, Alan

A2 - Lyra, Maria C.D.P.

A2 - Valsiner, Jaan

CY - Hillsdale, NJ England

PB - Lawrence Erlbaum Associates, Inc

N2 - (from the chapter) the premise of this chapter is that interpersonal relationships are developing systems of communication, systems that generate meaning in the form of emotion, commitment, and memories / relationships construct their own life histories and move through developmental phases, such as getting acquainted, establishing trust and intimacy, maintenance, decline, and rejuvenation or termination / take a dialectical perspective on relationship continuity and change, focusing on the everyday communication processes that constitute the direct contacts between participants / examine relationship development from the perspective of determinism and indeterminism / review the literature on dynamic systems theory to suggest how indeterminacy can arise in a developing system and, in particular, how it may arise in relationship development /

explore the relative roles of communication and metacommunication in relationship development (chapter) communication includes all forms of everyday coactions between participants, including sharing, cooperation, conflict, debate, social play, and conversation / in metacommunication, participants evaluate their own communication process / review the literature on adult relationships and present data from our own work on parent-infant and preschool peer play / hypothesize that metacommunication may be one source of indeterministic change in interpersonal relationships, primarily because it constrains the future course of a relationship by making explicit the connection of the future with the past and the present / indeterminism can arise with respect to the timing of metacommunication, its topic and scope, and its impact on action (PsycINFO Database Record (c) 2012 APA, all rights reserved) (chapter)

SN - 0-8058-1805-7

UR - <http://search.ebscohost.com/login.aspx?direct=true&db=psych&AN=1997-97399-003&site=ehost-live>

ER -

TY - CHAP

ID - 1811

T1 - Kinesiology and sensorimotor function

A1 - Rosen,Sandra

Y1 - 1997///

N1 - Accession Number: 1997-36844-005. First Author & Affiliation: Rosen, Sandra; San Francisco State U, Programs in Visual Impairment, San Francisco, CA, US. Release Date: 19980401. Publication Type: Book, (0200); Edited Book, (0280); . Media Covered: Print. Document Type: Chapter. Book Type: Textbook/Study Guide. ISBN: 0-89128-946-1, Hardcover, 0891289461. Language: English. Major Descriptor: Perceptual Motor Development; Perceptual Motor Processes; Vision Disorders. Classification: Vision & Hearing & Sensory Disorders (3299) . Population: Human (10); . Age Group: Childhood (birth-12 yrs) (100) Adulthood (18 yrs & older) (300) . Intended Audience: Psychology: Professional & Research (PS) . Page Count: 30

KW - PsycInfo

KW - Unsupervised Play Addition

KW - kinesiology & sensorimotor development & functioning

KW - children & adults who are visually impaired

KW - Perceptual Motor Development

KW - Perceptual Motor Processes

KW - Vision Disorders

RP - NOT IN FILE

SP - 170

EP - 199

T2 - Foundations of orientation and mobility (2nd ed.)

A2 - Blasch,Bruce B.

A2 - Wiener,William R.

A2 - Welsh,Richard L.

CY - New York, NY US

PB - American Foundation for the Blind

N2 - (from the chapter) This chapter explores sensorimotor development and functioning in children and adults who are visually impaired. This consideration includes the role of sensorimotor skills in independent mobility and the impact of visual impairment on their development. Kinesiology, the study of movement, provides the structure for categorizing, analyzing, understanding, and communicating about sensorimotor skills. (PsycINFO Database Record (c) 2012 APA, all rights reserved) (chapter)

SN - 0-89128-946-1

UR - <http://search.ebscohost.com/login.aspx?direct=true&db=psych&AN=1997-36844-005&site=ehost-live>

ER -

TY - CHAP

ID - 1812

T1 - The child in the adult: The contribution of child analysis to the psychoanalysis of adults

A1 - Anderson,Robin

Y1 - 1997///

N1 - Accession Number: 1997-97199-007. First Author & Affiliation: Anderson, Robin. Release Date: 19970701. Publication Type: Book, (0200); Edited Book, (0280); . Media Covered: Print. Document Type: Chapter. ISBN: 0-8236-1055-1, Hardcover, 0823610551. Language: English. Major Descriptor: Age Differences; Child Psychotherapy; Psychoanalysis. Classification: Psychoanalytic Therapy (3315) . Population: Human (10); . Age Group: Childhood (birth-12 yrs) (100) Adulthood (18 yrs & older) (300) . Intended Audience: Psychology: Professional & Research (PS) . Page Count: 12

KW - PscInfo

KW - Unsupervised Play Addition

KW - child vs adult psychoanalysis

KW - Age Differences

KW - Child Psychotherapy

KW - Psychoanalysis

RP - NOT IN FILE

SP - 414

EP - 425

T2 - The contemporary Kleinians of London

A2 - Schafer,Roy

CY - Madison, CT US

PB - International Universities Press, Inc

N2 - (from the book) provides an . . . overview of the contemporary approach to child analysis, and it [includes] sessions drawn from the analysis of a 4-yr-old boy / develop [a] comparison of child and adult analysis / shows how the child's play sessions are paralleled by the adult's largely verbal, though also gestural and attitudinal productions / argues that, because each adult brings an internal world to the consulting room, he or she will enact the internal child through the verbal and other means of communication used in the sessions / analysts familiar with child analysis are bound to see a more subtle and perhaps less raw version of the child's inner world in the adult's production / presents illustrative material from the analysis of a man (PscINFO Database Record (c) 2012 APA, all rights reserved) (book)

SN - 0-8236-1055-1

UR - <http://search.ebscohost.com/login.aspx?direct=true&db=psych&AN=1997-97199-007&site=ehost-live>

ER -

TY - JOUR

ID - 1813

T1 - An assessment protocol for selective mutism: Analogue assessment using parents as facilitators

A1 - Schill,Melissa T.

A1 - Kratochwill,Thomas R.

A1 - Gardner,William I.

Y1 - 1996///

KW - PscInfo

KW - Unsupervised Play Addition

KW - parent facilitated assessment protocol for identification of maintaining variables & formulation of treatment recommendations

KW - 8 yr old female with selective mutism

KW - Client Characteristics

KW - Elective Mutism

KW - Oral Communication

KW - Behavior Therapy

KW - Parental Attitudes

RP - NOT IN FILE

SP - 1

EP - 21

JF - Journal of School Psychology

VL - 34

IS - 1

CY - Netherlands

PB - Elsevier Science

N2 - Presents an assessment protocol for conducting a functional analysis of maintaining environmental variables for children with selective mutism. The S was an 8-yr-old girl in 1st grade who met Diagnostic and Statistical Manual of Mental Disorders-IV (DSM-IV) criteria for selective mutism. A modified version of the Functional Diagnostic Protocol was used during an initial interview with the S's parents to develop a hypothesis about environmental and personal variables that may be contributors to the disorder. The S's speech rates were measured across a continuum of high- and low-demand situations in which various behavior strategies were implemented to increase speech. Speech was best maintained in the presence of unfamiliar adults when it was required for play in a family game or when fading techniques were used. Based on this data, treatment recommendations deemed suitable by both the S and her parents were generated for use at school and home. (PsycINFO Database Record (c) 2012 APA, all rights reserved)

SN - 0022-4405

UR - <http://search.ebscohost.com/login.aspx?direct=true&db=psyh&AN=1996-00617-001&site=ehost-live>

L3 - 10.1016/0022-4405(95)00023-2

ER -

TY - JOUR

ID - 1814

T1 - You can be the baby brother but you aren't born yet: Preschool girls' negotiation for power and access in pretend play

A1 - Sheldon,Amy

Y1 - 1996///

KW - PsycInfo

KW - Unsupervised Play Addition

KW - facets of empowerment in conflict negotiation & social facilitation during role playing conversation

KW - 3-5 yr old females

KW - Childhood Play Behavior

KW - Conflict

KW - Conversation

KW - Negotiation

KW - Social Facilitation

KW - Empowerment

KW - Role Playing

RP - NOT IN FILE

SP - 57

EP - 80

JF - Research on Language and Social Interaction

VL - 29

IS - 1

CY - US

PB - Lawrence Erlbaum

N2 - Examined the discourse skills used by some White, middle-class advantaged preschool girls to manage their disagreements. The authors show how their management of opposition is a jointly constructed achievement. As such, it requires the coordination of high levels of sociolinguistic skill to arrive at cooperative as well as self-serving, competitive, or discordant ends. The episode discussed here is a sustained and discontinuous oppositional example of verbally engineered social ostracism, which is fairly common in preschoolers' interactions, especially during pretend play. Ss were 36 3-5 yr old girls videotaped in unsupervised play at their daycare center. The events examined are likened to a theatrical production, with roles played both on and off stage. The double-voiced nature of 3 girls' interactions can be described as simultaneously self-serving and socially savvy as one S tries to exclude another, who in turn tries to negotiate a role for herself in the play scenario. An analysis of their interactions highlights the linguistic effectiveness of the double-voiced method, through the use of a falsetto vocal tone, in exerting control and managing conflict while remaining civil and socially facilitative. (PsycINFO Database Record (c) 2012 APA, all rights reserved)

SN - 1532-7973

UR - <http://search.ebscohost.com/login.aspx?direct=true&db=psyh&AN=1999-05145-003&site=ehost-live>

L3 - 10.1207/s15327973rlsi2901\_4

ER -

TY - JOUR  
ID - 1815  
T1 - Gender differences in the object-oriented play of preschoolers with cognitive delays  
A1 - Malone,D.Michael  
A1 - Langone,John  
Y1 - 1995///  
KW - PsycInfo  
KW - Unsupervised Play Addition  
KW - Sex  
KW - object oriented play  
KW - preschoolers with cognitive delays  
KW - Childhood Play Behavior  
KW - Cognitive Development  
KW - Delayed Development  
KW - Human Sex Differences  
RP - NOT IN FILE  
SP - 302  
EP - 314  
JF - Journal of Early Intervention  
VL - 19  
IS - 4  
CY - US  
PB - Council for Exceptional Children  
N2 - Gender differences in the play of preschool children with cognitive delays were investigated. 12 dependent variables representing categorical and sequential play were coded from observations of 18 boys and 12 girls playing during an independent-play session at home. Boys and girls were observed to play differentially with 3 toy sets (mixed, doll, and vehicle) with which they were presented. Overall, boys engaged in more functional play than girls and were more sophisticated when playing with the vehicle toy set. Girls, however, engaged in more constructive play than boys and demonstrated a tendency for greater sophistication with respect to the doll toys. (PsycINFO Database Record (c) 2012 APA, all rights reserved)  
SN - 1053-8151  
UR - <http://search.ebscohost.com/login.aspx?direct=true&db=psyh&AN=1996-03965-005&site=ehost-live>  
L3 - 10.1177/105381519501900405  
ER -

TY - JOUR  
ID - 1816  
T1 - Methylphenidate in children with mental retardation and ADHD: Effects on independent play and academic functioning  
A1 - Handen,Benjamin L.  
A1 - McAuliffe,Sarah  
A1 - Janosky,Janine  
A1 - Feldman,Heidi  
Y1 - 1995/06//  
KW - PsycInfo  
KW - Unsupervised Play Addition  
KW - Methylphenidate  
KW - independent play & academic on task behavior  
KW - mentally retarded 6.1-12.5 yr olds with attention deficit hyperactivity disorder  
KW - Attention Deficit Disorder  
KW - Childhood Play Behavior  
KW - Mental Retardation  
KW - Time on Task  
KW - Drug Therapy  
KW - Hyperkinesis

RP - NOT IN FILE

SP - 91

EP - 103

JF - Journal of Developmental and Physical Disabilities

VL - 7

IS - 2

CY - Germany

PB - Springer

N2 - 22 children (aged 6.1-12.5 yrs) with mental retardation and attention deficit hyperactivity disorder (ADHD) participated in a double-blind, placebo-controlled study of methylphenidate involving .3 and .6 mg/kg medication doses and a placebo. Clinic-based observations of independent play and a restricted academic task were conducted to assess drug response. An interval recording system was used to code behaviors such as length of play, physical movement, intensity of play, and toy pickups during a 10-min independent play observation. On-task behavior, fidgetiness, out-of-seat behavior, and touching toys were coded during a 10-min restricted academic task. Results indicate significant changes across a number of dependent measures with the use of methylphenidate. Both play and restricted academic tasks may serve as appropriate clinic-based means of assessing stimulant medication efficacy in children with mental retardation and ADHD. (PsycINFO Database Record (c) 2012 APA, all rights reserved)

SN - 1573-3580

UR - <http://search.ebscohost.com/login.aspx?direct=true&db=psych&AN=1995-44827-001&site=ehost-live>

L3 - 10.1007/BF02684955

ER -

TY - JOUR

ID - 1817

T1 - Crisis intervention with survivors of natural disaster: Lessons from Hurricane Andrew

A1 - Shelby,Janine S.

A1 - Tredinnick,Michael G.

Y1 - 1995/05//

KW - PsycInfo

KW - Unsupervised Play Addition

KW - crisis intervention issues & therapeutic responses

KW - mental health workers assisting survivors of Hurricane Andrew

KW - Crisis Intervention Services

KW - Natural Disasters

KW - Counseling

RP - NOT IN FILE

SP - 491

EP - 497

JF - Journal of Counseling & Development

VL - 73

IS - 5

CY - US

PB - American Counseling Assn

N2 - Presents anecdotal evidence from mental health work with Hurricane Andrew survivors in south Florida and discusses implications for general disaster counseling. The mental health workers served a predominantly lower SES group with diverse ethnic identities, all of whom had been left homeless by the 1992 hurricane. Interventions were based on the belief that enhancing clients' perceived power would restore or improve predisaster functioning. Issues presented by adults included helplessness and a sense of loss, both of which were dealt with through individual counseling, stress reduction techniques, and helping the adults increase their sense of mastery. Children experienced regression and anxiety and were treated through play therapy, drawing, and positive reframing. The effects of multicultural issues are noted. (PsycINFO Database Record (c) 2012 APA, all rights reserved)

SN - 1556-6676

UR - <http://search.ebscohost.com/login.aspx?direct=true&db=psych&AN=1996-92364-001&site=ehost-live>

L3 - 10.1002/j.1556-6676.1995.tb01784.x

ER -

TY - JOUR

ID - 1818

T1 - Contextual variation of correspondences among measures of play and developmental level of preschool children

A1 - Malone,D.Michael

A1 - Stoneman,Zolinda

A1 - Langone,John

Y1 - 1994///

KW - PsycInfo

KW - Unsupervised Play Addition

KW - independent home vs classroom free play & cognitive & communicative developmental age

KW - categorical & sequential play patterns

KW - 24-70 mo olds with developmental delays

KW - Childhood Play Behavior

KW - Childhood Play Development

KW - Delayed Development

KW - Home Environment

KW - School Environment

KW - Cognitive Development

KW - Communication Skills

KW - Developmental Age Groups

RP - NOT IN FILE

SP - 199

EP - 215

JF - Journal of Early Intervention

VL - 18

IS - 2

CY - US

PB - Council for Exceptional Children

N2 - Convergent assessment in a multicontext design was used to examine the development of 22 preschool children (aged 24-70 mo) with cognitive delays (range 10-53 mo). The children were observed during both an independent-play condition at home and a group free-play condition at school. Both categorical and sequential play activity were coded. Cognitive and communicative performance levels were established through the administration of the Battelle Developmental Inventory. Data were examined for patterns of association within and across contexts. Differential patterns of association among play variables emerged across contexts. Assessed developmental age was more predictive of play behaviors demonstrated in the independent-play condition than in the classroom free-play condition. Findings highlight the need to consider contextual variation associated with play-based assessment and program development. (PsycINFO Database Record (c) 2012 APA, all rights reserved)

SN - 1053-8151

UR - <http://search.ebscohost.com/login.aspx?direct=true&db=psyh&AN=1995-21823-001&site=ehost-live>

L3 - 10.1177/105381519401800207

ER -

TY - JOUR

ID - 1819

T1 - L'uso regolativo del linguaggio nell'interazione precoce fra pari

A1 - Lavelli,Manuela

Y1 - 1994/02//

KW - PsycInfo

KW - Unsupervised Play Addition

KW - utterances during play activity with peers with vs without adults

KW - 18-30 mo olds

KW - Italy



KW - Oral Communication

KW - Peer Relations

KW - Childhood Play Behavior

RP - NOT IN FILE

SP - 41

EP - 52

JF - Et. ... Evolutiva

VL - 47

CY - Italy

PB - Giunti Gruppo Editoriale SPA

N2 - Studied the nature and functions of the utterances produced by 18-30-mo-old toddlers in interactions both with peers and with adults; and assessed the development of functions with age, socially regulative functions of utterances, differences in interaction with peers and with adults, and differences in verbal-communication behavior between males and females. Human Ss: Six normal male and female Italian infants and preschool children (aged 1-2 yrs). At the ages of 18, 21, 24, 27, and 30 mo, Ss were videotaped in 10-min sessions of play activity with 3 peers both with and without the presence of an adult. Their utterances were analyzed for the relevant information. (English abstract) (PsycINFO Database Record (c) 2012 APA, all rights reserved)

SN - 0392-0658

UR - <http://search.ebscohost.com/login.aspx?direct=true&db=psych&AN=1994-87336-001&site=ehost-live>

ER -

TY - JOUR

ID - 1820

T1 - Analysis of state organizational patterns among students with profound disabilities

A1 - Guess,Doug

A1 - Siegel-Causey,Ellin

A1 - Roberts,Sally

A1 - Guy,Barbara

Y1 - 1993///

KW - PsycInfo

KW - Unsupervised Play Addition

KW - interaction between behavior state & endogenous & exogenous variables

KW - multiply handicapped 4-16 yr olds

KW - implications for intervention & education

KW - Consciousness States

KW - Environment

KW - Multiple Disabilities

KW - Physiology

KW - Profound Mental Retardation

KW - Special Education Students

RP - NOT IN FILE

SP - 93

EP - 108

JF - Journal of the Association for Persons with Severe Handicaps

VL - 18

IS - 2

CY - US

PB - Assn for Persons with Severe Handicaps

N2 - Reviews recent research on state behavior among children and youth with profound disabilities and presents a model depicting interactions of state with endogenous and exogenous variables. Applications of the model are illustrated through case studies of 4 students (aged 4-16 yrs) with profound disabilities, including mental retardation, lack of independent mobility, and congenital anomalies. Results indicate that persons with profound disabilities demonstrate significant individual differences in their state organization. Nevertheless, they show extremely low occurrences of those responses subsumed under the awake active-alert state that allow for the behavioral diversity, fluency, and richness important to adaptive performance in complex environments. (PsycINFO Database Record (c) 2012 APA, all rights reserved)

SN - 0274-9483

UR - <http://search.ebscohost.com/login.aspx?direct=true&db=psyh&AN=1994-05612-001&site=ehost-live>

ER -

TY - JOUR

ID - 1821

T1 - Comunicazione verbale e non verbale nell'interazione del bambino con i coetanei e con gli adulti

A1 - Lavelli,Manuela

Y1 - 1993/04//

KW - PsycInfo

KW - Unsupervised Play Addition

KW - age

KW - verbal vs nonverbal communication with peers vs adults

KW - 18-30 mo olds

KW - Italy

KW - Age Differences

KW - Nonverbal Communication

KW - Social Interaction

KW - Verbal Communication

RP - NOT IN FILE

SP - 281

EP - 297

JF - Giornale Italiano di Psicologia

VL - 20

IS - 2

CY - Italy

PB - Societ... editrice il Mulino

N2 - Studied and compared the use of verbal and nonverbal means of communication by 18 young children in communicating with their peers and with adults, and assessed changes in patterns of communication from the ages of 18 mo to 30 mo. Ss, who were equally divided into age groups of 18 mo, 21 mo, 24 mo, 27 mo, and 30 mo, were observed and videotaped in play groups of 3 each with and without the presence of an adult. Ss' communication behaviors were scored for instances of verbal and nonverbal communication. (English abstract) (PsycINFO Database Record (c) 2012 APA, all rights reserved)

SN - 0390-5349

UR - <http://search.ebscohost.com/login.aspx?direct=true&db=psyh&AN=1994-85096-001&site=ehost-live>

ER -

TY - CHAP

ID - 1822

T1 - Simple phobia in adults

A1 - Stanley,Melinda A.

A1 - Beidel,Deborah C.

Y1 - 1993///

N1 - Accession Number: 1993-98371-009. First Author & Affiliation: Stanley, Melinda A.; U Texas, Medical School, Dept of Psychiatry & Behavioral Sciences, Assistant Professor, Houston, TX, US. Translated Book Series Title: General psychology series, Vol. 171. Release Date: 19940201. Publication Type: Book, (0200); Edited Book, (0280); . Media Covered: Print. Document Type: Chapter. Book Type: Handbook/Manual. ISBN: 0-205-14583-3, Hardcover, 0205145833. Language: English. Major Descriptor: Behavior Therapy; Behavioral Assessment; Phobias. Classification: Neuroses & Anxiety Disorders (3215) Behavior Therapy & Behavior Modification (3312) . Population: Human (10); . Intended Audience: Psychology: Professional & Research (PS) . Page Count: 15

KW - PsycInfo

KW - Unsupervised Play Addition

KW - presents information on assessment & treatment of simple phobias in adulthood

KW - Behavior Therapy

KW - Behavioral Assessment

KW - Phobias  
RP - NOT IN FILE  
SP - 137  
EP - 151  
T2 - Handbook of behavior therapy with children and adults: A developmental and longitudinal perspective  
A2 - Ammerman, Robert T.  
A2 - Hersen, Michel  
CY - Needham Heights, MA US  
PB - Allyn & Bacon  
T3 - General psychology series, Vol. 171  
N2 - (from the chapter) although simple phobias may be common in the general population, they are rarely seen in clinical settings / it is likely that many of those in the community who meet diagnostic criteria have successfully arranged their lives so that their phobic symptoms do not interfere with daily functioning / if these fears are present in adulthood, there appears to be little likelihood of their spontaneous remission / those patients who do present to clinics often have additional clinical symptomatology which may play an important role in treatment response / [presents information on] the literature on the assessment and treatment of simple phobias (chapter)  
behavioral assessment strategies / behavior therapy approaches / pharmacological treatments (PsycINFO Database Record (c) 2012 APA, all rights reserved) (chapter)  
SN - 0-205-14583-3  
UR - <http://search.ebscohost.com/login.aspx?direct=true&db=psyh&AN=1993-98371-009&site=ehost-live>  
ER -

TY - JOUR  
ID - 1823  
T1 - Neuropsychological deficits in sexual offenders: Implications for treatment  
A1 - Lang, Reuben A.  
Y1 - 1993///  
KW - PsycInfo  
KW - Unsupervised Play Addition  
KW - brain pathology  
KW - sex offenders  
KW - treatment implications  
KW - Neuropathology  
KW - Sex Offenses  
RP - NOT IN FILE  
SP - 181  
EP - 200  
JF - Sexual & Marital Therapy  
VL - 8  
IS - 2  
CY - United Kingdom  
PB - Taylor & Francis  
N2 - Provides a brief overview of the growing body of evidence that a proportion of adult sexual offenders present with some localized form of brain pathology, often left temporal lobe, that may, in part, explain the presence of gender dysphoria and the attraction to deviant behavior patterns in sexually anomalous men who prefer child surrogate partners or unsuspecting women. The techniques employed rely on social skill training, psychodramatic role plays (using a doll or mannequin), stress reduction and anger management, empathy training, guided visualization, neurolinguistic programming, cognitive restructuring, sketches of covert fantasies or deviant actions for group discussion, and victim-perpetrator role reversal, selectively applied within the context of a relapse prevention model for adult sexual offenders. (PsycINFO Database Record (c) 2012 APA, all rights reserved)  
SN - 0267-4653  
UR - <http://search.ebscohost.com/login.aspx?direct=true&db=psyh&AN=1994-02046-001&site=ehost-live>  
L3 - 10.1080/02674659308408193  
ER -

TY - CHAP

ID - 1824

T1 - Play: Its role in child analysis, its fate in adult analysis

A1 - Mahon,Eugene J.

Y1 - 1993///

N1 - Accession Number: 1993-98417-010. First Author & Affiliation: Mahon, Eugene J.; Columbia U, Coll of Physicians & Surgeons, Assistant Clinical Professor of Psychiatry, New York, NY, US. Release Date: 19940301. Publication Type: Book, (0200); Edited Book, (0280); . Media Covered: Print. Document Type: Chapter. ISBN: 0-300-05438-6, Hardcover, 0300054386. Language: English. Major Descriptor: Childhood Play Behavior; Psychoanalysis; Psychotherapeutic Processes. Classification: Psychoanalytic Therapy (3315) . Population: Human (10); . Age Group: Childhood (birth-12 yrs) (100) Preschool Age (2-5 yrs) (160) Adulthood (18 yrs & older) (300) . Intended Audience: Psychology: Professional & Research (PS) . Methodology: Empirical Study. Page Count: 11

KW - PsycInfo

KW - Unsupervised Play Addition

KW - role of play in child & adult psychoanalysis

KW - 5 & 23 yr old males

KW - Childhood Play Behavior

KW - Psychoanalysis

KW - Psychotherapeutic Processes

RP - NOT IN FILE

SP - 172

EP - 182

T2 - The many meanings of play: A psychoanalytic perspective

A2 - Solnit,Albert J.

A2 - Cohen,Donald J.

A2 - Neubauer,Peter B.

CY - New Haven, CT US

PB - Yale University Press

N2 - Discusses the role of play in child and adult psychoanalysis and presents examples of its use in the analyses of a five-yr-old boy and a twenty-three-yr-old man. (PsycINFO Database Record (c) 2012 APA, all rights reserved)

SN - 0-300-05438-6

UR - <http://search.ebscohost.com/login.aspx?direct=true&db=psyh&AN=1993-98417-010&site=ehost-live>

ER -

TY - JOUR

ID - 1825

T1 - Consultation with adult children of aging parents

A1 - Shulman,Bernard H.

A1 - Sperry,Len

Y1 - 1992/12//

KW - PsycInfo

KW - Unsupervised Play Addition

KW - Adlerian perspective on consultation issues

KW - adult children of aging parents

KW - Adlerian Psychotherapy

KW - Adult Offspring

KW - Aging

KW - Individual Psychotherapy

KW - Professional Consultation

RP - NOT IN FILE

SP - 427

EP - 431

JF - Individual Psychology: Journal of Adlerian Theory, Research & Practice

VL - 48

IS - 4

CY - US

PB - North American Society of Adlerian Psychology

N2 - Reviews the concerns adult children (AC) present concerning their aging parents. Adequate nutrition, decent housing, economic stability, and access to appropriate medical care are essential concerns for both the elderly and their caregivers. Of considerable concern to caregivers are many psychosocial issues. Aging parent-adult child relationships tend to follow 1 of 4 patterns depending on the status the aging parents retain and the role the AC play. These 4 patterns are status-equality, status-quo, status-conflict, and status-reversal. A consultant can be most useful in building better relationships between parents and AC by helping them see beyond the roles they have previously played so that they can view each other as fellow human beings. (PsycINFO Database Record (c) 2012 APA, all rights reserved)

SN - 0277-7010

UR - <http://search.ebscohost.com/login.aspx?direct=true&db=psyh&AN=1993-38418-001&site=ehost-live>

ER -

TY - JOUR

ID - 1826

T1 - Preterm infants' affective responses in independent versus toy-centered play with their mothers

A1 - Garner,Pamela W.

A1 - Landry,Susan H.

Y1 - 1992///

KW - PsycInfo

KW - Unsupervised Play Addition

KW - independent vs toy centered play with mother

KW - affective responses

KW - preterm medically high vs low risk 6 mo olds

KW - Childhood Play Behavior

KW - Emotional Responses

KW - Premature Birth

KW - Toys

KW - At Risk Populations

KW - Mother Child Relations

RP - NOT IN FILE

SP - 219

EP - 230

JF - Infant Mental Health Journal

VL - 13

IS - 3

CY - US

PB - John Wiley &amp; Sons

N2 - The affective behavior of 33 medically high-risk (HR) infants, 40 low-risk (LR) infants, and a control group of 44 full-term (FT) infants was compared at age 6 mo during a 5-min independent and a 5-min toy-centered play session with their mothers. It was predicted that HR infants would show less positive affect and more negative affect in toy-centered (vs independent) play and joint attention (vs face-to-face) interactions than would the LR or FT infants. HR infants displayed fewer smiles across the independent and mother toy-centered play condition and across face-to-face and joint attention interactions than LR or FT infants. The mother's presence facilitated the expression of positive affect for all 3 infant groups. (French, Spanish & Japanese abstracts) (PsycINFO Database Record (c) 2012 APA, all rights reserved)

SN - 1097-0355

UR - <http://search.ebscohost.com/login.aspx?direct=true&db=psyh&AN=1993-14169-001&site=ehost-live>

L3 - 10.1002/1097-0355(199223)13:3&lt;219::AID-IMHJ2280130308&gt;3.0.CO;2-9

ER -

TY - JOUR

ID - 1828

T1 - Situational variation in problem behavior at home and school in attention deficit disorder with hyperactivity: A factor analytic study

A1 - Altepeter, Thomas S.

A1 - Breen, Michael J.

Y1 - 1992/05//

KW - PsycInfo

KW - Unsupervised Play Addition

KW - factor analysis of Home vs School Situations Questionnaires

KW - assessment of variability in problem behaviors

KW - 5-12 yr olds with attention deficit disorder with hyperactivity

KW - Attention Deficit Disorder

KW - Factor Structure

KW - Hyperkinesis

KW - Questionnaires

KW - Social Environments

KW - Behavior Problems

KW - Home Environment

KW - School Environment

RP - NOT IN FILE

SP - 741

EP - 748

JF - Journal of Child Psychology and Psychiatry

VL - 33

IS - 4

CY - United Kingdom

PB - Blackwell Publishing

N2 - Assesses situational variation in problem behaviors of children with attention deficit disorder with hyperactivity (ADD/H). Data were collected on 163 clinic-referred children (aged 5-12 yrs). Principal-component factors were computed for the Home/School Situations Questionnaires (HSQ/SSQ). For the HSQ, 4 factors emerged (nonfamily transactions, custodial transactions, task performance transactions, and isolate play). For the SSQ, 3 factors emerged (unsupervised settings, task performance, and special events). Factors were similar to those previously derived with nonreferred children. To assess discriminative power, factors were compared (t-tests) to previous data. All 7 factors significantly discriminated ADD/H from nonreferred children. These data suggest that the factors add to the utility of the HSQ/SSQ in assessing ADD/H. (PsycINFO Database Record (c) 2012 APA, all rights reserved)

SN - 1469-7610

UR - <http://search.ebscohost.com/login.aspx?direct=true&db=psych&AN=1992-33605-001&site=ehost-live>

L3 - 10.1111/j.1469-7610.1992.tb00909.x

ER -

TY - JOUR

ID - 1829

T1 - Maternal behavior and infant attention

A1 - Lawson, Katharine R.

A1 - Parrinello, Roseanne

A1 - Ruff, Holly A.

Y1 - 1992/04//

KW - PsycInfo

KW - Unsupervised Play Addition

KW - Maternal Behavior

KW - infant's attention to objects during joint play

KW - full term vs preterm 12 mo olds & their mothers

KW - Attention

KW - Childhood Play Behavior

KW - Mother Child Relations

KW - Mothers

KW - Premature Birth

RP - NOT IN FILE

SP - 209

EP - 229

JF - Infant Behavior & Development

JA - Infant behav

VL - 15

IS - 2

CY - Netherlands

PB - Elsevier Science

N2 - Investigated associations between maternal behavior and 12-mo-old infants' attention to objects during a period of joint play. 90 full-term and 59 preterm Ss were presented with a set of toys for independent play; their mothers then joined them for play with the same toys. Focused exploration of the objects was higher and active inattention was lower during the interaction than during independent play. Children were divided into high-, average-, and low-attending groups on the basis of their independent focused attention and active inattention; interaction with the mother resulted in the greatest increases in focused attention and greatest decreases in active inattention for the low attenders. Analyses showed that focused attention and active inattention during the interaction were related to both the child's spontaneous tendency to be attentive and specific maternal behaviors and characteristics. (PsycINFO Database Record (c) 2012 APA, all rights reserved)

SN - 0163-6383

UR - <http://search.ebscohost.com/login.aspx?direct=true&db=psych&AN=1993-01092-001&site=ehost-live>

L3 - 10.1016/0163-6383(92)80024-O

ER -

TY - JOUR

ID - 1830

T1 - Social pretend play among friends and familiar preschoolers

A1 - Werebe, Maria G.

A1 - BaudonniŠre, Pierre Marie

Y1 - 1991/12//

KW - PsycInfo

KW - Unsupervised Play Addition

KW - partner familiarity

KW - organization & duration & content of spontaneous social pretend play

KW - 3-5 yr olds in triads of 2 friends & 1 familiar partner

KW - France

KW - Childhood Play Behavior

KW - Familiarity

KW - Peer Relations

KW - Pretend Play

KW - Friendship

RP - NOT IN FILE

SP - 411

EP - 428

JF - International Journal of Behavioral Development

VL - 14

IS - 4

CY - US

PB - Lawrence Erlbaum

N2 - Assessed, among 60 boys and 60 girls (aged 3-5 yrs), the role of partner familiarity in the organization, duration, and content of spontaneous social pretend play in a triadic situation. Each triad of classmates was made up of a dyad of friends, plus familiar partner. Findings show that friends preferred each other as a partner in fantasy play, and play between friends was longer and richer than play with the 3rd partner. Girls spent nearly twice as much time in fantasy as boys. The use of 2 sets of identical objects for 3 children without adult presence, constituted a powerful paradigm to evidence the effect of the degree of familiarity in children's

interaction in general, and in pretend play in particular. (PsycINFO Database Record (c) 2012 APA, all rights reserved)

SN - 1464-0651

UR - <http://search.ebscohost.com/login.aspx?direct=true&db=psyh&AN=1992-19531-001&site=ehost-live>

ER -

TY - JOUR

ID - 1831

T1 - Effects of maternal presence on sibling behavior

A1 - Musun-Miller,Linda

Y1 - 1991/04//

KW - PsycInfo

KW - Unsupervised Play Addition

KW - maternal presence vs absence

KW - interactions & other social behavior

KW - 4-9 yr old sibling pairs

KW - Interpersonal Interaction

KW - Mother Child Relations

KW - Sibling Relations

KW - Social Behavior

RP - NOT IN FILE

SP - 145

EP - 157

JF - Journal of Applied Developmental Psychology

VL - 12

IS - 2

CY - Netherlands

PB - Elsevier Science

N2 - Analyzed videotapes of 20 sibling pairs (aged 4-9 yrs) interacting in a laboratory playroom for 15 min with their mother present and 15 min with her absent. There were significant differences in the behavior emitted by siblings depending on maternal presence/absence. When mothers were present, siblings engaged in more attending, helping, and interacting. When mothers were absent, siblings engaged in more disapproval, independent play, ignoring, negative physical contact, talking, and teasing. Maternal presence also interacted significantly with sex of each individual child and the sex of the sibling pair. Maternal presence may play a facilitative role in promoting prosocial behavior, whereas her absence is associated with a wider variety of behavior and a greater incidence of antagonistic behavior by siblings. (PsycINFO Database Record (c) 2012 APA, all rights reserved)

SN - 0193-3973

UR - <http://search.ebscohost.com/login.aspx?direct=true&db=psyh&AN=1992-01098-001&site=ehost-live>

L3 - 10.1016/0193-3973(91)90008-R

ER -

TY - JOUR

ID - 1832

T1 - Urban children's access to their neighborhood: Changes over three generations

A1 - Gaster,Sanford

Y1 - 1991/01//

KW - PsycInfo

KW - Unsupervised Play Addition

KW - Demographic Characteristics

KW - children's access & use of urban public neighborhood space

KW - Adults

KW - 1915-76

KW - Childhood Play Behavior

KW - Neighborhoods

KW - Urban Environments



RP - NOT IN FILE

SP - 70

EP - 85

JF - Environment and Behavior

VL - 23

IS - 1

CY - US

PB - Sage Publications

N2 - Investigated a New York City neighborhood to determine changes in its children's use of local public space between 1915 and 1976. 29 adults were interviewed, and such archival sources as US census reports were consulted for demographic changes. Substantial changes were detected in (1) the age at which children were first allowed outdoors without supervision, (2) the number and quality of settings visited, (3) the number and nature of environmental obstacles, (4) the number and nature of parent-imposed restrictions, and (5) the number of professionally supervised activities undertaken. Both the degree to which the neighborhood environment supported children's play and children's access to their neighborhood have declined substantially since the 1940s. (PsycINFO Database Record (c) 2012 APA, all rights reserved)

SN - 0013-9165

UR - <http://search.ebscohost.com/login.aspx?direct=true&db=psych&AN=1991-14071-001&site=ehost-live>

L3 - 10.1177/0013916591231004

ER -

TY - JOUR

ID - 1834

T1 - Lies and truth: A study of the development of the concept

A1 - Strichartz, Abigail F.

A1 - Burton, Roger V.

Y1 - 1990/02//

KW - PsycInfo

KW - Unsupervised Play Addition

KW - development of "lie" & "truth" concepts

KW - nursery school vs preschool students vs 1st vs 5th graders vs adults

KW - test of prototype usage

KW - Age Differences

KW - Childhood Development

KW - Concept Formation

KW - Truth

KW - Deception

KW - Honesty

RP - NOT IN FILE

SP - 211

EP - 220

JF - Child Development

JA - Child Dev.

VL - 61

IS - 1

CY - United Kingdom

PB - Blackwell Publishing

N2 - Examined the developmental questions of when children begin to use the terms lie and truth, how they understand them, and when their understanding approaches that of adults. 150 Ss in 5 groups (nursery schoolers, preschoolers, 1st graders, 5th graders, and adults) were presented a series of 8 short puppet plays that varied the presence or absence of the 3 prototype elements: factuality of a statement, the speaker's belief in the factuality or falsity of the statement, and the speaker's intent to deceive the listener. Responses of 5th graders were transitional between those of the younger children and adults. These results replicate L. Coleman and P. Kay's (1981) finding that adults decide whether a statement is a lie by comparing it against a prototype defined by the elements of factuality, intent, and belief, and that they consider the speaker's belief system the most important element of the prototype. (PsycINFO Database Record (c) 2012 APA, all rights reserved)

SN - 1467-8624

UR - <http://search.ebscohost.com/login.aspx?direct=true&db=psyh&AN=1990-14417-001&site=ehost-live>

L3 - 10.2307/1131060

ER -

TY - CHAP

ID - 1835

T1 - Developmental and psycholinguistic considerations

A1 - Wishart, J.G.

A1 - Tomporowski, P.D.

A1 - Lewis, A.

A1 - Carpenter, B.

A1 - Binzley, A.

A1 - Polomsky, P.

A1 - Shah, P.

A1 - Walker, D.M.

A1 - Lloyd, L.L.

Y1 - 1990//

N1 - Accession Number: 1990-97940-005. Partial author list. First Author & Affiliation: Wishart, J. G.; U Edinburgh, Dept of Psychology, Edinburgh Ctr for Research in Child Development, Edinburgh, Scotland. Release Date: 19900101. Publication Type: Book, (0200); Edited Book, (0280); . Media Covered: Print. Document Type: Chapter. ISBN: 0-415-01363-1, Hardcover, 0415013631. Language: English. Major Descriptor: Human Development; Psycholinguistics; Intellectual Development Disorder. Minor Descriptor: Attention; Communication; Imagery; Learning. Classification: Mental Retardation (3256) . Population: Human (10); . Intended Audience: Psychology: Professional & Research (PS) . Page Count: 58

KW - PsycInfo

KW - Unsupervised Play Addition

KW - Mental Retardation

KW - Human Development

KW - Psycholinguistics

KW - Intellectual Development Disorder

KW - Attention

KW - Communication

KW - Imagery

KW - Learning

RP - NOT IN FILE

SP - 249

EP - 306

T2 - Key issues in mental retardation research: Proceedings of the Eighth Congress of the International Association for the Scientific Study of Mental Deficiency (IASSMD)

A2 - Fraser, William Irvine

CY - Florence, KY US

PB - Taylor & Frances/Routledge

N2 - (from the book) [book section covering several chapters] (book)

"Learning to Learn: The Difficulties Faced by Infants and Young Children with Down's Syndrome" / J. G. Wishart / reports results from a series of interlinked, longitudinal studies of early learning in Down's Syndrome (DS) / the first set of studies monitored the development of a concept of objects / the second used operant learning techniques to examine learning styles used at different stages in development (book)

"Sustained Attention in Mentally Retarded Persons" / P. D. Tomporowski / evaluate research studies which have been conducted to assess the sustained attention of retarded individuals / describe findings obtained in our laboratory and discuss the results of these studies in context of current theories of sustained attention (book)

"Discourse, in an Integrated School Setting, Between Six- and Seven-Year-Old Non-Handicapped Children and Peers with Severe Learning Difficulties" / A. Lewis and B. Carpenter / examine some aspects of discourse between non-handicapped (NH) six and seven year olds, and peers with severe learning difficulties (SLD) / hypothesized that talk by the NH children to SLD partners would contain characteristics found in talk by NH children to younger NH children (book)

"Self-Talk in the Institutionalized Retarded: Naturalistic Observations" / V. A. Binzley, P. Polomsky and P. Shah / given the developmental delay and poor self-regulation noted in some retarded adults, the present study was undertaken to determine if the developmental phenomenon of self-talk occurs in this population (book)

"Theory into Practice: Inculcating Initial Notions about Language Intervention with Children with Mental Handicap" / D. M. Walker / describes the establishment and initial results of a programme to enhance the communication skills of mentally handicapped non-verbal children using a combination of group and individual treatments (book)

"The Role of Iconicity in Augmentative and Alternative Communication-Symbol Learning" / L. L. Lloyd and D. R. Fuller / discussed the role iconicity plays in the initial acquisition of augmentative and alternative communication (AAC) symbols (PsycINFO Database Record (c) 2012 APA, all rights reserved) (book)

SN - 0-415-01363-1  
 UR - <http://search.ebscohost.com/login.aspx?direct=true&db=psych&AN=1990-97940-005&site=ehost-live>  
 ER -

TY - JOUR

ID - 1836

T1 - Vyvoj hry u d?t ;p?edsskoln m v?ku

A1 - Antelmanov ,D sa

A1 - Severov ,Marie

Y1 - 1990///

KW - PsycInfo

KW - Unsupervised Play Addition

KW - age

KW - developmental trends in cognitive vs practical vs symbolic free play activities

KW - 2-6 yr olds

KW - 9 mo study

KW - Childhood Play Behavior

KW - Early Childhood Development

KW - Longitudinal Studies

RP - NOT IN FILE

SP - 99

EP - 106

JF - Psychologie a Patopsychologie Die?a?a

VL - 25

IS - 2

CY - Slovak Republic

PB - Vyskumny Ustav Detskij Psychologie a Patopsychologie

N2 - Studied the free play of 32 children divided at the beginning of the study in 4 age groups of 2, 3, 4, and 5 yrs. Each group of 4 boys and 4 girls was observed for 30 min periods for 9 mo, at regular 4-mo intervals. The developmental trend of free play activities was measured for the duration of the activities and classified qualitatively into 3 categories: (1) cognitive, (2) practical (manipulations, movements, social communications), and (3) symbolic. The children were involved in all 3 play categories independently or within mutual social activities. Results show that with age children's ability to stay involved in one play became stronger, the number of practical manipulative plays was lowered, symbolic plays became more frequent, the number of independent plays diminished, and the number of social plays rose. (Russian & English abstracts) (PsycINFO Database Record (c) 2012 APA, all rights reserved)

SN - 0555-5574

UR - <http://search.ebscohost.com/login.aspx?direct=true&db=psych&AN=1993-87128-001&site=ehost-live>

ER -

TY - BOOK

ID - 1837

T1 - Incest-related syndromes of adult psychopathology

A1 - Kluft,Richard P.

Y1 - 1990///

N1 - Accession Number: 1990-98769-000. First Author & Affiliation: Kluft, Richard P.; Temple U, School of Medicine, Clinical Professor of Psychiatry, Philadelphia, PA, US. Release Date: 19900101. Publication Type: Book, (0200); Edited Book, (0280); . Media Covered: Print. Book Type: Conference Proceedings. ISBN: 0-88048-160-9, Hardcover, 0880481609. Language: English. Conference Note: This book is based on a symposium held at the 140th Annual Meeting of the American Psychiatric Association in Chicago, Illinois, May 1987. Major Descriptor: Early Experience; Incest; Psychopathology. Minor Descriptor: Child Abuse; Sexual Abuse; Victimization. Classification: Behavior Disorders & Antisocial Behavior (3230) . Population: Human (10); . Age Group: Adulthood (18 yrs & older) (300) . Intended Audience: Psychology: Professional & Research (PS)

KW - PsycInfo

KW - Unsupervised Play Addition

KW - discusses the clinical psychopathology seen in adult patients who suffered childhood incestuous exploitation

KW - Early Experience

KW - Incest

KW - Psychopathology

KW - Child Abuse

KW - Sexual Abuse

KW - Victimization

RP - NOT IN FILE

A2 - Kluft, Richard P.

CY - Washington, DC US

PB - American Psychiatric Association

N2 - (from the introduction) "Incest-Related Syndromes of Adult Psychopathology" attempts to consolidate findings that bear on the clinical presentations of adult patients who have suffered childhood incestuous exploitation. Although there are many accounts of incest now available from the lay literature (Armstrong 1983; Bass and Davis 1988; Bass and Thornton 1983), there is much less about how incest presents in such a manner that it and its impact can be minimized, discounted, or denied or appear to play such a peripheral role in a clinical situation that its importance remains unrecognized. Because the study of the incestuous experiences of boys and their long-term consequences is a rather new and undeveloped field of inquiry in comparison to the exploration of the incestuous experiences of girls and their sequelae, "Incest-Related Syndromes of Adult Psychopathology" focuses almost exclusively on the plight of the female victim of incest. (introduction) (from the jacket) This book explores the connections between incest and somatoform disorders, disturbances of the self, problems in cognitive functioning, borderline psychopathology, the dissociative disorders, posttraumatic symptoms, vulnerability to revictimization, and other crucial issues. (PsycINFO Database Record (c) 2012 APA, all rights reserved) (jacket)

SN - 0-88048-160-9

UR - <http://search.ebscohost.com/login.aspx?direct=true&db=psych&AN=1990-98769-000&site=ehost-live>

ER -

TY - JOUR

ID - 1838

T1 - Finding the Music in Psychoanalytic Study

A1 - Davis, Harold B.

Y1 - 1989/10//

KW - PsycInfo

KW - Unsupervised Play Addition

KW - ego psychology

KW - Psychoanalysis

KW - CHILDREN

KW - Play

KW - Childhood Development

KW - Childhood Play Development

KW - Ego

RP - NOT IN FILE

SP - 937

EP - 938

JF - PsycCRITIQUES

VL - 34

IS - 10

CY - US

PB - American Psychological Association

N2 - Originally published in Contemporary Psychology: APA Review of Books, 1989, Vol 34(10), 937-938. Reviews the book, "The Psychoanalytic Study of the Child, Vol. 42" by Albert J. Solnit and Peter B. Neubauer (Eds.) (1987). The current volume devotes its first section to Psychoanalytic Views of Play. The other sections are Clinical Papers, Freud and Theory Building, Applied Psychoanalysis, and a single entry under the title Psychoanalytic Education. Although the articles are primarily concerned with children, as befitting the title of the book, their relevance to adults is ever present. This volume is a collection of essays (i.e., personal attempts to explain observable phenomena). As such, it will serve well those committed to the concepts of classical psychoanalysis and ego psychology. It will also be helpful to all psychoanalytically oriented people, regardless of specific orientation, who can gain from the insights and inferences of experienced clinicians. (PsycINFO Database Record (c) 2012 APA, all rights reserved)

SN - 1554-0138

UR - <http://search.ebscohost.com/login.aspx?direct=true&db=psych&AN=2006-06491-039&site=ehost-live>

L3 - 10.1037/030672

ER -

TY - JOUR

ID - 1839

T1 - Variables associated with frequency of rumination in a boy with profound mental retardation

A1 - Humphrey, Frederick J.

A1 - Mayes, Susan D.

A1 - Bixler, Edward O.

A1 - Good, Carl

Y1 - 1989/09//

KW - PsycInfo

KW - Unsupervised Play Addition

KW - environmental &amp; interpersonal &amp; temporal variables &amp; frequency of rumination

KW - profoundly mentally retarded 12.8 yr old male

KW - Case Report

KW - Environment

KW - Ingestion

KW - Interpersonal Interaction

KW - Intellectual Development Disorder

KW - Activity Level

RP - NOT IN FILE

SP - 435

EP - 447

JF - Journal of Autism and Developmental Disorders

VL - 19

IS - 3

CY - Germany

PB - Springer

N2 - Investigated the relationships between frequency of rumination in a boy (chronological age 12 yrs 9 mo; mental age 11.5 mo) with profound mental retardation and a variety of environmental, interpersonal, and temporal variables during all waking hours over a 4-wk period. Low levels of rumination were associated with periods of special education programming (vs nonschool hours), individual attention (vs group activities and independent play), and time spent with caretakers who like the child (vs those who like him less). There was a mealtime effect (decreasing rumination as time elapsed following meals) and a time of day effect (increasing rumination as the day progressed). (PsycINFO Database Record (c) 2012 APA, all rights reserved)

SN - 1573-3432

UR - <http://search.ebscohost.com/login.aspx?direct=true&db=psych&AN=1990-01749-001&site=ehost-live>

L3 - 10.1007/BF02212941

ER -

TY - JOUR

ID - 1840

T1 - Pretend play with mothers and siblings: Relations between early performance and partners

A1 - Dale,Naomi

Y1 - 1989/09//

KW - PsycInfo

KW - Unsupervised Play Addition

KW - cooperative pretend play

KW - 2 yr olds playing with mother vs 4-5 yr old sibling

KW - Childhood Play Behavior

KW - Mother Child Relations

KW - Pretend Play

KW - Sibling Relations

RP - NOT IN FILE

SP - 751

EP - 759

JF - Journal of Child Psychology and Psychiatry

VL - 30

IS - 5

CY - United Kingdom

PB - Blackwell Publishing

N2 - Investigated whether 9 2-yr-old infants' cooperative pretend play varies when playing with their mother and 4-5 yr old sibling. Results suggest marked differences in frequency of production of various transformational types in each social setting, and one type of play only appears in games with the sibling. Possible facilitation by the play partner is discussed. In the difference between the children's social and independent play, mothers seemed either to have no effect on their child's play or enhance what has generally been considered a fairly low level of pretend play. (PsycINFO Database Record (c) 2012 APA, all rights reserved)

SN - 1469-7610

UR - <http://search.ebscohost.com/login.aspx?direct=true&db=psyh&AN=1990-04222-001&site=ehost-live>

L3 - 10.1111/j.1469-7610.1989.tb00787.x

ER -

TY - JOUR

ID - 1841

T1 - Music of the self and others: Longitudinal observations on musical giftedness

A1 - Pruett,Kyle D.

Y1 - 1989///

KW - PsycInfo

KW - Unsupervised Play Addition

KW - development of musical giftedness

KW - 22 yr old females observed since 8 & 9 yrs

KW - Gifted

KW - Musical Ability

KW - Longitudinal Studies

RP - NOT IN FILE

SP - 87

EP - 100

JF - The Psychoanalytic Study of the Child

VL - 44

CY - US

PB - Yale University Press

N2 - Presents findings from an ongoing observational study of musical giftedness as it was being experienced by young music-makers at various developmental stages, focusing on the transition from adolescence to adulthood. Examples are presented of 2 girls' (observed from the ages of 8 and 9 to 22 yrs) experience of the simultaneous exhibition, enjoyment, and expansion of the musical gift while dealing with the unique problem of their body serving as the medium to express that gift. Topics include notions of the self, the role of significant others, "play" in the playing of music, creativity as generativity, and the role of normal narcissism in the life of the young musician. (PsycINFO Database Record (c) 2012 APA, all rights reserved)

SN - 0079-7308

UR - <http://search.ebscohost.com/login.aspx?direct=true&db=psyh&AN=1990-09418-001&site=ehost-live>

ER -

TY - JOUR

ID - 1843

T1 - The theraplay approach to the self-contained patient

A1 - Jernberg,Ann M.

Y1 - 1988///

KW - PsycInfo

KW - Unsupervised Play Addition

KW - theraplay treatment approach

KW - intimacy avoidance due to early disruption in attachment & bonding experience

KW - self contained 14 yr old male & adult female

KW - Client Characteristics

KW - Intimacy

KW - Psychotherapeutic Techniques

KW - Attachment Behavior

KW - Early Experience

KW - Play Therapy

KW - Social Isolation

RP - NOT IN FILE

SP - 85

EP - 93

JF - Psychotherapy Patient

VL - 4

IS - 3-4

CY - US

PB - Haworth Press

N2 - Discusses intimacy-avoidance as a result of a disruption in the process of parent-child attachment due to adoption, temperamental mismatch, parental exploitation, or other forms of parental unavailability. Therapists may assist patients in overcoming their self-containing life resolve by determining their patients' early attachment history and by relating to them as parent to small child on the level they presumably stopped their emotional growth. Cases of 2 self-contained patients (a 14-yr-old boy and an adult female) are presented. Theraplay, a treatment modality based on normal parent-infant interaction, is described as it relates to the 2 cases. (PsycINFO Database Record (c) 2012 APA, all rights reserved)

SN - 0738-6176

UR - <http://search.ebscohost.com/login.aspx?direct=true&db=psyh&AN=1989-33805-001&site=ehost-live>

L3 - 10.1300/J358v04n03\_09

ER -

TY - JOUR

ID - 1844

T1 - The holding/letting go dialectic as a factor in the recovery of learning

A1 - Greenhalgh,Paul

Y1 - 1987///

KW - PsycInfo

KW - Unsupervised Play Addition

KW - holding & letting go of disturbing feelings & behavior

KW - recovery of learning  
 KW - junior high school student  
 KW - Behavior Problems  
 KW - Emotional Disturbances  
 KW - School Counseling  
 KW - School Learning  
 KW - Junior High School Students  
 RP - NOT IN FILE  
 SP - 37  
 EP - 43  
 JF - Maladjustment & Therapeutic Education  
 VL - 5  
 IS - 3  
 CY - United Kingdom  
 PB - Taylor & Francis  
 N2 - Explores the holding and letting go of disturbing feelings and behavior that interfere with learning. It is suggested that children need to experience holding of these feelings and that they need to let go of them in order to explore their relations with the unconscious. These processes are illustrated through the case of an English boy in the 2nd year of junior school. Disturbing feelings and behavior are held through the processes of providing a mirror, a container, and a safety net. The process of letting the child go into necessary imagination and play is made possible by providing a relaxed, reliable setting where the child can forget the presence of adults and still internalize their availability. The qualities of adult presence that make this possible are described. (PsycINFO Database Record (c) 2012 APA, all rights reserved)  
 SN - 0264-4614  
 UR - <http://search.ebscohost.com/login.aspx?direct=true&db=psyh&AN=1989-06818-001&site=ehost-live>  
 ER -

TY - JOUR  
 ID - 1845  
 T1 - Generalized reduction of disruptive behavior in unsupervised settings through specific toy training  
 A1 - Santarcangelo,Suzanne  
 A1 - Dyer,Kathleen  
 A1 - Luce,Stephen C.  
 Y1 - 1987///  
 KW - PsycInfo  
 KW - Unsupervised Play Addition  
 KW - specific toy training  
 KW - disruptive behavior & generalization & maintenance of appropriate play  
 KW - autistic 5-13 yr olds  
 KW - Autism  
 KW - Behavior Modification  
 KW - Behavior Problems  
 KW - Childhood Play Behavior  
 KW - Generalization (Learning)  
 KW - Differential Reinforcement  
 KW - Toys  
 RP - NOT IN FILE  
 SP - 38  
 EP - 44  
 JF - Journal of the Association for Persons with Severe Handicaps  
 VL - 12  
 IS - 1  
 CY - US  
 PB - Assn for Persons with Severe Handicaps  
 N2 - In Exp I, 2 autistic students (aged 5 and 9 yrs) were exposed to training consisting of differential reinforcement of appropriate play, verbal feedback and prompts for inappropriate play or disruptive behaviors,



and a specific toy training condition that involved extrinsic reinforcement of specific components of toy play. This training resulted in decreases in disruptive behaviors accompanied by generalization and maintenance of appropriate play in an unsupervised setting. In Exp II, 2 additional autistic Ss (aged 6 and 13 yrs) exposed to the specific toy training procedure showed similar decreases in disruptive behaviors accompanied by generalization and maintenance of play skills. (PsycINFO Database Record (c) 2012 APA, all rights reserved)

SN - 0274-9483

UR - <http://search.ebscohost.com/login.aspx?direct=true&db=psyh&AN=1988-20955-001&site=ehost-live>

ER -

TY - JOUR

ID - 1846

T1 - Outpatient treatment of pica in a developmentally delayed child

A1 - Kalfus, Grace R.

A1 - Fisher-Gross, Susan

A1 - Marvullo, Mary A.

A1 - Nau, Paul A.

Y1 - 1987///

KW - PsycInfo

KW - Unsupervised Play Addition

KW - overcorrection & differential reinforcement

KW - pica

KW - nonverbal developmentally delayed 4 yr old

KW - Delayed Development

KW - Differential Reinforcement

KW - Overcorrection

RP - NOT IN FILE

SP - 49

EP - 63

JF - Child & Family Behavior Therapy

VL - 9

IS - 3-4

CY - US

PB - Haworth Press

N2 - Evaluated the effectiveness of overcorrection and differential reinforcement to reduce pica in a 4-yr-old nonverbal developmentally delayed boy. Parents and classroom staff were trained as mediators of treatment by a behavioral consultant. Despite the effectiveness of the procedure, treatment mediators terminated intervention due to its aversive nature. Therefore, an alternative program consisting of positive reinforcement and time-out was implemented according to a reversal design. Pica was measured via direct observation and parental monitoring during a variety of activities, including fine motor tasks, gross motor play, and independent play. Results indicate clear reductions in pica as a result of both interventions. (PsycINFO Database Record (c) 2012

APA, all rights reserved)

SN - 1545-228X

UR - <http://search.ebscohost.com/login.aspx?direct=true&db=psyh&AN=1988-36589-001&site=ehost-live>

L3 - 10.1300/J019v09n03\_04

ER -

TY - JOUR

ID - 1847

T1 - Communicating with persons with severe handicaps: Roles of parents and professionals

A1 - MacDonald, James D.

A1 - Gillette, Yvonne

Y1 - 1986///

KW - PsycInfo

KW - Unsupervised Play Addition

KW - solo & social play & nonverbal communication & language & conversation as stages in communication development

KW - strategies for parents & teachers for facilitative interaction  
KW - children with severe language delays  
KW - Developmental Stages  
KW - Interpersonal Interaction  
KW - Language Delay  
KW - Communication Skills  
KW - Conversation  
KW - Nonverbal Communication  
KW - Parent Child Relations  
KW - Teacher Student Interaction  
KW - Verbal Communication  
RP - NOT IN FILE  
SP - 255  
EP - 265  
JF - Journal of the Association for Persons with Severe Handicaps  
VL - 11  
IS - 4  
CY - US  
PB - Assn for Persons with Severe Handicaps  
N2 - Presents guidelines for adult-child interactions, based on research with a new model for teaching social interaction and communication to children with severe language delays. Five stages of communication development between adult and child are identified, and 4 major developmental areas are described in terms of the establishment of social-communication habits. For each of these areas (social play, communication, language, and conversation), specific problems and strategies for enhancing communication development are discussed. Implications of the model for service delivery, for reevaluation of the roles of parents and professionals, and for understanding the importance of social interaction in the development of language and communication are noted. A screening tool for identifying problems and strengths and preparing training goals is presented. (PsycINFO Database Record (c) 2012 APA, all rights reserved)  
SN - 0274-9483  
UR - <http://search.ebscohost.com/login.aspx?direct=true&db=psych&AN=1988-11624-001&site=ehost-live>  
ER -  
  
TY - JOUR  
ID - 1848  
T1 - Unstructured play in hospital settings: An internal locus of control rationale  
A1 - Bolig,Rosemary  
A1 - Fernie,David E.  
A1 - Klein,Elisa L.  
Y1 - 1986///  
KW - PsycInfo  
KW - Unsupervised Play Addition  
KW - Locus of Control  
KW - unstructured play  
KW - Hospitalized Children  
KW - implications for role of adults  
KW - Childhood Play Behavior  
KW - Coping Behavior  
KW - Hospitalized Patients  
KW - Internal External Locus of Control  
KW - Roles  
RP - NOT IN FILE  
SP - 101  
EP - 107  
JF - Children's Health Care  
JA - Child Health Care  
VL - 15

IS - 2

CY - US

PB - Lawrence Erlbaum

N2 - Presents a locus-of-control rationale for unstructured play in hospital settings and presents implications for adults' roles in young children's play that enhance their internal perception of control. (PsycINFO Database Record (c) 2012 APA, all rights reserved)

SN - 1532-6888

UR - <http://search.ebscohost.com/login.aspx?direct=true&db=psych&AN=1988-05557-001&site=ehost-live>

L3 - 10.1207/s15326888chc1502\_8

ER -

TY - JOUR

ID - 1850

T1 - Mom or Dad says I shouldn't: Supervised and unsupervised children's knowledge of their parents' rules for home safety

A1 - Peterson,Lizette

A1 - Mori,Lisa

A1 - Scissors,Cathy

Y1 - 1986/06//

KW - PsycInfo

KW - Unsupervised Play Addition

KW - knowledge of & adherence to parents' perceptions of worrisome problems & rules for home safety

KW - supervised vs unsupervised 8-10.6 yr olds

KW - implications for child accident prevention & health & home security

KW - Home Environment

KW - Parental Absence

KW - Parental Attitudes

KW - Safety

KW - Permissive Parenting

KW - Knowledge Level

RP - NOT IN FILE

SP - 177

EP - 188

JF - Journal of Pediatric Psychology

JA - J Pediatr Psychol.

VL - 11

IS - 2

CY - United Kingdom

PB - Oxford Univ Press

N2 - 32 parents of schoolchildren (aged 8 yrs to 10 yrs 7 mo) completed a questionnaire concerning what at-home problems were important and worrisome and what rules parents had generated concerning potential problem situations; the questionnaire also suggested several rules that parents and children might or might not adhere to, asking for acceptance or rejection of these rules. The children were asked the same questions in an interview. The parents' responses to the questionnaire showed that they rated emergency situations, encounters with strangers, and play location as presenting important and worrisome problems; that they had formulated multiple rules concerning their children's behavior in these situations; and that they believed their children were aware of these rules. However, the children's interview responses indicated that children who were left unsupervised once, 2-3 times, or more than 4 times a week, as well as children who were never left alone, were largely unaware of their parents' rules. Implications for child accident prevention, child health, and child home security are discussed. (14 ref) (PsycINFO Database Record (c) 2012 APA, all rights reserved)

SN - 1465-735X

UR - <http://search.ebscohost.com/login.aspx?direct=true&db=psych&AN=1986-26932-001&site=ehost-live>

L3 - 10.1093/jpepsy/11.2.177

ER -

TY - JOUR

ID - 1851

T1 - The role of attentiveness, mobility history, and separation of hiding sites on Stage IV search behavior

A1 - Horobin, Karen

A1 - Acredolo, Linda

Y1 - 1986/02//

KW - PsycInfo

KW - Unsupervised Play Addition

KW - visual attentiveness &amp; search behavior &amp; duration of independent mobility

KW - performance on object permanence task

KW - 8-10 mo olds

KW - Attention

KW - Object Permanence

KW - Perceptual Development

KW - Visual Search

RP - NOT IN FILE

SP - 114

EP - 127

JF - Journal of Experimental Child Psychology

JA - J Exp. Child Psychol.

VL - 41

IS - 1

CY - Netherlands

PB - Elsevier Science

N2 - Investigated the relationship between visual attentiveness, search behavior, and duration of independent mobility for 56 8-10 mo olds presented with 3 versions of the Stage IV object permanence task. The number and spatial separation of hiding sites was manipulated to explore the role of these factors on visual attention and search performance. In a repeated-measures design, perseverative search errors were less likely on both a 2- and a 6-location task with equally wide separation of the A and B hiding sites than on a 2-location task with A and B close together, thus indicating that spatial separation of sites is a more important contributor to successful search than number of hiding sites alone. Visual attentiveness was significantly associated with correct search at B in all 3 versions of the task. A significant developmental relationship was found between the length of time Ss had been independently mobile and visual attentiveness during the hiding procedure. Findings are discussed in terms of the transition to self-produced mobility and expanding spatial experience in the 2nd half of the 1st yr and how visual attentiveness and search performance might improve as a function of such changes. (14 ref) (PsycINFO Database Record (c) 2012 APA, all rights reserved)

SN - 0022-0965

UR - <http://search.ebscohost.com/login.aspx?direct=true&db=psych&AN=1986-16921-001&site=ehost-live>

L3 - 10.1016/0022-0965(86)90054-8

ER -

TY - JOUR

ID - 1852

T1 - Action field and language use in child-child interactions

A1 - Bokus, Barbara

Y1 - 1986///

KW - PsycInfo

KW - Unsupervised Play Addition

KW - initiation of peer interaction

KW - perceived self &amp; peer action field &amp; indicative vs descriptive utterances

KW - dyads of 3-5 yr olds

KW - Interpersonal Communication

KW - Peer Relations

KW - Social Interaction

KW - Social Perception

RP - NOT IN FILE

SP - 197

EP - 206

JF - Polish Psychological Bulletin

VL - 17

IS - 3-4

CY - Poland

PB - Blackhorse Publishing

N2 - Investigated how 24 dyads of children (aged 3-5 yrs) perceived play situations in which they initiated social interaction. Ss presented to an adult their own action field and that ascribed to the other child in ongoing play. Observations were made of nonverbal and verbal modes used in presenting the 2 action fields, either as 1 shared by both or as 2 separate fields. The manner in which each S initiated ensuing social interactions in the play conditions was analyzed (i.e., how the initiator drew the partner into his/her activity). Results show Ss used 2 types of utterances: indicative or descriptive. It is concluded that the child takes into account the partner as agent of activity and this alters the child's use of language. (PsycINFO Database Record (c) 2012 APA, all rights reserved)

SN - 1641-7844

UR - <http://search.ebscohost.com/login.aspx?direct=true&db=psyh&AN=1988-23061-001&site=ehost-live>

ER -

TY - JOUR

ID - 1853

T1 - The influence of home, dispositional, and setting variables on the proximity of preschool children to activities, peers, and adults

A1 - Giblin,Paul T.

A1 - Tzelepis,Angela

Y1 - 1985/09//

KW - PsycInfo

KW - Unsupervised Play Addition

KW - home environment & personality

KW - proximity to activities & peers & adults

KW - preschoolers

KW - Activity Level

KW - Home Environment

KW - Interpersonal Interaction

KW - Peers

KW - Personality Traits

RP - NOT IN FILE

SP - 319

EP - 331

JF - The Journal of Genetic Psychology: Research and Theory on Human Development

VL - 146

IS - 3

CY - US

PB - Heldref Publications

N2 - Observed 25 preschool children and 7 adult female caregivers during scan sampling of morning free-play periods. Children's movements, locations, and proximities to adults, peers, and activities were recorded for 15 min each day for 5 days. Adult caretakers also rated Ss' dependency and autonomous achievement striving, and parents completed questionnaires assessing the Ss' home environments. Data indicate that proximities to activities were related to the presence of adults and peers. Adults were proximal to small-motor activities, and peers were proximal to fantasy activities. Dependency and autonomy also were related to proximities to activities. Dependent children were unlikely to be proximal to reading activities but were often near large-motor activities. Autonomous children spent little time near eating and bathroom areas. Home environments varied most notably on the frequency of adult involvement in child activities. High adult involvement at home was correlated negatively with autonomy. (22 ref) (PsycINFO Database Record (c) 2012 APA, all rights reserved)

SN - 1940-0896

UR - <http://search.ebscohost.com/login.aspx?direct=true&db=psyh&AN=1986-19668-001&site=ehost-live>

L3 - 10.1080/00221325.1985.9914461

ER -

TY - JOUR

ID - 1854

T1 - The social cognitive ecology of preschool classrooms: Contextual relations revisited

A1 - Pellegrini,Anthony D.

Y1 - 1984/09//

KW - PsycInfo

KW - Unsupervised Play Addition

KW - adult vs peer presence

KW - social cognitive aspects of play behavior

KW - 3 & 4 yr old preschool students

KW - Childhood Play Behavior

KW - Classroom Environment

KW - Cognitive Processes

KW - Preschool Students

RP - NOT IN FILE

SP - 321

EP - 332

JF - International Journal of Behavioral Development

VL - 7

IS - 3

CY - US

PB - Elsevier Science, Inc.

N2 - 10 3- and 10 4-yr-olds were observed in their preschool classrooms during free play to examine the extent to which social cognitive aspects of their play behaviors varied according to 2 classroom contextual variables: presence in different learning centers and participants (number of children and adults present) in those centers. Results indicate that Ss behaved differently according to these variables. Ss engaged in lower-order social-cognitive behaviors in art centers than they did in blocks and housekeeping centers. Adult presence was related to less mature forms of play, whereas peer presence was related to more mature forms of play. Data indicate that peer presence and adult absence relate to more mature forms of children's social cognitive play and support Piagetian notions of peer interaction and cognitive development. (21 ref) (PsycINFO Database Record (c) 2012 APA, all rights reserved)

SN - 1464-0651

UR - <http://search.ebscohost.com/login.aspx?direct=true&db=psyh&AN=1985-10788-001&site=ehost-live>

L3 - 10.1016/S0163-6383(84)80383-5

ER -

TY - JOUR

ID - 1855

T1 - Overjustification: A self-perception perspective

A1 - Newman,Joan

A1 - Layton,Bruce D.

Y1 - 1984/09//

KW - PsycInfo

KW - Unsupervised Play Addition

KW - internal interest & reward magnitude

KW - preference for interesting vs uninteresting toy

KW - 1st & 2nd graders

KW - Motivation

KW - Preferences

KW - Rewards

KW - Toys

KW - Self Perception

KW - Toy Selection

RP - NOT IN FILE

SP - 419

EP - 425

JF - Personality and Social Psychology Bulletin

VL - 10

IS - 3

CY - US

PB - Sage Publications

N2 - Self-perception theory predicts a decrease in preference for a rewarded activity (the overjustification effect) only when 2 conditions are met: Internal interest in the activity is high, and the reward is perceived as more than adequate justification for performance. To test this prediction, internal interest was established that was uncontaminated by external factors. Such baseline measures were provided by unrequired, unsupervised, and unrewarded play with target toys. In a 2x3 factorial design, 60 1st- and 2nd-grade children played with an interesting or uninteresting toy and were given 1 of 3 levels of reward for their play. An additional 22 1st and 2nd graders provided a baseline measure of internal interest in the toys by playing with them alone and unrewarded. The predicted interaction of internal interest and reward size was found on behavioral indices of play following the reward period. Compared to the baseline, increasing reward size was associated with a decrease in preference for the interesting toy but not for the uninteresting one. (12 ref) (PsycINFO Database Record (c) 2012 APA, all rights reserved)

SN - 1552-7433

UR - <http://search.ebscohost.com/login.aspx?direct=true&db=psych&AN=1985-22387-001&site=ehost-live>

L3 - 10.1177/0146167284103010

ER -

TY - JOUR

ID - 1856

T1 - Short-term treatment outcome using parents as co-therapists for their own autistic children

A1 - Short, Andrew B.

Y1 - 1984/07//

KW - PsycInfo

KW - Unsupervised Play Addition

KW - training &amp; use of parents as co-therapists in developmental treatment

KW - short term treatment outcome

KW - autistic 2.3-7.5 yr olds

KW - Autism

KW - Behavior Therapy

KW - Parent Training

KW - Treatment Effectiveness Evaluation

RP - NOT IN FILE

SP - 443

EP - 458

JF - Journal of Child Psychology and Psychiatry

VL - 25

IS - 3

CY - United Kingdom

PB - Blackwell Publishing

N2 - Evaluated the effects of E. Schopler and R. J. Reichler's (see record 1972-05273-001) developmental treatment for autistic children, which uses parents as co-therapists. 15 children (aged 2.3-7.5 yrs) were followed during waiting and treatment periods. Direct behavioral observations, a blind rating of family stress based on interviews with mothers, and 2 questionnaires were used to assess outcome. All data were collected during home visits. The therapeutic training skills of the parents focused on developmental assessment of skills, communication at a level appropriate for the child, presenting appropriate tasks, presenting materials in a teaching setting, and the effective use of reinforcement and time-out. Significant treatment effects were found for appropriate child behavior and parental involvement. Treatment effects were not shown for inappropriate child behavior and the measure of family stress and adaptation. Data are presented that suggest a positive change with treatment in parent-child interaction patterns. A lack of change in independent play is noted.

Questionnaire responses indicated that parents saw the treatment as helpful. (46 ref) (PsycINFO Database Record (c) 2012 APA, all rights reserved)

SN - 1469-7610

UR - <http://search.ebscohost.com/login.aspx?direct=true&db=psyh&AN=1984-32110-001&site=ehost-live>

L3 - 10.1111/j.1469-7610.1984.tb00163.x

ER -

TY - JOUR

ID - 1857

T1 - A multimethod assessment and intervention with a socially rejected child

A1 - Petersen, Nancy J.

A1 - Moe, Glen L.

Y1 - 1984///

KW - PsycInfo

KW - Unsupervised Play Addition

KW - multimethod intervention

KW - Social Skills

KW - socially rejected 9 yr old Mexican American female

KW - Social Acceptance

KW - Social Skills Training

KW - Case Report

KW - Mexican Americans

RP - NOT IN FILE

SP - 391

EP - 396

JF - School Psychology Review

VL - 13

IS - 3

CY - US

PB - National Assn of School Psychologists

N2 - Describes a 9-yr-old Mexican-American female whose attempts to control other children led to negative peer interactions, social rejection and isolation, and excessive interactions with adults. Significant improvements were achieved through a multimethod intervention that combined structured teaching sessions, role playing and feedback, observation of a social model, supervised and unsupervised play, and generalization exercises. (8 ref) (PsycINFO Database Record (c) 2012 APA, all rights reserved)

SN - 0279-6015

UR - <http://search.ebscohost.com/login.aspx?direct=true&db=psyh&AN=1985-04742-001&site=ehost-live>

ER -

TY - JOUR

ID - 1858

T1 - 'Call the police, okay?': Social comparison by young children during play in preschool

A1 - Chafel, Judith A.

Y1 - 1984/03//

KW - PsycInfo

KW - Unsupervised Play Addition

KW - cognitive uncertainty & social comparison

KW - elicitation of understanding from peer

KW - 3-5 yr olds

KW - Childhood Play Behavior

KW - Peer Relations

KW - Social Comparison

RP - NOT IN FILE

SP - 201

EP - 216

JF - Early Child Development and Care



VL - 14

IS - 3-4

CY - United Kingdom

PB - Taylor & Francis

N2 - Describes and analyzes several examples of data drawn from naturalistic observations of 3-, 4-, and 5-year-old children enrolled in nursery schools serving predominantly White, middle-class families to examine situations in which young children use social comparison to elicit understanding from a peer due to cognitive uncertainty. These situations are described as requests for information, agreement, permission, compliance, verbal responsiveness, and attention. Peer exchanges indicated that the Ss were socially competent. On the whole, they accurately sized up a social situation and successfully elicited verbal feedback from a peer that could be used to check their understanding. Since Ss were able to sustain cohesive verbal exchanges unsupervised by adults, it is contended that Piaget's global construct of egocentrism in young children needs revision. Implications for the use of tag expression across a wide variety of activity settings and developmental ages and for teacher behaviors are discussed. (34 ref) (PsycINFO Database Record (c) 2012 APA, all rights reserved)

SN - 1476-8275

UR - <http://search.ebscohost.com/login.aspx?direct=true&db=psyh&AN=1985-06347-001&site=ehost-live>

L3 - 10.1080/0300443840140303

ER -

TY - JOUR

ID - 1859

T1 - 'Conversazioni' tra bambini di due anni. Intenzioni comunicative e scambi dialogici

A1 - Morra Pellegrino, Maria L.

A1 - Scopesi, Alda

A1 - D'Aniello, Paola

Y1 - 1984/02//

KW - PsycInfo

KW - Unsupervised Play Addition

KW - adult presence in group play

KW - communicative intentions & dialogue

KW - 2 yr olds

KW - Childhood Play Behavior

KW - Conversation

KW - Interpersonal Influences

KW - Peer Relations

RP - NOT IN FILE

SP - 52

EP - 65

JF - Et... Evolutiva

VL - 17

CY - Italy

PB - Giunti Gruppo Editoriale SPA

N2 - Studied 26 small groups of 2-year-olds (3 Ss in each group) by observing their play for 20 min; Ss were acquainted with each other and were accompanied by a caretaker who participated in their play activity and conversation during the 1st half of the observation and then left the group. Verbal interactions were taped, and context and nonverbal behavior were noted. Analysis showed that Ss used different verbal styles when they communicated with an adult than when they communicated with peers, and they produced more sequential dialog when playing by themselves without an adult; when an adult was present, Ss talked more to her than to peers. (26 ref) (PsycINFO Database Record (c) 2012 APA, all rights reserved)

SN - 0392-0658

UR - <http://search.ebscohost.com/login.aspx?direct=true&db=psyh&AN=1984-31112-001&site=ehost-live>

ER -

TY - CHAP

ID - 1860

T1 - Moral reasoning and behavior

A1 - Kaus, Cheryl R.

A1 - Lonky, Edward

A1 - Roodin, Paul

Y1 - 1984///

N1 - Accession Number: 1987-98579-007. First Author & Affiliation: Kaus, Cheryl R.. Translated Book Series Title: Guidance and counseling series. Release Date: 19970801. Publication Type: Book, (0200); Edited Book, (0280); . Media Covered: Print. Document Type: Chapter. Book Type: Handbook/Manual. ISBN: 0-8077-2884-5, Paperback, 0807728845. Language: English. Major Descriptor: Adolescent Development; Moral Development; Morality; Reasoning. Minor Descriptor: Activism; Cheating; Cognitive Development; Juvenile Delinquency; Psychosocial Factors; Theories. Classification: Psychosocial & Personality Development (2840) . Population: Human (10); . Age Group: Adolescence (13-17 yrs) (200) . Intended Audience: Psychology: Professional & Research (PS) . Page Count: 51

KW - PsycInfo

KW - Unsupervised Play Addition

KW - theories of & factors affecting moral development & reasoning & behavior

KW - Adolescents

KW - Adolescent Development

KW - Moral Development

KW - Morality

KW - Reasoning

KW - Activism

KW - Cheating

KW - Cognitive Development

KW - Juvenile Delinquency

KW - Psychosocial Factors

KW - Theories

RP - NOT IN FILE

SP - 231

EP - 281

T2 - Experiencing adolescents: A sourcebook for parents, teachers, and teens

A2 - Lerner, Richard M.

A2 - Galambos, Nancy L.

CY - New York, NY US

PB - Teachers College Press

T3 - Guidance and counseling series

N2 - (from the chapter) [discuss] how the transitions from childhood to adolescent morality came about and . . . exactly what makes the morality of adolescents somewhat different in character from that of adults / [present] an overview of the major theoretical orientations which have served to guide and direct the psychological investigation of moral development / describes how adolescents think about morality, and the role their reasoning may play in influencing moral behavior / examine 3 areas of adolescent moral behavior: academic cheating, juvenile delinquency, and student activism / explore the influence of individual, family, and situational factors on these behaviors / [explore the question] what role can our schools play in attempting to influence moral development / present overviews of 2 current approaches to moral education: values clarification and the cognitive-developmental approach (chapter)

frameworks to understand morality [psychoanalytic view, social learning view, cognitive developmental view / the impact of parents / influence of parenting style on morality / impact of peers on morality / characteristics of moral reasoning in adolescence [idealistic thinking, social thought, reasoning about law and justice, relativistic thinking] / religious orientation (PsycINFO Database Record (c) 2012 APA, all rights reserved) (chapter)

SN - 0-8077-2884-5

UR - <http://search.ebscohost.com/login.aspx?direct=true&db=psych&AN=1987-98579-007&site=ehost-live>

ER -

TY - JOUR

ID - 1864

T1 - Children's responses to moral and social conventional transgressions in free-play settings

A1 - Nucci,Larry P.  
A1 - Nucci,Maria S.  
Y1 - 1982/10//  
KW - PsycInfo  
KW - Unsupervised Play Addition  
KW - responses to moral & social conventional transgressions during unsupervised free play  
KW - male vs female 7-10 vs 11-14 yr olds  
KW - Age Differences  
KW - Antisocial Behavior  
KW - Childhood Play Behavior  
KW - Human Sex Differences  
KW - Morality  
KW - Responses  
RP - NOT IN FILE  
SP - 1337  
EP - 1342  
JF - Child Development  
JA - Child Dev.  
VL - 53  
IS - 5  
CY - United Kingdom  
PB - Blackwell Publishing  
N2 - Observed 20 7-24 yr olds' responses to naturally occurring moral and social conventional transgressions during unsupervised free play. Findings paralleled results of previous observational studies conducted in adult-governed (school) contexts by the authors (e.g., see record 1982-20767-001). It was found that Ss responded to both moral and conventional forms of transgression. Responses of both the younger (7-10 yr old) and older (11-24 yr old) Ss to moral transgressions revolved around the intrinsic (hurtful and unjust) consequences of acts on victims. Ss' responses to conventional breaches, in contrast, focused on aspects of the social order (i.e., rules, normative expectations). Sex differences in the use of specific forms of response to moral and conventional breaches were found. (14 ref) (PsycINFO Database Record (c) 2012 APA, all rights reserved)  
SN - 1467-8624  
UR - <http://search.ebscohost.com/login.aspx?direct=true&db=psych&AN=1983-03231-001&site=ehost-live>  
L3 - 10.2307/1129024  
ER -  
  
TY - JOUR  
ID - 1865  
T1 - Second order effects of peers on mother-toddler interaction  
A1 - Rubenstein,Judith L.  
A1 - Howes,Carollee  
A1 - Pedersen, Frank A.  
Y1 - 1982/04//  
KW - PsycInfo  
KW - Unsupervised Play Addition  
KW - presence of adult vs 13-29 mo old peer  
KW - mother-infant interaction  
KW - mothers & their 19 mo olds  
KW - Mother Child Relations  
KW - Peers  
KW - Social Influences  
RP - NOT IN FILE  
SP - 185  
EP - 194  
JF - Infant Behavior & Development  
JA - Infant behav  
VL - 5

IS - 2

CY - Netherlands

PB - Elsevier Science

N2 - Investigated the influence of adult and toddler peers on mother-toddler interaction in the natural home environment. Eight 19-mo-olds and their mothers were observed in 4 circumstances on 4 different days: (1) at home by themselves, (2) with a toddler peer (aged 13-29 mo), (3) with an adult peer, and (4) with a toddler peer and an adult peer. In the presence of a toddler peer, toddlers made fewer instrumental and distal social bids to their mothers. Presence of an adult peer or mother without a toddler peer increased Ss' tactile and proximal bids to mother. Maternal affect expression, both positive and negative, was intensified in the absence of the peers. Higher-level reciprocal toddler peer play was more frequent in the absence of the adult peer. Findings are interpreted in terms of different types of second order effects. (20 ref) (PsycINFO Database Record (c) 2012 APA, all rights reserved)

SN - 0163-6383

UR - <http://search.ebscohost.com/login.aspx?direct=true&db=psyh&AN=1983-03317-001&site=ehost-live>

L3 - 10.1016/S0163-6383(82)80027-1

ER -

TY - JOUR

ID - 1866

T1 - Can television teach prosocial behavior?

A1 - Lovelace, Valeria O.

A1 - Huston, Aletha C.

Y1 - 1982///

KW - PsycInfo

KW - Unsupervised Play Addition

KW - TV programs

KW - conflict resolution strategy in transmission of prosocial ideas & behavior

KW - CHILDREN

KW - Conflict Resolution

KW - Prosocial Behavior

KW - Television

RP - NOT IN FILE

SP - 93

EP - 106

JF - Prevention in Human Services

VL - 2

IS - 1-2

CY - US

PB - Haworth Press

N2 - Reviews the effect of TV on children's learning and prosocial (PS) behavior and discusses the advantages and disadvantages of 3 methods of presenting PS content on TV. TV programs can transmit PS ideas and behavior to children from about age 3 yrs onward. The most effective method of conveying a PS message may be to present the PS behavior without any contrasting conflict or antisocial behavior. The conflict resolution strategy can also effectively convey PS behavior if there are a variety of models showing PS actions, if the PS resolution is given sufficient time and attention, and if viewing conditions are adequate. Because learning is often situation-specific, more generalized effects will result from showing ordinary people in a variety of everyday situations working together, helping each other, and being sensitive to each other. Dramatic story formats appear better suited than brief didactic bits for influencing children's behavior. In many cases, postviewing rehearsal, discussion, and related play can enhance the effects of the TV program. A 3rd technique, the presentation of unresolved conflict, can be useful in classroom or therapeutic situations where an adult can guide postviewing and discussion and activity, but it has unknown effects in unsupervised circumstances. (48 ref) (PsycINFO Database Record (c) 2012 APA, all rights reserved)

SN - 0270-3114

UR - <http://search.ebscohost.com/login.aspx?direct=true&db=psyh&AN=1983-27684-001&site=ehost-live>

L3 - 10.1300/J293v02n01\_08

ER -

TY - JOUR

ID - 1868

T1 - Reciprocal influence in the social interactions of mothers and three-year-old children from different socioeconomic backgrounds

A1 - Farran,Dale C.

A1 - Haskins,Ron

Y1 - 1980/09//

KW - PsycInfo

KW - Unsupervised Play Addition

KW - socioeconomic background

KW - social interaction during free play

KW - mothers & 3 yr olds

KW - Childhood Play Behavior

KW - Mother Child Relations

KW - Mothers

KW - Socioeconomic Status

RP - NOT IN FILE

SP - 780

EP - 791

JF - Child Development

JA - Child Dev.

VL - 51

IS - 3

CY - United Kingdom

PB - Blackwell Publishing

N2 - Observed the social interactions between 51 3-yr-olds and their mothers during a 20-min free-play laboratory session. These dyads were from 2 socioeconomic groups differing in income, education, and occupation. Middle-income dyads spent twice as much time in mutual play as low-income dyads; low-income mothers spent more time reading to themselves, and their children were more often in independent play or no clear activity. Results do not support previous work showing low-income mothers to be more controlling than middle-income mothers. A series of profile analyses using conditional probabilities indicated nearly identical dyadic processes in both groups of mothers and children. Controlling and interactive behaviors of mothers were inextricably linked to the presenting behaviors of children for both groups. Socioeconomic background had the effect of altering the quantity of certain behaviors but not fundamentally changing the pattern of mother-child interactions. (25 ref) (PsycINFO Database Record (c) 2012 APA, all rights reserved)

SN - 1467-8624

UR - <http://search.ebscohost.com/login.aspx?direct=true&db=psych&AN=1981-03168-001&site=ehost-live>

L3 - 10.2307/1129465

ER -

TY - JOUR

ID - 1869

T1 - Effects of adult-directed activity, number of toys, and sex of child on social and exploratory behavior in young children

A1 - Vlietstra,Alice G.

Y1 - 1980/07//

KW - PsycInfo

KW - Unsupervised Play Addition

KW - sex & number of toys & amount of adult direction in preschool environment

KW - manipulative vs exploratory vs social activities

KW - 2.3-3.8 yr olds

KW - Childhood Play Behavior

KW - Classroom Environment

KW - Human Sex Differences

KW - Nursery School Students

KW - Preschool Education  
KW - Exploratory Behavior  
KW - Social Interaction  
RP - NOT IN FILE  
SP - 231  
EP - 238  
JF - Merrill-Palmer Quarterly: Journal of Developmental Psychology  
VL - 26  
IS - 3  
CY - US  
PB - Wayne State University Press  
N2 - 73 2.3-3.10 yr old children from preschools with high or low levels of adult-directed activity were presented with bowls with lids to be opened that contained various common objects. An adult presented the bowls, under either adult-directed or child-directed conditions. One or 5 toys were present, and the S could choose to play with them at any time. Observers recorded the amount of time spent (a) opening bowls, (b) in social interaction, (c) manipulating objects from the bowls, and (d) playing with the other toys. High levels of adult direction increased the amount of time spent with the objects and bowls, and it had a stronger effect on social interaction than on manipulation of the objects. Levels of adult direction in the schools had similar effects. Ss spent more time with toys when 5 toys were available and in a 2nd session, when the task was no longer novel. Males were more exploratory than females, who engaged in more social interaction. Results should be considered in designing preschool environments. (10 ref) (PsycINFO Database Record (c) 2012 APA, all rights reserved)  
SN - 1535-0266  
UR - <http://search.ebscohost.com/login.aspx?direct=true&db=psyh&AN=1980-33366-001&site=ehost-live>  
ER -  
  
TY - JOUR  
ID - 1870  
T1 - The effects of adult presence on the prosocial behavior of preschool children  
A1 - Barton,Edward J.  
A1 - Olszewski,Mark J.  
A1 - Madsen,Jennifer J.  
Y1 - 1979///  
KW - PsycInfo  
KW - Unsupervised Play Addition  
KW - behavioral training in sharing & subsequent influence of peer presence & peer smiling & peer praise  
KW - unprogrammed generalization of physical sharing over time  
KW - preschoolers  
KW - Behavior Therapy  
KW - Interpersonal Influences  
KW - Peers  
KW - Response Generalization  
KW - Sharing (Social Behavior)  
KW - Observers  
RP - NOT IN FILE  
SP - 271  
EP - 286  
JF - Child Behavior Therapy  
VL - 1  
IS - 3  
PB - Haworth Press, Inc.  
N2 - Investigated the influence of adult presence, peer smiling, and peer praise on the unprogrammed generalization of physical sharing over time. During free play 3 groups of 5 preschoolers were taught to share toys via a behavioral training package composed of instructions, modeling, behavior rehearsal, prompts, and praise. Immediately after free play, Ss were given art materials and observed in the presence of different adults. For all Ss, regardless of the adult presence, treatment facilitated sharing in both the free-play and the art-activity

settings. In addition, 2 groups continued to share in both settings after the training. The presence of an adult was necessary for unprogrammed maintenance of treatment gains in both settings whereas peer smiling and peer praise were not. Observer presence suppressed physical sharing and smiling before, during, and after treatment. (25 ref) (PsycINFO Database Record (c) 2012 APA, all rights reserved)

SN - 0162-1416

UR - <http://search.ebscohost.com/login.aspx?direct=true&db=psyh&AN=1981-05987-001&site=ehost-live>

L3 - 10.1300/J473v01n03\_05

ER -

TY - JOUR

ID - 1871

T1 - When adult therapists work with children: Differential treatment considerations

A1 - Goggin, James E.

A1 - Goggin, Eileen B.

Y1 - 1979/06//

KW - PsycInfo

KW - Unsupervised Play Addition

KW - ethical principles & professional standards & diagnostic & treatment approaches

KW - treatment of children by adult therapists

KW - Child Psychotherapy

KW - Professional Ethics

KW - Professional Standards

KW - Psychotherapeutic Techniques

KW - Psychotherapists

KW - Psychodiagnosis

RP - NOT IN FILE

SP - 330

EP - 337

JF - Professional Psychology

VL - 10

IS - 3

CY - US

PB - American Psychological Association

N2 - Too few mental health professionals have special training in child therapy. Most children referred for psychotherapy must be treated by practitioners whose training has been essentially with adults. In the present article, ethical principles and professional standards that relate to the issue of adult therapists treating children are examined. Selected diagnostic and treatment approaches used with children are described. Differential treatment considerations revolving around the issues of play therapy vs talk therapy, open-ended therapy vs directive therapy, and the role of parental involvement are briefly examined. (9 ref) (PsycINFO Database Record (c) 2012 APA, all rights reserved)

SN - 0033-0175

UR - <http://search.ebscohost.com/login.aspx?direct=true&db=psyh&AN=1980-32900-001&site=ehost-live>

L3 - 10.1037/0735-7028.10.3.330

ER -

TY - JOUR

ID - 1872

T1 - The structural characteristics of monologues in the speech of normal children: Syntactic nonconversational aspects

A1 - Craig, Holly K.

A1 - Gallagher, Tanya M.

Y1 - 1979/03//

KW - PsycInfo

KW - Unsupervised Play Addition

KW - language developmental stage

KW - syntactic characteristics & mean length & sequencing patterns of nonconversational monolog vs dialog utterances  
KW - 2-3 yr old children  
KW - Age Differences  
KW - Language Development  
KW - Speech Characteristics  
KW - Syntax  
KW - Verbal Communication  
KW - Response Duration  
RP - NOT IN FILE  
SP - 46  
EP - 62  
JF - Journal of Speech & Hearing Research  
VL - 22  
IS - 1  
CY - US  
PB - American Speech-Language-Hearing Assn  
N2 - The monolog-dialog language samples collected by T. Gallagher and H. Craig (see record 1979-08115-001) from 9 normal children, 3 at each of R. Brown's (1973) language Stages 1, 2, and 3, were analyzed syntactically. The original procedure consisted of the collection of a 2-hr language sample from each child containing alternations of dialog with the examiner and monolog produced during independent play. Results indicate that the syntactic categories that occurred in monolog speech were similar to those appearing in dialog speech, but the percentage frequencies differed. Monolog subsamples can be characterized syntactically as highly structured sequences of revision behavior reflecting a basic metalinguistic performative. (19 ref) (PsycINFO Database Record (c) 2012 APA, all rights reserved)  
SN - 0022-4685  
UR - <http://search.ebscohost.com/login.aspx?direct=true&db=psyh&AN=1980-25276-001&site=ehost-live>  
ER -  
  
TY - JOUR  
ID - 1873  
T1 - Sequential analysis: Another approach to describing the stream of behaviour in children's interactions  
A1 - Murray, John P.  
A1 - Hayes, Alan J.  
A1 - Smith, Jacqui E.  
Y1 - 1978/12//  
KW - PsycInfo  
KW - Unsupervised Play Addition  
KW - sequential analysis of peer model influence  
KW - group interactions & aggression & individual differences & social learning effects  
KW - male vs female 4-4.5 yr olds  
KW - Childhood Play Behavior  
KW - Group Dynamics  
KW - Interpersonal Interaction  
KW - Peer Relations  
KW - Social Learning  
KW - Aggressive Behavior  
KW - Analysis  
KW - Human Sex Differences  
KW - Individual Differences  
RP - NOT IN FILE  
SP - 207  
EP - 215  
JF - Australian Journal of Psychology  
VL - 30  
IS - 3



CY - United Kingdom

PB - Taylor & Francis

N2 - A modification of B. M. Caldwell's (1969) APPROACH coding scheme was used to analyze sequentially the influence of peer models in group interactions. 20 4-4 «yr old preschool children from upper-middle to lower-upper income levels were equally assigned to 4 mixed-sex groups. Following exposure to active and arousing televised material, videotaped records of 10 min free play were obtained unobtrusively. For 2 of the groups a female adult was present for the 1st half of the play period, while for the others the adult entered after 5 min had elapsed. Analysis revealed intergroup and individual differences in the frequency of aggressive, prosocial, and neutral behaviors, with aggression the most frequently occurring class of behavior. The level of aggressive interaction increased in the 2nd half of the play period, and while the boys' aggressive behavior appeared independent of the presence or absence of the adult, the girls were significantly more aggressive when the adult was absent. Simultaneous and time-lagged correlation analyses explicated the sequential influence of each individual upon the group, and 4 styles of interaction were identified: actors, leaders, followers, and individualists. It is proposed that actors and leaders are most likely to exert a prime modeling influence on the observing followers, with the individualist being the least susceptible to social learning effects in the peer group. (17 ref) (PsycINFO Database Record (c) 2012 APA, all rights reserved)

SN - 1742-9536

UR - <http://search.ebscohost.com/login.aspx?direct=true&db=psyh&AN=1980-11798-001&site=ehost-live>

L3 - 10.1080/00049537808256373

ER -

TY - JOUR

ID - 1876

T1 - Structural characteristics of monologues in the speech of normal children: Semantic and conversational aspects

A1 - Gallagher, Tanya M.

A1 - Craig, Holly A.

Y1 - 1978/03//

KW - PsycInfo

KW - Unsupervised Play Addition

KW - stage of language development

KW - semantic & conversational aspects of monologues

KW - preschool age children

KW - Conversation

KW - Developmental Stages

KW - Language Development

KW - Semantics

KW - Speech Characteristics

RP - NOT IN FILE

SP - 103

EP - 117

JF - Journal of Speech & Hearing Research

VL - 21

IS - 1

CY - US

PB - American Speech-Language-Hearing Assn

N2 - Investigated semantic and conversational aspects of monologues in the speech of normal children. Ss were 9 children, 3 each at R. Brown's Language Stages 1, 2, and 3 (mean ages 26, 26, and 35 mo, respectively). A 2-hr language sample, containing alternations of dialogue with the examiner and monologue produced during independent play, was collected from each S. Results indicate that the semantic and conversational categories that occurred in monologue speech were similar to those that appeared in contextually matched dialogue speech but the proportional frequencies differed. Monologue subsamples were generally short in length and had a sequencing pattern that was highly consistent and semantically organized. Results are discussed in terms of Piagetian cognitive theory and pragmatic language models. (22 ref) (PsycINFO Database Record (c) 2012 APA, all rights reserved)

SN - 0022-4685

UR - <http://search.ebscohost.com/login.aspx?direct=true&db=psyh&AN=1979-08115-001&site=ehost-live>  
ER -

TY - JOUR

ID - 1878

T1 - Some characteristics of intonation in infants' single-word utterances

A1 - Kishi,Manabu

Y1 - 1978/01//

KW - PsycInfo

KW - Unsupervised Play Addition

KW - intonation characteristics in single-word utterances

KW - Infants

KW - Infant Vocalization

KW - Speech Characteristics

KW - Words (Phonetic Units)

RP - NOT IN FILE

SP - 25

EP - 35

JF - Journal of Child Development

VL - 14

CY - Japan

PB - Japan Society for Research in Child Development

N2 - Two contrasting viewpoints have been presented in the literature as to the relation between single-word utterances and intonation. First, intonation plays some syntactic roles, and single-word utterances can be regarded as "holophrases." Second, intonation is only an imitation of adults' utterances. The present study recorded the single-word utterances and contexts observed with 5 infants, aged 10 mo 6 days to 14 mo 8 days at 1st observation. Intonation pattern was classified into 13 types, and duration, mean variance rate, and frequency range were calculated. Variations of intonation among the repetitional utterances and among the differences of context were compared. Results show agreement in type of intonation among repetitional utterances, but no accord in terms of quantitative aspects. In the utterances that functioned as demand, question, and hail, 71% were "rise" at the end of utterances and 85% were "non-rise." Findings indicate that infants use intonation actively and communicate their intentions with it. (PsycINFO Database Record (c) 2012 APA, all rights reserved)

SN - 0449-2293

UR - <http://search.ebscohost.com/login.aspx?direct=true&db=psyh&AN=1979-28270-001&site=ehost-live>

ER -

TY - JOUR

ID - 1879

T1 - The relation of classroom structure to social behavior, imaginative play, and self-regulation of economically disadvantaged children

A1 - Huston-Stein,Aletha

A1 - Friedrich-Cofer,Lynette

A1 - Susman,Elizabeth J.

Y1 - 1977/09//

KW - PsycInfo

KW - Unsupervised Play Addition

KW - classroom structure

KW - social behavior & imaginative play & self-regulation

KW - economically disadvantaged 2-5 yr olds in urban Head Start classes

KW - Childhood Play Behavior

KW - Classroom Environment

KW - Disadvantaged

KW - Imagination

KW - Project Head Start

KW - Classroom Behavior

KW - Self Regulation

RP - NOT IN FILE

SP - 908

EP - 916

JF - Child Development

JA - Child Dev.

VL - 48

IS - 3

CY - United Kingdom

PB - Blackwell Publishing

N2 - Defined structure as the amount of adult-directed activity in preschool classes and examined the relation of structure to naturally occurring behavior in 13 urban Head Start classes containing 141 2-5 yr olds. Ss in high structure classes engaged in less prosocial behavior to peers, less imaginative play, and less aggression than Ss in low structure classes but had slightly more friendly peer interactions. Ss in high structure classes were more attentive in circle time and helped to clean up more after free play, but they did not show more independent task persistence. The latter finding suggests that high levels of adult direction produce conformity when adults are present but do not facilitate independent task-oriented behavior. (PsycINFO Database Record (c) 2012 APA, all rights reserved)

SN - 1467-8624

UR - <http://search.ebscohost.com/login.aspx?direct=true&db=psyh&AN=1978-21888-001&site=ehost-live>

L3 - 10.2307/1128340

ER -

TY - JOUR

ID - 1880

T1 - The exploratory nature of children's social relations

A1 - Haskett,G.J.

Y1 - 1977/04//

KW - PsycInfo

KW - Unsupervised Play Addition

KW - novel toy presentation

KW - social behavior toward adult toy giver & relation to exploratory behavior

KW - 34-61 mo olds

KW - Childhood Play Behavior

KW - Exploratory Behavior

KW - Social Interaction

KW - Stimulus Novelty

KW - Toys

RP - NOT IN FILE

SP - 101

EP - 113

JF - Merrill-Palmer Quarterly: Journal of Developmental Psychology

VL - 23

IS - 2

CY - US

PB - Wayne State University Press

N2 - Baseline measures of 4 types of social behavior were obtained by observing a child playing with familiar toys in the presence of 2 adults. The 8 Ss ranged in age from 34 to 61 mo. After 10 min of play with familiar toys, the S was presented with a novel toy by one of the adults. Social behaviors toward that adult were significantly increased. Discussion of the findings centers on the similarity of social and exploratory behavior. (21 ref) (PsycINFO Database Record (c) 2012 APA, all rights reserved)

SN - 1535-0266

UR - <http://search.ebscohost.com/login.aspx?direct=true&db=psyh&AN=1978-09717-001&site=ehost-live>

ER -

TY - THES

ID - 1881

T1 - The role of different environmental conditions on leisure time activity of the severely developmentally disabled

A1 - Wehman, Paul H.

Y1 - 1977/03//

N1 - Accession Number: 1978-21328-001. First Author & Affiliation: Wehman, Paul H.; U Wisconsin, Madison. Other Journal Titles: Dissertation Abstracts International: Section B: The Sciences and Engineering. Release Date: 19780701. Publication Type: Dissertation Abstract, (0400); . Media Covered: Electronic. Document Type: Dissertation. Language: English. Major Descriptor: Childhood Play Behavior; Experimental Instructions; Imitation (Learning); Toys. Minor Descriptor: Intellectual Development Disorder. Classification: Mental Retardation (3256) . Population: Human (10); . Page Count: 2

KW - PsycInfo

KW - Unsupervised Play Addition

KW - toy proximity vs modeling vs instructions plus modeling

KW - independent play

KW - severely developmentally disabled

KW - Severe Mental Retardation

KW - Childhood Play Behavior

KW - Experimental Instructions

KW - Imitation (Learning)

KW - Toys

KW - Intellectual Development Disorder

RP - NOT IN FILE

SP - 5751

EP - 5752

JF - Dissertation Abstracts International

VL - 37

IS - 9-A

CY - US

PB - ProQuest Information & Learning

SN - 0419-4217

UR - <http://search.ebscohost.com/login.aspx?direct=true&db=psych&AN=1978-21328-001&site=ehost-live>

ER -

TY - JOUR

ID - 1882

T1 - Can TV stimulate imaginative play?

A1 - Singer, Jerome L.

A1 - Singer, Dorothy G.

Y1 - 1976///

KW - PsycInfo

KW - Unsupervised Play Addition

KW - viewing of "Mister Rogers' Neighborhood" program with vs without adult presence & involvement vs make-believe training with adult using exercises & games

KW - imaginative play

KW - 3-4.5 yr olds in day care center

KW - Child Day Care

KW - Childhood Play Behavior

KW - Curriculum

KW - Imagination

KW - Television Viewing

RP - NOT IN FILE

SP - 74

EP - 80

JF - Journal of Communication

VL - 26

IS - 3

CY - United Kingdom

PB - Blackwell Publishing

N2 - Examined the extent to which the imaginative play of young children is enhanced by adult intervention. 60 3-4.5 yr old Ss from a daycare center were divided into 4 equal-size groups relatively equated by age, sex, IQ, and predisposition to imaginative play. Group A watched selected segments of the Mister Rogers program for 30 min/day for 2 wks. The viewing situation of Group B was similar to that of Group A, except that an adult involved herself with the ongoing program. Group C spent each 30 min session with an adult in a previously prepared sequence of exercises and games and watched no TV. The exercises and games had certain basic concepts in common with the Mister Rogers segments. Group D, the controls, followed the normal nursery school routine, watched no TV, and received no make-believe training. Each S was observed in spontaneous play on 2 occasions 2 wks pre- and 2 wks post-experiment. Significant differences were found between the groups in imaginativeness of play. Group D showed a decrease in imaginative play, while all the other groups showed a modest increase. The linearity of the increase from Group D through Groups A, B, and C was significant. A similar linear increase was found for positive affect. Results suggest that young children are more susceptible to the influence of an adult who can direct and respond to them than to that of a TV program. (PsycINFO Database Record (c) 2012 APA, all rights reserved)

SN - 1460-2466

UR - <http://search.ebscohost.com/login.aspx?direct=true&db=psych&AN=1979-04660-001&site=ehost-live>

L3 - 10.1111/j.1460-2466.1976.tb01907.x

ER -

TY - JOUR

ID - 1883

T1 - Assessing learning effects of an educational toy

A1 - Vagt, Gerhard

A1 - M•ller, Eberhard

Y1 - 1976///

KW - PsycInfo

KW - Unsupervised Play Addition

KW - playing vs not playing with commercial learning toy advertised as promoting perceptual skills

KW - Perceptual Development

KW - 4-6 yr olds at recreational center

KW - Childhood Play Development

KW - Educational Toys

RP - NOT IN FILE

SP - 44

EP - 50

JF - Zeitschrift f•r Entwicklungspsychologie und P.,dagogische Psychologie

VL - 8

IS - 1

CY - Germany

PB - Hogrefe Verlag GmbH &amp; Co. KG

N2 - Assessed the effects on children 4-6 yrs old at a recreational center of playing for 3 wks with a commercial learning toy advertised as promoting perceptual skills. Control Ss participated only in the usual activities of the center. Pre- and posttest scores revealed no significant differences in performance between the groups. It is concluded that learning toys which provide opportunities for play unaccompanied by structured training procedures fail to accelerate perceptual development. (PsycINFO Database Record (c) 2012 APA, all rights reserved)

SN - 0049-8637

UR - <http://search.ebscohost.com/login.aspx?direct=true&db=psych&AN=1978-07707-001&site=ehost-live>

ER -

TY - JOUR

ID - 1884

T1 - Sex differences in antisocial behavior: Does research methodology produce or abolish them?

A1 - Caplan,Paula J.

Y1 - 1975///

KW - PsycInfo

KW - Unsupervised Play Addition

KW - Research Methodology

KW - sex differences in antisocial behavior

KW - Antisocial Behavior

KW - Experimental Methods

KW - Human Sex Differences

RP - NOT IN FILE

SP - 444

EP - 460

JF - Human Development

VL - 18

IS - 6

CY - Switzerland

PB - Karger

N2 - Classifies the literature on sex differences in antisocial behavior into 2 categories: those studies which demonstrate boys to be more antisocial and those which show no difference. It is pointed out that both a failure experience and the presence of an adult during the dependent measure are conducive to the 1st type of outcome, whereas success or no-failure experiences and the absence of an adult are conducive to the 2nd type. These elements of the experiments may play a greater role in producing or abolishing sex-differential behavior than do sex differences in personality that are alleged to be pervasive or even innate; a mechanism for that is explicated. (5 p ref) (PsycINFO Database Record (c) 2012 APA, all rights reserved)

SN - 1423-0054

UR - <http://search.ebscohost.com/login.aspx?direct=true&db=psyh&AN=1976-28930-001&site=ehost-live>

L3 - 10.1159/000271505

ER -

TY - JOUR

ID - 1885

T1 - Parent-child interactions as the therapy target

A1 - Seitz,Sue

A1 - Riedell,Gail

Y1 - 1974/12//

KW - PsycInfo

KW - Unsupervised Play Addition

KW - experimental language therapy program

KW - parent-child interactions

KW - severely retarded Hindu child

KW - Parent Child Relations

KW - Speech Therapy

KW - Intellectual Development Disorder

RP - NOT IN FILE

SP - 295

EP - 304

JF - Journal of Communication Disorders

VL - 7

IS - 4

CY - Netherlands

PB - Elsevier Science

N2 - Presents results of an experimental language therapy program for a severely retarded Hindu child and her parents. The treatment target was the parent-child interactions. Immediate results show changes in the desired direction in these interactions, with some of these changes being documented over 3 mo. Immediate improvement was seen in nonverbal child behaviors such as positively responding to parents and engaging in independent play such that parents viewed the child as more competent and were able to support independent

play and reduce their physical contact and interruptive behavior. Improvement in the child's verbal behavior was reported in follow-ups at 3 mo and again at 1 yr. It is argued that parent-child interactions constitute the child's language environment, and that it is the quality of this environment that will most affect the verbal behavior of the slow developing child. (24 ref) (PsycINFO Database Record (c) 2012 APA, all rights reserved)

SN - 0021-9924

UR - <http://search.ebscohost.com/login.aspx?direct=true&db=psyh&AN=1977-13362-001&site=ehost-live>

L3 - 10.1016/0021-9924(74)90012-4

ER -

TY - JOUR

ID - 1886

T1 - Cross-modal matching by spastic children

A1 - Jones,Bill

A1 - Alexander,Richard

Y1 - 1974/02//

KW - PsycInfo

KW - Unsupervised Play Addition

KW - within- & cross-modal matching of visual & auditory spatiotemporal patterns

KW - perceptual & perceptual-motor deficits

KW - children with spastic quadriplegia

KW - Auditory Perception

KW - Paralysis

KW - Perceptual Disturbances

KW - Perceptual Motor Processes

KW - Visual Perception

RP - NOT IN FILE

SP - 40

EP - 46

JF - Developmental Medicine & Child Neurology

JA - Dev.Med Child Neurol.

VL - 16

IS - 1

CY - US

PB - Mac Keith Press

N2 - Tested the hypothesis that failure of intersensory integration is responsible for various perceptual and perceptual-motor deficits in cerebral palsy patients. In a controlled study, 20 children with spastic quadriplegia were tested for within- and cross-modal matching of visual and auditory spatiotemporal patterns. The spastic group and the matched normal group were equally deficient in all 4 tasks. It is felt that cross-modal matching has only limited applicability in analyzing perceptual deficit in the brain-damaged; inexperience in independent mobility would account for their poor performance. (French & German summaries) (PsycINFO Database Record (c) 2012 APA, all rights reserved)

SN - 1469-8749

UR - <http://search.ebscohost.com/login.aspx?direct=true&db=psyh&AN=1974-32780-001&site=ehost-live>

L3 - 10.1111/j.1469-8749.1974.tb02709.x

ER -

TY - JOUR

ID - 1887

T1 - Familial variables related to the expression of violent aggression in preschool age children

A1 - Abramson,Paul R.

Y1 - 1973/06//

KW - PsycInfo

KW - Unsupervised Play Addition

KW - familial variables

KW - expression of violent aggression

KW - black preschoolers & their mothers

KW - Aggressive Behavior  
KW - Blacks  
KW - Family Structure  
KW - Mother Child Relations  
RP - NOT IN FILE  
SP - 345  
EP - 346  
JF - The Journal of Genetic Psychology: Research and Theory on Human Development  
VL - 122  
IS - 2  
CY - US  
PB - Heldref Publications  
N2 - Explored familial variables related to the expression of violent aggression in 122 black preschool children and their mothers. The family composition variables were assessed by interviews with the mothers, and violent aggression was assessed by children's doll play. Children who expressed violent aggression were significantly more likely to have older male siblings or another adult present in the household than children who did not express violent aggression. There were no significant main effects for Sex, and the Violent Aggression \* Sex interaction effects were nonsignificant. (PsycINFO Database Record (c) 2012 APA, all rights reserved)  
SN - 1940-0896  
UR - <http://search.ebscohost.com/login.aspx?direct=true&db=psyh&AN=1974-00963-001&site=ehost-live>  
ER -

TY - JOUR  
ID - 1889  
T1 - Looking and approach behavior of psychotic and normal children as a function of adult attention or preoccupation  
A1 - Churchill,Don W.  
A1 - Bryson,Carolyn Q.  
Y1 - 1972/03//  
KW - PsycInfo  
KW - Unsupervised Play Addition  
KW - adult attention & preoccupation  
KW - looking & approach behavior  
KW - 3-7 yr.old autistics & early childhood schizophrenics  
KW - Attention  
KW - Autism  
KW - Childhood Schizophrenia  
KW - Interpersonal Interaction  
KW - Approach Behavior  
RP - NOT IN FILE  
SP - 171  
EP - 177  
JF - Comprehensive Psychiatry  
VL - 13  
IS - 2  
CY - Netherlands  
PB - Elsevier Science  
N2 - Studied 14 hospitalized 3-7 yr. olds who had been diagnosed as autistic (5 boys, 3 girls) or early childhood schizophrenic (3 boys, 3 girls). A control group consisted of 14 nonhospitalized Ss matched for age, sex, and socioeconomic status. Each S was observed 3 times/day, 1 day/wk, for 3 consecutive wk. in a room containing a 1-way mirror, a small cubicle seating 1 adult, and 4 zones containing sets of identical toys. An S was left in the room 1st with no adult present, and then with an unfamiliar female who was seated in the cubicle in an attentive and then a preoccupied manner. Measures of approach and attention behavior were recorded. All groups spent the largest amount of time in Zone 2 (where they could see and be seen by the adult), and most Ss looked more at the attentive than the preoccupied adult. Gross differences between psychotic and normal Ss were found in



style of play and interpersonal contact. No support was found for the hypothesis that adult attention drives away autistic or schizophrenic children. (20 ref.) (PsycINFO Database Record (c) 2012 APA, all rights reserved)

SN - 0010-440X

UR - <http://search.ebscohost.com/login.aspx?direct=true&db=psyh&AN=1973-29122-001&site=ehost-live>

L3 - 10.1016/0010-440X(72)90023-5

ER -

TY - JOUR

ID - 1890

T1 - Interpersonal relationships in a gypsy community in the Paris district

A1 - Flavigny,H.

Y1 - 1972/01//

KW - PsycInfo

KW - Unsupervised Play Addition

KW - individual vs.group influences

KW - child rearing & interpersonal relationships

KW - permanent gypsy community

KW - Childrearing Practices

KW - Interpersonal Interaction

KW - Racial and Ethnic Groups

KW - Social Influences

KW - Interpersonal Relationships

RP - NOT IN FILE

SP - 63

EP - 80

JF - Revue de Neuropsychiatrie Infantile et d'Hygiene Mentale de l'Enfance

VL - 20

IS - 1

N2 - Presents an ethnological description of a permanent gypsy community of 691 persons with emphasis on child rearing, by a team of social scientists well known to the community. The young child is treated permissively in all areas including eating and sleeping schedules, sex play, and toilet training. He is also ignored by adults who provide no supervision or specially adapted diet or play area. It is suggested that members of the group do not act as individuals but as group members, probably because of the confusion of ego and superego, resulting in very strong group ties and minimal contact with the outside community. (English, German, & Spanish summaries) (PsycINFO Database Record (c) 2012 APA, all rights reserved)

SN - 0035-1628

UR - <http://search.ebscohost.com/login.aspx?direct=true&db=psyh&AN=1973-10965-001&site=ehost-live>

ER -

TY - JOUR

ID - 1891

T1 - Effects of adult and peer observers on boys' and girls' responses to an aggressive model

A1 - Martin,Marian F.

A1 - Gelfand,Donna M.

A1 - Hartmann,Donald P.

Y1 - 1971/10//

KW - PsycInfo

KW - Unsupervised Play Addition

KW - imitative & total aggressive responding to model depicting aggressive behavior sequence solitary free play vs.play with observer present

KW - 5-7 yr olds

KW - Aggressive Behavior

KW - Imitation (Learning)

KW - Peer Relations

KW - Social Behavior

RP - NOT IN FILE

SP - 1271

EP - 1275

JF - Child Development

JA - Child Dev.

VL - 42

IS - 4

CY - United Kingdom

PB - Blackwell Publishing

N2 - Studied the effects in 100 5-7 yr. olds of individually observing a model depicting a sequence of aggressive behavior. Subsequent ratings of Ss' imitative and total aggressive responding during solitary free play or with an O present indicated that (a) boys displayed more aggressive behavior than girls in all O conditions, (b) peer Os facilitated aggressive responding, and (c) Ss' aggressive responding increased from beginning to end of the free play session when a permissive adult was present. (PsycINFO Database Record (c) 2012 APA, all rights reserved)

SN - 1467-8624

UR - <http://search.ebscohost.com/login.aspx?direct=true&db=psyh&AN=1972-22712-001&site=ehost-live>

L3 - 10.2307/1127810

ER -

TY - JOUR

ID - 1892

T1 - Behavior modification in a profoundly retarded child: A case report

A1 - Miller,Harold R.

A1 - Patton,Mary E.

A1 - Henton,Karel R.

Y1 - 1971/07//

KW - PsycInfo

KW - Unsupervised Play Addition

KW - Behavior Modification

KW - self-feeding & verbal command response & increased standing ability & environmental responsiveness & independent mobility

KW - profoundly retarded 7 yr.old boy

KW - Behavior Therapy

KW - Case Report

KW - Food Intake

KW - Learning

KW - Treatment

KW - Intellectual Development Disorder

RP - NOT IN FILE

SP - 375

EP - 384

JF - Behavior Therapy

VL - 2

IS - 3

CY - US

PB - Association for Advancement of Behavior Therapy

N2 - Describes 3 behavior modification programs used with a profoundly retarded 7-yr-old boy. The programs developed a self-feeding operant, taught S to respond appropriately to a verbal command, and greatly increased his ability to stand without support. Side effects included an apparent increase in S's responsiveness to his environment, and independent mobility by crawling or using a walker. Observational follow-up information indicates that S's behavior gains have been maintained in his home. Questions raised by the training techniques used are considered. (PsycINFO Database Record (c) 2012 APA, all rights reserved)

SN - 0005-7894

UR - <http://search.ebscohost.com/login.aspx?direct=true&db=psyh&AN=1972-23167-001&site=ehost-live>

L3 - 10.1016/S0005-7894(71)80072-2

ER -

TY - JOUR  
ID - 1893  
T1 - Generalization of the control of screaming behavior in an emotionally disturbed, retarded female  
A1 - Reiss,Steven  
A1 - Redd,William H.  
Y1 - 1970///  
KW - PsycInfo  
KW - Unsupervised Play Addition  
KW - control of screaming behavior  
KW - social isolation & positive social reinforcement  
KW - emotionally disturbed retarded female 10 yr.old  
KW - Case Report  
KW - Mental Disorders  
KW - Social Isolation  
KW - Social Reinforcement  
KW - Treatment  
KW - Intellectual Development Disorder  
RP - NOT IN FILE  
SP - 741  
EP - 742  
JF - Proceedings of the Annual Convention of the American Psychological Association  
VL - 5  
IS - Pt. 2  
CY - US  
PB - American Psychological Association  
N2 - Suppressed the screaming behavior of a 10-yr-old emotionally disturbed, retarded female by means of brief social isolation contingent upon screaming and positive social reinforcement for appropriate play behavior. 5 adult females employed these techniques during successive 20-min training sessions. Each of these adults acquired stimulus control of the child's behavior. That is, the child did not scream in the presence of these adults. The number of training sessions required to obtain stimulus control decreased for each successive adult. After 40 training sessions involving 3 adults, stimulus control generalized to unfamiliar adults. (PsycINFO Database Record (c) 2012 APA, all rights reserved)  
UR - <http://search.ebscohost.com/login.aspx?direct=true&db=psych&AN=1970-19050-001&site=ehost-live>  
ER -

TY - JOUR  
ID - 1894  
T1 - Thematic role playing of small children  
A1 - Zemskova,A.  
Y1 - 1969///  
KW - PsycInfo  
KW - Unsupervised Play Addition  
KW - thematic role-playing as stage in child's development  
KW - Childhood Development  
KW - Roles  
RP - NOT IN FILE  
SP - 17  
EP - 20  
JF - Doshkol'Noe Vospitanie  
VL - 42  
IS - 10  
N2 - Presents examples of role-playing as a "new stage in the child's development, as transition to independent play." (PsycINFO Database Record (c) 2012 APA, all rights reserved)  
UR - <http://search.ebscohost.com/login.aspx?direct=true&db=psych&AN=1970-14308-001&site=ehost-live>  
ER -

TY - JOUR

ID - 1895

T1 - Vocalization in infants during the first year of life and its connection with various forms of behavior

A1 - Kononova,I.M.

Y1 - 1968///

KW - PsycInfo

KW - Unsupervised Play Addition

KW - vocalizations during various forms of behavior

KW - 1st yr.of life

KW - Auditory Stimulation

KW - Social Interaction

KW - Stimulation

KW - Verbal Communication

RP - NOT IN FILE

SP - 119

EP - 127

JF - Voprosy Psichologii

VL - 14

IS - 5

CY - Russia

PB - Voprosy Psikhologii

N2 - Vocalization and behavior were recorded in 70 2-12 mo. old infants during all periods of wakefulness. The situations producing vocalizations were interaction with an adult, presence of an adult, interaction with another child, play activity, other motor activities, and no observable causes. Vocalizations were most frequent in social interaction. As the frequency of social interaction with an adult decreased, vocalizations increased on those occasions when the adult was merely physically present. Adding motor activity to social interaction increased vocalization; it decreased, however, when new motor acts were being learned. (23 ref.) (PsycINFO Database Record (c) 2012 APA, all rights reserved)

SN - 0042-8841

UR - <http://search.ebscohost.com/login.aspx?direct=true&db=psych&AN=1969-03744-001&site=ehost-live>

ER -

TY - JOUR

ID - 1896

T1 - LONG-TERM EFFECTS OF MULTIPAROUS AND PRIMIPAROUS MONKEY MOTHER REARING

A1 - Mitchell,G.D.

A1 - Ruppenthal,G.C.

A1 - Raymond,E.J.

Y1 - 1966///

KW - PsycInfo

KW - Unsupervised Play Addition

KW - Behavior

KW - PRIMIPAROUS & MULTIPAROUS MOTHERED OFFSPRING

KW - Animal Social Behavior

KW - Mother Child Relations

KW - Monkeys

RP - NOT IN FILE

SP - 781

EP - 791

JF - Child Development

JA - Child Dev.

VL - 37

IS - 4

CY - United Kingdom

PB - Blackwell Publishing

N2 - 4 ADOLESCENT RHESUS MONKEYS BORN OF PRIMIPAROUS MOTHERS WERE COMPARED WITH 4 ADOLESCENTS OF MULTIPAROUS MOTHERS. THEIR SOCIAL AND NONSOCIAL BEHAVIORS WHEN PAIRED WITH ADULT, AGE-MATE, AND JUVENILE STRANGERS WERE RECORDED. THE PRIMIPAROUS-MOTHERED ADOLESCENTS PLAYED LESS WITH THEIR PARTNERS, DISPLAYED FEWER SPONTANEOUS EMOTIONALITY INDEXES, EXHIBITED LESS SELF-DIRECTED BEHAVIOR, AND WERE MORE DISTURBED IN THE PLAYROOM. THE MULTIPAROUS-MOTHERED MONKEYS WERE OBSERVED TO EXPLORE THEMSELVES ORALLY MORE FREQUENTLY IN THE PRESENCE OF ADULT STRANGERS AND WERE MORE HOSTILE TOWARD THEM. YET, THE PROGENY OF THE EXPERIENCED MOTHERS WERE MUCH MORE RELAXED AND PLAYFUL, PARTICULARLY THE MALES. IT IS CONCLUDED THAT (1) "INDIVIDUAL PECULIARITIES" WITH REGARD TO PLAY PERSIST IN THE PRIMIPAROUS-MOTHERED MALES AT PUBERTY; (2) SUBTLE BUT SIGNIFICANT DIFFERENCES BETWEEN THE GROUPS APPEAR EITHER AS A CONSEQUENCE OF AGE OR OF THE MORE DEMANDING STIMULUS STRANGER SITUATION; AND (3) THE PROGENY OF THE MORE REJECTING MOTHERS (MORE EXPERIENCED MOTHERS) ARE MORE HOSTILE, BUT THIS HOSTILITY IS NEITHER BRUTAL NOR ABNORMAL. (PsycINFO Database Record (c) 2012 APA, all rights reserved)

SN - 1467-8624

UR - <http://search.ebscohost.com/login.aspx?direct=true&db=psyh&AN=1967-02639-001&site=ehost-live>

L3 - 10.2307/1126601

ER -

TY - JOUR

ID - 1897

T1 - Avoidance of feminine toys by kindergarten boys: The effects of adult presence or absence, and an adult's attitudes towards sex-typing

A1 - Kobashigawa,A.

A1 - Arakaki,K.

A1 - Awaguni,A.

Y1 - 1966///

KW - PsycInfo

KW - Unsupervised Play Addition

KW - feminine toys

KW - kindergarten boys

KW - Adult Attitudes

KW - sex typing

KW - Childhood Play Behavior

KW - Sex Roles

KW - Toy Selection

RP - NOT IN FILE

SP - 96

EP - 103

JF - Japanese Journal of Psychology

VL - 37

IS - 2

CY - Japan

PB - Japanese Psychological Assn

N2 - An experiment was conducted to investigate the avoidance of feminine toys by 60 kindergarten boys. 1 group of Ss observed an E who expressed "strict" attitudes toward inappropriately sex-typed behaviors by another child; the 2nd group observed an E who expressed "permissive" attitudes; and the 3rd group observed an E who expressed "neutral" attitudes. Following this, the Ss were observed while playing with feminine and neutral toys in the presence of E, and the remainder in the absence of E. Ss in the adult-present condition showed a stronger avoidance of feminine toys than Ss in the adult-absent condition. The adult's expressed strict attitudes toward sex-typing strengthened the avoidance of the feminine toys in Ss while the permissive attitudes had a disinhibitory effect on inappropriately sex-typed responses. (PsycINFO Database Record (c) 2012 APA, all rights reserved)

SN - 0021-5236

UR - <http://search.ebscohost.com/login.aspx?direct=true&db=psyh&AN=1966-13084-001&site=ehost-live>  
L3 - 10.4992/jjpsy.37.96  
ER -

TY - JOUR

ID - 1898

T1 - Social-class differences in mothers' expectations for children in Indonesia

A1 - Thomas,R.Murray

A1 - Surachmad,Winarno

Y1 - 1962///

KW - PsycInfo

KW - Unsupervised Play Addition

KW - Social Class

KW - & CHILD-REARING IN INDONESIA

KW - CULTURES & COUNTRIES

KW - INDONESIA

KW - CHILD-REARING PRACTICES

KW - SOCIAL CLASS DIFFERENCES IN

KW - Child Rearing

KW - SOCIAL CLASS DIFFERENCES

KW - IN INDONESIA

KW - No terms assigned

RP - NOT IN FILE

SP - 303

EP - 307

JF - The Journal of Social Psychology

VL - 57

IS - 2

CY - US

PB - Heldref Publications

N2 - A comparison of child-raising practices of 100 upper-middle-class with 100 lower-class mothers in Bandung, Indonesia, showed upper-middle mothers expected earlier weaning, reading, and writing. Lower-class mothers expected earlier counting. Differences in expectation for unsupervised play and for a child's feeding himself were not significant. (PsycINFO Database Record (c) 2012 APA, all rights reserved)

SN - 1940-1183

UR - <http://search.ebscohost.com/login.aspx?direct=true&db=psyh&AN=1963-04843-001&site=ehost-live>

L3 - 10.1080/00224545.1962.9710928

ER -

TY - JOUR

ID - 1900

T1 - Aggressive behavior of young children in the absence of an adult

A1 - Siegel,Alberta Engvall

Y1 - 1957///

KW - PsycInfo

KW - Unsupervised Play Addition

KW - Play

KW - SUPERVISION VS.NONSUPERVISION OF

KW - ADULT ABSENCE EFFECT ON

KW - Guilt

KW - IN PLAY WITH ADULT ABSENCE

KW - childhood

KW - ANXIETY IN

KW - & ADULT

KW - ABSENCE

KW - Aggression

KW - ADULT ABSENCE &

KW - BY CHILD

KW - No terms assigned

RP - NOT IN FILE

SP - 371

EP - 378

JF - Child Development

JA - Child Dev.

VL - 28

CY - United Kingdom

PB - Blackwell Publishing

N2 - "The social play of like-sexed pairs of children, in a situation free of adult supervision. was observed in 2 sessions a week apart. The incidence of aggression and of anxiety and guilt in play decreased from session I to session II. This finding is opposed to earlier findings concerning session differences in aggression in doll play. this disparity may be accounted for by the presence or absence of an adult in the play sessions: In the presence of an adult experimenter, young children may abdicate superego functions to him, whereas in the absence of any adult their own internalized standards increasingly restrict expression of unacceptable drives, with a consequent reduction in anxiety and guilt." (PsycINFO Database Record (c) 2012 APA, all rights reserved)

SN - 1467-8624

UR - <http://search.ebscohost.com/login.aspx?direct=true&db=psyh&AN=1959-03446-001&site=ehost-live>

ER -

TY - BOOK

ID - 1901

T1 - Children of today and tomorrow

A1 - Dukes,Ethel

A1 - Hay,Margaret

Y1 - 1949///

N1 - Accession Number: 1950-04517-000. First Author & Affiliation: Dukes, Ethel. Release Date: 19500901. Publication Type: Book, (0200); . Media Covered: Print. Language: English. Major Descriptor: No terms assigned. Classification: Developmental Psychology (2800)

KW - PsycInfo

KW - Unsupervised Play Addition

KW - TEXTBOOKS

KW - Child

KW - CARE

KW - PARENT

KW - -CHILD

KW - RELATIONS

KW - TEXTBOOK

KW - Child Care

KW - CHILDHOOD & ADOLESCENCE

KW - No terms assigned

RP - NOT IN FILE

CY - Oxford England

PB - Macmillan

N2 - An approach to problems of "emotional health" which attempts to correct current excessive emphasis on environmental events (and consequent excessive parent guilt feelings.) "In parenthood and in the teaching profession adults are presented with a child who possesses a certain psychic and physical constitution. It is their task (a) to recognize it; (b) to make the best of it." Summaries of play therapy sessions with various kinds of children are included. These include the "hypersensitive," the "dull," the "gifted," the "power-seeking," the "power-rejecting" child, and others. The concluding section deals with the parent-child relationship. Originally published in Great Britain. 32 references. (PsycINFO Database Record (c) 2012 APA, all rights reserved)

UR - <http://search.ebscohost.com/login.aspx?direct=true&db=psyh&AN=1950-04517-000&site=ehost-live>

ER -

TY - JOUR

ID - 1902

T1 - Freiwillige Schweiger und sprachscheue Kinder

A1 - Spieler,J.

Y1 - 1941///

KW - PsycInfo

KW - Unsupervised Play Addition

KW - Speech

KW - Fear

KW - Child

KW - CHILD (ART

KW - Intelligence

KW - Language

KW - Learning

KW - Play

KW - THOUGHT)

KW - MENTAL TESTS

KW - No terms assigned

RP - NOT IN FILE

SP - 39

EP - 43

JF - Zeitschrift f • r Kinderforschung

VL - 49

N2 - A study of 43 cases of children who, after the development of normal speech, remained in a state of complete or almost complete speechlessness for a prolonged period of time revealed the following: (1) Practically all these children had suffered some sudden and violent nervous or emotional shock which precipitated the attack of speechlessness. Some had been attacked by vicious dogs or other animals; others had suffered severe falls; other, extreme frights or emotional trauma as through the death of a parent. (2) The majority were below par physically. (3) There were more than the usual number of unstable persons in the direct ancestry. Two cases are briefly described by way of illustration. Of these, one talked freely when alone with other children but could not be induced to speak in the presence of adults. The other, as far as could be determined, never spoke at all. The refusal to speak is a means whereby the child symbolically escapes from a social world that has proved too terrifying for him to cope with. (PsycINFO Database Record (c) 2012 APA, all rights reserved)

UR - <http://search.ebscohost.com/login.aspx?direct=true&db=psyh&AN=1942-04610-001&site=ehost-live>

ER -

TY - JOUR

ID - 1903

T1 - A b□n”ss,g gyermeki megit,l,se

A1 - Nagy,M.V.

Y1 - 1939///

KW - PsycInfo

KW - Unsupervised Play Addition

KW - CHILD (ART

KW - Intelligence

KW - Language

KW - Learning

KW - Play

KW - THOUGHT)

KW - MORAL

KW - Judgment

KW - Child

KW - CHILDHOOD AND ADOLESCENCE

KW - No terms assigned

RP - NOT IN FILE



SP - 116

EP - 127

JF - Psychol.Stud.Univ.Bp.

VL - 3

N2 - This is a report of experiments conducted by the author at the Jean Jacques Rousseau Institute in Geneva on 30 school children aged 7-14 years, most of them aged 11-12 years, by the method of Piaget. It was found that the judgment of guilt goes through 3 developmental stages: (1) Moral law is obligatory only in the presence of adults. (2) Irrespective of the situation, the moral act is judged as the violation of a rule. According to the rigidity of this conception the judgment of the child knows no pardon. Identifying himself with the rule, he condemns the sinner. (3) The action is judged according to the motives of the subject; an offense is considered an act against the conscience of the subject and the interests of society. Rigid judgment is replaced by evaluation which leads to the conception of forgiveness. (PsycINFO Database Record (c) 2012 APA, all rights reserved)

UR - <http://search.ebscohost.com/login.aspx?direct=true&db=psych&AN=1941-03202-001&site=ehost-live>

ER -

TY - JOUR

ID - 1904

T1 - Leisure time activities of New York's lower west side

A1 - Robinson,R.

Y1 - 1936///

KW - PsycInfo

KW - Unsupervised Play Addition

KW - LEISURE

KW - CITY CHILD

KW - Child

KW - CITY

KW - SOCIAL FUNCTIONS OF THE INDIVIDUAL

KW - No terms assigned

RP - NOT IN FILE

SP - 484

EP - 493

JF - Journal of Educational Sociology

VL - 9

CY - US

PB - American Sociological Assn

N2 - Diary schedules covering a period of four days in early spring were obtained from 1100 junior high school children (75% foreign parentage). On analysis it was found that the most frequently reported leisure time activities were, in order, listening to radio (chiefly entertainment features), attending motion pictures (84% of which were considered unsuited to children), reading (tabloid newspapers, five-cent magazines, adventure story books) and spending time outdoors (84% unsupervised play on the streets). (PsycINFO Database Record (c) 2012 APA, all rights reserved)

UR - <http://search.ebscohost.com/login.aspx?direct=true&db=psych&AN=1936-04582-001&site=ehost-live>

L3 - 10.2307/2262324

ER -

TY - JOUR

ID - 1905

T1 - P.,dagogen erliegen dem Fluche der L.,cherlichkeit

A1 - Zulliger,H.

Y1 - 1934///

KW - PsycInfo

KW - Unsupervised Play Addition

KW - TEACHER ADJUSTMENT

KW - RIDICULE OF

KW - RIDICULE OF TEACHER

KW - Educational Psychology

KW - No terms assigned

RP - NOT IN FILE

SP - 286

EP - 295

JF - Zeitschrift für Psychoanalytische Pädagogik

VL - 8

N2 - In the humorous productions of all races Jews, politicians, mothers-in-law and teachers play an important part. These individuals are somehow considered dangerous and uncomfortable, and ridicule is a socially acceptable method of expressing condemnation. In part the traditional poverty of teachers is responsible; further, their disinclination to manual work, the manifoldness of their interests, their desire to instruct others and their habit of simplified thinking, the endlessness of their task, the uncertainty of results, and the uselessness of much they teach are contributory factors. Though teachers try to counteract this by participating in political movements, parent-teacher and other associations, and by giving lectures, they remain in a class by themselves. In their presence adults watch their manners and grammar. Disappointment results from the conflict between the desire to consider the teacher superhuman and the knowledge of his shortcomings. Compared to the ideal, reality is "ridiculous." This is aggravated by the teacher's taking the parents' place early in the child's life and the subsequent discovery of his lack of authority. The child finds that he has been afraid of something non-existent, a mere shadow. (PsycINFO Database Record (c) 2012 APA, all rights reserved)

UR - <http://search.ebscohost.com/login.aspx?direct=true&db=psyh&AN=1935-04827-001&site=ehost-live>

ER -

TY - JOUR

ID - 1906

T1 - Die Gestaltungseinheit im Spiel des Grundschulkindes. Eine morphologische Untersuchung auf Grund von Beobachtungen im Schullandheim

A1 - Schultze, W.

Y1 - 1933//

KW - PsycInfo

KW - Unsupervised Play Addition

KW - Play

KW - Child

KW - CHILDHOOD AND ADOLESCENCE

KW - No terms assigned

RP - NOT IN FILE

SP - 1

EP - 68

JF - Archiv für die Gesamte Psychologie

VL - 87

CY - Germany

PB - Bouvier Verlag Herbert Grundmann

N2 - This study deals with play in boys 9-10 years old. It describes their activity with especial reference to the attraction for the boys and closure in themselves of play units. Work and play can be distinguished only as regards the realms in which they occur. Play is found in the realm of sheer joy of life. Playing is either spontaneous activity (sand pile, imitation, play-acting, tag, etc.) or it is to a greater or less extent determined by rules not originating with the players (games both with and without specific toys, competitions, etc.). In both cases, but especially the former, the world or ordinary objects frequently undergoes radical changes to suit the play. A chair is a horse, an automobile, the counter of a fish market or a fortress as occasion demands. In all their play none of the children seemed disposed to aid his fellows-even those on his "side" in a game of war. Most pronounced, however, were the influences exerted upon the players by the occurrence of changes internal to the games themselves. Thus pirates quickly became chauffeurs if the piratical cave pierced through an embankment to become a tunnel. Sometimes an additional player would change a small group into an army. Occasionally two independent play groups would find themselves brought together (e.g. each wishing to use the same spade) and a new game combining them all would emerge. The creative productivity of play is stressed. (PsycINFO Database Record (c) 2012 APA, all rights reserved)

UR - <http://search.ebscohost.com/login.aspx?direct=true&db=psyh&AN=1933-06039-001&site=ehost-live>

ER -

TY - JOUR

ID - 1907

T1 - Leadership among preschool children

A1 - Parten,M.B.

Y1 - 1933/01//

KW - PsycInfo

KW - Unsupervised Play Addition

KW - Sex Differences

KW - Leadership

KW - Preschool Children

KW - Play

KW - Childhood Play Behavior

KW - Early Childhood Development

KW - Human Sex Differences

RP - NOT IN FILE

SP - 430

EP - 440

JF - The Journal of Abnormal and Social Psychology

VL - 27

IS - 4

CY - US

PB - American Psychological Association

N2 - Observations of the spontaneous play of nurseryschool children by the one-minute sampling method showed: that leadership may be consistently recorded by this method; that 60 one-minute samples of behavior furnish reliable measures of leadership when appropriate weights are assigned to the various categories of leadership; and that even at the preschool age there are two definite types of leaders, the "diplomat" and the "bully." The former, by indirect suggestions, controls a large number of children; the latter employs brute force in "bossing" the small group he has chosen for his "gang." Independent play is most characteristic of all ages, but decreases in frequency as the children grow older. Sex differences in leadership are negligible. Leaders somewhat exceed non-leaders in intelligence. There was a trend toward development of leadership as the school year advanced. (PsycINFO Database Record (c) 2012 APA, all rights reserved)

SN - 0096-851X

UR - <http://search.ebscohost.com/login.aspx?direct=true&db=psych&AN=1933-05490-001&site=ehost-live>

L3 - 10.1037/h0073032

ER -

TY - CHAP

ID - 1908

T1 - Social behavior in infancy and childhood

A1 - Anderson,John E.

Y1 - 1932///

N1 - Accession Number: 2008-17075-008. First Author & Affiliation: Anderson, John E.. Release Date: 20081215. Correction Date: 20111010. Publication Type: Book, (0200); Edited Book, (0280); . Media Covered: Print. Document Type: Chapter. Book Type: Classic Book; Textbook/Study Guide. Language: English. Major Descriptor: Childhood Development; Infant Development; Psychosocial Development; Social Behavior; Social Processes. Classification: Psychosocial & Personality Development (2840) . Population: Human (10); . Age Group: Childhood (birth-12 yrs) (100) . Intended Audience: Psychology: Professional & Research (PS) . Page Count: 9

KW - PsycInfo

KW - Unsupervised Play Addition

KW - Social Behavior

KW - infancy

KW - childhood

KW - Social Development

KW - social life

KW - Social Attitudes  
KW - Childhood Development  
KW - Infant Development  
KW - Psychosocial Development  
KW - Social Processes  
RP - NOT IN FILE  
SP - 73  
EP - 81  
T2 - Psychology today: Lectures and study manual  
A2 - Bingham, Walter V.  
CY - Chicago, IL US  
PB - University of Chicago Press  
N2 - (from the chapter) Present-day research on the origins of social behavior not only goes back into the early life of the adult for knowledge of the antecedents of his present behavior, but also studies groups of children as they grow in order to observe the process of social development. The beginnings of social life are found in infancy. Almost from birth onward, the infant is more interested in persons than in things. Between the ages of two and five there is a decrease in the tendency to maintain parallel activities and an increase in co-operative or group play. Independent play decreases with age and that definite social attitudes, such as leadership, become more marked. Older children prefer to be in larger and larger groups of their fellows. From these examples of modern researches which are establishing the principles underlying the orderly development of social behavior, we may move on to the factors affecting its development. (PsycINFO Database Record (c) 2012 APA, all rights reserved) (chapter)  
UR - <http://search.ebscohost.com/login.aspx?direct=true&db=psyh&AN=2008-17075-008&site=ehost-live>  
L3 - 10.1037/13342-008  
ER -

TY - BOOK  
ID - 1909  
T1 - Anger in young children  
A1 - Goodenough, F.L.  
Y1 - 1931///  
N1 - Accession Number: 1932-01577-000. First Author & Affiliation: Goodenough, F. L.. Release Date: 19320401. Publication Type: Book, (0200); . Media Covered: Print. Language: English. Major Descriptor: No terms assigned. Classification: Developmental Psychology (2800)  
KW - PsycInfo  
KW - Unsupervised Play Addition  
KW - Child  
KW - Anger  
KW - CHILDHOOD AND ADOLESCENCE  
KW - No terms assigned  
RP - NOT IN FILE  
CY - Oxford England  
PB - Univ. of Minnesota  
N2 - The report of an investigation, the aim of which was to study the frequency, duration, causes and methods of handling anger outbursts in children in the home. There is a brief review of the literature and an orientation of the present study in the literature. The author's tables show that the frequency of outbursts reaches its peak during the second year; after the second year the outbursts are more frequent and violent for the boys than for the girls. The duration of the outbursts varies but slightly during the first eight years, though the outbursts seem to take on subtle aspects as the age increases. Intrinsic factors showing a distinct relationship to frequency of outbursts are: "child's state of health, length of time since last meal; and possibly fatigue"; extrinsic factors are size and composition of family group, and the presence of adult or child visitors in the home. There is a marked diurnal variation in the frequency with which anger is shown. The longest outbursts occur when the child is in bed, having his bath, or going to bed; the most frequent, during solitary play or play with playmates, or when the child is in bed. Among the two infants in the study the major sources of anger were conflicts over routine physical habits, problems of social relationship and minor physical discomforts. The relative effectiveness of the different methods of control was determined both statistically and subjectively. The author points out the

importance of consistency in discipline, of preventive as against corrective methods of control, of using the daily schedule only as a tool, of the spirit of tolerance and the feeling of security in the home. A 23-page bibliography. (PsycINFO Database Record (c) 2012 APA, all rights reserved)

UR - <http://search.ebscohost.com/login.aspx?direct=true&db=psyh&AN=1932-01577-000&site=ehost-live>  
ER -

TY - BOOK

ID - 1910

T1 - A study of the unsupervised behavior of a group of institutional children

A1 - Smith,M.

Y1 - 1931///

N1 - Accession Number: 1932-00473-000. First Author & Affiliation: Smith, M.. Release Date: 19320101.

Publication Type: Book, (0200); . Media Covered: Print. Language: English. Major Descriptor: No terms assigned. Classification: Developmental Psychology (2800)

KW - PsycInfo

KW - Unsupervised Play Addition

KW - Child

KW - Behavior

KW - CHILDHOOD AND ADOLESCENCE

KW - No terms assigned

RP - NOT IN FILE

CY - Oxford England

PB - Marshall & Bruce

N2 - 46 children (25 boys and 21 girls) ranging in age from four to nine were the subjects and were studied in the play room of the receiving home in Nashville, Tenn. The written records of observation by several trained observers showed a reliability of .94. 20 five-minute periods of observation were sufficient to show consistency in the behavior of the child. The behavior was classified under 62 categories. Results show a reliable sex difference in attacking and being attacked and in "giving." The older age groups showed a reliable difference in surpassing the younger in pattern play and active social behavior. Reliable relationships were sought between the different activities and between the activities and age, weight and height. (PsycINFO Database Record (c) 2012 APA, all rights reserved)

UR - <http://search.ebscohost.com/login.aspx?direct=true&db=psyh&AN=1932-00473-000&site=ehost-live>

ER -

TY - JOUR

ID - 1911

T1 - The 'negative phase' in relation to the behavior of pubescent girls

A1 - Hurlock,E.B.

A1 - Sender,S.

Y1 - 1930///

KW - PsycInfo

KW - Unsupervised Play Addition

KW - Adolescence

KW - NEGATIVE PHASE

KW - CHILDHOOD AND ADOLESCENCE

KW - No terms assigned

RP - NOT IN FILE

SP - 325

EP - 340

JF - Child Development

JA - Child Dev.

VL - 1

CY - United Kingdom

PB - Blackwell Publishing

N2 - The authors report a study of "negative phase" (a behavior period of two to nine months in length which precedes puberty, according to Charlotte B • hler of Vienna) as it is described in the literature, as it is reported in

a questionnaire sent to teachers, matrons of homes and others, and as it appears in court records of juvenile sex delinquencies. The new data of this study were collected in various sections of the city of New York. The authors advance the following conclusions: (1) "that generally restlessness and instability are concomitants of puberty in girls, but whether this disquietude becomes marked enough to be outstanding depends upon a number of factors, the most important of which are environment and home training. The girls reported showing the behavior characteristic of this phase were from inferior social and economic levels; they lived in poor, congested neighborhoods; were unsupervised in their play and conduct; and suffered from deplorable and undesirable home conditions. . (2) The occurrence of sexual delinquency, it would seem, may be conditioned by a great many factors: insufficient supervision by parents, subnormal intelligence, bad companionship, physical inferiority, debasing surroundings in the home and neighborhood rather than physiological development." The authors lay emphasis upon considering the peculiar personality of the individual which is played upon by emotional appeal as being the fundamental factor in the situation rather than immediate environment or low mental caliber. (PsycINFO Database Record (c) 2012 APA, all rights reserved)

SN - 1467-8624

UR - <http://search.ebscohost.com/login.aspx?direct=true&db=psych&AN=1931-02500-001&site=ehost-live>

L3 - 10.2307/1125785

ER -

TY - CHAP

ID - 1912

T1 - Twelve Months versus Eighteen Months

A1 - Gesell,Arnold

Y1 - 1925///

N1 - Accession Number: 2006-07528-022. First Author & Affiliation: Gesell, Arnold; Yale U, Yale Psycho-Clinic, New Haven, CT, US. Release Date: 20060626. Publication Type: Book, (0200); Authored Book, (0240); . Media Covered: Print. Document Type: Chapter. Book Type: Classic Book. Language: English. Major Descriptor: Age Differences; Childhood Development. Classification: Developmental Psychology (2800) . Population: Human (10); . Age Group: Childhood (birth-12 yrs) (100) Infancy (2-23 mo) (140) . Intended Audience: Psychology: Professional & Research (PS) . Page Count: 5

KW - PsycInfo

KW - Unsupervised Play Addition

KW - Age Differences

KW - twelve month olds

KW - eighteen month olds

KW - Development

KW - Childhood Development

RP - NOT IN FILE

SP - 251

EP - 255

T2 - The mental growth of the pre-school child: A psychological outline of normal development from birth to the sixth year, including a system of developmental diagnosis

CY - New York, NY US

PB - MacMillan Co

N2 - Compared behaviors of twelve- vs eighteen-month-olds on a variety of measures. The examiners observed the children's initial reactions to the laboratory setting, when objects were placed before them, when an object was hidden, and when presented with paper and crayon. Independent play was also observed. (PsycINFO Database Record (c) 2012 APA, all rights reserved)

UR - <http://search.ebscohost.com/login.aspx?direct=true&db=psych&AN=2006-07528-022&site=ehost-live>

L3 - 10.1037/11012-022

ER -

TY - CHAP

ID - 1913

T1 - Eighteen Months versus Two Years

A1 - Gesell,Arnold

Y1 - 1925///

N1 - Accession Number: 2006-07528-023. First Author & Affiliation: Gesell, Arnold; Yale U, Yale Psycho-Clinic, New Haven, CT, US. Release Date: 20060626. Publication Type: Book, (0200); Authored Book, (0240); . Media Covered: Print. Document Type: Chapter. Book Type: Classic Book. Language: English. Major Descriptor: Age Differences; Childhood Development. Classification: Developmental Psychology (2800) . Population: Human (10); . Age Group: Childhood (birth-12 yrs) (100) Infancy (2-23 mo) (140) Preschool Age (2-5 yrs) (160) . Intended Audience: Psychology: Professional & Research (PS) . Page Count: 6

KW - PsycInfo

KW - Unsupervised Play Addition

KW - eighteen month olds

KW - two year olds

KW - Age Differences

KW - Development

KW - Childhood Development

RP - NOT IN FILE

SP - 256

EP - 261

T2 - The mental growth of the pre-school child: A psychological outline of normal development from birth to the sixth year, including a system of developmental diagnosis

CY - New York, NY US

PB - MacMillan Co

N2 - (from the chapter) Compared behaviors of eighteen-month-olds to two-year-olds on a variety of measures. The examiners observed the children's initial reactions to the laboratory setting, reactions to having objects placed before them, interactions with examiner, imitative behavior, reactions to being presented with paper and crayon, and reactions to lights. Independent play and children's reactions to each other were also examined. (PsycINFO Database Record (c) 2012 APA, all rights reserved) (chapter)

UR - <http://search.ebscohost.com/login.aspx?direct=true&db=psyh&AN=2006-07528-023&site=ehost-live>

L3 - 10.1037/11012-023

ER -

TY - CHAP

ID - 1914

T1 - Two Years versus Three Years

A1 - Gesell,Arnold

Y1 - 1925///

N1 - Accession Number: 2006-07528-024. First Author & Affiliation: Gesell, Arnold; Yale U, Yale Psycho-Clinic, New Haven, CT, US. Release Date: 20060626. Publication Type: Book, (0200); Authored Book, (0240); . Media Covered: Print. Document Type: Chapter. Book Type: Classic Book. Language: English. Major Descriptor: Age Differences; Childhood Development. Classification: Developmental Psychology (2800) . Population: Human (10); . Age Group: Childhood (birth-12 yrs) (100) Preschool Age (2-5 yrs) (160) . Intended Audience: Psychology: Professional & Research (PS) . Page Count: 5

KW - PsycInfo

KW - Unsupervised Play Addition

KW - two year olds

KW - three year olds

KW - Age Differences

KW - Development

KW - Childhood Development

RP - NOT IN FILE

SP - 262

EP - 266

T2 - The mental growth of the pre-school child: A psychological outline of normal development from birth to the sixth year, including a system of developmental diagnosis

CY - New York, NY US

PB - MacMillan Co

N2 - (from the chapter) Compared behaviors of two- versus three-year olds on a variety of measures. The examiners observed the children's initial reactions to the laboratory setting, behaviors when objects were placed

before them, performance on a multiple choice and command test, performance on a paper-folding task, drawing, and picture completion. Independent play and children's reactions to each other were also observed. (PsycINFO Database Record (c) 2012 APA, all rights reserved) (chapter)

UR - <http://search.ebscohost.com/login.aspx?direct=true&db=psyh&AN=2006-07528-024&site=ehost-live>

L3 - 10.1037/11012-024

ER -

TY - JOUR

ID - 1916

T1 - Standing for a More Flexible and Functional Future

A1 - Labandz,Stephanie

Y1 - 2013/11//

KW - SportDiscus

KW - Unsupervised Play Addition

KW - \*BOTULINUM toxin

KW - \*PREVENTION

KW - \*SPASTICITY

KW - \*BACLOFEN

KW - \*NERVOUS system

KW - \*SURGERY

KW - \*STANDING position

KW - \*CHILDREN with disabilities

KW - \*REHABILITATION

KW - \*CHILDREN

KW - THERAPEUTIC use

KW - CONTRACTURE (Pathology)

KW - Product Design

KW - AIDS for people with disabilities

KW - CEREBRAL palsied children

RP - NOT IN FILE

SP - 16

EP - 19

JA - Rehab Management: The Interdisciplinary Journal of Rehabilitation

VL - 26

IS - 9

N2 - The article reflects on how combining stander use with adjunct treatments help in reducing the impact of joint contractures on independent mobility in children. Further is discussed how joint contractures occur and its negative impact on motion and function. Topics discussed include selective dorsal rhizotomy, intrathecal baclofen and the role of Botulinum Toxin in preventing contraction of the targeted muscle

SN - 08996237

UR -

<https://login.proxy.bib.uottawa.ca/login?url=http://search.ebscohost.com/login.aspx?direct=true&db=s3h&AN=92994469&site=ehost-live>

ER -

TY - JOUR

ID - 1918

T1 - Building GREAT SKILLS in 2 to 3 Year Olds

A1 - Lawrence,Emma

Y1 - 2013/09//

KW - SportDiscus

KW - Unsupervised Play Addition

KW - \*SWIMMING for children -- Training

KW - \*SWIMMING instruction

KW - \*FLOATING (Swimming)

KW - \*SWIMMING



KW - \*SWIMMING techniques

KW - \*KICKING (Swimming)

KW - SAFETY measures

RP - NOT IN FILE

SP - 45

EP - 47

JA - Swimming in Australia

VL - 30

IS - 1

N2 - The article discusses swimming and water safety teaching for two- to three-year-old children. It notes that by two years of age, children can exhibit independent mobility in deep water with supervision by adults. It relates how children can be taught several types of floating including assisted floating, unassisted streamline floating and back floating. It stresses the importance of physical manipulation when teaching propulsive skills such as kicking and paddling

SN - 14452545

UR -

<https://login.proxy.bib.uottawa.ca/login?url=http://search.ebscohost.com/login.aspx?direct=true&db=s3h&AN=90498531&site=ehost-live>

ER -

TY - JOUR

ID - 1921

T1 - INDEPENDENT MOTION: Exploring advances in pediatric mobility

A1 - Smith,Rick

Y1 - 2009/06//

KW - SportDiscus

KW - Unsupervised Play Addition

KW - \*WHEELCHAIRS

KW - \*CHILDREN -- Health

KW - \*CHILD development

KW - \*PEDIATRICS

KW - DESIGN & construction

KW - POWER tools

RP - NOT IN FILE

SP - 16

EP - 19

JA - Rehab Management: The Interdisciplinary Journal of Rehabilitation

VL - 22

IS - 5

N2 - The article focuses on the modern and power wheelchairs offering greater independence and advantages of mobility in very young clients in the U.S. It examines the benefits of such wheelchairs in the self-confidence, self-help skills, and social and visual perceptual skills development of a particular client. It also explores the safety methods and the possible negative effects of such wheelchairs in the exercise habit of children

SN - 08996237

UR -

<https://login.proxy.bib.uottawa.ca/login?url=http://search.ebscohost.com/login.aspx?direct=true&db=s3h&AN=39878689&site=ehost-live>

ER -

TY - JOUR

ID - 1922

T1 - Predicting mobility gains among children with cerebral palsy after application of botulinum toxin A. / Predizendo ganhos de mobilidade em crianA as com paralisia cerebral apA3s aplicaA □ Aço de toxina botulA-nica A

A1 - Cury,V.C.R.

A1 - Mancini,M.C.

A1 - Fonseca,S.T.  
 A1 - Melo,A.P.P.  
 A1 - Sampaio,R.F.  
 A1 - Tirado,M.G.A.  
 Y1 - 2009/01//  
 KW - SportDiscus  
 KW - Unsupervised Play Addition  
 KW - \*CHILDREN with disabilities  
 KW - \*BOTULINUM toxin  
 KW - \*MOTOR ability in children  
 KW - \*ACTIVITIES of daily living  
 KW - \*GAIT in humans  
 KW - CEREBRAL palsied children  
 KW - ORIENTATION & mobility  
 KW - botulinum toxin type A  
 KW - Cerebral Palsy  
 KW - mobility limitations  
 KW - Motor Skills  
 KW - habilidades motoras  
 KW - limitaA Aæes da mobilidade  
 KW - paralisia cerebral  
 KW - toxina botula-nica tipo A  
 RP - NOT IN FILE  
 SP - 44  
 EP - 51  
 JA - Brazilian Journal of Physical Therapy / Revista Brasileira de Fisioterapia  
 VL - 13  
 IS - 1

N2 - Background: Botulinum toxin A (BTA) is commonly used to treat children with cerebral palsy (CP). However, the variables measured before BTA application and associated with motor function and independent mobility, known as predictors of functional outcomes, have not been well defined. Objective: To identify clinical predictors of gains in functional motor skills and independence of mobility among children with CP, three and six months after BTA application. Methods: This was a convenience sample of children with spastic CP (n=35). Measurements of quantitative gains in motor skills and independence of mobility were taken three and six months after BTA application. These outcomes were observed through repeated applications of two functional tests: GMFM (Gross Motor Function Measure) and PEDI (Pediatric Evaluation of Disability Inventory). These tests evaluated gross motor function while sitting or standing and during transitions between these postures, and also during dynamic activities such as walking, running and jumping, along with the children's independence in mobility tasks. The independent variables included the children's characteristics such as age, severity, topographic diagnosis, neuromuscular-skeletal parameters (range of motion and spasticity), gait quality and performance in the functional tests before BTA. Results: Four predictive models were developed (RA ý between 0.58 and 0.83; p<0.05) through the use of CART analysis: two at three months and two at six months after BTA application. The results indicated that children with better gait quality, smaller repertoire of functional motor skills, less independence of locomotion and age below four years and six months before BTA presented greater gains in motor skills and independence in mobility. Conclusion: The results identified significant clinical parameters that can predict functional outcomes of BTA applications among children with CP. ABSTRACT FROM AUTHOR

SN - 14133555

UR -

<https://login.proxy.bib.uottawa.ca/login?url=http://search.ebscohost.com/login.aspx?direct=true&db=s3h&AN=36889615&site=ehost-live>

ER -

TY - JOUR

ID - 1923

T1 - STRIKING A BALANCE

A1 - Kirkner,Amy  
A1 - Dworak,Patti  
Y1 - 2009/01//  
KW - SportDiscus  
KW - Unsupervised Play Addition  
KW - \*CHILDREN with disabilities  
KW - \*MEDICAL rehabilitation  
KW - \*EQUIPMENT & supplies  
KW - \*PEOPLE with disabilities  
KW - \*PREVENTION  
KW - \*SKIN  
KW - \*WHEELCHAIRS  
KW - \*REHABILITATION  
KW - ORIENTATION & mobility  
KW - CARE  
KW - BEDSORES  
KW - CARE & hygiene  
RP - NOT IN FILE  
SP - 18  
EP - 21  
JA - Rehab Management: The Interdisciplinary Journal of Rehabilitation  
VL - 22  
IS - 1  
N2 - The article focuses on the mobility systems to be applied in the rehabilitation of pediatric patients with disabilities. It notes that therapist should ensure that pediatric patients have independent mobility at the earliest age possible. It also notes that skin care for patients should be considered to prevent bedsores and irritation. Wheelchairs are also suggested to be effective in ensuring the security of patients. Partnership between therapist and parents of the patients is also discussed  
SN - 08996237  
UR -  
<https://login.proxy.bib.uottawa.ca/login?url=http://search.ebscohost.com/login.aspx?direct=true&db=s3h&AN=36133985&site=ehost-live>  
ER -  
  
TY - JOUR  
ID - 1924  
T1 - Why a Pediatric Mobile Prone Stander?  
A1 - Davis,Dan  
Y1 - 2006//Winter  
KW - SportDiscus  
KW - Unsupervised Play Addition  
KW - \*POSTURE  
KW - \*CHILDREN with disabilities  
KW - \*PEOPLE with disabilities  
KW - \*SUPINE position  
KW - EXCEPTIONAL children  
KW - HELPLESSNESS (Psychology)  
KW - ORIENTATION & mobility  
RP - NOT IN FILE  
SP - 33  
EP - 45  
JA - Palaestra  
VL - 22  
IS - 1

N2 - Focuses on the implementation of several positioning options for children with physical disabilities. Susceptibility of children with special health care needs to learned helplessness; Advantages of independent mobility to children with disabilities; Information on supine support

SN - 87565811

UR -

<https://login.proxy.bib.uottawa.ca/login?url=http://search.ebscohost.com/login.aspx?direct=true&db=s3h&AN=20305063&site=ehost-live>

ER -

TY - JOUR

ID - 1925

T1 - Determinants of functional independence and quality of life in children with spina bifida

A1 - Schoenmakers,M.A.G.C.

A1 - Uiterwaal,C.S.P.M.

A1 - Gulmans,V.A.M.

A1 - Gooskens,R.H.J.M.

A1 - Helders,P.J.M.

Y1 - 2005/09//

KW - SportDiscus

KW - Unsupervised Play Addition

KW - \*SPINA bifida

KW - \*PATIENTS

KW - \*QUALITY of life

KW - \*LIFE skills

KW - \*MUSCLE strength

KW - \*ACTIVITIES of daily living

KW - NEUROMUSCULAR diseases in children

KW - NEURAL tube -- Abnormalities

KW - MYELOMENINGOCELE

RP - NOT IN FILE

SP - 677

EP - 685

JA - Clinical Rehabilitation

VL - 19

IS - 6

N2 - Objective: To investigate determinants of functional independence and study which functional abilities were determinants for 'health-related quality of life' in children with myelomeningocele. Design: Cross-sectional study by means of clinical assessment, 'disability' measurement and questionnaires. Uni- and multivariate logistic regression models were used to investigate factors that were determinants for these outcomes. Results were expressed as odds ratios (OR) and 95% confidence intervals (95% CI). Setting: Outpatient spina bifida clinic at a university hospital. Subjects: One hundred and twenty-two children with myelomeningocele. Mean age 7.9; range 1f\_ "18 years. Main measures: Functional independence as measured by the Pediatric Evaluation of Disability Inventory (PEDI), and quality of life as measured by the Spina Bifida Health Related Quality of Life Questionnaire. Results: Lesion level below L3 (OR 0.4, 95% CI 0.1f\_ "1.0), mental status of IQ f% • 80 (OR 4.2, 95% CI 1.2f\_ "14.9), having no contractures in lower extremities (OR 3.4, 95% CI 1.3f\_ "8.8), and having normal strength of knee extensor muscles (OR 4.1, 95% CI 1.4f\_ "11.5) were most strongly associated with independence in self-care. Mental status (OR 16.1, 95% CI 2.8f\_ "93.9), having no contractures in lower extremities (OR 1.5, 95% CI 1.4f\_ "5.3), and normal strength in knee extensors (OR 11.0, 95% CI 1.3f\_ "97.0) were the most important determinants for independence in mobility. Concerning functional abilities, being independent with regard to mobility was the most important determinant for 'health-related quality of life' (OR 5.3, 95% CI 1.6f\_ "17.4). Conclusions: In children with myelomeningocele, good muscle strength, mental ability and being independent in mobility appeared to be much more important for daily life function and quality of life than other medical indicators of the disorder. ABSTRACT FROM AUTHOR

SN - 02692155

UR -

<https://login.proxy.bib.uottawa.ca/login?url=http://search.ebscohost.com/login.aspx?direct=true&db=s3h&AN=17705802&site=ehost-live>

ER -

TY - JOUR

ID - 1927

T1 - Inter-rater reliability in assigning ICF codes to children with disabilities

A1 - Ogonowski,Julie A.

A1 - Kronk,Rebecca A.

A1 - Rice,Carryn N.

A1 - Feldman,Heidi M.

Y1 - 2004/03/18/

KW - SportDiscus

KW - Unsupervised Play Addition

KW - \*DISABILITIES

KW - \*HEALTH self-care

KW - \*ACTIVITIES of daily living

KW - \*HEALTH behavior

KW - \*HEALTH

RP - NOT IN FILE

SP - 353

EP - 361

JF - Disability &amp; Rehabilitation

JA - Disabil Rehabil

VL - 26

IS - 6

N2 - Purpose : The purpose of this study was to determine if independent raters would arrive at similar decisions about which codes from the Activities and Participation component of the International Classification of Functioning, Disability, and Health (ICF) to assign to children with disabilities based on the results of standard paediatric functional assessment measures. Method : Children ( $n_{f\_S}=f\_S60$ ), 9 months to 17.75 years old, with a range of disabilities were assessed using either the Vineland Adaptive Behavior Scales ( $n_{f\_S}=f\_S20$ ), the Pediatric Evaluation of Disability Inventory (PEDI) ( $n_{f\_S}=f\_S20$ ), or the School Function Assessment (SFA) ( $n_{f\_S}=f\_S20$ ). Two raters independently determined which of 40 codes from the Activities and Participation component of the ICF applied to each child based on items and standard scores from the assessment measure. The Cohen's kappa statistic was used as the measure of inter-rater reliability. Results : The kappa statistic was  $\geq f\_S0.70$ , the criterion for good agreement in this study, for 23/40 codes using the Vineland, 17/40 codes using the PEDI, and 17/40 codes using the SFA. The mean kappa statistic reached  $\geq f\_S0.70$  for the Self care domain, using all three tools. The mean kappa statistic also reached  $\geq f\_S0.70$  for Learning and Applying Knowledge and Mobility using the Vineland. Conclusions : Independent raters reached high rates of agreement when assessment test items were structured developmentally and corresponded to a single ICF code. For domains other than Self care, alternative assessment strategies may be necessary to improve assigning ICF codes to children with disabilities. ABSTRACT FROM AUTHOR

SN - 09638288

UR -

<https://login.proxy.bib.uottawa.ca/login?url=http://search.ebscohost.com/login.aspx?direct=true&db=s3h&AN=12511442&site=ehost-live>

ER -

TY - JOUR

ID - 1928

T1 - Lower Limb Orthotic Management of Duchenne Muscular Dystrophy: A Literature Review

A1 - Stevens,Phillip M.

Y1 - 2006/10//

KW - SportDiscus

KW - Unsupervised Play Addition

KW - \*ORTHOPEDECS  
 KW - \*PEOPLE with disabilities  
 KW - \*LEG  
 KW - \*ORTHOPEDIC apparatus  
 KW - \*MUSCULAR dystrophy  
 KW - \*HORSES -- Paces,gaits,etc.  
 KW - \*BIOMECHANICS  
 KW - \*WALKING  
 KW - \*WHEELCHAIR sports  
 KW - \*FRACTURES  
 KW - \*ADRENOCORTICAL hormones  
 KW - Risk  
 KW - Research  
 KW - Child  
 KW - STANCE  
 KW - REVIEW  
 KW - Biomechanics

RP - NOT IN FILE

SP - 111

EP - 119

JA - Journal of Prosthetics & Orthotics (JPO)

VL - 18

IS - 4

CY - ;

N2 - Although currently incurable, Duchenne muscular dystrophy remains treatable. The characteristic gradual loss of functional muscle and the concurrent developments of progressive contracture are often indications for orthotic interventions. As the disease progresses through the abbreviated life of the young man, he will encounter three functional stages: independent ambulation, assisted ambulation, and wheelchair mobility. Although controversy continues as to the appropriate role of orthoses during each of these stages, some generalities may be gleaned from a review of published literature. Specific patterns of weakness, accommodation, and contracture development characterize the initial stage of independent ambulation. Orthotic intervention is often confined to nighttime splints to slow the development of equinus contracture. As weakness and contracture progress, balance becomes increasingly precarious, and independent ambulation is ultimately precluded. Many authors have suggested that a degree of ambulation may be maintained during this phase by combinations of surgery, knee-ankle-foot orthoses and aggressive rehabilitation. The popularity of such procedures has declined since its peak in the 1970s and 1980s. Appropriate timing, patient selection, and rehabilitation appear to be essential in obtaining optimal outcomes. Weakness and contracture continue to progress until even assisted ambulation is precluded and wheelchair confinement ensues. Some authors have suggested a limited role of orthotic intervention in the form of postoperative positional ankle-foot orthoses to prevent recurrence of deformities. The relevance of corticosteroids, fracture incidence, and cognitive ability are also discussed. [ABSTRACT FROM AUTHOR]

SN - 10408800

UR -

<https://login.proxy.bib.uottawa.ca/login?url=http://search.ebscohost.com/login.aspx?direct=true&db=s3h&AN=SPHS-1037931&site=ehost-live>;<http://articles.sirc.ca/search.cfm?id=S-1037931>;<http://www.lww.com/>

L2 - <http://articles.sirc.ca/search.cfm?id=S-1037931>

ER -

TY - JOUR

ID - 1929

T1 - From the Editor: Look In the Mirror

A1 - Roberts,Rachel

Y1 - 2007/04//

KW - SportDiscus

KW - Unsupervised Play Addition

KW - \*OUTDOOR recreation for children

KW - \*OVERWEIGHT children

KW - \*PHYSICAL fitness for children

KW - \*OBESITY

KW - \*PLAY

KW - \*RECREATION

KW - \*PARKS

KW - EDITORIALS

RP - NOT IN FILE

SP - 10

EP - 10

JA - Parks & Recreation

VL - 42

IS - 4

N2 - The author introduces the issue's focus on childhood health issues, including obesity, and opportunities for park and recreation agencies to respond. Unsupervised play is becoming less common, so adults need to take steps to encourage play. The author urges adults to model active outdoor behavior, to play with children, and to teach kids that outdoor play is fun

SN - 00312215

UR -

<https://login.proxy.bib.uottawa.ca/login?url=http://search.ebscohost.com/login.aspx?direct=true&db=s3h&AN=24715815&site=ehost-live>

ER -

TY - JOUR

ID - 1930

T1 - Making SURFACING a Play Asset

A1 - Schappet,Jean

A1 - Malkusak,Antonio

A1 - Bruya,Lawrence

Y1 - 2003/02//

KW - SportDiscus

KW - Unsupervised Play Addition

KW - \*PLAYGROUNDS

KW - \*PLAY

KW - \*PEOPLE with disabilities

KW - LEGAL status,laws,etc.

KW - United States

RP - NOT IN FILE

SP - 60

JA - Parks & Recreation

VL - 38

IS - 2

N2 - Stresses that an integrated playground will support children's need for independent, self-directed play.

Elements of play; Criteria for pathways that lead to the playground; Categories of surfacing materials;

Significance of the Americans with Disabilities Act in the U.S

SN - 00312215

UR -

<https://login.proxy.bib.uottawa.ca/login?url=http://search.ebscohost.com/login.aspx?direct=true&db=s3h&AN=9207827&site=ehost-live>

ER -

TY - JOUR

ID - 1931

T1 - A gender perspective on adolescents' perceived safety and security when moving outdoors

A1 - Johansson,K.

A1 - Laflamme,L.

A1 - Eliasson,M.

Y1 - 2010/09/02/

KW - SportDiscus

KW - Unsupervised Play Addition

RP - NOT IN FILE

SP - A230

EP - A230

JA - Injury Prevention

VL - 16

N2 - Adolescents in Sweden can move relatively independently in public space. Girls are, however, in general more limited than boys, for instance due to perceived insecurity in the environment. This study explores Swedish girls and boys understandings of threats to their outdoor safety in connection with their everyday independent mobility, and also how they see the potential threat of traffic. Focus group discussions were conducted with 25 boys and 25 girls, 15f\_ "16 years old. Transcripts were analyzed with discourse analysis. To girls, rape was seen as a main threat (and paedophiles to younger children of either sex). Both boys and girls described gangs of aggressive adolescent boys as a major threat, for boys in terms of provocations and violence but for girls gangs were a more ambiguous threat. Traffic was described as unpredictable and fast, often because of irresponsible car drivers. However, many adolescents felt they can compensate for drivers irresponsible behaviour by being careful themselves. In conclusion, sexual and physical violence were seen as major threats and were in general clearly gendered. Traffic, though sometimes threatening, was less prominent, and not described as gendered. To improve safety and security in public space is a matter of gender equity, and needs to take into account both girls higher levels of fear and boys often higher risks of injury. ABSTRACT FROM PUBLISHER

SN - 13538047

UR -

<https://login.proxy.bib.uottawa.ca/login?url=http://search.ebscohost.com/login.aspx?direct=true&db=s3h&AN=66043155&site=ehost-live>

ER -

TY - JOUR

ID - 1932

T1 - Developing fundamental movement skills in outdoor settings : three case studies of children playing

A1 - Taggart,A.

A1 - Keegan,L.

Y1 - 1997///

KW - SportDiscus

KW - Unsupervised Play Addition

KW - \*PLAY

KW - Case Studies

KW - Child

KW - MOTOR SKILL

RP - NOT IN FILE

SP - 11

EP - 17

JA - ACHPER Healthy Lifestyles Journal

VL - 44

IS - 4

CY - ;

N2 - Recently research has shown that many children are not developing competence in fundamental movement skills. For example, it has been suggested that Victorian children in Grade 2 have major developmental deficits in throwing, catching, striking and kicking. It is clear that early schooling experiences must provide equitable and outcome producing play experiences for children if they are to develop fundamental movement skills that form that basis of future participation in physical activity. Three comparative case studies examined the opportunities that pre-primary children (5 year-olds) have to engage in fundamental movement skills in an outdoor play settings. Direct observation of individuals and small groups allowed for the analysis of the fundamental movement skills performed by children. Results indicated that many children are not engaging in



the manipulative skills of throwing, catching, hitting and kicking while running, jumping and climbing were the predominant skills performed. Further findings indicate the variability in the practice of fundamental movement skills at the different centres relate to time allocation, teacher/adult presence in the play setting, playground design and equipment usage/availability

SN - 13210394

UR -

<https://login.proxy.bib.uottawa.ca/login?url=http://search.ebscohost.com/login.aspx?direct=true&db=s3h&AN=SPH455193&site=ehost-live;http://articles.sirc.ca/search.cfm?id=455193>

L2 - <http://articles.sirc.ca/search.cfm?id=455193>

ER -

TY - JOUR

ID - 1933

T1 - The impact of play on development: a meta-analysis

A1 - Fisher,E.P.

Y1 - 1992/05//

KW - SportDiscus

KW - Unsupervised Play Addition

KW - \*PLAY

KW - Child Development

KW - REVIEW

KW - Child

RP - NOT IN FILE

SP - 159

EP - 181

JF - Play & Culture

VL - 5

IS - 2

CY - ;

N2 - This paper reviews the results of 46 studies conducted since 1974 on the importance of play to childhood development. A circumscribed area of the literature was inventoried that treats play as the independent variable. A quantitative synthesis of data was achieved using techniques of meta-analysis. Methodological and substantive features were systematically coded, and each study weighted for quality of design. Effect size findings provide convincing evidence of the impact of play, which appears to promote improved performance outcomes in both cognitive-linguistic and affective-social domains. Notable differences were discovered among the effects of different types of play, and especially robust results were obtained for child-oriented sociodrama

SN - 08944253

UR -

<https://login.proxy.bib.uottawa.ca/login?url=http://search.ebscohost.com/login.aspx?direct=true&db=s3h&AN=SPH340580&site=ehost-live;http://articles.sirc.ca/search.cfm?id=340580>

L2 - <http://articles.sirc.ca/search.cfm?id=340580>

ER -

TY - JOUR

ID - 1934

T1 - Children's play as an indicator of cross-cultural and intra-cultural difference

Y1 - 1970//

KW - SportDiscus

KW - Unsupervised Play Addition

KW - \*PLAY

KW - \*GAMES

KW - \*SPORTS

KW - CROSS-cultural studies

KW - Methodology

KW - Research

KW - Japan

KW - United States

KW - Child

KW - SEX FACTOR

RP - NOT IN FILE

CY - ;

N2 - A method of analyzing cross-cultural data on children's play as an index to differential cultural impact was proposed and tested. The hypotheses were: 1) that children's play will show a developmental sequence independent of the culture, and 2) that differences between sexes and between rural-urban groups reflect cross-cultural rather than developmental differences. The hypotheses were supported

UR -

<https://login.proxy.bib.uottawa.ca/login?url=http://search.ebscohost.com/login.aspx?direct=true&db=s3h&AN=SPH20813&site=ehost-live;http://articles.sirc.ca/search.cfm?id=20813>

L2 - <http://articles.sirc.ca/search.cfm?id=20813>

ER -

TY - JOUR

ID - 1935

T1 - Active Kids

A1 - Thompson,Dixie L.

Y1 - 2006/07//

KW - SportDiscus

KW - Unsupervised Play Addition

KW - \*PHYSICAL fitness

KW - \*CARDIOVASCULAR fitness

KW - \*STRESS (Physiology)

KW - \*PLAY

KW - \*OBESITY

KW - \*CHRONIC diseases

KW - TEENAGERS

KW - Child

RP - NOT IN FILE

SP - 4

EP - 4

JA - ACSM's Health & Fitness Journal

VL - 10

IS - 4

CY - ;

N2 - A discussion on how adults can take an active role in fighting the rise in obesity and chronic disease in children and adolescents through physical activity is provided. The following tips for adults are presented: encourage regular physical activity, discourage sedentary behaviours and poor food choices, and become a community advocate

SN - 10915397

UR -

<https://login.proxy.bib.uottawa.ca/login?url=http://search.ebscohost.com/login.aspx?direct=true&db=s3h&AN=SPHS-1027904&site=ehost-live;http://articles.sirc.ca/search.cfm?id=S-1027904;http://www.lww.com>

L2 - <http://articles.sirc.ca/search.cfm?id=S-1027904>

ER -

TY - JOUR

ID - 1936

T1 - Adapting Equipment for Children With Disabilities

Y1 - 1989/01//

KW - SportDiscus

KW - Unsupervised Play Addition

KW - \*DEVELOPMENTAL disabilities

KW - \*PLAY

KW - CEREBRAL palsied children

KW - EXCEPTIONAL children

KW - Toys

RP - NOT IN FILE

SP - 13

EP - 13

JA - Adapted Physical Activity Quarterly

VL - 6

IS - 1

N2 - This article summarizes the research paper "Making toys accessible for children with cerebral palsy," by C. Schaeffler, in "Teaching Exceptional Children." The author lists and describes adaptations of toys that have been found to be most effective in enhancing active independent use of play materials for children with cerebral palsy

SN - 07365829

UR -

<https://login.proxy.bib.uottawa.ca/login?url=http://search.ebscohost.com/login.aspx?direct=true&db=s3h&AN=20724807&site=ehost-live>

ER -

TY - JOUR

ID - 1937

T1 - Improving the independent play of severely mentally retarded children

A1 - Hopper,C.

A1 - Wambold,C.

Y1 - 1981///

KW - SportDiscus

KW - Unsupervised Play Addition

KW - \*PEOPLE with disabilities

KW - \*MENTAL retardation

KW - \*PLAY

KW - \*TEACHING

KW - ABILITY

KW - Child

KW - DISABILITIES-Mental retardation - activities

RP - NOT IN FILE

CY - ;

UR -

<https://login.proxy.bib.uottawa.ca/login?url=http://search.ebscohost.com/login.aspx?direct=true&db=s3h&AN=SPH116432&site=ehost-live;http://articles.sirc.ca/search.cfm?id=116432>

L2 - <http://articles.sirc.ca/search.cfm?id=116432>

ER -

TY - JOUR

ID - 1938

T1 - Continuity and discontinuity in play conditioning: the adult-child connection

A1 - Kelly-Byrne,D.

Y1 - 1984///

KW - SportDiscus

KW - Unsupervised Play Addition

KW - \*PLAY

KW - ADULTHOOD

KW - Interpersonal Relations

KW - COMPARATIVE studies

KW - MARRIAGE

KW - Child

RP - NOT IN FILE

CY - ;

N2 - Examines play as a continuous and a discontinuous behaviour. Presents descriptions of adult play which differ from those commonly held by culture and suggests that they are similar to descriptions of a child's play behaviour amongst friends. Examines similarities in the play of the two age groups. Argues that what might be discontinuity in the culture is not the behaviour we call play but rather the attitudes toward the play of children and adults

UR -

<https://login.proxy.bib.uottawa.ca/login?url=http://search.ebscohost.com/login.aspx?direct=true&db=s3h&AN=SPH143260&site=ehost-live>;<http://articles.sirc.ca/search.cfm?id=143260>

L2 - <http://articles.sirc.ca/search.cfm?id=143260>

ER -

TY - JOUR

ID - 1939

T1 - The Neglected Factor-Play

A1 - Feitelson,D.

A1 - Ross,G.S.

Y1 - 1973//

KW - SportDiscus

KW - Unsupervised Play Addition

KW - \*ACHIEVEMENT

KW - \*PLAY

KW - CREATIVE ability

KW - Culture

KW - ABILITY

KW - Child

RP - NOT IN FILE

SP - 202

EP - 223

JA - International Journal of Child Psychotherapy

VL - 1

IS - 3July

N2 - Investigates whether modelling is an essential prerequisite for the emergence of thematic play and whether there is a link between level of thematic play and performance on conventional creativity tests. Twenty-four Ss were first assessed on level of thematic play and innovative and exploratory behavior. They were then assigned to one of four treatment groups- individual play tutoring, access to play props unaccompanied by tutoring, individual tutoring in music, no intervention. Finally, level of thematic play and performance on creativity tests were assessed again. Results were in the predicted directions

UR -

<https://login.proxy.bib.uottawa.ca/login?url=http://search.ebscohost.com/login.aspx?direct=true&db=s3h&AN=SPH331425&site=ehost-live>;<http://articles.sirc.ca/search.cfm?id=331425>

L2 - <http://articles.sirc.ca/search.cfm?id=331425>

ER -

TY - JOUR

ID - 1942

T1 - Four-part choral synthesis system for investigating intonation in a cappella choral singing

A1 - Howard,David

A1 - Daffern,Helena

A1 - Brereton,Jude

Y1 - 2013/10//

KW - CINAHL

KW - Unsupervised Play Addition

KW - Voice Quality -- Evaluation

KW - Singing -- Evaluation

KW - Computers and Computerization -- Utilization

KW - Singing -- Psychosocial Factors

KW - Human

KW - Funding Source

KW - Larynx -- Physiology

KW - Performing Arts

KW - Speech -- Organizations

KW - Singing -- Classification

KW - Video Games

KW - Radio Frequency Identification

KW - Graphical User Interface

KW - Speech Acoustics

KW - Data Analysis Software

KW - Audiorecording

KW - Female

KW - Young Adult

KW - Students, Undergraduate

KW - Electronic Spreadsheets

RP - NOT IN FILE

SP - 135

EP - 142

JA - Logopedics Phoniatrics Vocology

VL - 38

IS - 3

U2 - PMID: 23855264

N2 - Accurate tuning is an important aspect of singing in harmony in the context of a choir or vocal ensemble. Tuning and 'pitch drift' are concerning factors in performance for even the most accomplished professional choirs when singing a cappella (unaccompanied). In less experienced choirs tuning often lacks precision, typically because individual singers have not developed appropriate listening skills. In order to investigate accuracy of tuning in ensemble singing situations, a chorally appropriate reference is required against which frequency measurements can be made. Since most basic choral singing involves chords in four parts, a four-part reference template is used in which the fundamental frequencies of the notes in each chord can be accurately set. This template can now be used in experiments where three of the reference parts are tuned in any musical temperament (tuning system), in this case equal and just temperaments, and played over headphones to a singer to allow her/his tuning strategy to be investigated. This paper describes a practical implementation of a four-part choral synthesis system in Pure Data (Pd) and its use in an investigation of tuning of notes by individual singers using an exercise originally written to explore pitch drift in a cappella choral singing

SN - 1401-5439

AD - Audio Laboratory, Department of Electronics, University of York, Heslington, York, YO10 5DD, UK

UR - <http://search.ebscohost.com/login.aspx?direct=true&db=cin20&AN=2012309973&site=ehost-live>

ER -

TY - JOUR

ID - 1944

T1 - Independent Mobility is Key to Overall Child Development

A1 - Kuntzler, Patrice

Y1 - 2013/07//

KW - CINAHL

KW - Unsupervised Play Addition

KW - Child, Disabled

KW - Child Development

KW - Assistive Technology Devices -- In Infancy and Childhood

KW - Attitude to Disability

KW - Child

RP - NOT IN FILE

SP - 53

EP - 55

JA - Exceptional Parent

VL - 43

IS - 7

SN - 0046-9157

AD - Vice President, Program Development, Henry Viscardi School, The Viscardi Center in Albertson, NY

UR - <http://search.ebscohost.com/login.aspx?direct=true&db=cin20&AN=2012476392&site=ehost-live>

ER -

TY - JOUR

ID - 1947

T1 - Substance use in young adults with pediatric-onset spinal cord injury

A1 - Hwang,,M

A1 - Chlan,,K,M

A1 - Vogel,,L,C

A1 - Zebracki,,K

Y1 - 2012/07//

KW - CINAHL

KW - Unsupervised Play Addition

KW - Spinal Cord Injuries -- In Infancy and Childhood

KW - Substance Abuse -- Epidemiology -- In Adulthood

KW - Cross Sectional Studies

KW - United States

KW - Interviews

KW - Human

KW - Adult

KW - Child

KW - Structured Questionnaires

KW - Clinical Assessment Tools

KW - Scales

KW - Questionnaires

KW - Chi Square Test

KW - Mann-Whitney U Test

KW - Step-Wise Multiple Regression

KW - Logistic Regression

KW - Descriptive Research

KW - Male

KW - Female

KW - Funding Source

RP - NOT IN FILE

SP - 497

EP - 501

JF - Spinal Cord

VL - 50

IS - 7

U2 - PMID: 22370762

N2 - Study design:Cross-sectional surveyObjectives:To assess the prevalence of substance use in young adults with pediatric-onset spinal cord injury (SCI) and its relationship with demographic factors, and medical and psychosocial outcomes.Setting:Young adults living in the United States who received pediatric SCI care at one of three SCI programs at the Shriners Hospitals for Children.Methods:Individuals aged 21-25 years who had sustained SCI before the age of 19 were interviewed with a structured questionnaire including standardized outcome measures: FIM, Satisfaction with Life Scale (SWLS), Short-Form 12 Health Survey (SF-12), Patient Health Questionnaire-9 (PHQ-9) Depression Scale, and Craig Handicap Assessment and Recording Technique (CHART).Results:Sample included 215 individuals with a mean age at interview of 23.3 (s.d.=0.9) years and mean age at injury of 13.2 (s.d.=4.9) years. In all, 24% had a college degree, 36% were employed and 12% were married. Regular substance use was reported by 28% for tobacco, 55% for alcohol and 11% for marijuana. Tobacco use was associated with depressive symptoms and unemployment; alcohol use was associated with

having a college degree, single status and independent mobility; and marijuana use was associated with not having a college degree. There were no significant associations between substance use and injury-related factors or life satisfaction. Conclusion: Substance use in young adults with pediatric-onset SCI was associated with factors such as education, employment, marital status and depressive symptoms. Clinicians caring for youth with SCI should counsel patients and caregivers regarding the use of substances and potential associations with outcomes in adulthood

SN - 1362-4393

AD - 1] Marquette University, Milwaukee, WI, USA [2] Shriners Hospitals for Children, Chicago, IL, USA  
Shriners Hospitals for Children, Chicago, IL, USA

1] Shriners Hospitals for Children, Chicago, IL, USA [2] Rush Medical College, Chicago, IL, USA

UR - <http://search.ebscohost.com/login.aspx?direct=true&db=cin20&AN=2011600643&site=ehost-live>

ER -

TY - JOUR

ID - 1948

T1 - Rethinking passive transport: Bus fare exemptions and young people's wellbeing

A1 - Jones,A.

A1 - Steinbach,R.

A1 - Roberts,H.

A1 - Goodman,A.

A1 - Green,J.

Y1 - 2012/05//

KW - CINAHL

KW - Unsupervised Play Addition

KW - Motor Vehicles -- Economics

KW - Personal Satisfaction

KW - Transportation -- Economics

KW - Adolescence

KW - Child

KW - Female

KW - Focus Groups

KW - Human

KW - Interviews

KW - England

KW - Male

KW - Public Health

KW - Transportation -- Methods

RP - NOT IN FILE

SP - 605

EP - 612

JF - Health & Place

JA - Health Place

VL - 18

IS - 3

U2 - PMID: 22321902

N2 - Much recent public health research has emphasised the health impacts for young people of 'active travel' modes, typically defined as walking and cycling. Less research has focused on public transport modes. Drawing on qualitative data, we examine the links between bus travel and wellbeing in London, where young people currently have free bus travel. Our findings indicate that bus travel can be both a physically and socially active experience for young people. We suggest a more nuanced understanding of 'active travel' is now needed, alongside greater attention to urban public transport networks as key sites that impact on important determinants of wellbeing such as independent mobility and social inclusion

SN - 1353-8292

AD - Department of Health Services Research & Policy, London School of Hygiene & Tropical Medicine, 15-17 Tavistock Place, London WC1H 9SH, UK

UR - <http://search.ebscohost.com/login.aspx?direct=true&db=cin20&AN=2011510212&site=ehost-live>

ER -

TY - JOUR

ID - 1950

T1 - Use of the Wii Fit system for the treatment of balance problems in the elderly: a feasibility study

A1 - Brown,Riki

A1 - Burstin,Arie

A1 - Sugarman,Heidi

Y1 - 2011/04//

KW - CINAHL

KW - Unsupervised Play Addition

KW - Balance Training,Physical -- In Old Age

KW - Video Games

KW - Accidental Falls -- Epidemiology

KW - Aged,80 and Over

KW - Case Studies

KW - Clinical Assessment Tools

KW - Female

KW - Human

KW - Pilot Studies

KW - Questionnaires

KW - Scales

KW - Stroke -- Complications

KW - Treatment Outcomes

RP - NOT IN FILE

SP - 32

EP - 32

JA - Journal of the Israeli Physical Therapy Society (JIPTS)

VL - 13

IS - 1

N2 - Background: The rate of falls among patients following a stroke is twice the rate seen in an age and gender matched population. In recent years, the use of virtual reality (VR) for the treatment of balance problems in the elderly has become increasingly widespread. This paper is a report of the feasibility and outcome of using a low-cost, commercially available gaming system - Wii Fit - for balance training after stroke. Methods: The patient was an 86 year-old woman five weeks after stroke, who was unable to walk without close supervision, even with a walker, due to poor balance and a tendency to fall. In addition to standard physical therapy, the patient participated in four training sessions with the Wii Fit system; each training session included four different games. The outcome measures were the Berg Balance Scale (BBS), the Functional Reach and Lateral Reach tests, Timed Up & Go test (TUG), computerized posturography, and the Short Feedback Questionnaire (SFQ). The tests were done before the intervention and on the last day of training. The SFQ was done during the third training session. Results: The patient greatly enjoyed the training sessions and felt that she was receiving very 'up-to-date' treatment. She did not experience any discomfort such as nausea or dizziness while using the system. Following combined Wii and standard treatment, the patient demonstrated improved antero-posterior symmetry of stance, and there was a 10 second improvement in her TUG score. When released from hospital, she was able to walk with a walker with minimal supervision. Conclusions: This initial pilot study indicates that the Wii Fit gaming system has the potential to be used in clinical settings in order to improve balance. A full clinical trial is necessary in order to examine this premise

AD - Beit Rivka Geriatric Rehabilitation Center Petach Tikva, Israel

Research Center for the Health Professions, Ono Academic College, Kiryat Ono, Israel

UR - <http://search.ebscohost.com/login.aspx?direct=true&db=cin20&AN=2011037884&site=ehost-live>

ER -

TY - THES

ID - 1951

T1 - Motion-Based Video Games for Stroke Rehabilitation with Reduced Compensatory Motions

A1 - Alankus,Gazihan



Y1 - 2011///

N1 - Accession Number: 2012158634. Language: English. Entry Date: 20130628. Publication Type: doctoral dissertation; research. Special Interest: Physical Therapy

KW - CINAHL

KW - Unsupervised Play Addition

KW - Stroke -- Rehabilitation

KW - Video Games -- Utilization

KW - Evaluation Research

KW - Exercise Positions

KW - Feedback

KW - Home Rehabilitation

KW - Human

KW - Recovery

RP - NOT IN FILE

EP - 238

PB - Washington University in St. Louis

N2 - Stroke is the leading cause of long-term disability among adults in industrialized nations, with 80% of people who survive strokes experiencing motor disabilities. Recovery requires daily exercise with a high number of repetitions, often without therapist supervision. Motion-based video games can help motivate people with stroke to perform the necessary exercises to recover. We explore the design space of video games for stroke rehabilitation using Wii remotes and webcams as input devices, and share the lessons we learned about what makes games therapeutically useful. We demonstrate the feasibility of using games for home-based stroke therapy with a six-week case study. We show that exercise with games can help recovery even 17 years after the stroke, and share the lessons that we learned for game systems to be used at home as a part of outpatient therapy. As a major issue with home-based therapy, we identify that unsupervised exercises lead to compensatory motions that can impede recovery and create new health issues. We reliably detect torso compensation in shoulder exercises using a custom harness, and develop a game that meaningfully uses both exercise and compensation as inputs. We provide in-game feedback that reduces compensation in a number of ways. We evaluate alternative ways for reducing compensation in controlled experiments and show that using techniques from operant conditioning are effective in significantly reducing compensatory behavior compared to existing approaches

SN - 978-1-267-09807-8

AV - UMI Order AAI3489930.

M1 - Ph.D.

UR - <http://search.ebscohost.com/login.aspx?direct=true&db=cin20&AN=2012158634&site=ehost-live>

ER -

TY - JOUR

ID - 1954

T1 - Online risks obstructing safe Internet access for students

A1 - Lazarinis,F.

Y1 - 2010///

KW - CINAHL

KW - Unsupervised Play Addition

KW - Internet

KW - Safety

KW - Students,College -- Greece

KW - Access to Information

KW - Advertising

KW - Bullying

KW - Child Abuse,Sexual

KW - discrimination

KW - Gambling

KW - Greece

KW - Human

KW - Language

KW - Photography  
 KW - Pornography  
 KW - Racism  
 KW - Search Engines  
 KW - Stereotyping  
 KW - Terrorism  
 KW - Theft  
 KW - Video Games  
 KW - Violence  
 RP - NOT IN FILE  
 SP - 157  
 EP - 170  
 JA - Electronic Library  
 VL - 28  
 IS - 1

N2 - Purpose -- The purpose of this paper is to provide an overall insight into the factors which undermine safe internet access for students. Safer internet access for students is an issue raised during recent years as the web becomes increasingly more accessible to children. However, recent research studies and initiatives demonstrated a number of potential online risks for students. To be able to protect children from potentially hazardous content it is first necessary to have a good understanding of the existing online threats. Design/methodology/approach -- Initially, prior works on online safety problems for children are reviewed and a list of online risks is assembled based on the previous studies and on information gathered from web sites dedicated to safer internet access. Then, based on this listing, an access log of unsupervised internet access of high school students is analyzed to understand which of these risks can be identified. Findings -- The review of previous works on the topic of safer internet access produces a list of diverse problems for unsupervised internet access for children. The results of the log files evaluation show that several of the identified online risks existed in the students' visited sites and that the students are able to bypass the applied restrictions to visit their preferred sites. Originality/value -- The list of online risks can be used by researchers, teachers, parents, educational technologists, web designers, school administrators and libraries to obtain a clearer view of the internet safety issues. Further, this list could be used for directing future research projects on the social consequences of internet usage for children

SN - 0264-0473

AD - Lecturer, Technological Educational Institute of Mesolonghi, Mesolonghi, Greece

UR - <http://search.ebscohost.com/login.aspx?direct=true&db=cin20&AN=2010610758&site=ehost-live>

ER -

TY - THES

ID - 1955

T1 - Towards a Framework for Post-Stroke Interactive and Entertaining Rehabilitation with Reactive Objects

A1 - Alamri, Atif

Y1 - 2010//

N1 - Accession Number: 2012250397. Language: English. Entry Date: 20130913. Publication Type: doctoral dissertation; research. Special Interest: Physical Therapy

KW - CINAHL

KW - Unsupervised Play Addition

KW - Rehabilitation -- Methods

KW - Stroke -- Rehabilitation

KW - Disabled

KW - Exercise

KW - Human

KW - Stroke -- Complications

KW - Stroke -- Mortality

KW - Video Games

KW - Virtual Reality

RP - NOT IN FILE

EP - 125

PB - University of Ottawa (Canada)

N2 - A stroke has been considered one of the leading causes of death in the world. Survivors may suffer minor or major disabilities in their cognitive and motor capabilities, and as a result, they are unable to carry out their usual daily life activities. Thus, they go through a rehabilitation process to recover their motor abilities up to a certain extent. Virtual Reality (VR) technologies have been used to provide entertaining environments for stroke patients to relearn basic motor function movements. Haptic technologies incorporated with virtual environments allow patients to feel and touch virtual objects

In this thesis, we present a new framework based on Augmented Reality (AR) technology that can increase the patients involvement in the rehabilitation exercise, and at the same time, measure the patients performance without the direct supervision of a therapist. We called this system SIERRA, for post-Stroke Interactive and Entertaining Rehabilitation with ReActive objects

The framework uses AR technology to provide a natural exercise environment and motivating virtual objects. It adopts the Serious Games concept to provide patients with a more entertaining environment for treatments. We seamlessly superimpose virtual objects into a real environment and patients can interact with them in motivating game scenarios using a tangible object. In the framework, the tangible object is three-dimensionally tracked by using vision analysis algorithms and the movement of the tangible object is mapped on a virtual avatar that can interact with the virtual environment. Since vibrotactile actuators are attached to this tangible object, the patient can experience haptic/tactile feedback as well as audiovisual feedback. The usability study we conducted with stroke patients shows that the serious games with vibrotactile feedback offers advantages both in terms of improving the interest of patients for the game and in dealing with the realism of the games

SN - 978-0-494-87855-2

AV - UMI Order AAINR87855.

M1 - Ph.D.

UR - <http://search.ebscohost.com/login.aspx?direct=true&db=cin20&AN=2012250397&site=ehost-live>

ER -

TY - JOUR

ID - 1956

T1 - Investigation of mobility levels in visually impaired children: a pilot study [Turkish]

A1 - Uysal,S.A.

A1 - Aki,E.

Y1 - 2009/12//

KW - CINAHL

KW - Unsupervised Play Addition

KW - Physical Mobility -- Evaluation

KW - Rehabilitation of Vision Impaired

KW - Child

KW - Female

KW - Human

KW - Male

KW - Pilot Studies

KW - Questionnaires

KW - Task Performance and Analysis

RP - NOT IN FILE

SP - 201

EP - 206

JA - Fizyoterapi Rehabilitasyon

VL - 20

IS - 3

N2 - Purpose: The aim of this pilot study was to investigate the mobility level functions in children with visual impairment. Material and methods: The study included 30 normal vision subjects whose ages were 9.36A ±2.39 years, 30 low vision subjects whose ages were 9.42A ±2.37 years and 30 total blind children whose ages were 9.41A ±2.18 years. Independent Mobility Questionnaire was performed on all the children. Results: When the levels of mobility was compared among the groups, children with normal vision got significantly better test scores than the low vision and total blind groups (p<0.05). Nevertheless, significant differences were not found between low vision and blind children's mobility levels. Conclusion: According to the results of this study, we found that mobility skills were affected by every level of loss of visual function. Visual input and experiences

which will be used during life are especially gained in the first 8-10 years and children in our study group were still in their learning stage. Therefore, inadequate visual sensory inputs could cause mobility problems which could affect their lives. Also the Independent Mobility Questionnaire is a useful evaluation tool for visually impaired children as it can be applied in a short time and includes different mobility activities. As the visually impaired children need help in their activities, the questionnaire was not found to be sensitive enough to evaluate the activities that need help. However, no alternative method exists in the literature, so we believe that the questionnaire is important as it can provide information about visually impaired children's mobility levels  
SN - 1300-8757

AD - Hacettepe University, Faculty of Health Sciences, Department of Physical Therapy and Rehabilitation, Ankara, Turkey

UR - <http://search.ebscohost.com/login.aspx?direct=true&db=cin20&AN=2010610730&site=ehost-live>

ER -

TY - JOUR

ID - 1958

T1 - The effects of the Norsk Funktion-walking orthosis on the walking ability of children with cerebral palsy and severe gait impairment

A1 - Kuenzle,C.

A1 - Brunner,R.

Y1 - 2009/07//

KW - CINAHL

KW - Unsupervised Play Addition

KW - Cerebral Palsy -- Complications

KW - Cerebral Palsy -- Physiopathology

KW - Orthoses

KW - Walking

KW - Adolescence

KW - Balance,Postural

KW - Chi Square Test

KW - Child

KW - Child,Preschool

KW - Clinical Assessment Tools

KW - Data Analysis Software

KW - Female

KW - Funding Source

KW - Male

KW - Nonexperimental Studies

KW - Outcome Assessment

KW - Prospective Studies

KW - Questionnaires

KW - Torso

KW - Two-Way Analysis of Variance

KW - Wilcoxon Rank Sum Test

KW - Human

RP - NOT IN FILE

SP - 138

EP - 144

JA - Journal of Prosthetics & Orthotics (JPO)

VL - 21

IS - 3

N2 - The purpose of this study was 1) to test whether an orthosis, which provides postural stability of the trunk and guides the leg movements during walking (Norsk Funktion-walker orthosis [NFWO]), would enable nonambulant children with cerebral palsy with poor or no leg coordination and with little or no trunk control to walk on their own, 2) to investigate if there is an increase in motor function and activity while using a NFWO, and 3) defining requirements for a successful provision. Ninety-three children (39 girls, 54 boys; mean age 7.6 years; 67 with bilateral spastic, 10 with dyskinetic, 10 with mixed, 6 with ataxic cerebral palsy; Gross Motor

Function classification System level 4: 45, level 5: 48) were provided with a NFWO. The following assessments were carried out immediately before and 3 months after using the NFWO: WeeFIM walking score; independence rating by parents or caregivers; aims or expectations of parents or caregivers; at a mean interval of 265 days after provision: mean daily walking distance (meters). With the NFWO, 78 children (84%) became ambulatory, 10 children (11%) used it exclusively as a dynamic standing frame only, and 5 children (5%) returned the NFWO. The mean daily walking distance was 99 m (2-463 m). The mean WeeFIM walking score of 1.99 (SD 0.83) without the NFWO increased to 4.42 (SD 1.00) with the NFWO indoors and to 3.71 (SD 1.24) ( $p < 0.001$ ) outdoors. Independence rating by parents or caregivers reflected a highly significant increase in independent mobility with the NFWO compared with locomotion without ambulatory aides ( $p < 0.001$ ) and of bilateral hand function ( $p < 0.001$ ). No significant increase in the mobility was found when comparing former mobility aides (wheelchair, tricycle) with the NFWO. The ability to cross obstacles did neither significantly increase with the NFWO. Successful indication for a NFWO depends on 1) the child's motivation to walk and the support of the environment to achieve independent walking mobility through the use of this assistive tool, 2) the ability for selective reciprocal leg movements, and 3) no flexion contractures of hips and knees above 20[degrees] and a foot dorsiflexion of at least neutral-0[degrees]. The NFWO proved to be a useful ambulatory aid in the children with cerebral palsy with severe gait impairment to increase independent mobility

SN - 1040-8800

AD - Department of Rehabilitation and Development, East Swiss Children's Hospital, Claudiusstr. 6, CH-9006 Saint Gallen, Switzerland

UR - <http://search.ebscohost.com/login.aspx?direct=true&db=cin20&AN=2010374210&site=ehost-live>

ER -

TY - JOUR

ID - 1959

T1 - Children's active free play in local neighborhoods: a behavioral mapping study

A1 - Veitch,J.

A1 - Salmon,J.

A1 - Ball,K.

Y1 - 2008/10//

KW - CINAHL

KW - Unsupervised Play Addition

KW - Child Behavior

KW - Motor Activity

KW - Play and Playthings

KW - Residence Characteristics

KW - Child

KW - Environment

KW - Female

KW - Male

KW - Social Class

KW - Human

RP - NOT IN FILE

SP - 870

EP - 879

JF - Health Education Research

JA - Health Educ Res.

VL - 23

IS - 5

U2 - PMID: 18039726

N2 - Many Australian children are more sedentary than they should be, and almost one in five are currently overweight or obese. Some children may face difficulties finding opportunities to be active, having poor access to safe public open spaces or having low independent mobility limiting their access to places to play. This study aimed to examine children's access to places in their neighborhood for active free play and how these vary by age, sex and socioeconomic status (SES). Behavioral maps of the local neighborhood were completed by children (8-12 years) from five primary schools across different areas of Melbourne. Children living in low SES outer-urban neighborhoods had to travel greater distances to access local parks compared with those in inner-

urban mid and high SES areas. One-third (32%) of children reported an independent mobility range of <100 m from home. In conclusion, for some children opportunities to engage in active free play in the local neighborhood may be limited due to lack of parks in close proximity to home and restricted independent mobility. It is important to collaborate with local governments, urban planners and community groups to improve access to neighborhood parks and to promote a sense of neighborhood safety

SN - 0268-1153

AD - Centre for Physical Activity and Nutrition Research, Deakin University, Burwood, Victoria 3125, Australia. jveitch@deakin.edu.au

UR - <http://search.ebscohost.com/login.aspx?direct=true&db=cin20&AN=2010076322&site=ehost-live>

ER -

TY - JOUR

ID - 1960

T1 - Focused attention in toddlers: measurement, stability, and relations to negative emotion and parenting

A1 - Gaertner,B.M.

A1 - Spinrad,T.L.

A1 - Eisenberg,N.

Y1 - 2008/07//

KW - CINAHL

KW - Unsupervised Play Addition

KW - Attention -- In Infancy and Childhood

KW - Emotions

KW - Infant Behavior

KW - Parenting

KW - Adult

KW - Child,Preschool

KW - Descriptive Statistics

KW - Factor Analysis

KW - Female

KW - Funding Source

KW - Infant

KW - Male

KW - Mother-Child Relations

KW - Play and Playthings

KW - Prospective Studies

KW - Questionnaires

KW - Socioeconomic Factors

KW - Human

RP - NOT IN FILE

SP - 339

EP - 363

JA - Infant & Child Development

VL - 17

IS - 4

N2 - This longitudinal study examined individual differences and correlates of focused attention when toddlers were approximately 18 months old (T1; n=256) and a year later (T2; n=230). Toddlers' attention and negative emotionality were reported by mothers and non-parental caregivers and rated globally by observers. Toddlers' focused attention also was observed during two mother-child interactions and an independent play task.

Measures of maternal emotional support and control were obtained via self-report and observation. Some contemporaneous relations among indices of toddlers' attention were obtained, particularly for observed measures. Moreover, all measures of attention demonstrated stability across time. Negative emotionality was negatively related to toddlers' observed attention at both ages, whereas maternal praise had positive concurrent associations. Maternal control was negatively related to observed attention at T2 and also predicted longitudinally, but only for children who initially had low or moderate attention. The findings suggest that individual differences in focused attention evidence stability early in life but can be influenced by adult socialization. Copyright Ac 2008 John Wiley & Sons, Ltd

SN - 1522-7227

AD - School of Social and Family Dynamics, Arizona State University, Tempe, AZ, USA

UR - <http://search.ebscohost.com/login.aspx?direct=true&db=cin20&AN=2010002477&site=ehost-live>

ER -

TY - JOUR

ID - 1962

T1 - Rehabilitation methods for the burn injured individual

A1 - Spires,M.C.

A1 - Kelly,B.M.

A1 - Pangilinan,P.H.,Jr.

Y1 - 2007/11//

KW - CINAHL

KW - Unsupervised Play Addition

KW - Burns -- Rehabilitation

KW - Skin -- Injuries

KW - Amputation -- Utilization

KW - Burns -- Classification

KW - Burns -- Physiopathology

KW - Child,Preschool

KW - Cicatrix -- Prevention and Control

KW - Exercise

KW - Pediatrics

KW - Skin -- Pathology

KW - Trauma Severity Indices

KW - Human

RP - NOT IN FILE

SP - 925

JF - Physical Medicine & Rehabilitation Clinics of North America

JA - Phys Med Rehabil Clin N Am

VL - 18

IS - 4

U2 - PMID: 17967369

N2 - Physiatrists play a critical role in managing the medical and functional consequences of serious burn injuries. Goals of rehabilitation include wound healing, scar prevention, hypertrophic scarring suppression, full range of motion, strengthening, and independent mobility and activities of daily living. This article is an overview of burn rehabilitation principles and patient management. The ultimate rehabilitation goal is independence in all spheres of an individual's life. Achievement of independence depends on the commitment of the injured individual and the entire health care team

Copyright Ac 2007 by Elsevier Inc

SN - 1047-9651

AD - Department of Physical Medicine and Rehabilitation, University of Michigan Health System, 325 E. Eisenhower, Suite 100, Ann Arbor, MI 48108, USA. mcspires@umich.edu

UR - <http://search.ebscohost.com/login.aspx?direct=true&db=cin20&AN=2009920549&site=ehost-live>

ER -

TY - JOUR

ID - 1963

T1 - The clinical decision-making process of prescribing power mobility for a child with cerebral palsy

A1 - Huhn,K.

A1 - Guarrera-Bowlby,P.

A1 - Deutsch,J.E.

Y1 - 2007/09//

KW - CINAHL

KW - Unsupervised Play Addition

KW - Cerebral Palsy

KW - Decision Making,Clinical

KW - Wheelchairs,Powered

KW - Child

KW - Female

KW - Physical Therapy

RP - NOT IN FILE

SP - 254

EP - 260

JF - Pediatric Physical Therapy

JA - PEDIATR

VL - 19

IS - 3

U2 - PMID: 17700355

N2 - PURPOSE:: Powered mobility has been shown to be an effective method for children with disabilities to achieve independent mobility. The purpose of this case report is to describe the physical therapist's clinical decision making related to power mobility for a child with multiple disabilities. CASE DESCRIPTION:: Power wheelchair evaluation for a nine-year-old child was conducted using Furumasu's tasks for wheelchair readiness moving through a doorway, maneuvering through three cones, and driving in a hallway. Ongoing team assessment with family consultation informed clinical decision-making. OUTCOMES:: A mid-wheel-drive chair afforded improved performance on Furumasu's tasks compared with a rear-wheel-drive chair.

SUMMARY:: This case describes the clinician's role in prescribing power wheelchairs to affect the user's functional skills, as well as how, in the absence of evidence, clinical experience and patients' needs can guide clinical decision-making

SN - 0898-5669

AD - Rivers Lab, School of Health Related Professions, University of Medicine and Dentistry of New Jersey, Newark, New Jersey

UR - <http://search.ebscohost.com/login.aspx?direct=true&db=cin20&AN=2009656931&site=ehost-live>

ER -

TY - JOUR

ID - 1965

T1 - Mobility challenges in individuals with a spinal cord injury with increased body weight

A1 - Fitzgerald,S.G.

A1 - Kelleher,A.R.

Y1 - 2007/03//

KW - CINAHL

KW - Unsupervised Play Addition

KW - Obesity

KW - Physical Mobility

KW - Spinal Cord Injuries

KW - Activities of Daily Living

KW - Adolescence

KW - Adult

KW - Body Weight

KW - Child

KW - Disabled

KW - Equipment Design

KW - Functional Status

KW - Health Promotion

KW - Physical Activity

KW - Social Environment

KW - Therapeutic Exercise

KW - Wheelchairs

RP - NOT IN FILE

SP - 54

EP - 63



JF - Topics in Spinal Cord Injury Rehabilitation

JA - Top Spinal Cord Inj Rehabil

VL - 12

IS - 4

N2 - For the individual with a spinal cord injury (SCI), independent mobility is crucial. For the individual with an SCI who is also obese, independent mobility is especially challenging. This article focuses on the issues surrounding mobility and obesity. Using the International Classification of Functioning, Disability and Health as a framework, mobility issues are discussed in terms of the body and functioning, activities and participation, and environmental factors. Although challenging to prescribe, mobility options do exist for the individual who is obese and uses a wheelchair

SN - 1082-0744

AD - Associate Professor, Department of Rehabilitation Science and Technology, University of Pittsburgh

UR - <http://search.ebscohost.com/login.aspx?direct=true&db=cin20&AN=2009539436&site=ehost-live>

ER -

TY - JOUR

ID - 1967

T1 - Independent mobility for children with disabilities

A1 - Fernandes,T.

Y1 - 2006/07//

KW - CINAHL

KW - Unsupervised Play Addition

KW - Assistive Technology Devices -- In Infancy and Childhood

KW - Child Development

KW - Child,Disabled

KW - Wheelchairs -- In Infancy and Childhood

KW - Cerebral Palsy

KW - Child

KW - Equipment Design

KW - Information Resources

KW - Muscular Dystrophy

KW - Philanthropy

KW - Rehabilitation,Pediatric

KW - United Kingdom

KW - Wheelchairs,Powered

RP - NOT IN FILE

SP - 329

JA - International Journal of Therapy & Rehabilitation

VL - 13

IS - 7

N2 - It is essential that children with disabling conditions such as cerebral palsy or muscular dystrophy are helped to be independently mobile from an early age. If not, they can develop 'learned helplessness', where the child will become passive and dependent upon others, and will not grow and develop to his or her potential. Independent mobility can be achieved through the provision of customized vehicles such as wheelchairs or tricycles. The UK charity Whizz-Kidz provides this equipment, which is often not available through the NHS, to help children to 'realize their true potential'. This article aims to describe the different types of mobility equipment available to help children with disabilities to move around and develop their skills, and offers some examples of different products on the market

SN - 1741-1645

UR - <http://search.ebscohost.com/login.aspx?direct=true&db=cin20&AN=2009242596&site=ehost-live>

ER -

TY - JOUR

ID - 1968

T1 - Toward a better understanding of playfulness in adults

A1 - Guitard,P.

A1 - Ferland,F.  
 A1 - Dutil,A%  
 Y1 - 2005///  
 KW - CINAHL  
 KW - Unsupervised Play Addition  
 KW - Attitude to Life -- In Adulthood  
 KW - Play and Playthings -- In Adulthood  
 KW - Adult  
 KW - Audiorecording  
 KW - Constant Comparative Method  
 KW - Creativeness  
 KW - Female  
 KW - Funding Source  
 KW - Grounded Theory  
 KW - Interview Guides  
 KW - Male  
 KW - Middle Age  
 KW - Purposive Sample  
 KW - Semi-Structured Interview  
 KW - Triangulation  
 KW - Wit and Humor  
 KW - Human  
 RP - NOT IN FILE  
 SP - 9  
 EP - 22  
 JA - OTJR: Occupation, Participation & Health  
 VL - 25

IS - 1

N2 - Playfulness is normally associated with children and remains poorly documented in adult-hood. Studies have confirmed that playfulness is present in adulthood but do not provide any information on its specific nature. An enhanced comprehension of playfulness in adulthood is needed to determine its possible use in occupational therapy intervention with an adult clientele. A qualitative study led to a conceptual definition of playfulness in adulthood. Playfulness can be defined as an internal predisposition characterized by creativity, curiosity, pleasure, sense of humor, and spontaneity. This attitude extends to all life situations and modifies how adults perceive, evaluate, and approach situations. Playfulness enables adults to distance themselves from others, from situations, and from conventions to approach situations with an open mind to find original solutions to problems, to confront difficulties, and to accept failure. Therefore, it may be an important tool in occupational therapy to develop and enhance adults' ability to perform occupations

SN - 1539-4492

AD - Occupational Therapy Program, University of Ottawa, Ottawa, Ontario, Canada

UR - <http://search.ebscohost.com/login.aspx?direct=true&db=cin20&AN=2005057515&site=ehost-live>

ER -

TY - JOUR

ID - 1970

T1 - Accidental burials in sand: a potentially fatal summertime hazard

A1 - Zarroug,A.E.

A1 - Stavlo,P.L.

A1 - Kays,G.A.

A1 - Rodeberg,D.A.

A1 - Moir,C.R.

Y1 - 2004/06//

KW - CINAHL

KW - Unsupervised Play Addition

KW - Accidents

KW - Asphyxia -- Etiology

KW - Play and Playthings

KW - Adolescence

KW - Child

KW - Male

RP - NOT IN FILE

SP - 774

EP - 776

JF - Mayo Clinic Proceedings

JA - Mayo Clin Proc

VL - 79

IS - 6

U2 - PMID: 15182092

N2 - Accidental burial in sand is a tragically unrecognized risk associated with a popular childhood recreational activity. We describe 4 boys, aged 10 to 13 years, who were accidentally buried by sand. One boy died after his self-made tunnel in a sandbox collapsed. In a separate incident at a construction site, 1 boy died, and 2 were injured after a 30-foot sandpile collapsed as they ran down the embankment; all 3 were buried by the sand. In both incidents, play was unsupervised, and burial was sudden and complete. The calculated weight of the sand exceeded the expected maximal muscle effort of the chest, leading to traumatic asphyxiation secondary to restrictive compression of the chest. Only 15 accidental burials have been reported in the literature. To our knowledge, this is the first report describing children who died of respiratory asphyxia due to overwhelming thoracic compression after sand burial. Greater awareness by public health and safety officials at beaches, sandboxes, sandpiles, and natural play areas may prevent potentially lethal accidents

SN - 0025-6196

AD - Department of Surgery, Mayo Clinic College of Medicine, Rochester, MN

UR - <http://search.ebscohost.com/login.aspx?direct=true&db=cin20&AN=2004168521&site=ehost-live>

ER -

TY - JOUR

ID - 1971

T1 - Development pilot: a toy robot for physically disabled children

A1 - Prazak,B.

A1 - Kronreif,G.

A1 - Hochgatterer,A.

A1 - FA -rst,M.

Y1 - 2004/06//

KW - CINAHL

KW - Unsupervised Play Addition

KW - Child,Disabled

KW - Robotics

KW - Play and Playthings

KW - Equipment Design

RP - NOT IN FILE

SP - 131

EP - 136

JA - Technology & Disability

VL - 16

IS - 3

N2 - The aim of this project is to explore how children with physical disabilities could use a toy robot system for autonomous playing. Children with physical disabilities have difficulties interacting with the material environment and they have fewer possibilities for autonomous play. This paper reports the developmental process of a robot system and results of the first user trials with this system and the target group. Working with this toy robot system allows children with physical disabilities to independently manipulate the real objects in a play situation. Future development is outlined

SN - 1055-4181

AD - Research Group on Rehabilitation and Inclusion, ARC Seibersdorf research GmbH, Viktor Kaplan Str. 2, A-2700 Wr. Neustadt, Austria

UR - <http://search.ebscohost.com/login.aspx?direct=true&db=cin20&AN=2005077350&site=ehost-live>  
 ER -

TY - JOUR

ID - 1972

T1 - Paintball injuries in children: more than meets the eye

A1 - Listman,D.A.

Y1 - 2004//02/

KW - CINAHL

KW - Unsupervised Play Addition

KW - Eye Injuries -- Etiology -- In Infancy and Childhood

KW - Eye Protective Devices -- Standards

KW - Play and Playthings

KW - Adolescence

KW - Child

KW - Emergency Service

KW - Epidemiological Research

KW - Eye Hemorrhage -- Epidemiology

KW - Eye Hemorrhage -- Etiology

KW - Eye Injuries -- Epidemiology

KW - Eye Injuries -- Prevention and Control

KW - Female

KW - Firearms

KW - Incidence

KW - Male

KW - Retina -- Injuries

KW - Retinal Detachment -- Epidemiology

KW - Retinal Detachment -- Etiology

KW - Human

RP - NOT IN FILE

SP - e15

EP - e18

JA - Pediatrics

VL - 113

IS - 1

U2 - PMID: 14702489

N2 - **OBJECTIVE:** To describe the increasing incidence of ocular injuries in the pediatric population caused by paintballs. The awareness of this trend will help the physician who treats the child to give appropriate care as well as educate physicians, who counsel children, about this growing mechanism of pediatric injuries.

**METHODS:** Previously unpublished data from the US Consumer Product Safety Commission were analyzed to find the frequency of ocular injuries in children. A review of the English-language literature was also conducted to describe trends with regard to age, sex, location at the time of injury, use of eye protection, types of injuries sustained, and long-term visual outcome. **RESULTS:** The incidence of paintball eye injuries treated in emergency departments has risen from an estimated 545 in 1998 to >1200 in 2000. The proportion of these injuries that occurred in the pediatric population may be well over 40%. These injuries are seen predominantly in boys, a growing proportion of whom are playing informally in unsupervised settings and not wearing eye protection. The cases previously reported include large numbers of hyphemas, retinal detachments, cataracts, corneal abrasions, vitreous hemorrhages, and commotio retina. Many of the patients in these cases sustained permanent visual impairment, with 43% having best vision at follow-up of 20/200 or worse. **CONCLUSIONS:** Pediatric eye injuries caused by paintballs are an unrecognized cause of severe injury and permanent visual loss. The advances in eye protection for participants in "war games" have had little if any effect on the youngest population. Children and teens are unlikely to wear eye protection voluntarily when playing at undesignated or unsupervised locations. Changes should be made to restrict availability of these very dangerous but easily acquired guns and ammunition. Practitioners must counsel young people and their caregivers to avoid injuries by wearing appropriate eye protection. Parents should supervise the use of paintball equipment as they would other activities that involve high-speed projectiles

SN - 0031-4005

AD - Department of Pediatrics, St Barnabas Hospital, 4422 Third Ave, Mills 4, Bronx, NY 10457

UR - <http://search.ebscohost.com/login.aspx?direct=true&db=cin20&AN=2005073898&site=ehost-live>

ER -

TY - JOUR

ID - 1974

T1 - Complementary and alternative medicine use in families of children with cerebral palsy

A1 - Hurvitz,E.A.

A1 - Leonard,C.

A1 - Ayyangar,R.

A1 - Nelson,V.S.

Y1 - 2003/06//

KW - CINAHL

KW - Unsupervised Play Addition

KW - Alternative Therapies -- Utilization -- In Infancy and Childhood

KW - Cerebral Palsy -- Therapy

KW - Adolescence

KW - Chi Square Test

KW - Child

KW - Child,Preschool

KW - Data Analysis Software

KW - Data Analysis,Statistical

KW - Descriptive Research

KW - Descriptive Statistics

KW - Female

KW - Hydrotherapy

KW - Infant

KW - Logistic Regression

KW - Male

KW - Massage

KW - Michigan

KW - Odds Ratio

KW - P-Value

KW - Parents -- Psychosocial Factors

KW - Survey Research

KW - T-Tests

KW - Two-Tailed Test

KW - Human

RP - NOT IN FILE

SP - 364

EP - 370

JF - Developmental Medicine & Child Neurology

JA - Dev.Med Child Neurol.

VL - 45

IS - 6

U2 - PMID: 12785436

N2 - In order to assess patterns of usage of complementary and alternative medicine (CAM) in families of children with cerebral palsy (CP), 213 families with a child (0 to 18 years) with CP were recruited at the university medical center in Ann Arbor, MI, USA as part of a descriptive survey. Two hundred and thirty-five surveys were distributed. Mean age of the child was 8 years 6 months (SD 4y : 9mo) and 56% of the sample was male with 35% full-time independent ambulators, while the rest used an assistive device or a wheelchair. Fifty-four percent were in special education classrooms. Families were given a survey on functional status of the child with CP, CAM usage of the child and the parent, factors influencing the decision to use CAM, demographics, and clinical information. Of the families, 56%, used one or more CAM techniques. Massage therapy (25%) and aquatherapy (25%) were the most common. Children of families that used CAM were significantly younger (7y

: 9mo, SD 4y : 7mo) than non-users (9y : 6mo, SD 4y : 6mo: t-test  $p < 0.01$  two-tailed). Children with quadriplegic CP, with spasticity, and those who could not walk independently were more commonly exposed to CAM (Pearson's  $\chi^2$  [P(chi)2]  $p = 0.01$  two-tailed; for mobility, odds ratio [OR] of 2.5 with regression). Mothers with a college degree had a greater tendency to use CAM for their child than those without (P(chi)2  $p = 0.01$  two-tailed). Fathers of children who used CAM were older than fathers of those who did not (37y : 9mo versus 33y : 2mo,  $p = 0.04$  two-tailed). There was no significant difference between groups for mother's age, father's education, income, or for population of home town. Parents who used CAM for themselves were more likely to try CAM for their child (70% versus 47%, OR 2.1), and were much more likely to be pleased with the outcome (71% versus 42%, OR 3.5). Child's age (younger), lack of independent mobility, and parental use of CAM were the most significant predictive factors identified via logistic regression

SN - 0012-1622

AD - Dept of PM&R, CS Mott Hospital F7822, Ann Arbor, MI 48109-0230

UR - <http://search.ebscohost.com/login.aspx?direct=true&db=cin20&AN=2004060024&site=ehost-live>

ER -

TY - JOUR

ID - 1975

T1 - Creating a game for sexuality and aging: the Sexual Dysfunction Trivia Game

A1 - Skinner,K.D.

Y1 - 2000/07//

KW - CINAHL

KW - Unsupervised Play Addition

KW - Games

KW - Sexual Dysfunction, Male -- Education

KW - Sexual Dysfunction, Female -- Education

KW - Nursing Staff, Hospital -- Education

KW - Staff Development -- Methods

KW - Aged

KW - Sexual Dysfunction, Male -- In Old Age

KW - Sexual Dysfunction, Female -- In Old Age

KW - Pilot Studies

RP - NOT IN FILE

SP - 185

EP - 189

JA - Journal of Continuing Education in Nursing

VL - 31

IS - 4

U2 - PMID: 11261164

N2 - Background: Older adults often present with signs and symptoms of sexual dysfunction, and nurses must possess the necessary knowledge to address this issue. Therefore, The Sexual Dysfunction Trivia Game was designed to educate staff nurses about sexual dysfunction and the aging process. Method: A pilot study was conducted. Five staff nurses played The Sexual Dysfunction Trivia Game. Each nurse completed a pretest before playing the game and a posttest after playing the game. Results: After playing the board game, the nurses were more knowledgeable about what the physical examination includes, what the laboratory tests are, and what the treatment options are for sexual dysfunction. Conclusion: Based on the pretest and posttest findings, The Sexual Dysfunction Trivia Game appears to be an effective teaching tool to educate staff nurses about sexual dysfunction in the older adult. However, more studies are needed to measure its effectiveness

SN - 0022-0124

AD - Nurse Practitioner, West Roxbury Veterans Administration Hospital, West Roxbury, MA

UR - <http://search.ebscohost.com/login.aspx?direct=true&db=cin20&AN=2000076802&site=ehost-live>

ER -

TY - JOUR

ID - 1976

T1 - Selective dorsal rhizotomy: efficacy and safety in an investigator-masked randomized clinical trial

A1 - McLaughlin,J.F.

A1 - Bjornson,K.F.  
 A1 - Astley,S.J.  
 A1 - Graubert,C.  
 A1 - Hays,R.M.  
 A1 - Roberts,T.S.  
 A1 - Price,R.  
 A1 - Temkin,N.  
 Y1 - 1998/04//  
 KW - CINAHL  
 KW - Unsupervised Play Addition  
 KW - Rhizotomy -- Methods  
 KW - Cerebral Palsy -- Surgery  
 KW - Physical Therapy  
 KW - Combined Modality Therapy  
 KW - Muscle Spasticity  
 KW - Clinical Assessment Tools  
 KW - Cerebral Palsy -- Therapy  
 KW - Treatment Outcomes  
 KW - Spinal Nerve Roots -- Pathology  
 KW - Funding Source  
 KW - Clinical Trials  
 KW - Single-Blind Studies  
 KW - Questionnaires  
 KW - T-Tests  
 KW - Chi Square Test  
 KW - Fisher's Exact Test  
 KW - Mann-Whitney U Test  
 KW - Two-Tailed Test  
 KW - Child,Preschool  
 KW - Child  
 KW - Adolescence  
 KW - Male  
 KW - Female  
 KW - Human  
 RP - NOT IN FILE  
 SP - 220  
 EP - 232  
 JF - Developmental Medicine & Child Neurology  
 JA - Dev.Med Child Neurol.  
 VL - 40  
 IS - 4  
 U2 - PMID: 9593493  
 N2 - The objective of this single-center investigator-masked randomized clinical trial was to investigate the efficacy and safety of selective dorsal rhizotomy (SDR) in children with spastic diplegia. Forty-three children with spastic diplegia were randomly assigned on an intention-to-treat basis to receive SDR plus physical therapy (PT), or PT alone. Thirty-eight children completed follow-up through 24 months. Twenty-one children received SDR (SDR+PT group) and 17 received PT (PT Only group). SDR was guided with electrophysiological monitoring and performed by one experienced neurosurgeon. All subjects received equivalent PT. Spasticity was quantified with an electromechanical torque measurement device (spasticity measurement system [SMS]). The Gross Motor Function Measure (GMFM) was used to document changes in functional mobility. Primary outcome measures were collected at baseline, 6, 12, and 24 months by evaluators masked to treatment. At 24 months, the SDR+PT group exceeded the PT Only group in mean reduction of spasticity by SMS measurement (-8.2 versus +5.1 newton meters/radian, P=0.02). The SDR+PT group and the PT Only group demonstrated similar improvements in independent mobility on the GMFM (7.0 versus 7.2 total percent score, P=0.94). Outcomes on secondary variables were consistent with primary outcomes. There were no serious adverse events. We conclude that SDR is safe and reduces spasticity in children with spastic diplegia. SDR plus PT and

equivalent PT without SDR result in equal improvements in independent mobility at 24 months. SDR may not be an efficacious treatment for children with mild spastic diplegia

SN - 0012-1622

AD - Children's Hospital and Regional Medical Center, CH-47, PO Box 5371, Seattle, WA 98105-0371. E-mail: jfmcl@u.washington.edu

UR - <http://search.ebscohost.com/login.aspx?direct=true&db=cin20&AN=1999066189&site=ehost-live>

ER -

TY - JOUR

ID - 1977

T1 - Improvements in child pedestrian safety: have they been gained at the expense of other health goals?

A1 - Dixey,R.

Y1 - 1998/03//

KW - CINAHL

KW - Unsupervised Play Addition

KW - Child Safety -- Trends

KW - Health Promotion -- Trends

KW - Parents -- Psychosocial Factors

KW - Funding Source

KW - Survey Research

KW - Questionnaires

KW - Data Analysis,Statistical

KW - Data Analysis Software

KW - Semi-Structured Interview

KW - Transportation -- Trends

KW - Child

KW - Male

KW - Female

KW - Human

RP - NOT IN FILE

SP - 60

EP - 69

JA - Health Education Journal

VL - 57

IS - 1

N2 - Data collected in 1995 and 1996 in seven Leeds primary schools in relatively disadvantaged areas show high rates of accompanied journeys to and from school. Parents responded to the perceived danger to children from traffic and other causes by increasing surveillance of children on journeys and at play. This paper presents the findings of the Leeds study and asks whether gains in terms of reductions in child pedestrian accidents have been at the expense of children's independent mobility and parents' time. Restrictions on children have consequences for their independent mobility and therefore on levels of physical activity, freedom and opportunities for learning

SN - 0017-8969

AD - Faculty of Health and Environment, Leeds Metropolitan University, Calverley Street, Leeds, LS1 3HE

UR - <http://search.ebscohost.com/login.aspx?direct=true&db=cin20&AN=1998053424&site=ehost-live>

ER -

TY - JOUR

ID - 1978

T1 - Using a creative teaching process with adult patients

A1 - Duffy,B.

Y1 - 1997/02//

KW - CINAHL

KW - Unsupervised Play Addition

KW - Patient Education

KW - Teaching Methods



KW - Home Nursing,Professional

KW - Learning -- In Adulthood

KW - Games

KW - Adult

RP - NOT IN FILE

SP - 102

EP - 108

JA - Home Healthcare Nurse

VL - 15

IS - 2

U2 - PMID: 9146150

N2 - Teaching is an integral component of the home care nurse's role in every visit. Even though many teaching materials are at the nurse's disposal, not everyone feels comfortable teaching in the home setting. A simple teaching process specifically geared toward adult learners is presented as well as strategies and games that the home care nurse can use to make the teaching process effective and efficient

SN - 0884-741X

AD - Interim HealthCare, South Daytona, Florida

UR - <http://search.ebscohost.com/login.aspx?direct=true&db=cin20&AN=1997016824&site=ehost-live>

ER -

TY - JOUR

ID - 1979

T1 - Children's Thinking Styles, Play, and Academic Performance

A1 - Holmes,Robyn M.

A1 - Liden,Sharon

A1 - Shin,Lisa

Y1 - 2013///

KW - ERIC

KW - Unsupervised Play Addition

KW - Group Embedded Figures Test

KW - ERIC,Current Index to Journals in Education (CIJE)

KW - Middle Schools

KW - Program Effectiveness

KW - Play

KW - Hawaiians

KW - Aptitude Treatment Interaction

KW - Middle School Students

KW - Filipino Americans

KW - Academic Achievement

KW - Standardized Tests

KW - Correlation

KW - Cognitive Style

KW - Cultural Influences

KW - Preferences

KW - Extracurricular Activities

RP - NOT IN FILE

SP - 219

EP - 238

JF - American Journal of Play

VL - 5

IS - 2

PB - The Strong. One Manhattan Square, Rochester, NY 14607.

N2 - Based on the study of seventy-four middle school children of mostly Filipino and part Hawaiian heritages, this article explores the relationships of children's thinking styles, play preferences, and school performance. Using the Group Embedded Figures Test, the Articulation of the Body Scale, and written responses to three questions, the authors found significant relationships between children's field-independent or field-dependent

thinking styles and play preferences; play preferences and academic performance; thinking styles and academic performance; and thinking styles and cultural setting. They also discovered that children's preferences for sports related, both positively and negatively, to their scores on state-mandated tests for language and math; that children who preferred unstructured play activities tended to achieve academic success; and that cultural values were correlated to thinking style. The authors argue that their study has applied value for educators because it relates children's play preferences to other aspects of their life experiences, which can help school policy makers decide the extracurricular activities and the types of play they should encourage. (Contains 9 figures.)

SN - 1938-0399, 1938-0399

UR - <http://search.proquest.com/docview/1373090682?accountid=14701>

ER -

TY - JOUR

ID - 1980

T1 - Does Pretend Play Matter? Searching for Evidence: Comment on Lillard et al. (2013)

A1 - Bergen,Doris

Y1 - 2013/01//

KW - ERIC

KW - Unsupervised Play Addition

KW - ERIC,Current Index to Journals in Education (CIJE)

KW - Early Childhood Education

KW - Preschool Education

KW - Play

KW - Young Children

KW - Research Methodology

KW - Child Development

KW - Value Judgment

KW - Research Design

RP - NOT IN FILE

SP - 45

EP - 48

JF - Psychological Bulletin

JA - Psychol.Bull.

VL - 139

IS - 1

PB - American Psychological Association. Journals Department, 750 First Street NE, Washington, DC 20002-4242.

N2 - Lillard et al. (2013) have done a thorough review of published pretend play research from the past 50 plus years. However, they did not thoroughly address the reasons why this body of research has such flaws as well as the contradictory or minimal findings that call into question strongly held views and published assertions regarding the importance of the role of pretend play in fostering children's developmental progress. This comment addresses 3 aspects of the problematic nature of play research: First, I suggest that the research methods in most of these studies were unable to capture genuine pretend play, instead measuring "playful work." Second, I encourage rigorous research designs to better capture genuine examples of the pretend play phenomenon in order to gain deeper insights into these relationships. Third, I speculate on why pretend play development, as a valued behavior independent of its influence on other areas of development, is rarely undertaken and provide suggestions regarding this research direction

SN - 0033-2909, 0033-2909

UR - <http://search.proquest.com/docview/1413414963?accountid=14701>

L2 - [http://sfx.scholarsportal.info/ottawa?url\\_ver=Z39.88-](http://sfx.scholarsportal.info/ottawa?url_ver=Z39.88-)

2004&rft\_val\_fmt=info:ofi/fmt:kev:mtx:journal&genre=article&sid=ProQ:ProQ%3Aericshell&atitle=Does+Pretend+Play+Matter%3F+Searching+for+Evidence%3A+Comment+on+Lillard+et+al.+%282013%29&title=Psychological+Bulletin&issn=00332909&date=2013-01-

01&volume=139&issue=1&spage=45&au=Bergen%2C+Doris&isbn=&jtitle=Psychological+Bulletin&btittle=&rft\_id=info:eric/EJ1006430

ER -

TY - JOUR

ID - 1981

T1 - Teaching Pretend Play to Young Children with Autism

A1 - Barton, Erin E.

A1 - Pavilanis, Rachel

Y1 - 2012/03//

KW - ERIC

KW - Unsupervised Play Addition

KW - ERIC, Current Index to Journals in Education (CIJE)

KW - Teachers

KW - Early Childhood Education

KW - Prompting

KW - Play

KW - Young Children

KW - Intervention

KW - Feedback (Response)

KW - Imagination

KW - Cues

KW - Social Development

KW - Inclusion

KW - Autism

KW - Teaching Methods

RP - NOT IN FILE

SP - 5

EP - 17

JF - Young Exceptional Children

VL - 15

IS - 1

PB - SAGE Publications. 2455 Teller Road, Thousand Oaks, CA 91320.

N2 - Play is a "critical" intervention goal for children with autism in inclusive settings because it sets the occasion for social interactions and communication with peers, caregivers, and teachers, and provides an authentic context for embedding instruction. Furthermore, several research studies have found "pretend" play to be a predictor of social and language skills, particularly for young children with autism. By teaching children with autism to engage in pretend play, teachers are providing opportunities for learning and independence within natural, social settings. Also, because it is flexible and child directed, play provides opportunities for embedding child-focused instruction within and across meaningful activities in natural settings with typical peers. In this article the authors aim to define pretend play (based on recent reviews of the literature; Barton, 2010; Barton & Wolery, 2008) and provide strategies for promoting the independent pretend play skills of children with autism in inclusive classrooms. (Contains 1 figure and 3 tables.)

SN - 1096-2506, 1096-2506

UR - <http://search.proquest.com/docview/968112982?accountid=14701>L2 - [http://sfx.scholarsportal.info/ottawa?url\\_ver=Z39.88-](http://sfx.scholarsportal.info/ottawa?url_ver=Z39.88-)

2004&rft\_val\_fmt=info:ofi/fmt:kev:mtx:journal&genre=article&sid=ProQ:ProQ%3Aericshell&atitle=Teaching+Pretend+Play+to+Young+Children+with+Autism&title=Young+Exceptional+Children&issn=10962506&date=2012-03-

01&volume=15&issue=1&spage=5&au=Barton%2C+Erin+E.%3BPavilanis%2C+Rachel&isbn=&jtitle=Young+Exceptional+Children&bttitle=&rft\_id=info:eric/EJ958518

ER -

TY - JOUR

ID - 1982

T1 - "Some Kids Climb up; Some Kids Climb down": Culturally Constructed Play-Worlds of Children with Impairments

A1 - Burke, Jenene

Y1 - 2012///

KW - ERIC

KW - Unsupervised Play Addition

KW - Australia

KW - ERIC,Current Index to Journals in Education (CIJE)

KW - Elementary Education

KW - Social Influences

KW - Elementary School Students

KW - Self Determination

KW - Play

KW - Observation

KW - CHILDREN

KW - Foreign Countries

KW - Cultural Influences

KW - Social Attitudes

KW - Playgrounds

KW - Disabilities

KW - Evidence

KW - Photography

RP - NOT IN FILE

SP - 965

EP - 981

JF - Disability & Society

VL - 27

IS - 7

PB - Routledge. , 325 Chestnut Street Suite 800, Philadelphia, PA 19106.

N2 - In this paper, the author explores how children with impairments can act as self-monitoring, autonomous individuals in their play in a community playground. In addition, the notion of children with impairments as creative agents in their play is examined. The evidence presented in this paper is derived from the views and perspectives of children with impairments as playground users, and was collected from the children's photographic scrapbooks and the researcher's own observations of children's play in a naturalistic playground setting. The theoretical perspective for this paper draws on the emerging "social model of childhood disability" and provides scope to attempt to understand the culturally constructed play-worlds of children with impairments. (Contains 13 figures.)

SN - 0968-7599, 0968-7599

UR - <http://search.proquest.com/docview/1312420188?accountid=14701>

L2 - [http://sfx.scholarsportal.info/ottawa?url\\_ver=Z39.88-](http://sfx.scholarsportal.info/ottawa?url_ver=Z39.88-)

2004&rft\_val\_fmt=info:ofi/fmt:kev:mtx:journal&genre=article&sid=ProQ:ProQ%3Aericshell&atitle=%22Some+Kids+Climb+up%3B+Some+Kids+Climb+down%22%3A+Culturally+Constructed+Play-Worlds+of+Children+with+Impairments&title=Disability+%26+Society&issn=09687599&date=2012-01-01&volume=27&issue=7&page=965&au=Burke%2C+Jenene&isbn=&jtitle=Disability+%26+Society&btitle=&rft\_id=info:eric/EJ985305

ER -

TY - JOUR

ID - 1984

T1 - Mother-Child Play and Maltreatment: A Longitudinal Analysis of Emerging Social Behavior from Infancy to Toddlerhood

A1 - Valentino,Kristin

A1 - Cicchetti,Dante

A1 - Toth,Sheree L.

A1 - Rogosch,Fred A.

Y1 - 2011/09//

KW - ERIC

KW - Unsupervised Play Addition

KW - ERIC,Current Index to Journals in Education (CIJE)

KW - Low Income Groups

KW - Toddlers

KW - Play

KW - Imitation

KW - Parent Influence

KW - Mothers

KW - Social Behavior

KW - Correlation

KW - Longitudinal Studies

KW - Behavior Problems

KW - Imagination

KW - Cognitive Processes

KW - Interpersonal Competence

KW - Parent Child Relationship

KW - Early Intervention

KW - Social Development

KW - Child Abuse

KW - Age Differences

KW - Infants

RP - NOT IN FILE

SP - 1280

EP - 1294

JF - Developmental Psychology

JA - Dev. Psychol.

VL - 47

IS - 5

PB - American Psychological Association. Journals Department, 750 First Street NE, Washington, DC 20002-4242.

N2 - Mother-child play of maltreating and nonmaltreating families was analyzed when infants were 12 months old (Time 1), and 2 years old (Time 2), as a context to examine children's developing cognitive and social skills. At Time 1, infants from abusing families demonstrated less independent and more imitative behavior during play than did infants from neglecting and nonmaltreating families, suggesting a delay in emerging social behaviors. In this longitudinal follow-up, mother-child play was reassessed 1 year later (N = 78), with a focus on children's engagement in nonplay and pretend play and on children's abilities to initiate social exchanges and respond to parental requests. Play and social behavior were coded from semistructured and unstructured play paradigms at both time points. Maternal attention-directing behavior and limit setting also was assessed. At Time 2, children from abusing, neglecting, and nonmaltreating families did not differ in cognitive play complexity. However, children from abusing families engaged in less child-initiated play than did children from neglecting and nonmaltreating families, demonstrating less socially competent behavior. Longitudinal analyses revealed child initiated play at Time 2 was negatively associated with abuse and with maternal physical attention directing behavior at Time 1. Child negative reactivity at Time 2 was positively associated with Time 1 maternal physical behavior and child imitation and with Time 2 maternal controlling behavior. Implications for early intervention efforts are emphasized. (Contains 8 tables.)

SN - 0012-1649, 0012-1649

UR - <http://search.proquest.com/docview/964178359?accountid=14701>L2 - [http://sfx.scholarsportal.info/ottawa?url\\_ver=Z39.88-](http://sfx.scholarsportal.info/ottawa?url_ver=Z39.88-)

2004&rft\_val\_fmt=info:ofi/fmt:kev:mtx:journal&genre=article&sid=ProQ:ProQ%3Aericshell&atitle=Mother-Child+Play+and+Maltreatment%3A+A+Longitudinal+Analysis+of+Emerging+Social+Behavior+from+Infancy+to+Toddlerhood&title=Developmental+Psychology&issn=00121649&date=2011-09-01&volume=47&issue=5&page=1280&au=Valentino%2C+Kristin%3BCicchetti%2C+Dante%3BToth%2C+Sheree+L.%3BRogosch%2C+Fred+A.&isbn=&jtitle=Developmental+Psychology&bttitle=&rft\_id=info:eric/EJ945351

ER -

TY - JOUR

ID - 1988

T1 - "Good-Fit" Teacher-Child Play Interactions and the Subsequent Autonomous Play of Preschool Children

A1 - Trawick-Smith, Jeffrey

A1 - Dziurgot, Traci

Y1 - 2011///

KW - ERIC

KW - Unsupervised Play Addition

KW - ERIC, Current Index to Journals in Education (CIJE)

KW - Early Childhood Education

KW - Preschool Education

KW - Preschool Teachers

KW - Teacher Student Relationship

KW - Play

KW - Interrater Reliability

KW - Teacher Response

KW - Goodness of Fit

KW - Interviews

KW - Adults

KW - Preschool Children

KW - Models

RP - NOT IN FILE

SP - 110

EP - 123

JF - Early Childhood Research Quarterly

VL - 26

IS - 1

PB - Elsevier. 6277 Sea Harbor Drive, Orlando, FL 32887-4800.

N2 - The purpose of this study was to test a model of adult-child play interactions in preschool classrooms, based on the work of Vygotsky and neo-Vygotskian scholars. The model predicts that adults will tailor the play support they provide to the immediate needs of individual children, and that this will lead to subsequent independent play. Classroom interactions between eight preschool teachers and 32 students were videotaped, transcribed, and analyzed over a six-month period. Interviews were conducted with the eight adult participants to confirm and elucidate findings from observed classroom behaviors. Distinct types of play support needed by children and given by teachers were identified. These were operationally defined; definitions were used to create a coding system that was found to have high inter-rater reliability. Sequential analyses were conducted to determine goodness-of-fit between teacher responses and children's needs. Behavioral outcomes of a good fit were also examined. Findings support the model tested here. Teachers often responded to children's play with behaviors matching the level of support needed. Good-fit interactions more frequently led to autonomous subsequent play than poor-fit interactions. (Contains 5 tables and 2 figures.)

SN - 0885-2006, 0885-2006

UR - <http://search.proquest.com/docview/822506346?accountid=14701>

L2 - [http://sfx.scholarsportal.info/ottawa?url\\_ver=Z39.88-](http://sfx.scholarsportal.info/ottawa?url_ver=Z39.88-)

2004&rft\_val\_fmt=info:ofi/fmt:kev:mtx:journal&genre=article&sid=ProQ:ProQ%3Aericshell&atitle=%22Good-Fit%22+Teacher-

Child+Play+Interactions+and+the+Subsequent+Autonomous+Play+of+Preschool+Children&title=Early+Childhood+Research+Quarterly&issn=08852006&date=2011-01-

01&volume=26&issue=1&spage=110&au=Trawick-

Smith%2C+Jeffrey%3BDziurgot%2C+Traci&isbn=&jtitle=Early+Childhood+Research+Quarterly&bttitle=&rft\_id=info:eric/EJ906817

ER -

TY - JOUR

ID - 1989

T1 - Thinking about Evolution: Combinatorial Play as a Strategy for Exercising Scientific Creativity

A1 - Wingate, Richard J.

Y1 - 2011///

KW - ERIC

KW - Unsupervised Play Addition

KW - ERIC, Current Index to Journals in Education (CIJE)

KW - Higher Education

KW - Science Education

KW - Thinking Skills

KW - Undergraduate Students

KW - Zoology

KW - Play

KW - Case Studies

KW - Brain

KW - Models

KW - Creative Teaching

KW - Scientists

KW - Cognitive Processes

KW - Classification

KW - Tests

KW - Biomedicine

KW - Universities

RP - NOT IN FILE

SP - 50

EP - 53

JF - Journal of Biological Education

VL - 45

IS - 1

PB - Routledge. , 325 Chestnut Street Suite 800, Philadelphia, PA 19106.

N2 - An enduring focus in education on how scientists formulate experiments and "do science" in the laboratory has excluded a vital element of scientific practice: the creative and imaginative thinking that generates models and testable hypotheses. In this case study, final-year biomedical sciences university students were invited to create and justify a taxonomy of selected vertebrates on the basis of their brain organisation, as part of an exercise exploring the evolution of embryonic development. While raising a number of issues surrounding the context and methods of comparative zoology, this exercise also invoked a set of cognitive processes that can neither be adequately characterised as role-play nor critical thinking. By contrast, the act of formulating and justifying taxonomy identifies a style of creative thought that is a prerequisite for hypothesis formation. A defining characteristic of this exercise is that it engages activities that are independent of disciplinary perspective. This flexibility in approach may provide a route through to defining what qualifies as a creative teaching exercise in science. (Contains 1 figure.)

SN - 0021-9266, 0021-9266

UR - <http://search.proquest.com/docview/898323655?accountid=14701>

L2 - [http://sfx.scholarsportal.info/ottawa?url\\_ver=Z39.88-](http://sfx.scholarsportal.info/ottawa?url_ver=Z39.88-)

2004&rft\_val\_fmt=info:ofi/fmt:kev:mtx:journal&genre=article&sid=ProQ:ProQ%3Aericshell&atitle=Thinking+about+Evolution%3A+Combinatorial+Play+as+a+Strategy+for+Exercising+Scientific+Creativity&title=Journal+of+Biological+Education&issn=00219266&date=2011-01-

01&volume=45&issue=1&spage=50&au=Wingate%2C+Richard+J.&isbn=&jtitle=Journal+of+Biological+Education&btitle=&rft\_id=info:eric/EJ937398

ER -

TY - JOUR

ID - 1990

T1 - Parents as Play Date Facilitators for Preschoolers with Autism

A1 - Jull,Stephanie

A1 - Mirenda,Pat

Y1 - 2011/01//

KW - ERIC

KW - Unsupervised Play Addition

KW - Canada

KW - British Columbia

KW - ERIC,Current Index to Journals in Education (CIJE)

KW - Social Influences

KW - Program Effectiveness

KW - Interaction

KW - Play

KW - MALES

KW - Cooperation

KW - Parent Role

KW - Intervention

KW - Skill Development

KW - Friendship

KW - Foreign Countries

KW - Interpersonal Competence

KW - Affective Behavior

KW - Reinforcement

KW - Parent Attitudes

KW - Preschool Children

KW - Parents

KW - Interpersonal Relationship

KW - Autism

RP - NOT IN FILE

SP - 17

EP - 30

JF - Journal of Positive Behavior Interventions

VL - 13

IS - 1

PB - SAGE Publications and Hammill Institute on Disabilities. 2455 Teller Road, Thousand Oaks, CA 91320.

N2 - Teaching children with autism to interact with their typically developing peers can be a challenge.

Previous research has documented that there are many effective ways to teach social interaction; however, interventions in this regard are usually implemented by professionals. The purpose of this study was to assess the effectiveness of parent-implemented contextually supported play dates. Two parents were taught to design cooperative play arrangements to facilitate social interactions between their children with autism and typically developing peers in their homes. Two independent reversal designs were used to demonstrate functional relationships between parent-implemented, contextually supported play dates and an increase in synchronous reciprocal interactions for both participants. Social validity, both immediately after the intervention and 1 year later, was also high for both parents; however, there was no consistent impact on participant, confederate, or parent affect during the study. The results are discussed with reference to previous research, future directions, limitations, and implications for practice. (Contains 4 tables and 2 figures.)

SN - 1098-3007, 1098-3007

UR - <http://search.proquest.com/docview/851229391?accountid=14701>

L2 - [http://sfx.scholarsportal.info/ottawa?url\\_ver=Z39.88-](http://sfx.scholarsportal.info/ottawa?url_ver=Z39.88-)

2004&rft\_val\_fmt=info:ofi/fmt:kev:mtx:journal&genre=article&sid=ProQ:ProQ%3Aericshell&atitle=Parents+a  
s+Play+Date+Facilitators+for+Preschoolers+with+Autism&title=Journal+of+Positive+Behavior+Interventions  
&issn=10983007&date=2011-01-

01&volume=13&issue=1&spage=17&au=Jull%2C+Stephanie%3BMirenda%2C+Pat&isbn=&jtitle=Journal+of  
+Positive+Behavior+Interventions&bttitle=&rft\_id=info:eric/EJ909164

ER -

TY - JOUR

ID - 1991

T1 - Affordances in Outdoor Environments and Children's Physically Active Play in Pre-School

A1 - Storli,Rune

A1 - Hagen,Trond Loge

Y1 - 2010/12//

KW - ERIC

KW - Unsupervised Play Addition

KW - ERIC,Current Index to Journals in Education (CIJE)

KW - Early Childhood Education



KW - Preschool Education

KW - Physical Activities

KW - Play

KW - Physical Environment

KW - Environmental Influences

KW - Playgrounds

KW - School Culture

KW - Preschool Children

RP - NOT IN FILE

SP - 445

EP - 456

JA - European Early Childhood Education Research Journal

VL - 18

IS - 4

PB - Routledge, 325 Chestnut Street Suite 800, Philadelphia, PA 19106.

N2 - The purpose of this article is to quantitatively and qualitatively explore children's physically active play outdoors in a traditional playground and natural (nature) environment and discuss how these environments influence children's physical activity. Fjortoft has previously explored the relationship between environmental affordances and children's play and development. She suggests that environmental complexity and diversity in nature are highly associated with increased play opportunities and activities. To explore the interactive relationship between children and their material environments, Kytta has theoretically specified and clarified this relationship in the view of ecological perceptual psychology based on Gibson's theory of affordances. To understand how affordances in the play environment influence 3- to 5-year-old children's (n = 16) level of physical activity play, accelerometers were used to measure physically active play, and Heft's functional taxonomy of children's outdoor play environment was utilised in observing how the children actualised the potential affordances in free play. The results show there is no difference in the level of physically active play between the traditional playground environment and the natural environment in this study. Strong correlations of level of physically active play on an individual basis were found among the different days. This indicates that the children's physically active behaviour on an individual basis is similar from day-to-day, relatively independent of the environment. In analysing these results for the potential benefits of physically active play in pre-school, constraints in the individual (personal characteristics), the physical environment (complexity, diversity) and the sociocultural environment (pre-school culture) are discussed. (Contains 1 note, 4 tables, and 3 figures.)

SN - 1350-293X, 1350-293X

UR - <http://search.proquest.com/docview/851229943?accountid=14701>

L2 - [http://sfx.scholarsportal.info/ottawa?url\\_ver=Z39.88-](http://sfx.scholarsportal.info/ottawa?url_ver=Z39.88-)

2004&rft\_val\_fmt=info:ofi/fmt:kev:mtx:journal&genre=article&sid=ProQ:ProQ%3Aericshell&atitle=Affordances+in+Outdoor+Environments+and+Children%27s+Physically+Active+Play+in+Pre-School&title=European+Early+Childhood+Education+Research+Journal&issn=1350293X&date=2010-12-01&volume=18&issue=4&page=445&au=Storli%2C+Rune%3BHagen%2C+Trond+Loge&isbn=&jtitle=European+Early+Childhood+Education+Research+Journal&bttitle=&rft\_id=info:eric/EJ908420

ER -

TY - JOUR

ID - 1992

T1 - Teaching Children with Autism to Play a Video Game Using Activity Schedules and Game-Embedded Simultaneous Video Modeling

A1 - Blum-Dimaya,Alyssa

A1 - Reeve,Sharon A.

A1 - Reeve,Kenneth F.

A1 - Hoch,Hannah

Y1 - 2010/08//

KW - ERIC

KW - Unsupervised Play Addition

KW - ERIC,Current Index to Journals in Education (CIJE)

KW - Program Effectiveness

KW - Video Games  
 KW - Video Technology  
 KW - Play  
 KW - Scheduling  
 KW - Interpersonal Competence  
 KW - Leisure Time  
 KW - Reinforcement  
 KW - Role Models  
 KW - Autism  
 KW - Teaching Methods  
 RP - NOT IN FILE  
 SP - 351  
 EP - 370  
 JF - Education and Treatment of Children  
 VL - 33  
 IS - 3  
 PB - West Virginia University Press. P.O. Box 6295, West Virginia University, Morgantown, WV 26506.  
 N2 - Children with autism have severe and pervasive impairments in social interactions and communication that impact most areas of daily living and often limit independent engagement in leisure activities. We taught four children with autism to engage in an age-appropriate leisure skill, playing the video game Guitar Hero II[TM], through the use of (a) an activity schedule to set up, turn on, and turn of the game and system, (b) simultaneous video modeling embedded in the game to teach manipulation of the Guitar Hero II[TM] controller to play the game, and (c) the training of multiple exemplars of songs to develop a generalized repertoire of playing Guitar Hero II[TM]. A multiple-probe design across participants was used to evaluate the effectiveness of the training package. All of the participants successfully learned to play Guitar Hero II[TM] and playing skills generalized to a song and a setting not used during training. (Contains 2 tables and 3 figures.)  
 SN - 0748-8491, 0748-8491  
 UR - <http://search.proquest.com/docview/757168659?accountid=14701>  
 L2 - [http://sfx.scholarsportal.info/ottawa?url\\_ver=Z39.88-2004&rft\\_val\\_fmt=info:ofi/fmt:kev:mtx:journal&genre=article&sid=ProQ:ProQ%3Aericshell&atitle=Teaching+Children+with+Autism+to+Play+a+Video+Game+Using+Activity+Schedules+and+Game-Embedded+Simultaneous+Video+Modeling&title=Education+and+Treatment+of+Children&issn=07488491&date=2010-08-01&volume=33&issue=3&spage=351&au=Blum-Dimaya%2C+Alyssa%3BReeve%2C+Sharon+A.%3BReeve%2C+Kenneth+F.%3BHoch%2C+Hannah&isbn=&jtitle=Education+and+Treatment+of+Children&bttitle=&rft\\_id=info:eric/EJ893791](http://sfx.scholarsportal.info/ottawa?url_ver=Z39.88-2004&rft_val_fmt=info:ofi/fmt:kev:mtx:journal&genre=article&sid=ProQ:ProQ%3Aericshell&atitle=Teaching+Children+with+Autism+to+Play+a+Video+Game+Using+Activity+Schedules+and+Game-Embedded+Simultaneous+Video+Modeling&title=Education+and+Treatment+of+Children&issn=07488491&date=2010-08-01&volume=33&issue=3&spage=351&au=Blum-Dimaya%2C+Alyssa%3BReeve%2C+Sharon+A.%3BReeve%2C+Kenneth+F.%3BHoch%2C+Hannah&isbn=&jtitle=Education+and+Treatment+of+Children&bttitle=&rft_id=info:eric/EJ893791)  
 ER -  
  
 TY - JOUR  
 ID - 1993  
 T1 - A Turkish View on Fathers' Involvement in Children's Play  
 A1 - Ivrendi,Asiye  
 A1 - Isikoglu,Nesrin  
 Y1 - 2010/04//  
 KW - ERIC  
 KW - Unsupervised Play Addition  
 KW - Turkey  
 KW - ERIC,Current Index to Journals in Education (CIJE)  
 KW - Employment Level  
 KW - Socioeconomic Influences  
 KW - Foreign Countries  
 KW - Play  
 KW - Gender Differences  
 KW - Family Structure  
 KW - Parent Child Relationship  
 KW - Parent Participation  
 KW - Statistical Analysis

KW - Parent Attitudes

KW - Fathers

RP - NOT IN FILE

SP - 519

EP - 526

JF - Early Childhood Education Journal

VL - 37

IS - 6

PB - Springer. 233 Spring Street, New York, NY 10013.

N2 - The purpose of this study is to examine fathers' participation in and views about play. This study was conducted in the southwestern part of Turkey and its sample consisted of 97 fathers who had a child attending randomly chosen public early childhood institutions. The Parents' Participation and Views on Play instrument was developed and used to collect data. Independent sample t tests and a series of repeated measures analysis of variance procedures were conducted to assess the influence of independent variables on the fathers' participation in and views on play. The results of the study indicated that fathers frequently participated in their children's play, and they hold positive views about play. Fathers' socio-demographic characteristics such as income, working status, family type and children's gender influenced their participation and views about play. Results are discussed in relation to the literature on parent-child play and suggestions for further research are presented

SN - 1082-3301, 1082-3301

UR - <http://search.proquest.com/docview/742867211?accountid=14701>

L2 - [http://sfx.scholarsportal.info/ottawa?url\\_ver=Z39.88-](http://sfx.scholarsportal.info/ottawa?url_ver=Z39.88-)

2004&rft\_val\_fmt=info:ofi/fmt:kev:mtx:journal&genre=article&sid=ProQ:ProQ%3Aericshell&atitle=A+Turkish+View+on+Fathers%27+Involvement+in+Children%27s+Play&title=Early+Childhood+Education+Journal&issn=10823301&date=2010-04-

01&volume=37&issue=6&page=519&au=Ivrendi%2C+Asiye%3BIsikoglu%2C+Nesrin&isbn=&jtitle=Early+Childhood+Education+Journal&bttitle=&rft\_id=info:eric/EJ878269

ER -

TY - JOUR

ID - 1994

T1 - Approaching Complexity through Planful Play: Kindergarten Children's Strategies in Constructing an Autonomous Robot's Behavior

A1 - Levy, T.S.

A1 - Mioduser, D.

Y1 - 2010/04//

KW - ERIC

KW - Unsupervised Play Addition

KW - ERIC, Current Index to Journals in Education (CIJE)

KW - Early Childhood Education

KW - Kindergarten

KW - Robotics

KW - Programming

KW - Play

KW - Young Children

KW - Cybernetics

KW - Learning Processes

KW - Investigations

KW - Student Behavior

KW - Spatial Ability

KW - Educational Technology

KW - Learning Strategies

RP - NOT IN FILE

SP - 21

EP - 43

JF - International Journal of Computers for Mathematical Learning

VL - 15

IS - 1

PB - Springer. 233 Spring Street, New York, NY 10013.

N2 - This study investigates how young children master, construct and understand intelligent rule-based robot behaviors, focusing on their strategies in gradually meeting the tasks' complexity. The wider aim is to provide a comprehensive map of the kinds of transitions and learning that take place in constructing simple emergent behaviors, particularly for young children. Six kindergarten children participated individually in the study along five sessions. Regarding modes of engagement, it was found that the children conducted intensive and extended playful investigations of the robot's behaviors, interacting with it in a variety of ways; it was also found that their constructions were planful and anticipatory, as they could simulate how the behaviors play out even prior to running their programs. Three kinds of transitions were found in the children's comprehension of the system: one involved adaptation to the formal language; the second, coordination of multiple spatial perspectives; and the third involved a shift from viewing rules as one-time events to their view as recurring and continual descriptions of a process. Finally, it was found that the children employed two strategies to reduce the amount of information in the system: "pruning" involved ignoring part of the logical structure and focusing on another; "fusing" involved coalescing several rules or functions into one. These results are discussed with respect to previous literature on children's programming and with regards to understanding and supporting young children's learning through their construction of adaptive autonomous behaviors

SN - 1382-3892, 1382-3892

UR - <http://search.proquest.com/docview/742872036?accountid=14701>L2 - [http://sfx.scholarsportal.info/ottawa?url\\_ver=Z39.88-](http://sfx.scholarsportal.info/ottawa?url_ver=Z39.88-)

2004&rft\_val\_fmt=info:ofi/fmt:kev:mtx:journal&genre=article&sid=ProQ:ProQ%3Aericshell&atitle=Approaching+Complexity+through+Planful+Play%3A+Kindergarten+Children%27s+Strategies+in+Constructing+an+Autonomous+Robot%27s+Behavior&title=International+Journal+of+Computers+for+Mathematical+Learning&issn=13823892&date=2010-04-

01&volume=15&issue=1&page=21&au=Levy%2C+T.+S.%3BMioduser%2C+D.&isbn=&jtitle=International+Journal+of+Computers+for+Mathematical+Learning&bttitle=&rft\_id=info:eric/EJ883931

ER -

TY - JOUR

ID - 1996

T1 - Preschool Children's Outdoor Play Area Preferences

A1 - Holmes, Robyn M.

A1 - Procaccino, Jill K.

Y1 - 2009/12//

KW - ERIC

KW - Unsupervised Play Addition

KW - ERIC, Current Index to Journals in Education (CIJE)

KW - Early Childhood Education

KW - Play

KW - Gender Differences

KW - Playgrounds

KW - MALES

KW - Naturalistic Observation

KW - Decision Making

KW - Preschool Children

KW - Playground Activities

RP - NOT IN FILE

SP - 1103

EP - 1112

JF - Early Child Development and Care

VL - 179

IS - 8

PB - Routledge. , 325 Chestnut Street Suite 800, Philadelphia, PA 19106.

N2 - This study explores preschool children's outdoor play preferences. The sample was 40 (20 male, 20 female) primarily European-American three and four year olds. Data were collected via naturalistic observation and analyzed using repeated measures ANOVAs and MANOVAs. The independent variable was sex of child;

dependent variable was play space (riding, sandbox, slide, jungle gym, open space, castle/play house, swings). Findings revealed a significant effect of sex of child on choice of play space--boys preferred to play on the jungle gym and swings, whereas girls preferred the sandbox more than boys. These findings both support and contradict existing literature. Future research should pursue children's use of microspaces in their play environments. (Contains 1 figure and 3 tables.)

SN - 0300-4430, 0300-4430

UR - <http://search.proquest.com/docview/61836494?accountid=14701>

L2 - [http://sfx.scholarsportal.info/ottawa?url\\_ver=Z39.88-](http://sfx.scholarsportal.info/ottawa?url_ver=Z39.88-)

2004&rft\_val\_fmt=info:ofi/fmt:kev:mtx:journal&genre=article&sid=ProQ:ProQ%3Aericshell&atitle=Preschool+Children%27s+Outdoor+Play+Area+Preferences&title=Early+Child+Development+and+Care&issn=03004430&date=2009-12-

01&volume=179&issue=8&spage=1103&au=Holmes%2C+Robyn+M.%3BProcaccino%2C+Jill+K.&isbn=&jtitle=Early+Child+Development+and+Care&bttitle=&rft\_id=info:eric/EJ863093

ER -

TY - JOUR

ID - 1997

T1 - Safe Play Areas for Prevention of Young Children Drowning in Farm Dams

A1 - Depczynski,Julie

A1 - Fragar,Lyn

A1 - Hawkins,Antonia

A1 - Stiller,Laurence

Y1 - 2009/09//

KW - ERIC

KW - Unsupervised Play Addition

KW - Australia

KW - ERIC,Current Index to Journals in Education (CIJE)

KW - Program Effectiveness

KW - Death

KW - Play

KW - Young Children

KW - SURVEYS

KW - Intervention

KW - Rural Areas

KW - Water

KW - Child Safety

KW - Mass Media Effects

KW - Foreign Countries

KW - Recreational Activities

KW - Agricultural Occupations

KW - Accident Prevention

RP - NOT IN FILE

SP - 50

EP - 57

JF - Australasian Journal of Early Childhood

VL - 34

IS - 3

PB - Early Childhood Australia. P.O. Box 7105, Watson, ACT 2602, Australia. Tel: +61-2-6242-1800; Fax: +61-2-6242-1818; e-mail: [publishing@earlychildhood.org.au](mailto:publishing@earlychildhood.org.au); Web site:

<http://www.earlychildhoodaustralia.org.au>

N2 - Injuries are the leading cause of death to young children in rural Australia, with drowning in farm dams being a major risk. This paper assesses the impact of an intervention to increase safe play areas on farms to prevent unsupervised access by young children to water bodies and other hazards. Surveys of 1,117 adult farmers attending Ag Quip Agricultural Field Days in NSW between 2003 and 2007 were used to identify the child security level of fences and changes in the percentage of farms with fenced house yards. Over this four-year period, the percentage of people who had a fenced yard on their farm ranged from 75 per cent to 79 per

cent with no significant fluctuations. However, those with a safe play area who stated the area was difficult/almost impossible for a child 0-5yrs to breach, ranged from 40 per cent to 55 per cent over the period, with a statistically significant positive trend ( $X^2=13.46$   $df=4$   $p[\text{less than or equal}] 0.01$ ). Actions to improve child safety on farms and recall of child farm safety messages in the media in association with programs promoting securely fenced house yards are also discussed. In order to affect further reduction in child drowning incidents, there is an ongoing need to promote improved security of fenced house yards on farms in Australia.

(Contains 2 tables and 5 figures.)

SN - 1836-9391, 1836-9391

UR - <http://search.proquest.com/docview/61810683?accountid=14701>

L2 - [http://sfx.scholarsportal.info/ottawa?url\\_ver=Z39.88-](http://sfx.scholarsportal.info/ottawa?url_ver=Z39.88-)

2004&rft\_val\_fmt=info:ofi/fmt:kev:mtx:journal&genre=article&sid=ProQ:ProQ%3Aericshell&atitle=Safe+Play+Areas+for+Prevention+of+Young+Children+Drowning+in+Farm+Dams&title=Australasian+Journal+of+Early+Childhood&issn=18369391&date=2009-09-

01&volume=34&issue=3&spage=50&au=Depczynski%2C+Julie%3BFrager%2C+Lyn%3BHawkins%2C+Antonia%3BStiller%2C+Laurence&isbn=&jtitle=Australasian+Journal+of+Early+Childhood&btitle=&rft\_id=info:eric/EJ869666

ER -

TY - JOUR

ID - 1998

T1 - Discipline and Play with/in a Mandated Literacy Curriculum

A1 - Kontovourki,Stavroula

A1 - Siegel,Marjorie

Y1 - 2009/09//

KW - ERIC

KW - Unsupervised Play Addition

KW - New York

KW - No Child Left Behind Act 2001

KW - ERIC,Current Index to Journals in Education (CIJE)

KW - Elementary Education

KW - Writing Instruction

KW - Beginning Reading

KW - Play

KW - Independent Reading

KW - Curriculum

KW - Kindergarten

KW - Literacy

KW - Discipline

KW - Inquiry

KW - Teaching Methods

RP - NOT IN FILE

SP - 30

EP - 38

JF - Language Arts

VL - 87

IS - 1

PB - National Council of Teachers of English. 1111 West Kenyon Road, Urbana, IL 61801-1096.

N2 - In this article, the authors explore a young child's lived experience of discipline and play with/in a mandated balanced literacy curriculum. Mandating balanced literacy presents an interesting case of disciplining literacy because it is rooted in the progressive tradition of meaning-and-process pedagogies. As such, it avoids the most obvious forms of regulation and control found in scripted lessons, yet imposes particular meanings of literacy, teaching, and learning on teachers and children. Drawing on data from a year-long inquiry of one kindergarten classroom, the authors demonstrate how the mandated curriculum disciplined Hector and his teacher but also how they played with/in this curriculum. The slash between "with" and "in" serves to highlight the fact that Hector never escaped the limits of the mandated curriculum. Sometimes he was "in" the curriculum, so fully disciplined by it that he sought out recognition as a successful reader and writer. Other times, he played

within the spaces made available by independent reading and writing time. In these cases, he untethered school literacy from its individualistic and monomodal roots, but his play remained "within" the bounds of the curricular routines. The fluency with which Hector shifted from a writer at play to a student at work points to the complexities of policy mandates and their enactment in classrooms. (Contains 1 figure.)

SN - 0360-9170, 0360-9170

UR - <http://search.proquest.com/docview/61842604?accountid=14701>

L2 - [http://sfx.scholarsportal.info/ottawa?url\\_ver=Z39.88-](http://sfx.scholarsportal.info/ottawa?url_ver=Z39.88-)

2004&rft\_val\_fmt=info:ofi/fmt:kev:mtx:journal&genre=article&sid=ProQ:ProQ%3Aericshell&atitle=Discipline+and+Play+with%2Fin+a+Mandated+Literacy+Curriculum&title=Language+Arts&issn=03609170&date=2009-09-

01&volume=87&issue=1&spage=30&au=Kontovourki%2C+Stavroula%3BSiegel%2C+Marjorie&isbn=&jtitle=Language+Arts&bttitle=&rft\_id=info:eric/EJ856168

ER -

TY - GEN

ID - 1999

T1 - Interactive Computer Play in Rehabilitation of Children with Sensorimotor Disorders: A Systematic Review

A1 - Sandlund, Marlene

A1 - McDonough, Suzanne

A1 - Hager-Ross, Charlotte

Y1 - 2009/03//

N1 - Last updated - 2012-12-14

KW - ERIC

KW - Unsupervised Play Addition

KW - ERIC, Current Index to Journals in Education (CIJE)

KW - Program Effectiveness

KW - Play

KW - Motivation

KW - Motion

KW - Rehabilitation

KW - Case Studies

KW - Computers

KW - Intervention

KW - Literature Reviews

KW - Cerebral Palsy

KW - Sensory Integration

KW - Child Development

KW - Spatial Ability

KW - Psychomotor Skills

KW - Physical Disabilities

RP - NOT IN FILE

SP - 173

EP - 179

JF - Developmental Medicine & Child Neurology

JA - Dev. Med Child Neurol.

VL - 51

IS - 3

PB - Wiley-Blackwell. 350 Main Street, Malden, MA 02148.

N2 - The aim of this review was to examine systematically the evidence for the application of interactive computer play in the rehabilitation of children with sensorimotor disorders. A literature search of 11 electronic databases was conducted to identify articles published between January 1995 and May 2008. The review was restricted to reports of intervention studies evaluating the impact of interactive computer play on motor rehabilitation in children. For each study the quality of the methods and the strength of the evidence were assessed by two independent reviewers using the guidelines of the American Academy for Cerebral Palsy and Developmental Medicine. A total of 74 articles were identified, of which 16 met the inclusion criteria. Three

studies were randomized controlled trials (RCTs) and half were case series or case reports. Areas investigated were movement quality, spatial orientation and mobility, and motivational aspects. Thirteen studies presented positive findings. Two of the three RCTs investigating movement quality and one level III study examining spatial orientation showed no significant improvements. Interactive computer play is a potentially promising tool for the motor rehabilitation of children but the level of evidence is too limited to assess its value fully.

Further and more convincing research is needed

UR - <http://search.proquest.com/docview/61863398?accountid=14701>

L2 - [http://sfx.scholarsportal.info/ottawa?url\\_ver=Z39.88-](http://sfx.scholarsportal.info/ottawa?url_ver=Z39.88-)

2004&rft\_val\_fmt=info:ofi/fmt:kev:mtx:journal&genre=article&sid=ProQ:ProQ%3Aericshell&atitle=Interactive+Computer+Play+in+Rehabilitation+of+Children+with+Sensorimotor+Disorders%3A+A+Systematic+Review&title=Developmental+Medicine+%26+Child+Neurology&issn=00121622&date=2009-03-

01&volume=51&issue=3&page=173&au=Sandlund%2C+Marlene%3BMcDonough%2C+Suzanne%3BHager-Ross%2C+Charlotte&isbn=&jtitle=Developmental+Medicine+%26+Child+Neurology&bttitle=&rft\_id=info:eri

c/EJ849941

ER -

TY - JOUR

ID - 2000

T1 - What Kids Don't Get to Do Anymore and Why

A1 - Sutterby, John A.

Y1 - 2009///

KW - ERIC

KW - Unsupervised Play Addition

KW - ERIC, Current Index to Journals in Education (CIJE)

KW - Mortality Rate

KW - Play

KW - Anxiety

KW - Leisure Time

KW - Parent Role

KW - Child Safety

KW - Caregivers

KW - Parenting Styles

KW - Access to Information

KW - Child Rearing

KW - Child Development

KW - Parent Attitudes

RP - NOT IN FILE

SP - 289

JF - Childhood Education

VL - 85

IS - 5

PB - Association for Childhood Education International. 17904 Georgia Avenue Suite 215, Olney, MD 20832.

N2 - Since 1981, the amount of time children spend with each other or alone without adult supervision has declined, especially in the area of outdoor free play. Free time for children has declined 16% between 1981 and 1997. A number of researchers have examined societal changes over the last century, especially from the mid-1970s to today. According to Stearns (2003), parental anxiety has risen throughout the 20th century, as children are perceived as both more valuable and more vulnerable. With falling mortality rates for children and increases in parental advice came the idea that if anything bad happened to the child, then the parents were somehow responsible. In this article, the author takes a recent historical look at the role of parents in keeping children safe. The author explores the increase in parental anxiety, the role of information in creating this anxiety, and the resultant consequences for children. The author concludes with a call for caregivers to use both common sense and research, rather than media hype, to guide their child-rearing practices

SN - 0009-4056, 0009-4056

UR - <http://search.proquest.com/docview/61861551?accountid=14701>

L2 - [http://sfx.scholarsportal.info/ottawa?url\\_ver=Z39.88-](http://sfx.scholarsportal.info/ottawa?url_ver=Z39.88-)

2004&rft\_val\_fmt=info:ofi/fmt:kev:mtx:journal&genre=article&sid=ProQ:ProQ%3Aericshell&atitle=What+Ki



ds+Don%27t+Get+to+Do+Anymore+and+Why&title=Childhood+Education&issn=00094056&date=2009-01-01&volume=85&issue=5&page=289&au=Sutterby%2C+John+A.&isbn=&jtitle=Childhood+Education&bttitle=&rft\_id=info:eric/EJ848631

ER -

TY - JOUR

ID - 2001

T1 - Embedding Sensory Preference into Toys to Enhance Toy Play in Toddlers with Disabilities

A1 - DiCarlo,Cynthia F.

A1 - Schepis,Maureen M.

A1 - Flynn,Linda

Y1 - 2009///

KW - ERIC

KW - Unsupervised Play Addition

KW - ERIC,Current Index to Journals in Education (CIJE)

KW - Program Effectiveness

KW - Sensory Experience

KW - Toddlers

KW - Play

KW - Perceptual Development

KW - Disabilities

KW - Child Development

KW - Stimuli

KW - Sensory Training

KW - Toys

RP - NOT IN FILE

SP - 188

EP - 200

JF - Infants and Young Children

VL - 22

IS - 3

PB - Lippincott Williams & Wilkins. 351 West Camden Street, Baltimore, MD 21201.

N2 - Playing with toys as a means of environmental engagement has long been considered important in early child development (D. J. Messer, D. Rachford, M. E. McCarthy, & L. J. Yarrow, 1987; M. Wolery, M. G. Werts, & M. Holcombe, 1994). However, children with highly significant disabilities often engage in toy play less frequently than their peers without disabilities (P. M. Blasco, D. B. Bailey, & M. A. Burchinal, 1993; C. F. DiCarlo, D. H. Reid, & S. B. Stricklin, 2003; M. B. Langley, 1985) and frequently need specialized support to promote toy play (J. J. Ivory & J. A. McCollum, 1999; M. B. Langley, 1985; S. Sandall, 2003). In this study, preference assessment technology was used to identify preferred sensory attributes of very young children. Once identified, those attributes were embedded into a toy previously identified as nonpreferred. The initial paired-item presentation consisted of a rotation of 4 toys from the natural environment using a child-directed approach, which consisted of choice, prompting, and praise for completion of functional toy play. An additional condition added the child's preferred sensory attribute to a nonpreferred toy using the above-mentioned procedures.

Results indicated that the addition of a preferred sensory attribute increased selection of that toy with 2 of 3 children and resulted in increased independent functional toy play for all 3 children

SN - 0896-3746, 0896-3746

UR - <http://search.proquest.com/docview/742874687?accountid=14701>

L2 - [http://sfx.scholarsportal.info/ottawa?url\\_ver=Z39.88-](http://sfx.scholarsportal.info/ottawa?url_ver=Z39.88-)

2004&rft\_val\_fmt=info:ofi/fmt:kev:mtx:journal&genre=article&sid=ProQ:ProQ%3Aericshell&atitle=Embedding+Sensory+Preference+into+Toys+to+Enhance+Toy+Play+in+Toddlers+with+Disabilities&title=Infants+and+Young+Children&issn=08963746&date=2009-01-

01&volume=22&issue=3&page=188&au=DiCarlo%2C+Cynthia+F.%3BSchepis%2C+Maureen+M.%3BFlynn%2C+Linda&isbn=&jtitle=Infants+and+Young+Children&bttitle=&rft\_id=info:eric/EJ884516

ER -

TY - JOUR

ID - 2003

T1 - Do Children Prefer Contingencies? An Evaluation of the Efficacy of and Preference for Contingent versus Noncontingent Social Reinforcement during Play

A1 - Luczynski, Kevin C.

A1 - Hanley, Gregory P.

Y1 - 2009///

KW - ERIC

KW - Unsupervised Play Addition

KW - ERIC, Current Index to Journals in Education (CIJE)

KW - Preschool Education

KW - Contingency Management

KW - Social Reinforcement

KW - Interaction

KW - Play

KW - Child Behavior

KW - Behavior Modification

KW - Attitude Measures

KW - Preschool Children

KW - CHILDREN

KW - Interpersonal Relationship

RP - NOT IN FILE

SP - 511

EP - 525

JF - Journal of Applied Behavior Analysis

JA - J Appl. Behav. Anal.

VL - 42

IS - 3

PB - Society for the Experimental Analysis of Behavior. , Kansas University, 1000 Sunnyside Avenue, Lawrence, KS 66045-2133.

N2 - Discovering whether children prefer reinforcement via a contingency or independent of their behavior is important considering the ubiquity of these programmed schedules of reinforcement. The current study evaluated the efficacy of and preference for social interaction within differential reinforcement of alternative behavior (DRA) and noncontingent reinforcement (NCR) schedules with typically developing children. Results showed that 7 of the 8 children preferred the DRA schedule; 1 child was indifferent. We also demonstrated a high degree of procedural fidelity, which suggested that preference is influenced by the presence of a contingency under which reinforcement can be obtained. These findings are discussed in terms of (a) the selection of reinforcement schedules in practice, (b) variables that influence children's preferences for contexts, and (c) the selection of experimental control procedures when evaluating the effects of reinforcement. (Contains 6 figures.)

SN - 0021-8855, 0021-8855

UR - <http://search.proquest.com/docview/61833643?accountid=14701>

L2 - [http://sfx.scholarsportal.info/ottawa?url\\_ver=Z39.88-](http://sfx.scholarsportal.info/ottawa?url_ver=Z39.88-)

2004&rft\_val\_fmt=info:ofi/fmt:kev:mtx:journal&genre=article&sid=ProQ:ProQ%3Aericshell&atitle=Do+Child ren+Prefer+Contingencies%3F+An+Evaluation+of+the+Efficacy+of+and+Preference+for+Contingent+versus+ Noncontingent+Social+Reinforcement+during+Play&title=Journal+of+Applied+Behavior+Analysis&issn=002 18855&date=2009-01-

01&volume=42&issue=3&spage=511&au=Luczynski%2C+Kevin+C.%3BHanley%2C+Gregory+P.&isbn=&jti tle=Journal+of+Applied+Behavior+Analysis&bttitle=&rft\_id=info:eric/EJ859306

ER -

TY - RPRT

ID - 2005

T1 - Using Stimulus Pairing to Enhance Observational Learning of Peer Initiations for a Child with Autism in a Community Play Group

A1 - Silla, Vanessa A.

A1 - Vesloski, Mary J.

Y1 - 2008/04/11/

N1 - Last updated - 2012-12-14

KW - ERIC

KW - Unsupervised Play Addition

KW - ERIC,Resources in Education (RIE)

KW - Observational Learning

KW - Case Studies

KW - Intervention

KW - Outcomes of Treatment

KW - Play Therapy

KW - Associative Learning

KW - Child Development

KW - Stimuli

KW - Association (Psychology)

KW - Peer Groups

KW - SOCIAL psychology

KW - Autism

RP - NOT IN FILE

SP - 23

N2 - The importance of play in child development and the barriers that individuals with autism face regarding play skills requires us to identify specific interventions which can assist in the development of such skills.

Stimulus pairing, which has been documented as a procedure by which an event comes to elicit a response by being paired with an event that elicits that response (Chance, 1998), may be of benefit during play activities.

This study attempted to evaluate the influence of the use of Stimulus pairing procedures to pair typical children with preferred tangibles and activities. This study also sought to identify whether observational learning of play skills can be enhanced through the use of such pairing procedures. Stimulus pairing was applied in this study by pairing typically developing peers with preferred tangibles (edibles, toys, etc.) and activities. Following preference assessments, each child with autism was paired with a typically developing peer who possessed primary reinforcers. Data was collected on the number and quality of social interactions between the children with autism and their peers across a series of ten 90-minute play sessions. The duration of time spent on activities initiated by children with autism was also examined. Findings for one particular play group participant, Caitlyn, were analyzed to see if there were any significant changes in her peer play behaviors.

Although Caitlyn did not engage in any independent peer approaches of requests during the first nine sessions of the play group, on the tenth session she spent nearly half the play group time engaged with peers in activities she initiated. Implications of the findings and recommendations for future research are discussed. (Contains 1 figure and 2 tables.)

UR - <http://search.proquest.com/docview/61970216?accountid=14701>

ER -

TY - JOUR

ID - 2006

T1 - Language Outcome in Autism: Randomized Comparison of Joint Attention and Play Interventions

A1 - Kasari,Connie

A1 - Paparella,Tanya

A1 - Freeman,Stephanny

A1 - Jahromi,Laudan B.

Y1 - 2008/02//

KW - ERIC

KW - Unsupervised Play Addition

KW - ERIC,Current Index to Journals in Education (CIJE)

KW - Early Childhood Education

KW - Preschool Education

KW - Comparative Analysis

KW - Control Groups

KW - Language Acquisition

KW - Play

KW - Expressive Language

KW - Intervention

KW - Preschool Children

KW - Attention

KW - Autism

RP - NOT IN FILE

SP - 125

EP - 137

JF - Journal of Consulting and Clinical Psychology

VL - 76

IS - 1

PB - American Psychological Association. Journals Department, 750 First Street NE, Washington, DC 20002-4242.

N2 - This study reports results of a randomized controlled trial aimed at joint attention (JA) and symbolic play (SP) in preschool children with autism, with prediction to language outcome 12 months later. Participants were 58 children (46 boys) with autism between 3 and 4 years of age. Children were randomized to a JA intervention, an SP intervention, or control group. Interventions were conducted 30 min daily for 5-6 weeks. Assessments of JA skills, SP skills, mother-child interactions, and language development were collected at 4 time points: pre- and postintervention and 6 and 12 months postintervention by independent testers. Results indicate that expressive language gains were greater for both treatment groups compared with the control group, and results could not be explained by differences in other interventions in which children participated. For children beginning treatment with the lowest language levels, the JA intervention improved language outcome significantly more than did the SP or control interventions. These findings suggest clinically significant benefits of actively treating JA and SP skills in young children with autism

SN - 0022-006X, 0022-006X

UR - <http://search.proquest.com/docview/61964798?accountid=14701>

L2 - [http://sfx.scholarsportal.info/ottawa?url\\_ver=Z39.88-](http://sfx.scholarsportal.info/ottawa?url_ver=Z39.88-)

2004&rft\_val\_fmt=info:ofi/fmt:kev:mtx:journal&genre=article&sid=ProQ:ProQ%3Aericshell&atitle=Language+Outcome+in+Autism%3A+Randomized+Comparison+of+Joint+Attention+and+Play+Interventions&title=Journal+of+Consulting+and+Clinical+Psychology&issn=0022006X&date=1996-01-

01&volume=&issue=&spage=125&au=Saracho%2C+Olivia+N.&isbn=&jtitle=&bttitle=Preschool+Children%27s+Cognitive+Styles+and+Play+Behaviors.&rft\_id=info:eric/EJ533033

ER -

TY - JOUR

ID - 2007

T1 - Development of Symbolic Play through the Use of Virtual Reality Tools in Children with Autistic Spectrum Disorders: Two Case Studies

A1 - Herrera, Gerardo

A1 - Alcantud, Francisco

A1 - Jordan, Rita

A1 - Blanquer, Amparo

A1 - Labajo, Gabriel

A1 - De Pablo, Cristina

Y1 - 2008///

KW - ERIC

KW - Unsupervised Play Addition

KW - ERIC, Current Index to Journals in Education (CIJE)

KW - Imagination

KW - Computer Simulation

KW - Play

KW - Case Studies

KW - Pervasive Developmental Disorders

KW - Intervention

KW - CHILDREN

KW - Autism

KW - Teaching Methods

RP - NOT IN FILE

SP - 143

EP - 157

JF - Autism: The International Journal of Research and Practice

VL - 12

IS - 2

PB - SAGE Publications. 2455 Teller Road, Thousand Oaks, CA 91320.

N2 - Difficulties in understanding symbolism have been documented as characteristic of autistic spectrum disorders (ASDs). In general, virtual reality (VR) environments offer a set of potential advantages for educational intervention in ASD. In particular, VR offers the advantage, for teaching pretend play and for understanding imagination, of it being possible to show these imaginary transformations explicitly. This article reports two case studies of children with autism (aged 8:6 and 15:7, both male), examining the effectiveness of using a VR tool specifically designed to work on teaching understanding of pretend play. The results, confirmed by independent observers, showed a significant advance in pretend play abilities after the intervention period in both participants, and a high degree of generalization of the acquired teaching in one of them. (Contains 4 figures and 3 tables.)

SN - 1362-3613, 1362-3613

UR - <http://search.proquest.com/docview/61956596?accountid=14701>

L2 - [http://sfx.scholarsportal.info/ottawa?url\\_ver=Z39.88-](http://sfx.scholarsportal.info/ottawa?url_ver=Z39.88-)

2004&rft\_val\_fmt=info:ofi/fmt:kev:mtx:journal&genre=article&sid=ProQ:ProQ%3Aericshell&atitle=Development+of+Symbolic+Play+through+the+Use+of+Virtual+Reality+Tools+in+Children+with+Autistic+Spectrum+Disorders%3A+Two+Case+Studies&title=Autism%3A+The+International+Journal+of+Research+and+Practice&issn=13623613&date=2008-01-

01&volume=12&issue=2&page=143&au=Herrera%2C+Gerardo%3BAlcantud%2C+Francisco%3BJordan%2C+Rita%3BBlanquer%2C+Amparo%3BLabajo%2C+Gabriel%3BDe+Pablo%2C+Cristina&isbn=&jtitle=Autism%3A+The+International+Journal+of+Research+and+Practice&bttitle=&rft\_id=info:eric/EJ786682

ER -

TY - JOUR

ID - 2008

T1 - Infant and Mother-Infant Play and the Presence of the Television

A1 - Masur,Elise Frank

A1 - Flynn,Valerie

Y1 - 2008///

KW - ERIC

KW - Unsupervised Play Addition

KW - ERIC,Current Index to Journals in Education (CIJE)

KW - Practitioners

KW - Researchers

KW - Questionnaires

KW - Play

KW - Research Methodology

KW - Parent Child Relationship

KW - Mothers

KW - Television

KW - Toys

KW - Infants

RP - NOT IN FILE

SP - 76

EP - 83

JF - Journal of Applied Developmental Psychology

VL - 29

IS - 1

PB - Elsevier. 6277 Sea Harbor Drive, Orlando, FL 32887-4800.

N2 - Forty-eight middle-class mothers answered questionnaires about their 11-through 18-month-old infants' typical television watching and interest, the frequency and duration of their independent play with toys and dyadic play with and without toys, and whether the television was typically on or not on in the room at the time. Mothers reported that most infants had little interest in and spent little time actively watching television. However, mothers reported the television was typically turned on in the room at least half the time during independent play with toys for 44% of infants and during dyadic play with toys for 53% of infants. These findings provide evidence relevant to researchers' and practitioners' concerns regarding the potential negative impact of television's presence on infant development, mother-child interaction, and the ecological validity of observational research methods involving play or interactions in the absence of a television

SN - 0193-3973, 0193-3973

UR - <http://search.proquest.com/docview/61961676?accountid=14701>

L2 - [http://sfx.scholarsportal.info/ottawa?url\\_ver=Z39.88-](http://sfx.scholarsportal.info/ottawa?url_ver=Z39.88-)

2004&rft\_val\_fmt=info:ofi/fmt:kev:mtx:journal&genre=unknown&sid=ProQ:ProQ%3Aericshell&atitle=The+Effect+of+Dramatic+Play+on+the+Story+Retellings+of+Second+Grade+Children.&title=&issn=&date=1983-04-

01&volume=&issue=&spage=10&au=Galda%2C+Lee%3BMiller%2C+Michael&isbn=&jtitle=&btittle=&rft\_id=info:eric/ED233812

ER -

TY - JOUR

ID - 2009

T1 - The Bubble-Wrap Generation: Children Growing Up in Walled Gardens

A1 - Malone, Karen

Y1 - 2007/09//

KW - ERIC

KW - Unsupervised Play Addition

KW - Australia

KW - Germany

KW - ERIC, Current Index to Journals in Education (CIJE)

KW - Early Childhood Education

KW - Elementary Education

KW - Middle Class

KW - Environmental Education

KW - Play

KW - Competence

KW - Anxiety

KW - Safety

KW - CHILDREN

KW - Personality Traits

KW - Parenting Styles

KW - Physical Environment

KW - Foreign Countries

KW - Child Development

KW - Freedom

RP - NOT IN FILE

SP - 513

EP - 527

JF - Environmental Education Research

VL - 13

IS - 4

PB - Routledge, 325 Chestnut Street Suite 800, Philadelphia, PA 19106.

N2 - Children in middle class Australia, and many western countries around the world experience restricted opportunities to engage in free play in their neighbourhood streets and parks. The impact of this has been a drastic decrease in children's independent mobility and environmental play. Recent research has focused on the physical environment of neighbourhoods' in an attempt to understand how they might be designed to encourage children's play and increase their environmental learning. This paper explores these same issues but from a

different perspective. That is, to explain some of the changes in childhood environmental behaviours I explore children and parent relationships, in particular, the phenomena of 'bubble-wrapping' children to appease the anxieties of some middle class parents. I acknowledge when making these claims that parenting is a complex and highly individual enterprise with many variables, therefore this paper is only seeking to draw attention to a broad pattern of behaviour of a select group within society. I will conclude with an overview of some of the key attributes and competencies that are being lost when children lack independent mobility in their neighbourhoods and will subsequently argue why opening the front gates of our middle class suburbs is important to enhance children's environmental learning. (Contains 5 figures and 2 notes.)

SN - 1350-4622, 1350-4622

UR - <http://search.proquest.com/docview/62057431?accountid=14701>

L2 - [http://sfx.scholarsportal.info/ottawa?url\\_ver=Z39.88-](http://sfx.scholarsportal.info/ottawa?url_ver=Z39.88-)

2004&rft\_val\_fmt=info:ofi/fmt:kev:mtx:journal&genre=article&sid=ProQ:ProQ%3Aericshell&atitle=The+Bubble-

Wrap+Generation%3A+Children+Growing+Up+in+Walled+Gardens&title=Environmental+Education+Research&issn=13504622&date=2007-09-

01&volume=13&issue=4&spage=513&au=Malone%2C+Karen&isbn=&jtitle=Environmental+Education+Research&bttitle=&rft\_id=info:eric/EJ775883

ER -

TY - JOUR

ID - 2010

T1 - Effects of an Individual Work System on the Independent Functioning of Students with Autism

A1 - Hume,Kara

A1 - Odom,Sam

Y1 - 2007/07//

KW - ERIC

KW - Unsupervised Play Addition

KW - ERIC,Current Index to Journals in Education (CIJE)

KW - Instructional Effectiveness

KW - Play

KW - Intervention

KW - Outcomes of Treatment

KW - Educational Environment

KW - Independent Study

KW - Visual Aids

KW - Cues

KW - Work Environment

KW - Autism

KW - Time on Task

KW - Teaching Methods

RP - NOT IN FILE

SP - 1166

EP - 1180

JF - Journal of Autism and Developmental Disorders

VL - 37

IS - 6

PB - Springer. 233 Spring Street, New York, NY 10013.

N2 - This study examined the effects of a work system on the independent work and play skills of students with autism. Work systems, an element of structured teaching developed by Division TEACCH, are organized sets of visual information that inform a student about participation in work or play areas. A single subject withdrawal of treatment design, with replications across three participants, was used to assess the on-task behavior and work completion skills of the students in classroom and employment settings as a result of the intervention. Observational data indicated that all students showed increases in on-task behavior, increases in the number of tasks completed or play materials utilized, and reduction of teacher prompts. The results were maintained

through the 1-month follow-up

SN - 0162-3257, 0162-3257

UR - <http://search.proquest.com/docview/62048787?accountid=14701>

L2 - [http://sfx.scholarsportal.info/ottawa?url\\_ver=Z39.88-](http://sfx.scholarsportal.info/ottawa?url_ver=Z39.88-)

2004&rft\_val\_fmt=info:ofi/fmt:kev:mtx:journal&genre=article&sid=ProQ:ProQ%3Aericshell&atitle=Effects+of+an+Individual+Work+System+on+the+Independent+Functioning+of+Students+with+Autism&title=Journal+of+Autism+and+Developmental+Disorders&issn=01623257&date=2007-07-

01&volume=37&issue=6&spage=1166&au=Hume%2C+Kara%3BOdom%2C+Sam&isbn=&jtitle=Journal+of+Autism+and+Developmental+Disorders&bttitle=&rft\_id=info:eric/EJ767554

ER -

TY - JOUR

ID - 2011

T1 - Current Fear of Crime, Sense of Community, and Loneliness in Italian Adolescents: The Role of Autonomous Mobility and Play during Childhood

A1 - Prezza, Miretta

A1 - Pacilli, Maria Giuseppina

Y1 - 2007/03//

KW - ERIC

KW - Unsupervised Play Addition

KW - Italy

KW - UCLA Loneliness Scale

KW - ERIC, Current Index to Journals in Education (CIJE)

KW - community

KW - Play

KW - Crime

KW - Mobility

KW - Gender Differences

KW - Fear

KW - Structural Equation Models

KW - CHILDREN

KW - Foreign Countries

KW - Psychological Patterns

KW - Personal Autonomy

KW - Adolescents

KW - Predictor Variables

RP - NOT IN FILE

SP - 151

EP - 170

JF - Journal of Community Psychology

VL - 35

IS - 2

PB - John Wiley & Sons, Subscription Department, 111 River Street, Hoboken, NJ 07030-5774.

N2 - A structural equation model was used to examine the role of autonomous mobility and play in public and semipublic places in childhood to predict adolescents' sense of community, fear of crime, and, through the mediation of these two last psychosocial factors, feelings of loneliness. Participants included 789 Italian students (469 females and 320 males; mean age 16.62, SD = 0.69). The instruments used were the Italian Sense of Community Scale, the Neighborhood Relations Scale, and the UCLA Loneliness Scale. A questionnaire was also administered to investigate the adolescents' current fear of crime and their autonomous mobility when they were children by asking them to recall their play habits and independent mobility at 8-10 years of age. The structural equation model proved satisfying: Higher autonomous mobility and higher use of public places for play in childhood predicted less intense fear of crime and a stronger sense of community in adolescence. Furthermore, a better relationship with community predicted less pervasive feelings of loneliness. The simultaneous multigroup analysis showed that the final model was comparable for both girls and boys with only one difference. (Contains 3 tables, 9 footnotes and 2 figures.)

SN - 0090-4392, 0090-4392

UR - <http://search.proquest.com/docview/968117717?accountid=14701>



L2 - [http://sfx.scholarsportal.info/ottawa?url\\_ver=Z39.88-2004&rft\\_val\\_fmt=info:ofi/fmt:kev:mtx:journal&genre=article&sid=ProQ:ProQ%3Aericshell&atitle=Current+Fear+of+Crime%2C+Sense+of+Community%2C+and+Loneliness+in+Italian+Adolescents%3A+The+Role+of+Autonomous+Mobility+and+Play+during+Childhood&title=Journal+of+Community+Psychology&issn=00904392&date=2007-03-01&volume=35&issue=2&spage=151&au=Prezza%2C+Miretta%3BPacilli%2C+Maria+Giuseppina&isbn=&jtitle=Journal+of+Community+Psychology&bttitle=&rft\\_id=info:eric/EJ958157](http://sfx.scholarsportal.info/ottawa?url_ver=Z39.88-2004&rft_val_fmt=info:ofi/fmt:kev:mtx:journal&genre=article&sid=ProQ:ProQ%3Aericshell&atitle=Current+Fear+of+Crime%2C+Sense+of+Community%2C+and+Loneliness+in+Italian+Adolescents%3A+The+Role+of+Autonomous+Mobility+and+Play+during+Childhood&title=Journal+of+Community+Psychology&issn=00904392&date=2007-03-01&volume=35&issue=2&spage=151&au=Prezza%2C+Miretta%3BPacilli%2C+Maria+Giuseppina&isbn=&jtitle=Journal+of+Community+Psychology&bttitle=&rft_id=info:eric/EJ958157)  
ER -

TY - JOUR

ID - 2012

T1 - A Pilot Study of the Effects of a Social-Pragmatic Intervention on the Communication and Symbolic Play of Children with Autism

A1 - Keen, Deb

A1 - Rodger, Sylvia

A1 - Doussin, Kim

A1 - Braithwaite, Michelle

Y1 - 2007///

KW - ERIC

KW - Unsupervised Play Addition

KW - ERIC, Current Index to Journals in Education (CIJE)

KW - Program Effectiveness

KW - Measures (Individuals)

KW - Play

KW - Young Children

KW - Interpersonal Competence

KW - Early Intervention

KW - Stress Variables

KW - Autism

KW - Communication Skills

RP - NOT IN FILE

SP - 63

EP - 71

JF - Autism: The International Journal of Research & Practice

VL - 11

IS - 1

PB - SAGE Publications. 2455 Teller Road, Thousand Oaks, CA 91320.

N2 - The acquisition of social communication skills is a major challenge faced by children with autism. This pilot study investigated the effects of the Stronger Families Project, a social-pragmatic intervention, on the communication and symbolic abilities of 16 children aged 2-4 years with autism. Standardized measures of the child's communication and symbolic behaviour were conducted by independent observers at a university clinic pre and post-intervention, and parents were interviewed to determine the impact of variables such as maternal stress and competence on the child's social communication. Changes in some communication and symbolic behaviours occurred following the Stronger Families Project intervention according to parent report. However, improvements based on ratings by independent observers were not significant. Results are discussed in relation to the assessment of changes in the social communication and symbolic play of children with autism following intervention using clinical observation and parent report. (Contains 2 tables.)

SN - 1362-3613, 1362-3613

UR - <http://search.proquest.com/docview/62040416?accountid=14701>

L2 - [http://sfx.scholarsportal.info/ottawa?url\\_ver=Z39.88-2004&rft\\_val\\_fmt=info:ofi/fmt:kev:mtx:journal&genre=article&sid=ProQ:ProQ%3Aericshell&atitle=A+Pilot+Study+of+the+Effects+of+a+Social-Pragmatic+Intervention+on+the+Communication+and+Symbolic+Play+of+Children+with+Autism&title=Autism%3A+The+International+Journal+of+Research+%26+Practice&issn=13623613&date=2007-01-01&volume=11&issue=1&spage=63&au=Keen%2C+Deb%3BRodger%2C+Sylvia%3BDoussin%2C+Kim%3B](http://sfx.scholarsportal.info/ottawa?url_ver=Z39.88-2004&rft_val_fmt=info:ofi/fmt:kev:mtx:journal&genre=article&sid=ProQ:ProQ%3Aericshell&atitle=A+Pilot+Study+of+the+Effects+of+a+Social-Pragmatic+Intervention+on+the+Communication+and+Symbolic+Play+of+Children+with+Autism&title=Autism%3A+The+International+Journal+of+Research+%26+Practice&issn=13623613&date=2007-01-01&volume=11&issue=1&spage=63&au=Keen%2C+Deb%3BRodger%2C+Sylvia%3BDoussin%2C+Kim%3B)

L2 - [http://sfx.scholarsportal.info/ottawa?url\\_ver=Z39.88-2004&rft\\_val\\_fmt=info:ofi/fmt:kev:mtx:journal&genre=article&sid=ProQ:ProQ%3Aericshell&atitle=A+Pilot+Study+of+the+Effects+of+a+Social-Pragmatic+Intervention+on+the+Communication+and+Symbolic+Play+of+Children+with+Autism&title=Autism%3A+The+International+Journal+of+Research+%26+Practice&issn=13623613&date=2007-01-01&volume=11&issue=1&spage=63&au=Keen%2C+Deb%3BRodger%2C+Sylvia%3BDoussin%2C+Kim%3B](http://sfx.scholarsportal.info/ottawa?url_ver=Z39.88-2004&rft_val_fmt=info:ofi/fmt:kev:mtx:journal&genre=article&sid=ProQ:ProQ%3Aericshell&atitle=A+Pilot+Study+of+the+Effects+of+a+Social-Pragmatic+Intervention+on+the+Communication+and+Symbolic+Play+of+Children+with+Autism&title=Autism%3A+The+International+Journal+of+Research+%26+Practice&issn=13623613&date=2007-01-01&volume=11&issue=1&spage=63&au=Keen%2C+Deb%3BRodger%2C+Sylvia%3BDoussin%2C+Kim%3B)

L2 - [http://sfx.scholarsportal.info/ottawa?url\\_ver=Z39.88-2004&rft\\_val\\_fmt=info:ofi/fmt:kev:mtx:journal&genre=article&sid=ProQ:ProQ%3Aericshell&atitle=A+Pilot+Study+of+the+Effects+of+a+Social-Pragmatic+Intervention+on+the+Communication+and+Symbolic+Play+of+Children+with+Autism&title=Autism%3A+The+International+Journal+of+Research+%26+Practice&issn=13623613&date=2007-01-01&volume=11&issue=1&spage=63&au=Keen%2C+Deb%3BRodger%2C+Sylvia%3BDoussin%2C+Kim%3B](http://sfx.scholarsportal.info/ottawa?url_ver=Z39.88-2004&rft_val_fmt=info:ofi/fmt:kev:mtx:journal&genre=article&sid=ProQ:ProQ%3Aericshell&atitle=A+Pilot+Study+of+the+Effects+of+a+Social-Pragmatic+Intervention+on+the+Communication+and+Symbolic+Play+of+Children+with+Autism&title=Autism%3A+The+International+Journal+of+Research+%26+Practice&issn=13623613&date=2007-01-01&volume=11&issue=1&spage=63&au=Keen%2C+Deb%3BRodger%2C+Sylvia%3BDoussin%2C+Kim%3B)

Braithwaite%2C+Michelle&isbn=&jtitle=Autism%3A+The+International+Journal+of+Research+%26+Practice  
&bttitle=&rft\_id=info:eric/EJ747743  
ER -

TY - JOUR

ID - 2013

T1 - Using Video Modeling for Generalizing Toy Play in Children with Autism

A1 - Paterson,Claire R.

A1 - Arco,Lucius

Y1 - 2007///

KW - ERIC

KW - Unsupervised Play Addition

KW - Australia

KW - ERIC,Current Index to Journals in Education (CIJE)

KW - Elementary Education

KW - Elementary School Students

KW - Instructional Effectiveness

KW - Play

KW - MALES

KW - Videotape Recordings

KW - Correlation

KW - CHILDREN

KW - Verbal Communication

KW - Foreign Countries

KW - Toys

KW - Autism

KW - Teaching Methods

KW - Modeling (Psychology)

RP - NOT IN FILE

SP - 660

EP - 681

JF - Behavior Modification

VL - 31

IS - 5

PB - SAGE Publications. 2455 Teller Road, Thousand Oaks, CA 91320.

N2 - The present study examined effects of video modeling on generalized independent toy play of two boys with autism. Appropriate and repetitive verbal and motor play were measured, and intermeasure relationships were examined. Two single-participant experiments with multiple baselines and withdrawals across toy play were used. One boy was presented with three physically unrelated toys, whereas the other was presented with three related toys. Video modeling produced increases in appropriate play and decreases in repetitive play, but generalized play was observed only with the related toys. Generalization may have resulted from variables including the toys' common physical characteristics and natural reinforcing properties and the increased correspondence between verbal and motor play. (Contains 3 tables and 4 figures.)

SN - 0145-4455, 0145-4455

UR - <http://search.proquest.com/docview/62048715?accountid=14701>

L2 - [http://sfx.scholarsportal.info/ottawa?url\\_ver=Z39.88-](http://sfx.scholarsportal.info/ottawa?url_ver=Z39.88-)

2004&rft\_val\_fmt=info:ofi/fmt:kev:mtx:journal&genre=article&sid=ProQ:ProQ%3Aericshell&atitle=Using+Vi  
deo+Modeling+for+Generalizing+Toy+Play+in+Children+with+Autism&title=Behavior+Modification&issn=0  
1454455&date=2007-01-

01&volume=31&issue=5&spage=660&au=Paterson%2C+Claire+R.%3BArco%2C+Lucius&isbn=&jtitle=Beha  
vior+Modification&bttitle=&rft\_id=info:eric/EJ771584

ER -

TY - JOUR

ID - 2014

T1 - Making Play Happen: Ideas for Mounting a Campaign to Increase Healthy Play in Your Community

A1 - Oliver, Susan J.

A1 - Klugman, Edgar

Y1 - 2007///

KW - ERIC

KW - Unsupervised Play Addition

KW - ERIC, Current Index to Journals in Education (CIJE)

KW - Early Childhood Education

KW - Play

KW - Young Children

KW - Interpersonal Competence

KW - Goal Orientation

KW - Child Development

KW - Social Development

KW - Cooperative Planning

KW - Creativity

KW - Outcome Based Education

KW - Emotional Development

KW - Classroom Techniques

RP - NOT IN FILE

SP - 34

EP - 37

JF - Exchange: The Early Childhood Leaders' Magazine Since 1978

VL - 176

PB - Exchange Press, Inc. P.O. Box 3249, Redmond, WA 98073-3249. Tel: 800-221-2864; Fax: 425-867-5217; e-mail: [info@ChildCareExchange.com](mailto:info@ChildCareExchange.com); Web site: [www.childcareexchange.com](http://www.childcareexchange.com)

N2 - Much has been written in recent years about early childhood play, documenting its role in healthy development, detailing the risks children face if they do not have access to play, and offering implementation tips to educators to use in communicating about play to administrators and parents. For those ready to move forward in their own communities to impact change that will ensure that today's children have sufficient access to healthy play, Oliver and Klugman discuss a number of basic steps: (1) Conceptualizing a local campaign on play to raise parental and preschool awareness, increase community safety for unsupervised or lightly supervised play, set priorities and identify best chances for success; (2) Joining forces with those who can bring understanding of the target audience, attention, leadership, necessary skill sets and funding to the project; (3) Establishing clear campaign objectives with defined goals, realistic timeline and measurement tools; (4) Doing one's homework by identifying potential competition, advocates/detractors, developing counterpoint to anticipated "anti" positions and compiling easy-to-understand statistics from well-defined inquiries; (5) Creating message points that attract attention, establish the problem, provide the solution and issue a call to action and (6) Developing an execution and implementation plan, based on available media and events best suited to the target community. Oliver and Klugman acknowledge that the challenge to understand how much learning happens through play and to convince parents, administrators, policy makers and others to make play as important as mathematics, literacy and science is large. The authors balance this argument by pointing out the payoffs for children, such as acquiring the social and emotional skills that help make them school-ready. Children also maintain their natural motivation to be engaged, curious learners in an outcome-oriented educational context

SN - 0164-8527, 0164-8527

UR - <http://search.proquest.com/docview/62042419?accountid=14701>

L2 - [http://sfx.scholarsportal.info/ottawa?url\\_ver=Z39.88-](http://sfx.scholarsportal.info/ottawa?url_ver=Z39.88-)

[2004&rft\\_val\\_fmt=info:ofi/fmt:kev:mtx:journal&genre=article&sid=ProQ:ProQ%3Aericshell&atitle=Making+Play+Happen%3A+Ideas+for+Mounting+a+Campaign+to+Increase+Healthy+Play+in+Your+Community&title=Exchange%3A+The+Early+Childhood+Leaders%27+Magazine+Since+1978&issn=01648527&date=2007-01-](http://sfx.scholarsportal.info/ottawa?url_ver=Z39.88-2004&rft_val_fmt=info:ofi/fmt:kev:mtx:journal&genre=article&sid=ProQ:ProQ%3Aericshell&atitle=Making+Play+Happen%3A+Ideas+for+Mounting+a+Campaign+to+Increase+Healthy+Play+in+Your+Community&title=Exchange%3A+The+Early+Childhood+Leaders%27+Magazine+Since+1978&issn=01648527&date=2007-01-01)

[01-01&volume=176&issue=&spage=34&au=Oliver%2C+Susan+J.%3BKlugman%2C+Edgar&isbn=&jtitle=Exchange%3A+The+Early+Childhood+Leaders%27+Magazine+Since+1978&bttitle=&rft\\_id=info:eric/EJ769528](http://sfx.scholarsportal.info/ottawa?url_ver=Z39.88-2004&rft_val_fmt=info:ofi/fmt:kev:mtx:journal&genre=article&sid=ProQ:ProQ%3Aericshell&atitle=Making+Play+Happen%3A+Ideas+for+Mounting+a+Campaign+to+Increase+Healthy+Play+in+Your+Community&title=Exchange%3A+The+Early+Childhood+Leaders%27+Magazine+Since+1978&issn=01648527&date=2007-01-01&volume=176&issue=&spage=34&au=Oliver%2C+Susan+J.%3BKlugman%2C+Edgar&isbn=&jtitle=Exchange%3A+The+Early+Childhood+Leaders%27+Magazine+Since+1978&bttitle=&rft_id=info:eric/EJ769528)

ER -

TY - JOUR

ID - 2016

T1 - A Longitudinal Study of Belief and Desire State Discourse during Mother-Child Play and Later False Belief Understanding

A1 - Symons, Douglas K.

A1 - Fossum, Kristin Lee

A1 - Collins, B.T.

Y1 - 2006/11//

KW - ERIC

KW - Unsupervised Play Addition

KW - ERIC, Current Index to Journals in Education (CIJE)

KW - Cognitive Development

KW - Play

KW - Mothers

KW - Socioeconomic Status

KW - Correlation

KW - Longitudinal Studies

KW - Discourse Analysis

KW - Cognitive Processes

KW - theory of mind

KW - Parent Child Relationship

KW - Role

KW - Child Language

RP - NOT IN FILE

SP - 676

EP - 692

JF - Social Development

VL - 15

IS - 4

PB - Wiley-Blackwell. 350 Main Street, Malden, MA 02148.

N2 - There is considerable interest in the role of mental state language in theory of mind development. This study examines cognitive and desire state discourse of 43 mothers during play interactions with their two-year-old children and theory of mind as indicated by a battery of false belief tasks around the age of five. Desire state comments of mothers during free play which were appropriate to the conversational context were significantly related to children's later theory of mind, and this relation was independent of other confounding variables, including a home-based measure of maternal sensitivity, and socio-economic status, and an estimate of child language. The child's desire state language was concurrently related to the mother's desire state language used appropriately, and the child's cognitive state language was related to the mother's appropriate cognitive state language. Although cognitive state language was not predictive of later theory of mind, this may be because this kind of language plays a later role in theory of mind development

SN - 0961-205X, 0961-205X

UR - <http://search.proquest.com/docview/964170536?accountid=14701>

L2 - [http://sfx.scholarsportal.info/ottawa?url\\_ver=Z39.88-](http://sfx.scholarsportal.info/ottawa?url_ver=Z39.88-)

2004&rft\_val\_fmt=info:ofi/fmt:kev:mtx:journal&genre=article&sid=ProQ:ProQ%3Aericshell&atitle=A+Longitudinal+Study+of+Belief+and+Desire+State+Discourse+during+Mother-

Child+Play+and+Later+False+Belief+Understanding&title=Social+Development&issn=0961205X&date=2006

-11-01&volume=15&issue=4&spage=676&au=Symons%2C+Douglas+K.%3BFossum%2C+Kristin-

Lee+M.%3BCollins%2C+B.+T.&isbn=&jtitle=Social+Development&btitle=&rft\_id=info:eric/EJ942069

ER -

TY - JOUR

ID - 2017

T1 - Joint Attention and Symbolic Play in Young Children with Autism: A Randomized Controlled Intervention Study

A1 - Kasari, Connie

A1 - Freeman, Stephanny

A1 - Paparella, Tanya

Y1 - 2006/06//

KW - ERIC  
 KW - Unsupervised Play Addition  
 KW - ERIC, Current Index to Journals in Education (CIJE)  
 KW - Program Effectiveness  
 KW - Play  
 KW - Control Groups  
 KW - Young Children  
 KW - Parent Child Relationship  
 KW - Mothers  
 KW - Early Intervention  
 KW - Interaction Process Analysis  
 KW - Autism  
 KW - Outcomes of Treatment  
 RP - NOT IN FILE  
 SP - 611  
 EP - 620  
 JF - Journal of Child Psychology and Psychiatry  
 VL - 47  
 IS - 6  
 PB - Wiley-Blackwell. 350 Main Street, Malden, MA 02148.  
 N2 - Background: Delays and deficits in joint attention and symbolic play constitute two important developmental problems in young children with autism. These areas of deficit have been well studied in autism but have rarely been the focus of treatment efforts (see Kasari, Freeman, & Paparella, 2001). In this study, we examine the efficacy of targeted interventions of joint attention and symbolic play. Methods: Participants were 58 children with autism aged 3 and 4 years (46 boys). Children were randomized to a joint attention intervention, a symbolic play intervention, or control group. Interventions were conducted 30 minutes daily for 5-6 weeks. Both structured assessments of joint attention and play skills and mother-child interactions were collected pre and post intervention by independent assessors. Results: Results indicate that both intervention groups improved significantly over the control group on certain behaviors. Children in the joint attention intervention initiated significantly more showing and responsiveness to joint attention on the structured joint attention assessment and more child-initiated joint attention in the mother-child interaction. The children in the play group showed more diverse types of symbolic play in interaction with their mothers and higher play levels on both the play assessment and in interaction with their mothers. Conclusions: This randomized controlled trial provides promising data on the specificity and generalizability of joint attention and play interventions for young children with autism. Future studies need to examine the long-term effects of these early interventions on children's development  
 SN - 0021-9630, 0021-9630  
 UR - <http://search.proquest.com/docview/964185204?accountid=14701>  
 L2 - [http://sfx.scholarsportal.info/ottawa?url\\_ver=Z39.88-2004&rft\\_val\\_fmt=info:ofi/fmt:kev:mtx:journal&genre=article&sid=ProQ:ProQ%3Aericshell&atitle=Joint+Attention+and+Symbolic+Play+in+Young+Children+with+Autism%3A+A+Randomized+Controlled+Intervention+Study&title=Journal+of+Child+Psychology+and+Psychiatry&issn=00219630&date=2006-06-01&volume=47&issue=6&epage=611&au=Kasari%2C+Connie%3BFreeman%2C+Stephanny%3BPaparella%2C+Tanya&isbn=&jtitle=Journal+of+Child+Psychology+and+Psychiatry&bttitle=&rft\\_id=info:eric/EJ950297](http://sfx.scholarsportal.info/ottawa?url_ver=Z39.88-2004&rft_val_fmt=info:ofi/fmt:kev:mtx:journal&genre=article&sid=ProQ:ProQ%3Aericshell&atitle=Joint+Attention+and+Symbolic+Play+in+Young+Children+with+Autism%3A+A+Randomized+Controlled+Intervention+Study&title=Journal+of+Child+Psychology+and+Psychiatry&issn=00219630&date=2006-06-01&volume=47&issue=6&epage=611&au=Kasari%2C+Connie%3BFreeman%2C+Stephanny%3BPaparella%2C+Tanya&isbn=&jtitle=Journal+of+Child+Psychology+and+Psychiatry&bttitle=&rft_id=info:eric/EJ950297)  
 ER -  
  
 TY - JOUR  
 ID - 2019  
 T1 - Children's Categorisation of Play and Learning Based on Social Context  
 A1 - Howard, Justine  
 A1 - Jenvey, Vickii  
 A1 - Hill, Carly  
 Y1 - 2006/05//  
 KW - ERIC  
 KW - Unsupervised Play Addition  
 KW - Australia

KW - ERIC,Current Index to Journals in Education (CIJE)

KW - Preschool Education

KW - Context Effect

KW - Play

KW - Young Children

KW - Early Childhood Education

KW - Teacher Attendance

KW - Association Measures

KW - Peer Relationship

KW - Group Activities

KW - Foreign Countries

KW - Cues

KW - Pictorial Stimuli

KW - Attitude Measures

KW - Social Environment

RP - NOT IN FILE

SP - 15

JF - Early Child Development and Care

VL - 176

IS - 3

PB - Customer Services for Taylor & Francis Group Journals, 325 Chestnut Street, Suite 800, Philadelphia, PA 19106.

N2 - While much time has been spent deliberating about the definition of play, little emphasis has been placed on what children themselves perceive as play. The aim of the present study was to examine social context as a cue for children's perceptions of play and learning. Ninety-two children aged between four and six years (mean four years nine months) participated in the study and completed the Activity Apperception Story Procedure. Children were asked to sort photographic stimuli into those they believed depicted play/not play and learning/not learning. Each of the stimuli were identified by independent raters as containing one of the following social cues; teacher absence (solitary activity, parallel activity or cooperative activity) or teacher presence (teacher involved activity or teacher directed activity). Findings revealed that children associated teacher absence with play. More specifically, children made links between play and the presence of peers (parallel and cooperative activity). Findings are discussed in relation to play in the early years curriculum, differences in children's early educational experiences and the importance of understanding children's perceptions of play

SN - 0300-4430, 0300-4430

UR - <http://search.proquest.com/docview/62096949?accountid=14701>

L2 - [http://sfx.scholarsportal.info/ottawa?url\\_ver=Z39.88-](http://sfx.scholarsportal.info/ottawa?url_ver=Z39.88-)

2004&rft\_val\_fmt=info:ofi/fmt:kev:mtx:journal&genre=article&sid=ProQ:ProQ%3Aericshell&atitle=Children%27s+Categorisation+of+Play+and+Learning+Based+on+Social+Context&title=Early+Child+Development+and+Care&issn=03004430&date=2006-05-

01&volume=176&issue=3&spage=15&au=Howard%2C+Justine%3BJenvey%2C+Vickii%3BHill%2C+Carly&isbn=&jtitle=Early+Child+Development+and+Care&btitle=&rft\_id=info:eric/EJ729198

ER -

TY - JOUR

ID - 2021

T1 - Developing Citizenship Through Supervised Play: The Civics Institute of Ireland Playgrounds, 1933-75

A1 - Kernan,Margaret

Y1 - 2005/11//

KW - ERIC

KW - Unsupervised Play Addition

KW - Ireland

KW - ERIC,Current Index to Journals in Education (CIJE)

KW - Play

KW - Foreign Countries

KW - Playgrounds

KW - Citizenship Education

KW - Service Learning

KW - Learning Experience

KW - Intervention

KW - Civics

KW - Interviews

KW - CHILDREN

KW - Teaching Methods

RP - NOT IN FILE

SP - 675

EP - 687

JF - History of Education

VL - 34

IS - 6

PB - Customer Services for Taylor & Francis Group Journals, 325 Chestnut Street, Suite 800, Philadelphia, PA 19106.

N2 - Prompted by a concern regarding the large numbers of unsupervised children playing on the streets of Dublin in the 1920s and 1930s, the Civics Institute of Ireland (referred to subsequently as the Civics Institute) established 10 playgrounds where children aged between four and 14 years could play after school hours and during school holidays. The playgrounds were open throughout the whole year and the children played under the guidance of play leaders. In the present article it is proposed that the motives of the organizers of the Civics Institute playgrounds can be assessed in terms of their educative social purpose, in addition to the dual need of protecting children from the perceived dangers of the city street, and safeguarding the street from crowds of unsupervised playing children. Once the children were removed from the street, the playgrounds came to be identified by the organizers as a focus of intervention and investment for the future needs of a newly independent Gaelic Ireland. In this regard, it is suggested that it was the intention of the Civics Institute that the pedagogical practices of the playgrounds would work for the development of a spirit of citizenship and patriotism. Thus, supervised play was perceived as the medium by which the particular attitudes and behaviours of good citizenship could be developed. The present article considers the play in the Civics Institute playgrounds as represented by multiple perspectives. These include "the voice of officialdom" represented through the various papers and documents of the Civics Institute such as annual reports, minute books, correspondence, newspaper clippings and accounts of ex-Civics Institute Committee members. Ex-play leaders and assistant play leaders who were able to provide first-hand accounts of the day-to-day pedagogical practice in the playgrounds were also interviewed in the course of conducting the research. The author also had the opportunity of capturing the voice of "the child player", albeit through the memoried childhood of a small number of ex-playground attendees. These first-hand accounts provide an additional dimension in helping to understand the player's experiences in the playgrounds. (Contains 56 footnotes.)

SN - 0046-760X, 0046-760X

UR - <http://search.proquest.com/docview/62154034?accountid=14701>

L2 - [http://sfx.scholarsportal.info/ottawa?url\\_ver=Z39.88-](http://sfx.scholarsportal.info/ottawa?url_ver=Z39.88-)

2004&rft\_val\_fmt=info:ofi/fmt:kev:mtx:journal&genre=article&sid=ProQ:ProQ%3Aericshell&atitle=Developing+Citizenship+Through+Supervised+Play%3A+The+Civics+Institute+of+Ireland+Playgrounds%2C+1933-75&title=History+of+Education&issn=0046760X&date=2005-11-

01&volume=34&issue=6&page=675&au=Kernan%2C+Margaret&isbn=&jtitle=History+of+Education&bttitle=&rft\_id=info:eric/EJ721963

ER -

TY - JOUR

ID - 2022

T1 - The Validity of Head Start Teacher Assistant Report of Children's Peer Play Competencies

A1 - McWayne,Christine

A1 - Sekino,Yumiko

A1 - Fantuzzo,John

Y1 - 2005/03//

KW - ERIC

KW - Unsupervised Play Addition

- KW - Parent Reports  
 KW - ERIC,Current Index to Journals in Education (CIJE)  
 KW - Preschool Teachers  
 KW - Play  
 KW - Academic Achievement  
 KW - Test Validity  
 KW - Urban Schools  
 KW - Correlation  
 KW - Factor Analysis  
 KW - Peer Relationship  
 KW - Teacher Aides  
 KW - Early Intervention  
 KW - Disadvantaged Youth  
 KW - Construct Validity  
 KW - Preschool Children  
 RP - NOT IN FILE  
 SP - 103  
 EP - 120  
 JF - NHSA Dialog  
 VL - 8  
 IS - 1  
 PB - Routledge. , 325 Chestnut Street Suite 800, Philadelphia, PA 19106.  
 N2 - This study examined the validity of teacher assistant report of children's classroom peer play behaviors using the Penn Interactive Peer Play Scale (PIPPS). Participants for the examination of construct validity were 344 urban Head Start children. Exploratory factor analyses resulted in a reliable three-factor solution, corroborating the dimensions of interactive peer play previously found with teacher and parent reports. Factor-matching analyses yielded high congruence between the teacher-assistant structure and the credentialed-teacher and parent structures. Additionally, concurrent validity was demonstrated with a subsample of 270 children by significant relationships found between the PIPPS dimensions and teacher observations of children's classroom learning competencies and an independent assessment of children's early academic success. The results affirm that teacher assistants in Head Start are a reliable and valid source of information on children's interactive, peer play competencies. (Contains 2 tables.)  
 SN - 1524-0754, 1524-0754  
 UR - <http://search.proquest.com/docview/61881351?accountid=14701>  
 L2 - [http://sfx.scholarsportal.info/ottawa?url\\_ver=Z39.88-2004&rft\\_val\\_fmt=info:ofi/fmt:kev:mtx:journal&genre=article&sid=ProQ:ProQ%3Aericshell&atitle=The+Validity+of+Head+Start+Teacher+Assistant+Report+of+Children%27s+Peer+Play+Competencies&title=NHSA+Dialog&issn=15240754&date=2005-03-01&volume=8&issue=1&spage=103&au=McWayne%2C+Christine%3BSekino%2C+Yumiko%3BFantuzzo%2C+John&isbn=&jtitle=NHSA+Dialog&bttitle=&rft\\_id=info:eric/EJ834008](http://sfx.scholarsportal.info/ottawa?url_ver=Z39.88-2004&rft_val_fmt=info:ofi/fmt:kev:mtx:journal&genre=article&sid=ProQ:ProQ%3Aericshell&atitle=The+Validity+of+Head+Start+Teacher+Assistant+Report+of+Children%27s+Peer+Play+Competencies&title=NHSA+Dialog&issn=15240754&date=2005-03-01&volume=8&issue=1&spage=103&au=McWayne%2C+Christine%3BSekino%2C+Yumiko%3BFantuzzo%2C+John&isbn=&jtitle=NHSA+Dialog&bttitle=&rft_id=info:eric/EJ834008)  
 ER -  
 TY - JOUR  
 ID - 2023  
 T1 - Assessing Peer Entry and Play in Preschoolers at Risk for Maladjustment  
 A1 - Brotman,Laurie Miller  
 A1 - Gouley,Kathleen Kiely  
 A1 - Chesir-Teran,Daniel  
 Y1 - 2005///  
 KW - ERIC  
 KW - Unsupervised Play Addition  
 KW - ERIC,Current Index to Journals in Education (CIJE)  
 KW - Preschool Education  
 KW - Evaluation Methods  
 KW - High Risk Students  
 KW - Rating Scales



KW - Play  
 KW - Student Adjustment  
 KW - Parent Child Relationship  
 KW - Psychopathology  
 KW - Preschool Children  
 KW - Psychometrics  
 KW - Antisocial Behavior  
 KW - Peer Relationship  
 RP - NOT IN FILE  
 SP - 671  
 EP - 680  
 JF - Journal of Clinical Child and Adolescent Psychology  
 VL - 34  
 IS - 4  
 PB - Lawrence Erlbaum Associates, , Journal Subscription Department, 10 Industrial Avenue, Mahwah, NJ 07430-2262.  
 N2 - This study evaluated the psychometric properties of an observational rating system for assessing preschoolers' peer entry and play skills: Observed Peer Play in Unfamiliar Settings (OPPUS). Participants were 84 preschoolers at risk for psychopathology. Reliability and concurrent validity are reported. The 30-min paradigm yielded reliable indexes of engaging and disruptive behavior. Adequate interrater reliability and stability were obtained with minimally trained observers. OPPUS scores were related in expected ways to independent observations of disruptive and engaging behavior during parent-child interactions. OPPUS scores were associated with parent-rated self-control and internalizing behaviors. OPPUS scores were associated with parent ratings of play skills for children with school experience and assertiveness for children without school experience. The OPPUS is a useful, brief method for assessing peer entry and play behaviors in preschoolers  
 SN - 1537-4416, 1537-4416  
 UR - <http://search.proquest.com/docview/62147562?accountid=14701>  
 L2 - [http://sfx.scholarsportal.info/ottawa?url\\_ver=Z39.88-2004&rft\\_val\\_fmt=info:ofi/fmt:kev:mtx:journal&genre=article&sid=ProQ:ProQ%3Aericshell&atitle=Assessing+Peer+Entry+and+Play+in+Preschoolers+at+Risk+for+Maladjustment&title=Journal+of+Clinical+Child+and+Adolescent+Psychology&issn=15374416&date=2005-01-01&volume=34&issue=4&spage=671&au=Brotman%2C+Laurie+Miller%3BGouley%2C+Kathleen+Kiely%3BChesir-Teran%2C+Daniel&isbn=&jtitle=Journal+of+Clinical+Child+and+Adolescent+Psychology&btile=&rft\\_id=info:eric/EJ722582](http://sfx.scholarsportal.info/ottawa?url_ver=Z39.88-2004&rft_val_fmt=info:ofi/fmt:kev:mtx:journal&genre=article&sid=ProQ:ProQ%3Aericshell&atitle=Assessing+Peer+Entry+and+Play+in+Preschoolers+at+Risk+for+Maladjustment&title=Journal+of+Clinical+Child+and+Adolescent+Psychology&issn=15374416&date=2005-01-01&volume=34&issue=4&spage=671&au=Brotman%2C+Laurie+Miller%3BGouley%2C+Kathleen+Kiely%3BChesir-Teran%2C+Daniel&isbn=&jtitle=Journal+of+Clinical+Child+and+Adolescent+Psychology&btile=&rft_id=info:eric/EJ722582)  
 ER -  
  
 TY - JOUR  
 ID - 2024  
 T1 - Effects of Punishment and Response-Independent Attention on Severe Problem Behavior and Appropriate Toy Play  
 A1 - Doughty, Shannon S.  
 A1 - Poe, Susannah G.  
 A1 - Anderson, Cynthia M.  
 Y1 - 2005///  
 KW - ERIC  
 KW - Unsupervised Play Addition  
 KW - ERIC, Current Index to Journals in Education (CIJE)  
 KW - Developmental Disabilities  
 KW - Toddlers  
 KW - Play  
 KW - Injuries  
 KW - Punishment  
 KW - MALES  
 KW - Intervention  
 KW - SOCIALIZATION

KW - Behavior Problems  
KW - Self Destructive Behavior  
KW - Reinforcement  
KW - Severe Disabilities  
KW - Toys  
KW - Interpersonal Relationship  
KW - Autism  
RP - NOT IN FILE  
SP - 91  
EP - 98  
JF - Journal of Early and Intensive Behavior Intervention  
VL - 2  
IS - 2  
PB - Joseph Cautilli, Ph.D. & The Behavior Analyst Online Organization. 535 Queen Street, Philadelphia, PA 19147-3220.  
N2 - Problem behavior can interfere with learning, the development of appropriate skills, and socialization in persons with developmental disabilities. In severe cases, problem behavior could result in life-threatening injury. For one 21-month-old participant diagnosed with autism engaging in severe problem behavior for whom reinforcement-based interventions had failed, punishment was implemented. After the efficacy of punishment alone was evaluated, it was implemented concurrent with response-independent attention. Problem behavior was suppressed and appropriate toy play emerged as a function of these combined interventions. Thus, punishment in combination with response-independent attention was an effective intervention for severe, attention-maintained problem behavior. (Contains 1 figure.)  
SN - 1554-4893, 1554-4893  
UR - <http://search.proquest.com/docview/61863434?accountid=14701>  
ER -  
  
TY - JOUR  
ID - 2025  
T1 - Increasing Pretend Toy Play of Toddlers with Disabilities in an Inclusive Setting  
A1 - DiCarlo,Cynthia F.  
A1 - Reid,Dennis H.  
Y1 - 2004///  
KW - ERIC  
KW - Unsupervised Play Addition  
KW - ERIC,Current Index to Journals in Education (CIJE)  
KW - Early Childhood Education  
KW - Toddlers  
KW - Play  
KW - Disabilities  
KW - Toys  
KW - Teaching Methods  
RP - NOT IN FILE  
SP - 197  
JF - Journal of Applied Behavior Analysis  
JA - J Appl.Behav Anal.  
VL - 37  
IS - 2  
PB - Department of Applied Behavioral Science, 1000 Sunnyside Ave., KU, Lawrence, KS 66045-2133.  
N2 - We evaluated a program for increasing pretend toy play of 2-year-old children with disabilities in an inclusive classroom. Classroom personnel implemented the program, which involved choices of classroom centers containing toys that tend to occasion pretend play in toddlers without disabilities, along with prompting and praise. Increases occurred in independent pretend-play rates among all 5 participating toddlers. Results are discussed regarding the importance of promoting toy play of very young children with disabilities that is similar to the type of play of their nondisabled peers, and the need to identify critical program components that are applicable in inclusive settings

SN - 0021-8855, 0021-8855

UR - <http://search.proquest.com/docview/62124650?accountid=14701>

L2 - [http://sfx.scholarsportal.info/ottawa?url\\_ver=Z39.88-](http://sfx.scholarsportal.info/ottawa?url_ver=Z39.88-)

2004&rft\_val\_fmt=info:ofi/fmt:kev:mtx:journal&genre=article&sid=ProQ:ProQ%3Aericshell&atitle=Increasing+Pretend+Toy+Play+of+Toddlers+with+Disabilities+in+an+Inclusive+Setting&title=Journal+of+Applied+Behavior+Analysis&issn=00218855&date=2004-01-

01&volume=37&issue=2&page=197&au=DiCarlo%2C+Cynthia+F.%3BREid%2C+Dennis+H.&isbn=&jtitle=Journal+of+Applied+Behavior+Analysis&bttitle=&rft\_id=info:eric/EJ696378

ER -

TY - JOUR

ID - 2026

T1 - Literacy Is Child's Play: Making Sense in Khwezi Park

A1 - Prinsloo, Mastin

Y1 - 2004///

KW - ERIC

KW - Unsupervised Play Addition

KW - South Africa (Cape Town)

KW - ERIC, Current Index to Journals in Education (CIJE)

KW - Semiotics

KW - Play

KW - Foreign Countries

KW - Emergent Literacy

KW - Ethnography

KW - Games

KW - Creativity

KW - CHILDREN

KW - Literacy Education

KW - Peer Relationship

RP - NOT IN FILE

SP - 291

EP - 304

JF - Language and Education

VL - 18

IS - 4

PB - Multilingual Matters, Frankfurt Lodge, Clevedon Hall, Victoria Road, Clevedon, UK BS21 7HH. Tel: +44 1275-876519; Fax: +44 1275-871673; e-mail: [info@multilingual-matters.com](mailto:info@multilingual-matters.com); Web site:

<http://www.multilingual-matters.com/multi/journals.asp>.

N2 - The paper draws on ethnographic data on children's game-playing in Khwezi Park outside Cape Town.

This unsupervised, child-choreographed play is seen as a site of meaning-making and identity work where children draw on a range of resources and influences to take and make meaning. These resources for semiosis and interaction are multilingual and multi-modal, and are sourced from social domains that are local, regional and global. This site of play is shown to be itself a distinctive domain where these children can mediate and model for each other the semiotics, practices and resources of school, local and popular culture, religion, mass media and home. These resources allow them to experiment as meaning-makers and sign-makers under conditions of peer feedback in a situated context where there is both contained specificity and freedom to innovate. Such sustained peer-play is seen to be a resource for this particular group of children, encouraging them to be inventive and reflexive in developing their sign-making potentials. The children's social semiotic activity is seen as productive of meanings that are seen as both hybrid in their sources, domain-specific and linked to the children's performances in other contexts, particularly that of school-based reading and writing

SN - 0950-0782, 0950-0782

UR - <http://search.proquest.com/docview/62057649?accountid=14701>

L2 - [http://sfx.scholarsportal.info/ottawa?url\\_ver=Z39.88-](http://sfx.scholarsportal.info/ottawa?url_ver=Z39.88-)

2004&rft\_val\_fmt=info:ofi/fmt:kev:mtx:journal&genre=article&sid=ProQ:ProQ%3Aericshell&atitle=Literacy+Is+Child%27s+Play%3A+Making+Sense+in+Khwezi+Park&title=Language+and+Education&issn=09500782&date=2004-01-

01&volume=18&issue=4&spage=291&au=Prinsloo%2C+Mastin&isbn=&jtitle=Language+and+Education&bt  
tle=&rft\_id=info:eric/EJ728274

ER -

TY - JOUR

ID - 2027

T1 - Child Culture, Play and Child Development

A1 - Thyssen,Sven

Y1 - 2003/12//

KW - ERIC

KW - Unsupervised Play Addition

KW - Denmark

KW - ERIC,Current Index to Journals in Education (CIJE)

KW - Early Childhood Education

KW - Context Effect

KW - Foreign Countries

KW - Play

KW - Young Children

KW - Cultural Influences

KW - Child Development

KW - Child Care

KW - Interpersonal Relationship

KW - School Culture

RP - NOT IN FILE

SP - 589

EP - 612

JF - Early Child Development and Care

VL - 173

IS - 6

PB - Routledge. , 325 Chestnut Street Suite 800, Philadelphia, PA 19106.

N2 - The article discusses child development in the context of child life in day care. It traces children's development of an independent, autonomous life and their creation of culture where play is a central feature. The culture produced by the children is analysed on the basis of classical notions of culture. Furthermore the emergence and development of play in the life of the child is traced and the particular way of thinking represented in play is analysed: thinking related to creating drama with pretend figures on a "stage." The potentials for learning inherent in this particular way of thinking are discussed with reference to the child's learning in the context of early instruction. (Contains 5 figures and 1 note.)

SN - 0300-4430, 0300-4430

UR - <http://search.proquest.com/docview/62000545?accountid=14701>

L2 - [http://sfx.scholarsportal.info/ottawa?url\\_ver=Z39.88-](http://sfx.scholarsportal.info/ottawa?url_ver=Z39.88-)

2004&rft\_val\_fmt=info:ofi/fmt:kev:mtx:journal&genre=article&sid=ProQ:ProQ%3Aericshell&atitle=Child+Cu  
lture%2C+Play+and+Child+Development&title=Early+Child+Development+and+Care&issn=03004430&date=  
2003-12-

01&volume=173&issue=6&spage=589&au=Thyssen%2C+Sven&isbn=&jtitle=Early+Child+Development+and  
+Care&bttitle=&rft\_id=info:eric/EJ770725

ER -

TY - JOUR

ID - 2028

T1 - Weak Central Coherence, Poor Joint Attention, and Low Verbal Ability: Independent Deficits in Early Autism

A1 - Morgan,Bronwyn

A1 - Maybery,Murray

A1 - Durkin,Kevin

Y1 - 2003///

KW - ERIC

KW - Unsupervised Play Addition  
KW - theory of mind  
KW - Visual Attention  
KW - ERIC,Current Index to Journals in Education (CIJE)  
KW - Developmental Disabilities  
KW - Comparative Analysis  
KW - Symptoms (Individual Disorders)  
KW - Young Children  
KW - Verbal Ability  
KW - Theories  
KW - Pervasive Developmental Disorders  
KW - Pretend Play  
KW - Autism  
KW - Attention  
KW - Predictor Variables  
RP - NOT IN FILE  
SP - 646  
EP - 656  
JF - Developmental Psychology  
JA - Dev.Psychol.  
VL - 39  
IS - 4  
N2 - Compared preschoolers with autism spectrum disorders with a matched control group to investigate whether weak central coherence could account for deficits in two behaviors purported to tap capabilities fundamental to a theory of mind: joint attention and pretend play. Found that pretend play did not differentiate the two groups. Weak central coherence, poor joint attention, and low verbal ability contributed significantly and independently to predicting autism group membership. (Author/KB)  
SN - 0012-1649, 0012-1649  
UR - <http://search.proquest.com/docview/62167930?accountid=14701>  
L2 - [http://sfx.scholarsportal.info/ottawa?url\\_ver=Z39.88-2004&rft\\_val\\_fmt=info:ofi/fmt:kev:mtx:journal&genre=article&sid=ProQ:ProQ%3Aericshell&atitle=Weak+Central+Coherence%2C+Poor+Joint+Attention%2C+and+Low+Verbal+Ability%3A+Independent+Deficits+in+Early+Autism.&title=Developmental+Psychology&issn=00121649&date=2003-01-01&volume=39&issue=4&spage=646&au=Morgan%2C+Bronwyn%3BMaybery%2C+Murray%3BDurkin%2C+Kevin&isbn=&jtitle=Developmental+Psychology&btittle=&rft\\_id=info:eric/EJ678194](http://sfx.scholarsportal.info/ottawa?url_ver=Z39.88-2004&rft_val_fmt=info:ofi/fmt:kev:mtx:journal&genre=article&sid=ProQ:ProQ%3Aericshell&atitle=Weak+Central+Coherence%2C+Poor+Joint+Attention%2C+and+Low+Verbal+Ability%3A+Independent+Deficits+in+Early+Autism.&title=Developmental+Psychology&issn=00121649&date=2003-01-01&volume=39&issue=4&spage=646&au=Morgan%2C+Bronwyn%3BMaybery%2C+Murray%3BDurkin%2C+Kevin&isbn=&jtitle=Developmental+Psychology&btittle=&rft_id=info:eric/EJ678194)  
ER -  
  
TY - GEN  
ID - 2030  
T1 - Choosing Play Materials for Primary School Children (Ages 6-8). NAEYC Resources in Focus: Selected Excerpts  
A1 - Bronson,Martha B.  
Y1 - 2003///  
N1 - Last updated - 2012-12-14  
KW - ERIC  
KW - Unsupervised Play Addition  
KW - National Association Educ of Young Children  
KW - Play Materials  
KW - ERIC,Current Index to Journals in Education (CIJE)  
KW - Primary Education  
KW - Instructional Materials  
KW - Play  
KW - Young Children  
KW - Organizations (Groups)  
KW - Selection  
RP - NOT IN FILE

SP - 24

EP - 25

JF - Young Children

VL - 58

IS - 3

N2 - Presents guidelines for selecting materials for 6- to 8-year-olds in primary school settings involved in four categories of play: social and fantasy play; exploration and mastery play; music, art, and movement play; and gross motor play. Asserts that providing a variety of materials for children's independent activities pursued alone or with peers is one dimension of effectively responding to individual differences within the classroom. (KB)

UR - <http://search.proquest.com/docview/62243452?accountid=14701>

L2 - [http://sfx.scholarsportal.info/ottawa?url\\_ver=Z39.88-](http://sfx.scholarsportal.info/ottawa?url_ver=Z39.88-)

2004&rft\_val\_fmt=info:ofi/fmt:kev:mtx:journal&genre=article&sid=ProQ:ProQ%3Aericshell&atitle=Choosing+Play+Materials+for+Primary+School+Children+%28Ages+6-

8%29.+NAEYC+Resources+in+Focus%3A+Selected+Excerpts.&title=Young+Children&issn=15386619&date=2003-01-

01&volume=58&issue=3&spage=24&au=Bronson%2C+Martha+B.&isbn=&jtitle=Young+Children&bttitle=&rft\_id=info:eric/EJ672020

ER -

TY - JOUR

ID - 2031

T1 - Making Sense of Outdoor Pretend Play

A1 - Perry, Jane P.

Y1 - 2003///

KW - ERIC

KW - Unsupervised Play Addition

KW - ERIC, Current Index to Journals in Education (CIJE)

KW - Early Childhood Education

KW - Outdoor Activities

KW - Teacher Student Relationship

KW - Play

KW - Learning Centers (Classroom)

KW - Pretend Play

KW - Preschool Children

RP - NOT IN FILE

SP - 26

EP - 30

JF - Young Children

VL - 58

IS - 3

N2 - Focuses on the independent outdoor pretend play of preschool children. Describes the complex learning occurring in a university child study center's play yard and in outdoor learning centers, how teachers complement children's play, and the importance of space. Illustrates the pattern of pretend play: initiation, negotiation, and enactment. Includes a sample diagram of an outdoor setting for preschool and primary grades and suggestions for recording observations. (KB)

SN - 1538-6619, 1538-6619

UR - <http://search.proquest.com/docview/62245477?accountid=14701>

L2 - [http://sfx.scholarsportal.info/ottawa?url\\_ver=Z39.88-](http://sfx.scholarsportal.info/ottawa?url_ver=Z39.88-)

2004&rft\_val\_fmt=info:ofi/fmt:kev:mtx:journal&genre=article&sid=ProQ:ProQ%3Aericshell&atitle=Making+Sense+of+Outdoor+Pretend+Play.&title=Young+Children&issn=15386619&date=2003-01-

01&volume=58&issue=3&spage=26&au=Perry%2C+Jane+P.&isbn=&jtitle=Young+Children&bttitle=&rft\_id=info:eric/EJ672021

ER -

TY - GEN

ID - 2032

T1 - A Validation Study of the Penn Interactive Peer Play Scale with Urban Hispanic and African American Preschool Children

A1 - Castro, Marcelo

A1 - Mendez, Julia L.

A1 - Fantuzzo, John

Y1 - 2002///

N1 - Last updated - 2012-12-14

KW - ERIC

KW - Unsupervised Play Addition

KW - ERIC, Current Index to Journals in Education (CIJE)

KW - Preschool Education

KW - Play

KW - School Psychology

KW - Test Validity

KW - Black Students

KW - Hispanic American Students

KW - Factor Structure

KW - Preschool Children

KW - Psychometrics

KW - Peer Relationship

RP - NOT IN FILE

SP - 109

EP - 127

JF - School Psychology Quarterly

VL - 17

IS - 2

N2 - Investigates the psychometric properties of a Spanish and English version of the Penn Interactive Peer Play Scale (PIPPS) when employed with Spanish- and English-speaking teachers and students. The independent emergence of comparable Spanish and English PIPPS factor structures provides initial support for use of this measure in research with Hispanic preschool children from low-income backgrounds. (Contains 65 references and 3 tables.) (GCP)

UR - <http://search.proquest.com/docview/62302670?accountid=14701>

L2 - [http://sfx.scholarsportal.info/ottawa?url\\_ver=Z39.88-](http://sfx.scholarsportal.info/ottawa?url_ver=Z39.88-)

2004&rft\_val\_fmt=info:ofi/fmt:kev:mtx:journal&genre=article&sid=ProQ:ProQ%3Aericshell&atitle=A+Validation+Study+of+the+Penn+Interactive+Peer+Play+Scale+with+Urban+Hispanic+and+African+American+Preschool+Children.&title=School+Psychology+Quarterly&issn=10453830&date=2002-01-01&volume=17&issue=2&spage=109&au=Castro%2C+Marcelo%3BMendez%2C+Julia+L.%3BFantuzzo%2C+John&isbn=&jtitle=School+Psychology+Quarterly&bttitle=&rft\_id=info:eric/EJ650127

ER -

TY - JOUR

ID - 2033

T1 - A Critical Approach to Will Hobbs'"Bearstone" from a Play Perspective

A1 - Thompson, Edgar H.

A1 - Sluss, Dorothy

Y1 - 2000///

KW - ERIC

KW - Unsupervised Play Addition

KW - Piaget (Jean)

KW - Smilanskys Cognitive Play Categories

KW - ERIC, Current Index to Journals in Education (CIJE)

KW - Secondary Education

KW - Literary Criticism

KW - Childrens Games

KW - Literary Devices

KW - Literature Appreciation

KW - Child Behavior

KW - Dramatic Play

KW - Adolescent Literature

KW - Novels

RP - NOT IN FILE

SP - 8

EP - 10

JF - ALAN Review

VL - 27

IS - 2

N2 - Claims there is a missing link between the two seemingly independent stories in Will Hobbs' novel "Bearstone." This missing link can be found through looking at four kinds of play that occur in the novel. (NH)

SN - 0882-2840, 0882-2840

UR - <http://search.proquest.com/docview/62425615?accountid=14701>

L2 - [http://sfx.scholarsportal.info/ottawa?url\\_ver=Z39.88-](http://sfx.scholarsportal.info/ottawa?url_ver=Z39.88-)

2004&rft\_val\_fmt=info:ofi/fmt:kev:mtx:journal&genre=article&sid=ProQ:ProQ%3Aericshell&atitle=A+Critical+Approach+to+Will+Hobbs%27%22Bearstone%22+from+a+Play+Perspective.&title=ALAN+Review&issn=08822840&date=2000-01-

01&volume=27&issue=2&spage=8&au=Thompson%2C+Edgar+H.%3B+Sluss%2C+Dorothy&isbn=&jtitle=ALAN+Review&bttitle=&rft\_id=info:eric/EJ604677

ER -

TY - JOUR

ID - 2035

T1 - A Factor Analysis of Pre-school Children's Play Strategies and Cognitive Style

A1 - Saracho,Olivia N.

Y1 - 1999///

KW - ERIC

KW - Unsupervised Play Addition

KW - ERIC,Current Index to Journals in Education (CIJE)

KW - Early Childhood Education

KW - Higher Education

KW - Play

KW - Cognitive Development

KW - Social Behavior

KW - Child Development

KW - Observation

KW - Preschool Children

KW - Cognitive Style

KW - Factor Analysis

RP - NOT IN FILE

SP - 165

EP - 180

JF - Educational Psychology: An International Journal of Experimental Educational Psychology

VL - 19

IS - 2

N2 - Explores children's play as social behavior in relation to cognitive style and identifies the social factors underlying both young children's play and cognitive style. Indicates that field-dependent children participated more in social play activities, while field-independent children engaged in more nonsocial play activities. Discusses the implications for practice and research. Includes references. (CMK)

SN - 0144-3410, 0144-3410

UR - <http://search.proquest.com/docview/62315448?accountid=14701>

L2 - [http://sfx.scholarsportal.info/ottawa?url\\_ver=Z39.88-](http://sfx.scholarsportal.info/ottawa?url_ver=Z39.88-)

2004&rft\_val\_fmt=info:ofi/fmt:kev:mtx:journal&genre=article&sid=ProQ:ProQ%3Aericshell&atitle=A+Factor+Analysis+of+Pre-school+Children%27s+Play+Strategies+and+Cognitive+Style.&title=Educational+Psychology%3A+An+Intern



ational+Journal+of+Experimental+Educational+Psychology&issn=01443410&date=1999-01-01&volume=19&issue=2&spage=165&au=Saracho%2C+Olivia+N.&isbn=&jtitle=Educational+Psychology%3A+An+International+Journal+of+Experimental+Educational+Psychology&btile=&rft\_id=info:eric/EJ625621  
ER -

TY - RPRT

ID - 2037

T1 - Early Supplemental Feeding and Spontaneous Play in West Java, Indonesia

A1 - Walka,Helen

A1 - Pollitt,Ernesto

A1 - Triana,Nina

A1 - Jahari,Abas B.

Y1 - 1997/04//

N1 - Availability - Level 1 - Available online, if indexed January 1993 onward

SuppNotes - Paper presented at the Biennial Meeting of the Society for Research in Child Development (62nd, Washington, DC, April 3-6, 1997)

Last updated - 2012-12-14

KW - ERIC

KW - Unsupervised Play Addition

KW - Functional Play

KW - Indonesia (West Java)

KW - Manipulative Play

KW - Nutritional Supplements

KW - ERIC,Resources in Education (RIE)

KW - Experiments

KW - Comparative Analysis

KW - Toddlers

KW - Play

KW - Foreign Countries

KW - Sex Differences

KW - Pretend Play

KW - Nutrition

KW - Infants

RP - NOT IN FILE

SP - 13

N2 - This study examined the effects of nutritional supplements on the duration and level of spontaneous play of 55 mildly to moderately malnourished toddlers living within the tea plantations of West Java, Indonesia. Infants were randomly assigned by their day care centers to one of three supplement groups: (1) energy and micronutrient supplements; (2) micronutrient plus skim milk; and (3) skim milk alone. After 6 months of supplementation, the children (age 24 months) were videotaped for 30 minutes playing with toys in their home with their caregiver present. The videotapes were coded for duration and frequency of four developmental levels of play behavior: manipulative, relational, functional, and symbolic play. Duration of time off-task, waiting before playing, breastfeeding, and time in social interaction were also coded. Findings indicated that girls demonstrated longer play duration and higher play level, independent of supplementation. There were consistent effects of supplementation on duration and interest in play. Children in the energy plus micronutrient supplementation group played with more toys, had longer activity spans, were less likely to breastfeed, and were less likely to engage in social interaction outside of play than children in other groups. Girls benefited from the supplementation more than boys. (Author/AS)

UR - <http://search.proquest.com/docview/62498998?accountid=14701>

ER -

TY - JOUR

ID - 2038

T1 - Young Children's Understanding of Pretense Expressions of Independent Agency

A1 - Kavanaugh,Robert D.

A1 - Eizenman,Dara R.

A1 - Harris,Paul L.

Y1 - 1997///

KW - ERIC

KW - Unsupervised Play Addition

KW - ERIC,Current Index to Journals in Education (CIJE)

KW - Toddlers

KW - Cognitive Development

KW - Infant Behavior

KW - Sex Differences

KW - Intention

KW - Pretend Play

KW - Age Differences

RP - NOT IN FILE

SP - 764

EP - 770

JF - Developmental Psychology

JA - Dev.Psychol.

VL - 33

IS - 5

N2 - Studied 2-year olds' understanding of pretense expressions of independent agency in scenarios in which a doll acted as the agent of a series of pretend events. Found no gender differences in the doll's imaginary intentions, but older toddlers performed reliably better than younger. Episodes requiring enacting conclusions to events that began with doll-directed actions were difficult for children to comprehend. (Author/KB)

SN - 0012-1649, 0012-1649

UR - <http://search.proquest.com/docview/62555265?accountid=14701>

L2 - [http://sfx.scholarsportal.info/ottawa?url\\_ver=Z39.88-](http://sfx.scholarsportal.info/ottawa?url_ver=Z39.88-)

2004&rft\_val\_fmt=info:ofi/fmt:kev:mtx:journal&genre=article&sid=ProQ:ProQ%3Aericshell&atitle=Young+Children%27s+Understanding+of+Pretense+Expressions+of+Independent+Agency.&title=Developmental+Psychology&issn=00121649&date=1997-01-

01&volume=33&issue=5&page=764&au=Kavanaugh%2C+Robert+D.%3BEizenman%2C+Dara+R.%3BHarris%2C+Paul+L.&isbn=&jtitle=Developmental+Psychology&bttitle=&rft\_id=info:eric/EJ561705

ER -

TY - RPRT

ID - 2039

T1 - Preschool Children's Cognitive Styles and Play Behaviors

A1 - Saracho,Olivia N.

Y1 - 1996///

N1 - Last updated - 2012-12-14

KW - ERIC

KW - Unsupervised Play Addition

KW - ERIC,Current Index to Journals in Education (CIJE)

KW - Play

KW - Child Behavior

KW - Field Dependence Independence

KW - Behavior Patterns

KW - Preschool Children

KW - Cognitive Style

KW - Age Differences

RP - NOT IN FILE

SP - 125

EP - 148

N2 - Tested 2,400 three- to five-year olds for cognitive style and observed their play behaviors. Repeated measures multivariate analysis indicated that field-independent children engaged in more play than did field-dependent children. Significant interaction was found for age, cognitive style, and play behaviors. Older field-

independent children exhibited more field independence and play behaviors than did younger field- dependent children. (HTH)

UR - <http://search.proquest.com/docview/62599053?accountid=14701>

L2 - [http://sfx.scholarsportal.info/ottawa?url\\_ver=Z39.88-](http://sfx.scholarsportal.info/ottawa?url_ver=Z39.88-)

2004&rft\_val\_fmt=info:ofi/fmt:kev:mtx:book&genre=unknown&sid=ProQ:ERIC&atitle=&title=Preschool+Children%27s+Cognitive+Styles+and+Play+Behaviors.&issn=00094005&date=1996-01-

01&volume=&issue=&spage=125&au=Saracho%2C+Olivia+N.&isbn=&jtitle=&bttitle=Preschool+Children%27s+Cognitive+Styles+and+Play+Behaviors.&rft\_id=info:eric/EJ533033

ER -

TY - RPRT

ID - 2040

T1 - Constructing Knowledge about Play: Case Method and Teacher Education

A1 - Klein,Amelia

Y1 - 1996///

N1 - Availability - Level 2 - Produced in microfiche (1966-2003)

SuppNotes - In: Playing for Keeps: Supporting Children's Play. Topics in Early Childhood Education, Volume 2; see PS 025 050

Last updated - 2012-12-14

KW - ERIC

KW - Unsupervised Play Addition

KW - Case Analysis

KW - Case Histories

KW - ERIC,Resources in Education (RIE)

KW - Early Childhood Education

KW - Higher Education

KW - Play

KW - Case Studies

KW - Teacher Education

KW - Constructivism (Learning)

KW - Teaching Methods

KW - Models

KW - Case Method (Teaching Technique)

RP - NOT IN FILE

SP - 11

N2 - This paper explores the case method as a model for teaching education students about play. The case method may contribute to an examination of the barriers to children's play expression within school and create more effective classroom practice. Within the model, students can consider cases which have been carefully constructed from actual practice and designed to illuminate the complexity of human situations. Through discussion, analysis, and collaborative problem solving, the case method provides an interactive forum in which students can construct knowledge about the nature, value, and purpose of play in early education. Play education should be guided by a framework building upon and integrating: (1) theoretical knowledge regarding play; (2) practical skills applied in the classroom setting; and (3) dispositions toward play and children's learning. The case method facilitates self-governed learning; produces cognitive dissonance; requires students to apply theories, use analytical skills, and create innovative approaches to resolving problems; and fosters independent thinking and reflection. It is important to develop with care the written narrative and case questions, to conduct the case discussion, and teach case writing to students. A play case bank may be built with teacher- and student-written cases, videos, films, and books. (KDFB)

UR - <http://search.proquest.com/docview/62593127?accountid=14701>

L2 - [http://sfx.scholarsportal.info/ottawa?url\\_ver=Z39.88-](http://sfx.scholarsportal.info/ottawa?url_ver=Z39.88-)

2004&rft\_val\_fmt=info:ofi/fmt:kev:mtx:book&genre=unknown&sid=ProQ:ERIC&atitle=&title=Constructing+Knowledge+about+Play%3A+Case+Method+and+Teacher+Education.&issn=&date=1996-01-

01&volume=&issue=&spage=11&au=Klein%2C+Amelia&isbn=&jtitle=&bttitle=Constructing+Knowledge+about+Play%3A+Case+Method+and+Teacher+Education.&rft\_id=info:eric/ED405103

ER -

TY - RPRT

ID - 2041

T1 - The Relationship of Preschool Children's Cognitive Style to Their Play Preferences

A1 - Saracho,Olivia N.

Y1 - 1994///

N1 - Last updated - 2012-12-14

KW - ERIC

KW - Unsupervised Play Addition

KW - Analytic Ability

KW - Manipulative Play

KW - Play Style

KW - ERIC,Current Index to Journals in Education (CIJE)

KW - Preschool Education

KW - Play

KW - Interpersonal Competence

KW - Field Dependence Independence

KW - Dramatic Play

KW - Sex Differences

KW - Preschool Children

KW - Cognitive Style

RP - NOT IN FILE

SP - 21

EP - 33

N2 - Three hundred preschoolers aged 3 through 5 were tested for their cognitive style and their preferences for different play areas. Results indicated that field-independent (FI) children (socially detached with high analytical abilities) preferred physical and block play more than field-dependent (FD) children (socially adept and sensitive) and that FI children engaged more in manipulative play than did FD children. (MDM)

UR - <http://search.proquest.com/docview/62813773?accountid=14701>

L2 - [http://sfx.scholarsportal.info/ottawa?url\\_ver=Z39.88-](http://sfx.scholarsportal.info/ottawa?url_ver=Z39.88-)

2004&rft\_val\_fmt=info:ofi/fmt:kev:mtx:book&genre=unknown&sid=ProQ:ERIC&atitle=&title=The+Relations  
hip+of+Preschool+Children%27s+Cognitive+Style+to+Their+Play+Preferences.&issn=03004430&date=1994-  
01-

01&volume=&issue=&spage=21&au=Saracho%2C+Olivia+N.&isbn=&jtitle=&btittle=The+Relationship+of+Pr  
eschool+Children%27s+Cognitive+Style+to+Their+Play+Preferences.&rft\_id=info:eric/EJ479930

ER -

TY - RPRT

ID - 2043

T1 - Preschool Children's Use and Perceptions of Outdoor Play Areas

A1 - Cullen,Joy

Y1 - 1993///

N1 - Last updated - 2012-12-14

KW - ERIC

KW - Unsupervised Play Addition

KW - Australia (Perth)

KW - ERIC,Current Index to Journals in Education (CIJE)

KW - Early Childhood Education

KW - Childhood Attitudes

KW - Physical Activities

KW - Play

KW - Foreign Countries

KW - Teacher Attitudes

KW - Sex Differences

KW - Creativity

KW - Preschool Children

KW - Playground Activities

RP - NOT IN FILE

SP - 45

EP - 56

N2 - Forty preschool children were observed in outdoor play areas and interviewed about their perceptions of the observed play. The children's teachers were also interviewed. It was found that a significant negative correlation existed between physical play and creative play and that the majority of children perceived that outdoor play was independent and did not require assistance from the teacher. (MDM)

UR - <http://search.proquest.com/docview/62795110?accountid=14701>

L2 - [http://sfx.scholarsportal.info/ottawa?url\\_ver=Z39.88-](http://sfx.scholarsportal.info/ottawa?url_ver=Z39.88-)

2004&rft\_val\_fmt=info:ofi/fmt:kev:mtx:book&genre=unknown&sid=ProQ:ERIC&atitle=&title=Preschool+Children%27s+Use+and+Perceptions+of+Outdoor+Play+Areas.&issn=03004430&date=1993-01-01&volume=&issue=&spage=45&au=Cullen%2C+Joy&isbn=&jtitle=&bttitle=Preschool+Children%27s+Use+and+Perceptions+of+Outdoor+Play+Areas.&rft\_id=info:eric/EJ473193

ER -

TY - JOUR

ID - 2044

T1 - "You Can't Be Grandma; You're a Boy": Events within the Thematic Fantasy Play Context That Contribute to Story Comprehension

A1 - Williamson, Peter A.

A1 - Silvern, Steven B.

Y1 - 1992///

KW - ERIC

KW - Unsupervised Play Addition

KW - Metaplay

KW - Productive Language Competence

KW - Retelling

KW - ERIC, Current Index to Journals in Education (CIJE)

KW - Primary Education

KW - Kindergarten Children

KW - Play

KW - Language Acquisition

KW - Story Telling

KW - Story Grammar

KW - Piagetian Theory

KW - Comprehension

KW - Story Reading

KW - Pretend Play

KW - Fairy Tales

RP - NOT IN FILE

SP - 75

EP - 93

JF - Early Childhood Research Quarterly

VL - 7

IS - 1

N2 - Examined the contribution of play, metaplay, and productive language competence in the thematic-fantasy play context to kindergartners' comprehension of familiar and unfamiliar stories. Results indicated that metaplay and productive language competence are independent constructs and both contribute to comprehension, whereas play does not. (GLR)

SN - 0885-2006, 0885-2006

UR - <http://search.proquest.com/docview/62935649?accountid=14701>

L2 - [http://sfx.scholarsportal.info/ottawa?url\\_ver=Z39.88-](http://sfx.scholarsportal.info/ottawa?url_ver=Z39.88-)

2004&rft\_val\_fmt=info:ofi/fmt:kev:mtx:journal&genre=article&sid=ProQ:ProQ%3Aericshell&atitle=%22You+Can%27t+Be+Grandma%3B+You%27re+a+Boy%22%3A+Events+within+the+Thematic+Fantasy+Play+Context+That+Contribute+to+Story+Comprehension.&title=Early+Childhood+Research+Quarterly&issn=08852006&date=1992-01-

01&volume=7&issue=1&spage=75&au=Williamson%2C+Peter+A.%3BSilvern%2C+Steven+B.&isbn=&jtitle=Early+Childhood+Research+Quarterly&bttitle=&rft\_id=info:eric/EJ446317  
ER -

TY - RPRT

ID - 2047

T1 - Playing with Fear: Children's Play and Its Role in Expressing Fears

A1 - Heibeck, Tracy H.

Y1 - 1989/04//

N1 - Availability - Level 1 - Available online, if indexed January 1993 onward

SuppNotes - Paper presented at the Biennial Meeting of the Society for Research in Child Development (Kansas City, MO, April 27-30, 1989)

Last updated - 2012-12-14

KW - ERIC

KW - Unsupervised Play Addition

KW - ERIC, Resources in Education (RIE)

KW - Preschool Education

KW - Play

KW - Fear

KW - Affective Behavior

KW - Videotape Recordings

KW - Preschool Children

KW - Aggression

KW - Emotional Experience

KW - Maturity (Individuals)

RP - NOT IN FILE

SP - 44

N2 - Preschool children's fears of animals and the dark were investigated in an effort to examine how preschoolers use play as a medium for expressing fearful emotions. A total of 48 children participated in the study. Interviews with parents were used to identify 12 preschoolers who were anxious about the dark and 12 who were anxious about dogs; 24 children were rated by parents as not being anxious about these experiences. Each child was invited to create stories about topics suggested by the experimenter. Some topics included benign themes popular in children's play; other themes reflected fears of dogs and darkness. Each child's videotaped play session was coded by three independent judges on measures assessing the maturity, duration, imaginativeness, aggression, concentration of play, and other factors. Children who were anxious about dogs played less constructively and at a less mature level in regards to that topic than did children not anxious about dogs. But children anxious about the dark were able to engage in well-developed pretend play when playing about benign themes and about the dark. These children tended to include more aggression in their play, especially when the story involved the dark. It is suggested that findings have implications for the use of play in therapy with children. (Author/RH)

UR - <http://search.proquest.com/docview/63128908?accountid=14701>

L2 - [http://sfx.scholarsportal.info/ottawa?url\\_ver=Z39.88-](http://sfx.scholarsportal.info/ottawa?url_ver=Z39.88-)

2004&rft\_val\_fmt=info:ofi/fmt:kev:mtx:book&genre=unknown&sid=ProQ:ERIC&atitle=&title=Playing+with+Fear%3A+Children%27s+Play+and+Its+Role+in+Expressing+Fears.&issn=&date=1989-04-

01&volume=&issue=&spage=44&au=Heibeck%2C+Tracy+H.&isbn=&jtitle=&bttitle=Playing+with+Fear%3A+Children%27s+Play+and+Its+Role+in+Expressing+Fears.&rft\_id=info:eric/ED307995

ER -

TY - JOUR

ID - 2048

T1 - Cognitive Style in the Play of Young Children

A1 - Saracho, Olivia N.

Y1 - 1989///

KW - ERIC

KW - Unsupervised Play Addition

KW - Child Behavior

KW - ERIC,Current Index to Journals in Education (CIJE)

KW - Play

KW - Young Children

KW - Individual Differences

KW - Field Dependence Independence

KW - Social Behavior

KW - Sex Differences

KW - Cognitive Style

RP - NOT IN FILE

SP - 65

EP - 76

JF - Early Child Development and Care

VL - 51

N2 - Assessed cognitive styles of 300 children aged 3-5 years and explored social factors in children's play based on their cognitive style. Field dependent children engaged more often in activities with others and with concrete objects, while field independent children were more involved in restructuring the environment. (RJC)

UR - <http://search.proquest.com/docview/63068426?accountid=14701>

L2 - [http://sfx.scholarsportal.info/ottawa?url\\_ver=Z39.88-](http://sfx.scholarsportal.info/ottawa?url_ver=Z39.88-)

2004&rft\_val\_fmt=info:ofi/fmt:kev:mtx:journal&genre=article&sid=ProQ:ProQ%3Aericshell&atitle=Cognitive+Style+in+the+Play+of+Young+Children.&title=Early+Child+Development+and+Care&issn=&date=1989-01-01&volume=51&issue=&spage=65&au=Saracho%2C+Olivia+N.&isbn=&jtitle=Early+Child+Development+and+Care&bttitle=&rft\_id=info:eric/EJ407422

ER -

TY - JOUR

ID - 2049

T1 - Negotiation and Enactment in Social Pretend Play: Relations to Social Acceptance and Social Cognition

A1 - Doyle,Anna Beth

A1 - Connolly,Jennifer

Y1 - 1989///

KW - ERIC

KW - Unsupervised Play Addition

KW - Enactment

KW - Negotiation Process

KW - ERIC,Current Index to Journals in Education (CIJE)

KW - Play

KW - Young Children

KW - Interpersonal Competence

KW - Social Cognition

KW - SOCIALIZATION

KW - Peer Acceptance

RP - NOT IN FILE

SP - 289

EP - 302

JF - Early Childhood Research Quarterly

VL - 4

IS - 3

N2 - Observed 62 children, 4- and 5-years-old, to determine the relation between negotiation and enactment in social pretend play and to indices of social acceptance and cognition. Negotiation and enactment were positively correlated and predicted peer social acceptance. Enactment predicted peer acceptance independent of negotiation. (RJC)

UR - <http://search.proquest.com/docview/63058067?accountid=14701>

L2 - [http://sfx.scholarsportal.info/ottawa?url\\_ver=Z39.88-](http://sfx.scholarsportal.info/ottawa?url_ver=Z39.88-)

2004&rft\_val\_fmt=info:ofi/fmt:kev:mtx:journal&genre=article&sid=ProQ:ProQ%3Aericshell&atitle=Negotiation+and+Enactment+in+Social+Pretend+Play%3A+Relations+to+Social+Acceptance+and+Social+Cognition.&title=Early+Childhood+Research+Quarterly&issn=&date=1989-01-

01&volume=4&issue=3&spage=289&au=Doyle%2C+Anna-Beth%3BConnolly%2C+Jennifer&isbn=&jtitle=Early+Childhood+Research+Quarterly&bttitle=&rft\_id=info:eric/EJ402838

ER -

TY - JOUR

ID - 2050

T1 - The Factorial Structure of Three- to Five-Year-Old Children's Social Behavior: Cognitive Style and Play

A1 - Saracho,Olivia N.

Y1 - 1989///

KW - ERIC

KW - Unsupervised Play Addition

KW - Preschool Embedded Figures Test

KW - ERIC,Current Index to Journals in Education (CIJE)

KW - Early Childhood Education

KW - Play

KW - Field Dependence Independence

KW - Social Development

KW - Factor Analysis

KW - Peer Relationship

RP - NOT IN FILE

SP - 21

EP - 28

JF - Journal of Research and Development in Education

VL - 22

IS - 4

N2 - Results are reported from a study which explored which play behaviors are characteristic of the field dependent and field independent cognitive styles. Social factors underlying cognitive style and play are identified. Subjects were 300 3- to 5-year-old children. Implications for teachers and researchers are discussed. (IAH)

UR - <http://search.proquest.com/docview/63052034?accountid=14701>

L2 - [http://sfx.scholarsportal.info/ottawa?url\\_ver=Z39.88-](http://sfx.scholarsportal.info/ottawa?url_ver=Z39.88-)

2004&rft\_val\_fmt=info:ofi/fmt:kev:mtx:journal&genre=article&sid=ProQ:ProQ%3Aericshell&atitle=The+Factorial+Structure+of+Three-+to+Five-Year-Old+Children%27s+Social+Behavior%3A+Cognitive+Style+and+Play.&title=Journal+of+Research+and+Development+in+Education&issn=&date=1989-01-

01&volume=22&issue=4&spage=21&au=Saracho%2C+Olivia+N.&isbn=&jtitle=Journal+of+Research+and+Development+in+Education&bttitle=&rft\_id=info:eric/EJ398431

ER -

TY - GEN

ID - 2052

T1 - Cognitive/Developmental Characteristics of Play and Their Relation to Ego Resiliency: A Longitudinal Study

A1 - Gordon,Debra Ellen

Y1 - 1987/04//

N1 - Availability - Level 1 - Available online, if indexed January 1993 onward

SuppNotes - Paper presented at the Biennial Meeting of the Society for Research in Child Development (Baltimore, MD, April 23-26, 1987)

Last updated - 2012-12-14

KW - ERIC

KW - Unsupervised Play Addition

KW - Ego Resiliency

KW - ERIC,Resources in Education (RIE)

KW - Researchers

KW - Play



KW - Cognitive Development  
KW - Adjustment (to Environment)  
KW - Sex Differences  
KW - Pretend Play  
KW - Preschool Children  
KW - Longitudinal Studies  
KW - Coping  
KW - CHILDREN  
KW - Adolescents  
RP - NOT IN FILE  
SP - 22

N2 - This study links cognitive development and psychological adaptation by relating play attributes, assessed from a predominantly cognitive-developmental perspective, to "ego resiliency," which is a measure of flexibility in coping with stress. Subjects were 104 participants in a longitudinal study (Block & Block, 1980); 78 were given solitary free play assessments at age 3, and all 104 were administered similar play assessments at age 11. Numerous scaled play ratings were grouped into two play dimensions for each age level: "Symbolic Elaboration" and "Intercoordination/Organization." Ego resiliency scores were derived from independent personality Q-sorts at ages 3, 11, 14, and 18 years. For both sexes, concurrent relationships between play dimensions and ego resiliency were examined at age 3 and age 11. Furthermore, play activities of 3- and 11-year-olds were related longitudinally to ego resiliency at ages 11, 14, and 18. Consistency of play behavior from age 3 to age 11 was explored. A five-page reference list is included. (Author/PCB)

UR - <http://search.proquest.com/docview/63263683?accountid=14701>

L2 - [http://sfx.scholarsportal.info/ottawa?url\\_ver=Z39.88-](http://sfx.scholarsportal.info/ottawa?url_ver=Z39.88-)

2004&rft\_val\_fmt=info:ofi/fmt:kev:mtx:journal&genre=unknown&sid=ProQ:ProQ%3Aericshell&atitle=Cognitive%2FDevelopmental+Characteristics+of+Play+and+Their+Relation+to+Ego+Resiliency%3A+A+Longitudinal+Study.&title=&issn=&date=1987-04-01&volume=&issue=&spage=22&au=Gordon%2C+Debra+Ellen&isbn=&jtitle=&btittle=&rft\_id=info:eric/ED284677

ER -

TY - GEN

ID - 2053

T1 - A Practical Guide to Play, Piaget, and Language in Preprimary Hearing Impaired Programs

A1 - Smith,Dawn

Y1 - 1987/04//

N1 - Availability - Level 1 - Available online, if indexed January 1993 onward

Last updated - 2012-12-14

KW - ERIC

KW - Unsupervised Play Addition

KW - Detroit Public Schools MI

KW - ERIC,Resources in Education (RIE)

KW - Teachers

KW - Practitioners

KW - Preschool Education

KW - Teacher Role

KW - Play

KW - Language Acquisition

KW - Hearing Impairments

KW - Cognitive Development

KW - Class Activities

KW - Classroom Environment

KW - Audiolingual Skills

KW - Classroom Techniques

KW - Classroom Design

KW - Demonstration Programs

KW - Family School Relationship

KW - Classroom Observation Techniques

KW - Interpersonal Competence

KW - Diagnostic Tests

KW - Developmental Stages

KW - Curriculum Guides

KW - Social Development

KW - Piagetian Theory

RP - NOT IN FILE

SP - 572

N2 - This detailed curriculum guide describes a model program (the Preschool Hearing Impaired Support Center) implemented in the Detroit Public Schools' preprimary classes for the hearing impaired. The auditory-oral approach is based on the developmental philosophy of Jean Piaget and on principles of regular early childhood education programs. Section I discusses the program's overall philosophy and theoretical orientation. Section II, on the classroom environment, describes physical space arrangements, materials, and accessories, while section III covers the daily schedule, lesson plans and planning, teacher planning, and time management. Section IV explains the role of the adult; it includes strategies for facilitating learning and describes keys for teacher success. Detailed curricular objectives for cognitive, language, speech, auditory, and social development are outlined in section V. Content and materials for independent, small group, and large group activities are described in section VI. In section VII, sample objectives and examples of teacher-child interactions are used to demonstrate the integration of cognitive, language, and social learning throughout the curriculum. Section VIII presents sample observation checklists, summarizes evaluation instruments considered most useful for teachers, and includes a teacher's guide to analyzing play observations. Section IX presents objectives and specific activities for school-home-school carryover. The final section of the guide is comprised of sample forms. (JW)

UR - <http://search.proquest.com/docview/63163549?accountid=14701>

L2 - [http://sfx.scholarsportal.info/ottawa?url\\_ver=Z39.88-](http://sfx.scholarsportal.info/ottawa?url_ver=Z39.88-)

2004&rft\_val\_fmt=info:ofi/fmt:kev:mtx:journal&genre=unknown&sid=ProQ:ProQ%3Aericshell&atitle=A+Practical+Guide+to+Play%2C+Piaget%2C+and+Language+in+Preprimary+Hearing+Impaired+Programs.&title=&issn=&date=1987-04-

01&volume=&issue=&spage=572&au=Smith%2C+Dawn&isbn=&jtitle=&bttitle=&rft\_id=info:eric/ED286293

ER -

TY - JOUR

ID - 2054

T1 - Independent and Social Play among Profoundly Mentally Retarded Adults: Training, Maintenance, Generalization, and Long-Term Follow-Up

A1 - Singh,Nirbhay N.

A1 - Millichamp,Jane C.

Y1 - 1987///

KW - ERIC

KW - Unsupervised Play Addition

KW - ERIC,Current Index to Journals in Education (CIJE)

KW - Severe Mental Retardation

KW - Prompting

KW - Play

KW - Followup Studies

KW - Interpersonal Competence

KW - Leisure Time

KW - Generalization

KW - Training Methods

KW - Adults

KW - Interpersonal Relationship

KW - Normalization (Handicapped)

RP - NOT IN FILE

SP - 23

EP - 34

JF - Journal of Applied Behavior Analysis

JA - J Appl. Behav Anal.

VL - 20

IS - 1

N2 - Verbal prompting and graduated physical guidance procedures were found to substantially increase independent and social play in two interrelated experiments with eight profoundly mentally retarded adults. Independent and social play remained in the subjects' repertoire for 12 months following termination of programmed maintenance. (Author/JW)

UR - <http://search.proquest.com/docview/63266040?accountid=14701>

L2 - [http://sfx.scholarsportal.info/ottawa?url\\_ver=Z39.88-](http://sfx.scholarsportal.info/ottawa?url_ver=Z39.88-)

2004&rft\_val\_fmt=info:ofi/fmt:kev:mtx:journal&genre=article&sid=ProQ:ProQ%3Aericshell&atitle=Independent+and+Social+Play+among+Profoundly+Mentally+Retarded+Adults%3A+Training%2C+Maintenance%2C+Generalization%2C+and+Long-Term+Follow-

Up.&title=Journal+of+Applied+Behavior+Analysis&issn=&date=1987-01-

01&volume=20&issue=1&spage=23&au=Singh%2C+Nirbhay+N.%3BMillichamp%2C+Jane+C.&isbn=&jtitle=Journal+of+Applied+Behavior+Analysis&bttitle=&rft\_id=info:eric/EJ352498

ER -

TY - RPRT

ID - 2056

T1 - Negotiation and Enactment in Collaborative Pretend Play: Relations to Social Acceptance and Social Cognition

A1 - Doyle, Anna Beth

Y1 - 1986/12/16/

N1 - Availability - Level 1 - Available online, if indexed January 1993 onward

Last updated - 2012-12-14

KW - ERIC

KW - Unsupervised Play Addition

KW - Canada

KW - Negotiation Processes

KW - Quebec (Montreal)

KW - ERIC, Resources in Education (RIE)

KW - Preschool Education

KW - Foreign Countries

KW - Generalization

KW - Communication (Thought Transfer)

KW - Social Cognition

KW - Pretend Play

KW - Preschool Children

KW - Peer Acceptance

RP - NOT IN FILE

SP - 24

N2 - Examined were the relationships of children's (1) negotiation of play context and (2) enactment of pretend episodes to (3) children's social adjustment, social acceptance and social cognition. It was predicted that negotiation and enactment of pretend play would be relatively independent, and that enactment would be strongly related to indices of social competence. Participants were 30 boys and 32 girls 4- to 5-years-old who attended three day care centers located in urban residential areas of Montreal. Frequencies of pretend play negotiation and enactment were recorded during morning indoor free play periods. Each child was observed for two 20-second focal intervals per play period, for a total of 52 intervals over 1 month. Pretend negotiation and enactment were assessed by recording their occurrence every 5 seconds during each 20-second observation interval. Six measures of social competence were collected: a teacher rating of social adjustment, one teacher and two peer measures of peer popularity, and two measures of social cognitive skill. Findings indicated that negotiation and enactment were positively correlated. In addition, negotiation and enactment correlated with indices of peer popularity. Enactment was generally more highly correlated with popularity than negotiation was. Despite significant between-center variability, findings were generally replicated across centers. (Forty-four references are provided). (Author/RH)

UR - <http://search.proquest.com/docview/63252205?accountid=14701>

L2 - [http://sfx.scholarsportal.info/ottawa?url\\_ver=Z39.88-2004&rft\\_val\\_fmt=info:ofi/fmt:kev:mtx:book&genre=unknown&sid=ProQ:ERIC&atitle=&title=Negotiation+and+Enactment+in+Collaborative+Pretend+Play%3A+Relations+to+Social+Acceptance+and+Social+Cognition.&issn=&date=1986-12-16&volume=&issue=&spage=24&au=Doyle%2C+Anna-Beth&isbn=&jtitle=&bttitle=Negotiation+and+Enactment+in+Collaborative+Pretend+Play%3A+Relations+to+Social+Acceptance+and+Social+Cognition.&rft\\_id=info:eric/ED279412](http://sfx.scholarsportal.info/ottawa?url_ver=Z39.88-2004&rft_val_fmt=info:ofi/fmt:kev:mtx:book&genre=unknown&sid=ProQ:ERIC&atitle=&title=Negotiation+and+Enactment+in+Collaborative+Pretend+Play%3A+Relations+to+Social+Acceptance+and+Social+Cognition.&issn=&date=1986-12-16&volume=&issue=&spage=24&au=Doyle%2C+Anna-Beth&isbn=&jtitle=&bttitle=Negotiation+and+Enactment+in+Collaborative+Pretend+Play%3A+Relations+to+Social+Acceptance+and+Social+Cognition.&rft_id=info:eric/ED279412)  
ER -

TY - JOUR

ID - 2057

T1 - Children's Play and Self-Education

A1 - Gehlbach,Roger D.

Y1 - 1986///

KW - ERIC

KW - Unsupervised Play Addition

KW - Play Learning

KW - ERIC,Current Index to Journals in Education (CIJE)

KW - Practitioners

KW - Early Childhood Education

KW - Elementary Secondary Education

KW - Play

KW - Cognitive Development

KW - Independent Study

KW - Educational Administration

KW - Simulation

KW - Autoinstructional Aids

RP - NOT IN FILE

SP - 203

EP - 213

JF - Curriculum Inquiry

VL - 16

IS - 2

N2 - Children's instructional play and adults' self-education are activities characterized by learning without conventional teaching and by interactional variables. Because both child and adult perceive that they have learned "on their own," play as a form of "curriculum" may serve as an important simulation for later, self-directed learning. (29 references) (CJH)

UR - <http://search.proquest.com/docview/63333915?accountid=14701>

L2 - [http://sfx.scholarsportal.info/ottawa?url\\_ver=Z39.88-2004&rft\\_val\\_fmt=info:ofi/fmt:kev:mtx:journal&genre=article&sid=ProQ:ProQ%3Aericshell&atitle=Children%27s+Play+and+Self-Education.&title=Curriculum+Inquiry&issn=&date=1986-01-01&volume=16&issue=2&spage=203&au=Gehlbach%2C+Roger+D.&isbn=&jtitle=Curriculum+Inquiry&bttitle=&rft\\_id=info:eric/EJ337461](http://sfx.scholarsportal.info/ottawa?url_ver=Z39.88-2004&rft_val_fmt=info:ofi/fmt:kev:mtx:journal&genre=article&sid=ProQ:ProQ%3Aericshell&atitle=Children%27s+Play+and+Self-Education.&title=Curriculum+Inquiry&issn=&date=1986-01-01&volume=16&issue=2&spage=203&au=Gehlbach%2C+Roger+D.&isbn=&jtitle=Curriculum+Inquiry&bttitle=&rft_id=info:eric/EJ337461)  
ER -

TY - JOUR

ID - 2058

T1 - Managing Small Group Instruction in an Integrated Preschool Setting

A1 - O'Connell,Joanne Curry

Y1 - 1986///

KW - ERIC

KW - Unsupervised Play Addition

KW - ERIC,Current Index to Journals in Education (CIJE)

KW - Practitioners

KW - Preschool Education

KW - Play

KW - Individualized Instruction

KW - Disabilities

KW - Mainstreaming

RP - NOT IN FILE

SP - 166

EP - 171

JF - TEACHING Exceptional Children

VL - 18

IS - 3

N2 - A structured small group instructional setting helps to teach mainstreamed handicapped preschoolers the skills necessary to interact with the classroom materials without direct supervision. Examples are cited of individualized play activities with puzzles, paint, and play dough. (CL)

UR - <http://search.proquest.com/docview/63324082?accountid=14701>

L2 - [http://sfx.scholarsportal.info/ottawa?url\\_ver=Z39.88-](http://sfx.scholarsportal.info/ottawa?url_ver=Z39.88-)

2004&rft\_val\_fmt=info:ofi/fmt:kev:mtx:journal&genre=article&sid=ProQ:ProQ%3Aericshell&atitle=Managing+Small+Group+Instruction+in+an+Integrated+Preschool+Setting.&title=Teaching+Exceptional+Children&issn=&date=1986-01-

01&volume=18&issue=3&spage=166&au=O%27Connell%2C+Joanne+Curry&isbn=&jtitle=Teaching+Exceptional+Children&btitle=&rft\_id=info:eric/EJ331510

ER -

TY - RPRT

ID - 2059

T1 - Father Involvement, Sex-Typing and the Toy Play of Children

A1 - Adubato, Susan A.

Y1 - 1985/08//

N1 - Availability - Level 2 - Produced in microfiche (1966-2003)

SuppNotes - Paper presented at the Annual Convention of the American Psychological Association (93rd, Los Angeles, CA, August 23-27, 1985)

Last updated - 2012-12-14

KW - ERIC

KW - Unsupervised Play Addition

KW - ERIC, Resources in Education (RIE)

KW - Researchers

KW - Sex Role

KW - Play

KW - Parent Influence

KW - Parent Child Relationship

KW - Sex Differences

KW - Father Attitudes

KW - Toys

KW - Fathers

KW - CHILDREN

RP - NOT IN FILE

SP - 18

N2 - Children are encouraged early in life to adopt socially appropriate sex-role activities and behaviors. Parents influence their children's behavior and attitudes through the toys they choose for the children and the toy play they sanction. The term androgynous is used to indicate the blending of masculine and feminine characteristics. This study examines the effects of the degree of father involvement on sex-role orientation of the fathers and the children and on the child's sex-typed toy play. It was hypothesized that increased father involvement would reduce sex-role classification. Participants included 90 4-year-old children enrolled in day care and their parents who were of middle to upper middle socioeconomic status. Both parents filled out independent descriptions of typical weeks of their children. From this, the families were classified as high or low in father involvement. Using the Children's Sex-Role Inventory (CSRI), children were classified as androgynous, masculine, feminine, or undifferentiated based on their toy preferences. Results suggested no direct relationship between father involvement and cross-sexed toy play. The study is limited for two reasons:

the total degree of father involvement was low and most of the children spent a large portion of their week in day care. Further study might examine fathers who are prime caregivers. (ABL)

UR - <http://search.proquest.com/docview/63322589?accountid=14701>

ER -

TY - JOUR

ID - 2060

T1 - Increasing Simple Toy Play in Profoundly Mentally Handicapped Children. I. Training to Play

A1 - Murphy,G.

Y1 - 1985///

KW - ERIC

KW - Unsupervised Play Addition

KW - ERIC,Current Index to Journals in Education (CIJE)

KW - Severe Mental Retardation

KW - Play

KW - Behavior Modification

KW - Training Methods

KW - Toys

RP - NOT IN FILE

SP - 375

EP - 388

JF - Journal of Autism and Developmental Disorders

VL - 15

IS - 4

N2 - Twenty profoundly retarded children (mean chronological age 14 years) were trained to play with ordinary toys, half by behavior modification and half by a control procedure. Operant training led to some increases in total toy contact but was not significantly more effective than the control technique in promoting independent constructive play. (Author/CL)

UR - <http://search.proquest.com/docview/63313023?accountid=14701>

L2 - [http://sfx.scholarsportal.info/ottawa?url\\_ver=Z39.88-](http://sfx.scholarsportal.info/ottawa?url_ver=Z39.88-)

2004&rft\_val\_fmt=info:ofi/fmt:kev:mtx:journal&genre=article&sid=ProQ:ProQ%3Aericshell&atitle=Increasing+Simple+Toy+Play+in+Profoundly+Mentally+Handicapped+Children.+I.+Training+to+Play.&title=Journal+of+Autism+and+Developmental+Disorders&issn=&date=1985-01-01&volume=15&issue=4&spage=375&au=Murphy%2C+G.&isbn=&jtitle=Journal+of+Autism+and+Developmental+Disorders&bttitle=&rft\_id=info:eric/EJ329695

ER -

TY - BOOK

ID - 2061

T1 - Play, Language, and Stories: The Development of Children's Literate Behavior

A1 - Galda,Lee

A1 - Pellegrini,Anthony D.

Y1 - 1985///

N1 - Availability - Level 3 - Indexed only

Last updated - 2012-12-14

KW - ERIC

KW - Unsupervised Play Addition

KW - ERIC,Resources in Education (RIE)

KW - Preschool Education

KW - Language Usage

KW - Language Research

KW - Language Acquisition

KW - Role Playing

KW - Early Reading

KW - Discourse Analysis

KW - Knowledge Level

KW - Parent Child Relationship  
 KW - Family Role  
 KW - Social Development  
 KW - Preschool Children  
 KW - Linguistics  
 KW - Play  
 KW - Language Skills  
 KW - Reading Skills  
 KW - Second Language Learning  
 KW - Reading Comprehension  
 KW - Language Processing  
 KW - Beginning Reading  
 KW - Cognitive Processes  
 KW - Speech Acts  
 KW - Sociolinguistics  
 KW - Child Language  
 KW - Structural Analysis (Linguistics)  
 RP - NOT IN FILE  
 SP - 188

PB - Ablex Publishing Corporation, 355 Chestnut St., Norwood, NJ 07648 (\$29.95).

N2 - The question of the relationship between children's play and more formal, literate uses of language is explored in the 9 studies described in this volume. Chapter titles and authors are as follows: (1) "The Influence of Discourse Content and Context on Preschoolers' Use of Language" (Lucia A. French, Joan Lucariello, Susan Seidman, and Katherine Nelson); (2) "Being and Becoming: The Interface of Language and Family Role Knowledge in the Pretend Play of Young African American Girls" (Vonnie C. McLoyd, Shirley Aisha Ray, and Gwendolyn Etter-Lewis); (3) "Narratives in Preschoolers' Sociodramatic Play: The Role of Knowledge and Communicative Competence" (Jacqueline Sachs, Jane Goldman, and Christine Chaille); (4) "The Origins of Autonomous Texts in Play Boundaries" (Dennis P. Wolf and James Pusch); (5) "Relations Between Preschool Children's Symbolic Play and Literate Behavior" (Anthony D. Pellegrini); (6) "Preschool Children's Narratives: Linking Story Comprehension, Production, and Play Discourse" (Marilyn Guttman and Carl H. Frederiksen); (7) "Play Beyond Play: Its Role in Formal Informative Speech" (Mary Ann Evans); (8) "Narrative Play in Second Language Learning" (Shirley Brice Heath with Hey-Kyeong Chin); and (9) "Assessing Children's Knowledge About Book Reading" (Catherine Snow, Debra Nathan, and Rivka Perlman). Author and subject indexes are included. (EL)

SN - 0893912921

UR - <http://search.proquest.com/docview/63293095?accountid=14701>

L2 - [http://sfx.scholarsportal.info/ottawa?url\\_ver=Z39.88-2004&rft\\_val\\_fmt=info:ofi/fmt:kev:mtx:book&genre=book&sid=ProQ:ERIC&atitle=&title=Play%2C+Language%2C+and+Stories%3A+The+Development+of+Children%27s+Literate+Behavior.&issn=&date=1985-01-01&volume=&issue=&spage=188&au=Galda%2C+Lee%3BPellegrini%2C+Anthony+D.&isbn=0893912921&jtitle=&bttitle=Play%2C+Language%2C+and+Stories%3A+The+Development+of+Children%27s+Literate+Behavior.&rft\\_id=info:eric/ED265555](http://sfx.scholarsportal.info/ottawa?url_ver=Z39.88-2004&rft_val_fmt=info:ofi/fmt:kev:mtx:book&genre=book&sid=ProQ:ERIC&atitle=&title=Play%2C+Language%2C+and+Stories%3A+The+Development+of+Children%27s+Literate+Behavior.&issn=&date=1985-01-01&volume=&issue=&spage=188&au=Galda%2C+Lee%3BPellegrini%2C+Anthony+D.&isbn=0893912921&jtitle=&bttitle=Play%2C+Language%2C+and+Stories%3A+The+Development+of+Children%27s+Literate+Behavior.&rft_id=info:eric/ED265555)

ER -

TY - JOUR

ID - 2062

T1 - Improving Independent Engagement of Nonambulatory Multihandicapped Persons through the Systematic Analysis of Leisure Materials

A1 - Jones, Michael L.

Y1 - 1984///

KW - ERIC

KW - Unsupervised Play Addition

KW - ERIC, Current Index to Journals in Education (CIJE)

KW - Play

KW - Institutionalized Persons

KW - Environmental Influences

KW - Multiple Disabilities

KW - Leisure Time

KW - Severe Disabilities

KW - Intervention

KW - Toys

KW - Behavior Change

RP - NOT IN FILE

SP - 313

EP - 332

JF - Analysis and Intervention in Developmental Disabilities

VL - 4

IS - 4

N2 - Research conducted in an institutional living environment during times when program activities were minimal and clients were typically inactive showed that empirically based toy selection, construction, and modification, and environmental engineering to ensure convenient and constant material availability increased Ss' active engagement with toys. (Author/CL)

UR - <http://search.proquest.com/docview/63380467?accountid=14701>

L2 - [http://sfx.scholarsportal.info/ottawa?url\\_ver=Z39.88-](http://sfx.scholarsportal.info/ottawa?url_ver=Z39.88-)

2004&rft\_val\_fmt=info:ofi/fmt:kev:mtx:journal&genre=article&sid=ProQ:ProQ%3Aericshell&atitle=Improving+Independent+Engagement+of+Nonambulatory+Multihandicapped+Persons+through+the+Systematic+Analysis+of+Leisure+Materials.&title=Analysis+and+Intervention+in+Developmental+Disabilities&issn=&date=1984-01-

01&volume=4&issue=4&spage=313&au=Jones%2C+Michael+L.&isbn=&jtitle=Analysis+and+Intervention+in+Developmental+Disabilities&bttitle=&rft\_id=info:eric/EJ320989

ER -

TY - RPRT

ID - 2063

T1 - When Play Is Learning: A School Designed for Self-Directed Education

A1 - Gray,Peter

A1 - Chanoff,David

Y1 - 1984///

N1 - Last updated - 2012-12-14

KW - ERIC

KW - Unsupervised Play Addition

KW - Sudbury Valley School MA

KW - ERIC,Current Index to Journals in Education (CIJE)

KW - Elementary Secondary Education

KW - Free Schools

KW - Play

KW - Educational Principles

KW - Independent Study

KW - Open Education

KW - Cultural Education

KW - Nontraditional Education

KW - Private Schools

KW - Student Centered Curriculum

RP - NOT IN FILE

SP - 608

EP - 611

N2 - The school described here operates on the principle that play for the sake of play, without unsolicited adult intervention, entails the acquisition of skills and knowledge. Sudbury Valley School promotes cultural acquisition in a manner harmonious with the child's biological self-education system, without age segregation, grading, or academic requirements. (MJL)

UR - <http://search.proquest.com/docview/63457179?accountid=14701>



L2 - [http://sfx.scholarsportal.info/ottawa?url\\_ver=Z39.88-2004&rft\\_val\\_fmt=info:ofi/fmt:kev:mtx:book&genre=unknown&sid=ProQ:ERIC&atitle=&title=When+Play+Is+Learning%3A+A+School+Designed+for+Self-Directed+Education.&issn=&date=1984-01-01&volume=&issue=&spage=608&au=Gray%2C+Peter%3BChanoff%2C+David&isbn=&jtitle=&bttitle=When+Play+Is+Learning%3A+A+School+Designed+for+Self-Directed+Education.&rft\\_id=info:eric/EJ298056](http://sfx.scholarsportal.info/ottawa?url_ver=Z39.88-2004&rft_val_fmt=info:ofi/fmt:kev:mtx:book&genre=unknown&sid=ProQ:ERIC&atitle=&title=When+Play+Is+Learning%3A+A+School+Designed+for+Self-Directed+Education.&issn=&date=1984-01-01&volume=&issue=&spage=608&au=Gray%2C+Peter%3BChanoff%2C+David&isbn=&jtitle=&bttitle=When+Play+Is+Learning%3A+A+School+Designed+for+Self-Directed+Education.&rft_id=info:eric/EJ298056)  
ER -

TY - RPRT

ID - 2064

T1 - Competence, Gender and Preschooler's Free Play Choices When a Microcomputer Is Present in the Classroom

A1 - Lipinski, Judith M.

Y1 - 1984///

N1 - Availability - Level 1 - Available online, if indexed January 1993 onward

SuppNotes - Product of the Children and Technology Project (CAT)

Last updated - 2012-12-14

KW - ERIC

KW - Unsupervised Play Addition

KW - Choice Behavior

KW - ERIC, Resources in Education (RIE)

KW - Preschool Education

KW - Time Factors (Learning)

KW - Play

KW - Microcomputers

KW - Competence

KW - Sex Differences

KW - Preschool Children

RP - NOT IN FILE

SP - 22

N2 - The proliferation of microcomputers in early childhood education has raised concerns about the computer's effects on the preschool curriculum. Of particular concern is the possibility that children will interact with the computer to the exclusion of other important activities. To examine this issue, a two-study project investigated children's activity choices in a 1-hour free-play period. Gender, competence, and free-play areas were the independent variables. The first study involved a class of 4-year-old children at a university-based nursery school; a class of 4-year-olds attending a university day care center participated in the second study. A microcomputer and age-appropriate software were placed in each classroom according to the following schedule of treatment weeks: baseline, computer-noninteractive (omitted in the second study), computer-interactive, and computer-interactive/teacher-interactive. The presence of the microcomputer initially disrupted children's free-play choices. After several weeks, children's free-play patterns returned to baseline levels. In the first study, it was found that girls spent more time at the computer than did boys; however, no significant sex differences were found in the second study. In both, children judged to have high and medium levels of competence spent equal amounts of time at the computer. (Author/RH)

UR - <http://search.proquest.com/docview/63444909?accountid=14701>

L2 - [http://sfx.scholarsportal.info/ottawa?url\\_ver=Z39.88-2004&rft\\_val\\_fmt=info:ofi/fmt:kev:mtx:book&genre=unknown&sid=ProQ:ERIC&atitle=&title=Competence%2C+Gender+and+Preschooler%27s+Free+Play+Choices+When+a+Microcomputer+Is+Present+in+the+Classroom.&issn=&date=1984-01-01&volume=&issue=&spage=22&au=Lipinski%2C+Judith+M&isbn=&jtitle=&bttitle=Competence%2C+Gender+and+Preschooler%27s+Free+Play+Choices+When+a+Microcomputer+Is+Present+in+the+Classroom.&rft\\_id=info:eric/ED243609](http://sfx.scholarsportal.info/ottawa?url_ver=Z39.88-2004&rft_val_fmt=info:ofi/fmt:kev:mtx:book&genre=unknown&sid=ProQ:ERIC&atitle=&title=Competence%2C+Gender+and+Preschooler%27s+Free+Play+Choices+When+a+Microcomputer+Is+Present+in+the+Classroom.&issn=&date=1984-01-01&volume=&issue=&spage=22&au=Lipinski%2C+Judith+M&isbn=&jtitle=&bttitle=Competence%2C+Gender+and+Preschooler%27s+Free+Play+Choices+When+a+Microcomputer+Is+Present+in+the+Classroom.&rft_id=info:eric/ED243609)  
ER -

TY - RPRT

ID - 2065

T1 - The Effect of Dramatic Play on the Story Retellings of Second Grade Children

A1 - Galda, Lee

A1 - Miller,Michael

Y1 - 1983/04//

N1 - Availability - Level 1 - Available online, if indexed January 1993 onward

SuppNotes - Paper presented at the Annual Meeting of the American Educational Research Association (Montreal, Canada, April 11-14, 1983)

Last updated - 2012-12-14

KW - ERIC

KW - Unsupervised Play Addition

KW - Constructs

KW - Piagetian Theory

KW - ERIC,Resources in Education (RIE)

KW - Researchers

KW - Grade 2

KW - Primary Education

KW - Elementary School Students

KW - Competence

KW - Language Skills

KW - Dramatic Play

KW - Narration

RP - NOT IN FILE

SP - 10

N2 - Effects of dramatic play on children's narrative competence were investigated among 36 second-graders. Children were read a familiar folktale and then "played" the story, discussed it, or drew a picture about it. They were then asked to retell the story either to an informed or to a naive listener. It was hypothesized that (1) more "evaluative" elaborative devices would be found in stories retold to a naive listener than in stories told to an informed listener and (2) more such devices would be found in the retellings of children in the play condition than in the other two conditions. Independent variables were sex, listener, and condition. Dependent variables were number of words, number of evaluative clauses, number of evaluative syntactic devices, and ratios of evaluative devices to number of words. Narrative competence was assessed by measuring the number of evaluative devices present in the retellings, and data were analyzed using a three-way multiple analysis of variance. The finding of no significant effects may be seen as support for Piaget's model of play, in which effects of play decrease in school-age children. The lack of significant results also indicates that narrative competence may not be a unitary construct. Subjects exhibited differences in the cohesive features of their language but not in their use of evaluative markers. It was concluded that various instruments may measure markedly different aspects of narrative competence. (RH)

UR - <http://search.proquest.com/docview/63409096?accountid=14701>

L2 - [http://sfx.scholarsportal.info/ottawa?url\\_ver=Z39.88-](http://sfx.scholarsportal.info/ottawa?url_ver=Z39.88-)

2004&rft\_val\_fmt=info:ofi/fmt:kev:mtx:book&genre=unknown&sid=ProQ:ERIC&atitle=&title=The+Effect+of+Dramatic+Play+on+the+Story+Retellings+of+Second+Grade+Children.&issn=&date=1983-04-

01&volume=&issue=&spage=10&au=Galda%2C+Lee%3BMiller%2C+Michael&isbn=&jtitle=&bttitle=The+Effect+of+Dramatic+Play+on+the+Story+Retellings+of+Second+Grade+Children.&rft\_id=info:eric/ED233812

ER -

TY - RPRT

ID - 2066

T1 - The Effect of Dramatic Play on Children's Generation of Cohesive Text

A1 - Pellegrini,D.A.

Y1 - 1983/04//

N1 - Availability - Level 1 - Available online, if indexed January 1993 onward

SuppNotes - Paper presented at the Annual Meeting of the American Educational Research Association (Montreal, Canada, April 11-14, 1983)

Last updated - 2012-12-14

KW - ERIC

KW - Unsupervised Play Addition

KW - ERIC,Resources in Education (RIE)

KW - Primary Education

KW - Kindergarten Children  
 KW - Elementary School Students  
 KW - Oral Language  
 KW - Freehand Drawing  
 KW - Dramatic Play  
 KW - Discussion  
 KW - Story Telling  
 KW - Recall (Psychology)  
 KW - Verbal Ability  
 KW - Child Language  
 RP - NOT IN FILE  
 SP - 25

N2 - The extent to which children's cohesive oral text varied as a function of listener status and the extent to which children could be trained to generate decontextualized oral text was examined in a study of children in kindergarten through second grade. Independent variables were children's age; exposure to a play, discussion, or drawing condition; and the naive or informed status of the audience to which a story was retold. The dependent measure consisted of individual children's oral texts, generated on a recall task. Recall was scored for cohesion according to endophoric or exophoric reference and ellipsis. Endophorics are defined as linguistically encoded ties between the presupposed element and the presupposing element (e.g., "John's here. He'll leave later."). Exophorics rely on context or unencoded assumptions to convey meaning (e.g., the statement "It's nice," when "it" is defined by the speaker's pointing to an object). Reference is composed of three subcategories: pronominals, demonstratives, and comparatives. Ellipsis is also composed of three subcategories: nominal, verbal, and causal ellipsis. Children assigned to same-age groups of four were read children's books on three occasions. Following the readings, subjects were exposed to their respective treatments, then were asked to retell the story to a naive or informed listener. Results supported the proposition that children's register is affected by participants in discourse. Additionally, dramatic play appeared to be a context within which children learn to put meaning into words. (RH)

UR - <http://search.proquest.com/docview/63513794?accountid=14701>

L2 - [http://sfx.scholarsportal.info/ottawa?url\\_ver=Z39.88-2004&rft\\_val\\_fmt=info:ofi/fmt:kev:mtx:book&genre=unknown&sid=ProQ:ERIC&atitle=&title=The+Effect+of+Dramatic+Play+on+Children%27s+Generation+of+Cohesive+Text.&issn=&date=1983-04-01&volume=&issue=&spage=25&au=Pellegrini%2C+D.+A.&isbn=&jtitle=&btittle=The+Effect+of+Dramatic+Play+on+Children%27s+Generation+of+Cohesive+Text.&rft\\_id=info:eric/ED227964](http://sfx.scholarsportal.info/ottawa?url_ver=Z39.88-2004&rft_val_fmt=info:ofi/fmt:kev:mtx:book&genre=unknown&sid=ProQ:ERIC&atitle=&title=The+Effect+of+Dramatic+Play+on+Children%27s+Generation+of+Cohesive+Text.&issn=&date=1983-04-01&volume=&issue=&spage=25&au=Pellegrini%2C+D.+A.&isbn=&jtitle=&btittle=The+Effect+of+Dramatic+Play+on+Children%27s+Generation+of+Cohesive+Text.&rft_id=info:eric/ED227964)

ER -

TY - JOUR

ID - 2067

T1 - Solitary Play: Social Immaturity or Autonomous Achievement Striving?

A1 - Barnes,M.G.

Y1 - 1981/09//

KW - ERIC

KW - Unsupervised Play Addition

KW - Autonomy (Personal)

KW - Solitary Play

KW - ERIC,Current Index to Journals in Education (CIJE)

KW - Early Childhood Education

KW - Play

KW - Social Development

KW - Preschool Children

KW - Maturity (Individuals)

RP - NOT IN FILE

SP - 12

EP - 15

JF - Australian Journal of Early Childhood

VL - 6

IS - 3

N2 - Traces the concept of solitary play through a review of the available research, queries whether solitary play is an indicator of social immaturity or autonomous achievement striving, and calls for further research in this area. (Author/MP)

UR - <http://search.proquest.com/docview/63561380?accountid=14701>

L2 - [http://sfx.scholarsportal.info/ottawa?url\\_ver=Z39.88-](http://sfx.scholarsportal.info/ottawa?url_ver=Z39.88-)

2004&rft\_val\_fmt=info:ofi/fmt:kev:mtx:journal&genre=article&sid=ProQ:ProQ%3Aericshell&atitle=Solitary+Play%3A+Social+Immaturity+or+Autonomous+Achievement+Striving%3F&title=Australian+Journal+of+Early+Childhood&issn=&date=1981-09-

01&volume=6&issue=3&spage=12&au=Barnes%2C+M.+G.&isbn=&jtitle=Australian+Journal+of+Early+Childhood&bttitle=&rft\_id=info:eric/EJ255247

ER -

TY - RPRT

ID - 2068

T1 - Play Styles in Early Childhood: Continuity and Change as a Function of Sex

A1 - Fagot, Beverly I.

Y1 - 1979/06//

N1 - Availability - Level 1 - Available online, if indexed January 1993 onward

SuppNotes - Paper presented at the meeting of the International Society for the Study of Behavioural Development (Lund, Sweden, June 25-29, 1979)

Last updated - 2012-12-14

KW - ERIC

KW - Unsupervised Play Addition

KW - ERIC, Resources in Education (RIE)

KW - Social Reinforcement

KW - Teacher Influence

KW - Play

KW - MALES

KW - Behavior Patterns

KW - Peer Influence

KW - Sex Differences

KW - Females

KW - Preschool Children

KW - SOCIALIZATION

KW - Sex Stereotypes

RP - NOT IN FILE

SP - 7

N2 - The continuity of play styles of preschool children over a 1-year period was observed and related to teacher and peer reinforcement patterns influenced by sex stereotypes. Sixty-seven children, aged 18 months to 58 months, were observed in a natural setting using a behavior checklist consisting of 33 child behavior categories and 15 teacher- and peer-reaction categories. Each child in the study was observed for at least 40 hours, with 12 observations per hour. Data from the upper and lower 25% of the children on each of seven factors (derived from a factor analysis of the 33 behavior scores) were examined for continuity between the first and last 10 weeks of the children's participation in the study. The results indicate that certain play styles show stability for all children, while others change over time. The behaviors which change are those behaviors for which peers or teachers are giving an unusual amount of feedback to one group of children. For example, teachers had an extremely high rate of initiation activity towards passive children. Also, peers successfully exerted pressure to change a child's behavior, as in the case of boys who were initially low on male-preferred or high on female-preferred activities. Peers did not, however, exert negative pressure on girls who were high on the male-preferred activities or low on the female-preferred activities. Such girls show high stability in play style even though their behavior does not fit the traditional stereotypes. On the other hand, teachers gave girls with high activity levels more negative feedback, and these girls show low stability on this factor. Participation in solitary activities appears to be independent of feedback. (Author/SS)

UR - <http://search.proquest.com/docview/63659453?accountid=14701>

L2 - [http://sfx.scholarsportal.info/ottawa?url\\_ver=Z39.88-](http://sfx.scholarsportal.info/ottawa?url_ver=Z39.88-)

2004&rft\_val\_fmt=info:ofi/fmt:kev:mtx:book&genre=unknown&sid=ProQ:ERIC&atitle=&title=Play+Styles+i

n+Early+Childhood%3A+Continuity+and+Change+as+a+Function+of+Sex.&issn=&date=1979-06-01&volume=&issue=&spage=7&au=Fagot%2C+Beverly+I.&isbn=&jtitle=&btitle=Play+Styles+in+Early+Childhood%3A+Continuity+and+Change+as+a+Function+of+Sex.&rft\_id=info:eric/ED175562  
ER -

TY - RPRT

ID - 2069

T1 - An Investigation of the Effects of Forms of Imaginative Play on Language Development and Language Comprehension in Young Children

A1 - Yawkey, Margaret L.

A1 - Yawkey, Thomas D.

Y1 - 1979///

N1 - Availability - Level 1 - Available online, if indexed January 1993 onward

Last updated - 2012-12-14

KW - ERIC

KW - Unsupervised Play Addition

KW - ERIC, Resources in Education (RIE)

KW - Primary Education

KW - Language Research

KW - Play

KW - Language Acquisition

KW - Young Children

KW - Dramatic Play

KW - Comprehension

KW - Language Processing

KW - Oral Language

KW - Developmental Stages

KW - Sex Differences

KW - Child Language

RP - NOT IN FILE

SP - 25

N2 - A study investigated the effects of symbolic play treated as a mediator for increasing language comprehension and facilitating oral language growth. The study included two aspects of language: language comprehension and language development. Independent variables were forms of play--puppet action, body action, abstract (imagined) action, and no action (control); age; and sex. Dependent measures were cloze comprehension, 10-item measures for language comprehension, and the students' connected discourse scored t-units for language development. Subjects were 80 five-year-olds and 80 seven-year-olds. After no significant main or interaction effects on preassessment language measure between the factors were found and after the treatments were completed, major findings were as follows: (1) on the cloze measure of language comprehension, children in the body action play group received significantly higher mean scores than did those in the abstract action play and control groups; (2) on the question measure of language comprehension, five-year-olds in the puppet action and body action play groups received significantly higher mean scores than did the five-year-olds in the abstract action and play groups; and (3) on the t-unit measure of language development, the seven-year-olds received significantly higher mean scores than did the five-year-olds. There were no significant effects for sex. (Author/HTH)

UR - <http://search.proquest.com/docview/63217995?accountid=14701>

L2 - [http://sfx.scholarsportal.info/ottawa?url\\_ver=Z39.88-](http://sfx.scholarsportal.info/ottawa?url_ver=Z39.88-)

2004&rft\_val\_fmt=info:ofi/fmt:kev:mtx:book&genre=unknown&sid=ProQ:ERIC&atitle=&btitle=An+Investigation+of+the+Effects+of+Forms+of+Imaginative+Play+on+Language+Development+and+Language+Comprehension+in+Young+Children.&issn=&date=1979-01-

01&volume=&issue=&spage=25&au=Yawkey%2C+Margaret+L.%3BYawkey%2C+Thomas+D.&isbn=&jtitle=&btitle=An+Investigation+of+the+Effects+of+Forms+of+Imaginative+Play+on+Language+Development+and+Language+Comprehension+in+Young+Children.&rft\_id=info:eric/ED284226

ER -

TY - GEN

ID - 2070

T1 - Structural Elements of Symbolic Play of Preschool Children

A1 - Gowen, Jean W.

Y1 - 1978/08//

N1 - Availability - Level 1 - Available online, if indexed January 1993 onward

SuppNotes - Paper presented at the Annual Meeting of the American Psychological Association (86th, Toronto, Canada, August 28-September 1, 1978)

Last updated - 2012-12-14

KW - ERIC

KW - Unsupervised Play Addition

KW - ERIC, Resources in Education (RIE)

KW - Preschool Education

KW - Semiotics

KW - Imagination

KW - Play

KW - Symbolic Language

KW - Research

KW - Pretend Play

KW - Preschool Children

KW - Infants

RP - NOT IN FILE

SP - 17

N2 - The structural elements of the spontaneous symbolic play of 2- and 3-year-olds were compared with those of 4- and 5-year-olds. All 32 children studied were enrolled in a private day care center. Each child was observed during free play in the center for 15 minutes. Three categories of signifiers (animate, inanimate and imaginary) and five modes of representation (enactment, object substitution, symbolic construction, preparatory behavior and comments) were identified. The data were coded in four phases. In the first phase of coding, incidents of symbolic play were identified. During the other three phases of coding, the structural elements, i.e. the signifieds, signifiers, and modes of representation, were identified, coded and counted. Seven transcripts were selected at random to be coded by two independent coders to yield reliability data. Percentage of agreement among coders ranged from 80 to 84 percent. Results suggest that younger children used more symbolic construction, preparation and comments as modes of representation and more animate and imaginary signifiers. Implications of results for Piaget's and Vygotsky's theories of symbolic play are discussed.

(Author/RH)

UR - <http://search.proquest.com/docview/63752500?accountid=14701>

L2 - [http://sfx.scholarsportal.info/ottawa?url\\_ver=Z39.88-](http://sfx.scholarsportal.info/ottawa?url_ver=Z39.88-)

2004&rft\_val\_fmt=info:ofi/fmt:kev:mtx:journal&genre=unknown&sid=ProQ:ProQ%3Aericshell&atitle=Structural+Elements+of+Symbolic+Play+of+Preschool+Children.&title=&issn=&date=1978-08-

01&volume=&issue=&spage=17&au=Gowen%2C+Jean+W.&isbn=&jtitle=&bttitle=&rft\_id=info:eric/ED164127

ER -

TY - GEN

ID - 2071

T1 - The Effects of Action and Violence in Television Programs on the Social Behavior and Imaginative Play of Preschool Children

A1 - Huston-Stein, Aletha

Y1 - 1978/03//

N1 - Availability - Level 1 - Available online, if indexed January 1993 onward

SuppNotes - Paper presented at the meeting of the Southwestern Society for Research in Human Development (Dallas, TX, March 1978). For a related document, see IR 008 192

Last updated - 2012-12-14

KW - ERIC

KW - Unsupervised Play Addition

KW - ERIC, Resources in Education (RIE)

KW - Television Viewing

KW - Psychological Studies

KW - Television Research

KW - Pretend Play

KW - Preschool Children

KW - Aggression

KW - Violence

RP - NOT IN FILE

SP - 18

N2 - The independent contributions of action and violence in television programs to children's attention and social behavior were investigated. Pairs of preschool children were assigned to one of four television conditions (1) high action-high violence, (2) high action-low violence, (3) low action-low violence, or (4) no television. Action was defined as rapid movement by characters or objects; violence was physical aggression by characters. Visual attention was greater in high action than in low action programs; there were no differences in attention as a function of violence when action was controlled. Children were observed in free play sessions before and after viewing. Those who saw low action-low violence television or no television increased in imaginative, fantasy play; those who saw high action-high violence decreased in imaginative play; the high action-low violence group fell in between. There was some tendency for aggressive behavior to follow the opposite pattern--higher aggression following high action-high violence or high action-low violence than after low action-low violence or no television. There were no differences in activity level as a function of treatment. These results were interpreted as supporting arousal theory more strongly than observational learning theory. (Author/JEG)

UR - <http://search.proquest.com/docview/63689795?accountid=14701>

L2 - [http://sfx.scholarsportal.info/ottawa?url\\_ver=Z39.88-](http://sfx.scholarsportal.info/ottawa?url_ver=Z39.88-)

2004&rft\_val\_fmt=info:ofi/fmt:kev:mtx:journal&genre=unknown&sid=ProQ:ProQ%3Aericshell&atitle=The+Effects+of+Action+and+Violence+in+Television+Programs+on+the+Social+Behavior+and+Imaginative+Play+of+Preschool+Children.&title=&issn=&date=1978-03-01&volume=&issue=&spage=18&au=Huston-Stein%2C+Aletha&isbn=&jtitle=&btittle=&rft\_id=info:eric/ED184524

ER -

TY - RPRT

ID - 2073

T1 - Fantasy Play in Child Psychotherapy

A1 - Stollak,Gary E.

Y1 - 1978///

N1 - Availability - Level 1 - Available online, if indexed January 1993 onward

SuppNotes - Paper presented at the Annual Convention of the American Psychological Association (Toronto, Ontario, Canada, August, 1978)

Last updated - 2012-12-14

KW - ERIC

KW - Unsupervised Play Addition

KW - Self Presentation

KW - ERIC,Resources in Education (RIE)

KW - Training

KW - Research Projects

KW - CHILDREN

KW - Developmental Psychology

KW - Creative Expression

KW - Therapists

KW - Maturation

KW - Helping Relationship

KW - Behavior Patterns

KW - Supervision

KW - Pretend Play

KW - Child Psychology

RP - NOT IN FILE

SP - 87

N2 - Relationships among adult and young children's behavior in extended play encounters were examined. One group of normal six-year-old children completed 20 play encounters, while a second group of clinic-referred children completed 15 play encounters. Each child encountered either a trained/supervised or an untrained/unsupervised college undergraduate. Analyses of videotapes made of the "non-directive" play encounters indicated that the children who encountered trained/supervised undergraduates emitted greater numbers of fantasy behaviors, especially those indicative of mature, coping and adaptive functioning than did children encountering untrained/unsupervised undergraduates. Adult involvement in play and allowing the child self-direction seemed key behaviors in eliciting such child behavior. (Author/JLL)

UR - <http://search.proquest.com/docview/63746686?accountid=14701>

ER -

TY - RPRT

ID - 2074

T1 - Enhancing Imaginative Play in Preschoolers: Television and Live Adult Effects

A1 - Singer, Jerome L.

A1 - Singer, Dorothy G.

Y1 - 1974///

N1 - Availability - Level 1 - Available online, if indexed January 1993 onward

Last updated - 2012-12-14

KW - ERIC

KW - Unsupervised Play Addition

KW - Mister Rogers Neighborhood

KW - ERIC, Resources in Education (RIE)

KW - Teacher Influence

KW - Play

KW - Cognitive Development

KW - Responses

KW - Individual Characteristics

KW - Learning Processes

KW - Emotional Development

KW - Imagination

KW - Self Concept

KW - Sex Differences

KW - Television Research

KW - Preschool Children

KW - Educational Television

KW - Aggression

KW - Teaching Methods

RP - NOT IN FILE

SP - 38

N2 - The present study was designed to explore the possibility that exposure to the "Misterogers' Neighborhood" program might increase the likelihood of spontaneous imaginative play in preschool children who watched the program over a period of two weeks. The specific focus of this investigation was to determine whether a well-produced professional program would be more effective in enhancing imaginative play than instruction from a live adult. The study involved four varied conditions: (1) a non TV-viewing control group observed in spontaneous play on two occasions separated in time by a period comparable to that taken up by the experimental conditions; (2) a group who watched the Misterogers' show daily over a two-week period; (3) a group who watched the same show daily in the company of an adult who interacted with the children about content of the performance; and (4) a group who saw no television at school but received a comparable daily time period of fantasy game-playing and practice in imagery with an adult teacher. An analysis of the matrix of intercorrelations between the independent and dependent variables of the study seems to suggest that children in the 3- to 4-year-old age group remain most susceptible to influence by a concerned adult in their presence who can engage them directly and provide them with immediate feedback for their own responses. It is therefore likely that at the very least, television's prosocial or optimal cognitive benefits may have to depend on some mediation by an adult. (Author/CS)

UR - <http://search.proquest.com/docview/64045586?accountid=14701>



ER -

TY - GEN

ID - 2075

T1 - The Effects of Viewed Aggression on the Group Play of Children

A1 - Ross, Lee B.

Y1 - 1972/05//

N1 - Availability - Level 1 - Available online, if indexed January 1993 onward

SuppNotes - Paper presented at Midwestern Psychological Association Meeting, May 4-6, 1972, Cleveland, Ohio

Last updated - 2012-12-14

KW - ERIC

KW - Unsupervised Play Addition

KW - ERIC, Resources in Education (RIE)

KW - Groups

KW - Television Viewing

KW - Play

KW - Behavior

KW - Television

KW - Group Behavior

KW - CHILDREN

KW - Aggression

KW - Violence

RP - NOT IN FILE

SP - 25

N2 - The present investigation extended the methodology to investigate the effects of viewed aggression on groups of two and four children. The present study employed a 2 x 2 x 3 factorial design, using as independent variables sex of the child, group size (two or four children), and cartoon condition (aggressive cartoon, nonaggressive cartoon, and no cartoon). Forty-eight boys and 48 girls of kindergarten age were randomly assigned to the experimental groups. A factor analysis of the dependent measures identified four factors, accounting for 85 percent of the total variance, each of which responded differently to the independent variables. The finding that (a) transgressive-aggression was not affected by viewing aggressive cartoons, and (b) that normative-aggression loads on the same factor as normative-play, rejects the assumption that aggression is a single class of behavior and rejects the hypothesis that the effect of viewing aggressive models reduce inhibitions against aggression. The results are interpreted in terms of factors affecting levels of activity.

(Author)

UR - <http://search.proquest.com/docview/64241319?accountid=14701>

ER -

TY - GEN

ID - 2076

T1 - The Influence of Ability Level and Materials on Classificatory and Imaginative Behavior in Free Play

A1 - Phinney, Jean

Y1 - 1972///

N1 - Availability - Level 1 - Available online, if indexed January 1993 onward

Last updated - 2012-12-14

KW - ERIC

KW - Unsupervised Play Addition

KW - ERIC, Resources in Education (RIE)

KW - Preschool Education

KW - Research Reports

KW - Play

KW - Cognitive Development

KW - Observation

KW - Creativity

KW - Manipulative Materials

KW - Imagination

KW - Cognitive Ability

KW - Object Manipulation

KW - Classification

KW - Preschool Children

KW - Age Differences

RP - NOT IN FILE

SP - 37

N2 - A dissertation proposal involved a study to observe spontaneous behavior of children in interaction with materials in order to gain understanding of the factors that influence classificatory and imaginative behavior in free play. Children at two levels of ability in terms of classification skills were observed in interaction with materials at two levels of complexity during four play sessions. Materials were two related sets of specially designed blocks defined as simple or complex on the basis of the variations and the possible combinations among individual members of the set. The 3- to 6-year-olds were to play in pairs to simulate the social play typical of children in natural situations. Observation focused on free classification, creative or design behavior, imaginative behavior or variety of themes. A final measure was used to determine the effect of interaction with the materials on classification ability. Results consisted of observational data from the experimental sessions and posttest scores. Non-definitive results indicated replicating the experiment with modifications. It was not feasible to use pairs as the experimental unit, so one child at a time was observed. Interaction between ability and complexity of blocks was found in testing, but not in observed behavior. No interaction effects with age or ability were observed. A revised study is proposed involving age as the independent variable and redesigned materials. (KM)

UR - <http://search.proquest.com/docview/64172231?accountid=14701>

ER -

TY - GEN

ID - 2077

T1 - Play Behavior and Efficacy in Ghetto Four-Year-Olds: Organization and Psychosexual Content of Play

A1 - Borowitz, Gene H.

Y1 - 1970///

N1 - Availability - Level 1 - Available online, if indexed January 1993 onward

Last updated - 2012-12-14

KW - ERIC

KW - Unsupervised Play Addition

KW - Efficacy

KW - Play Session Behavior Scale (Hirsch et al)

KW - Psychosexual Content of Play Scale (Borowitz)

KW - ERIC, Resources in Education (RIE)

KW - Interaction

KW - Behavior Rating Scales

KW - Play

KW - Ghettos

KW - Interpersonal Competence

KW - Sex Differences

KW - Child Development

KW - Black Youth

KW - Observation

KW - Preschool Children

KW - Behavioral Science Research

RP - NOT IN FILE

SP - 31

N2 - Effectance, defined as the child's independent, effective interaction with people and things, is studied through observation of the play of 36 preschool low income black children. The children were observed and filmed in semi-structured play sessions, primarily with family dolls, doll furniture, and small baby bottle. Instruments used were: (1) the Play Session Behavior Scale, which includes 22 variables defining organization, involvement, and interpersonal responsiveness in play, and (2) the Psychosexual Content of Play Scale, which

includes 13 variables defining the amount of content reflecting each of the five early psychosexual stages of development. It is concluded that: (a) Effective functioning as a learner at age 4 requires skills which became crystallized during the Anal Retentive stage, such as the ability to persist in tasks, take pleasure in accomplishments, and look for rules and order; and (b) Optimal functioning as a learner at age 4 is facilitated by skills arising out of the Phallic stage, such as curiosity, self-assertion, and an emerging sense of where one fits in the social order. Statistical tables and an appendix consisting of the instruments and rater's manual used comprise almost half of the document. (Author/NH)

UR - <http://search.proquest.com/docview/64302405?accountid=14701>

ER -

TY - GEN

ID - 2078

T1 - Characterization of the Effect of Space, Materials, and Teacher Behavior on Preschool Children's Free Play Activity Patterns. Research Report No. 1

A1 - Holt,Carol

A1 - Boger,Robert P.

Y1 - 1969/11//

N1 - Availability - Level 1 - Available online, if indexed January 1993 onward

Last updated - 2012-12-14

KW - ERIC

KW - Unsupervised Play Addition

KW - ERIC,Resources in Education (RIE)

KW - Instructional Materials

KW - Play

KW - Research Needs

KW - Classroom Observation Techniques

KW - Behavior Patterns

KW - Recreational Activities

KW - Space Utilization

KW - Individual Activities

KW - Preschool Children

RP - NOT IN FILE

SP - 22

N2 - The object of this study was to determine the extent to which children displayed predictable, recurring patterns of behavior when engaged in self-selected activities. Subjects were four girls and three boys, 4 years of age, all from middle class urban families. The classroom's free play space was divided into four equal areas. Toys were divided into four groups: art materials, blocks, dramatic toys, and manipulative toys and books. Each day the toy groups were randomly assigned to the four areas, with each free play session being videotaped simultaneously from two directions. Observer recordings of each child's movements and the toys he used were summarized, coded, and analyzed. Significant differences were found in the time spent by children in specific physical locations. These differences were related to the nature of the area and the proximity of the play materials to the teacher. Children tended to choose play materials that could be moved to another area of the room. Differences in the nature of independent and group play were related to materials and location. (DR)

UR - <http://search.proquest.com/docview/64341700?accountid=14701>

ER -

TY - JOUR

ID - 2079

T1 - Teaching Object Permanence: An Action Research Study

A1 - Bruce,Susan M.

A1 - Vargas,Claudia

Y1 - 2013///

KW - ERIC

KW - Unsupervised Play Addition

KW - ERIC,Current Index to Journals in Education (CIJE)

KW - visual impairments

KW - Action Research

KW - Disabilities

KW - Direct Instruction

KW - Human Body

KW - Multiple Disabilities

KW - Cues

KW - CHILDREN

KW - Object Permanence

RP - NOT IN FILE

SP - 60

EP - 64

JF - Journal of Visual Impairment & Blindness

VL - 107

IS - 1

PB - American Foundation for the Blind. 11 Penn Plaza Suite 300, New York, NY 10001.

N2 - "Object permanence," also known as "object concept" in the field of visual impairment, is one of the most important early developmental milestones. The achievement of object permanence is associated with the onset of representational thought and language. Object permanence is important to orientation, including the recognition of landmarks. Independent mobility (such as crawling) improves visual attentiveness, which is critical to the achievement of later object permanence tasks. Direct instruction can accelerate the mastery of object permanence in children with disabilities and is more effective than general stimulation programs. This article presents an action research study on teaching object permanence to a child with multiple disabilities and visual impairment. It illustrates some of the principles of assessment and instruction described in Bruce and Vargas (2012). The Institutional Review Board at Boston College approved this study, which was part of a set of action research studies on pivotal milestones that were conducted with children with multiple disabilities. (Contains 2 figures.)

SN - 0145-482X, 0145-482X

UR - <http://search.proquest.com/docview/1413413998?accountid=14701>

L2 - [http://sfx.scholarsportal.info/ottawa?url\\_ver=Z39.88-](http://sfx.scholarsportal.info/ottawa?url_ver=Z39.88-)

2004&rft\_val\_fmt=info:ofi/fmt:kev:mtx:journal&genre=article&sid=ProQ:ProQ%3Aericshell&atitle=Teaching+Object+Permanence%3A+An+Action+Research+Study&title=Journal+of+Visual+Impairment+%26+Blindness&issn=0145482X&date=2013-01-

01&volume=107&issue=1&spage=60&au=Bruce%2C+Susan+M.%3BVargas%2C+Claudia&isbn=&jtitle=Journal+of+Visual+Impairment+%26+Blindness&bttitle=&rft\_id=info:eric/EJ1008202

ER -

TY - JOUR

ID - 2080

T1 - Disorganized Attachment and Inhibitory Capacity: Predicting Externalizing Problem Behaviors

A1 - Bohlin,Gunilla

A1 - Eninger,Lilianne

A1 - Brocki,Karin Cecilia

A1 - Thorell,Lisa B.

Y1 - 2012/04//

KW - ERIC

KW - Unsupervised Play Addition

KW - ERIC,Current Index to Journals in Education (CIJE)

KW - Attention Deficit Hyperactivity Disorder

KW - Play

KW - Young Children

KW - Pervasive Developmental Disorders

KW - Longitudinal Studies

KW - Inhibition

KW - Behavior Problems

KW - Emotional Development

KW - Symptoms (Individual Disorders)

KW - Toys

KW - Autism

KW - Attachment Behavior

RP - NOT IN FILE

SP - 449

EP - 458

JF - Journal of Abnormal Child Psychology

JA - J Abnorm.Child Psychol.

VL - 40

IS - 3

PB - Springer. 233 Spring Street, New York, NY 10013.

N2 - The aim of the present study was to investigate whether attachment insecurity, focusing on disorganized attachment, and the executive function (EF) component of inhibition, assessed at age 5, were longitudinally related to general externalizing problem behaviors as well as to specific symptoms of ADHD and Autism spectrum disorder (ASD), and callous-unemotional (CU) traits. General externalizing problem behaviors were also measured at age 5 to allow for a developmental analysis. Outcome variables were rated by parents and teachers. The sample consisted of 65 children with an oversampling of children with high levels of externalizing behaviors. Attachment was evaluated using a story stem attachment doll play procedure. Inhibition was measured using four different tasks. The results showed that both disorganized attachment and poor inhibition were longitudinally related to all outcome variables. Controlling for initial level of externalizing problem behavior, poor inhibition predicted ADHD symptoms and externalizing problem behaviors, independent of disorganized attachment, whereas for ASD symptoms no predictive relations remained. Disorganized attachment independently predicted CU traits

SN - 0091-0627, 0091-0627

UR - <http://search.proquest.com/docview/968107987?accountid=14701>

L2 - [http://sfx.scholarsportal.info/ottawa?url\\_ver=Z39.88-](http://sfx.scholarsportal.info/ottawa?url_ver=Z39.88-)

2004&rft\_val\_fmt=info:ofi/fmt:kev:mtx:journal&genre=article&sid=ProQ:ProQ%3Aericshell&atitle=Disorganized+Attachment+and+Inhibitory+Capacity%3A+Predicting+Externalizing+Problem+Behaviors&title=Journal+of+Abnormal+Child+Psychology&issn=00910627&date=2012-04-

01&volume=40&issue=3&spage=449&au=Bohlin%2C+Gunilla%3BEninger%2C+Lilianne%3BBrocki%2C+Karin+Cecilia%3BThorell%2C+Lisa+B.&isbn=&jtitle=Journal+of+Abnormal+Child+Psychology&bttitle=&rft\_id=info:eric/EJ957952

ER -

TY - JOUR

ID - 2081

T1 - The Effects of Prompts and a Group-Oriented Contingency on Out-of-School Physical Activity in Elementary School-Aged Students

A1 - Hastie,Peter A.

A1 - van der Mars,Hans

A1 - Layne,Todd

A1 - Wadsworth,Danielle

Y1 - 2012/04//

KW - ERIC

KW - Unsupervised Play Addition

KW - Alabama

KW - ERIC,Current Index to Journals in Education (CIJE)

KW - Elementary Education

KW - Grade 4

KW - Educational Strategies

KW - Instructional Effectiveness

KW - Equipment

KW - Play

KW - Rural Areas

KW - Physical Activities

KW - Physical Education

KW - Behavior Modification  
KW - Reinforcement  
KW - Teaching Methods  
KW - Physical Activity Level  
RP - NOT IN FILE  
SP - 131  
EP - 145  
JF - Journal of Teaching in Physical Education  
VL - 31  
IS - 2  
PB - Human Kinetics, 1607 North Market Street, Champaign, IL 61820.  
N2 - This study examined the effectiveness of three conditions in which 48 fourth-grade students were prompted to be physically active out of school. Using an alternating treatments design (Cooper, Heron, & Heward, 2007) the three intervention conditions included: (a) Baseline: No prompting of students, (b) Teacher Prompts: Verbal prompt to "remember to do something active after school today", and (c) Teacher Prompts and group-oriented contingencies: Verbal prompts with an index card where students could record their activity to earn bonus points as part of a team challenge. Graphically plotted pedometer data depicting data paths, variability, and trends within and across three conditions showed that students were more active outside of school only when the contingent reinforcement (c) was in place. This suggests that using prompts and group-oriented contingencies within Sport Education appears to be an effective and authentic context for promoting independent (i.e., free play) out-of-school time physical activity. (Contains 2 tables and 1 figure.)  
SN - 0273-5024, 0273-5024  
UR - <http://search.proquest.com/docview/1140128052?accountid=14701>  
L2 - [http://sfx.scholarsportal.info/ottawa?url\\_ver=Z39.88-2004&rft\\_val\\_fmt=info:ofi/fmt:kev:mtx:journal&genre=article&sid=ProQ:ProQ%3Aericshell&atitle=The+Effects+of+Prompts+and+a+Group-Oriented+Contingency+on+Out-of-School+Physical+Activity+in+Elementary+School-Aged+Students&title=Journal+of+Teaching+in+Physical+Education&issn=02735024&date=2012-04-01&volume=31&issue=2&page=131&au=Hastie%2C+Peter+A.%3Bvan+der+Mars%2C+Hans%3BLayne%2C+Todd%3BWadsworth%2C+Danielle&isbn=&jtitle=Journal+of+Teaching+in+Physical+Education&bttitle=&rft\\_id=info:eric/EJ978086](http://sfx.scholarsportal.info/ottawa?url_ver=Z39.88-2004&rft_val_fmt=info:ofi/fmt:kev:mtx:journal&genre=article&sid=ProQ:ProQ%3Aericshell&atitle=The+Effects+of+Prompts+and+a+Group-Oriented+Contingency+on+Out-of-School+Physical+Activity+in+Elementary+School-Aged+Students&title=Journal+of+Teaching+in+Physical+Education&issn=02735024&date=2012-04-01&volume=31&issue=2&page=131&au=Hastie%2C+Peter+A.%3Bvan+der+Mars%2C+Hans%3BLayne%2C+Todd%3BWadsworth%2C+Danielle&isbn=&jtitle=Journal+of+Teaching+in+Physical+Education&bttitle=&rft_id=info:eric/EJ978086)  
ER -  
  
TY - JOUR  
ID - 2082  
T1 - Young Children's Explorations: Young Children's Research?  
A1 - Murray,Jane  
Y1 - 2012///  
KW - ERIC  
KW - Unsupervised Play Addition  
KW - England  
KW - ERIC,Current Index to Journals in Education (CIJE)  
KW - Early Childhood Education  
KW - Teacher Role  
KW - Play  
KW - Young Children  
KW - Ethnography  
KW - Child Care  
KW - Epistemology  
KW - Educational Environment  
KW - Time  
KW - Foreign Countries  
KW - Discovery Processes  
KW - Naturalistic Observation  
RP - NOT IN FILE  
SP - 1209

EP - 1225

JF - Early Child Development and Care

VL - 182

IS - 9

PB - Routledge, , 325 Chestnut Street Suite 800, Philadelphia, PA 19106.

N2 - "Exploration" is recognised as research behaviour; anecdotally, as an early years' teacher, I witnessed many young children exploring. However, young children's self-initiated explorations are rarely regarded as research by adult researchers and policy-makers. The exclusion of young children's autonomous explorations from recognition as research conflicts with "new sociology" perspectives positioning children as social actors. These tensions have driven a small-scale interpretive study, developed with children aged four to eight years in three "good" schools in England to investigate (1) Do children aged four to eight years in three Early Childhood Education and Care settings explore?; (2) If so, what are their explorations and what effects and affects them?; and (3) Do young children's explorations count as epistemology? Findings indicate that in settings where "free-flow" play characterised practice, four- to five-year-old children engaged in exploration, but its quality was affected by several factors, including variable levels of children's autonomy. Seven- to eight-year-old children in a teacher-directed setting explored less than the four- to five-year-old children, but were frequently observed "off-task", pursuing self-initiated explorations. (Contains 2 tables and 2 figures.)

SN - 0300-4430, 0300-4430

UR - <http://search.proquest.com/docview/1322247108?accountid=14701>

L2 - [http://sfx.scholarsportal.info/ottawa?url\\_ver=Z39.88-](http://sfx.scholarsportal.info/ottawa?url_ver=Z39.88-)

2004&rft\_val\_fmt=info:ofi/fmt:kev:mtx:journal&genre=article&sid=ProQ:ProQ%3Aericshell&atitle=Young+Children%27s+Explorations%3A+Young+Children%27s+Research%3F&title=Early+Child+Development+and+Care&issn=03004430&date=2012-01-

01&volume=182&issue=9&spage=1209&au=Murray%2C+Jane&isbn=&jtitle=Early+Child+Development+and+Care&bttitle=&rft\_id=info:eric/EJ993789

ER -

TY - JOUR

ID - 2083

T1 - Influence of Previous Knowledge, Language Skills and Domain-Specific Interest on Observation Competency

A1 - Kohlhauf, Lucia

A1 - Rutke, Ulrike

A1 - Neuhaus, Birgit

Y1 - 2011/10//

KW - ERIC

KW - Unsupervised Play Addition

KW - ERIC, Current Index to Journals in Education (CIJE)

KW - Elementary Secondary Education

KW - Play

KW - Competence

KW - Language Skills

KW - Research Methodology

KW - Higher Education

KW - Observation

KW - CHILDREN

KW - English (Second Language)

KW - Biological Sciences

KW - Scientific Methodology

KW - Sciences

KW - Age Differences

RP - NOT IN FILE

SP - 667

EP - 678

JF - Journal of Science Education and Technology

VL - 20

IS - 5

PB - Springer. 233 Spring Street, New York, NY 10013.

N2 - Many epoch-making biological discoveries (e.g. Darwinian Theory) were based upon observations. Nevertheless, observation is often regarded as "just looking" rather than a basic scientific skill. As observation is one of the main research methods in biological sciences, it must be considered as an independent research method and systematic practice of this method is necessary. Because observation skills form the basis of further scientific methods (e.g. experiments or comparisons) and children from the age of 4 years are able to independently generate questions and hypotheses, it seems possible to foster observation competency at a preschool level. To be able to provide development-adequate individual fostering of this competency, it is first necessary to assess each child's competency. Therefore, drawing on the recent literature, we developed in this study a competency model that was empirically evaluated within learners (N = 110) from different age groups, from kindergarten to university. In addition, we collected data on language skills, domain-specific interest and previous knowledge to analyse coherence between these skills and observation competency. The study showed as expected that previous knowledge had a high impact on observation competency, whereas the influence of domain-specific interest was nonexistent. Language skills were shown to have a weak influence. By utilising the empirically validated model consisting of three dimensions ("Describing", "Scientific reasoning" and "Interpreting") and three skill levels, it was possible to assess each child's competency level and to develop and evaluate guided play activities to individually foster a child's observation competency

SN - 1059-0145, 1059-0145

UR - <http://search.proquest.com/docview/964172571?accountid=14701>L2 - [http://sfx.scholarsportal.info/ottawa?url\\_ver=Z39.88-](http://sfx.scholarsportal.info/ottawa?url_ver=Z39.88-)

2004&rft\_val\_fmt=info:ofi/fmt:kev:mtx:journal&genre=article&sid=ProQ:ProQ%3Aericshell&atitle=Influence+of+Previous+Knowledge%2C+Language+Skills+and+Domain-Specific+Interest+on+Observation+Competency&title=Journal+of+Science+Education+and+Technology&issn=10590145&date=2011-10-

01&volume=20&issue=5&spage=667&au=Kohlhauf%2C+Lucia%3BRutke%2C+Ulrike%3BNeuhaus%2C+Birgit&isbn=&jtitle=Journal+of+Science+Education+and+Technology&bttitle=&rft\_id=info:eric/EJ941467

ER -

TY - RPRT

ID - 2084

T1 - Evaluation of Breakthrough's "America 2049" Game

A1 - Diamond,James

A1 - Brunner,Cornelia

Y1 - 2011/10//

N1 - Last updated - 2013-07-02

KW - ERIC

KW - Unsupervised Play Addition

KW - Brazil

KW - Australia

KW - Canada

KW - Estonia

KW - France

KW - Germany

KW - India

KW - INDONESIA

KW - Pakistan

KW - Romania

KW - Singapore

KW - United Arab Emirates

KW - United Kingdom

KW - United States

KW - ERIC,Resources in Education (RIE)

KW - Cultural Pluralism

KW - Instructional Effectiveness

KW - Play



KW - World Views

KW - Moral Issues

KW - Critical Thinking

KW - Simulation

KW - Civil Rights

KW - Decision Making

KW - Foreign Countries

KW - Educational Games

KW - Ethnic Diversity

KW - Social Justice

KW - Civics

KW - United States History

KW - Selection

KW - Futures (of Society)

RP - NOT IN FILE

SP - 50

PB - Education Development Center, 55 Chapel Street, Newton, MA 02458-1060.

N2 - Breakthrough, a global human rights organization, produced "America 2049," an alternate-reality game set in a dystopian future in which the United States is on the verge of breaking apart because of an inability to tolerate diversity and promote human rights. During the 12-week game launch, players uncovered artifacts related to the persistent struggle for human rights in American history, while also watching an unfolding narrative about oppression and the loss of human rights in the future. Players could decide whether to support the activities of "Divided We Fall," a group dedicated to preserving national unity, or the "Council on American Heritage," an organization pushing for dissolution. By using a narrative-driven, episodic game (the narrative was released in weekly installments during the 12-week launch), Breakthrough engaged game players on human rights issues and instances of social injustice in a different way. Rather than simply telegraphing positions on issues, game play in "America 2049" permits some level of individual agency by enabling players to decide whether and how to align their in-game personas with opposing factions in the context of an unfolding drama. Based on personal or game-related goals, players can choose to support either side (pro- or anti-human rights) in the conflict without affecting their score. The goal was not to promote "good" or pro-human rights behavior during game play, but rather to encourage players to play with possibilities within a human rights-focused narrative and consider how societal choices about human rights could influence the future. To investigate the game's effectiveness as a tool to mobilize real-world action around the issues confronted in the game, Breakthrough engaged the Education Development Center, Inc. (EDC) as an independent evaluator to evaluate the game. Two research questions framed the evaluation: (1) Do players indicate a willingness to reconsider issues or become active around them following game play? (And when they do indicate willingness, which aspects of the game do they say are influential?); and (2) Is there a relationship between the categories of "moral reasoning" players use in the game and their willingness to reconsider issues? Findings include: (1) 93% (97/104) of survey respondents described their political leanings toward the issues in the game as either "Very liberal," "Liberal," or "Moderate"; (2) 89% (48/54 comments) of the post-game survey comments about the game were positive; (3) 86% (89/104) of players who completed the follow-up survey indicated at least some willingness to become active at some point in the future on an issue they encountered in the game; (4) 58% (60/104) of respondents reported that they played serious games "Never" or "A few times a year"; (5) 47% (49/104) of the survey respondents cited one of two game features as most influential in prompting them to reconsider the issues: the game's overarching narrative and the specific experiences of the non-player characters; and (6) There is no discernible relationship between the specific choices a player makes during game play and her or his willingness to consider becoming active on issues (as indicated on the survey), nor is there a relationship between choices and a player's reported "play style". To continue to capitalize on players' positive experiences during the game launch, Breakthrough may wish to consider the following recommendations for future game development: (1) Consider introducing other game elements that might bring more players "into the fold" earlier; (2) Consider following up with players who did not persist; (3) Structure dialogues about human rights; and (4) Allow players to experience the consequences of game play choices. Appended are: (1) Choice-point rationales; (2) Follow-up survey text (originally online at [surveyMonkey.com](http://surveyMonkey.com)); (3) List of levels and themes/issues addressed in the game narrative; and (4) Main characters, groups, and plot points in "America 2049". (Contains 7 figures and 4 tables.)

UR - <http://search.proquest.com/docview/1373088506?accountid=14701>

L2 - [http://sfx.scholarsportal.info/ottawa?url\\_ver=Z39.88-2004&rft\\_val\\_fmt=info:ofi/fmt:kev:mtx:book&genre=unknown&sid=ProQ:ERIC&atitle=&title=Evaluation+of+Breakthrough%27s+%22America+2049%22+Game&issn=&date=2011-10-01&volume=&issue=&spage=50&au=Diamond%2C+James%3BBrunner%2C+Cornelia&isbn=&jtitle=&btitle=Evaluation+of+Breakthrough%27s+%22America+2049%22+Game&rft\\_id=info:eric/ED543350](http://sfx.scholarsportal.info/ottawa?url_ver=Z39.88-2004&rft_val_fmt=info:ofi/fmt:kev:mtx:book&genre=unknown&sid=ProQ:ERIC&atitle=&title=Evaluation+of+Breakthrough%27s+%22America+2049%22+Game&issn=&date=2011-10-01&volume=&issue=&spage=50&au=Diamond%2C+James%3BBrunner%2C+Cornelia&isbn=&jtitle=&btitle=Evaluation+of+Breakthrough%27s+%22America+2049%22+Game&rft_id=info:eric/ED543350)  
ER -

TY - JOUR

ID - 2085

T1 - "Games Are Made for Fun": Lessons on the Effects of Concept Maps in the Classroom Use of Computer Games

A1 - Charsky,Dennis

A1 - Ressler,William

Y1 - 2011/04//

KW - ERIC

KW - Unsupervised Play Addition

KW - ERIC,Current Index to Journals in Education (CIJE)

KW - Grade 9

KW - Educational Strategies

KW - Instructional Effectiveness

KW - Video Games

KW - Computer Simulation

KW - Class Activities

KW - Play

KW - Instructional Materials

KW - Scaffolding (Teaching Technique)

KW - Control Groups

KW - Educational Games

KW - Concept Mapping

KW - Learning Motivation

KW - Concept Teaching

KW - Student Motivation

RP - NOT IN FILE

SP - 604

EP - 615

JF - Computers & Education

VL - 56

IS - 3

PB - Elsevier. 6277 Sea Harbor Drive, Orlando, FL 32887-4800.

N2 - Does using a computer game improve students' motivation to learn classroom material? The current study examined students' motivation to learn history concepts while playing a commercial, off-the-shelf computer game, Civilization III. The study examined the effect of using conceptual scaffolds to accompany game play. Students from three ninth-grade classrooms were assigned to one of three groups: one group used an expert generated concept map, one group constructed their own concept maps, and a control group used no map. It was predicted that the use of concept maps would enhance the educational value of the game playing activity, in particular students' motivational levels; however, the opposite happened. Students who used a concept map showed lower motivation on the task relative to their baseline motivation for regular classroom instruction. In contrast, the levels of motivation in playing the game, for students in the control group, met or exceeded their levels of motivation during regular classroom instruction. These results suggest that using a conceptual scaffold can decrease students' motivation to learn classroom material through game play, perhaps because conceptual maps can (a) focus students' attention on the difficulty of learning the concepts and on the extrinsic rewards for playing the game and (b) make game play less autonomous, less creative, and less active. All of these can negate the primary property that provides playing its principal potential pedagogical power: fun. (Contains 4 tables and 8 figures.)

SN - 0360-1315, 0360-1315

UR - <http://search.proquest.com/docview/851228990?accountid=14701>

L2 - [http://sfx.scholarsportal.info/ottawa?url\\_ver=Z39.88-2004&rft\\_val\\_fmt=info:ofi/fmt:kev:mtx:journal&genre=article&sid=ProQ:ProQ%3Aericshell&atitle=%22Games+Are+Made+for+Fun%22%3A+Lessons+on+the+Effects+of+Concept+Maps+in+the+Classroom+Use+of+Computer+Games&title=Computers+%26+Education&issn=03601315&date=2011-04-01&volume=56&issue=3&spage=604&au=Charsky%2C+Dennis%3BRessler%2C+William&isbn=&jtitle=Computers+%26+Education&bttitle=&rft\\_id=info:eric/EJ908621](http://sfx.scholarsportal.info/ottawa?url_ver=Z39.88-2004&rft_val_fmt=info:ofi/fmt:kev:mtx:journal&genre=article&sid=ProQ:ProQ%3Aericshell&atitle=%22Games+Are+Made+for+Fun%22%3A+Lessons+on+the+Effects+of+Concept+Maps+in+the+Classroom+Use+of+Computer+Games&title=Computers+%26+Education&issn=03601315&date=2011-04-01&volume=56&issue=3&spage=604&au=Charsky%2C+Dennis%3BRessler%2C+William&isbn=&jtitle=Computers+%26+Education&bttitle=&rft_id=info:eric/EJ908621)  
 ER -

TY - JOUR

ID - 2086

T1 - The Fun Culture in Seniors' Online Communities

A1 - Nimrod, Galit

Y1 - 2011/04//

KW - ERIC

KW - Unsupervised Play Addition

KW - ERIC, Current Index to Journals in Education (CIJE)

KW - Play

KW - Well Being

KW - Gender Differences

KW - Leisure Time

KW - Social Behavior

KW - Ethnography

KW - Aging (Individuals)

KW - Computer Mediated Communication

KW - Older Adults

KW - Participation

KW - Games

KW - Coping

KW - Interpersonal Relationship

KW - Internet

RP - NOT IN FILE

SP - 226

EP - 237

JF - Gerontologist

VL - 51

IS - 2

PB - Oxford University Press. Great Clarendon Street, Oxford, OX2 6DP, UK. Tel: +44-1865-353907; Fax: +44-1865-353485; e-mail: [jnls.cust.serv@oxfordjournals.org](mailto:jnls.cust.serv@oxfordjournals.org); Web site: <http://gerontologist.oxfordjournals.org>

N2 - Purpose of the study: Previous research found that "fun on line" is the most dominant content in seniors' online communities. The present study aimed to further explore the "fun culture" in these communities and to discover its unique qualities. Design and Methods: The study applied an online ethnography (netnography) approach, utilizing a full year's data from 6 leading seniors' online communities. The final database included about 50,000 posts. Results: The majority of posts were part of online social games, including cognitive, associative, and creative games. The main subjects in all contents were sex, gender differences, aging, grandparenting, politics, faith, and alcohol. Main participatory behaviors were selective timing, using expressive style, and personalization of the online character. Although most participants were "lurkers," the active participants nurtured community norms and relationships, as reflected in the written dialogues. Implications: In a reality of limited alternatives for digital games that meet older adults' needs and interests, seniors found an independent system to satisfy their need for play. Seniors' online communities provided a unique form of casual leisure, whose nature varied among different groups of participants. The fun culture seemed to offer participants many desired benefits, including meaningful play, liminality and communitas, opportunity to practice and demonstrate their abilities, and means for coping with aging. Therefore, it may have positive impact on seniors' well-being and successful aging

SN - 0016-9013, 0016-9013

UR - <http://search.proquest.com/docview/864938974?accountid=14701>

L2 - [http://sfx.scholarsportal.info/ottawa?url\\_ver=Z39.88-2004&rft\\_val\\_fmt=info:ofi/fmt:kev:mtx:journal&genre=article&sid=ProQ:ProQ%3Aericshell&atitle=The+Fun+Culture+in+Seniors%27+Online+Communities&title=Gerontologist&issn=00169013&date=2011-04-01&volume=51&issue=2&spage=226&au=Nimrod%2C+Galit&isbn=&jtitle=Gerontologist&bttitle=&rft\\_id=info:eric/EJ918785](http://sfx.scholarsportal.info/ottawa?url_ver=Z39.88-2004&rft_val_fmt=info:ofi/fmt:kev:mtx:journal&genre=article&sid=ProQ:ProQ%3Aericshell&atitle=The+Fun+Culture+in+Seniors%27+Online+Communities&title=Gerontologist&issn=00169013&date=2011-04-01&volume=51&issue=2&spage=226&au=Nimrod%2C+Galit&isbn=&jtitle=Gerontologist&bttitle=&rft_id=info:eric/EJ918785)

ER -

TY - JOUR

ID - 2087

T1 - Impaired Attention to the Eyes of Attachment Figures and the Developmental Origins of Psychopathy

A1 - Dadds,Mark R.

A1 - Jambrak,Jasmin

A1 - Pasalich,Dave

A1 - Hawes,David J.

A1 - Brennan,John

Y1 - 2011/03//

KW - ERIC

KW - Unsupervised Play Addition

KW - ERIC,Current Index to Journals in Education (CIJE)

KW - Play

KW - Fear

KW - MALES

KW - Mothers

KW - Correlation

KW - Fathers

KW - Behavior Problems

KW - Antisocial Behavior

KW - Sons

KW - Personality Traits

KW - Nonverbal Communication

KW - Recognition (Psychology)

KW - Parent Child Relationship

KW - Human Body

KW - Emotional Response

KW - Psychopathology

KW - Intervals

KW - Evidence

KW - Attachment Behavior

KW - Empathy

RP - NOT IN FILE

SP - 238

EP - 245

JF - Journal of Child Psychology and Psychiatry

VL - 52

IS - 3

PB - Wiley-Blackwell. 350 Main Street, Malden, MA 02148.

N2 - Background: A pervasive failure to attend and respond to emotionally salient stimuli is a core feature of psychopathy. We hypothesise that this begins early in life and is expressed most importantly as a failure to attend to core emotional features (viz., the eyes) of attachment figures. The current study tested whether impaired eye contact is a characteristic of children with antisocial behaviour and callous-unemotional (CU) traits in real life settings. Methods: Conduct problem males were assessed on levels of CU traits and observed in free play and "emotion talk" scenarios with their parents. Eye contact was measured for each dyad (child to mother, child to father, mother to child, father to child) as a proportion of intervals in which the child and parent interacted. Results: Levels of eye contact were reciprocated in mother-son and father-son dyads, but males with high CU traits showed consistent impairments in eye contact towards their parents. Mothers of high CU boys did not show impairments; however, fathers of high CU boys showed similar impairment. Levels of eye contact

were also associated with independent measures of fear recognition, and general empathy in the boys.

Conclusions: The findings provide the first evidence that impairments in eye contact, previously shown during computer tasks, characterise psychopathic traits in young males

SN - 0021-9630, 0021-9630

UR - <http://search.proquest.com/docview/881455373?accountid=14701>

L2 - [http://sfx.scholarsportal.info/ottawa?url\\_ver=Z39.88-](http://sfx.scholarsportal.info/ottawa?url_ver=Z39.88-)

2004&rft\_val\_fmt=info:ofi/fmt:kev:mtx:journal&genre=article&sid=ProQ:ProQ%3Aericshell&atitle=Impaired+Attention+to+the+Eyes+of+Attachment+Figures+and+the+Developmental+Origins+of+Psychopathy&title=Journal+of+Child+Psychology+and+Psychiatry&issn=00219630&date=2011-03-

01&volume=52&issue=3&spage=238&au=Dadds%2C+Mark+R.%3BJambrak%2C+Jasmin%3BPasalich%2C+Dave%3BHawes%2C+David+J.%3BBrennan%2C+John&isbn=&jtitle=Journal+of+Child+Psychology+and+Psychiatry&bttitle=&rft\_id=info:eric/EJ928626

ER -

TY - JOUR

ID - 2088

T1 - Structured Work Systems: Supporting Meaningful Engagement in Preschool Settings for Children with Autism Spectrum Disorders

A1 - Carnahan,Christina

A1 - Harte,Helene

A1 - Schumacher Dyke,Karin

A1 - Hume,Kara

A1 - Borders,Christy

Y1 - 2011/03//

KW - ERIC

KW - Unsupervised Play Addition

KW - ERIC,Current Index to Journals in Education (CIJE)

KW - Preschool Education

KW - Play

KW - Leisure Time

KW - Student Participation

KW - Pervasive Developmental Disorders

KW - Group Activities

KW - Job Skills

KW - Student Needs

KW - Visual Stimuli

KW - Hygiene

KW - Preschool Children

KW - Autism

KW - Time on Task

KW - Teaching Methods

RP - NOT IN FILE

SP - 2

EP - 16

JF - Young Exceptional Children

VL - 14

IS - 1

PB - SAGE Publications. 2455 Teller Road, Thousand Oaks, CA 91320.

N2 - Key characteristics of autism include differences in communication, social interaction, and restricted or repetitive activities and interests (American Psychiatric Association, 2000). Because of these differences, active engagement is challenging for many young children with autism spectrum disorders (ASD). However, such engagement in a variety of activities is crucial for promoting positive future outcomes (Iovannone, Dunlap, Huber, & Kincaid, 2003). This article suggests structured work systems (SWS) as one tool that may help promote engagement for children with ASD in inclusive preschool settings. SWS is a visually structured intervention used to organize a series of activities for individuals with autism (Hume & Odom, 2007; Mesibov, Shea, & Schopler, 2005). SWS addresses individual child needs and promotes participation in the classroom,

home, or community setting. SWS can be used to organize small-group activities, play and leisure activities, academic tasks, personal hygiene activities, household responsibilities, and vocational work jobs. SWS supports independent participation and activity completion and increases on-task behavior for young children with autism (Hume & Odom, 2007). (Contains 2 tables and 3 figures.)

SN - 1096-2506, 1096-2506

UR - <http://search.proquest.com/docview/864939825?accountid=14701>

L2 - [http://sfx.scholarsportal.info/ottawa?url\\_ver=Z39.88-](http://sfx.scholarsportal.info/ottawa?url_ver=Z39.88-)

2004&rft\_val\_fmt=info:ofi/fmt:kev:mtx:journal&genre=article&sid=ProQ:ProQ%3Aericshell&atitle=Structured+Work+Systems%3A+Supporting+Meaningful+Engagement+in+Preschool+Settings+for+Children+with+Autism+Spectrum+Disorders&title=Young+Exceptional+Children&issn=10962506&date=2011-03-01&volume=14&issue=1&page=2&au=Carnahan%2C+Christina%3BHarte%2C+Helene%3BSchumacher+Dyke%2C+Karin%3BHume%2C+Kara%3BBorders%2C+Christy&isbn=&jtitle=Young+Exceptional+Children&title=&rft\_id=info:eric/EJ917323

ER -

TY - JOUR

ID - 2089

T1 - When Is Creativity? Intrinsic Motivation and Autonomy in Children's Artmaking

A1 - Jaquith, Diane B.

Y1 - 2011/01//

KW - ERIC

KW - Unsupervised Play Addition

KW - ERIC, Current Index to Journals in Education (CIJE)

KW - Teachers

KW - Studio Art

KW - Play

KW - Motivation

KW - Incentives

KW - Creativity

KW - Personal Autonomy

KW - Childrens Art

RP - NOT IN FILE

SP - 14

EP - 19

JF - Art Education

VL - 64

IS - 1

PB - National Art Education Association. 1916 Association Drive, Reston, VA 20191.

N2 - The title of this article borrows loosely from the philosopher Nelson Goodman, whose classic essay "When is Art" addresses context and symbolic function. The discussion in this article concerns an entirely different matter: identifying moments when a learner's creativity is sparked in school art programs. The word "creativity" usually enters conversations with students, teachers, parents, and administrators as a generic term for children's overall artistic output. Now school systems are rapidly incorporating 21st-century skills into their curricula, including creativity skills. In order to implement these skills in classrooms, teachers need to know what is and what is not creative work. There is great joy in the surprises that emerge when learners direct their own artmaking. This is the gift found in teaching--to watch learners take control and become independent thinkers and doers. When is creativity "not" in school art programs? Creativity is not found in rote exercises and prescribed assignments. Creativity is compromised by external motivations that supply students with excessive information, reward closed systems, and place undue emphasis on grades and deadlines. Creativity can arise when students respond to visual culture around them, particularly when they can integrate meaningful connections with popular culture into their own work. Creativity abounds when a student thinks divergently, ponders, intuitively perceives, infers, plays, makes mistakes, and embraces ambiguity. Creativity in school art programs thrives when learners are intrinsically motivated and have full autonomy to problem find and solve, defer, revise, redirect, and work at their own pace. In this article, the author lists some strategies that can help encourage creativity during art class. (Contains 7 figures.)

SN - 0004-3125, 0004-3125

UR - <http://search.proquest.com/docview/898323559?accountid=14701>

L2 - [http://sfx.scholarsportal.info/ottawa?url\\_ver=Z39.88-](http://sfx.scholarsportal.info/ottawa?url_ver=Z39.88-)

2004&rft\_val\_fmt=info:ofi/fmt:kev:mtx:journal&genre=article&sid=ProQ:ProQ%3Aericshell&atitle=When+Is+Creativity%3F+Intrinsic+Motivation+and+Autonomy+in+Children%27s+Artemaking&title=Art+Education&issn=00043125&date=2011-01-

01&volume=64&issue=1&spage=14&au=Jaquith%2C+Diane+B.&isbn=&jtitle=Art+Education&bttitle=&rft\_id=info:eric/EJ935011

ER -

TY - JOUR

ID - 2090

T1 - Can Unpredicted Outcomes Be Intended? The Role of Outcome-Beliefs in Children's Judgments of Intention

A1 - Liao, Yu

A1 - Li, Hong

A1 - Deak, Gedeon O.

Y1 - 2011///

KW - ERIC

KW - Unsupervised Play Addition

KW - ERIC, Current Index to Journals in Education (CIJE)

KW - Experiments

KW - Play

KW - Young Children

KW - Intention

KW - Games

KW - Beliefs

KW - Bias

RP - NOT IN FILE

SP - 106

EP - 117

JF - Cognitive Development

VL - 26

IS - 2

PB - Elsevier. 6277 Sea Harbor Drive, Orlando, FL 32887-4800.

N2 - An adult-like concept of intention includes a deliberate action to achieve a goal and a belief that one's action (if successful) will cause the desired outcome. For example, good outcomes caused by accident or by chance are not believed to be caused intentionally. In two experiments, we asked whether children understand this connection between intentions and outcomes. Children played two games in which actions could produce unintended outcomes (i.e., causes were unplanned). Children sometimes received a desirable reward independent of intention. In Experiment 1, 4- and 5-year-olds mistakenly claimed they had intended the desirable outcome even when it was unexpected. Four-year-olds judged that they had not intended a deliberate action if it did not yield a rewarding outcome. Experiment 2 demonstrates that 6-year-olds seldom make these errors. The results suggest that 4- and 5-year-old children have not yet attained an adult-like concept of intention. Their inaccurate judgments regarding their intentions, given a rewarding yet unexpected outcome, can be explained by a positivity bias

SN - 0885-2014, 0885-2014

UR - <http://search.proquest.com/docview/870288748?accountid=14701>

L2 - [http://sfx.scholarsportal.info/ottawa?url\\_ver=Z39.88-](http://sfx.scholarsportal.info/ottawa?url_ver=Z39.88-)

2004&rft\_val\_fmt=info:ofi/fmt:kev:mtx:journal&genre=article&sid=ProQ:ProQ%3Aericshell&atitle=Can+Unpredicted+Outcomes+Be+Intended%3F+The+Role+of+Outcome-

Beliefs+in+Children%27s+Judgments+of+Intention&title=Cognitive+Development&issn=08852014&date=2011-01-

01&volume=26&issue=2&spage=106&au=Liao%2C+Yu%3B+Li%2C+Hong%3B+Deak%2C+Gedeon+O.&isbn=&jtitle=Cognitive+Development&bttitle=&rft\_id=info:eric/EJ923271

ER -

TY - JOUR

ID - 2091

T1 - Child-Child Interactions and Positive Social Focus among Preschool Children

A1 - Naerland, Terje

A1 - Martinsen, Harald

Y1 - 2011///

KW - ERIC

KW - Unsupervised Play Addition

KW - Norway

KW - ERIC, Current Index to Journals in Education (CIJE)

KW - Preschool Education

KW - Prediction

KW - Interaction

KW - Play

KW - Observation

KW - Correlation

KW - Peer Relationship

KW - Foreign Countries

KW - Video Technology

KW - Interpersonal Competence

KW - Preschool Children

KW - Social Status

KW - Age Differences

KW - Predictor Variables

RP - NOT IN FILE

SP - 361

EP - 370

JF - Early Child Development and Care

VL - 181

IS - 3

PB - Routledge, 325 Chestnut Street Suite 800, Philadelphia, PA 19106.

N2 - This study is based on video-recorded observations of 64 children during free play at their nursery. A measure of "social focus" in the preschool, regarded as an indicator of social status, was constructed from the amount of positive and neutral contacts children received from their peers. Only six children often received positive or neutral contacts from their peers. The majority of the children were relatively seldom focused on by the others. A total of 16 contact categories were observed which reflected the content, manner and social function of the contacts. Twelve of the contact categories were significantly correlated with social focus. A "contact score" was constructed based on the child-child contacts that were significantly correlated with social focus. The contact score predicted to a large extent social status assigned to the child by other children, sharing about 60% variance with social focus. Age did not have a significant independent contribution to the prediction of social focus, when the contact score and age were tested together in a variance analysis. This is indicative of a strong relationship between social behaviour and social status among preschool children. The relation between social focus, age and social behaviour is discussed. (Contains 4 tables.)

SN - 0300-4430, 0300-4430

UR - <http://search.proquest.com/docview/870284984?accountid=14701>

L2 - [http://sfx.scholarsportal.info/ottawa?url\\_ver=Z39.88-](http://sfx.scholarsportal.info/ottawa?url_ver=Z39.88-)

2004&rft\_val\_fmt=info:ofi/fmt:kev:mtx:journal&genre=article&sid=ProQ:ProQ%3Aericshell&atitle=Child-Child+Interactions+and+Positive+Social+Focus+among+Preschool+Children&title=Early+Child+Development+and+Care&issn=03004430&date=2011-01-

01&volume=181&issue=3&spage=361&au=Naerland%2C+Terje%3BMartinsen%2C+Harald&isbn=&jtitle=Early+Child+Development+and+Care&bttitle=&rft\_id=info:eric/EJ922716

ER -

TY - JOUR

ID - 2092

T1 - Language Competence and Social Focus among Preschool Children



A1 - Naerland, Terje

Y1 - 2011///

KW - ERIC

KW - Unsupervised Play Addition

KW - ERIC, Current Index to Journals in Education (CIJE)

KW - Kindergarten

KW - Preschool Education

KW - Measures (Individuals)

KW - Language Acquisition

KW - Play

KW - Language Skills

KW - Scores

KW - Pragmatics

KW - Peer Relationship

KW - Video Technology

KW - Preschool Children

KW - Social Status

KW - Age Differences

RP - NOT IN FILE

SP - 599

EP - 612

JF - Early Child Development and Care

VL - 181

IS - 5

PB - Routledge, . 325 Chestnut Street Suite 800, Philadelphia, PA 19106.

N2 - This study explores how various aspects of language competence are related to social focus among preschoolers. The study presented is based on video-recorded observation of 64 children, aged 11-61 months, during free play at their kindergarten. A measure of social focus in the preschool, regarded as an indicator of social status, was constructed based on the amount of positive and neutral contacts children received from their peers. The majority of the children were relatively seldom focused on by the others. From the transcription of the utterances, three measures of language competence were derived: a score to reflect the child's pragmatic skills, a score to reflect the range of categories the children have available in their characterisations of the world, and a score of mean length of utterance. All measures of language competence predicted social status when in combination with age. However, only the measure of pragmatic skills had an independent contribution to social focus when the variance of age was removed. When language competence is controlled for, age does not predict social status among preschool children. The relation between social focus in the kindergarten, age, and the three measures of language competence is discussed. (Contains 6 tables and 3 figures.)

SN - 0300-4430, 0300-4430

UR - <http://search.proquest.com/docview/870283964?accountid=14701>

L2 - [http://sfx.scholarsportal.info/ottawa?url\\_ver=Z39.88-](http://sfx.scholarsportal.info/ottawa?url_ver=Z39.88-)

2004&rft\_val\_fmt=info:ofi/fmt:kev:mtx:journal&genre=article&sid=ProQ:ProQ%3Aericshell&atitle=Language+Competence+and+Social+Focus+among+Preschool+Children&title=Early+Child+Development+and+Care&issn=03004430&date=2011-01-

01&volume=181&issue=5&spage=599&au=Naerland%2C+Terje&isbn=&jtitle=Early+Child+Development+and+Care&bttitle=&rft\_id=info:eric/EJ924044

ER -

TY - JOUR

ID - 2093

T1 - Character Toys as Psychological Tools

A1 - Smirnova, Elena O.

Y1 - 2011///

KW - ERIC

KW - Unsupervised Play Addition

KW - Russia (Moscow)

KW - ERIC, Current Index to Journals in Education (CIJE)

KW - Early Childhood Education

KW - Preschool Education

KW - Play

KW - Young Children

KW - psychology

KW - Personality

KW - Mental Health

KW - Criteria

KW - Child Safety

KW - Evaluation Methods

KW - Imagination

KW - Foreign Countries

KW - Self Concept

KW - Ethics

KW - Developmental Stages

KW - Child Development

KW - Role

KW - Toys

RP - NOT IN FILE

SP - 35

EP - 43

JA - International Journal of Early Years Education

VL - 19

IS - 1

PB - Routledge, 325 Chestnut Street Suite 800, Philadelphia, PA 19106.

N2 - The main characteristic of children's play is its mental aspect--the fact that it is based on thoughts and feelings and not on objective reality. During imaginary play, children go beyond the limits of reality, and toys are tools that help them to do this. Children need character toys--toys that play the role of companion or partner--in the early stages of development of play. Young children (under seven years) are not yet able to establish distance from their playthings and hence identify with dolls and absorb their characteristics. For young children, dolls and soft toys become an "alternative self", and in order to be a "good" psychological tool, they should be open to a child's inner world. "Interactive" toys are quite different from this in that they have an independent life of their own. An observational study of 50 children aged 5 to 5 1/2 showed that although they were intensely interested in an interactive toy, their play was at the level of simple functional play, and that the toy evoked no imaginary involvement and no play storylines, even though the children were clearly capable of these higher levels of play. The Moscow Toy and Game Centre (at the Moscow City University of Psychology and Education) have developed methods for evaluating toys, and the key criteria for evaluation are given here. The first step of evaluation is an "ethical and aesthetic filter" that screens out toys that could be a psychological or pedagogical danger. After this, the central criterion is whether the toy will allow children to project their inner world into it. Other criteria include the balance of detailed and schematised imagery and the tendency of toys (such as interactive toys) to encourage simple manipulation over the development of rich storylines

SN - 0966-9760, 0966-9760

UR - <http://search.proquest.com/docview/889924867?accountid=14701>

L2 - [http://sfx.scholarsportal.info/ottawa?url\\_ver=Z39.88-](http://sfx.scholarsportal.info/ottawa?url_ver=Z39.88-)

2004&rft\_val\_fmt=info:ofi/fmt:kev:mtx:journal&genre=article&sid=ProQ:ProQ%3Aericshell&atitle=Character+Toys+as+Psychological+Tools&title=International+Journal+of+Early+Years+Education&issn=09669760&date=2011-01-

01&volume=19&issue=1&spage=35&au=Smirnova%2C+Elena+O.&isbn=&jtitle=International+Journal+of+Early+Years+Education&btitle=&rft\_id=info:eric/EJ933308

ER -

TY - JOUR

ID - 2094

T1 - Children's Leadership Strategies in Early Childhood

A1 - Mawson,Brent

Y1 - 2011///

- KW - ERIC  
 KW - Unsupervised Play Addition  
 KW - New Zealand  
 KW - ERIC,Current Index to Journals in Education (CIJE)  
 KW - Early Childhood Education  
 KW - Play  
 KW - Young Children  
 KW - Individual Characteristics  
 KW - Gender Differences  
 KW - Case Studies  
 KW - Student Participation  
 KW - Observation  
 KW - Group Dynamics  
 KW - Transcripts (Written Records)  
 KW - Leadership Styles  
 KW - Performance Factors  
 KW - Leadership  
 RP - NOT IN FILE  
 SP - 327  
 EP - 338  
 JF - Journal of Research in Childhood Education  
 VL - 25  
 IS - 4  
 PB - Routledge. , 325 Chestnut Street Suite 800, Philadelphia, PA 19106.  
 N2 - Young children's leadership is an undertheorized and underresearched topic. Much of the research literature involves paired children working on adult-set tasks that are aimed to provide data on specific aspects of children's collaborative work. This article describes and discusses an investigation into children's leadership styles within independent collaborative play episodes. The research project involved observing children's independent collaborative play in a daylong early childhood setting one morning a week for 5 months. It was an interpretivist study, and the researcher did not participate in any way in the children's play, which was documented using field notes and digital photographs. Although clear gender differences in leadership styles were evident, the predominant boy leader only used assertive strategies, whereas the predominant girl leaders used physical assertive strategies rather than relational strategies to exert their control. It is suggested that individual cultural experiences and contextual factors play a greater part in children's leadership in early childhood education than current gender-focused explanations would suggest. (Contains 2 tables.)  
 SN - 0256-8543, 0256-8543  
 UR - <http://search.proquest.com/docview/964187226?accountid=14701>  
 L2 - [http://sfx.scholarsportal.info/ottawa?url\\_ver=Z39.88-2004&rft\\_val\\_fmt=info:ofi/fmt:kev:mtx:journal&genre=article&sid=ProQ:ProQ%3Aericshell&atitle=Children%27s+Leadership+Strategies+in+Early+Childhood&title=Journal+of+Research+in+Childhood+Education&issn=02568543&date=2011-01-01&volume=25&issue=4&spage=327&au=Mawson%2C+Brent&isbn=&jtitle=Journal+of+Research+in+Childhood+Education&bttitle=&rft\\_id=info:eric/EJ948803](http://sfx.scholarsportal.info/ottawa?url_ver=Z39.88-2004&rft_val_fmt=info:ofi/fmt:kev:mtx:journal&genre=article&sid=ProQ:ProQ%3Aericshell&atitle=Children%27s+Leadership+Strategies+in+Early+Childhood&title=Journal+of+Research+in+Childhood+Education&issn=02568543&date=2011-01-01&volume=25&issue=4&spage=327&au=Mawson%2C+Brent&isbn=&jtitle=Journal+of+Research+in+Childhood+Education&bttitle=&rft_id=info:eric/EJ948803)  
 ER -
- TY - JOUR  
 ID - 2095  
 T1 - Learning to Drive a Wheelchair in Virtual Reality  
 A1 - Inman,Dean P.  
 A1 - Loge,Ken  
 A1 - Cram,Aaron  
 A1 - Peterson,Missy  
 Y1 - 2011///  
 KW - ERIC  
 KW - Unsupervised Play Addition  
 KW - ERIC,Current Index to Journals in Education (CIJE)

- KW - Program Effectiveness  
 KW - Computer Simulation  
 KW - Drills (Practice)  
 KW - CHILDREN  
 KW - Computer Uses in Education  
 KW - Skill Development  
 KW - Assistive Technology  
 KW - Memory  
 KW - Vignettes  
 KW - Severe Disabilities  
 KW - Visual Perception  
 KW - Physical Disabilities  
 RP - NOT IN FILE  
 SP - 21  
 EP - 34  
 JF - Journal of Special Education Technology  
 VL - 26  
 IS - 3  
 PB - Technology and Media Division of the Council for Exceptional Children. 2900 Crystal Drive Suite 1000, Arlington, VA 22202.  
 N2 - This research project studied the effect that a technology-based training program, WheelchairNet, could contribute to the education of children with physical disabilities by providing a chance to practice driving virtual motorized wheelchairs safely within a computer-generated world. Programmers created three virtual worlds for training. Scenarios 1 and 2 promoted independent exploration, discovery, cause and effect relationships, and visual memory (skills prerequisite to independent mobility that orthopedically impaired children often lack due to lack of experience. Scenario 3 provided a more structured environment to establish appropriate street-crossing skills on a crosswalk with a traffic light. The project evaluated the children's progress in actual reality. Results from a multivariate repeated measures design suggest all four skills improved as a function of training time. Examination of individual data suggests that children spent most of their time in the first or second worlds in the early stages but, as their skills improved, they began to spend proportionally more time in the third (more difficult) street-crossing program. All those who completed the study showed gains in driving skills as indexed in actual reality. This is significant and supports the contention that children with severe orthopedic disabilities can acquire important functional skills in virtual reality without taking the risks of learning to drive in the real world and the cost of obtaining an actual wheelchair while they learn. (Contains 1 table and 6 figures.)  
 SN - 0162-6434, 0162-6434  
 UR - <http://search.proquest.com/docview/1361846129?accountid=14701>  
 L2 - [http://sfx.scholarsportal.info/ottawa?url\\_ver=Z39.88-2004&rft\\_val\\_fmt=info:ofi/fmt:kev:mtx:journal&genre=article&sid=ProQ:ProQ%3Aericshell&atitle=Learning+to+Drive+a+Wheelchair+in+Virtual+Reality&title=Journal+of+Special+Education+Technology&issn=01626434&date=2011-01-01&volume=26&issue=3&page=21&au=Inman%2C+Dean+P.%3BLoge%2C+Ken%3BCram%2C+Aaron%3BPeterson%2C+Missy&isbn=&jtitle=Journal+of+Special+Education+Technology&bttitle=&rft\\_id=info:eric/EJ1001790](http://sfx.scholarsportal.info/ottawa?url_ver=Z39.88-2004&rft_val_fmt=info:ofi/fmt:kev:mtx:journal&genre=article&sid=ProQ:ProQ%3Aericshell&atitle=Learning+to+Drive+a+Wheelchair+in+Virtual+Reality&title=Journal+of+Special+Education+Technology&issn=01626434&date=2011-01-01&volume=26&issue=3&page=21&au=Inman%2C+Dean+P.%3BLoge%2C+Ken%3BCram%2C+Aaron%3BPeterson%2C+Missy&isbn=&jtitle=Journal+of+Special+Education+Technology&bttitle=&rft_id=info:eric/EJ1001790)  
 ER -  
 TY - THES  
 ID - 2096  
 T1 - Games as Artistic Medium: Interfacing Complexity Theory in Game-Based Art Pedagogy  
 A1 - Patton,Ryan Matthew  
 N1 - Last updated - 2012-12-14  
 SubjectsTermNotLitGenreText - 129 11129 2351 2515; 628 5330 4770 4918 5964 9804 9351; 9814; 7940 126; 11255 4270 126; 122 8836; 2035 4270 126; 3206 4270 126; 2041 10666; 10279 625 3150; 625 3150; 10423 4786 6582; 7234; 2340; 3363 10278 8016 4542; 6644 10278 8016 4542; 3268 10669; 2525; 5472 3629 6582  
 KW - ERIC  
 KW - Unsupervised Play Addition  
 KW - ERIC,Resources in Education (RIE)

KW - Elementary Education  
 KW - Elementary Secondary Education  
 KW - Middle Schools  
 KW - Elementary School Students  
 KW - Studio Art  
 KW - Video Games  
 KW - Play  
 KW - Course Descriptions  
 KW - Systems Approach  
 KW - Action Research  
 KW - Middle School Students  
 KW - Observation  
 KW - Computer Literacy  
 KW - Art Education  
 KW - Social Systems  
 KW - Educational Games  
 KW - Computer Games  
 KW - Art History  
 KW - Activity Units  
 KW - Interviews  
 KW - Curriculum Implementation  
 KW - Educational Technology  
 RP - NOT IN FILE  
 SP - 258

N2 - Having computer skills, let alone access to a personal computer, has become a necessary component of contemporary Western society and many parts of the world. Digital media literacy involves youth being able to view, participate in, and make creative works with technologies in personal and meaningful ways. Games, defined in this study as structured play, provided the foundation for many of the works from 20th century art movements, such as Dadaism, Surrealism, Situationism, and Fluxus. I argue that these artists used games as methods to explore and expose rules and systems in ways of understanding the world through art. I describe how these artworks embodied complexity thinking in their use of game making methods to expose social, political, economic, and environmental systems. The game-based art pedagogy derived from this art history, also draws from the features of game-like unit operations (Bogost, 2006), strategies and tactics (de Certeau, 1997), and infinite play (Carse, 1987) to foster a critical aesthetic. Complexity thinking (or complexity theory), represents a way for constructing meaning that involves the integration of multiple types of systems, including dynamic models, closed-looped systems, and the ability to transfer one model of a system to another situation or phenomenon. Emergent behavior is supported in the complex systems modeled in video games such as "SimCity" and "Civilization." Much of game-based art pedagogy research centers on students learning by playing games. Learning history or other factual data in the form of games has value, however using games in this way does not encapsulate games as an artistic medium for creative purposes, only as a means for teaching. That is, while students created video games in a variety of classroom environments over the last fifteen years, typically it was done to learn subjects like math, computer science, or to develop language skills. In my action research study, I began with the premise based on my prior teaching experience, that video game creation was an attainable goal by youth, and a valuable studio project in the art classroom to understand complexity in social systems, and learn an art history of games as artworks. I recruited youth (ages of 8-13) and taught them how to make games in four iterations of a game creation course. The make-up of the courses comprised one class of middle school girls, two classes of elementary school children, and one class of middle school boys and girls. Each class met during a five-day course, learning concepts and methods of game development by playing and making physical, board, and video games. New curricular elements for the research included a physical game activity, a mobile game using 2-D barcodes, a tabletop game connecting the video game instruction, and game cards written as independent programmable unit operations. Students made video games that used the concepts of move, avoid, release, and contact (MARC) as a method I designed for exploring complexity thinking. I observed and recorded the participants' game making process; collected their games, journals, and pre and post surveys; and from these observations and feedback, I reviewed and revised the curriculum for each class. I interviewed the other course instructors who used the curriculum that I developed providing additional insight to the pedagogy, delivery of the curriculum, and student learning. Three months after the courses ended, a sample

set of students and parents took part in follow-up interviews regarding the impact of the course. Because games, specifically digital games (also called video games), are seen as potentially corrupting to children, I gathered parental input on their child's involvement. At the center of this study's curriculum, playful, game-like methods were used to create game-based artworks. Students critiqued games using detailed, expressive language to describe how games work, critically aware of how commercial games differ in complexity. From their game making experiences, students gained confidence and knowledge finding game structures in everyday life and how to make programmable media like video games. This study argues that learning through game-based art pedagogy, students begin to understand complexity thinking by producing digital media as a form of artistic expression, and as a form of preparation for future learning in and beyond a 4-12th grade art curriculum. [The dissertation citations contained here are published with the permission of ProQuest LLC. Further reproduction is prohibited without permission. Copies of dissertations may be obtained by Telephone (800) 1-800-521-0600. Web page: <http://www.proquest.com/en-US/products/dissertations/individuals.shtml>.]

SN - 9781124980409

UR - <http://search.proquest.com/docview/1140130376?accountid=14701>

L2 - [http://sfx.scholarsportal.info/ottawa?url\\_ver=Z39.88-](http://sfx.scholarsportal.info/ottawa?url_ver=Z39.88-)

2004&rft\_val\_fmt=info:ofi/fmt:kev:mtx:dissertation&genre=unknown&sid=ProQ:ERIC&atitle=&title=Games+as+Artistic+Medium%3A+Interfacing+Complexity+Theory+in+Game-

Based+Art+Pedagogy&issn=&date=2011-01-

01&volume=&issue=&spage=&au=Patton%2C+Ryan+Matthew&isbn=9781124980409&jtitle=&bttitle=&rft\_id=info:eric/ED534484

ER -

TY - JOUR

ID - 2098

T1 - Early Social Experience and Individual Differences in Infants' Joint Attention

A1 - Gaffan,Elizabeth A.

A1 - Martins,Carla

A1 - Healy,Sarah

A1 - Murray,Lynne

Y1 - 2010/05//

KW - ERIC

KW - Unsupervised Play Addition

KW - ERIC,Current Index to Journals in Education (CIJE)

KW - Cognitive Development

KW - Play

KW - Depression (Psychology)

KW - Socioeconomic Status

KW - Mothers

KW - Social Experience

KW - Mental Health

KW - Individual Differences

KW - Parent Child Relationship

KW - Researchers

KW - Toys

KW - Neurology

KW - Infants

RP - NOT IN FILE

SP - 369

EP - 393

JF - Social Development

VL - 19

IS - 2

PB - Wiley-Blackwell. 350 Main Street, Malden, MA 02148.

N2 - Fifty-nine healthy infants were filmed with their mothers and with a researcher at two, four, six and nine months in face-to-face play, and in toy-play at six and nine months. During toy-play at both ages, two indices of joint attention (JA)--infant bids for attention, and percent of time in shared attention--were assessed, along with

other behavioural measures. Global ratings were made at all four ages of infants' and mothers' interactive style. The mothers varied in psychiatric history (e.g., half had experienced postpartum depression) and socioeconomic status, so their interactive styles were diverse. Variation in nine-month infant JA--with mother and with researcher--was predicted by variation in maternal behaviour and global ratings at six months, but not at two or four months. Concurrent adult behaviour also influenced nine-month JA, independent of infant ratings. Six-month maternal behaviours that positively predicted later JA (some of which remained important at nine months) included teaching, conjoint action on a toy, and global sensitivity. Other behaviours (e.g., entertaining) negatively predicted later JA. Findings are discussed in terms of social-learning and neurobiological accounts of JA emergence

SN - 0961-205X, 0961-205X

UR - <http://search.proquest.com/docview/61797842?accountid=14701>

L2 - [http://sfx.scholarsportal.info/ottawa?url\\_ver=Z39.88-](http://sfx.scholarsportal.info/ottawa?url_ver=Z39.88-)

2004&rft\_val\_fmt=info:ofi/fmt:kev:mtx:journal&genre=article&sid=ProQ:ProQ%3Aericshell&atitle=Early+Social+Experience+and+Individual+Differences+in+Infants%27+Joint+Attention&title=Social+Development&issn=0961205X&date=2010-05-

01&volume=19&issue=2&spage=369&au=Gaffan%2C+Elizabeth+A.%3BMartins%2C+Carla%3BHealy%2C+Sarah%3BMurray%2C+Lynne&isbn=&jtitle=Social+Development&btile=&rft\_id=info:eric/EJ876357

ER -

TY - JOUR

ID - 2099

T1 - Training, Sharing or Cheating? Gamer Strategies to Get a Digital Upper Hand

A1 - Mortensen,Torill Elvira

Y1 - 2010///

KW - ERIC

KW - Unsupervised Play Addition

KW - Norway

KW - ERIC,Current Index to Journals in Education (CIJE)

KW - Programming

KW - Play

KW - Puzzles

KW - Task Analysis

KW - Fathers

KW - Computer Assisted Design

KW - Information Technology

KW - Foreign Countries

KW - Parent Child Relationship

KW - Internet

KW - Game Theory

KW - Learning Strategies

RP - NOT IN FILE

SP - 79

EP - 89

JF - E-Learning and Digital Media

VL - 7

IS - 1

PB - Symposium Journals. P.O. Box 204, Didcot, Oxford, OX11 9ZQ, UK. Tel: +44-1235-818-062; Fax: +44-1235-817-275; e-mail: [subscriptions@symposium-journals.co.uk](mailto:subscriptions@symposium-journals.co.uk); Web site: <http://www.wwwords.co.uk/elea>

N2 - Digital game-players devote a large amount of their time to discovering rules hidden in the code and discoverable through empirical study, experiments, and developing or rediscovering the mathematical formulae governing the code. They do this through their own independent play as they test areas, gear and abilities, through data mining using "add-ons", and through joint efforts outside of the game where they analyse and discuss the results from different gaming situations and create theories on how their game world works. This article shows how gamers are attracted to solving of the code puzzle and share their efforts in sites dedicated to efficient gaming, and also discusses the activity gamers call "theory crafting"--"rule mining"--, in the light of gaming as a learning strategy. (Contains 2 notes.)

SN - 2042-7530, 2042-7530

UR - <http://search.proquest.com/docview/742876829?accountid=14701>

L2 - [http://sfx.scholarsportal.info/ottawa?url\\_ver=Z39.88-](http://sfx.scholarsportal.info/ottawa?url_ver=Z39.88-)

2004&rft\_val\_fmt=info:ofi/fmt:kev:mtx:journal&genre=article&sid=ProQ:ProQ%3Aericshell&atitle=Training  
%2C+Sharing+or+Cheating%3F+Gamer+Strategies+to+Get+a+Digital+Upper+Hand&title=E-  
Learning+and+Digital+Media&issn=20427530&date=2010-01-

01&volume=7&issue=1&spage=79&au=Mortensen%2C+Torill+Elvira&isbn=&jtitle=E-

Learning+and+Digital+Media&bttitle=&rft\_id=info:eric/EJ882674

ER -

TY - THES

ID - 2100

T1 - The Effects of Peer-Mediated Intervention in Promoting Social Skills for Children with Disabilities

A1 - Harris, Kathleen I.

N1 - Last updated - 2012-12-14

SubjectsTermNotLitGenreText - 8127 11655 1474 316 8016 4542; 3924 5348 8768; 9738 909; 8299; 7940 126;  
5470; 2877; 8099; 5446 1970 1; 9753 5053 2787; 7672 5127; 7676 5449 8768; 10136 5752; 5015; 6250 7912

KW - ERIC

KW - Unsupervised Play Addition

KW - ERIC,Resources in Education (RIE)

KW - Preschool Education

KW - Program Effectiveness

KW - Play

KW - Social Behavior

KW - Mainstreaming

KW - Intervention

KW - Feedback (Response)

KW - Peer Relationship

KW - Interpersonal Competence

KW - Story Telling

KW - Disabilities

KW - Peer Influence

KW - Inclusion

KW - Social Development

KW - Preschool Children

KW - Predictor Variables

RP - NOT IN FILE

SP - 186

N2 - Peer-mediated intervention (PMI), a strategy those working in preschool inclusive environments can use, creates opportunities for peers to assume instructional roles to promote positive social behaviors for children with disabilities. The purpose of the study was threefold: first, to examine peer mediators' use of PMI during baseline and intervention; second, to examine the effects of PMI in increasing positive social behaviors and decreasing negative social behaviors of the target children; and third, to examine whether the social skills for target children improved from baseline to intervention following implementation of PMI. A multiple baseline design across participants was used to examine the effectiveness of PMI with three target children. Six children served as peer mediators and were responsible for implementing PMI strategies. Dependent variables were identified measuring child attributes essential to the social area of development (i.e., positive social behaviors) and those that were not desired or considered socially acceptable (i.e., negative social behaviors). Turn taking was selected as the essential positive social behavior for all child participants. Teacher participants trained peer mediators to administer the independent variable, peer-mediated intervention, specifically peer prompting, peer initiating, and/or giving feedback with the support of a social story during free play. Overall, results of the study indicate peer mediators implemented PMI successfully and with fidelity and little training. Target children increased positive social behaviors and decreased negative social behaviors from baseline to intervention. In addition, target children stayed the same or increased their social skills from baseline (pre) to intervention (post). Findings contribute to the literature regarding the effectiveness of PMI as an evidence-based practice for increasing positive social behaviors and decreasing negative social behaviors in the social area of development



for young children in preschool inclusive settings. [The dissertation citations contained here are published with the permission of ProQuest LLC. Further reproduction is prohibited without permission. Copies of dissertations may be obtained by Telephone (800) 1-800-521-0600. Web page: <http://www.proquest.com/en-US/products/dissertations/individuals.shtml>.]

SN - 9781124164724

UR - <http://search.proquest.com/docview/889930853?accountid=14701>

L2 - [http://sfx.scholarsportal.info/ottawa?url\\_ver=Z39.88-](http://sfx.scholarsportal.info/ottawa?url_ver=Z39.88-)

2004&rft\_val\_fmt=info:ofi/fmt:kev:mtx:dissertation&genre=unknown&sid=ProQ:ERIC&atitle=&title=The+Eff

ects+of+Peer-

Mediated+Intervention+in+Promoting+Social+Skills+for+Children+with+Disabilities&issn=&date=2010-01-

01&volume=&issue=&spage=&au=Harris%2C+Kathleen+I.&isbn=9781124164724&jtitle=&btile=&rft\_id=in

fo:eric/ED522616

ER -

TY - JOUR

ID - 2101

T1 - What Are Our Boundaries and where Can We Play? Perspectives from Eight- to Ten-Year-Old Australian Metropolitan and Rural Children

A1 - MacDougall, Colin

A1 - Schiller, Wendy

A1 - Darbyshire, Philip

Y1 - 2009/02//

KW - ERIC

KW - Unsupervised Play Addition

KW - Australia

KW - ERIC, Current Index to Journals in Education (CIJE)

KW - Childhood Attitudes

KW - Play

KW - Rural Schools

KW - Social Planning

KW - Safety

KW - Freedom

KW - Public Policy

KW - Supervision

KW - Metropolitan Areas

RP - NOT IN FILE

SP - 189

EP - 204

JF - Early Child Development and Care

VL - 179

IS - 2

PB - Routledge. , 325 Chestnut Street Suite 800, Philadelphia, PA 19106.

N2 - This study took place in an inner metropolitan Adelaide school and a rural school on Kangaroo Island off the South Australian coast. We compare 33 eight- to 10-year-old children's accounts of what the area is like for them. What are the rules and boundaries and who sets them? Metropolitan children were found to have tighter boundaries and required adult supervision to use facilities that rural children could use unsupervised. Rural children negotiated freedom of movement by considering broad principles about safety. Findings increase our understanding of how children perceive movement within their communities, and suggest policies and environmental changes to increase freedom of movement. Study findings raise concerns about the way the environment is designed for social planning, and the importance of children's engagement and interaction with the natural environment. (Contains 4 tables and 5 figures.)

SN - 0300-4430, 0300-4430

UR - <http://search.proquest.com/docview/61900982?accountid=14701>

L2 - [http://sfx.scholarsportal.info/ottawa?url\\_ver=Z39.88-](http://sfx.scholarsportal.info/ottawa?url_ver=Z39.88-)

2004&rft\_val\_fmt=info:ofi/fmt:kev:mtx:journal&genre=article&sid=ProQ:ProQ%3Aericshell&atitle=What+Ar

e+Our+Boundaries+and+where+Can+We+Play%3F+Perspectives+from+Eight-+to+Ten-Year-

Old+Australian+Metropolitan+and+Rural+Children&title=Early+Child+Development+and+Care&issn=03004430&date=2009-02-01&volume=179&issue=2&spage=189&au=MacDougall%2C+Colin%3BSchiller%2C+Wendy%3BDarbyshire%2C+Philip&isbn=&jtitle=Early+Child+Development+and+Care&bttitle=&rft\_id=info:eric/EJ827304  
ER -

TY - JOUR

ID - 2102

T1 - Maternal Scaffolding of Children's Problem Solving and Children's Adjustment in Kindergarten: Hmong Families in the United States

A1 - Stright, Anne Dopkins

A1 - Herr, Maysee Yang

A1 - Neitzel, Carin

Y1 - 2009/02//

KW - ERIC

KW - Unsupervised Play Addition

KW - ERIC, Current Index to Journals in Education (CIJE)

KW - Kindergarten

KW - Prediction

KW - Thinking Skills

KW - Play

KW - Child Behavior

KW - Persistence

KW - Parent Background

KW - Mothers

KW - Educational Attainment

KW - Problem Solving

KW - Scaffolding (Teaching Technique)

KW - Student Adjustment

KW - Parent Child Relationship

KW - Child Rearing

KW - Hmong People

KW - Beliefs

RP - NOT IN FILE

SP - 207

EP - 218

JF - Journal of Educational Psychology

VL - 101

IS - 1

PB - American Psychological Association. Journals Department, 750 First Street NE, Washington, DC 20002-4242.

N2 - The study examined relations between maternal scaffolding of children's problem solving and children's adjustment in kindergarten in Hmong families living in the United States. Mothers and their children (63 dyads) were visited the summer before kindergarten. Mothers' years in the United States, age, education, reasoning skills, and parenting beliefs were assessed. Maternal scaffolding (cognitive support, directiveness of instruction, praise, and criticism) was coded while mothers helped their children with school-like tasks. Children's reasoning skills, conscientiousness, autonomous behavior, and task persistence in kindergarten were reported by teachers at the end of kindergarten (54 children). Maternal cognitive support of children's problem solving predicted children's reasoning skills in kindergarten even after controlling for maternal education and reasoning skills. Maternal directive instruction positively predicted children's conscientious behavior and negatively predicted children's autonomous behaviors after controlling for maternal education and parenting beliefs. (Contains 3 tables.)

SN - 0022-0663, 0022-0663

UR - <http://search.proquest.com/docview/61902119?accountid=14701>

L2 - [http://sfx.scholarsportal.info/ottawa?url\\_ver=Z39.88-](http://sfx.scholarsportal.info/ottawa?url_ver=Z39.88-)

2004&rft\_val\_fmt=info:ofi/fmt:kev:mtx:journal&genre=article&sid=ProQ:ProQ%3Aericshell&atitle=Maternal

+Scaffolding+of+Children%27s+Problem+Solving+and+Children%27s+Adjustment+in+Kindergarten%3A+Hmong+Families+in+the+United+States&title=Journal+of+Educational+Psychology&issn=00220663&date=2009-02-01&volume=101&issue=1&spage=207&au=Stright%2C+Anne+Dopkins%3BHerr%2C+Maysee+Yang%3BNetzel%2C+Carin&isbn=&jtitle=Journal+of+Educational+Psychology&bttitle=&rft\_id=info:eric/EJ829240 ER -

TY - JOUR

ID - 2103

T1 - RESNA Position on the Application of Power Wheelchairs for Pediatric Users

A1 - Rosen,Lauren

A1 - Arva,Julianna

A1 - Furumasu,Jan

A1 - Harris,Michele

A1 - Lange,Michelle L.

A1 - McCarthy,Elisabeth

A1 - Kermoian,Rosanne

A1 - Pinkerton,Heather

A1 - Plummer,Teresa

A1 - Roos,Jodi

A1 - Sabet,Andrina

A1 - Vander Schaaf,Paula

A1 - Wonsettler,Terri

Y1 - 2009///

KW - ERIC

KW - Unsupervised Play Addition

KW - ERIC,Current Index to Journals in Education (CIJE)

KW - Assistive Technology

KW - age

KW - Cognitive Ability

KW - Attitudes

KW - Readiness

KW - Vision

KW - Child Development

KW - Physical Mobility

KW - CHILDREN

KW - Intellectual Development

KW - Child Safety

RP - NOT IN FILE

SP - 218

EP - 226

JF - Assistive Technology

VL - 21

IS - 4

PB - Taylor & Francis, 325 Chestnut Street Suite 800, Philadelphia, PA 19106.

N2 - This document, approved by the Rehabilitation Engineering & Assistive Technology Society of North America (RESNA) Board of Directors in March 2007, shares typical clinical applications and provides evidence from the literature supporting the use of power wheelchairs for children. It is RESNA's position that age, limited vision or cognition, behavioral issues, and the ability to walk or propel a manual wheelchair short distances should not, in and of themselves, be used as discriminatory factors against power mobility (PM) for children. RESNA recommends early utilization of PM for the appropriate candidates as medically necessary to promote psychosocial development, reduce learned helplessness, and facilitate social and educational integration and independence. It is RESNA's position that early utilization of PM for the appropriate child enhances independence, improves psychosocial development, and enables children to grow to become productive and integrated members of society. Without efficient, independent mobility, children may develop learned helplessness and experience delays in both physical and cognitive domains. Mobility should be effortless and

provide children with the opportunity to attend to and fulfill all daily tasks as typically expected from their nondisabled peers. Age, limited vision or cognition, difficulty of accessing controls, parental concerns, and the ability to utilize other means of mobility for very short distances should not, in and of themselves, eliminate the child as a candidate for PM

SN - 1040-0435, 1040-0435

UR - <http://search.proquest.com/docview/881462592?accountid=14701>

L2 - [http://sfx.scholarsportal.info/ottawa?url\\_ver=Z39.88-](http://sfx.scholarsportal.info/ottawa?url_ver=Z39.88-)

2004&rft\_val\_fmt=info:ofi/fmt:kev:mtx:journal&genre=article&sid=ProQ:ProQ%3Aericshell&atitle=RESNA+Position+on+the+Application+of+Power+Wheelchairs+for+Pediatric+Users&title=Assistive+Technology&issn=10400435&date=2009-01-

01&volume=21&issue=4&spage=218&au=Rosen%2C+Lauren%3BArva%2C+Julianna%3BFurumasu%2C+Jan%3BHarris%2C+Michele%3BLange%2C+Michelle+L.%3BMcCarthy%2C+Elisabeth%3BKermoian%2C+Rosanne%3BPinkerton%2C+Heather%3BPlummer%2C+Teresa%3BRoos%2C+Jodi%3BSabet%2C+Andrina%3BVander+Schaaf%2C+Paula%3BWonsettler%2C+Terri&isbn=&jtitle=Assistive+Technology&bttitle=&rft\_id=info:eric/EJ930338

ER -

TY - JOUR

ID - 2104

T1 - Biochemistry De-Natured--How Unstructured Outdoor Play Can Support Later Learning

A1 - White, Harold B.

Y1 - 2009///

KW - ERIC

KW - Unsupervised Play Addition

KW - ERIC, Current Index to Journals in Education (CIJE)

KW - Elementary Secondary Education

KW - Higher Education

KW - Play

KW - Folk Culture

KW - Biochemistry

KW - Problem Based Learning

KW - Leisure Time

KW - Academic Achievement

KW - Epistemology

KW - Experiential Learning

KW - Relevance (Education)

KW - College Graduates

KW - Informal Education

KW - Low Achievement

KW - Grade Inflation

KW - Outdoor Education

KW - Discovery Learning

RP - NOT IN FILE

SP - 369

EP - 370

JF - Biochemistry and Molecular Biology Education

VL - 37

IS - 6

PB - John Wiley & Sons, Subscription Department, 111 River Street, Hoboken, NJ 07030-5774.

N2 - The concurrent improvement in average grades earned by college graduates would seem to indicate better quality students, although some observers attribute that to grade inflation. From the author's perspective derived from almost four decades of teaching at one institution, students are intellectually as good as ever; however, the author sees a big decrease in their common knowledge and awareness of natural history and the out-of-doors that often provide the context for future learning. A substantial proportion of today's college students spent their free time as children indoors watching television or interacting with a computer screen in air-conditioned comfort during the summer and with central heating in the winter. They grew up separated from what were

everyday experiences a generation or two ago. In this article, the author contends that students' experiences in unsupervised outdoor play in their childhood lay the groundwork for future learning in any science. The author stresses that students would have an easier time with biochemistry if it were not "denatured," and urges teachers to help students make connections between the classroom and the world outside

SN - 1470-8175, 1470-8175

UR - <http://search.proquest.com/docview/61821215?accountid=14701>

L2 - [http://sfx.scholarsportal.info/ottawa?url\\_ver=Z39.88-](http://sfx.scholarsportal.info/ottawa?url_ver=Z39.88-)

2004&rft\_val\_fmt=info:ofi/fmt:kev:mtx:journal&genre=article&sid=ProQ:ProQ%3Aericshell&atitle=Biochemistry+De-Natured--

How+Unstructured+Outdoor+Play+Can+Support+Later+Learning&title=Biochemistry+and+Molecular+Biology+Education&issn=14708175&date=2009-01-

01&volume=37&issue=6&spage=369&au=White%2C+Harold+B.&isbn=&jtitle=Biochemistry+and+Molecular+Biology+Education&bttitle=&rft\_id=info:eric/EJ867632

ER -

TY - JOUR

ID - 2105

T1 - What's Age Gotta Do with It? Understanding the Age-Identities and School-Going Practices of Mexican Immigrant Youth in New York City

A1 - Martinez, Isabel

Y1 - 2009///

KW - ERIC

KW - Unsupervised Play Addition

KW - United States

KW - Mexico

KW - ERIC, Current Index to Journals in Education (CIJE)

KW - Secondary Education

KW - Mexicans

KW - Undocumented Immigrants

KW - Play

KW - Immigration

KW - Immigrants

KW - Role Conflict

KW - Educational Needs

KW - Labor

KW - Adolescent Attitudes

KW - Foreign Countries

KW - Developmental Stages

KW - Education Work Relationship

RP - NOT IN FILE

SP - 34

EP - 48

JF - High School Journal

VL - 92

IS - 4

PB - University of North Carolina Press. 116 South Boundary Street, P.O. Box 2288, Chapel Hill, NC 27515-2288.

N2 - Recent reports of out-of-school immigrant youth have brought attention to predominantly Mexican and Central American immigrant youth who immigrate to the United States and do not enroll in formal schooling (Fry, 2002; Hill and Hayes, 2007). Many arrive to the United States unaccompanied, joining their older, undocumented counterparts in becoming part of the undocumented labor queue (Esquivel, 2007). New York City is one of the more recent destinations for these immigrant youth, with Mexicans leading all immigrant groups in terms of the highest percentage of school-age youth not in school. This article examines how these youth understand their life stages, both pre-immigration in Mexico and post-immigration in New York City, as well as the behaviors and actions they undertake in both contexts that lead to earlier and more rapid transitions

to adulthood across the transnational social space. Most often considering themselves adults, these youth remain outside of formal high schools to meet their own labor and life demands. (Contains 3 footnotes.)

SN - 0018-1498, 0018-1498

UR - <http://search.proquest.com/docview/61877296?accountid=14701>

L2 - [http://sfx.scholarsportal.info/ottawa?url\\_ver=Z39.88-](http://sfx.scholarsportal.info/ottawa?url_ver=Z39.88-)

2004&rft\_val\_fmt=info:ofi/fmt:kev:mtx:journal&genre=article&sid=ProQ:ProQ%3Aericshell&atitle=What%27s+Age+Gotta+Do+with+It%3F+Understanding+the+Age-Identities+and+School-Going+Practices+of+Mexican+Immigrant+Youth+in+New+York+City&title=High+School+Journal&issn=00181498&date=2009-01-

01&volume=92&issue=4&spage=34&au=Martinez%2C+Isabel&isbn=&jtitle=High+School+Journal&bttitle=&rft\_id=info:eric/EJ837055

ER -

TY - JOUR

ID - 2106

T1 - Holding in Mind Conflicting Information: Pretending, Working Memory, and Executive Control

A1 - Albertson, Kathleen

A1 - Shore, Cecilia

Y1 - 2008/10//

KW - ERIC

KW - Unsupervised Play Addition

KW - ERIC, Current Index to Journals in Education (CIJE)

KW - Early Childhood Education

KW - Play

KW - Young Children

KW - Recall (Psychology)

KW - Identification

KW - Preschool Children

KW - Short Term Memory

RP - NOT IN FILE

SP - 390

EP - 410

JF - Journal of Cognition and Development

VL - 9

IS - 4

PB - Psychology Press. , 325 Chestnut Street Suite 800, Philadelphia, PA 19106.

N2 - Preschoolers' recall of the true and pretend identities of an object in pretense was examined along with a battery of executive functioning and working memory tasks. We expected that children would retain separate identities, as well as a link between them, after observing episodes of pretense, and that memory for pretense would be related to executive functioning and working memory. Children (aged 37-59 months) recalled the true identity of an object better than its pretend identity. Children's recall of at least one identity was correlated with executive functioning and "dual" working memory tasks, independent of age and verbal ability. Memory for both identities was only correlated with executive functioning. The findings are generally supportive of the claim that children form separate representations of the true and pretend identities of objects. The results extend findings of well-established relations between false belief tasks and executive functioning and working memory. (Contains 3 tables.)

SN - 1524-8372, 1524-8372

UR - <http://search.proquest.com/docview/61897310?accountid=14701>

L2 - [http://sfx.scholarsportal.info/ottawa?url\\_ver=Z39.88-](http://sfx.scholarsportal.info/ottawa?url_ver=Z39.88-)

2004&rft\_val\_fmt=info:ofi/fmt:kev:mtx:journal&genre=article&sid=ProQ:ProQ%3Aericshell&atitle=Holding+in+Mind+Conflicting+Information%3A+Pretending%2C+Working+Memory%2C+and+Executive+Control&title=Journal+of+Cognition+and+Development&issn=15248372&date=2008-10-

01&volume=9&issue=4&spage=390&au=Albertson%2C+Kathleen%3BShore%2C+Cecilia&isbn=&jtitle=Journal+of+Cognition+and+Development&bttitle=&rft\_id=info:eric/EJ827765

ER -

TY - JOUR

ID - 2108

T1 - Learning by Looking: Infants' Social Looking Behavior across the Transition from Crawling to Walking

A1 - Clearfield,Melissa W.

A1 - Osborne,Christine N.

A1 - Mullen,Molly

Y1 - 2008/08//

KW - ERIC

KW - Unsupervised Play Addition

KW - ERIC,Current Index to Journals in Education (CIJE)

KW - Interaction

KW - Physical Activities

KW - Motor Development

KW - Play

KW - Developmental Stages

KW - Visual Stimuli

KW - Psychomotor Skills

KW - Interpersonal Relationship

KW - Age Differences

KW - Social Environment

KW - Infants

RP - NOT IN FILE

SP - 297

EP - 307

JF - Journal of Experimental Child Psychology

JA - J Exp.Child Psychol.

VL - 100

IS - 4

PB - Elsevier. 6277 Sea Harbor Drive, Orlando, FL 32887-4800.

N2 - This study investigated how infants gather information about their environment through looking and how that changes with increases in motor skills. In Experiment 1, 9.5- and 14-month-olds participated in a 10-min free play session with both a stranger and ambiguous toys present. There was a significant developmental progression from passive to active social engagement, as evidenced by younger infants watching others communicate more and older infants making more bids for social interaction. Experiment 2 examined longitudinally the impact of age and walking onset on this progression. The transition to independent walking marked significant changes in how often infants watched others communicate and made active bids for social interaction. Results suggest that infants transition from passive observers as crawlers to active participants in their social environment with the onset of walking. (Contains 4 figures and 1 table.)

SN - 0022-0965, 0022-0965

UR - <http://search.proquest.com/docview/61999582?accountid=14701>

L2 - [http://sfx.scholarsportal.info/ottawa?url\\_ver=Z39.88-](http://sfx.scholarsportal.info/ottawa?url_ver=Z39.88-)

2004&rft\_val\_fmt=info:ofi/fmt:kev:mtx:journal&genre=article&sid=ProQ:ProQ%3Aericshell&atitle=Learning+by+Looking%3A+Infants%27+Social+Looking+Behavior+across+the+Transition+from+Crawling+to+Walking&title=Journal+of+Experimental+Child+Psychology&issn=00220965&date=2008-08-

01&volume=100&issue=4&spage=297&au=Clearfield%2C+Melissa+W.%3B+Osborne%2C+Christine+N.%3B+Mullen%2C+Molly&isbn=&jtitle=Journal+of+Experimental+Child+Psychology&bttitle=&rft\_id=info:eric/EJ804148

ER -

TY - JOUR

ID - 2109

T1 - The Effects of Praising Qualifying Autoclitics on the Frequency of Reading

A1 - Hubner,M.M.

A1 - Austin,J.

A1 - Miguel,F.C.

Y1 - 2008//

KW - ERIC  
KW - Unsupervised Play Addition  
KW - Brazil  
KW - ERIC,Current Index to Journals in Education (CIJE)  
KW - Positive Reinforcement  
KW - Verbal Communication  
KW - Foreign Countries  
KW - Play  
KW - Independent Reading  
KW - Reading Fluency  
KW - Intervention  
KW - Reading Motivation  
KW - Outcomes of Treatment  
RP - NOT IN FILE  
SP - 55  
EP - 62  
JF - Analysis of Verbal Behavior  
VL - 24  
PB - Association for Behavior Analysis International. 1219 South Park Street, Kalamazoo, MI 49001.  
N2 - In the current study, tacts with positive qualifying autoclitics for reading were reinforced in order to determine if this procedure would increase the time spent reading by participants. Participants included 5 children, between 9-10 years old. Participants were individually exposed to 4 free operant sessions during which they were instructed to independently choose play activities. During pre- and post-treatment conditions, no consequences were provided for choosing reading. In addition, 4 treatment sessions were conducted on days separate from the free operant session days, during which the experimenter praised each positive reading-related statement emitted by the participant. Following treatment sessions, 4 out of 5 participants increased the time allocated to reading, suggesting that reading could be increased when praise is delivered contingent upon positive reading-related verbalizations. (Contains 5 figures.)  
SN - 0889-9401, 0889-9401  
UR - <http://search.proquest.com/docview/61806021?accountid=14701>  
L2 - [http://sfx.scholarsportal.info/ottawa?url\\_ver=Z39.88-2004&rft\\_val\\_fmt=info:ofi/fmt:kev:mtx:journal&genre=article&sid=ProQ:ProQ%3Aericshell&atitle=The+Effects+of+Praising+Qualifying+Autoclitics+on+the+Frequency+of+Reading&title=Analysis+of+Verbal+Behavior&issn=08899401&date=2008-01-01&volume=24&issue=&spage=55&au=Hubner%2C+M.+M.%3BAustin%2C+J.%3BMiguel%2C+F.+C.&isbn=&jtitle=Analysis+of+Verbal+Behavior&bttitle=&rft\\_id=info:eric/EJ869174](http://sfx.scholarsportal.info/ottawa?url_ver=Z39.88-2004&rft_val_fmt=info:ofi/fmt:kev:mtx:journal&genre=article&sid=ProQ:ProQ%3Aericshell&atitle=The+Effects+of+Praising+Qualifying+Autoclitics+on+the+Frequency+of+Reading&title=Analysis+of+Verbal+Behavior&issn=08899401&date=2008-01-01&volume=24&issue=&spage=55&au=Hubner%2C+M.+M.%3BAustin%2C+J.%3BMiguel%2C+F.+C.&isbn=&jtitle=Analysis+of+Verbal+Behavior&bttitle=&rft_id=info:eric/EJ869174)  
ER -  
  
TY - JOUR  
ID - 2110  
T1 - Reciprocity of Prosocial Behavior in Japanese Preschool Children  
A1 - Fujisawa,Keiko K.  
A1 - Kutsukake,Nobuyuki  
A1 - Hasegawa,Toshikazu  
Y1 - 2008///  
KW - ERIC  
KW - Unsupervised Play Addition  
KW - Japan  
KW - ERIC,Current Index to Journals in Education (CIJE)  
KW - Preschool Education  
KW - Friendship  
KW - Play  
KW - Helping Relationship  
KW - Child Behavior  
KW - Correlation  
KW - Preschool Children



KW - Prosocial Behavior

KW - Peer Relationship

RP - NOT IN FILE

SP - 89

EP - 97

JF - International Journal of Behavioral Development

VL - 32

IS - 2

PB - SAGE Publications. 2455 Teller Road, Thousand Oaks, CA 91320.

N2 - This study investigated the reciprocity of prosocial behavior among 3- and 4-year-old Japanese preschool children during free-play time. Matrix correlation tests revealed positive correlations between the frequencies of object offering given and received within dyads and between the frequencies of helping given and received within dyads. These results suggest that young children reciprocate prosocial behavior spontaneously. Positive correlations were also found between the frequencies of object offering and helping behavior exchanged within dyads, suggesting that children exchanged the two types of prosocial behaviors (i.e., "interchanged"). The interchange was independent of both reciprocity within object offering and reciprocity within helping behavior in 4-year-olds. Friends reciprocated object offerings more frequently than non-friends, suggesting that friendship affects the quantitative aspect of reciprocity. These data provide refined evidence of reciprocity among children and also suggest that reciprocity becomes more complicated as children grow older. (Contains 5 tables.)

SN - 0165-0254, 0165-0254

UR - <http://search.proquest.com/docview/61956911?accountid=14701>

L2 - [http://sfx.scholarsportal.info/ottawa?url\\_ver=Z39.88-](http://sfx.scholarsportal.info/ottawa?url_ver=Z39.88-)

2004&rft\_val\_fmt=info:ofi/fmt:kev:mtx:journal&genre=article&sid=ProQ:ProQ%3Aericshell&atitle=Reciprocity+of+Prosocial+Behavior+in+Japanese+Preschool+Children&title=International+Journal+of+Behavioral+Development&issn=01650254&date=2008-01-01&volume=32&issue=2&spage=89&au=Fujisawa%2C+Keiko+K.%3BKutsukake%2C+Nobuyuki%3BHasegawa%2C+Toshikazu&isbn=&jtitle=International+Journal+of+Behavioral+Development&btitle=&rft\_id=info:eric/EJ793689

ER -

TY - JOUR

ID - 2112

T1 - Use of Songs to Promote Independence in Morning Greeting Routines for Young Children with Autism

A1 - Kern,Petra

A1 - Wolery,Mark

A1 - Aldridge,David

Y1 - 2007/08//

KW - ERIC

KW - Unsupervised Play Addition

KW - ERIC,Current Index to Journals in Education (CIJE)

KW - Early Childhood Education

KW - Music Therapy

KW - Play

KW - Inclusive Schools

KW - Young Children

KW - Autism

KW - Singing

KW - Teaching Methods

KW - Peer Relationship

RP - NOT IN FILE

SP - 1264

EP - 1271

JF - Journal of Autism and Developmental Disorders

VL - 37

IS - 7

PB - Springer. 233 Spring Street, New York, NY 10013.

N2 - This study evaluated the effects of individually composed songs on the independent behaviors of two young children with autism during the morning greeting/entry routine into their inclusive classrooms. A music therapist composed a song for each child related to the steps of the morning greeting routine and taught the children's teachers to sing the songs during the routine. The effects were evaluated using a single subject withdrawal design. The results indicate that the songs, with modifications for one child, assisted the children in entering the classroom, greeting the teacher and/or peers and engaging in play. For one child, the number of peers who greeted him was also measured, and increased when the song was used

SN - 0162-3257, 0162-3257

UR - <http://search.proquest.com/docview/62052752?accountid=14701>

L2 - [http://sfx.scholarsportal.info/ottawa?url\\_ver=Z39.88-](http://sfx.scholarsportal.info/ottawa?url_ver=Z39.88-)

2004&rft\_val\_fmt=info:ofi/fmt:kev:mtx:journal&genre=article&sid=ProQ:ProQ%3Aericshell&atitle=Use+of+Songs+to+Promote+Independence+in+Morning+Greeting+Routines+for+Young+Children+with+Autism&title=Journal+of+Autism+and+Developmental+Disorders&issn=01623257&date=2007-08-01&volume=37&issue=7&spage=1264&au=Kern%2C+Petra%3BWolery%2C+Mark%3BAldridge%2C+David&isbn=&jtitle=Journal+of+Autism+and+Developmental+Disorders&btitle=&rft\_id=info:eric/EJ771532

ER -

TY - JOUR

ID - 2113

T1 - "THOMAS" Training: An Early Years Intervention for Children with an Autistic Spectrum Disorder (ASD)

A1 - Medhurst,Belinda

A1 - Beresford,Jayne

Y1 - 2007/03//

KW - ERIC

KW - Unsupervised Play Addition

KW - United Kingdom

KW - ERIC,Current Index to Journals in Education (CIJE)

KW - Early Childhood Education

KW - Program Effectiveness

KW - Play

KW - Young Children

KW - Training

KW - Pervasive Developmental Disorders

KW - Intervention

KW - Skill Development

KW - Antisocial Behavior

KW - Foreign Countries

KW - Interpersonal Competence

KW - Interpersonal Communication

KW - Early Intervention

KW - Program Evaluation

KW - Autism

RP - NOT IN FILE

SP - 1

EP - 17

JF - Educational Psychology in Practice

VL - 23

IS - 1

PB - Routledge. , 325 Chestnut Street Suite 800, Philadelphia, PA 19106.

N2 - The "THOMAS" course (The Hampshire Outline for Meeting the needs of under fives on the Autistic Spectrum) is a four-day training programme to enhance the learning of young children with impairments in social understanding, communication and play by increasing the use of appropriate interventions. It has been supporting families and professionals in the early years settings for over five years and feedback has been exceptionally positive. This article reviews the extent to which training skills have been embedded in the long-

term. Results indicate that the training is still as effective a year on, with many techniques, including visual structure and behaviour management, seen as highly effective interventions. Furthermore, there is an indication that course participants may experience an increase in confidence that enables them to become more independent and generate their own solutions as skills and knowledge become embedded over time. (Contains 6 tables.)

SN - 0266-7363, 0266-7363

UR - <http://search.proquest.com/docview/62040365?accountid=14701>

L2 - [http://sfx.scholarsportal.info/ottawa?url\\_ver=Z39.88-](http://sfx.scholarsportal.info/ottawa?url_ver=Z39.88-)

2004&rft\_val\_fmt=info:ofi/fmt:kev:mtx:journal&genre=article&sid=ProQ:ProQ%3Aericshell&atitle=%22THOMAS%22+Training%3A+An+Early+Years+Intervention+for+Children+with+an+Autistic+Spectrum+Disorder+%28ASD%29&title=Educational+Psychology+in+Practice&issn=02667363&date=2007-03-

01&volume=23&issue=1&spage=1&au=Medhurst%2C+Belinda%3BBeresford%2C+Jayne&isbn=&jtitle=Educational+Psychology+in+Practice&bttitle=&rft\_id=info:eric/EJ764161

ER -

TY - JOUR

ID - 2114

T1 - A Meta-Analytic Investigation of Therapy Modality Outcomes for Sexually Abused Children and Adolescents: An Exploratory Study

A1 - Hetzel-Riggin, Melanie D.

A1 - Brausch, Amy M.

A1 - Montgomery, Brad S.

Y1 - 2007/02//

KW - ERIC

KW - Unsupervised Play Addition

KW - ERIC, Current Index to Journals in Education (CIJE)

KW - Program Effectiveness

KW - psychology

KW - Group Therapy

KW - Behavior Problems

KW - Outcomes of Treatment

KW - Play Therapy

KW - Symptoms (Individual Disorders)

KW - Counseling Techniques

KW - Psychological Patterns

KW - Meta Analysis

KW - Behavior Modification

KW - Counseling Effectiveness

KW - Cognitive Restructuring

KW - Sexual Abuse

KW - Child Abuse

KW - Adolescents

RP - NOT IN FILE

SP - 125

EP - 141

JF - Child Abuse & Neglect: The International Journal

VL - 31

IS - 2

PB - Elsevier. 6277 Sea Harbor Drive, Orlando, FL 32887-4800.

N2 - Objective: The purpose of the current study was to investigate the independent effects of different treatment elements on a number of secondary problems related to childhood and adolescent sexual abuse, as well as investigate a number of different moderators of treatment effectiveness. Method: Twenty-eight studies that provided treatment outcome results for children and adolescents who had been sexually abused were included in the meta-analysis. Different aspects of psychological treatment, such as specific treatment modalities (individual, cognitive-behavioral, etc.) or secondary problems (behavior problems, psychological distress, etc.) were investigated. Results: The overall mean weighted effect size for the meta-analysis was

$d=0.72$  ( $SE=0.02$ ). The results indicate that psychological treatment after childhood or adolescent sexual abuse tended to result in better outcomes than no treatment. There was significant heterogeneity in the effectiveness of the various psychological treatment elements. Play therapy seemed to be the most effective treatment for social functioning, whereas cognitive-behavioral, abuse-specific, and supportive therapy in either group or individual formats was most effective for behavior problems. Cognitive-behavioral, family, and individual therapy seemed to be the most effective for psychological distress, and abuse-specific, cognitive-behavioral, and group therapy appeared to be the most effective for low self-concept. Conclusions: The choice of therapy modality should depend on the child's main presenting secondary problem. Further research should be conducted investigating other possible moderators and secondary problem outcomes

SN - 0145-2134, 0145-2134

UR - <http://search.proquest.com/docview/62033316?accountid=14701>

L2 - [http://sfx.scholarsportal.info/ottawa?url\\_ver=Z39.88-](http://sfx.scholarsportal.info/ottawa?url_ver=Z39.88-)

2004&rft\_val\_fmt=info:ofi/fmt:kev:mtx:journal&genre=article&sid=ProQ:ProQ%3Aericshell&atitle=A+Meta-Analytic+Investigation+of+Therapy+Modality+Outcomes+for+Sexually+Abused+Children+and+Adolescents%3A+An+Exploratory+Study&title=Child+Abuse+%26+Neglect%3A+The+International+Journal&issn=01452134&date=2007-02-01&volume=31&issue=2&spage=125&au=Hetzl-Riggin%2C+Melanie+D.%3BBrausch%2C+Amy+M.%3BMontgomery%2C+Brad+S.&isbn=&jtitle=Child+Abuse+%26+Neglect%3A+The+International+Journal&btitle=&rft\_id=info:eric/EJ755893

ER -

TY - JOUR

ID - 2115

T1 - Learning about Life--Through Books!

A1 - Neuman,Susan B.

Y1 - 2007///

KW - ERIC

KW - Unsupervised Play Addition

KW - ERIC,Current Index to Journals in Education (CIJE)

KW - Teachers

KW - Early Childhood Education

KW - Kindergarten

KW - Preschool Education

KW - Preschool Teachers

KW - Reading Material Selection

KW - Young Children

KW - Dramatic Play

KW - Academic Achievement

KW - Childrens Literature

KW - Written Language

KW - Story Reading

KW - Reader Text Relationship

KW - Reading Aloud to Others

KW - Creative Thinking

KW - Parent Participation

KW - Emergent Literacy

RP - NOT IN FILE

SP - 34

EP - 43

JF - Early Childhood Today

VL - 21

IS - 4

PB - Scholastic. 557 Broadway, New York, NY 10012.

N2 - The early years are a time of joy and a period of great learning for young children. They are beginning to interact with print and experience the delights of being read to. This article presents the experiences of a kindergarten teacher during her class' independent reading time. Aside from just plain fun, children can acquire a wide range of knowledge and skills about the world and about written language. "Why", "how", and "what" is

read to young children has enormous significance in terms of the role books will play in school achievement and in enriching children's lives. The significance of reading books includes the following: (1) building skills; (2) making connections; and (3) supporting creative thinking. A good selection of books from traditional, fantasy, information, poetry and rhyme, predictable, and alphabet is important for young children. This article presents recommendations for reading to children. In addition, choosing books for children at different ages and stages, sharing books age by age, and home-school connection are described. (Contains 5 resources and 4 online resources.)

SN - 1070-1214, 1070-1214

UR - <http://search.proquest.com/docview/62047493?accountid=14701>

L2 - [http://sfx.scholarsportal.info/ottawa?url\\_ver=Z39.88-](http://sfx.scholarsportal.info/ottawa?url_ver=Z39.88-)

2004&rft\_val\_fmt=info:ofi/fmt:kev:mtx:journal&genre=article&sid=ProQ:ProQ%3Aericshell&atitle=Learning+about+Life--Through+Books%21&title=Early+Childhood+Today&issn=10701214&date=2007-01-01&volume=21&issue=4&spage=34&au=Neuman%2C+Susan+B.&isbn=&jtitle=Early+Childhood+Today&bt

ER -

TY - JOUR

ID - 2116

T1 - Mental Playmates: Siblings, Executive Functioning and Theory of Mind

A1 - McAlister, Anna

A1 - Peterson, Candida C.

Y1 - 2006/11//

KW - ERIC

KW - Unsupervised Play Addition

KW - ERIC, Current Index to Journals in Education (CIJE)

KW - Play

KW - Multiple Regression Analysis

KW - Language Aptitude

KW - Developmental Psychology

KW - Imagination

KW - Cognitive Processes

KW - theory of mind

KW - Interpersonal Communication

KW - Siblings

KW - Preschool Children

KW - Age Differences

KW - Predictor Variables

RP - NOT IN FILE

SP - 733

EP - 751

JF - British Journal of Developmental Psychology

VL - 24

IS - 4

PB - British Psychological Society. St Andrews House, 48 Princess Road East, Leicester, LE1 7DR, UK. Tel: +44-116-254-9568; Fax: +44-116-227-1314; e-mail: [enquiry@bps.org.uk](mailto:enquiry@bps.org.uk); Web site:

<http://www.bpsjournals.co.uk>

N2 - This study assessed the theory of mind (ToM) and executive functioning (EF) abilities of 124 typically developing preschool children aged 3 to 5 years in relation to whether or not they had a child-aged sibling (i.e. a child aged 1 to 12 years) at home with whom to play and converse. On a ToM battery that included tests of false belief, appearance-reality (AR) and pretend representation, children who had at least 1 child-aged sibling scored significantly higher than both only children and those whose only siblings were infants or adults. The numbers of child-aged siblings in preschoolers' families positively predicted their scores on both a ToM battery (4 tasks) and an EF battery (2 tasks), and these associations remained significant with language ability partialled out. Results of a hierarchical multiple regression analysis revealed that independent contributions to individual differences in ToM were made by language ability, EF skill and having a child-aged sibling. However, even though some conditions for mediation were met, there was no statistically reliable evidence that EF skills

mediated the advantage of presence of child-aged siblings for ToM performance. While consistent with the theory that distinctively childish interaction among siblings accelerates the growth of both ToM and EF capacities, alternative evidence and alternative theoretical interpretations for the findings were also considered  
 SN - 0261-510X, 0261-510X

UR - <http://search.proquest.com/docview/964170587?accountid=14701>

L2 - [http://sfx.scholarsportal.info/ottawa?url\\_ver=Z39.88-](http://sfx.scholarsportal.info/ottawa?url_ver=Z39.88-)

2004&rft\_val\_fmt=info:ofi/fmt:kev:mtx:journal&genre=article&sid=ProQ:ProQ%3Aericshell&atitle=Mental+P  
 laymates%3A+Siblings%2C+Executive+Functioning+and+Theory+of+Mind&title=British+Journal+of+Develo  
 pmental+Psychology&issn=0261510X&date=2006-11-

01&volume=24&issue=4&page=733&au=McAlister%2C+Anna%3BPeterson%2C+Candida+C.&isbn=&jtitle  
 =British+Journal+of+Developmental+Psychology&bttitle=&rft\_id=info:eric/EJ941085

ER -

TY - JOUR

ID - 2118

T1 - Cooperation and Conversations about the Mind: A Study of Individual Differences in 2-Year-Olds and Their Siblings

A1 - Hughes,Claire

A1 - Fujisawa,Keiko K.

A1 - Ensor,Rosie

A1 - Lecce,Serena

A1 - Marfleet,Rachel

Y1 - 2006/03//

KW - ERIC

KW - Unsupervised Play Addition

KW - ERIC,Current Index to Journals in Education (CIJE)

KW - Early Childhood Education

KW - Family Characteristics

KW - Play

KW - Video Technology

KW - theory of mind

KW - Sibling Relationship

KW - Young Children

KW - Individual Differences

KW - Gender Differences

KW - Verbal Ability

KW - Siblings

KW - Developmental Psychology

RP - NOT IN FILE

SP - 53

EP - 72

JF - British Journal of Developmental Psychology

VL - 24

IS - 1

PB - British Psychological Society. St Andrews House, 48 Princess Road East, Leicester, LE1 7DR, UK. Tel: +44-116-254-9568; Fax: +44-116-227-1314; e-mail: [enquiry@bps.org.uk](mailto:enquiry@bps.org.uk); Web site:

<http://www.bpsjournals.co.uk>

N2 - Sibling relationships appear important in fostering young children's growing theory-of-mind skills, but the quality of sibling interactions has rarely been investigated directly in relation to children's mental-state awareness (e.g. as indexed by talk about perceptions, desires, feelings, cognitions, i.e. inner state talk; IST). This study explored individual differences in young siblings' IST in relation to (i) child characteristics (verbal ability and theory-of-mind task performance); (ii) family characteristics (sib-ship size; social disadvantage, maternal well-being); and (iii) the quality of the children's play with their siblings (frequencies of pretence and reciprocal play). A socially diverse sample of 111 2-year-olds was filmed at home playing with a sib (mean age =4.92 years; SD=1.67 years); these sessions were coded from video for reciprocal play and then transcribed and coded for IST and pretence. Verbal ability was assessed for both sibs; in addition, 2-year-olds completed theory-of-

mind tasks. Age and verbal ability were correlated with frequencies of overall talk, IST, pretence and reciprocal play. (Theory-of-mind scores were also correlated with 2-year-olds' IST, but this relation fell below significance once verbal ability was controlled). Significant independent relations were found between IST and children's quality of play, even when age, verbal ability and overall rates of talk were controlled. Although there were no gender contrasts in mean rates or in the variety of IST, gender differences were found in their correlates: in particular, context effects were significantly more important for girls than for boys. Individual differences in children's IST reflect multiple factors, including the dynamic features of children's reciprocal play

SN - 0261-510X, 0261-510X

UR - <http://search.proquest.com/docview/964173440?accountid=14701>

L2 - [http://sfx.scholarsportal.info/ottawa?url\\_ver=Z39.88-](http://sfx.scholarsportal.info/ottawa?url_ver=Z39.88-)

2004&rft\_val\_fmt=info:ofi/fmt:kev:mtx:journal&genre=article&sid=ProQ:ProQ%3Aericshell&atitle=Cooperati  
on+and+Conversations+about+the+Mind%3A+A+Study+of+Individual+Differences+in+2-Year-  
Olds+and+Their+Siblings&title=British+Journal+of+Developmental+Psychology&issn=0261510X&date=2006  
-03-

01&volume=24&issue=1&spage=53&au=Hughes%2C+Claire%3BFujisawa%2C+Keiko+K.%3BEnsor%2C+R  
osie%3BLecce%2C+Serena%3BMarfleet%2C+Rachel&isbn=&jtitle=British+Journal+of+Developmental+Psc  
hology&bttitle=&rft\_id=info:eric/EJ941019

ER -

TY - GEN

ID - 2119

T1 - Activity Schedules, Computer Technology, and Teaching Children with Autism Spectrum Disorders

A1 - Stromer,Robert

A1 - Kimball,Jonathan W.

A1 - Kinney,Elisabeth M.

A1 - Taylor,Bridget A.

Y1 - 2006///

N1 - Last updated - 2012-12-14

KW - ERIC

KW - Unsupervised Play Addition

KW - ERIC,Current Index to Journals in Education (CIJE)

KW - Practitioners

KW - Researchers

KW - Elementary Secondary Education

KW - Play

KW - Scheduling

KW - Pictorial Stimuli

KW - Learning Activities

KW - CHILDREN

KW - SOCIALIZATION

KW - Computer Uses in Education

KW - Autism

KW - Skill Development

KW - Communication Skills

RP - NOT IN FILE

SP - 14

EP - 24

JF - Focus on Autism and Other Developmental Disabilities

VL - 21

IS - 1

PB - PRO-ED, 8700 Shoal Creek Boulevard, Austin, TX 78757-6897.

N2 - A review of selected literature suggests that integrating multimedia computer supports with activity schedules can be an effective way to teach students to manage their work, play, and skill-building activities independently. Activity schedules originally were a means of promoting independent execution of previously learned responses by using pictures and words in notebooks or lists to cue a student's performance of a sequence of activities. As activity schedules subsequently became more technologically elaborate, they also evolved as a

means of expanding existing repertoires. Preliminary studies illustrate how activity schedules delivered on the computer may engender new learning via the videos, sounds, dialogue, images, and words employed as instructional stimuli. For the researcher, the blend of computer and notebook activity schedules provides a framework for studies on teaching play, socialization, and communication. For the practitioner, use of activity schedules addresses pressing needs to teach generative and functional skills

UR - <http://search.proquest.com/docview/62014949?accountid=14701>

L2 - [http://sfx.scholarsportal.info/ottawa?url\\_ver=Z39.88-](http://sfx.scholarsportal.info/ottawa?url_ver=Z39.88-)

2004&rft\_val\_fmt=info:ofi/fmt:kev:mtx:journal&genre=article&sid=ProQ:ProQ%3Aericshell&atitle=Activity+Schedules%2C+Computer+Technology%2C+and+Teaching+Children+with+Autism+Spectrum+Disorders&title=Focus+on+Autism+and+Other+Developmental+Disabilities&issn=10883576&date=2006-01-01&volume=21&issue=1&spage=14&au=Stromer%2C+Robert%3BKimball%2C+Jonathan+W.%3BKinney%2C+Elisabeth+M.%3BTaylor%2C+Bridget+A.&isbn=&jtitle=Focus+on+Autism+and+Other+Developmental+Disabilities&bttitle=&rft\_id=info:eric/EJ757992

ER -

TY - JOUR

ID - 2120

T1 - Conditioned Observation of Books and Accelerated Acquisition of Textual Responding by Preschool Children

A1 - Tsai,Hshin hui

A1 - Greer,Douglas R.

Y1 - 2006///

KW - ERIC

KW - Unsupervised Play Addition

KW - ERIC,Current Index to Journals in Education (CIJE)

KW - Early Childhood Education

KW - Preschool Education

KW - Play

KW - Conditioning

KW - Responses

KW - Books

KW - Reinforcement

KW - Observation

KW - Toys

KW - Preschool Children

RP - NOT IN FILE

SP - 35

EP - 61

JF - Journal of Early and Intensive Behavior Intervention

VL - 3

IS - 1

PB - Joseph Cautilli, Ph.D. & The Behavior Analyst Online Organization. 535 Queen Street, Philadelphia, PA 19147-3220.

N2 - We report an experiment investigating the effects of conditioning books as reinforcers for observing responses on the learning of textual responses by pre-school children. The independent variable was the acquisition of conditioned reinforcement of observing responses and choice of book stimuli in free play settings where children could choose to play with toys or look at books. Prior to the conditioning procedures, the children played with toys and did not look at books in free time in 4 preconditioning 5-minute free-play sessions. During the treatment we conducted simultaneous stimulus conditioning procedures until looking at books became the preferred free-play activity. The dependent variable consisted of the numbers of learn-units-to-mastery of textual responses before and after conditioning books as reinforcers for observing responses. Three boys and one girl (ages 2 years and 9 months to 4 years) participated in the experiment in a pre and post learn-units-to-criterion and simultaneous matched-pairs design with a time-lagged component. Prior to reinforcement conditioning, we matched children in pairs based on learn units they required to master a sets of 5 counterbalanced word sets. One child in each of 2 pairs received book conditioning initially, and another child received an equal number of conditioning trials with toys, as a control conditions, and then book conditioning.



The results showed that (1) all four children required fewer learn-units-to-criterion on textual responses after books were conditioned as reinforcers for choice and observing and those who received the book conditioning first performed best. (2) Three of the four children maintained preference for books at 33%, 83%, and 100% of time in free play probes at 1 month. (3) There were no maintenance effects on accuracy of textual responding. (Contains 2 tables and 6 figures.)

SN - 1554-4893, 1554-4893

UR - <http://search.proquest.com/docview/61859823?accountid=14701>

ER -

TY - JOUR

ID - 2121

T1 - The Effects of a Stimulus-Stimulus Pairing Procedure on the Acquisition of Conditioned Reinforcement on Observing and Manipulating Stimuli by Young Children with Autism

A1 - Longano, Jennifer M.

A1 - Greer, Douglas R.

Y1 - 2006//

KW - ERIC

KW - Unsupervised Play Addition

KW - ERIC, Current Index to Journals in Education (CIJE)

KW - Play

KW - Conditioning

KW - Child Behavior

KW - Young Children

KW - MALES

KW - Reinforcement

KW - Stimuli

KW - Observation

KW - Intervals

KW - Autism

RP - NOT IN FILE

SP - 62

EP - 80

JF - Journal of Early and Intensive Behavior Intervention

VL - 3

IS - 1

PB - Joseph Cautilli, Ph.D. & The Behavior Analyst Online Organization. 535 Queen Street, Philadelphia, PA 19147-3220.

N2 - In 2 multiple baseline experiments, we tested stimulus-stimulus pairing effects on acquisition of conditioned reinforcement for observing and manipulating stimuli and stereotypy/passivity. In Experiment 1 we studied a 5 year-old male with autism and we collected data using continuous 5-sec whole interval recording in 5 min sessions in which the student emitted appropriate play, and partial intervals of stereotypy, or passivity. Experiment 2 tested the effects of same procedure on independent work by 2 male participants with autism. The dependent variables were: intervals in which students worked independently, percentage of correct responses, and worksheet completion. Results from both experiments showed significant increases in numbers of intervals students emitted the target behaviors and decreases in stereotypy and passivity. (Contains 5 tables and 6 figures.)

SN - 1554-4893, 1554-4893

UR - <http://search.proquest.com/docview/61857702?accountid=14701>

ER -

TY - JOUR

ID - 2122

T1 - Kevin: "I Gotta Get to the Market": The Development of Peer Relationships in Inclusive Early Childhood Settings

A1 - Kim, Sonja de Groot

Y1 - 2005/12//

- KW - ERIC  
 KW - Unsupervised Play Addition  
 KW - ERIC,Current Index to Journals in Education (CIJE)  
 KW - Early Childhood Education  
 KW - Inclusive Schools  
 KW - Young Children  
 KW - Dramatic Play  
 KW - Social Adjustment  
 KW - Mainstreaming  
 KW - Physical Development  
 KW - Peer Relationship  
 KW - Friendship  
 KW - Verbal Communication  
 KW - Nonverbal Communication  
 KW - Paraprofessional School Personnel  
 KW - Physical Disabilities  
 RP - NOT IN FILE  
 SP - 163  
 EP - 169  
 JF - Early Childhood Education Journal  
 VL - 33  
 IS - 3  
 PB - Springer. 233 Spring Street, New York, NY 10013.  
 N2 - This study describes the lived experience of Kevin, a young child with physical disabilities who is placed in an inclusive classroom, a classroom where children with and without disabilities are educated together, with extra support provided for the child with disabilities. Children with disabilities who are placed in inclusive early childhood settings tend to be rejected or neglected more than their typically developing peers and are involved more with the adults in the classroom than with their peers. Kevin's experiences are framed in the context of the current emphasis on inclusive practices. The study documents that adult assistance and curriculum activities both play an important role in either facilitating or constraining social interaction with peers. When the assigned assistant functions as the child's playmate and mostly chooses table activities, both of these seem to limit opportunities for social interaction with peers. This study also documents that, without the assistant present, the child makes independent choices such as where and with whom to play. The dramatic play area serves as a conduit for meaningful verbal and nonverbal communication with peers. At the same time, Kevin's strong desire to play in this area seems to be the impetus for physical development--he walks alone for the very first time. Suggestions are given for teacher facilitation of dramatic play  
 SN - 1082-3301, 1082-3301  
 UR - <http://search.proquest.com/docview/62090674?accountid=14701>  
 L2 - [http://sfx.scholarsportal.info/ottawa?url\\_ver=Z39.88-2004&rft\\_val\\_fmt=info:ofi/fmt:kev:mtx:journal&genre=article&sid=ProQ:ProQ%3Aericshell&atitle=Kevin%3A+%22I+Gotta+Get+to+the+Market%22%3A+The+Development+of+Peer+Relationships+in+Inclusive+Early+Childhood+Settings&title=Early+Childhood+Education+Journal&issn=10823301&date=2005-12-01&volume=33&issue=3&spage=163&au=Kim%2C+Sonja+de+Groot&isbn=&jtitle=Early+Childhood+Education+Journal&bttitle=&rft\\_id=info:eric/EJ747223](http://sfx.scholarsportal.info/ottawa?url_ver=Z39.88-2004&rft_val_fmt=info:ofi/fmt:kev:mtx:journal&genre=article&sid=ProQ:ProQ%3Aericshell&atitle=Kevin%3A+%22I+Gotta+Get+to+the+Market%22%3A+The+Development+of+Peer+Relationships+in+Inclusive+Early+Childhood+Settings&title=Early+Childhood+Education+Journal&issn=10823301&date=2005-12-01&volume=33&issue=3&spage=163&au=Kim%2C+Sonja+de+Groot&isbn=&jtitle=Early+Childhood+Education+Journal&bttitle=&rft_id=info:eric/EJ747223)  
 ER -  
 TY - RPRT  
 ID - 2123  
 T1 - Behavioral and Social Effects of Inclusion at the Preschool Level: Exploring an Integrated Early Childhood Classroom  
 A1 - Brennan,Heather R.  
 Y1 - 2005/07//  
 N1 - Last updated - 2012-12-14  
 KW - ERIC  
 KW - Unsupervised Play Addition  
 KW - ERIC,Resources in Education (RIE)

KW - Preschool Education  
 KW - Inclusive Schools  
 KW - Play  
 KW - Young Children  
 KW - Mainstreaming  
 KW - Early Childhood Education  
 KW - Educational History  
 KW - Skill Development  
 KW - Regular and Special Education Relationship  
 KW - Peer Relationship  
 KW - Disabilities  
 KW - Social Development  
 KW - Student Behavior  
 KW - Modeling (Psychology)  
 RP - NOT IN FILE  
 SP - 49

N2 - The move to a more integrated setting for preschool classrooms has become a primary choice in the education of young children. The current research suggests that inclusion at the preschool level has a social impact on the behaviors of young children. Studies examining child play preference and attitudes towards children with disabilities have encouraged more research on inclusive preschool classrooms from a social development perspective. This study focuses on the types of behaviors and and social play initiated by general education students in an integrated preschool setting. The setting for this study is a inclusive classroom where the day is divided between inclusion and independent class time. An analysis of data collected through observations in a preschool classroom indicated that those behaviors initiated by general education students were typically cooperative in nature with a higher frequency of modeling behavior occurring during those interactions initiated by a general education student towards a classmate with special needs. This research project is the first stage in an avenue of research focusing on the field of early childhood inclusion and the effects of environment on student social development. Appended are: (1) Parental Assent Form; (2) Social and Behavioral Interactions Preschool Inclusive Classroom Observation Log; (3) Survey on Preschool Inclusion; and (4) Data Analysis-Tally Sheet/Frequency of Behaviors. (Contains 2 tables.) [M.S. Capstone Project, Keuka College.]

UR - <http://search.proquest.com/docview/62082546?accountid=14701>

ER -

TY - JOUR

ID - 2124

T1 - Peer-Mediated Treatment of Socially Withdrawn Maltreated Preschool Children: Cultivating Natural Community Resources

A1 - Fantuzzo, John

A1 - Manz, Patricia

A1 - Atkins, Marc

A1 - Meyers, Raymond

Y1 - 2005/05/01/

KW - ERIC

KW - Unsupervised Play Addition

KW - ERIC, Current Index to Journals in Education (CIJE)

KW - Early Childhood Education

KW - Peer Mediation

KW - Program Effectiveness

KW - Play

KW - Classroom Environment

KW - Community Resources

KW - Withdrawal (Psychology)

KW - Disadvantaged Youth

KW - Intervention

KW - Preschool Children

RP - NOT IN FILE

SP - 320

EP - 325

JF - Journal of Clinical Child and Adolescent Psychology

VL - 34

IS - 2

PB - Lawrence Erlbaum Associates, , Journal Subscription Department, 10 Industrial Avenue, Mahwah, NJ 07430-2262.

N2 - This study evaluated the effectiveness of Resilient Peer Treatment (RPT). This is a peer-mediated, classroom-based intervention for socially withdrawn, maltreated preschool children. It examined whether the RPT impact generalized from the treatment setting to larger classroom context. Eighty-two maltreated and nonmaltreated, socially withdrawn Head Start children were randomly assigned to either RPT or attention-control (AC) conditions. Data were collected by teachers and independent observers blind to both maltreatment status and treatment condition. Treatment resulted in higher levels of collaborative peer play interactions in the treatment setting posttreatment for both the maltreated and nonmaltreated children. Results documented generalization of the treatment impact to classroom free-play sessions. These findings were supported by teacher ratings of interactive peer play and social skills

SN - 1537-4416, 1537-4416

UR - <http://search.proquest.com/docview/62140615?accountid=14701>

L2 - [http://sfx.scholarsportal.info/ottawa?url\\_ver=Z39.88-](http://sfx.scholarsportal.info/ottawa?url_ver=Z39.88-)

2004&rft\_val\_fmt=info:ofi/fmt:kev:mtx:journal&genre=article&sid=ProQ:ProQ%3Aericshell&atitle=Peer-Mediated+Treatment+of+Socially+Withdrawn+Maltreated+Preschool+Children%3A+Cultivating+Natural+Community+Resources&title=Journal+of+Clinical+Child+and+Adolescent+Psychology&issn=15374416&date=2005-05-

01&volume=34&issue=2&spage=320&au=Fantuzzo%2C+John%3BManz%2C+Patricia%3BAtkins%2C+Marc%3BMeyers%2C+Raymond&isbn=&jtitle=Journal+of+Clinical+Child+and+Adolescent+Psychology&bttitle=&rft\_id=info:eric/EJ684201

ER -

TY - JOUR

ID - 2125

T1 - Dramatic Playing beyond the Theory of Multiple Intelligences

A1 - Guss,Faith Gabrielle

Y1 - 2005/02/01/

KW - ERIC

KW - Unsupervised Play Addition

KW - ERIC,Current Index to Journals in Education (CIJE)

KW - social life

KW - Play

KW - Dramatic Play

KW - Child Development

KW - Preschool Children

KW - Multiple Intelligences

KW - Developmental Psychology

RP - NOT IN FILE

SP - 43

EP - 54

JF - Research in Drama Education

VL - 10

IS - 1

PB - Customer Services for Taylor & Francis Group Journals, 325 Chestnut Street, Suite 800, Philadelphia, PA 19106.

N2 - Related to aspects of drama and theatre education, I search beyond the findings about symbolic play set forth by Dr Howard Gardner in "Frames of mind. The theory of multiple intelligences". Despite the inspiration for and solidarity with arts educators that emanate from his theory, I sensed that it did not provide a full picture of the complex aesthetic and reflective skills manifested by young children in their playing. I refer to symbolic

play as "play-drama", viewing it as autonomous drama performed in the socio-cultural context of children's collective playing. The individual child-orientation in Gardner's developmental psychology study does not address the child-cultural dimension. Yet there is much to be learned for arts educators about the significance for the children of their cultural-aesthetic ways of being together. At the conclusion of the research, I view the capacity for expert dramatic playing as an executive capacity, a dramatic intelligence, which coordinates the deployment of the multiple artistic symbols that constitute play-drama. Children's skills go beyond what Gardner proposes as interpersonal and intrapersonal. The skills can be compared with those of a first-draft auteur, who masters the artistic positions and form-languages of a dramatist, dramaturg, director, actor, dancer/choreographer, storyteller, musician/composer, scenographer, props person, light designer and sound designer. In their aesthetic social life, play-ensembles enter and exit the drama-cultural mode on and off throughout the long hours in day-care

SN - 1356-9783, 1356-9783

UR - <http://search.proquest.com/docview/61831420?accountid=14701>

L2 - [http://sfx.scholarsportal.info/ottawa?url\\_ver=Z39.88-](http://sfx.scholarsportal.info/ottawa?url_ver=Z39.88-)

2004&rft\_val\_fmt=info:ofi/fmt:kev:mtx:journal&genre=article&sid=ProQ:ProQ%3Aericshell&atitle=Dramatic+Playing+beyond+the+Theory+of+Multiple+Intelligences&title=Research+in+Drama+Education&issn=13569783&date=2005-02-

01&volume=10&issue=1&spage=43&au=Guss%2C+Faith+Gabrielle&isbn=&jtitle=Research+in+Drama+Education&bttitle=&rft\_id=info:eric/EJ691398

ER -

TY - JOUR

ID - 2126

T1 - Inquiry-Based Environments for the Inclusion of Students With Exceptional Learning Needs

A1 - Rapp, Whitney H.

Y1 - 2005///

KW - ERIC

KW - Unsupervised Play Addition

KW - ERIC, Current Index to Journals in Education (CIJE)

KW - Play

KW - Educational Environment

KW - Inclusive Schools

KW - Scaffolding (Teaching Technique)

KW - Independent Study

KW - Special Needs Students

KW - Parent School Relationship

KW - Museums

KW - Parent Participation

KW - Teaching Methods

KW - Inquiry

RP - NOT IN FILE

SP - 296

EP - 310

JF - Remedial & Special Education

VL - 26

IS - 5

PB - PRO-ED, , 8700 Shoal Creek Boulevard, Austin, TX 78757-6897.

N2 - A qualitative study of children's museums' successful inquiry-based learning environments is described, focusing on four students with various exceptional learning needs. Benefits for the students in terms of scaffolded instruction, meaningful and contextualized activities, self-regulated learning, the establishment of learning communities, play, and parental involvement are noted. A discussion of the generalization of learning to the classroom and of positive attitudes and children's museums as inclusive, supplemental environments is included. Implications for future practice involve school-museum partnerships and individualized programming for all learners

SN - 0741-9325, 0741-9325

UR - <http://search.proquest.com/docview/62147792?accountid=14701>

L2 - [http://sfx.scholarsportal.info/ottawa?url\\_ver=Z39.88-2004&rft\\_val\\_fmt=info:ofi/fmt:kev:mtx:journal&genre=article&sid=ProQ:ProQ%3Aericshell&atitle=Inquiry-Based+Environments+for+the+Inclusion+of+Students+With+Exceptional+Learning+Needs&title=Remedial+%26+Special+Education&issn=07419325&date=2005-01-01&volume=26&issue=5&spage=296&au=Rapp%2C+Whitney+H.&isbn=&jtitle=Remedial+%26+Special+Education&bttitle=&rft\\_id=info:eric/EJ722324](http://sfx.scholarsportal.info/ottawa?url_ver=Z39.88-2004&rft_val_fmt=info:ofi/fmt:kev:mtx:journal&genre=article&sid=ProQ:ProQ%3Aericshell&atitle=Inquiry-Based+Environments+for+the+Inclusion+of+Students+With+Exceptional+Learning+Needs&title=Remedial+%26+Special+Education&issn=07419325&date=2005-01-01&volume=26&issue=5&spage=296&au=Rapp%2C+Whitney+H.&isbn=&jtitle=Remedial+%26+Special+Education&bttitle=&rft_id=info:eric/EJ722324)  
ER -

TY - JOUR

ID - 2127

T1 - Walking and Eating Behavior of Toddlers at 12 Months Old

A1 - Koda,Naoko

A1 - Akimoto,Yuko

A1 - Hirose,Toshiya

A1 - Hinobayashi,Toshihiko

A1 - Minami,Tetsuhiro

Y1 - 2004/12//

KW - ERIC

KW - Unsupervised Play Addition

KW - ERIC,Current Index to Journals in Education (CIJE)

KW - Early Childhood Education

KW - Eating Habits

KW - Physical Activities

KW - Toddlers

KW - Play

KW - Foreign Countries

KW - Gender Differences

KW - Nursery Schools

RP - NOT IN FILE

SP - 9

JF - Early Child Development and Care

VL - 174

IS - 7

PB - Customer Services for Taylor & Francis Group Journals, 325 Chestnut Street, Suite 800, Philadelphia, PA 19106.

N2 - Locomotive and eating behavior of 52 toddlers was observed at 12 months old in a nursery school and investigated in relation to the acquisition of independent walking. The toddlers who acquired walking ate more by themselves using the hands than the toddlers who did not start walking. This suggested that acquisition of walking was associated with eating behavior. However, onset of walking did not immediately influence the toddlers' interest in other persons or skilful ability to use tools. Sex differences in the toddlers' behavior were minor, but the teachers showed sex bias to the toddlers' behavior

SN - 0300-4430, 0300-4430

UR - <http://search.proquest.com/docview/62126120?accountid=14701>

L2 - [http://sfx.scholarsportal.info/ottawa?url\\_ver=Z39.88-2004&rft\\_val\\_fmt=info:ofi/fmt:kev:mtx:journal&genre=article&sid=ProQ:ProQ%3Aericshell&atitle=Walking+and+Eating+Behavior+of+Toddlers+at+12+Months+Old&title=Early+Child+Development+and+Care&issn=03004430&date=2004-12-01&volume=174&issue=7&spage=9&au=Koda%2C+Naoko%3BAkimoto%2C+Yuko%3BHirose%2C+Toshiya%3BHinobayashi%2C+Toshihiko%3BMinami%2C+Tetsuhiro&isbn=&jtitle=Early+Child+Development+and+Care&bttitle=&rft\\_id=info:eric/EJ681509](http://sfx.scholarsportal.info/ottawa?url_ver=Z39.88-2004&rft_val_fmt=info:ofi/fmt:kev:mtx:journal&genre=article&sid=ProQ:ProQ%3Aericshell&atitle=Walking+and+Eating+Behavior+of+Toddlers+at+12+Months+Old&title=Early+Child+Development+and+Care&issn=03004430&date=2004-12-01&volume=174&issue=7&spage=9&au=Koda%2C+Naoko%3BAkimoto%2C+Yuko%3BHirose%2C+Toshiya%3BHinobayashi%2C+Toshihiko%3BMinami%2C+Tetsuhiro&isbn=&jtitle=Early+Child+Development+and+Care&bttitle=&rft_id=info:eric/EJ681509)  
ER -

TY - JOUR

ID - 2128

T1 - Psychometric Properties of the STAT for Early Autism Screening

A1 - Stone,Wendy L.

- A1 - Coonrod, Elaine E.  
A1 - Turner, Lauren M.  
A1 - Pozdol, Stacie L.  
Y1 - 2004/12//  
KW - ERIC  
KW - Unsupervised Play Addition  
KW - ERIC, Current Index to Journals in Education (CIJE)  
KW - Verbal Communication  
KW - Measures (Individuals)  
KW - Play  
KW - Young Children  
KW - Imitation  
KW - Diagnostic Tests  
KW - Interrater Reliability  
KW - Autism  
KW - Psychometrics  
KW - Screening Tests  
RP - NOT IN FILE  
SP - 691  
EP - 701  
JF - Journal of Autism and Developmental Disorders  
VL - 34  
IS - 6  
PB - Springer. 233 Spring Street, New York, NY 10013.  
N2 - The STAT is an interactive screening measure for autism that assesses behaviors in the areas of play, communication, and imitation skills. In Study 1, signal detection procedures were employed to identify a cutoff score for the STAT using developmentally matched groups of 2-year-old children with autism and with nonspectrum disorders. The resulting cutoff yielded high sensitivity, specificity, and predictive values for the development sample as well as for an independent validation sample. Study 2 examined psychometric properties of the STAT and revealed acceptable levels of interrater agreement, test-retest reliability, and agreement between STAT risk category and ADOS-G classification. The STAT demonstrates strong psychometric properties and shows promising utility as a Level 2 screening measure for autism  
SN - 0162-3257, 0162-3257  
UR - <http://search.proquest.com/docview/62075385?accountid=14701>  
L2 - [http://sfx.scholarsportal.info/ottawa?url\\_ver=Z39.88-2004&rft\\_val\\_fmt=info:ofi/fmt:kev:mtx:journal&genre=article&sid=ProQ:ProQ%3Aericshell&atitle=Psychometric+Properties+of+the+STAT+for+Early+Autism+Screening&title=Journal+of+Autism+and+Developmental+Disorders&issn=01623257&date=2004-12-01&volume=34&issue=6&spage=691&au=Stone%2C+Wendy+L.%3BCoonrod%2C+Elaine+E.%3BTurner%2C+Lauren+M.%3BPozdol%2C+Stacie+L.&isbn=&jtitle=Journal+of+Autism+and+Developmental+Disorders&bttitle=&rft\\_id=info:eric/EJ735531](http://sfx.scholarsportal.info/ottawa?url_ver=Z39.88-2004&rft_val_fmt=info:ofi/fmt:kev:mtx:journal&genre=article&sid=ProQ:ProQ%3Aericshell&atitle=Psychometric+Properties+of+the+STAT+for+Early+Autism+Screening&title=Journal+of+Autism+and+Developmental+Disorders&issn=01623257&date=2004-12-01&volume=34&issue=6&spage=691&au=Stone%2C+Wendy+L.%3BCoonrod%2C+Elaine+E.%3BTurner%2C+Lauren+M.%3BPozdol%2C+Stacie+L.&isbn=&jtitle=Journal+of+Autism+and+Developmental+Disorders&bttitle=&rft_id=info:eric/EJ735531)  
ER -
- TY - JOUR  
ID - 2130  
T1 - The Effects of the Webster-Stratton Parenting Program on Maltreating Families: Fostering Strengths  
A1 - Hughes, J.R.  
A1 - Gottlieb, L.N.  
Y1 - 2004/10//  
KW - ERIC  
KW - Unsupervised Play Addition  
KW - ERIC, Current Index to Journals in Education (CIJE)  
KW - Parent Education  
KW - Parenting Skills  
KW - Control Groups  
KW - Play

KW - Home Visits

KW - Mothers

KW - Child Rearing

RP - NOT IN FILE

SP - 1081

EP - 1097

JF - Child Abuse and Neglect: The International Journal

VL - 28

IS - 10

PB - Elsevier Customer Service Department, 6277 Sea Harbor Drive, Orlando, FL 32887-4800.

N2 - Objective:: This study examined the effects of the Webster-Stratton parenting program on the parenting skills of maltreating mothers and on the autonomy of their children (3-8 years). Method:: A randomized controlled trial was used. Twenty-six maltreating families were randomly assigned to one of two conditions: the 16-hour weekly intervention group, or the 4-month wait list control group. Pre- and post-intervention independent assessments included a 2-hour home visit involving videotaped mother-child interactions during two prescribed, 10-minute play activities. Results:: Compared to the control group, treatment mothers demonstrated significant improvement in involvement and marginally significant improvement in autonomy-support, but no improvement in structure. Treatment group children showed no significant improvement in autonomy when compared to control group children. Conclusions:: This parenting program proved effective with maltreating parents. The lack of demonstrated effect on children may reflect the need for a larger and more sustained treatment dose and/or the need to include parent-child interaction opportunities in the program. At the same time, while treatment gains were limited to the parent, the high treatment adherence rate (92% attended six or more of the eight program sessions) and low attrition rate (n=1) indicate that the treatment gains may hold potential for more thorough examination

SN - 0145-2134, 0145-2134

UR - <http://search.proquest.com/docview/62123793?accountid=14701>

L2 - [http://sfx.scholarsportal.info/ottawa?url\\_ver=Z39.88-](http://sfx.scholarsportal.info/ottawa?url_ver=Z39.88-)

2004&rft\_val\_fmt=info:ofi/fmt:kev:mtx:journal&genre=article&sid=ProQ:ProQ%3Aericshell&atitle=The+Effects+of+the+Webster-

Stratton+Parenting+Program+on+Maltreating+Families%3A+Fostering+Strengths&title=Child+Abuse+and+Neglect%3A+The+International+Journal&issn=01452134&date=2004-10-

01&volume=28&issue=10&spage=1081&au=Hughes%2C+J.R.%3BGottlieb%2C+L.N.&isbn=&jtitle=Child+

Abuse+and+Neglect%3A+The+International+Journal&bttitle=&rft\_id=info:eric/EJ698085

ER -

TY - JOUR

ID - 2131

T1 - "Flexible Control": Towards a Conception of Personal Autonomy for Postmodern Education

A1 - Aviram,Roni

A1 - Yonah,Yossi

Y1 - 2004/02//

KW - ERIC

KW - Unsupervised Play Addition

KW - ERIC,Current Index to Journals in Education (CIJE)

KW - Play

KW - Postmodernism

KW - Educational Objectives

KW - Games

KW - Democracy

KW - Personal Autonomy

KW - Self Control

KW - Instructional Design

KW - Educational Philosophy

RP - NOT IN FILE

SP - 3

EP - 17



JF - Educational Philosophy and Theory

VL - 36

IS - 1

PB - Wiley-Blackwell, 350 Main Street, Malden, MA 02148.

N2 - This article offers a way to salvage the ideal of the autonomous person from the predicament besetting it and to reclaim it as a worthy and respectable ideal. Carefully maneuvering around this ideal, jettisoning its obsolete qualities while reaffirming its sound ones, the authors offer outlines for a conception of personal autonomy suitable for postmodern democratic education. A key concept which is introduced and developed in this article is that of "flexible control". The authors show that this concept can assist in avoiding the pitfalls encumbering the traditional concept of personal autonomy, while allowing to salvage its propitious aspects for use in postmodern democratic education. This concept has three main features: (1) it recognizes the capacity of the agent to exercise different levels of control; (2) these levels do not indicate distinct and closed phases, but are placed on a continuous temporal axis; and (3) the agent may shift from a minimal level of control, or from absence of control, to a maximal level of control, as the circumstances may decree. The authors argue that when the necessary qualifications are made, the ideal of the autonomous person and the idea of self-control associated with it can, firstly, accommodate the previously mentioned and well-grounded concerns, and secondly, be unproblematically adopted as a legitimate goal of education. (Contains 1 table and 8 notes.)

SN - 0013-1857, 0013-1857

UR - <http://search.proquest.com/docview/1140145711?accountid=14701>

L2 - [http://sfx.scholarsportal.info/ottawa?url\\_ver=Z39.88-](http://sfx.scholarsportal.info/ottawa?url_ver=Z39.88-)

2004&rft\_val\_fmt=info:ofi/fmt:kev:mtx:journal&genre=article&sid=ProQ:ProQ%3Aericshell&atitle=%22Flexible+Control%22%3A+Towards+a+Conception+of+Personal+Autonomy+for+Postmodern+Education&title=Educational+Philosophy+and+Theory&issn=00131857&date=2004-02-

01&volume=36&issue=1&spage=3&au=Aviram%2C+Roni%3BYonah%2C+Yossi&isbn=&jtitle=Educational+Philosophy+and+Theory&bttitle=&rft\_id=info:eric/EJ980314

ER -

TY - BOOK

ID - 2132

T1 - Environmental Print in the Classroom: Meaningful Connections for Learning to Read

A1 - Prior, Jennifer

A1 - Gerard, Maureen R.

Y1 - 2004///

N1 - Last updated - 2012-12-14

KW - ERIC

KW - Unsupervised Play Addition

KW - ERIC, Resources in Education (RIE)

KW - Kindergarten

KW - Curriculum Development

KW - Play

KW - Reading Instruction

KW - Educational Games

KW - Child Development

KW - Emergent Literacy

KW - Relevance (Education)

KW - Early Childhood Education

KW - Student Evaluation

KW - Media Specialists

KW - Literacy Education

RP - NOT IN FILE

SP - 144

PB - International Reading Association, Headquarters Office, 800 Barksdale Rd., P.O. Box 8139, Newark, DE 19714-8139.

N2 - Find out how environmental print can be used as an instructional literacy tool in the kindergarten classroom. This book: (1) Describes games, activities, and centers that use environmental print; (2) Shows how to use environmental print to create a curriculum and assess students print awareness and sight word vocabulary;

and (3) Gives recommendations for helping parents assist their children in learning to read using environmental print. Although kindergarten students are the focus of the book, ideas for preschoolers and for more advanced learners can also be found. Following a foreword, the following chapters are included: (1) "Early Literacy Development and Environmental Print: Making the Connection"; (2) "Play and Environmental Print in the Early Years"; (3) "Implementing an Environmental Print Curriculum"; (4) "Games and Activities for Independent Use"; (5) "Assessment and Evaluation: Documenting Development"; and (6) "Getting Started: Recommendations for Teachers and Parents"; Appended are: (1) "Description of Authors' Studies"; and (2) "Survey and Survey Results", followed by references and an index

SN - 0872075532

UR - <http://search.proquest.com/docview/62115544?accountid=14701>

L2 - [http://sfx.scholarsportal.info/ottawa?url\\_ver=Z39.88-](http://sfx.scholarsportal.info/ottawa?url_ver=Z39.88-)

2004&rft\_val\_fmt=info:ofi/fmt:kev:mtx:book&genre=book&sid=ProQ:ERIC&atitle=&title=Environmental+Print+in+the+Classroom%3A+Meaningful+Connections+for+Learning+to+Read&issn=&date=2004-01-01&volume=&issue=&spage=144&au=Prior%2C+Jennifer%3BGerard%2C+Maureen+R.&isbn=0872075532&jtitle=&bttitle=Environmental+Print+in+the+Classroom%3A+Meaningful+Connections+for+Learning+to+Read&rft\_id=info:eric/ED488977

ER -

TY - BOOK

ID - 2133

T1 - Teaching and Learning in Preschool: Using Individually Appropriate Practices in Early Childhood Literacy Instruction

A1 - Venn,Elizabeth Claire

A1 - Jahn,Monica Dacy

Y1 - 2004///

N1 - Availability - Level 2 - Produced in microfiche (1966-2003)

Last updated - 2012-12-14

KW - ERIC

KW - Unsupervised Play Addition

KW - Risk Taking

KW - Transitional Activities

KW - Vygotsky (Lev S)

KW - Zone of Proximal Development

KW - ERIC,Resources in Education (RIE)

KW - Practitioners

KW - Teachers

KW - Preschool Education

KW - Performance Based Assessment

KW - Teacher Student Relationship

KW - Play

KW - Individualized Instruction

KW - Integrated Curriculum

KW - Individual Needs

KW - Student Centered Curriculum

KW - Classroom Techniques

KW - Models

KW - Preschool Curriculum

KW - Reading Instruction

KW - Individual Differences

KW - Bibliographies

KW - Parent School Relationship

KW - Developmentally Appropriate Practices

KW - Emergent Literacy

KW - Learning Activities

KW - Student Educational Objectives

KW - Educational Quality

RP - NOT IN FILE

SP - 336

PB - International Reading Association, Order Department, P.O. Box 6021, Newark, DE 19714-6021 (\$30.95).

N2 - This book presents a preschool framework that integrates literacy activities into content area lessons while embedding instruction within adult-child social interactions and realistic, playful activities tailored to each child's individual needs. Chapter 1 of the book delineates the theory and rationale behind the framework, and outlines essential preschool components. Chapter 2 discusses three critical teacher competencies necessary for quality preschool instruction. Chapter 3 outlines a variety of formal and informal assessments and curriculum outcomes as they relate to lesson design and instruction. Chapter 4 addresses children's social and emotional development and includes information on classroom management, self-regulation, risk taking, and dramatic play. Chapter 5 discusses the critical role of oral language development and phonological awareness in early literacy. Chapter 6 explores the different reading components of shared reading, read-alouds, grouping students based on zone of proximal development (ZPD), independent reading, print concepts, and listening comprehension. Chapter 7 focuses on the vital areas of early writing, including language experience and shared, scaffolded, ZPD, and independent writing. The central theme of Chapter 8 is learning about print, including letter knowledge and sound-symbol correspondence. Chapter 9 describes the content areas of mathematics, social studies, and science, and highlights the importance of free exploration, discovery time, literacy links, and thematic integration. Chapter 10 describes music, movement, and the creative arts as they relate to literacy. Chapter 11 covers gross and fine motor development and health and safety topics. Chapter 12 presents information about transitioning families comfortably from the home to the school culture. The book concludes with recommendations for improving early childhood preservice and inservice teacher education. Six appendices supplement the text with lesson plans, outco

SN - 0872075354

UR - <http://search.proquest.com/docview/62184682?accountid=14701>

L2 - [http://sfx.scholarsportal.info/ottawa?url\\_ver=Z39.88-](http://sfx.scholarsportal.info/ottawa?url_ver=Z39.88-)

2004&rft\_val\_fmt=info:ofi/fmt:kev:mtx:book&genre=book&sid=ProQ:ERIC&atitle=&title=Teaching+and+Le  
arning+in+Preschool%3A+Using+Individually+Appropriate+Practices+in+Early+Childhood+Literacy+Instructi  
on.&issn=&date=2004-01-

01&volume=&issue=&spage=336&au=Venn%2C+Elizabeth+Claire%3BJahn%2C+Monica+Dacy&isbn=0872  
075354&jtitle=&bttitle=Teaching+and+Learning+in+Preschool%3A+Using+Individually+Appropriate+Practice  
s+in+Early+Childhood+Literacy+Instruction.&rft\_id=info:eric/ED481894

ER -

TY - JOUR

ID - 2134

T1 - Predicting Language Outcome in Infants with Autism and Pervasive Developmental Disorder

A1 - Charman,Tony

A1 - Baron-Cohen,Simon

A1 - Swettenham,John

A1 - Baird,Gillian

A1 - Drew,Auriol

A1 - Cox,Antony

Y1 - 2003/07//

KW - ERIC

KW - Unsupervised Play Addition

KW - ERIC,Current Index to Journals in Education (CIJE)

KW - Prediction

KW - Toddlers

KW - Language Acquisition

KW - Play

KW - Imitation

KW - Clinical Diagnosis

KW - Language Skills

KW - Pervasive Developmental Disorders

KW - Correlation

KW - Longitudinal Studies

- KW - Intelligence Quotient  
 KW - Individual Differences  
 KW - Interpersonal Communication  
 KW - Preschool Children  
 KW - Autism  
 KW - Attention  
 KW - Infants  
 RP - NOT IN FILE  
 SP - 265  
 EP - 285  
 JF - International Journal of Language & Communication Disorders  
 VL - 38  
 IS - 3  
 PB - Taylor & Francis, 325 Chestnut Street Suite 800, Philadelphia, PA 19106.  
 N2 - Background: To examine longitudinal associations between diagnosis, joint attention, play and imitation abilities and language outcome in infants with autism and pervasive developmental disorder. Methods and Procedures: Experimental measures of joint attention, play and imitation were conducted with a sample of infants with autism spectrum disorder at age 20 months. Language outcome was assessed at age 42 months. A within-group longitudinal correlational design was adopted. Outcomes and Results: Language at 42 months was higher for children with a diagnosis of pervasive developmental disorder than for children with a diagnosis of autism. Language at follow-up was also positively associated with performance on experimental measures of joint attention and imitation, but not with performance on experimental measures of play and "goal detection" at 20 months, nor with a non-verbal intelligence quotient, although these associations were not examined independent of diagnosis. However, floor effects on the measure of play at 20 months and the small sample size limit the conclusions that can be drawn. Conclusions: Individual differences in infant social-communication abilities as well as diagnosis may predict language outcome in preschoolers with autism spectrum disorders. Attention should be directed at assessing these skills in 2- and 3-year-old children referred for a diagnosis of autism spectrum disorder. Imitation and joint attention abilities may be important targets for early intervention. (Contains 2 tables and 2 figures.)  
 SN - 1368-2822, 1368-2822  
 UR - <http://search.proquest.com/docview/61990055?accountid=14701>  
 L2 - [http://sfx.scholarsportal.info/ottawa?url\\_ver=Z39.88-2004&rft\\_val\\_fmt=info:ofi/fmt:kev:mtx:journal&genre=article&sid=ProQ:ProQ%3Aericshell&atitle=Predicting+Language+Outcome+in+Infants+with+Autism+and+Pervasive+Developmental+Disorder&title=International+Journal+of+Language+%26+Communication+Disorders&issn=13682822&date=2003-07-01&volume=38&issue=3&spage=265&au=Charman%2C+Tony%3BBaron-Cohen%2C+Simon%3BSwettenham%2C+John%3BBaird%2C+Gillian%3BDrew%2C+Auriol%3BCox%2C+Antony&isbn=&jtitle=International+Journal+of+Language+%26+Communication+Disorders&btitle=&rft\\_id=info:eric/EJ770321](http://sfx.scholarsportal.info/ottawa?url_ver=Z39.88-2004&rft_val_fmt=info:ofi/fmt:kev:mtx:journal&genre=article&sid=ProQ:ProQ%3Aericshell&atitle=Predicting+Language+Outcome+in+Infants+with+Autism+and+Pervasive+Developmental+Disorder&title=International+Journal+of+Language+%26+Communication+Disorders&issn=13682822&date=2003-07-01&volume=38&issue=3&spage=265&au=Charman%2C+Tony%3BBaron-Cohen%2C+Simon%3BSwettenham%2C+John%3BBaird%2C+Gillian%3BDrew%2C+Auriol%3BCox%2C+Antony&isbn=&jtitle=International+Journal+of+Language+%26+Communication+Disorders&btitle=&rft_id=info:eric/EJ770321)  
 ER -  
 TY - GEN  
 ID - 2135  
 T1 - Strategies To Improve Perceived Competence in Children with Visual Impairments  
 A1 - Shapiro, Deborah R.  
 A1 - Lieberman, Lauren J.  
 A1 - Moffett, Aaron  
 Y1 - 2003///  
 N1 - Last updated - 2012-12-14  
 KW - ERIC  
 KW - Unsupervised Play Addition  
 KW - ERIC, Current Index to Journals in Education (CIJE)  
 KW - Practitioners  
 KW - Elementary Secondary Education  
 KW - Self Evaluation (Individuals)  
 KW - Athletics

KW - visual impairments

KW - Self Esteem

KW - Self Concept

KW - Interpersonal Competence

KW - Teaching Methods

RP - NOT IN FILE

SP - 69

EP - 80

JF - RE:view

VL - 35

IS - 2

N2 - This article suggests strategies to improve perceived competencies in children with visual impairments. Strategies to increase perceptions of athletic competence include introducing role models and using behavior assessments. Guided discovery and peer tutoring are suggested teaching techniques. Strategies to improve social competence include increasing independent mobility, facilitating social interaction during lunch, and teaching that initiative is part of empowerment. (Contains references.) (DB)

UR - <http://search.proquest.com/docview/62179325?accountid=14701>

L2 - [http://sfx.scholarsportal.info/ottawa?url\\_ver=Z39.88-](http://sfx.scholarsportal.info/ottawa?url_ver=Z39.88-)

2004&rft\_val\_fmt=info:ofi/fmt:kev:mtx:journal&genre=article&sid=ProQ:ProQ%3Aericshell&atitle=Strategies+To+Improve+Perceived+Competence+in+Children+with+Visual+Impairments.&title=RE%3Aview&issn=08991510&date=2003-01-

01&volume=35&issue=2&page=69&au=Shapiro%2C+Deborah+R.%3BLieberman%2C+Lauren+J.%3BMoffett%2C+Aaron&isbn=&jtitle=RE%3Aview&bttitle=&rft\_id=info:eric/EJ677087

ER -

TY - JOUR

ID - 2136

T1 - Caregiver and Peer Responses to Children with Language and Motor Disabilities in Inclusive Preschool Programs

A1 - Harper, Lawrence V.

A1 - McCluskey, Karen S.

Y1 - 2002///

KW - ERIC

KW - Unsupervised Play Addition

KW - ERIC, Current Index to Journals in Education (CIJE)

KW - Early Childhood Education

KW - Caregiver Child Relationship

KW - Comparative Analysis

KW - Teacher Student Relationship

KW - Play

KW - Inclusive Schools

KW - Special Needs Students

KW - Disabilities

KW - Social Behavior

KW - Preschool Children

KW - Peer Relationship

RP - NOT IN FILE

SP - 148

EP - 166

JF - Early Childhood Research Quarterly

VL - 17

IS - 2

N2 - Compared free-play social behaviors of preschoolers with special needs in two inclusive preschool programs with those of typically-developing classmates, matched by age and sex. Found that children with no/little productive language spent more time in solitary pursuits than others and seldom initiated interactions.

Children who were incapable of independent locomotion depended on adults for initiating activity changes and social exchanges. (Author/KB)  
 SN - 0885-2006, 0885-2006  
 UR - <http://search.proquest.com/docview/62209254?accountid=14701>  
 L2 - [http://sfx.scholarsportal.info/ottawa?url\\_ver=Z39.88-2004&rft\\_val\\_fmt=info:ofi/fmt:kev:mtx:journal&genre=article&sid=ProQ:ProQ%3Aericshell&atitle=Caregiver+and+Peer+Responses+to+Children+with+Language+and+Motor+Disabilities+in+Inclusive+Preschool+Programs.&title=Early+Childhood+Research+Quarterly&issn=08852006&date=2002-01-01&volume=17&issue=2&spage=148&au=Harper%2C+Lawrence+V.%3BMcCluskey%2C+Karen+S.&isbn=&jtitle=Early+Childhood+Research+Quarterly&btitle=&rft\\_id=info:eric/EJ654404](http://sfx.scholarsportal.info/ottawa?url_ver=Z39.88-2004&rft_val_fmt=info:ofi/fmt:kev:mtx:journal&genre=article&sid=ProQ:ProQ%3Aericshell&atitle=Caregiver+and+Peer+Responses+to+Children+with+Language+and+Motor+Disabilities+in+Inclusive+Preschool+Programs.&title=Early+Childhood+Research+Quarterly&issn=08852006&date=2002-01-01&volume=17&issue=2&spage=148&au=Harper%2C+Lawrence+V.%3BMcCluskey%2C+Karen+S.&isbn=&jtitle=Early+Childhood+Research+Quarterly&btitle=&rft_id=info:eric/EJ654404)  
 ER -

TY - RPRT

ID - 2137

T1 - Literacy Skills, Occupational Assignment and the Returns to Over- and Under-Education. International Adult Literacy Survey

A1 - Boothby, Daniel

Y1 - 2002/01//

N1 - Last updated - 2012-12-14

KW - ERIC

KW - Unsupervised Play Addition

KW - Canada

KW - General Educational Development Tests

KW - ERIC, Resources in Education (RIE)

KW - Adult Education

KW - Adult Literacy

KW - Statistics

KW - Play

KW - Literature

KW - MALES

KW - Academic Achievement

KW - SURVEYS

KW - Adults

KW - On the Job Training

KW - Outcomes of Education

KW - Evaluation Methods

KW - Foreign Countries

KW - Educational Development

KW - Vocational Education

KW - Females

KW - Labor Force Development

KW - Education Work Relationship

RP - NOT IN FILE

SP - 48

PB - Human Resources and Skills Development Canada. Service Canada, Ottawa, ON K1A 0J9, Canada.

N2 - This study uses data from the Canadian panel of the International Adult Literacy Survey to examine the relations between schooling, literacy and occupational assignment and to determine the extent to which returns to over- and under-education are in fact returns to literacy skills. Two measures of required training time for the job are used, both of which are based on detailed occupation. One is the General Educational Development (GED) level of the occupation; the other is the sum of the GED and Specific Vocational Preparation (SVP) times. Regression analysis of the required training time of individuals' jobs shows that literacy skills are an important determinant of occupational assignment by skill level, once schooling is taken into account. Skills acquired through on-the-job training may also play an important role in occupational assignment. The research literature on returns to over-education and under-education examines the relation between workers' skills, as measured by their level of schooling, and the skill requirements of their job. The "typical" findings in this body of research are 1) that over-educated workers (schooling greater than required by their job) earn more than

workers in jobs with comparable educational requirements but with the (lower) schooling levels that match these requirements; 2) that over-educated workers earn less than workers with comparable schooling in jobs which require this level of schooling; and 3) that under-educated workers (schooling less than required by their job) earn more than comparably educated workers in jobs which match their schooling, but less than workers in jobs with comparable educational requirements whose schooling matches these requirements. We find this pattern of returns to over-education and under-education for women and men in our sample using regression analysis of the (log of) earnings of full-time workers. When measures of literacy skill are added to these regressions, the estimated coefficients of both over-education and under-education decrease in absolute value for men and the estimated coefficients of under-education increase for women. When a measure of literacy use at work is added, this variable has a positive coefficient; and there are further decreases in the absolute values of the coefficients of both over- and under-education for both women and men. We conclude that literacy skills play a significant role in occupational assignment, independent of the role of schooling, that the return to under-education for both women and men is in large part a return to above average literacy skills for their level of schooling, and that for men, the return to over-education is in large part a return to literacy skills which are above average for their jobs. This would seem to indicate that employers are capable of determining their employees' literacy skills by more accurate means than simply depending on the level of schooling as an indicator of literacy skills. Appendices include: (1) Sample Restrictions and Effects on Sample Size; (2) Issues Concerning the Functional Form of the Earnings Equations; and (3) The Relation between Education, Literacy and Literacy Scores. (Contains 8 tables and 27 endnotes)

UR - <http://search.proquest.com/docview/881457159?accountid=14701>

ER -

TY - GEN

ID - 2138

T1 - Outdoor Experiences for Young Children. ERIC Digest

A1 - Rivkin, Mary S.

Y1 - 2000/12//

N1 - Availability - Level 1 - Available online, if indexed January 1993 onward

Last updated - 2012-12-14

KW - ERIC

KW - Unsupervised Play Addition

KW - ERIC Digests

KW - School Yards

KW - ERIC, Resources in Education (RIE)

KW - Early Childhood Education

KW - Primary Education

KW - Outdoor Activities

KW - Facility Requirements

KW - Play

KW - Young Children

KW - Playgrounds

KW - Experiential Learning

KW - Developmentally Appropriate Practices

KW - Child Development

RP - NOT IN FILE

SP - 4

PB - ERIC/CRESS, P.O. Box 1348, Charleston, WV 25325-1348; Tel: 800-624-9120 (Toll Free). Full text at Web site: <http://www.ael.org/eric/digests/edorc007.htm>.

N2 - This digest examines the value of outdoor experience for young children, reasons for its decline, ways to enhance school play spaces, and aspects of developmentally appropriate outdoor environments. Young children appear to benefit from being outdoors and especially need the broad experiential base provided by being outdoors. The richness and novelty of the outdoors stimulates brain development and function. The knowledge gained outdoors provides a foundation for literacy and science learning and can help children to learn to care for the environment. Nevertheless, children now spend most of their time indoors. Unsupervised outdoor play is rare for preschoolers and declining for primary-age children due to various adult fears about safety; the lack of suitable places to play, especially in urban areas; and such indoor attractions as television and computers.

Improvements to school yard design and maintenance can allow the use of the outdoor environment to enhance curriculum, demonstrate the value of stewardship to young children, offer opportunities for student projects, create habitats for birds and other creatures, and increase the use of school grounds by teachers and students. Suggestions are offered for designing developmentally appropriate outdoor play spaces for infants, toddlers, preschoolers, and primary children. (Contains 24 references.) (SV)

UR - <http://search.proquest.com/docview/62348703?accountid=14701>

ER -

TY - RPRT

ID - 2139

T1 - Assistive Technology Training for Early Childhood Personnel. Final Report

Y1 - 2000///

N1 - Availability - Level 1 - Available online, if indexed January 1993 onward

SuppNotes - Project period: 8/1/94 through 7/31/00

Last updated - 2012-12-14

KW - ERIC

KW - Unsupervised Play Addition

KW - ERIC,Resources in Education (RIE)

KW - Early Childhood Education

KW - Play

KW - Theory Practice Relationship

KW - On the Job Training

KW - Assistive Devices (for Disabled)

KW - Staff Development

KW - Computer Uses in Education

KW - Participant Satisfaction

KW - Inservice Teacher Education

KW - Disabilities

KW - Change Strategies

KW - Interdisciplinary Approach

KW - Augmentative and Alternative Communication

KW - Technical Assistance

KW - Technology

RP - NOT IN FILE

SP - 128

N2 - This document reports on the activities and achievements of a federally supported project in Arizona to provide inservice early childhood personnel with the necessary competencies and strategies to facilitate the inclusion of assistive technology for young children with disabilities. The 5-year project focused on three major assistive technology components: adaptive play, computers, and augmentative communication devices. The project relied upon an inter-agency, inter-network design to develop and field test a personnel training model that focused on the formulation and implementation of interdisciplinary partnerships. Major project activities included: (1) inservice training of interdisciplinary personnel teams; (2) independent replication of assistive technology methods and procedures by trained personnel teams; and (3) development, field-testing, and dissemination of training materials. Over 150 early childhood personnel participated in some form of project activities. Project evaluation indicated that on-site technical assistance was more beneficial in helping participants implement the ideas presented in the training sessions than were follow-up workshops. Individual sections of the report describe project activities, project evaluation methods, and project findings. Eight appendices present project evaluation data and comprise the bulk of the document. (Contains 24 references.) (DB)

UR - <http://search.proquest.com/docview/62331841?accountid=14701>

ER -

TY - GEN

ID - 2143

T1 - Real Literacy in a School Setting: Five-Year-Olds Take on the World

A1 - Hall,Nigel



Y1 - 1998///

N1 - Last updated - 2012-12-14

KW - ERIC

KW - Unsupervised Play Addition

KW - ERIC,Current Index to Journals in Education (CIJE)

KW - Primary Education

KW - Play

KW - Childrens Writing

KW - Literacy

KW - Models

RP - NOT IN FILE

SP - 8

EP - 17

JF - Reading Teacher

VL - 52

IS - 1

N2 - Summarizes the autonomous literacy paradigm often used in schools. Describes an alternative model, ideological literacy, which situates literacy practices within cultural values and practices. Shows how this functioned in a class of 4.5 to 5.5 year-olds, in which children's world of play was linked to the wider world and in which literacy had an embedded role. (SR)

UR - <http://search.proquest.com/docview/62458355?accountid=14701>

L2 - [http://sfx.scholarsportal.info/ottawa?url\\_ver=Z39.88-](http://sfx.scholarsportal.info/ottawa?url_ver=Z39.88-)

2004&rft\_val\_fmt=info:ofi/fmt:kev:mtx:journal&genre=article&sid=ProQ:ProQ%3Aericshell&atitle=Real+Lite  
racy+in+a+School+Setting%3A+Five-Year-

Olds+Take+on+the+World.&title=Reading+Teacher&issn=00340561&date=1998-01-

01&volume=52&issue=1&spage=8&au=Hall%2C+Nigel&isbn=&jtitle=Reading+Teacher&bttitle=&rft\_id=info  
:eric/EJ571642

ER -

TY - RPRT

ID - 2144

T1 - Promoting Generalized Social Interactions Using Sociodramatic Scripts in an Integrated Preschool Setting

A1 - Gronna,Sarah S.

Y1 - 1996/04//

N1 - Availability - Level 1 - Available online, if indexed January 1993 onward

SuppNotes - Paper presented at the Annual Conference of the American Educational Research Association  
(New York, NY, April 8-12, 1996)

Last updated - 2012-12-14

KW - ERIC

KW - Unsupervised Play Addition

KW - Guided Practice

KW - ERIC,Resources in Education (RIE)

KW - Preschool Education

KW - Puppetry

KW - Play

KW - Inclusive Schools

KW - Scripts

KW - Peer Relationship

KW - visual impairments

KW - Interpersonal Competence

KW - Disabilities

KW - Interpersonal Communication

KW - Learning Activities

KW - Behavior Change

KW - Prosocial Behavior

RP - NOT IN FILE

SP - 17

N2 - Many children with and without disabilities fail to develop the requisite social skills necessary to obtain a level of social competence that facilitates positive peer interactions and relationships. This study was designed to test a combination of training and generalization techniques to promote independent social interactions for children with severe visual impairment. Methods used were sociodramatic script training using puppets, social skills training, systematic instruction, and the generalization techniques of naturally occurring contingencies and multiple exemplars. The subjects included a 30-month-old girl with severe esotropia and four of her classmates without disabilities. All of the subjects were enrolled in an integrated preschool. Results demonstrated that the visually impaired child learned the target behaviors and generalized their use to free-play activities with her peers. The study supports the use of puppet script training using sociodramatic scripts to teach social skills to young children with visual impairments and suggests that script training sessions immediately followed by free play activities with group participants promotes the generalization of taught social skills without teacher prompting in the generalized setting. In addition, teaching sociodramatic scripts related to actual social skills such as greetings, respondings and conversations probably facilitated generalization since the skills taught in the scripts were more applicable to the natural environment. Further studies should incorporate additional students and group participants for puppet script training and expand data collection to all subjects. Contains 17 references. (MOK)

UR - <http://search.proquest.com/docview/62676546?accountid=14701>

ER -

TY - RPRT

ID - 2145

T1 - Maternal Scaffolding in the Child's Zone of Proximal Development: Cultural Perspectives

A1 - Kermani,Hengameh

A1 - Brenner,Mary E.

Y1 - 1996/04//

N1 - Availability - Level 1 - Available online, if indexed January 1993 onward

SuppNotes - Paper presented at the Annual Conference of the American Educational Research Association (New York, NY, April 8-12, 1996)

Last updated - 2012-12-14

KW - ERIC

KW - Unsupervised Play Addition

KW - Cultural Studies

KW - Dyads

KW - Iranian Americans

KW - Strategy Training

KW - Zone of Proximal Development

KW - ERIC,Resources in Education (RIE)

KW - Thinking Skills

KW - Play

KW - Young Children

KW - Mothers

KW - Learning Processes

KW - Cross Cultural Studies

KW - Scaffolding (Teaching Technique)

KW - Teaching Skills

KW - Parent Child Relationship

KW - Anglo Americans

KW - Child Development

KW - Cultural Differences

KW - Parents as Teachers

RP - NOT IN FILE

SP - 12

N2 - This study examined cultural differences in the amount and type of maternal scaffolding of children's learning and their effects of scaffolding on children's independent performance across two distinct activities: goal-directed versus free play. Twenty Iranian-American and 20 Anglo-American mothers with their preschool

children participated in this study. Analyses of maternal scaffolding revealed that Iranian mothers were more directive in their teaching strategies than Anglo-American mothers were in the goal-directed activity. These differences disappeared in free play. Maternal sensitivity was examined in relation to task demand and children's level of competence. No cultural differences were observed between the two groups of mothers. However, both groups altered their teaching strategies to adjust to the task demands as well as to the children's level of competence. An examination of children's independent performance revealed no cultural differences. Both groups of children performed equally well. The results of this study highlight the importance of culture, nature of task, and child's effect in mothers' construction and application of teaching strategies. (Author/MOK)

UR - <http://search.proquest.com/docview/62675859?accountid=14701>

ER -

TY - RPRT

ID - 2146

T1 - Children Thinking Mathematically Beyond Authoritative Identities

A1 - Macmillan, Agnes

Y1 - 1995///

N1 - Last updated - 2012-12-14

KW - ERIC

KW - Unsupervised Play Addition

KW - ERIC, Current Index to Journals in Education (CIJE)

KW - Primary Education

KW - Play

KW - Young Children

KW - Mathematical Concepts

KW - Observation

KW - Personal Autonomy

KW - Social Environment

RP - NOT IN FILE

SP - 111

EP - 131

N2 - Reports a study of mathematical interactions and developing attitudes of children in transition from preschool to school. Two episodes of construction play were analyzed to suggest a model of autonomous learning. Access to self-regulatory social relations was closely linked to accessibility of mathematical meanings. Contains 59 references. (FDR)

UR - <http://search.proquest.com/docview/62673800?accountid=14701>

L2 - [http://sfx.scholarsportal.info/ottawa?url\\_ver=Z39.88-](http://sfx.scholarsportal.info/ottawa?url_ver=Z39.88-)

2004&rft\_val\_fmt=info:ofi/fmt:kev:mtx:book&genre=unknown&sid=ProQ:ERIC&atitle=&title=Children+Thinking+Mathematically+Beyond+Authoritative+Identities.&issn=10332170&date=1995-01-

01&volume=&issue=&spage=111&au=Macmillan%2C+Agnes&isbn=&jtitle=&btittle=Children+Thinking+Mathematically+Beyond+Authoritative+Identities.&rft\_id=info:eric/EJ525146

ER -

TY - GEN

ID - 2147

T1 - Early Childhood Corner: The Role of Self-Directed Discovery Time in the Development of Mathematics Concepts

A1 - Andrews, Angela Giglio

Y1 - 1995///

N1 - Last updated - 2012-12-14

KW - ERIC

KW - Unsupervised Play Addition

KW - Mathematics Activities

KW - ERIC, Current Index to Journals in Education (CIJE)

KW - Teachers

KW - Practitioners

KW - Primary Education

KW - Elementary School Mathematics

KW - Play

KW - Mathematics Instruction

KW - Independent Study

KW - Learning Activities

KW - Mathematics Education

RP - NOT IN FILE

SP - 116

EP - 120

JF - Teaching Children Mathematics

VL - 2

IS - 2

N2 - Provides vignettes of self-directed discovery time in a preprimary classroom to see how to generate mathematically valuable experiences. (MKR)

UR - <http://search.proquest.com/docview/62655649?accountid=14701>

L2 - [http://sfx.scholarsportal.info/ottawa?url\\_ver=Z39.88-](http://sfx.scholarsportal.info/ottawa?url_ver=Z39.88-)

2004&rft\_val\_fmt=info:ofi/fmt:kev:mtx:journal&genre=article&sid=ProQ:ProQ%3Aericshell&atitle=Early+Childhood+Corner%3A+The+Role+of+Self-

Directed+Discovery+Time+in+the+Development+of+Mathematics+Concepts.&title=Teaching+Children+Mathematics&issn=10735836&date=1995-01-

01&volume=2&issue=2&spage=116&au=Andrews%2C+Angela+Giglio&isbn=&jtitle=Teaching+Children+Mathematics&bttitle=&rft\_id=info:eric/EJ514082

ER -

TY - BOOK

ID - 2148

T1 - Let's Begin Reading Right: Developmentally Appropriate Beginning Literacy. Third Edition

A1 - Fields, Marjorie V.

A1 - Spangler, Katherine L.

Y1 - 1995///

N1 - Availability - Level 3 - Indexed only

Last updated - 2012-12-14

KW - ERIC

KW - Unsupervised Play Addition

KW - ERIC, Resources in Education (RIE)

KW - Teachers

KW - Practitioners

KW - Early Childhood Education

KW - Writing Instruction

KW - Beginning Reading

KW - Play

KW - Reading Instruction

KW - Classroom Environment

KW - Beginning Writing

KW - Developmentally Appropriate Practices

KW - Emergent Literacy

KW - Theory Practice Relationship

KW - Whole Language Approach

RP - NOT IN FILE

SP - 398

PB - Prentice-Hall, Order Processing, P.O. Box 11071, Des Moines, IA 50336-1071 (\$27 plus shipping/handling).

N2 - Combining developmentally appropriate early childhood practice with current views of emergent literacy and whole language instruction, this book is designed to help pre-service and in-service teachers incorporate new views of literacy into their classrooms. The book includes extensive examples from actual classrooms to assist readers in understanding the teaching ideas presented. It is also designed to help the teacher of young

children understand and validate the importance of play in the child's literacy development and to take into account how children construct knowledge. Chapters in the book are: (1) Understanding Emergent Readers and Writers; (2) Encouraging Emergent Literacy through Play and Experiences; (3) Encouraging Emergent Literacy through Oral Language and Story Time; (4) Assisting Emergent Readers; (5) Assisting Emergent Writers; (6) Supporting Independent Writers; (7) Creating a Classroom for Readers; (8) Assessing Growth in Literacy; (9) Selecting Early Literacy Materials; and (10) Constructing Your Understanding. Contains approximately 500 references. (RS)

SN - 0023372834

UR - <http://search.proquest.com/docview/62745832?accountid=14701>

L2 - [http://sfx.scholarsportal.info/ottawa?url\\_ver=Z39.88-](http://sfx.scholarsportal.info/ottawa?url_ver=Z39.88-)

2004&rft\_val\_fmt=info:ofi/fmt:kev:mtx:book&genre=book&sid=ProQ:ERIC&atitle=&title=Let%27s+Begin+Reading+Right%3A+Developmentally+Appropriate+Beginning+Literacy.+Third+Edition.&issn=&date=1995-01-

01&volume=&issue=&spage=398&au=Fields%2C+Marjorie+V.%3BSpangler%2C+Katherine+L.&isbn=0023372834&jtitle=&bttitle=Let%27s+Begin+Reading+Right%3A+Developmentally+Appropriate+Beginning+Literacy.+Third+Edition.&rft\_id=info:eric/ED375381

ER -

TY - RPRT

ID - 2149

T1 - Once Upon a Classroom

A1 - Obersinner, Kathy

Y1 - 1994/12//

N1 - Availability - Level 1 - Available online, if indexed January 1993 onward

Last updated - 2012-12-14

KW - ERIC

KW - Unsupervised Play Addition

KW - Juneau Borough School District AK

KW - ERIC,Resources in Education (RIE)

KW - Grade 1

KW - Primary Education

KW - Qualitative Research

KW - Elementary School Students

KW - Dramatic Play

KW - Role Playing

KW - Conflict Resolution

KW - Conflict

KW - SOCIALIZATION

KW - Story Telling

KW - Behavior Patterns

KW - Social Development

KW - Interpersonal Relationship

RP - NOT IN FILE

SP - 17

N2 - This research project explored how children's ability to exchange ideas and resolve conflict was influenced by regularly setting aside time to dictate and act out stories. Research methods for this 3-month project included audiotapes, a questionnaire, and the stories from 23 first-grade children. Observations looked specifically at conflict resolution, roles and interactions among storytellers, and the sense of community manifested in play. Observations indicated that the children became more autonomous in exchanging ideas and listening to one another's potential solutions, as the children encountered issues that arose in the natural context of acting out their stories. As the children devised a workable structure for storytelling, they began to assume greater ownership as the process became more familiar, directing their comments and questions to one another. As they acted in one another's stories, each child's view of the world was assimilated by his or her peers. Children's story plays formed a distinctive and colorful quilt of reoccurring patterns that merged into new designs as the children shared their attempts to make sense of their world. (WP)

UR - <http://search.proquest.com/docview/62745655?accountid=14701>

ER -

TY - THES

ID - 2150

T1 - Social Cognition in Preschoolers: Social Perception Social Knowledge, and Relationship Goals and Expectations

A1 - Meece,Darrell Wesley

N1 - Last updated - 2012-12-14

SubjectsTermNotLitGenreText - 2462 10120; 7940 126; 9738 909; 8127 11655 1474 316 8016 4542; 9748 1710; 11225 1; 5446 1970 1; 5449 8768; 6752 9651 6582; 1710; 3681

IdentKeywords - Alabama

KW - ERIC

KW - Unsupervised Play Addition

KW - Alabama

KW - ERIC,Resources in Education (RIE)

KW - Cognitive Processes

KW - Play

KW - Interpersonal Competence

KW - Verbal Ability

KW - Social Behavior

KW - Cues

KW - Social Cognition

KW - Interpersonal Relationship

KW - Preschool Children

KW - Expectation

KW - Models

RP - NOT IN FILE

SP - 144

N2 - The purpose of the present study was to test the utility of a model of young children's social cognition as a predictor of preschoolers' social competence with same-age peers. The model investigated in this study proposes that three, relatively independent, domains of social-cognitive processes are pertinent to young children's peer relations. The first of these processing skills, social knowledge, was conceptualized as a repertoire of social strategies. The second skill, social perception, was conceptualized as both the accurate encoding of relevant social cues and the positive interpretation of social cues that have been encoded. The final element of this model of social cognition is young children's relationship goals and expectations, or the extent to which preschoolers would like to play with other children and feel that other children would like to play with them. Subjects in this study were 34 4- and 5-year-old children who completed multiple assessments that were developed or adapted to measure each of these domains with preschoolers. Results indicated that measures of each of the three hypothesized domains were associated with measures of children's peer competence. Furthermore, measures of aspects of two of the domains - the quality of social knowledge and positive interpretation of social cues - independently predicted teacher-rated peer competence when the subjects' general verbal ability was statistically controlled. These results are interpreted as evidence that multiple, at least partially independent, social cognitive processes may guide children's social behavior. Associations among measures of the three hypothesized domains of social cognition suggest that the hypothesis that these domains are independent may not be entirely adequate. Furthermore, the pattern of associations among measures of these domains and measures of children's verbal ability and peer competence provide some evidence that a two-factor model may provide a more accurate and parsimonious description of young children's social cognitive processing. (Contains 11 tables.) [Master Theses, Auburn University.]

UR - <http://search.proquest.com/docview/61920176?accountid=14701>

ER -

TY - GEN

ID - 2151

T1 - Rethinking Table Activities. Australian Early Childhood Resource Booklets No. 5

A1 - Cullen,Joy

Y1 - 1991/12//

N1 - Availability - Level 1 - Available online, if indexed January 1993 onward

Last updated - 2012-12-14

KW - ERIC

KW - Unsupervised Play Addition

KW - Australia

KW - ERIC,Resources in Education (RIE)

KW - Teachers

KW - Practitioners

KW - Early Childhood Education

KW - Play

KW - Class Activities

KW - Dramatic Play

KW - Student Centered Curriculum

KW - Preschool Curriculum

KW - Foreign Countries

KW - Learning Centers (Classroom)

KW - Learning Activities

KW - Creative Activities

KW - Preschool Children

KW - Learning Strategies

RP - NOT IN FILE

SP - 19

PB - Australian Early Childhood Association, , P.O. Box 105, Watson, Australian Capital Territory 2602, Australia (\$6.25 Australian).

N2 - This booklet discusses the use of structured table activities in preschool programs in Australia and alternatives to these activities, such as free play. The booklet notes that structured table activities tend to be teacher-directed, passive, non-creative, and focus on goals set by the teacher. They often do not address the learning requirements of young children, who need to feel competent and independent, pursue their own interests, represent their own experiences, focus on processes rather than products, and interact with peers and adults. The booklet recommends programming designed to meet young children's needs, that is, child-centered, active, creative, and focused on goals set by the child. Indicators of children's use of independent learning strategies, interest in activities, and use of creative processes are also examined. The booklet concludes with guidelines for the appropriate use of table activities. (MDM)

SN - 1863230289

UR - <http://search.proquest.com/docview/62769389?accountid=14701>

ER -

TY - GEN

ID - 2152

T1 - Touch the Future: Discovering Abilities through Technology for Living, Learning, Working and Playing. Southeast Regional Conference (3rd, Atlanta, Georgia, April 10-12, 1991)

Y1 - 1991/04//

N1 - Availability - Level 1 - Available online, if indexed January 1993 onward

Last updated - 2012-12-14

KW - ERIC

KW - Unsupervised Play Addition

KW - ERIC,Resources in Education (RIE)

KW - Practitioners

KW - Administrators

KW - Elementary Secondary Education

KW - Technological Advancement

KW - Financial Support

KW - Play

KW - Independent Living

KW - Employment

KW - Linking Agents

KW - Assistive Devices (for Disabled)

KW - Computer Uses in Education

KW - Accessibility (for Disabled)

KW - Disabilities

KW - Computer Oriented Programs

KW - Technology Transfer

KW - Educational Technology

RP - NOT IN FILE

SP - 245

N2 - This packet of materials was originally intended for participants in a 1991 conference on assistive technology for the disabled. After a detailed listing of the conference schedule, individual sections provide abstracts, biographical sketches, and summaries concerning the following conference topics: blending, computer labs, family, grants and funding, interactive labs, learning, living, playing, and working. Also briefly described are posters presented at the conference, the video theater, and exhibitor displays. Among topics covered are: computer programs for the traumatically brain injured, resources for employment, impact of developmental disability on a family, developing conversational interaction with the "Unicorn Board", the Alliance in Technology Access resource network, seating and mobility, supported employment and assistive technology for the severely disabled, curriculum based computerized measurement, low vision aids, the Technology Related Assistance for Individuals with Disabilities Act, setting up an Assistive Technology Demonstration Center, telecommunication in special education, the Kurzweil Personal Reader, technology and the aging, adventure programming for the physically disabled, computer access for the visually impaired, portable electronic writing aids, augmentative communication, funding, and adapted bikes. (DB)

UR - <http://search.proquest.com/docview/62906430?accountid=14701>

L2 - [http://sfx.scholarsportal.info/ottawa?url\\_ver=Z39.88-](http://sfx.scholarsportal.info/ottawa?url_ver=Z39.88-)

2004&rft\_val\_fmt=info:ofi/fmt:kev:mtx:journal&genre=unknown&sid=ProQ:ProQ%3Aericshell&atitle=Touch+the+Future%3A+Discovering+Abilities+through+Technology+for+Living%2C+Learning%2C+Working+and+Playing.+Southeast+Regional+Conference+%283rd%2C+Atlanta%2C+Georgia%2C+April+10-12%2C+1991%29.&title=&issn=&date=1991-04-

01&volume=&issue=&spage=245&au=&isbn=&jtitle=&bttitle=&rft\_id=info:eric/ED341182

ER -

TY - JOUR

ID - 2153

T1 - Creating Quality Curriculum Yet Not Buying Out the Store

A1 - Lanser, Shirley

A1 - McDonnell, Laura

Y1 - 1991///

KW - ERIC

KW - Unsupervised Play Addition

KW - City and Country School NY

KW - Pratt (Caroline)

KW - ERIC, Current Index to Journals in Education (CIJE)

KW - Preschool Education

KW - Teacher Role

KW - Program Descriptions

KW - Play

KW - Preschool Curriculum

KW - Outdoor Activities

KW - Instructional Materials

KW - Educational Practices

KW - Parent Attitudes

KW - Preschool Children

KW - Playground Activities

KW - Educational Philosophy

RP - NOT IN FILE

SP - 4



EP - 9

JF - Young Children

VL - 47

IS - 1

N2 - Describes the educational philosophy and procedures of New York City's City and Country School, where two through seven year olds use primary materials to enrich cognitive, emotional, social, and physical growth.

The school promotes deep involvement, independent learning, and increased attention span. (BB)

SN - 0044-0728, 0044-0728

UR - <http://search.proquest.com/docview/62909936?accountid=14701>

L2 - [http://sfx.scholarsportal.info/ottawa?url\\_ver=Z39.88-](http://sfx.scholarsportal.info/ottawa?url_ver=Z39.88-)

2004&rft\_val\_fmt=info:ofi/fmt:kev:mtx:journal&genre=article&sid=ProQ:ProQ%3Aericshell&atitle=Creating+Quality+Curriculum+Yet+Not+Buying+Out+the+Store.&title=Young+Children&issn=00440728&date=1991-01-

01&volume=47&issue=1&spage=4&au=Lanser%2C+Shirley%3BMcDonnell%2C+Laura&isbn=&jtitle=Young+Children&bttitle=&rft\_id=info:eric/EJ436425

ER -

TY - RPRT

ID - 2154

T1 - Parenting in Cross-Cultural Perspective: The United States, France, and Japan

A1 - Bornstein, Marc H.

Y1 - 1991///

N1 - Availability - Level 1 - Available online, if indexed January 1993 onward

Last updated - 2012-12-14

KW - ERIC

KW - Unsupervised Play Addition

KW - France

KW - Japan

KW - Nurturance

KW - United States

KW - ERIC, Resources in Education (RIE)

KW - Behavior Development

KW - Play

KW - Stimulation

KW - Speech Communication

KW - Mothers

KW - Social Behavior

KW - Cross Cultural Studies

KW - Foreign Countries

KW - Parent Child Relationship

KW - Infant Behavior

KW - Child Rearing

KW - Cultural Differences

KW - Infants

RP - NOT IN FILE

SP - 23

N2 - In this study of prominent characteristics of parenting in the United States, France, and Japan, 72 mother-infant dyads were examined. The study focused on three prominent interactive domains of visual and vocal exchange between mother and baby (nurturing, social exchange, and didactic stimulation), examining their frequency of occurrence and patterns of covariation. Findings revealed significant main effects of culture, with American mothers showing significantly higher rates of object stimulation than French or Japanese mothers. American and Japanese mothers showed equal rates of social stimulation, while American mothers engaged in more social stimulation than French mothers. Maternal behaviors appeared to be largely independent of coherence among parenting behaviors. The data indicated that mothers from the different cultures differed most in the degree to which they stimulated, spoke to, and responded to their infants vis-a-vis the object and social

worlds. Mothers were most similar in terms of the degree to which they engaged their infants in tactile kinesthetic play and responded in a nurturing or an imitative manner. (Contains 5 pages of references.) (SH)

UR - <http://search.proquest.com/docview/62553215?accountid=14701>

ER -

TY - GEN

ID - 2155

T1 - The Important Early Years: Intelligence through Movement Experiences

A1 - Diem,Liselott

Y1 - 1991///

N1 - Availability - Level 2 - Produced in microfiche (1966-2003)

SuppNotes - Originally published in German, 1986

Last updated - 2012-12-14

KW - ERIC

KW - Unsupervised Play Addition

KW - ERIC,Resources in Education (RIE)

KW - Parents

KW - Play

KW - Motor Development

KW - Young Children

KW - Perceptual Development

KW - Parent Role

KW - Creative Development

KW - Health Education

KW - Intellectual Development

KW - Childrens Games

KW - Parent Child Relationship

KW - Perceptual Motor Learning

KW - Neonates

KW - Playground Activities

RP - NOT IN FILE

SP - 99

PB - Publications Sales, AAHPERD, 1900 Association Drive, Reston, VA 22091.

N2 - It is generally recognized that early childhood experiences are extremely important for human development. The development of rational thinking, attention span, and ability to memorize in the first years of life are very much dependent upon motor experiences gained through exploring and comprehending. Early learning experiences should not be forced upon the child, but should develop through self-discovery, play with others, and personal challenges. Uninhibited movement experiences, rather than regimented or forced activities, produce the essential and lasting curiosity and thirst for knowledge necessary for human creativity. Within this context, the 28 chapters of this book discuss the following topics: spontaneity and sureness of movement; keen perceptual awareness; orientation in space; rational visualization and creativity in movement; comprehension of situations and independent reaction. The content covers prenatal through age 8, with a heavy focus on preprimary years. The book provides a variety of suggestions on how to promote a child's own competence, starting with the first year of life. (AMH)

SN - 0883144913

UR - <http://search.proquest.com/docview/62992121?accountid=14701>

ER -

TY - RPRT

ID - 2156

T1 - Childhood Antecedents of Achievement in Professional Women

A1 - Coats,Patricia Boyne

A1 - Overman,Steve

Y1 - 1989/11//

N1 - Availability - Level 1 - Available online, if indexed January 1993 onward

SuppNotes - Paper presented at the Annual Meeting of the Mid-South Educational Research Association (Little

Rock, AR, November 8-10, 1989)

Last updated - 2012-12-14

KW - ERIC

KW - Unsupervised Play Addition

KW - ERIC,Resources in Education (RIE)

KW - Professional Personnel

KW - Play

KW - Business

KW - Leisure Time

KW - Background

KW - Career Choice

KW - SOCIALIZATION

KW - Individual Development

KW - Childhood Interests

KW - Nontraditional Occupations

KW - Employed Women

KW - Females

RP - NOT IN FILE

SP - 21

N2 - While the trend for increasing numbers of women to enter the labor market is clear and career opportunities for women have expanded, women continue to be employed in occupations that are traditionally female and low-paying. This study examined childhood preferred play materials, structured and free play activities, and leisure time activities of women presently in traditional and nontraditional professions to investigate the antecedents of women's choices of careers in traditional versus nontraditional professions, with special focus on business as a profession. Independent variables antecedent to professional career choices focused on childhood socialization experiences through age 12 and included demographic variables relating to the subjects' childhood environment, family structure, parent characteristics, parental encouragement, and play. Subjects were 110 adult women from Mississippi, of whom 47 were in traditional professions, 25 were in moderately nontraditional professions, 15 were in highly nontraditional professions, and 23 were in business professions. Chi square and t-tests revealed significant differences among subgroups on several independent variables. Professional business women had participated more in competitive sports as children and (along with women in other nontraditional professions) reported more male playmates and fewer female playmates than did women in traditional professions. Women in nontraditional professions received different forms of parental encouragement than did women in traditional professions. (NB)

UR - <http://search.proquest.com/docview/63069529?accountid=14701>

L2 - [http://sfx.scholarsportal.info/ottawa?url\\_ver=Z39.88-](http://sfx.scholarsportal.info/ottawa?url_ver=Z39.88-)

2004&rft\_val\_fmt=info:ofi/fmt:kev:mtx:book&genre=unknown&sid=ProQ:ERIC&atitle=&title=Childhood+Antecedents+of+Achievement+in+Professional+Women.&issn=&date=1989-11-

01&volume=&issue=&spage=21&au=Coats%2C+Patricia+Boyne%3BOverman%2C+Steve&isbn=&jtitle=&bt

itle=Childhood+Antecedents+of+Achievement+in+Professional+Women.&rft\_id=info:eric/ED312588

ER -

TY - JOUR

ID - 2157

T1 - Making Toys Accessible for Children with Cerebral Palsy

A1 - Schaeffler,Carol

Y1 - 1988///

KW - ERIC

KW - Unsupervised Play Addition

KW - ERIC,Current Index to Journals in Education (CIJE)

KW - Practitioners

KW - Parents

KW - Accessibility (for Disabled)

KW - Play

KW - Cerebral Palsy

KW - Material Development

KW - Toys

KW - Psychomotor Skills

KW - Assistive Devices (for Disabled)

KW - Media Adaptation

RP - NOT IN FILE

SP - 26

EP - 28

JF - TEACHING Exceptional Children

VL - 20

IS - 3

N2 - Techniques for modifying toys for children with cerebral palsy to enhance active, independent use of play materials are described. The most successful techniques include stabilization; creating boundaries; and use of grasping aids, manipulation aids, and switches. Good positioning is emphasized to maximize controlled and relaxed movement and visual contact. (VW)

UR - <http://search.proquest.com/docview/63214748?accountid=14701>

L2 - [http://sfx.scholarsportal.info/ottawa?url\\_ver=Z39.88-](http://sfx.scholarsportal.info/ottawa?url_ver=Z39.88-)

2004&rft\_val\_fmt=info:ofi/fmt:kev:mtx:journal&genre=article&sid=ProQ:ProQ%3Aericshell&atitle=Making+Toys+Accessible+for+Children+with+Cerebral+Palsy.&title=Teaching+Exceptional+Children&issn=&date=1988-01-

01&volume=20&issue=3&spage=26&au=Schaeffler%2C+Carol&isbn=&jtitle=Teaching+Exceptional+Children&btile=&rft\_id=info:eric/EJ367414

ER -

TY - JOUR

ID - 2158

T1 - Early Readers: Important Emotional Considerations

A1 - Werner,Patricia Holden

A1 - Strother,JoAnna

Y1 - 1987///

KW - ERIC

KW - Unsupervised Play Addition

KW - ERIC,Current Index to Journals in Education (CIJE)

KW - Early Childhood Education

KW - Play

KW - Family Environment

KW - Young Children

KW - Emotional Development

KW - Early Reading

KW - Play Therapy

KW - Recreational Reading

KW - Independent Reading

KW - Parent Child Relationship

KW - Emotional Problems

KW - Social Development

RP - NOT IN FILE

SP - 538

EP - 543

JF - Reading Teacher

VL - 40

IS - 6

N2 - Enumerates ways to help early readers without negatively affecting their development in other areas, such as: (1) providing an atmosphere rich in environment print and positive role models, (2) using encouragement rather than praise as a means of reinforcing their progress, (3) exhibiting respect for the child, (4) eliminating criticism and minimizing mistakes, and (5) avoiding "premature structuring." (NKA)

UR - <http://search.proquest.com/docview/63265011?accountid=14701>

L2 - [http://sfx.scholarsportal.info/ottawa?url\\_ver=Z39.88-2004&rft\\_val\\_fmt=info:ofi/fmt:kev:mtx:journal&genre=article&sid=ProQ:ProQ%3Aericshell&atitle=Early+Readers%3A+Important+Emotional+Considerations.&title=Reading+Teacher&issn=&date=1987-01-01&volume=40&issue=6&spage=538&au=Werner%2C+Patricia+Holden%3BStrother%2C+JoAnna&isbn=&jtitle=Reading+Teacher&bttitle=&rft\\_id=info:eric/EJ346942](http://sfx.scholarsportal.info/ottawa?url_ver=Z39.88-2004&rft_val_fmt=info:ofi/fmt:kev:mtx:journal&genre=article&sid=ProQ:ProQ%3Aericshell&atitle=Early+Readers%3A+Important+Emotional+Considerations.&title=Reading+Teacher&issn=&date=1987-01-01&volume=40&issue=6&spage=538&au=Werner%2C+Patricia+Holden%3BStrother%2C+JoAnna&isbn=&jtitle=Reading+Teacher&bttitle=&rft_id=info:eric/EJ346942)  
ER -

TY - JOUR

ID - 2159

T1 - The Effects of Television Form and Violent Content on Boys' Attention and Social Behavior

A1 - Potts,Richard

Y1 - 1986///

KW - ERIC

KW - Unsupervised Play Addition

KW - ERIC,Current Index to Journals in Education (CIJE)

KW - Researchers

KW - Television Viewing

KW - Play

KW - Attention Span

KW - MALES

KW - Behavior Patterns

KW - Social Behavior

KW - Toys

KW - Television Research

KW - Preschool Children

KW - Aggression

KW - Violence

RP - NOT IN FILE

SP - 1

EP - 17

JF - Journal of Experimental Child Psychology

JA - J Exp.Child Psychol.

VL - 41

IS - 1

N2 - Reports on an experiment that examined the independent effects of television content (violence) and television formal features (action) on preschool boys' attention to programs and their postviewing social behavior. Shows rapid character action facilitated visual attention to the programs and that television action level had no systematic effects on subjects' behavior. (HOD)

UR - <http://search.proquest.com/docview/63334144?accountid=14701>

L2 - [http://sfx.scholarsportal.info/ottawa?url\\_ver=Z39.88-2004&rft\\_val\\_fmt=info:ofi/fmt:kev:mtx:journal&genre=article&sid=ProQ:ProQ%3Aericshell&atitle=The+Effects+of+Television+Form+and+Violent+Content+on+Boys%27+Attention+and+Social+Behavior.&title=Journal+of+Experimental+Child+Psychology&issn=&date=1986-01-01&volume=41&issue=1&spage=1&au=Potts%2C+Richard&isbn=&jtitle=Journal+of+Experimental+Child+Psychology&bttitle=&rft\\_id=info:eric/EJ336378](http://sfx.scholarsportal.info/ottawa?url_ver=Z39.88-2004&rft_val_fmt=info:ofi/fmt:kev:mtx:journal&genre=article&sid=ProQ:ProQ%3Aericshell&atitle=The+Effects+of+Television+Form+and+Violent+Content+on+Boys%27+Attention+and+Social+Behavior.&title=Journal+of+Experimental+Child+Psychology&issn=&date=1986-01-01&volume=41&issue=1&spage=1&au=Potts%2C+Richard&isbn=&jtitle=Journal+of+Experimental+Child+Psychology&bttitle=&rft_id=info:eric/EJ336378)  
ER -

TY - RPRT

ID - 2160

T1 - A Study of the Behavior of Children in a Preschool Equipped with Computers

A1 - Klinzing,Dene G.

Y1 - 1985/04//

N1 - Availability - Level 1 - Available online, if indexed January 1993 onward

SuppNotes - Paper presented at the Annual Meeting of the American Educational Research Association (69th, Chicago, IL, March 31-April 4, 1985)

Last updated - 2012-12-14

KW - ERIC

KW - Unsupervised Play Addition

KW - Solitary Play

KW - ERIC,Resources in Education (RIE)

KW - Preschool Education

KW - Teacher Role

KW - Play

KW - Microcomputers

KW - Laboratory Schools

KW - Class Activities

KW - Cooperation

KW - Sex Differences

KW - Interaction Process Analysis

KW - Preschool Children

KW - Age Differences

RP - NOT IN FILE

SP - 44

N2 - A study was conducted: (1) to compare the popularity of computer stations with nine other activity stations; (2) to determine the differences in the type of play displayed by the children in preschool and note the type of play displayed at the computer stations versus the other activity stations; (3) to determine whether the preschool activities, particularly the computer activities, were teacher directed; (4) to describe the communication interactions; and (5) to determine whether children's choices of computer activities varied by sex. For 2 weeks, four observers gathered data in a classroom for 4-year-olds and a classroom for 5-year-olds. Both classrooms had housekeeping, art, language arts, blocks, cooking, science, and manipulative activities. The classroom for 4-year-olds had an Apple IIe computer, while the classroom for 5-year-olds had a PLATO terminal, a Turtle robot, and an Apple IIe computer. The children were free to choose among a number of software programs. Several measures were taken: (1) frequency counts of the number of children at each station; (2) identification of play behavior (using Parton's Play Classifications); (3) instances of teacher-directed play; (4) verbal interaction (using Flanders' Interaction Analysis Scale); and (5) frequency counts of the number of male and female children at computer stations. Results indicated that, while 4-year-old males used the computer extensively, other children seemed to engage in a wide variety of activities, including computer use. While activities generally were not teacher-directed, teachers did tend to direct the computer activities of the 4-year-olds and to use more praise in those activities. (These effects might have been due to the computer's relative novelty in that classroom.) The computers seemed to encourage both cooperative and independent play. (CB)

UR - <http://search.proquest.com/docview/63361030?accountid=14701>

L2 - [http://sfx.scholarsportal.info/ottawa?url\\_ver=Z39.88-](http://sfx.scholarsportal.info/ottawa?url_ver=Z39.88-)

2004&rft\_val\_fmt=info:ofi/fmt:kev:mtx:book&genre=unknown&sid=ProQ:ERIC&atitle=&title=A+Study+of+the+Behavior+of+Children+in+a+Preschool+Equipped+with+Computers.&issn=&date=1985-04-01&volume=&issue=&spage=44&au=Klinzing%2C+Dene+G.&isbn=&jtitle=&btittle=A+Study+of+the+Behavi+or+of+Children+in+a+Preschool+Equipped+with+Computers.&rft\_id=info:eric/ED255320

ER -

TY - GEN

ID - 2161

T1 - Where Service Begins: Working with Parents to Provide Early Intervention. Considerations for the Culturally Different

A1 - Rogow,Sally M.

Y1 - 1985/04//

N1 - Availability - Level 1 - Available online, if indexed January 1993 onward

SuppNotes - Paper presented at the Annual Convention of the Council for Exceptional Children (63rd, Anaheim, CA, April 15-19, 1985)

Last updated - 2012-12-14

KW - ERIC

KW - Unsupervised Play Addition

KW - ERIC,Resources in Education (RIE)

KW - Play

KW - Young Children

KW - Home Programs

KW - Family School Relationship

KW - Disabilities

KW - Intervention

KW - Cultural Differences

KW - Chinese Americans

KW - Family (Sociological Unit)

RP - NOT IN FILE

SP - 14

N2 - The difficulties faced by culturally different parents of multiply handicapped young children are considered, and examples of families of Chinese origin are offered to illustrate the impact of cultural styles and beliefs. The structure of the Chinese family is analyzed, its reaction to professionals and handicapped people explained. Guidelines for providing services to culturally different families are offered and three major goals of home intervention noted: (1) helping the parents to recognize the importance of working with the child, (2) encouraging independent behavior and helping the child to achieve specific developmental goals, and (3) demonstrating the value and importance of adult/child interactions. The use of play as an intervention medium is stressed. (CL)

UR - <http://search.proquest.com/docview/63386274?accountid=14701>

ER -

TY - RPRT

ID - 2162

T1 - Accelerating Language Learning in Young Children

A1 - Roth,Froma P.

Y1 - 1984///

N1 - Last updated - 2012-12-14

KW - ERIC

KW - Unsupervised Play Addition

KW - ERIC,Current Index to Journals in Education (CIJE)

KW - Language Research

KW - Psycholinguistics

KW - Play

KW - Language Acquisition

KW - Cognitive Development

KW - Young Children

KW - Child Language

KW - Grammar

RP - NOT IN FILE

SP - 89

EP - 107

N2 - Examined effects of direct intervention on language learning. Using a toy manipulation task, 18 children aged 3;6 to 4;6 were systematically taught linguistic structures beyond their developmental grasp. Solid improvement was found in the experimental conditions; no significant improvement was noted in control conditions, showing that the language learning process is somewhat independent of cognitive development. (SL)

UR - <http://search.proquest.com/docview/63454865?accountid=14701>

L2 - [http://sfx.scholarsportal.info/ottawa?url\\_ver=Z39.88-](http://sfx.scholarsportal.info/ottawa?url_ver=Z39.88-)

2004&rft\_val\_fmt=info:ofi/fmt:kev:mtx:book&genre=unknown&sid=ProQ:ERIC&atitle=&title=Accelerating+Language+Learning+in+Young+Children.&issn=&date=1984-01-01&volume=&issue=&spage=89&au=Roth%2C+Froma+P.&isbn=&jtitle=&btitle=Accelerating+Language+Learning+in+Young+Children.&rft\_id=info:eric/EJ295254

ER -

TY - JOUR

ID - 2163

T1 - A Simple Thing Like a Swing

A1 - Brenner,Suzanne

Y1 - 1983/04//

KW - ERIC

KW - Unsupervised Play Addition

KW - ERIC,Current Index to Journals in Education (CIJE)

KW - Preschool Education

KW - Downs Syndrome

KW - Play

KW - Parent Materials

KW - Parent Child Relationship

KW - Parent Attitudes

KW - Playground Activities

RP - NOT IN FILE

SP - 11

EP - 13

JA - Exceptional Parent

VL - 13

IS - 2

N2 - The mother of a Down's syndrome four-year-old describes how a slight adaptation in a playground swing allowed her son to experience the joy of independent play. (CL)

UR - <http://search.proquest.com/docview/63531825?accountid=14701>

L2 - [http://sfx.scholarsportal.info/ottawa?url\\_ver=Z39.88-](http://sfx.scholarsportal.info/ottawa?url_ver=Z39.88-)

2004&rft\_val\_fmt=info:ofi/fmt:kev:mtx:journal&genre=article&sid=ProQ:ProQ%3Aericshell&atitle=A+Simple+Thing+Like+a+Swing.&title=Exceptional+Parent&issn=&date=1983-04-

01&volume=13&issue=2&page=11&au=Brenner%2C+Suzanne&isbn=&jtitle=Exceptional+Parent&btitle=&rft\_id=info:eric/EJ285360

ER -

TY - GEN

ID - 2164

T1 - "I Got Religion!"--Evangelism in Language Teaching

A1 - Maley,Alan

Y1 - 1983///

N1 - Availability - Level 1 - Available online, if indexed January 1993 onward

SuppNotes - In: Savignon, Sandra J., Ed. and Berns, Margie S., Ed. *Communicative Language Teaching: Where Are We Going?* Urbana, Language Learning Laboratory, University of Illinois at Urbana-Champaign, 1983; see FL 016 358

Last updated - 2012-12-14

KW - ERIC

KW - Unsupervised Play Addition

KW - ERIC,Resources in Education (RIE)

KW - Teacher Role

KW - Affective Objectives

KW - Student Role

KW - Play

KW - Communicative Competence (Languages)

KW - Teacher Attitudes

KW - Language Teachers

KW - Educational Trends

KW - Group Dynamics

KW - Humanistic Education

KW - Second Language Instruction

KW - Teaching Methods

KW - Learning Strategies

RP - NOT IN FILE

SP - 9



N2 - There is a risk of second language teachers becoming emotionally overcharged about innovative methods and techniques. Innovators promoting particular methods often claim comprehensive answers to instructional problems, and in spite of an apparent concern for scientific respectability, new approaches take on some characteristics of religious movements. But panaceas do not exist, and pedagogical movements should be kept in perspective. Among the positive results of new approaches are changes in the roles of teacher and learner, emphasis on group supportiveness, relaxation and reduction of threat to the learner, realization of the hidden capacity of the human brain, enhancement of the role of play in learning, changes in attitudes about error, emphasis on building inner learner criteria, and recognition of the value of creative silence. However, some of the approaches are also contradictory or inconsistent. Teachers must learn to exercise independent judgment about teaching methods and not accept them wholesale. (MSE)

UR - <http://search.proquest.com/docview/63209603?accountid=14701>

L2 - [http://sfx.scholarsportal.info/ottawa?url\\_ver=Z39.88-](http://sfx.scholarsportal.info/ottawa?url_ver=Z39.88-)

2004&rft\_val\_fmt=info:ofi/fmt:kev:mtx:journal&genre=article&sid=ProQ:ProQ%3Aericshell&atitle=%22I+Go

t+Religion%21%22--Evangelism+in+Language+Teaching.&title=&issn=&date=1983-01-

01&volume=&issue=&spage=9&au=Maley%2C+Alan&isbn=&jtitle=&bttitle=&rft\_id=info:eric/ED278231

ER -

TY - GEN

ID - 2165

T1 - Conceptual Development and Early Multiword Speech

A1 - Shore,Cecilia

Y1 - 1982/03//

N1 - Availability - Level 1 - Available online, if indexed January 1993 onward

SuppNotes - Paper presented at the International Conference on Infant Studies (Austin, TX, March 1982)

Last updated - 2012-12-14

KW - ERIC

KW - Unsupervised Play Addition

KW - Blocks

KW - Multiword Speech

KW - symbolic play

KW - ERIC,Resources in Education (RIE)

KW - Language Usage

KW - Language Research

KW - Concept Formation

KW - Play

KW - Language Acquisition

KW - Child Language

KW - Infants

RP - NOT IN FILE

SP - 17

N2 - The purposes of this study were to investigate (1) the level of development of four target vocal and gestural symbols (Doggie, Cup, Car, and Fiffin, a novel concept), and (2) the relationship of symbolic maturity to the use of symbols in combinations. Thirty infants (15 boys and 15 girls), between 82 and 91 weeks of age, were observed for approximately 45 minutes in a laboratory playroom setting. During the sessions a number of tasks were administered which were designed to assess the children's use of words and conventional gestures, as well as their ability to combine words and gestures. For each target concept, four potential exemplars were presented: a realistic exemplar, an "unusual" exemplar, a perceptually similar member of the same superordinate category, and an object often found with the target object, or related by contiguity. A total of 16 trials were ordered semi-randomly so that no two objects from the same category or level of membership were presented together. The child's utterances during these and other interactions with the experimenter were transcribed. The data were used to obtain several measures of multiword use, including the longest utterance in different content words, the mean length of utterance (MLU) in content words on the five longest utterances, and MLU in morphemes on the five longest utterances. The children's play and language were transcribed by two independent coders. Only actions and utterances agreed upon by both coders were entered into analyses. Results are discussed. (Author/RH)

UR - <http://search.proquest.com/docview/63566469?accountid=14701>

L2 - [http://sfx.scholarsportal.info/ottawa?url\\_ver=Z39.88-2004&rft\\_val\\_fmt=info:ofi/fmt:kev:mtx:journal&genre=unknown&sid=ProQ:ProQ%3Aericshell&atitle=Conceptual+Development+and+Early+Multiword+Speech.&title=&issn=&date=1982-03-01&volume=&issue=&spage=17&au=Shore%2C+Cecilia&isbn=&jtitle=&bttitle=&rft\\_id=info:eric/ED214640](http://sfx.scholarsportal.info/ottawa?url_ver=Z39.88-2004&rft_val_fmt=info:ofi/fmt:kev:mtx:journal&genre=unknown&sid=ProQ:ProQ%3Aericshell&atitle=Conceptual+Development+and+Early+Multiword+Speech.&title=&issn=&date=1982-03-01&volume=&issue=&spage=17&au=Shore%2C+Cecilia&isbn=&jtitle=&bttitle=&rft_id=info:eric/ED214640)  
ER -

TY - GEN

ID - 2166

T1 - Cognitive Correlates of Early Multiword Speech

A1 - Shore,Cecilia

Y1 - 1982/03//

N1 - Availability - Level 1 - Available online, if indexed January 1993 onward

SuppNotes - Paper presented at the International Conference on Infant Studies (Austin, TX, March 1982)

Last updated - 2012-12-14

KW - ERIC

KW - Unsupervised Play Addition

KW - Blocks

KW - Multiword Speech

KW - symbolic play

KW - ERIC,Resources in Education (RIE)

KW - Language Research

KW - Cognitive Ability

KW - Play

KW - Cognitive Development

KW - Language Skills

KW - Child Language

KW - Semantics

KW - Infants

RP - NOT IN FILE

SP - 11

N2 - Relationships between "combinatorial" abilities in language, symbolic play, blockbuilding, and non-semantic action sequences were explored in a study of 30 infants between 82 and 91 weeks of age. Subjects were observed in a laboratory playroom setting for approximately 45 minutes. During this time, a number of tasks were administered which were aimed at assessing the child's ability to combine his or her actions into sequences. For each of four target objects, two scenarios were modeled: one involved an appropriate exemplar of a target object (Doggie, Cup, Car, or Fiffin, a novel concept), and the other involved an inappropriate object which was substituted for the target object (e.g., a flashlight as a doggie). Additionally, the experimenter modeled meaningless actions and constructed four block structures. The children's utterances during the entire session were transcribed. Data on infants'"combinatorial" abilities were obtained in five domains: symbolic play with appropriate objects, symbolic play with inappropriate objects, non-semantic action sequences, blockbuilding, and language. Two independent transcripts were made of each child's utterances and play. Only those behaviors agreed upon by two raters were included in the analyses. Results are discussed. (Author/RH)

UR - <http://search.proquest.com/docview/63566866?accountid=14701>

L2 - [http://sfx.scholarsportal.info/ottawa?url\\_ver=Z39.88-2004&rft\\_val\\_fmt=info:ofi/fmt:kev:mtx:journal&genre=unknown&sid=ProQ:ProQ%3Aericshell&atitle=Cognitive+Correlates+of+Early+Multiword+Speech.&title=&issn=&date=1982-03-01&volume=&issue=&spage=11&au=Shore%2C+Cecilia&isbn=&jtitle=&bttitle=&rft\\_id=info:eric/ED214641](http://sfx.scholarsportal.info/ottawa?url_ver=Z39.88-2004&rft_val_fmt=info:ofi/fmt:kev:mtx:journal&genre=unknown&sid=ProQ:ProQ%3Aericshell&atitle=Cognitive+Correlates+of+Early+Multiword+Speech.&title=&issn=&date=1982-03-01&volume=&issue=&spage=11&au=Shore%2C+Cecilia&isbn=&jtitle=&bttitle=&rft_id=info:eric/ED214641)  
ER -

TY - RPRT

ID - 2167

T1 - Summary of a Study of Father Fantasies of Preschool Children with Nonresident Fathers

A1 - Michaels,Carol S.

Y1 - 1981/08//

N1 - Availability - Level 1 - Available online, if indexed January 1993 onward

SuppNotes - Paper presented at the Annual Meeting of the American Psychological Association (89th, Los

Angeles, CA, August 24-28, 1981)

Last updated - 2012-12-14

KW - ERIC

KW - Unsupervised Play Addition

KW - ERIC,Resources in Education (RIE)

KW - Mothers

KW - Parent Role

KW - Fatherless Family

KW - Fathers

KW - Childhood Attitudes

KW - Fantasy

KW - Sex Differences

KW - Parent Attitudes

KW - Pretend Play

KW - Preschool Children

KW - Coping

KW - One Parent Family

RP - NOT IN FILE

SP - 11

N2 - Preschool children's fantasy views of their fathers who had left home before the children were 3 years of age were investigated by trained observers during three separate 20-minute doll play sessions conducted within 12 consecutive school days. Ninety-six pairs of black, white, and hispanic mothers and children ranging in age from 5 to approximately 6.5 years participated in the study. Observers recorded each child's doll play responses on precoded record sheets. Independent variables considered in the study were child's age at father's departure, gender, quantity of contact, ethnicity, and maternal attitudes toward the nonresident father. A total of 18,846 fantasies were produced by the children and nearly 46 per cent included the absent father, while the present mother was included in 43 per cent of the fantasies. All of the children's father fantasies were categorized into "good," "bad" and "silhouette" fantasies. The "good" father fantasies, signifying affectionate, heroic, sexual, happy interactions with the father doll, accounted for 21 per cent of the father fantasies and were significantly associated with the maternal attitude variable. "Bad" fantasies, signifying aggressive, authoritarian, withdrawing, and sad interactions with the father doll were relatively few in number (8.6 per cent) and could be accounted for by several variables of which gender was the most important. The high proportion of "silhouette" fantasies, signifying passive, stereotyped, and unimaginitive doll interactions, (15.1 per cent) suggests that such fantasies, being relatively free from strong emotion and personal conflict, comprise an important element in the children's play. Conclusions drawn from the results are discussed. (Author/RH)

UR - <http://search.proquest.com/docview/63559480?accountid=14701>

L2 - [http://sfx.scholarsportal.info/ottawa?url\\_ver=Z39.88-](http://sfx.scholarsportal.info/ottawa?url_ver=Z39.88-)

2004&rft\_val\_fmt=info:ofi/fmt:kev:mtx:book&genre=unknown&sid=ProQ:ERIC&atitle=&title=Summary+of+a+Study+of+Father+Fantasies+of+Preschool+Children+with+Nonresident+Fathers.&issn=&date=1981-08-01&volume=&issue=&spage=11&au=Michaels%2C+Carol+S.&isbn=&jtitle=&bttitle=Summary+of+a+Study+of+Father+Fantasies+of+Preschool+Children+with+Nonresident+Fathers.&rft\_id=info:eric/ED208987

ER -

TY - JOUR

ID - 2168

T1 - Effects of Maternal Interference on the Attachment and Exploratory Behavior of One-Year-Olds

A1 - Gray, Madelyn D.

Y1 - 1979/12//

KW - ERIC

KW - Unsupervised Play Addition

KW - Exploratory Behavior

KW - Maternal Interference

KW - ERIC,Current Index to Journals in Education (CIJE)

KW - Play

KW - Parent Child Relationship

KW - Mothers

KW - Attachment Behavior

KW - Infants

RP - NOT IN FILE

SP - 1211

EP - 1214

JF - Child Development

JA - Child Dev.

VL - 50

IS - 4

N2 - Results from a study of 40 one-year-old children and their mothers showed that maternal interference with children's independent object play had no short-term effect on infant social initiatives to mother, responsiveness to mother's social bids, or exploratory play. (JMB)

UR - <http://search.proquest.com/docview/63736465?accountid=14701>

L2 - [http://sfx.scholarsportal.info/ottawa?url\\_ver=Z39.88-](http://sfx.scholarsportal.info/ottawa?url_ver=Z39.88-)

2004&rft\_val\_fmt=info:ofi/fmt:kev:mtx:journal&genre=article&sid=ProQ:ProQ%3Aericshell&atitle=Effects+of+Maternal+Interference+on+the+Attachment+and+Exploratory+Behavior+of+One-Year-Olds.&title=Child+Development&issn=&date=1979-12-

01&volume=50&issue=4&spage=1211&au=Gray%2C+Madelyn+D.&isbn=&jtitle=Child+Development&bttitle=&rft\_id=info:eric/EJ226086

ER -

TY - GEN

ID - 2169

T1 - Considerations for Integration of Physically Handicapped and Non-Handicapped Preschool Children

A1 - Cormack,Elizabeth O.

Y1 - 1979/04//

N1 - Availability - Level 1 - Available online, if indexed January 1993 onward

SuppNotes - Paper presented at the Annual International Convention, The Council for Exceptional Children (57th, Dallas, Texas, April 22-27, 1979, Session T-59)

Last updated - 2012-12-14

KW - ERIC

KW - Unsupervised Play Addition

KW - Spina Bifida

KW - ERIC,Resources in Education (RIE)

KW - Preschool Education

KW - Program Descriptions

KW - Social Experience

KW - Mainstreaming

KW - Blindness

KW - Cerebral Palsy

KW - Environmental Influences

KW - Educational Experience

KW - Adjustment (to Environment)

KW - Perceptual Motor Learning

KW - Peer Influence

KW - Developmental Stages

KW - Physical Disabilities

KW - Congenital Impairments

RP - NOT IN FILE

SP - 15

N2 - Eight physically handicapped (blind, spina bifida, cerebral palsy, or genetic defect) preschool children and eight children with normal sensory motor abilities (mean age of both groups 3 1/2 years) participated in a preschool demonstration project designed to promote equal educational and social experiences in an integrated preschool through the use of environmental adaptation and multisensory media. Independent mobility, developmental skill levels, and number and quality of peer interactions were measured. The surroundings were designed to promote independent mobility and peer interaction and included a number of sitting and working

options, such as bolsters, and carpet squares, as well as floor level easels and tables of various shapes and heights. Results of the assessment indicated increased social interactions, accelerated developmental rates, and improved independence. (PHR)

UR - <http://search.proquest.com/docview/63766651?accountid=14701>

L2 - [http://sfx.scholarsportal.info/ottawa?url\\_ver=Z39.88-](http://sfx.scholarsportal.info/ottawa?url_ver=Z39.88-)

2004&rft\_val\_fmt=info:ofi/fmt:kev:mtx:journal&genre=unknown&sid=ProQ:ProQ%3Aericshell&atitle=Considerations+for+Integration+of+Physically+Handicapped+and+Non-Handicapped+Preschool+Children.&title=&issn=&date=1979-04-01&volume=&issue=&spage=15&au=Cormack%2C+Elizabeth+O.&isbn=&jtitle=&bttitle=&rft\_id=info:eric/ED171024

ER -

TY - RPRT

ID - 2170

T1 - The Relation of Children's Activity Preference to Sex-Typed Behavior

A1 - Carpenter,Jan C.

Y1 - 1978/08//

N1 - Availability - Level 1 - Available online, if indexed January 1993 onward

SuppNotes - Paper presented at the Annual Meeting of the American Psychological Association (86th, Toronto, Canada, August 28-September 1, 1978)

Last updated - 2012-12-14

KW - ERIC

KW - Unsupervised Play Addition

KW - Structured Activities

KW - Unstructured Activities

KW - ERIC,Resources in Education (RIE)

KW - Preschool Education

KW - Sex Role

KW - Play

KW - Classroom Research

KW - Sex Differences

KW - Conformity

KW - Feedback

KW - Preschool Children

KW - SOCIALIZATION

KW - Models

RP - NOT IN FILE

SP - 15

N2 - The relationship between aspects of preschool socialization experiences and sex-typed behavior was investigated in this study. Three hypotheses were tested: (1) that preschool play activities differ consistently in structure level, (2) that there are sex differences in participation in activities classified as high or low structure, and (3) that children of both sexes are more compliant in highly structured activities and show more novel use of materials and self-initiated activity changes in low structure activities. The behaviors and activities of 83 children, ages 2 1/2 to 5, and their teachers in five preschool classrooms were coded by trained observers during daily free-choice activity periods. The activities were coded for degree of structure by the amounts of individual and group feedback provided by the teacher. An additional index of structure consisted of a parent questionnaire concerning availability of an adult model in the home for 20 analogous activities. Preschool activities were found to differ in level of structure on all indices. Boys participated more than girls in the low-structure activities, and girls participated more than boys in the high-structure activities for all indices. Compliance occurred more often in the high- than low-structure activities as indexed by feedback, but the reverse occurred on the index of modeling. Novel behavior occurred more often in low-structure activities on the index of individual feedback. Compliance and novelty were a function of activity, not of sex. Sex differences independent of activity were found only for self-initiated activity. (Author/SS)

UR - <http://search.proquest.com/docview/63765708?accountid=14701>

L2 - [http://sfx.scholarsportal.info/ottawa?url\\_ver=Z39.88-](http://sfx.scholarsportal.info/ottawa?url_ver=Z39.88-)

2004&rft\_val\_fmt=info:ofi/fmt:kev:mtx:book&genre=unknown&sid=ProQ:ERIC&atitle=&title=The+Relation

+of+Children%27s+Activity+Preference+to+Sex-Typed+Behavior.&issn=&date=1978-08-01&volume=&issue=&page=15&au=Carpenter%2C+Jan+C.&isbn=&jtitle=&bttitle=The+Relation+of+Children%27s+Activity+Preference+to+Sex-Typed+Behavior.&rft\_id=info:eric/ED170052  
ER -

TY - GEN

ID - 2171

T1 - Social Skills Assessment and Curricula

A1 - Bair, Anne G.

Y1 - 1976/11//

N1 - Availability - Level 1 - Available online, if indexed January 1993 onward

SuppNotes - Paper presented at the Conference, Breaking Affective Barriers for the Handicapped, Virginia Council on Health and Medical Care (Roanoke, Virginia, November 21-23, 1976) ; Appendix may not reproduce clearly due to print quality

Last updated - 2012-12-14

KW - ERIC

KW - Unsupervised Play Addition

KW - ERIC, Resources in Education (RIE)

KW - Early Childhood Education

KW - Handicapped Children

KW - Play

KW - Curriculum

KW - Social Development

KW - Toys

RP - NOT IN FILE

SP - 46

N2 - Described is an independent toy play curriculum for young handicapped children. It is explained that toys were analyzed according to functions in three classifications: functional toy skills (toys designed to elicit simple motor actions of short duration); physical toy skills (toys designed to elicit gross motor action); and constructive toy skills (toys designed to elicit the child's imagination and organization). The curriculum includes information on pretesting and instruction, as well as progress profiles and instructional profiles which list behavioral objectives and criteria for each toy. Also included is information on nine other curricula for social, communication, self help and occupational development of handicapped children. (CL)

UR - <http://search.proquest.com/docview/63899950?accountid=14701>

ER -

TY - GEN

ID - 2172

T1 - In Defense of Playfulness

A1 - Dillon, Stephen V.

Y1 - 1975///

N1 - Last updated - 2012-12-14

KW - ERIC

KW - Unsupervised Play Addition

KW - ERIC, Current Index to Journals in Education (CIJE)

KW - Junior High Schools

KW - Humanistic Education

KW - Play

KW - Classroom Environment

KW - Goal Orientation

KW - Psychological Needs

KW - Psychological Characteristics

KW - Elementary Schools

KW - Discovery Learning

KW - Achievement Need

KW - Models

RP - NOT IN FILE

SP - 206

EP - 213

JF - Elementary School Journal

VL - 75

IS - 4

N2 - Discusses how "Messing About" may lead to exploratory learning and, ultimately, to steady growth in productive thought and problem-solving ability. Emphasizes the role of classroom organization and teacher-models of competence in facilitating autonomous interest. (CS)

UR - <http://search.proquest.com/docview/64077596?accountid=14701>

L2 - [http://sfx.scholarsportal.info/ottawa?url\\_ver=Z39.88-](http://sfx.scholarsportal.info/ottawa?url_ver=Z39.88-)

2004&rft\_val\_fmt=info:ofi/fmt:kev:mtx:journal&genre=unknown&sid=ProQ:ProQ%3Aericshell&atitle=In+De

fense+of+Playfulness&title=Elementary+School+Journal&issn=&date=1975-01-

01&volume=75&issue=4&spage=206&au=Dillon%2C+Stephen+V.&isbn=&jtitle=Elementary+School+Journal

&bttitle=&rft\_id=info:eric/EJ109714

ER -

TY - RPRT

ID - 2173

T1 - Transformations and Codes in Early Pretending

A1 - Fein,Greta G.

Y1 - 1974/09//

N1 - Availability - Level 1 - Available online, if indexed January 1993 onward

SuppNotes - A briefer version of this paper was presented at the Annual Meeting of the American Psychological Association (82nd, New Orleans, Louisiana, Aug. 30-Sept. 3, 1974)

Last updated - 2012-12-14

KW - ERIC

KW - Unsupervised Play Addition

KW - Piaget (Jean)

KW - ERIC,Resources in Education (RIE)

KW - Early Childhood Education

KW - Behavior Development

KW - Cognitive Development

KW - Imitation

KW - Responses

KW - Literature Reviews

KW - Imagination

KW - Infant Behavior

KW - Behavior Patterns

KW - Toys

KW - Pretend Play

KW - Infants

RP - NOT IN FILE

SP - 37

N2 - Evidence which suggests that pretend activities become increasingly independent of the presence of realistic objects is examined in this paper. Results of research on pretend behavior in children 1 1/2 - 2 years of age are described and analyzed. Striking changes in pretend behavior are shown to occur during the second year of life. Pretend play is treated as a paradigm for understanding how children represent objects and relations. It is argued that the child can pretend that one thing is another when he can represent objects (or object activities) as prototypes and when he can use the core properties of prototypes to transform representations of immediate physical stimulation. The analysis suggests a three-phase sequence in the development of pretending based on a progression from the analogue mapping of representations to the selection and, eventually, the production of the core properties of object representations. (Author/ED)

UR - <http://search.proquest.com/docview/63978710?accountid=14701>

ER -

TY - RPRT

ID - 2174

T1 - Home-Based Educational Curricula for Mothers and Infants

A1 - Apfel,Nancy

A1 - Brion,LaRue

Y1 - 1974///

N1 - Availability - Level 2 - Produced in microfiche (1966-2003)

SuppNotes - Not available in hard copy due to sections of marginal legibility of original document; Journal reprints and flyers of the original document are copyrighted and therefore not available. They have not been included in the pagination

Last updated - 2012-12-14

KW - ERIC

KW - Unsupervised Play Addition

KW - Curriculum Research in Infant Education

KW - ERIC,Resources in Education (RIE)

KW - Preschool Education

KW - Parent Education

KW - Interaction

KW - Play

KW - Language Acquisition

KW - Home Visits

KW - Intervention

KW - Observation

KW - Instructional Materials

KW - Home Programs

KW - Parent Child Relationship

KW - Child Rearing

KW - Social Development

KW - Pretend Play

KW - Infants

RP - NOT IN FILE

SP - 526

VL - OCD-CB-98

N2 - This package contains five home-based intervention curricula for families with children between 12 and 30 months of age. Three independent curricula (each emphasizing children's language, play or social development) enlist the mother's aid as observer, teacher and researcher, and promote a three-way interaction among mother, child, and home-visitor. The Mother Only curriculum combines the three independent curricula into a single program in which the primary interaction is between the mother and home-visitor, to the exclusion of the child (who should benefit from the education the mother receives). Likewise, the Baby Only curriculum is in combination form, but with the mother excluded from the intervention program. Each curriculum contains materials for a program of 32 visits by a trained home visitor over an 18-month period. The goals, home-visitor role, patterns of visits, and problems encountered in testing the language, play, and social development curricula are briefly discussed. (ED)

UR - <http://search.proquest.com/docview/63970153?accountid=14701>

ER -

TY - RPRT

ID - 2175

T1 - Toward the Development of a Technique to Measure the Racial Awareness-Attitudes of Three- to Five-Year-Old Children

A1 - Scanlan,Peter A.

A1 - Dokecki,Paul R.

Y1 - 1973/05//

N1 - Availability - Level 1 - Available online, if indexed January 1993 onward

Last updated - 2012-12-14

KW - ERIC



KW - Unsupervised Play Addition  
KW - Demonstration and Research Ctr Early Child Educ  
KW - ERIC,Resources in Education (RIE)  
KW - Early Childhood Education  
KW - Racial Identification  
KW - Play  
KW - Research Methodology  
KW - Socioeconomic Status  
KW - Racial Attitudes  
KW - Geographic Regions  
KW - Racial Differences  
KW - Literature Reviews  
KW - Measurement Techniques  
KW - Social Science Research  
KW - Perception  
KW - Sex Differences  
KW - Preschool Children  
KW - Age Differences  
RP - NOT IN FILE  
SP - 28

N2 - This paper presents a comprehensive review of research literature in the area of interracial awareness development in preschool children and highlights key issues for future research. An historical look at the study of racial attitudes reveals three major research techniques. The first type utilizes pictures, line drawings, or actual photos. The chief drawback of this technique is that it relies heavily on the child's linguistic ability and does not allow the use of unstructured play. A second technique involves the use of puzzles, doll assembly, or picture insets. This method is suitable for measuring racial awareness but not attitudes. A third technique involves doll-play and seems to offer the most promise for future investigators of racial awareness attitudes in young children. The independent variables shown to be significant which must be considered for future studies are age, race, sex, social class, shade of skin color, contact, region of the country, and race of the interviewer.  
(MS)

UR - <http://search.proquest.com/docview/63919095?accountid=14701>

ER -

TY - BOOK

ID - 2176

T1 - I Can Do It. Project Enlightenment

A1 - Coley,Elise D.

Y1 - 1973///

N1 - Availability - Level 2 - Produced in microfiche (1966-2003)

SuppNotes - For related documents, see EC 202 488-497

Last updated - 2012-12-14

KW - ERIC

KW - Unsupervised Play Addition

KW - ERIC,Resources in Education (RIE)

KW - Parents

KW - Preschool Education

KW - Parent Education

KW - Play

KW - Family Environment

KW - Home Programs

KW - Parent Role

KW - Child Development

KW - Skill Development

RP - NOT IN FILE

SP - 49

PB - Project Enlightenment, 501 S. Boylan Ave., Raleigh, NC 27603 (\$4.00).

N2 - This book is designed for use by parents at home to help them encourage the development of necessary skills in their preschool-age children through play and other daily living experiences. The activities are presented as a series of short paragraphs written in the first person from the child's perspective with a box that the child can check when he or she accomplishes the task described. The experiences are intended to strengthen the use of the child's five senses, enhance the acquisition of language and prereading skills, provide opportunities for conceptual growth through reasoning and independent observation, and encourage social growth and development. Specific activities take advantage of routine household chores such as grocery shopping, cooking, and cleaning as well as outside play and visits to community facilities (e.g., parks, schools, fire stations) as potential learning opportunities. The three sections group the activities by those occurring inside the house, those immediately outside the house, and those in the neighborhood. A section at the end of the book reviews each of the skill areas that are important to a young child's growth in terms of how the skills are acquired and how they contribute to later development. (VW)

UR - <http://search.proquest.com/docview/63165892?accountid=14701>

L2 - [http://sfx.scholarsportal.info/ottawa?url\\_ver=Z39.88-](http://sfx.scholarsportal.info/ottawa?url_ver=Z39.88-)

2004&rft\_val\_fmt=info:ofi/fmt:kev:mtx:book&genre=book&sid=ProQ:ERIC&atitle=&title=I+Can+Do+It.+Project+Enlightenment.&issn=&date=1973-01-01&volume=&issue=&spage=49&au=Coley%2C+Elise+D.&isbn=&jtitle=&btittle=I+Can+Do+It.+Project+Enlightenment.&rft\_id=info:eric/ED293293

ER -

TY - GEN

ID - 2177

T1 - A History of the Children's Theatre Association of Baltimore, Maryland from 1943-1966

A1 - Kraus,Joanna Halpert

Y1 - 1972///

N1 - Availability - Level 3 - Indexed only

SuppNotes - Ed.D. Dissertation, Columbia University

Last updated - 2012-12-14

KW - ERIC

KW - Unsupervised Play Addition

KW - Childrens Theatre Association MD

KW - Maryland (Baltimore)

KW - ERIC,Resources in Education (RIE)

KW - Play

KW - Speech Communication

KW - Creative Dramatics

KW - Research Projects

KW - Theater Arts

KW - Child Development

KW - Humanities

KW - Drama

RP - NOT IN FILE

SP - 408

PB - University Microfilms, A Xerox Company, Dissertation Copies, Post Office Box 1764, Ann Arbor, Michigan 48106 (Order No. 72-19,518, Mfilm \$4.00, Xerography \$10.00)

N2 - A descriptive history is presented of the Children's Theatre Association of Baltimore, an independent community children's theater, focusing on the years 1943-1966, the period in which founder Isabel Burger was in office. The Association's educational goals, influence, and contribution to the community are stressed. A major portion of the research was obtained from unpublished sources. Separate chapters of the study discuss the expansion of artistic activity, community influence, administrative policy, national and international activities of the Association's founder, and Burger's professional activities and the status of the organization since her retirement. Appendices include a chronological listing of all productions and the forms sent to past participants. The study demonstrates that the Theatre's goal of human development through the use of drama and the dynamic personality of the founder had great influence. (LH)

UR - <http://search.proquest.com/docview/64186166?accountid=14701>

L2 - [http://sfx.scholarsportal.info/ottawa?url\\_ver=Z39.88-2004&rft\\_val\\_fmt=info:ofi/fmt:kev:mtx:journal&genre=unknown&sid=ProQ:ProQ%3Aericshell&atitle=A+History+of+the+Children%27s+Theatre+Association+of+Baltimore%2C+Maryland+from+1943-1966.&title=&issn=&date=1972-01-01&volume=&issue=&spage=408&au=Kraus%2C+Joanna+Halpert&isbn=&jtitle=&btittle=&rft\\_id=info:eric/ED067682](http://sfx.scholarsportal.info/ottawa?url_ver=Z39.88-2004&rft_val_fmt=info:ofi/fmt:kev:mtx:journal&genre=unknown&sid=ProQ:ProQ%3Aericshell&atitle=A+History+of+the+Children%27s+Theatre+Association+of+Baltimore%2C+Maryland+from+1943-1966.&title=&issn=&date=1972-01-01&volume=&issue=&spage=408&au=Kraus%2C+Joanna+Halpert&isbn=&jtitle=&btittle=&rft_id=info:eric/ED067682)  
ER -

TY - RPRT

ID - 2178

T1 - Project CHILD

A1 - Robison,Helen F.

Y1 - 1970/10//

N1 - Availability - Level 1 - Available online, if indexed January 1993 onward

Last updated - 2012-12-14

KW - ERIC

KW - Unsupervised Play Addition

KW - ERIC,Resources in Education (RIE)

KW - Program Descriptions

KW - Auditory Discrimination

KW - Teacher Behavior

KW - Play

KW - Language Acquisition

KW - Teacher Education

KW - Intervention

KW - Teacher Effectiveness

KW - Preschool Curriculum

KW - Curriculum Development

KW - Educational Change

KW - Disadvantaged Youth

KW - Compensatory Education

KW - Teaching Methods

RP - NOT IN FILE

SP - 113

N2 - This document described Project CHILD, a program of educational change and curriculum development for disadvantaged prekindergarten and kindergarten children. The historical part of this report indicates that the project began in 1966 with a small-scale study of teacher behavior and children's responses in a few classrooms in a Harlem school district. This study led to the development of a research instrument and suggested the overwhelming need for program improvement. In 1966-'67 the curriculum was compiled in rough form and implemented on a very limited basis. Data from this period focuses on language development, a major emphasis of the curriculum. 1967-'68 was a year of broadening the implementation effort, as four teachers used the program with in-depth training. The curriculum was revised during this year, as it became a 2-year intervention approach. The field study was backed up by much data collection, including a detailed project to determine intervention effects on auditory discrimination. By 1968-'69 the program had developed a comprehensive curriculum package, and the report focuses on problems encountered in changing teachers' methods and attitudes. A content analysis of the curriculum discusses internal inconsistencies on theoretical issues, language arts training, views of play, teaching strategies, motor development, and behavioral objectives. Appendix A is an independent assessment of the curriculum, Appendix B describes the goals, procedures, and history of the parent project, and Appendix C is a description of the curriculum prepared for an educational conference. (DP)

UR - <http://search.proquest.com/docview/64100542?accountid=14701>

ER -

TY - JOUR

ID - 2179

T1 - Drama Education in the Age of AIDS

A1 - Singh,Lorraine

Y1 - 2012/10//  
KW - ERIC  
KW - Unsupervised Play Addition  
KW - Kwazulu  
KW - South Africa (Natal)  
KW - ERIC,Current Index to Journals in Education (CIJE)  
KW - Higher Education  
KW - Student Teacher Attitudes  
KW - Cultural Context  
KW - Didacticism  
KW - Drama Workshops  
KW - Dramatic Play  
KW - World Views  
KW - Preservice Teacher Education  
KW - Controversial Issues (Course Content)  
KW - Skill Development  
KW - Health Promotion  
KW - Sexuality  
KW - Student Experience  
KW - Foreign Countries  
KW - Social Attitudes  
KW - Teaching Skills  
KW - Educational Practices  
KW - Acquired Immunodeficiency Syndrome (AIDS)  
KW - Females  
KW - Knowledge Base for Teaching  
KW - Critical Theory  
KW - Teaching Methods  
RP - NOT IN FILE  
SP - 21  
EP - 29  
JF - Perspectives in Education  
VL - 30  
IS - 3

PB - Perspectives in Education. Faculty of Education, University of the Free State, Bloemfontein 9301, South Africa. Fax: +27-51-401-7044; e-mail: pie@ufs.ac.za; Web site: <http://search.sabinet.co.za/pie>

N2 - This article arose out of my involvement in an undergraduate drama module at the School of Education, University of KwaZulu-Natal, where I made use of workshop theatre methodologies to explore how second-year drama students construct knowledge and develop sociocultural understandings of critical issues in society. The workshop theatre project described in this article aimed to allow drama students to explore and expose the myths, practices and world view associated with the sexual behaviour of young people in two townships and on two campuses. The purpose was to ensure that, as prospective teachers, these students are prepared with knowledge and skills to engage their future learners on this topic in a relevant and effective manner. The article draws on the theories of applied drama and argues for workshoping as a cogent means of researching and representing social issues. The data-gathering process undertaken by students, and the plays constructed from the analysis are described. I conclude with a discussion on how the methodology reflected the beliefs and attitudes of the participants in a contextualised manner, exposing a flaw in their image of the sexually liberated and independent young woman. I also show how the approach allowed me to develop an emancipatory pedagogy which endows students with authority

SN - 0258-2236, 0258-2236

UR - <http://search.proquest.com/docview/1347459520?accountid=14701>

L2 - [http://sfx.scholarsportal.info/ottawa?url\\_ver=Z39.88-](http://sfx.scholarsportal.info/ottawa?url_ver=Z39.88-)

2004&rft\_val\_fmt=info:ofi/fmt:kev:mtx:journal&genre=article&sid=ProQ:ProQ%3Aericshell&atitle=Drama+Education+in+the+Age+of+AIDS&title=Perspectives+in+Education&issn=02582236&date=2012-10-01&volume=30&issue=3&spage=21&au=Singh%2C+Lorraine&isbn=&jtitle=Perspectives+in+Education&btitl e=&rft\_id=info:eric/EJ998096

ER -

TY - JOUR

ID - 2180

T1 - Computer Use within a Play-Based Early Years Curriculum

A1 - Howard,Justine

A1 - Miles,Gareth E.

A1 - Rees-Davies,Laura

Y1 - 2012///

KW - ERIC

KW - Unsupervised Play Addition

KW - Wales (South)

KW - Kruskal Wallis Test

KW - Mann Whitney U Test

KW - ERIC,Current Index to Journals in Education (CIJE)

KW - Early Childhood Education

KW - Computer Use

KW - Information Technology

KW - Foreign Countries

KW - Play

KW - Computers

KW - Learner Engagement

KW - Semi Structured Interviews

KW - Preschool Children

KW - Computer Uses in Education

KW - Computer Literacy

RP - NOT IN FILE

SP - 175

EP - 189

JA - International Journal of Early Years Education

VL - 20

IS - 2

PB - Routledge. , 325 Chestnut Street Suite 800, Philadelphia, PA 19106.

N2 - Early years curricula promote learning through play and in addition emphasise the development of computer literacy. Previous research, however, has described that teachers feel unprepared to integrate Information and Communication Technology (ICT) and play. Also, whereas research has suggested that effective computer use in the early years is associated with adult direction, further research suggests adult presence can inhibit play and reduce children's engagement. Focusing on 12 settings following the Welsh play-based Foundation Phase, this paper explores teachers' experiences of integrating computer use into classroom practice, children's levels of engagement with computer activities and how playful children perceive computer use to be. Teachers confidently delivered a variety of computing experiences. Children consistently rated these activities as play regardless of adult presence and demonstrated moderate to high levels of engagement. Findings and the features of observed practice are discussed in relation to the teachers' role as a play partner and the successful co-construction of the play-based curriculum. (Contains 3 tables and 1 figure.)

SN - 0966-9760, 0966-9760

UR - <http://search.proquest.com/docview/1238188138?accountid=14701>L2 - [http://sfx.scholarsportal.info/ottawa?url\\_ver=Z39.88-](http://sfx.scholarsportal.info/ottawa?url_ver=Z39.88-)

2004&rft\_val\_fmt=info:ofi/fmt:kev:mtx:journal&genre=article&sid=ProQ:ProQ%3Aericshell&atitle=Computer+Use+within+a+Play-Based+Early+Years+Curriculum&title=International+Journal+of+Early+Years+Education&issn=09669760&date=2012-01-

01&volume=20&issue=2&spage=175&au=Howard%2C+Justine%3BMiles%2C+Gareth+E.%3BRees-

Davies%2C+Laura&isbn=&jtitle=International+Journal+of+Early+Years+Education&bttitle=&rft\_id=info:eric/EJ983545

ER -

TY - JOUR

ID - 2182

T1 - Program-Level Influences on the Measurement of Early Communication for Infants and Toddlers in Early Head Start

A1 - Greenwood, Charles R.

A1 - Buzhardt, Jay

A1 - Walker, Dale

A1 - Howard, Waylon J.

A1 - Anderson, Rawni

Y1 - 2011/06//

KW - ERIC

KW - Unsupervised Play Addition

KW - ERIC, Current Index to Journals in Education (CIJE)

KW - Early Childhood Education

KW - Geographic Location

KW - Program Effectiveness

KW - Toddlers

KW - Play

KW - Individualized Family Service Plans

KW - Socioeconomic Status

KW - Decision Making

KW - Outcomes of Education

KW - Communication Skills

KW - Evaluation Methods

KW - Program Improvement

KW - Program Implementation

KW - Disadvantaged Youth

KW - Early Intervention

KW - Program Evaluation

KW - Total Communication

KW - Limited English Speaking

KW - Infants

RP - NOT IN FILE

SP - 110

EP - 134

JF - Journal of Early Intervention

VL - 33

IS - 2

PB - SAGE Publications. 2455 Teller Road, Thousand Oaks, CA 91320.

N2 - Measurement in early childhood is an increasingly large-scale endeavor addressing purposes of accountability, program improvement, child outcomes, and intervention decision making for individual children. The Early Communication Indicator (ECI) is a measure relevant to intervention decision making for infants and toddlers, including response to intervention approaches. The widespread use of the ECI is growing in multiple programs and states. Local program staff members collect ECI data and, with their program directors, manage their own system of ECI measurement. Program-level implementations represent independent ECI measurement replications, and the success of each potentially influences the quality of data produced and, ultimately, the validity of the inferences made thereof. The purpose of this research was to examine program-level influences on child-level ECI total communication growth and 36-month outcomes in a large sample of children, including those with individual family service plans served by multiple Early Head Start programs in two states. Results indicated variation in programs' sociodemographic composition, ECI implementation quality, ECI total communication growth, and 36-month outcomes. Program-level sociodemographic composition was found not to be an influence on ECI growth or 36-month outcomes, whereas state location and implementation quality were. Implications are discussed. (Contains 6 notes, 7 tables, and 3 figures.)

SN - 1053-8151, 1053-8151

UR - <http://search.proquest.com/docview/964170388?accountid=14701>

L2 - [http://sfx.scholarsportal.info/ottawa?url\\_ver=Z39.88-2004&rft\\_val\\_fmt=info:ofi/fmt:kev:mtx:journal&genre=article&sid=ProQ:ProQ%3Aericshell&atitle=Program-Level+Influences+on+the+Measurement+of+Early+Communication+for+Infants+and+Toddlers+in+Early+Head+Start&title=Journal+of+Early+Intervention&issn=10538151&date=2011-06-01&volume=33&issue=2&page=110&au=Greenwood%2C+Charles+R.%3BBuzhardt%2C+Jay%3BWalker%2C+Dale%3BHoward%2C+Waylon+J.%3BAnderson%2C+Rawni&isbn=&jtitle=Journal+of+Early+Intervention&bttitle=&rft\\_id=info:eric/EJ938926](http://sfx.scholarsportal.info/ottawa?url_ver=Z39.88-2004&rft_val_fmt=info:ofi/fmt:kev:mtx:journal&genre=article&sid=ProQ:ProQ%3Aericshell&atitle=Program-Level+Influences+on+the+Measurement+of+Early+Communication+for+Infants+and+Toddlers+in+Early+Head+Start&title=Journal+of+Early+Intervention&issn=10538151&date=2011-06-01&volume=33&issue=2&page=110&au=Greenwood%2C+Charles+R.%3BBuzhardt%2C+Jay%3BWalker%2C+Dale%3BHoward%2C+Waylon+J.%3BAnderson%2C+Rawni&isbn=&jtitle=Journal+of+Early+Intervention&bttitle=&rft_id=info:eric/EJ938926)  
ER -

TY - JOUR

ID - 2183

T1 - Effects of Conditioning Voices as Reinforcers for Listener Responses on Rate of Learning, Awareness, and Preferences for Listening to Stories in Preschoolers with Autism

A1 - Greer,Douglas R.

A1 - Pistoljevic,Nirvana

A1 - Cahill,Claire

A1 - Du,Lin

Y1 - 2011///

KW - ERIC

KW - Unsupervised Play Addition

KW - ERIC,Current Index to Journals in Education (CIJE)

KW - Preschool Education

KW - Learning

KW - Play

KW - Responses

KW - Intervention

KW - Verbal Stimuli

KW - Adults

KW - Behavior Problems

KW - Auditory Stimuli

KW - Conditioning

KW - Story Telling

KW - Reinforcement

KW - Intervals

KW - Preschool Children

KW - Autism

KW - Listening Skills

RP - NOT IN FILE

SP - 103

EP - 124

JF - Analysis of Verbal Behavior

VL - 27

PB - Association for Behavior Analysis International. 1219 South Park Street, Kalamazoo, MI 49001.

N2 - We used a delayed non-concurrent pre- and post-intervention probe design to test the effects of a voice conditioning protocol (VCP) with 3 preschoolers with autism on (a) rate of acquisition of listener curricular objectives, (b) observing voices and the presence of adults across 3 settings, (c) selecting to listen to adults tell stories in free play setting, and (d) the occurrence of stereotypy in the story setting. The VCP conditioned voices as reinforcers for listening to recordings of voices via stimulus-stimulus pairing, which resulted in the children listening to audio recordings of voices in 90% of intervals in 5-min concurrent-operant preference tests. After voices became conditioned reinforcers, all 3 children's learning accelerated; 2 children's observing responses increased in the 3 settings; and 2 children selected to listen to stories and also showed decreased stereotypy in the story setting. The data suggest that conditioned reinforcement for observing responses may be a verbal behavior developmental cusp that acts to accelerate learning that involves listening, and that the cusp may be induced using the VCP. (Contains 4 tables and 6 figures.)

SN - 0889-9401, 0889-9401

UR - <http://search.proquest.com/docview/1011399513?accountid=14701>

L2 - [http://sfx.scholarsportal.info/ottawa?url\\_ver=Z39.88-2004&rft\\_val\\_fmt=info:ofi/fmt:kev:mtx:journal&genre=article&sid=ProQ:ProQ%3Aericshell&atitle=Effects+of+Conditioning+Voices+as+Reinforcers+for+Listener+Responses+on+Rate+of+Learning%2C+Awareness%2C+and+Preferences+for+Listening+to+Stories+in+Preschoolers+with+Autism&title=Analysis+of+Verbal+Behavior&issn=08899401&date=2011-01-01&volume=27&issue=&spage=103&au=Greer%2C+Douglas+R.%3BPistoljevic%2C+Nirvana%3BCahill%2C+Claire%3BDu%2C+Lin&isbn=&jtitle=Analysis+of+Verbal+Behavior&bttitle=&rft\\_id=info:eric/EJ959195](http://sfx.scholarsportal.info/ottawa?url_ver=Z39.88-2004&rft_val_fmt=info:ofi/fmt:kev:mtx:journal&genre=article&sid=ProQ:ProQ%3Aericshell&atitle=Effects+of+Conditioning+Voices+as+Reinforcers+for+Listener+Responses+on+Rate+of+Learning%2C+Awareness%2C+and+Preferences+for+Listening+to+Stories+in+Preschoolers+with+Autism&title=Analysis+of+Verbal+Behavior&issn=08899401&date=2011-01-01&volume=27&issue=&spage=103&au=Greer%2C+Douglas+R.%3BPistoljevic%2C+Nirvana%3BCahill%2C+Claire%3BDu%2C+Lin&isbn=&jtitle=Analysis+of+Verbal+Behavior&bttitle=&rft_id=info:eric/EJ959195)  
ER -

TY - JOUR

ID - 2184

T1 - Differences in Practitioners' Understanding of Play and How This Influences Pedagogy and Children's Perceptions of Play

A1 - McInnes, Karen

A1 - Howard, Justine

A1 - Miles, Gareth

A1 - Crowley, Kevin

Y1 - 2011///

KW - ERIC

KW - Unsupervised Play Addition

KW - United Kingdom

KW - ERIC, Current Index to Journals in Education (CIJE)

KW - Early Childhood Education

KW - Teacher Role

KW - Play

KW - Role Perception

KW - Aptitude Treatment Interaction

KW - Child Caregivers

KW - Teacher Attitudes

KW - Protocol Materials

KW - Observation

KW - Foreign Countries

KW - Individual Differences

KW - Educational Practices

KW - Interaction Process Analysis

KW - Learning Activities

KW - Interviews

RP - NOT IN FILE

SP - 121

EP - 133

JF - Early Years: An International Journal of Research and Development

VL - 31

IS - 2

PB - Routledge, ., 325 Chestnut Street Suite 800, Philadelphia, PA 19106.

N2 - This paper presents research that examines the links between practitioners' understanding of play and its relationship to learning, their pedagogic interactions with children and children's own perceptions of their play. Previous research has shown a mismatch between practitioners' understanding of play and their practice. This research identifies how differences in understanding of play, especially the role of the adult, by practitioners in two unrelated settings are associated with variation in pedagogic interactions emphasising choice and control. Furthermore, it is argued that these differences are reflected in differences in children's use of the cue of adult presence as a defining feature of play and not-play activities. (Contains 2 tables.)

SN - 0957-5146, 0957-5146

UR - <http://search.proquest.com/docview/889927638?accountid=14701>

L2 - [http://sfx.scholarsportal.info/ottawa?url\\_ver=Z39.88-2004&rft\\_val\\_fmt=info:ofi/fmt:kev:mtx:journal&genre=article&sid=ProQ:ProQ%3Aericshell&atitle=Differences+in+Practitioners%27+Understanding+of+Play+and+How+This+Influences+Pedagogy+and+Children%27s+](http://sfx.scholarsportal.info/ottawa?url_ver=Z39.88-2004&rft_val_fmt=info:ofi/fmt:kev:mtx:journal&genre=article&sid=ProQ:ProQ%3Aericshell&atitle=Differences+in+Practitioners%27+Understanding+of+Play+and+How+This+Influences+Pedagogy+and+Children%27s+)

2004&rft\_val\_fmt=info:ofi/fmt:kev:mtx:journal&genre=article&sid=ProQ:ProQ%3Aericshell&atitle=Differences+in+Practitioners%27+Understanding+of+Play+and+How+This+Influences+Pedagogy+and+Children%27s+



Perceptions+of+Play&title=Early+Years%3A+An+International+Journal+of+Research+and+Development&issn=09575146&date=2011-01-01&volume=31&issue=2&page=121&au=McInnes%2C+Karen%3BHoward%2C+Justine%3BMiles%2C+Gareth%3BCrowley%2C+Kevin&isbn=&jtitle=Early+Years%3A+An+International+Journal+of+Research+and+Development&btitle=&rft\_id=info:eric/EJ932620  
ER -

TY - JOUR

ID - 2185

T1 - Sharing Attention and Activities among Toddlers: The Spatial Dimension of the Setting and the Educator's Role

A1 - Musatti,Tullia

A1 - Mayer,Susanna

Y1 - 2011///

KW - ERIC

KW - Unsupervised Play Addition

KW - Italy

KW - ERIC,Current Index to Journals in Education (CIJE)

KW - Preschool Education

KW - Preschool Teachers

KW - Teacher Role

KW - Interaction

KW - Toddlers

KW - Play

KW - Cognitive Development

KW - Child Behavior

KW - Classroom Environment

KW - Early Childhood Education

KW - Child Care

KW - Classroom Design

KW - Video Technology

KW - Foreign Countries

KW - Environmental Influences

KW - Educational Practices

KW - Child Development

KW - Learning Activities

KW - Psychomotor Skills

RP - NOT IN FILE

SP - 207

EP - 221

JA - European Early Childhood Education Research Journal

VL - 19

IS - 2

PB - Routledge. , 325 Chestnut Street Suite 800, Philadelphia, PA 19106.

N2 - The study proposes an analysis of the processes through which the material and symbolic features of the setting and the activities of the educators interact to determine the children's experience in an early educational centre. This analysis is of particular interest with regard to both educational practice and understanding developmental processes during children's second year of life. During this period, important changes occur in children's interaction with the environment in its physical and social components, on the basis of their cognitive development as well as of their acquired capacity to independent locomotion. Two examples will be presented that illustrate how the educators' activities and the spatial arrangement of the setting combine and interact with toddlers' recently acquired independent locomotion in sustaining their cognitive engagement and social encounters during their daily routine in an educational centre. The discussion of the examples opens new perspectives for understanding early sociality in a group situation and for innovating educational practices. (Contains 3 figures.)

SN - 1350-293X, 1350-293X

UR - <http://search.proquest.com/docview/889928342?accountid=14701>

L2 - [http://sfx.scholarsportal.info/ottawa?url\\_ver=Z39.88-](http://sfx.scholarsportal.info/ottawa?url_ver=Z39.88-)

2004&rft\_val\_fmt=info:ofi/fmt:kev:mtx:journal&genre=article&sid=ProQ:ProQ%3Aericshell&atitle=Sharing+Attention+and+Activities+among+Toddlers%3A+The+Spatial+Dimension+of+the+Setting+and+the+Educator%27s+Role&title=European+Early+Childhood+Education+Research+Journal&issn=1350293X&date=2011-01-01&volume=19&issue=2&page=207&au=Musatti%2C+Tullia%3BMayer%2C+Susanna&isbn=&jtitle=European+Early+Childhood+Education+Research+Journal&bttitle=&rft\_id=info:eric/EJ933040

ER -

TY - JOUR

ID - 2186

T1 - The Influence of Father Education Programs on the Levels of Father Involvement with Children: An Experimental Study

A1 - Taskin,Necdet

A1 - Erkan,Semra

Y1 - 2009///

KW - ERIC

KW - Unsupervised Play Addition

KW - Turkey

KW - ERIC,Current Index to Journals in Education (CIJE)

KW - Parent Education

KW - Program Effectiveness

KW - Foreign Countries

KW - Play

KW - Nonparametric Statistics

KW - Parent Child Relationship

KW - Child Care

KW - Interviews

KW - CHILDREN

KW - Fathers

KW - Pretests Posttests

RP - NOT IN FILE

SP - 136

EP - 148

JF - Hacettepe University Journal of Education

VL - 37

PB - Hacettepe University. Faculty of Education, Beytepe, Ankara 06800, Turkey. Tel: +90-312-2978583; Fax: +90-312-2992083; e-mail: [efdergi@hacettepe.edu.tr](mailto:efdergi@hacettepe.edu.tr); Web site: <http://www.efdergi.hacettepe.edu.tr>

N2 - This study aims to reveal the effects of father education programs on the levels of their involvement with their children aged 2 to 9. The study group comprised 14 fathers who participate in a father education program. The study employed the pre-test-posttest design. Data were collected by using Father Interview Forms. The independent variable of the study is the Father Education Program activity implemented on the study group between the pre- and posttest. Starting from one week after the fathers were given the Father Interview Form as a pretest, the fathers took participated a 10-week education. One week after the education program was complete, the same test was administered once again to the fathers as a posttest. Data obtained from the study were analyzed with the Non-Parametric Wilcoxon Signed Rank Test. The findings have shown that the father education program increased "the frequency of fathers becoming involved with their children's games, going out with their children, having verbal interactions with them, teaching them new things, becoming involved with their daily care, and looking after them at special times". (Contains 7 tables.)

SN - 1300-5340, 1300-5340

UR - <http://search.proquest.com/docview/61808843?accountid=14701>

L2 - [http://sfx.scholarsportal.info/ottawa?url\\_ver=Z39.88-](http://sfx.scholarsportal.info/ottawa?url_ver=Z39.88-)

2004&rft\_val\_fmt=info:ofi/fmt:kev:mtx:journal&genre=article&sid=ProQ:ProQ%3Aericshell&atitle=The+Influence+of+Father+Education+Programs+on+the+Levels+of+Father+Involvement+with+Children%3A+An+Experimental+Study&title=Hacettepe+University+Journal+of+Education&issn=13005340&date=2009-01-

01&volume=37&issue=&spage=136&au=Taskin%2C+Necdet%3BERkan%2C+Semra&isbn=&jtitle=Hacettepe  
+University+Journal+of+Education&bttitle=&rft\_id=info:eric/EJ871025  
ER -

TY - JOUR

ID - 2188

T1 - Social Grooming in the Kindergarten: The Emergence of Flattery Behavior

A1 - Fu,Genyue

A1 - Lee,Kang

Y1 - 2007/03//

KW - ERIC

KW - Unsupervised Play Addition

KW - ERIC,Current Index to Journals in Education (CIJE)

KW - Kindergarten

KW - Social Influences

KW - Play

KW - Child Behavior

KW - Developmental Psychology

KW - Psychological Patterns

KW - Freehand Drawing

KW - Interpersonal Communication

KW - Social Development

KW - Preschool Children

KW - Age Differences

KW - Social Environment

RP - NOT IN FILE

SP - 255

EP - 265

JF - Developmental Science

VL - 10

IS - 2

PB - Wiley-Blackwell. 350 Main Street, Malden, MA 02148.

N2 - The present study examined the emergence of flattery behavior in young children and factors that might affect whether and how it is displayed. Preschool children between the ages of 3 and 6 years were asked to rate drawings produced by either a present or absent adult stranger (Experiments 1 and 2), child stranger (Experiments 2 and 3), classmate, or the children's own teacher (Experiment 3). Young preschoolers gave consistent ratings to the same drawing by the person regardless of whether the person was absent or present. In contrast, many older preschoolers gave more flattering ratings to the drawing when the person was present than in the person's absence. Also, older preschoolers displayed flattery regardless of whether the recipient was an adult or a child. However, they displayed flattery to a greater extent towards familiar individuals than unfamiliar ones, demonstrating an emerging sensitivity to social contexts in which flattery is used. These findings suggest that preschoolers have already learned not to articulate bluntly their true feelings and thoughts about others.

Rather, they are able to manipulate their communications according to social context

SN - 1363-755X, 1363-755X

UR - <http://search.proquest.com/docview/61855508?accountid=14701>

L2 - [http://sfx.scholarsportal.info/ottawa?url\\_ver=Z39.88-](http://sfx.scholarsportal.info/ottawa?url_ver=Z39.88-)

2004&rft\_val\_fmt=info:ofi/fmt:kev:mtx:journal&genre=article&sid=ProQ:ProQ%3Aericshell&atitle=Social+G  
rooming+in+the+Kindergarten%3A+The+Emergence+of+Flattery+Behavior&title=Developmental+Science&is  
sn=1363755X&date=2007-03-

01&volume=10&issue=2&spage=255&au=Fu%2C+Genyue%3BLEe%2C+Kang&isbn=&jtitle=Developmental  
+Science&bttitle=&rft\_id=info:eric/EJ849122

ER -

TY - JOUR

ID - 2189

T1 - Reflecting on "Project Katrina" and Developmentally Appropriate Practices: A Graduate Student's Perspective

A1 - Schellhaas, Andree

A1 - Burts, Diane C.

A1 - Aghayan, Carol

Y1 - 2007/01//

KW - ERIC

KW - Unsupervised Play Addition

KW - ERIC, Current Index to Journals in Education (CIJE)

KW - Early Childhood Education

KW - Preschool Education

KW - Writing for Publication

KW - School Community Relationship

KW - Teacher Student Relationship

KW - Graduate Students

KW - Play

KW - Integrated Curriculum

KW - Peer Relationship

KW - Laboratory Schools

KW - Developmentally Appropriate Practices

KW - Child Development

KW - Natural Disasters

KW - Preschool Children

KW - Teaching Methods

RP - NOT IN FILE

SP - 77

EP - 81

JF - Journal of Early Childhood Teacher Education

VL - 28

IS - 1

PB - Routledge, 325 Chestnut Street Suite 800, Philadelphia, PA 19106.

N2 - This article describes the independent study project of a student who was a graduate assistant in a child development laboratory preschool when Hurricanes Katrina and Rita struck the Gulf Coast area. Through her experiences with "Project Katrina" she deepens her understanding of developmentally appropriate practices as she learns firsthand about the project approach and writing an article for publication in a professional journal

SN - 1090-1027, 1090-1027

UR - <http://search.proquest.com/docview/61882899?accountid=14701>

L2 - [http://sfx.scholarsportal.info/ottawa?url\\_ver=Z39.88-2004&rft\\_val\\_fmt=info:ofi/fmt:kev:mtx:journal&genre=article&sid=ProQ:ProQ%3Aericshell&atitle=Reflecting+on+%22Project+Katrina%22+and+Developmentally+Appropriate+Practices%3A+A+Graduate+Student%27s+Perspective&title=Journal+of+Early+Childhood+Teacher+Education&issn=10901027&date=2007-01-01&volume=28&issue=1&spage=77&au=Schellhaas%2C+Andree%3BBurts%2C+Diane+C.%3BAghayan%2C+Carol&isbn=&jtitle=Journal+of+Early+Childhood+Teacher+Education&bttitle=&rft\\_id=info:eric/EJ828428](http://sfx.scholarsportal.info/ottawa?url_ver=Z39.88-2004&rft_val_fmt=info:ofi/fmt:kev:mtx:journal&genre=article&sid=ProQ:ProQ%3Aericshell&atitle=Reflecting+on+%22Project+Katrina%22+and+Developmentally+Appropriate+Practices%3A+A+Graduate+Student%27s+Perspective&title=Journal+of+Early+Childhood+Teacher+Education&issn=10901027&date=2007-01-01&volume=28&issue=1&spage=77&au=Schellhaas%2C+Andree%3BBurts%2C+Diane+C.%3BAghayan%2C+Carol&isbn=&jtitle=Journal+of+Early+Childhood+Teacher+Education&bttitle=&rft_id=info:eric/EJ828428)

ER -

TY - JOUR

ID - 2190

T1 - The Funeral of Froggy the Frog: The Child as Dramatist, Designer, and Realist

A1 - Cummins, Lauren

Y1 - 2004/07//

KW - ERIC

KW - Unsupervised Play Addition

KW - ERIC, Current Index to Journals in Education (CIJE)

KW - Death

KW - Play

KW - Childrens Literature

KW - Emotional Response

KW - Art Expression

KW - Creativity

KW - Coping

KW - Drama

RP - NOT IN FILE

SP - 87

EP - 91

JF - Young Children

VL - 59

IS - 4

PB - National Association for the Education of Young Children. 1313 L Street NW Suite 500, Washington, DC 22205-4101.

N2 - One sunny afternoon, six-year-old Zachary and his friend John Michael, four and a half, discovered a dead frog in a bag of clay in the garage. Zachary proposed, "Let's have a funeral for the frog." This is how the funeral drama of Froggy the Frog began. This article describes the play experiences of Zachary and John Michael as designers, dramatists, and realists and addresses their specific play experience with death through the funeral of Froggy. In this article, the author explains the creative and artistic aspect of producing the funeral, and how they expressed their emotions and questions. She presents tips for adults in helping children understand and cope with death, as well as children's books on death and dying. (Contains a list of 23 resources.)

SN - 1538-6619, 1538-6619

UR - <http://search.proquest.com/docview/62022109?accountid=14701>

L2 - [http://sfx.scholarsportal.info/ottawa?url\\_ver=Z39.88-](http://sfx.scholarsportal.info/ottawa?url_ver=Z39.88-)

2004&rft\_val\_fmt=info:ofi/fmt:kev:mtx:journal&genre=article&sid=ProQ:ProQ%3Aericshell&atitle=The+Funeral+of+Froggy+the+Frog%3A+The+Child+as+Dramatist%2C+Designer%2C+and+Realist&title=Young+Children&issn=15386619&date=2004-07-

01&volume=59&issue=4&spage=87&au=Cummins%2C+Lauren&isbn=&jtitle=Young+Children&btitle=&rft\_id=info:eric/EJ751303

ER -

TY - JOUR

ID - 2191

T1 - Young Children's Play Qualities in Same-, Other-, and Mixed-Sex Peer Groups

A1 - Fabes,Richard A.

A1 - Martin,Carol Lynn

A1 - Hanish,Laura D.

Y1 - 2003///

KW - ERIC

KW - Unsupervised Play Addition

KW - Cross Sex Interaction

KW - Cross Sex Peers

KW - Dyads

KW - Same Sex Interaction

KW - Same Sex Peers

KW - ERIC,Current Index to Journals in Education (CIJE)

KW - Context Effect

KW - Comparative Analysis

KW - Play

KW - Gender Issues

KW - Peer Influence

KW - Sex Differences

KW - Preschool Children

KW - Peer Groups

RP - NOT IN FILE

SP - 921

EP - 932

JF - Child Development

JA - Child Dev.

VL - 74

IS - 3

N2 - This study examined how children's play varied as function of child's sex, play partner's sex, and whether they played in dyads or groups. Observation data revealed that boys' same-sex play was more active-forceful, farther from presence of adults, and more stereotyped than girls', a pattern exaggerated in groups. Mixed-sex play was more likely than other configurations to occur near adults and was intermediate in active-forceful and stereotyped activities. (Author/KB)

SN - 0009-3920, 0009-3920

UR - <http://search.proquest.com/docview/62165882?accountid=14701>

L2 - [http://sfx.scholarsportal.info/ottawa?url\\_ver=Z39.88-](http://sfx.scholarsportal.info/ottawa?url_ver=Z39.88-)

2004&rft\_val\_fmt=info:ofi/fmt:kev:mtx:journal&genre=article&sid=ProQ:ProQ%3Aericshell&atitle=Young+Children%27s+Play+Qualities+in+Same-%2C+Other-%2C+and+Mixed-Sex+Peer+Groups.&title=Child+Development&issn=00093920&date=2003-01-01&volume=74&issue=3&spage=921&au=Fabes%2C+Richard+A.%3BMartin%2C+Carol+Lynn%3BHanish%2C+Laura+D.&isbn=&jtitle=Child+Development&btitle=&rft\_id=info:eric/EJ676633

ER -

TY - RPRT

ID - 2192

T1 - Learning through Drama

A1 - Jensen, Ina

A1 - Rechis, Ruth

A1 - Luna, Don J.

Y1 - 2002/04//

N1 - Availability - Level 1 - Available online, if indexed January 1993 onward

SuppNotes - In: "Early Childhood Literacy: Programs & Strategies To Develop Cultural, Linguistic, Scientific and Healthcare Literacy for Very Young Children & their Families, 2001 Yearbook"; see PS 030 591

Last updated - 2012-12-14

KW - ERIC

KW - Unsupervised Play Addition

KW - Corpus Christi Independent School District TX

KW - Texas (Corpus Christi)

KW - Texas A and M University Corpus Christi

KW - ERIC, Resources in Education (RIE)

KW - Early Childhood Education

KW - Program Descriptions

KW - Class Activities

KW - Young Children

KW - Dramatic Play

KW - Bilingual Education

KW - Childrens Literature

KW - College School Cooperation

KW - Classroom Techniques

KW - Movement Education

KW - Physical Activities

KW - Laboratory Schools

KW - Developmentally Appropriate Practices

KW - Child Development

KW - Child Development Centers

KW - Drama

KW - Teaching Methods

RP - NOT IN FILE

SP - 11

N2 - This chapter is part of a book that recounts the year's work at the Early Childhood Development Center (ECDC) at Texas A & M University-Corpus Christi. Rather than an "elitist" laboratory school for the children of university faculty, the dual-language ECDC is a collaboration between the Corpus Christi Independent School District and the university, with an enrollment representative of Corpus Christi's population. The chapter describes the ECDC's Learning through Drama program, in which children explore weekly concepts through movement and drama. Examples include movement and drama activities related to children's books, mime, field trips, geography, movies, and math, language, and science skills. The chapter includes a list of children's books. (EV)

UR - <http://search.proquest.com/docview/62194954?accountid=14701>

ER -

TY - RPRT

ID - 2193

T1 - Dialogical Drama with Puppets and Children's Creation of Sense

A1 - Bredikyte, Milda

Y1 - 2000/08//

N1 - Availability - Level 1 - Available online, if indexed January 1993 onward

SuppNotes - Paper presented at the European Conference on Quality in Early Childhood Education (EECERA) (10th, London, England, August 29-September 1, 2000)

Last updated - 2012-12-14

KW - ERIC

KW - Unsupervised Play Addition

KW - ERIC, Resources in Education (RIE)

KW - Preschool Education

KW - Thinking Skills

KW - Puppetry

KW - Class Activities

KW - Young Children

KW - Dramatic Play

KW - Scripts

KW - Creative Development

KW - Creative Expression

KW - Comparative Analysis

KW - Creative Thinking

KW - Classroom Research

KW - Acting

KW - Story Telling

RP - NOT IN FILE

SP - 26

N2 - Dialogical drama with puppets is a specific method of revealing basic cultural values for preschool children. For this study, an interactive performance of a puppet show for young children was videotaped, along with a later performance of the same show by the children. The study compared the techniques used by the adult performers and the children and the similarities and differences in the fairy tale plot between the adults' and children's performances. The study also attempted to clarify the possibilities for children's creative expression in this type of activity. Episodes of the adults' and children's presentations were compared regarding composition, texts, addressees, and means of expression. Analysis indicated that the puppet show performed by the children was not a repetition but an independent creative activity that helped the children to shape the process of their own understanding and to discover sense hidden in the fairy tale; sensitive and skillful adult participation seemed key to the quality of the children's creative learning experience. (Contains 10 references.) (EV)

UR - <http://search.proquest.com/docview/62346362?accountid=14701>

ER -

TY - BOOK

ID - 2194

T1 - Making Make-Believe: Fun Props, Costumes and Creative Play Ideas

A1 - Kohl, MaryAnn F.

Y1 - 1999///

N1 - Availability - Level 2 - Produced in microfiche (1966-2003)

SuppNotes - Illustrations by K. Whelan Dery

Last updated - 2012-12-14

KW - ERIC

KW - Unsupervised Play Addition

KW - Costumes

KW - Hats

KW - Masks

KW - Play Learning

KW - Play Materials

KW - ERIC,Resources in Education (RIE)

KW - Early Childhood Education

KW - Puppetry

KW - Play

KW - Class Activities

KW - Young Children

KW - Parent Materials

KW - Dramatic Play

KW - Recipes (Food)

KW - Role Playing

KW - Childrens Literature

KW - Creativity

KW - Imagination

KW - Books

KW - Learning Activities

KW - Pretend Play

KW - Cooking Instruction

KW - Art Activities

RP - NOT IN FILE

SP - 383

PB - Gryphon House, Inc., 10726 Tucker Street, Beltsville, MD 20705; Tel: 800-638-0928 (Toll Free); Fax: 301-595-0051; Web site: gryphonhouse.com (\$14.95).

N2 - Intended to encourage children to develop their imaginations naturally, with only a small amount of help from adults, this book presents over 125 activities for creative and pretend play for young children. The book's introduction describes the importance and benefits of pretend play, the adult's role, and needed materials and space. The activities are presented in seven chapters: (1) "Play Settings and Imagination Spaces"; (2) "Little Scenes and Mini-Play"; (3) "Puppets and Sets"; (4) "Hats, Costumes, and Masks"; (5) "Storybook Play & Pretend," with activities related to popular children's books; (6) "Let's Play Make-Believe"; and (7) "Cooking, Games, and Other Activities Too Fun To Miss." Each activity includes drawings to illustrate the project and icons to assist readers in evaluating the project with regard to type, time needed for preparation, and ease of use. In addition, each activity lists the materials needed, lists the steps for completion, notes which steps require adult supervision, and presents additional ideas related to the activity. Three indices organize activities by type, materials used and skill level, and project name. (KB)

SN - 0876591985

UR - <http://search.proquest.com/docview/62480235?accountid=14701>

L2 - [http://sfx.scholarsportal.info/ottawa?url\\_ver=Z39.88-](http://sfx.scholarsportal.info/ottawa?url_ver=Z39.88-)

2004&rft\_val\_fmt=info:ofi/fmt:kev:mtx:book&genre=book&sid=ProQ:ERIC&atitle=&title=Making+Make-Believe%3A+Fun+Props%2C+Costumes+and+Creative+Play+Ideas.&issn=&date=1999-01-

01&volume=&issue=&spage=383&au=Kohl%2C+MaryAnn+F.&isbn=0876591985&jtitle=&bttitle=Making+M

ake-Believe%3A+Fun+Props%2C+Costumes+and+Creative+Play+Ideas.&rft\_id=info:eric/ED430689

ER -

TY - RPRT

ID - 2195

T1 - Zone of Proximal Development and the World of the Child



A1 - Seng,Seok Hoon

Y1 - 1997/11//

N1 - Availability - Level 1 - Available online, if indexed January 1993 onward

SuppNotes - Paper presented at the Educational Research Association Conference (Singapore, November 24-26, 1997)

Last updated - 2012-12-14

KW - ERIC

KW - Unsupervised Play Addition

KW - Mediated Instruction

KW - Vygotsky (Lev S)

KW - Zone of Proximal Development

KW - ERIC,Resources in Education (RIE)

KW - Early Childhood Education

KW - Academic Aptitude

KW - Scaffolding (Teaching Technique)

KW - Foreign Countries

KW - Cognitive Development

KW - Learning Theories

KW - Child Development

KW - Pretend Play

KW - Educational Research

KW - Teaching Methods

RP - NOT IN FILE

SP - 15

N2 - This paper examines Lev Vygotsky's theory concerning the zone of proximal development (ZPD) in children and its relevance to early childhood education. As per Vygotsky's "Mind in Society" (1978), ZPD is the difference between a child's "actual development level as determined by independent problem solving" and the "potential development as determined through problem solving under adult guidance or in collaboration with more capable peers." The paper focuses on the different nature of ZPD in the context of real world and pretend world activities of young children and how these activities differ in terms of parameters and motivations.

Various studies on the application of ZPD to early childhood education are reviewed, especially in regard to guided participation, scaffolding, mediated learning, and other instructional techniques. The paper concludes by noting that while a Vygotskian perspective has theoretical and concrete value for early childhood education, further investigation is needed to extend Vygotsky's conceptions and to clarify their educational implications.

Contains 14 references. (MDM)

UR - <http://search.proquest.com/docview/62545083?accountid=14701>

ER -

TY - RPRT

ID - 2196

T1 - The Development of Private Speech among Two- to Five-Year-Olds in the Naturalistic Preschool Setting

A1 - Kirby,Kathleen Campano

Y1 - 1997/04//

N1 - Availability - Level 1 - Available online, if indexed January 1993 onward

SuppNotes - Paper presented at the Biennial Conference of the Society for Research in Child Development (62nd, Washington, DC, April 3-6, 1997)

Last updated - 2012-12-14

KW - ERIC

KW - Unsupervised Play Addition

KW - Private Speech

KW - Vygotsky (Lev S)

KW - ERIC,Resources in Education (RIE)

KW - Preschool Education

KW - Context Effect

KW - Play

KW - Developmental Stages

KW - Preschool Children

KW - Age Differences

RP - NOT IN FILE

SP - 11

N2 - In this study, preschoolers were observed in the naturalistic preschool context to determine the development of private speech over the preschool years and contextual influences on its occurrence among 3- to 5-year-olds. Thirty-nine preschoolers were observed in their preschool classroom 4 times in 10-minute segments during free choice play activities. Each observation was coded for the child's type of play, the goal of the activity, adult presence, peer involvement, private speech, and social speech. The results showed that each preschooler emitted some type of private speech over the course of the investigation and that the total amount of private speech declined linearly as age increased. This age-related decline in private speech, with the highest incidence at age 2, suggests that Vygotsky's hypothesis of a curvilinear development trend needs to be modified. Children's changing activities during free choice periods in the preschool setting may have influenced this trend. (Author/HTH)

UR - <http://search.proquest.com/docview/62509872?accountid=14701>

ER -

TY - JOUR

ID - 2197

T1 - The Relation between Individual Differences in Fantasy and Theory of Mind

A1 - Taylor,Marjorie

A1 - Carlson,Stephanie M.

Y1 - 1997///

KW - ERIC

KW - Unsupervised Play Addition

KW - False Beliefs

KW - Perceived Reality

KW - Representational Thinking

KW - theory of mind

KW - ERIC,Current Index to Journals in Education (CIJE)

KW - Childhood Attitudes

KW - Cognitive Processes

KW - Cognitive Development

KW - Fantasy

KW - Perspective Taking

KW - Pretend Play

KW - Preschool Children

RP - NOT IN FILE

SP - 436

EP - 455

JF - Child Development

JA - Child Dev.

VL - 68

IS - 3

N2 - Examined relation between early fantasy/pretense and knowledge about mental life in 3- and 4-year olds. Found that performance on theory of mind tasks was significantly intercorrelated when effects of verbal intelligence and age were statistically controlled. Individual differences in fantasy/pretense were related to theory of mind performance in 4-year olds, independent of verbal intelligence. (Author/KB)

SN - 0009-3920, 0009-3920

UR - <http://search.proquest.com/docview/62507383?accountid=14701>

L2 - [http://sfx.scholarsportal.info/ottawa?url\\_ver=Z39.88-](http://sfx.scholarsportal.info/ottawa?url_ver=Z39.88-)

2004&rft\_val\_fmt=info:ofi/fmt:kev:mtx:journal&genre=article&sid=ProQ:ProQ%3Aericshell&atitle=The+Relation+between+Individual+Differences+in+Fantasy+and+Theory+of+Mind.&title=Child+Development&issn=00093920&date=1997-01-

01&volume=68&issue=3&spage=436&au=Taylor%2C+Marjorie%3BCarlson%2C+Stephanie+M.&isbn=&jtitle=Child+Development&btitle=&rft\_id=info:eric/EJ549520

ER -

TY - GEN

ID - 2198

T1 - Peer Conflicts in the Classroom. ERIC Digest

A1 - Wheeler,Edyth J.

Y1 - 1994/09//

N1 - Availability - Level 1 - Available online, if indexed January 1993 onward

Last updated - 2012-12-14

KW - ERIC

KW - Unsupervised Play Addition

KW - ERIC Digests

KW - ERIC,Resources in Education (RIE)

KW - Teachers

KW - Parents

KW - Practitioners

KW - Teacher Student Relationship

KW - Play

KW - Young Children

KW - Classroom Environment

KW - Adult Child Relationship

KW - Conflict Resolution

KW - Conflict

KW - Peer Relationship

KW - Verbal Ability

KW - Sex Differences

KW - Social Development

KW - Age Differences

RP - NOT IN FILE

SP - 3

N2 - Recent theory and research suggest that peer conflict contributes to children's development and represents an important form of social interaction. Research has identified structural features of children's conflict as issues, such as control of objects or physical space; strategies, including aggressive and nonaggressive physical and verbal tactics; and outcomes, such as an unresolved situation, an adult-imposed solution, one child's submission to another, or a mutually agreed-upon solution. Studies of children's conflicts indicate that age makes a difference in conflict resolution; the role of gender, however, is not as clear. Children's conflicts during play are influenced by the play setting, the children's prior relationships, and the presence of adults. Disputes are more likely to occur in closed than open play areas, children who were playing together before a conflict are more likely to resolve the conflict than children who were not playing together, and children more often generate their own solutions to conflicts when an adult is absent than when an adult is present. Implications for teachers and parents can be drawn from the research on children's conflicts. Teachers should: (1) be aware of children's intentions in an apparent conflict; (2) let children who are verbally competent try to resolve their conflict themselves; (3) note whether children were playing together before the conflict; (4) make play spaces accessible and provide ample play materials; and (5) help children, in conflicts characterized by physical strategies, to find words to use to express their feelings. (BC)

UR - <http://search.proquest.com/docview/62820186?accountid=14701>

ER -

TY - GEN

ID - 2199

T1 - Self Talk in Normal and Autistic Children

A1 - Kerr,Kaye M.

Y1 - 1993/03//

N1 - Availability - Level 1 - Available online, if indexed January 1993 onward

SuppNotes - Paper presented at the Society for Research in Child Development (New Orleans, LA, March 25-

28, 1993)

Last updated - 2012-12-14

KW - ERIC

KW - Unsupervised Play Addition

KW - Self Talk

KW - ERIC,Resources in Education (RIE)

KW - Preschool Education

KW - Play

KW - Foreign Countries

KW - Speech Habits

KW - Videotape Recordings

KW - Adults

KW - Preschool Children

KW - Interpersonal Relationship

KW - Speech

KW - Autism

RP - NOT IN FILE

SP - 17

N2 - This investigation compared self-talk use in five preschool autistic children (ages 57 to 86 months) and in matched chronological age and mental age peer groups. Videotape recordings of the children during free play with and without an adult were coded for the following self-talk categories: (1) private, mastery speech; (2) stereotypic repetitions; (3) word play; (4) self-regulative speech; (5) utterances; and (6) mouthing of words. All three groups exhibited fewer instances of self-talk in the presence of adults than without an adult. The autistic children demonstrated a similar pattern of self-talk with adults as did their control peers. Autistic children showed less consistency in behaviors between the adult present and adult absent situation than did controls; this was not felt to reflect their lack of response to adults in their environment, but rather to the high production of utterances and private mastery talk when they were not with an adult. (Contains six figures/tables.) (JDD)

UR - <http://search.proquest.com/docview/62773526?accountid=14701>

ER -

TY - RPRT

ID - 2200

T1 - Developmental Changes in Toddlers' Social Orientation and Affect during Mastery Play

A1 - Jennings,Kay Donahue

Y1 - 1993/03//

N1 - Availability - Level 1 - Available online, if indexed January 1993 onward

SuppNotes - Paper presented at the Biennial Meeting of the Society for Research in Child Development (60th, New Orleans, LA, March 25-28, 1993)

Last updated - 2012-12-14

KW - ERIC

KW - Unsupervised Play Addition

KW - Internalization

KW - Mastery Motivation

KW - Mastery Task

KW - ERIC,Resources in Education (RIE)

KW - Preschool Education

KW - Toddlers

KW - Cognitive Ability

KW - Play

KW - Cognitive Development

KW - Attention Span

KW - Mastery Learning

RP - NOT IN FILE

SP - 14

N2 - This study explored how toddlers' increasing social sophistication and increasing ability to coordinate attention between the social and object realm are reflected in toddlers' mastery play. A total of 57 toddlers (24

boys and 33 girls from a wide range of socio-economic backgrounds) between the ages of 15 and 35 months participated in 7 mastery tasks initially presented by an adult examiner. The study examined developmental changes in three areas: (1) regulation of attention to tasks and people; (2) regulation of affect during mastery play; and (3) internalization of mastery standards. It was found that younger toddlers, as expected, required more adult prompts to maintain their task focus, but were able to coordinate their attention to objects and persons about as well as older toddlers. Younger toddlers also had more difficulty regulating negative affect to frustrations inherent in mastery tasks, although responses to failure were generally similar across age groups. Evidence of internalization of culturally defined standards for mastery, such as pride in task completion, was found for even the youngest toddlers. The results suggest greater sophistication in young toddlers' mastery play than was previously thought. (MDM)

UR - <http://search.proquest.com/docview/62781763?accountid=14701>

ER -

TY - RPRT

ID - 2201

T1 - Anatomical Doll Play among Young Children: A Follow-Up of Sexual Demonstrators and Doll Avoiders

A1 - Boat, Barbara W.

A1 - Everson, Mark D.

Y1 - 1989/08//

N1 - Availability - Level 1 - Available online, if indexed January 1993 onward

SuppNotes - Paper presented at the Annual Meeting of the American Psychological Association (97th, New Orleans, LA, August, 1989)

Last updated - 2012-12-14

KW - ERIC

KW - Unsupervised Play Addition

KW - Anatomically Correct Dolls

KW - Comfort Index

KW - Sex Knowledge

KW - ERIC, Resources in Education (RIE)

KW - Preschool Education

KW - Play

KW - Mothers

KW - Videotape Recordings

KW - Individual Development

KW - Test Reliability

KW - Knowledge Level

KW - Followup Studies

KW - Diagnostic Tests

KW - Sexual Abuse

KW - Preschool Children

KW - Early Experience

KW - Child Abuse

RP - NOT IN FILE

SP - 15

N2 - As one phase of an extensive research project, normative data on the anatomical doll play of 209 nonreferred 2- through 5-year-old children were collected which revealed extreme, non-normative responses among some 4- and 5-year-olds. Later, a follow-up study was conducted to investigate the consistency of non-normative behavior over time and to explore children's knowledge of genital intercourse, as well as sources of that knowledge. In the normative study, 5 percent of subjects (Demonstrators) clearly placed the dolls in intercourse positions and 8 percent (Avoiders) refused to touch the unclothed dolls. Involving 40 of the original participants, including 10 Demonstrators and 10 Avoiders, follow-up occurred 16 months after the initial study and matched Demonstrator and Avoider subjects to 20 controls on gender, race, and socioeconomic status. Findings revealed changes over time in Demonstrators' and Avoiders' behaviors that may be explained by cultural, maturational, and socialization factors. Most Demonstrators indicated that they had learned about intercourse from watching sexually explicit videos. Implications for children's testimony concerning sexual abuse and for understanding children's behaviors are explored. It is concluded that anatomical dolls can never be

a definitive test of child sexual abuse, that the presence of an adult interviewer appears to have an inhibiting effect on children's exploratory behaviors with the dolls, that even 6- and 7-year-olds may need professional support in disclosing sexual abuse, and that further research is needed. (RH)

UR - <http://search.proquest.com/docview/63062623?accountid=14701>

ER -

TY - GEN

ID - 2203

T1 - Strawberry Shortcake and Other Jumping Rope Ideas

A1 - Adams,Polly K.

A1 - Taylor,Michael K.

Y1 - 1982///

N1 - Availability - Level 1 - Available online, if indexed January 1993 onward

Last updated - 2012-12-14

KW - ERIC

KW - Unsupervised Play Addition

KW - Jump Roping

KW - PF Project

KW - Rhyme

KW - ERIC,Resources in Education (RIE)

KW - Teachers

KW - Practitioners

KW - Elementary Education

KW - Sequential Approach

KW - Play

KW - Aerobics

KW - Physical Fitness

KW - Guidelines

KW - Physical Development

KW - Cardiovascular System

KW - Exercise

KW - Childrens Games

KW - Physical Activities

KW - Cultural Influences

KW - Recreational Activities

KW - Games

KW - Playground Activities

RP - NOT IN FILE

SP - 14

N2 - Information, guidelines, and activities for jumping rope are given. A short history of jumping rope explains how it evolved from a spring ritual for men to a play activity involving mostly young girls. Physical and cultural reasons are given as to why jumping rope has been more a sport for girls than for boys. Research studies are noted which show that jumping rope is a good cardiopulmonary activity that is being included in present-day adult fitness routines. It is pointed out that jumping rope provides an excellent source of release from tension and stress, and is an effective vehicle for achieving and maintaining appropriate fitness levels. Advice is given on selecting commercial ropes, making jump ropes, fitting the rope to the jumper, storing and cleaning ropes, and integrating rope jumping into the rest of the curriculum. The remainder of this document contains 39 jump rope activities arranged in a skill-building sequence which includes: (1) beginner rope exercises; (2) single jumping exercises; (3) double exercises; and (4) exercises using rhythms and chants for children to recite while jumping. Concluding this document are 14 references to journal articles and books.

(EM)

UR - <http://search.proquest.com/docview/63423599?accountid=14701>

L2 - [http://sfx.scholarsportal.info/ottawa?url\\_ver=Z39.88-](http://sfx.scholarsportal.info/ottawa?url_ver=Z39.88-)

2004&rft\_val\_fmt=info:ofi/fmt:kev:mtx:journal&genre=unknown&sid=ProQ:ProQ%3Aericshell&atitle=Strawberry+Shortcake+and+Other+Jumping+Rope+Ideas.&title=&issn=&date=1982-01-

01&volume=&issue=&spage=14&au=Adams%2C+Polly+K.%3BTaylor%2C+Michael+K.&isbn=&jtitle=&bt  
tle=&rft\_id=info:eric/ED242386

ER -

TY - RPRT

ID - 2204

T1 - The Effects of a Playgroup Experience on Mother-Child and Father-Child Interaction

A1 - Vandell,Deborah Lowe

Y1 - 1978/03//

N1 - Availability - Level 1 - Available online, if indexed January 1993 onward

SuppNotes - An earlier version of this paper was presented at the Southwestern Society for Research in Human Development Conference (Dallas, Texas, March 17-18, 1978)

Last updated - 2012-12-14

KW - ERIC

KW - Unsupervised Play Addition

KW - ERIC,Resources in Education (RIE)

KW - Play

KW - Responses

KW - Mothers

KW - social relations

KW - Fathers

KW - Parent Child Relationship

KW - Infant Behavior

KW - Child Rearing

KW - Intergroup Relations

KW - Parent Attitudes

KW - Interaction Process Analysis

KW - Research

KW - Preschool Children

KW - Early Experience

KW - Peer Groups

RP - NOT IN FILE

SP - 31

N2 - The purpose of this study was to compare the mother-child and father-child interaction of six toddlers who were completely home reared with the interactions of six toddlers who were participants in a daily 3-hour playgroup. For the comparisons, both mother-child and father-child interactions were videotaped in a semi-structured laboratory setting. The first observation was made immediately before the beginning of the playgroup experience, with subsequent observations being made after half of the toddlers had been in a playgroup three and six months. While there were no differences in the playgroup and homecare toddlers before the playgroup experience, significant differences were found after the playgroup experience. The playgroup toddlers became proportionally more active in their social interactions. They also became more responsive to the interaction initiations of their parents. Significant differences were also found in parental behavior as a function of the playgroup experience. The parents of the playgroup children became significantly less controlling. In addition to playgroup/homecare differences, significant differences were also found in mother-child and father-child interaction independent of the playgroup experience. (Author/CM)

UR - <http://search.proquest.com/docview/63842740?accountid=14701>

L2 - [http://sfx.scholarsportal.info/ottawa?url\\_ver=Z39.88-](http://sfx.scholarsportal.info/ottawa?url_ver=Z39.88-)

2004&rft\_val\_fmt=info:ofi/fmt:kev:mtx:book&genre=unknown&sid=ProQ:ERIC&atitle=&title=The+Effects+o  
f+a+Playgroup+Experience+on+Mother-Child+and+Father-Child+Interaction.&issn=&date=1978-03-

01&volume=&issue=&spage=31&au=Vandell%2C+Deborah+Lowe&isbn=&jtitle=&bt  
tle=The+Effects+of+a+  
Playgroup+Experience+on+Mother-Child+and+Father-Child+Interaction.&rft\_id=info:eric/ED153726

ER -

TY - GEN

ID - 2205

T1 - Social Studies: The Child's Point of View

A1 - Wheeler,Ronald  
A1 - Losito,William F.  
Y1 - 1978///  
N1 - Last updated - 2012-12-14  
KW - ERIC  
KW - Unsupervised Play Addition  
KW - ERIC,Current Index to Journals in Education (CIJE)  
KW - Elementary Education  
KW - Concept Formation  
KW - Play  
KW - Anthropology  
KW - Human Relations  
KW - Social Studies  
KW - Observation  
KW - Interpersonal Relationship  
KW - CHILDREN  
KW - Peer Relationship  
RP - NOT IN FILE  
SP - 378  
EP - 380  
JF - Social Education  
VL - 42  
IS - 5  
N2 - Excerpts from observational diaries kept by education students acting as anthropologists studying the conceptual tools of young children at home and in school. Notes describe children's rules for activities and games; individual projects; and reactions to social studies concepts presented from an "adultcentric" point of view. (AV)  
UR - <http://search.proquest.com/docview/63882134?accountid=14701>  
L2 - [http://sfx.scholarsportal.info/ottawa?url\\_ver=Z39.88-2004&rft\\_val\\_fmt=info:ofi/fmt:kev:mtx:journal&genre=unknown&sid=ProQ:ProQ%3Aericshell&atitle=Social+Studies%3A+The+Child%27s+Point+of+View&title=Social+Education&issn=&date=1978-01-01&volume=42&issue=5&spage=378&au=Wheeler%2C+Ronald%3BLosito%2C+William+F.&isbn=&jtitle=Social+Education&bttitle=&rft\\_id=info:eric/EJ178580](http://sfx.scholarsportal.info/ottawa?url_ver=Z39.88-2004&rft_val_fmt=info:ofi/fmt:kev:mtx:journal&genre=unknown&sid=ProQ:ProQ%3Aericshell&atitle=Social+Studies%3A+The+Child%27s+Point+of+View&title=Social+Education&issn=&date=1978-01-01&volume=42&issue=5&spage=378&au=Wheeler%2C+Ronald%3BLosito%2C+William+F.&isbn=&jtitle=Social+Education&bttitle=&rft_id=info:eric/EJ178580)  
ER -  
  
TY - RPRT  
ID - 2206  
T1 - The Effects of Age, Sex, and Adult Presence on Preschool Children's Sex-Typed Toy Play Behavior  
A1 - Garrett,Candace Schau  
Y1 - 1977/08//  
N1 - Availability - Level 1 - Available online, if indexed January 1993 onward  
Last updated - 2012-12-14  
KW - ERIC  
KW - Unsupervised Play Addition  
KW - ERIC,Resources in Education (RIE)  
KW - Sex Role  
KW - Play  
KW - Research Projects  
KW - Sex Differences  
KW - Child Development  
KW - Toys  
KW - Preschool Children  
RP - NOT IN FILE  
SP - 23  
PB - C. S. Garrett, Department of Educational Foundations, College of Education, University of New Mexico, Albuquerque, NM 87131



N2 - Subjects were 26 female three-, four- and five-year-old children who free-played four different sets, each containing a culturally-defined feminine, masculine and neutral toy. A same- or opposite-sex adult was either present or absent during play. Results included the following: (1) girls played longer than boys with feminine and neutral toys, while boys played longer than girls with masculine toys; (2) there was a linear increase with age in the length of time both sexes played with feminine toys, but no age differences were found for masculine or neutral toys; and (3) there were no effects due to adult presence. These results are discussed in terms of sex-role development and methodological needs in psychometric and observational sex-typing research. (Author)

UR - <http://search.proquest.com/docview/63745971?accountid=14701>

L2 - [http://sfx.scholarsportal.info/ottawa?url\\_ver=Z39.88-](http://sfx.scholarsportal.info/ottawa?url_ver=Z39.88-)

2004&rft\_val\_fmt=info:ofi/fmt:kev:mtx:book&genre=unknown&sid=ProQ:ERIC&atitle=&title=The+Effects+of+Age%2C+Sex%2C+and+Adult+Presence+on+Preschool+Children%27s+Sex-

Typed+Toy+Play+Behavior.&issn=&date=1977-08-

01&volume=&issue=&spage=23&au=Garrett%2C+Candace+Schau&isbn=&jtitle=&btittle=The+Effects+of+Age%2C+Sex%2C+and+Adult+Presence+on+Preschool+Children%27s+Sex-

Typed+Toy+Play+Behavior.&rft\_id=info:eric/ED160910

ER -

TY - GEN

ID - 2207

T1 - Play, Recreation and Leisure for People Who Are Deaf-Blind

A1 - Nesbitt,John A.

Y1 - 1975/04//

N1 - Availability - Level 1 - Available online, if indexed January 1993 onward

SuppNotes - Based on papers and preceedings of: National Institute on Program Development and Training in Recreation for Deaf-Blind Children, Youth and Adults (University of Iowa, April 29 - May 1, 1974)

Last updated - 2012-12-14

KW - ERIC

KW - Unsupervised Play Addition

KW - Parent Resources

KW - ERIC,Resources in Education (RIE)

KW - Athletics

KW - Play

KW - Camping

KW - Leisure Time

KW - Play Therapy

KW - Exceptional Child Services

KW - Rehabilitation Counseling

KW - Deaf Blind

KW - Recreation

KW - Advocacy

KW - Recreational Activities

KW - Severe Disabilities

KW - Resource Materials

KW - Games

KW - Playground Activities

RP - NOT IN FILE

SP - 49

N2 - Based on position papers and proceedings of the National Institute on Program Development and Training in Recreation for Deaf-Blind Children, Youth, and Adults, the document presents approximately 50 brief articles for use by parents, teachers, rehabilitation personnel, and therapeutic recreation personnel. Sections cover the following topics (sample article topics in parentheses): perspectives on recreation (suggestions for activities and games); play, recreation, and leisure (arts and crafts, camping, and sports); leisure education (role of the school); special considerations in recreation (problems and issues); consumerism and advocacy for recreation (strategies for advocacy); evaluation in recreation (evaluation of motor skills); guidelines on recreation (recreation's contribution to rehabilitation and education); administration of recreation (coordinating

development of services); and sources of information and assistance (regional centers, and information and research centers). Included is a listing of contributors with brief background sketches. (IM)

UR - <http://search.proquest.com/docview/63893240?accountid=14701>

ER -

© 2015 by the authors; licensee MDPI, Basel, Switzerland. This article is an open access article distributed under the terms and conditions of the Creative Commons Attribution license (<http://creativecommons.org/licenses/by/4.0/>).
